# Supplementary material for: Gene duplication and cellular divergence in crops
Source: Research Square preprint supplement (doi:10.21203/rs.3.rs-1739501/v1), 2022-06-17
Supplement: Supplementary file 1 [file 2741b603036575eb07e26ffb.csv]

Sorghum	Maize_genome_V4	M1_or_M2	Duplicate Location	Sorghum_Score_M1	Sorghum_Score_M2	Maize_Score_M1	Maize_Score_M2	Mean FC Score	SorghumID
LOC8055448	Zm00001d001763	M1		0.841295017	0.857621312	0.908205439	0.958131177	0.891313236	SORBI_3006G274500
LOC8055449	Zm00001d001765	M1		0.920162455	0.914176275	0.949668421	0.96272989	0.93668426	SORBI_3006G274600
LOC8055446	Zm00001d001771	M1		0.870594576	0.859084172	0.989849827	0.989849827	0.9273446	SORBI_3006G274200
LOC8076487	Zm00001d001786	M1		0.935195273	0.908517314	0.81141488	0.784920329	0.860011949	SORBI_3006G272500
LOC8085888	Zm00001d001789	M1		0.945912652	0.945485343	0.784934998	0.793993069	0.867581515	SORBI_3006G271500
LOC8085886	Zm00001d001791	M1		0.873963005	0.944276558	0.996373104	0.996219997	0.952708166	SORBI_3006G271100
LOC110436362	Zm00001d001799	M1		0.861613381	0.863495852	0.916211013	0.912135798	0.888364011	SORBI_3006G270600
LOC8076480	Zm00001d001803	M1		0.968571594	0.969895867	0.872625924	0.888242844	0.924834057	SORBI_3006G270400
LOC8076479	Zm00001d001804	M1		0.762881836	0.729301484	0.777474008	0.751313787	0.755242779	SORBI_3006G270300
LOC8076477	Zm00001d001807	M1		0.762512271	0.78614517	0.468848672	0.434002604	0.612877179	SORBI_3006G270000
LOC8076476	Zm00001d001808	M1		0.9973707	0.997143572	0.982934725	0.984432587	0.990470396	SORBI_3006G269900
LOC8085882	Zm00001d001809	M1		0.890624218	0.888426077	0.863560519	0.856693621	0.874826109	SORBI_3006G269800
LOC8085879	Zm00001d001812	M1		0.92902816	0.908944623	0.965123861	0.966157532	0.942313544	SORBI_3006G269400
LOC8076474	Zm00001d001813	M1		0.760760688	0.738929417	0.835953573	0.806314979	0.785489664	SORBI_3006G269000
LOC8076468	Zm00001d001820	M1		0.917159741	0.922325948	0.982554963	0.976999102	0.949759938	SORBI_3006G268200
LOC8085873	Zm00001d001827	M1		0.913356303	0.915184879	0.94290335	0.942144782	0.928397328	SORBI_3006G267600
LOC8085871	Zm00001d001830	M1		0.867353185	0.838856488	0.864697361	0.849691035	0.855149517	SORBI_3006G267300
LOC8076462	Zm00001d001832	M1		0.996300502	0.995164433	0.985773328	0.987210884	0.991112287	SORBI_3006G267000
LOC8076458	Zm00001d001842	M1		0.790664639	0.790664639	0.872719805	0.872719805	0.831692222	SORBI_3006G266000
LOC8085862	Zm00001d001844	M1		0.955305757	0.95748465	0.802573482	0.762403506	0.869441849	SORBI_3006G265800
LOC8085861	Zm00001d001845	M1		0.835843936	0.84167998	0.899784652	0.905643264	0.870737958	SORBI_3006G265700
LOC8070318	Zm00001d001847	M1		0.990040999	0.990040999	0.970453087	0.970920863	0.980363987	SORBI_3006G265300
LOC8085859	Zm00001d001848	M1		0.97995111	0.988073836	0.990514696	0.985855474	0.986098779	SORBI_3006G265200
LOC8070317	Zm00001d001849	M1		0.854741786	0.848794102	0.790867668	0.813656783	0.827015085	SORBI_3006G265000
LOC110436322	Zm00001d001856	M1		0.941558717	0.925428753	0.826841227	0.819156719	0.878246354	SORBI_3006G264300
LOC8085854	Zm00001d001858	M1		0.583639058	0.560408232	0.665267616	0.64313952	0.613113607	SORBI_3006G264100
LOC8070314	Zm00001d001859	M1		0.966273362	0.938675341	0.908471313	0.917254952	0.932668742	SORBI_3006G264000
LOC8085853	Zm00001d001860	M1		0.979473755	0.979473755	0.983060226	0.984559107	0.981641711	SORBI_3006G263800
LOC8085852	Zm00001d001861	M1		0.95726907	0.955806209	0.890160442	0.849559015	0.913198684	SORBI_3006G263700
LOC110436167	Zm00001d001864	M1		0.832956711	0.839439493	0.586131434	0.566573967	0.706275401	SORBI_3006G263400
LOC8085849	Zm00001d001868	M1		0.936935307	0.935391604	0.83748556	0.809395456	0.879801982	SORBI_3006G263100
LOC8070310	Zm00001d001869	M1		0.799183878	0.790479857	0.639960638	0.706412161	0.734009133	SORBI_3006G263000
LOC8085848	Zm00001d001870	M1		0.843512405	0.863253325	0.958813283	0.951957387	0.9043841	SORBI_3006G262900
LOC8082591	Zm00001d001881	M1		0.957442304	0.964021327	0.883551534	0.919537195	0.93113809	SORBI_3006G261700
LOC8070303	Zm00001d001896	M1		0.773911035	0.79086867	0.57543961	0.606320113	0.686634857	SORBI_3006G260800
LOC8070302	Zm00001d001897	M1		0.935303062	0.936623487	0.92554871	0.924380696	0.930463989	SORBI_3006G260600
LOC8070295	Zm00001d001905	M1		0.722033376	0.684229549	0.747050015	0.750077012	0.725847488	SORBI_3006G259201
LOC8070290	Zm00001d001913	M1		0.943803053	0.925532693	0.728525588	0.804375419	0.850559188	SORBI_3006G257900
LOC8070289	Zm00001d001914	M1		0.805647412	0.804176852	0.840604544	0.820301813	0.817682655	SORBI_3006G257800
LOC8070284	Zm00001d001933	M1		0.962938725	0.984308895	0.915485817	0.892656362	0.938847449	SORBI_3006G256500
LOC8082562	Zm00001d001935	M1		0.860250611	0.822966912	0.652166419	0.663954135	0.749834519	SORBI_3006G256300
LOC8082560	Zm00001d001939	M1		0.902415645	0.892202568	0.938878193	0.939704788	0.918300298	SORBI_3006G255900
LOC110436398	Zm00001d001940	M1		0.974057321	0.966292611	0.9209829	0.943029503	0.951090584	SORBI_3006G255800
LOC8082559	Zm00001d001941	M1		0.596292803	0.543350079	0.538400719	0.539209059	0.554313165	SORBI_3006G255600
LOC8082558	Zm00001d001943	M1		0.465282082	0.449159818	0.829509833	0.826164806	0.642529135	SORBI_3006G255500
LOC8082555	Zm00001d001946	M1		0.93291629	0.928277482	0.938330552	0.908586831	0.927027789	SORBI_3006G255100
LOC8082554	Zm00001d001947	M1		0.876153446	0.876153446	0.756736405	0.739186241	0.812057385	SORBI_3006G255000
LOC8082553	Zm00001d001949	M1		0.937524301	0.93710854	0.839327429	0.804800411	0.87969017	SORBI_3006G254800
LOC8082552	Zm00001d001951	M1		0.95443959	0.963540123	0.953998203	0.910550635	0.945632138	SORBI_3006G254700
LOC110436332	Zm00001d001962	M1		0.949862376	0.943167863	0.980811192	0.982146066	0.963996874	SORBI_3006G252900
LOC8070274	Zm00001d001968	M1		0.985082671	0.987773565	0.995001559	0.995007059	0.990716213	SORBI_3006G251900
LOC8082540	Zm00001d001973	M1		0.974792601	0.972744596	0.993941728	0.99531254	0.984197866	SORBI_3006G251600
LOC8082536	Zm00001d001979	M1		0.926937809	0.884876715	0.973193428	0.954349035	0.934839247	SORBI_3006G250900
LOC8070268	Zm00001d001980	M1		0.872099782	0.873135334	0.834794727	0.83885894	0.854722196	SORBI_3006G250800
LOC110436527	Zm00001d001983	M1		0.916763228	0.920224049	0.91573468	0.925837505	0.919639865	SORBI_3006G250300
LOC8070265	Zm00001d001984	M1		0.371886128	0.414751795	0.555236812	0.518410131	0.465071216	SORBI_3006G250200
LOC8070264	Zm00001d001987	M1		0.784632264	0.773664658	0.90743807	0.907380311	0.843278826	SORBI_3006G250100
LOC8082528	Zm00001d001995	M1		0.945781764	0.981687294	0.826925655	0.840723912	0.898779656	SORBI_3006G248700
LOC8082527	Zm00001d001999	M1		0.863237927	0.859877197	0.918485432	0.930836863	0.893109355	SORBI_3006G248400
LOC8070256	Zm00001d002000	M1		0.652970955	0.650830558	0.644721117	0.635292004	0.645953658	SORBI_3006G248300
LOC8070255	Zm00001d002001	M1		0.944372798	0.936419456	0.963972675	0.964520315	0.952321311	SORBI_3006G248200
LOC8079613	Zm00001d002003	M1		0.96766693	0.972398129	0.948074702	0.943145938	0.957821425	SORBI_3006G247900
LOC8070254	Zm00001d002004	M1		0.968945008	0.965588128	0.990532666	0.987849228	0.978228757	SORBI_3006G247800
LOC8070247	Zm00001d002021	M1		0.88913056	0.93890247	0.868301031	0.850134771	0.886617208	SORBI_3006G246100
LOC8068504	Zm00001d002025	M1		0.781668046	0.811375666	0.5911803	0.4238737	0.652024428	SORBI_3006G245500
LOC8068505	Zm00001d002026	M1		0.900660212	0.914988547	0.897377316	0.952239764	0.91631646	SORBI_3006G245600
LOC110436531	Zm00001d002027	M1		0.944395896	0.947514099	0.978256963	0.984968003	0.963783741	SORBI_3006G245700
LOC8068496	Zm00001d002036	M1		0.96556118	0.943383443	0.989295341	0.987253098	0.971373266	SORBI_3006G244300
LOC8068494	Zm00001d002038	M1		0.959101496	0.959101496	0.90815043	0.91212938	0.9346207	SORBI_3006G244000
LOC8068492	Zm00001d002046	M1		0.911935788	0.922624509	0.855693892	0.875567963	0.891455538	SORBI_3006G243500
LOC8079595	Zm00001d002052	M1		0.553973784	0.432202183	0.697539896	0.694345327	0.594515298	SORBI_3006G243200
LOC8068490	Zm00001d002053	M1		0.933320501	0.933320501	0.98342532	0.95996235	0.952507168	SORBI_3006G243100
LOC8079594	Zm00001d002054	M1		0.978218775	0.978218775	0.9294371	0.931211227	0.954271469	SORBI_3006G243000
LOC8068488	Zm00001d002058	M1		0.910773199	0.893511443	0.908821534	0.893369272	0.901618862	SORBI_3006G242401
LOC8079587	Zm00001d002066	M1		0.873092988	0.862179277	0.973665585	0.966133084	0.918767734	SORBI_3006G241900
LOC8079586	Zm00001d002068	M1		0.915827767	0.921024772	0.912768294	0.955683909	0.926326186	SORBI_3006G241800
LOC8068481	Zm00001d002082	M1		0.901229958	0.904636883	0.950616095	0.95309973	0.927395667	SORBI_3006G240300
LOC8068480	Zm00001d002084	M1		0.985991184	0.98761188	0.933810074	0.93359004	0.960250794	SORBI_3006G240100
LOC8079574	Zm00001d002085	M1		0.903312609	0.907019806	0.954783725	0.953581055	0.929674299	SORBI_3006G239800
LOC8079571	Zm00001d002086	M1		0.90277751	0.910896387	0.899045908	0.904055962	0.904193942	SORBI_3006G239400
LOC8068476	Zm00001d002090	M1		0.74477701	0.723269109	0.835887563	0.826774483	0.782677041	SORBI_3006G238700
LOC8068475	Zm00001d002091	M1		0.884164533	0.883744923	0.82346297	0.832614555	0.855996745	SORBI_3006G238600
LOC8079566	Zm00001d002095	M1		0.951090409	0.958666487	0.927232277	0.944048994	0.945259542	SORBI_3006G237900
LOC8068469	Zm00001d002098	M1		0.813947222	0.826191194	0.888011808	0.883446712	0.852899234	SORBI_3006G237500
LOC8079565	Zm00001d002099	M1		0.986795758	0.984874791	0.939962778	0.918589826	0.957555788	SORBI_3006G237400
LOC8079563	Zm00001d002104	M1		0.991419167	0.991669393	0.909699226	0.898164549	0.947738084	SORBI_3006G237100
LOC8068468	Zm00001d002105	M1		0.982557311	0.980432314	0.988901724	0.985682197	0.984393387	SORBI_3006G237200
LOC8079562	Zm00001d002115	M1		0.967586087	0.975127519	0.843674325	0.838680529	0.906267115	SORBI_3006G236800
LOC8068460	Zm00001d002126	M1		0.90435586	0.899366735	0.759080991	0.769083986	0.832971893	SORBI_3006G235800
LOC8068458	Zm00001d002128	M1		0.802806383	0.856574211	0.48567578	0.421482663	0.641634759	SORBI_3006G235500
LOC8079555	Zm00001d002129	M1		0.995738456	0.995738456	0.982877679	0.977060711	0.987853826	SORBI_3006G235400
LOC8068457	Zm00001d002130	M1		0.955967894	0.955967894	0.989398023	0.983293544	0.971156839	SORBI_3006G235350
LOC8068453	Zm00001d002135	M1		0.912701865	0.901695763	0.955275318	0.949667198	0.929835036	SORBI_3006G234700
LOC8079553	Zm00001d002137	M1		0.454687891	0.459338248	0.870890914	0.911872674	0.674197432	SORBI_3006G234300
LOC8068450	Zm00001d002139	M1		0.192296884	0.202713991	0.282415608	0.312668464	0.247523737	SORBI_3006G233800
LOC8068447	Zm00001d002140	M1		0.956506843	0.970034454	0.944945022	0.936384473	0.951967698	SORBI_3006G233000
LOC8079544	Zm00001d002147	M1		0.963759552	0.957530845	0.967315564	0.968009241	0.964153801	SORBI_3006G232400
LOC110436404	Zm00001d002148	M1		0.966862356	0.977810714	0.995533308	0.991377515	0.982895973	SORBI_3006G232200
LOC8068443	Zm00001d002153	M1		0.807002483	0.813639251	0.566660249	0.614122522	0.700356126	SORBI_3006G231900
LOC8079542	Zm00001d002154	M1		0.987919851	0.989852367	0.968563727	0.975324092	0.980415009	SORBI_3006G231800
LOC8068441	Zm00001d002157	M1		0.773953381	0.745500741	0.86644704	0.874958285	0.815214862	SORBI_3006G231400
LOC8074768	Zm00001d002158	M1		0.982041461	0.982056859	0.964176614	0.896726993	0.956250482	SORBI_3006G230900
LOC8074765	Zm00001d002163	M1		0.698050161	0.695162936	0.588602233	0.588576563	0.642597973	SORBI_3006G230400
LOC8068438	Zm00001d002167	M1		0.332935538	0.332196408	0.914352458	0.946996534	0.631620235	SORBI_3006G230300
LOC110436539	Zm00001d002172	M1		0.629703771	0.629703771	0.18933128	0.182552518	0.407822835	SORBI_3006G229600
LOC8066853	Zm00001d002175	M1		0.772105557	0.769703386	0.889282505	0.868095666	0.824796779	SORBI_3006G228700
LOC8066834	Zm00001d002185	M1		0.949947068	0.95600639	0.988889745	0.988889745	0.970933237	SORBI_3006G225400
LOC8074753	Zm00001d002186	M1		0.902450292	0.897992416	0.901963804	0.897248962	0.899913869	SORBI_3006G226200
LOC8074754	Zm00001d002190	M1		0.992165996	0.992246838	0.992801951	0.990637549	0.991963084	SORBI_3006G226300
LOC8066850	Zm00001d002199	M1		0.105953458	0.109314188	0.69195592	0.725529457	0.408188256	SORBI_3006G228200
LOC8066824	Zm00001d002235	M1		0.939556907	0.950385926	0.976402972	0.981305352	0.961912789	SORBI_3006G223200
LOC110436533	Zm00001d002240	M1		0.993563413	0.991865725	0.927486131	0.974396098	0.971827842	SORBI_3006G222700
LOC8066815	Zm00001d002246	M1		0.960506612	0.966350355	0.805715997	0.790938262	0.880877807	SORBI_3006G222100
LOC8066805	Zm00001d002258	M1		0.867480223	0.861563336	0.89351531	0.886180025	0.877184723	SORBI_3006G220800
LOC8066804	Zm00001d002259	M1		0.954997786	0.959340173	0.967791897	0.964879705	0.96175239	SORBI_3006G220700
LOC8066803	Zm00001d002260	M1		0.253829423	0.251519643	0.828689514	0.773053157	0.526772934	SORBI_3006G220600
LOC8074729	Zm00001d002261	M1		0.793521067	0.795561373	0.528028067	0.544384546	0.665373763	SORBI_3006G220500
LOC8074723	Zm00001d002274	M1		0.87705811	0.863645988	0.679091259	0.669783816	0.772394793	SORBI_3006G219500
LOC8066798	Zm00001d002275	M1		0.881739264	0.890566474	0.870314751	0.886901553	0.88238051	SORBI_3006G219300
LOC8066797	Zm00001d002277	M1		0.821619541	0.840675226	0.758835694	0.723672614	0.786200768	SORBI_3006G219200
LOC8074720	Zm00001d002282	M1		0.924705022	0.915323465	0.511124558	0.516094069	0.716811778	SORBI_3006G218900
LOC8066793	Zm00001d002287	M1		0.639223914	0.540484669	0.600876469	0.573345313	0.588482591	SORBI_3006G217900
LOC8074711	Zm00001d002296	M1		0.902796759	0.896221585	0.884374278	0.871535532	0.888732038	SORBI_3006G217000
LOC8074710	Zm00001d002301	M1		0.752703405	0.761426674	0.807146708	0.795100574	0.77909434	SORBI_3006G216900
LOC8074702	Zm00001d002314	M1		0.692456644	0.686670645	0.729779783	0.721533393	0.707610116	SORBI_3006G215300
LOC110436524	Zm00001d002317	M1		0.967782419	0.968933459	0.839729603	0.761853421	0.884574725	SORBI_3006G214700
LOC8072340	Zm00001d002334	M1		0.910522973	0.910522973	0.962418175	0.973405211	0.939217333	SORBI_3006G213400
LOC8072335	Zm00001d002340	M1		0.927572999	0.942089966	0.956231549	0.96111539	0.946752476	SORBI_3006G212900
LOC8072332	Zm00001d002342	M1		0.95212596	0.944850153	0.981727634	0.969112509	0.961954064	SORBI_3006G212400
LOC8063958	Zm00001d002345	M1		0.931407233	0.916774777	0.923144939	0.950167572	0.930373631	SORBI_3006G212000
LOC8072330	Zm00001d002346	M1		0.596927993	0.569014301	0.937918111	0.989904102	0.773441127	SORBI_3006G211900
LOC8063956	Zm00001d002349	M1		0.80692549	0.810309318	0.849280305	0.817284901	0.820950004	SORBI_3006G211500
LOC8063952	Zm00001d002353	M1		0.94729852	0.979750929	0.939345399	0.924175331	0.947642544	SORBI_3006G211000
LOC8063951	Zm00001d002357	M1		0.476896426	0.494585491	0.644005904	0.700720612	0.579052108	SORBI_3006G210900
LOC8072324	Zm00001d002359	M1		0.951723459	0.939068004	0.931356694	0.938351945	0.940125025	SORBI_3006G210700
LOC8063948	Zm00001d002362	M1		0.987966046	0.987966046	0.979243857	0.980156591	0.983833135	SORBI_3006G210400
LOC8072318	Zm00001d002366	M1		0.933632322	0.931403384	0.941541522	0.908663843	0.928810268	SORBI_3006G209500
LOC8072313	Zm00001d002372	M1		0.629753816	0.664219583	0.684369144	0.724855603	0.675799536	SORBI_3006G208800
LOC8072310	Zm00001d002377	M1		0.782022212	0.76567282	0.519839131	0.572118827	0.659913247	SORBI_3006G208200
LOC8072306	Zm00001d002384	M1		0.991041903	0.992262237	0.967064562	0.954545843	0.976228636	SORBI_3006G207800
LOC8063937	Zm00001d002385	M1		0.939872577	0.915739226	0.827672956	0.838563014	0.880461943	SORBI_3006G207700
LOC8072302	Zm00001d002390	M1		0.938663792	0.935972899	0.95670503	0.967403414	0.949686284	SORBI_3006G207300
LOC8063935	Zm00001d002402	M1		0.60336458	0.556275865	0.70666795	0.691838568	0.639536741	SORBI_3006G206700
LOC8072297	Zm00001d002403	M1		0.875391219	0.876873328	0.862674881	0.860074445	0.868753468	SORBI_3006G206600
LOC8072294	Zm00001d002406	M1		0.841820705	0.842049545	0.609509141	0.559799769	0.71329479	SORBI_3006G205800
LOC8072288	Zm00001d002415	M1		0.873681982	0.860550883	0.724180322	0.684102169	0.785628839	SORBI_3006G205200
LOC8072283	Zm00001d002419	M1		0.941858988	0.935322311	0.887375543	0.91092286	0.918869925	SORBI_3006G204800
LOC8072284	Zm00001d002420	M1		0.683968202	0.670679268	0.766320113	0.77626321	0.724307698	SORBI_3006G204700
LOC8063926	Zm00001d002421	M1		0.982214694	0.982214694	0.983917341	0.980197664	0.982136098	SORBI_3006G204600
LOC8072282	Zm00001d002422	M1		0.80451177	0.754882297	0.932777136	0.949537928	0.860427283	SORBI_3006G204500
LOC8072281	Zm00001d002423	M1		0.865012608	0.866052009	0.895670829	0.888432522	0.878791992	SORBI_3006G204400
LOC110436335	Zm00001d002426	M1		0.991366128	0.992885878	0.961297223	0.969751423	0.978825163	SORBI_3006G204000
LOC8063922	Zm00001d002428	M1		0.780389968	0.80220199	0.609061738	0.646147264	0.70945024	SORBI_3006G203600
LOC8072147	Zm00001d002433	M1		0.892129425	0.888237445	0.969362084	0.970156448	0.929971351	SORBI_3006G203100
LOC8071110	Zm00001d002434	M1		0.996604623	0.995519027	0.88714899	0.983257605	0.965632561	SORBI_3006G203000
LOC8063921	Zm00001d002436	M1		0.893904106	0.8971147	0.884261327	0.953005605	0.907071434	SORBI_3006G202500
LOC8063920	Zm00001d002439	M1		0.647335091	0.626362289	0.858931245	0.792247465	0.731219023	SORBI_3006G202300
LOC8063919	Zm00001d002440	M1		0.977764518	0.971693646	0.97533051	0.985349396	0.977534517	SORBI_3006G202200
LOC8071108	Zm00001d002441	M1		0.600038496	0.606748407	0.695833654	0.70192102	0.651135394	SORBI_3006G201900
LOC8063913	Zm00001d002447	M1		0.71747926	0.666864281	0.563971249	0.516105478	0.616105067	SORBI_3006G201700
LOC8071104	Zm00001d002454	M1		0.956656978	0.95832002	0.973111425	0.975147148	0.965808893	SORBI_3006G200800
LOC8063901	Zm00001d002478	M1		0.929174446	0.895239928	0.936736527	0.929190091	0.922585248	SORBI_3006G199200
LOC8071081	Zm00001d002490	M1		0.976290108	0.977995496	0.97202413	0.963915629	0.972556341	SORBI_3006G197700
LOC8060470	Zm00001d002491	M1		0.844698093	0.852967105	0.839795205	0.886407393	0.855966949	SORBI_3006G197600
LOC8060461	Zm00001d002499	M1		0.956668527	0.946513195	0.92873187	0.927754246	0.93991696	SORBI_3006G196300
LOC8071075	Zm00001d002500	M1		0.439212365	0.4992089	0.701636504	0.724791426	0.591212299	SORBI_3006G196200
LOC8060460	Zm00001d002501	M1		0.724212269	0.742979231	0.879213908	0.882505455	0.807227716	SORBI_3006G196000
LOC8060458	Zm00001d002504	M1		0.899655458	0.912624872	0.939404441	0.95199304	0.925919453	SORBI_3006G195700
LOC8071074	Zm00001d002510	M1		0.99296672	0.982434123	0.986323964	0.99761263	0.989834359	SORBI_3006G195500
LOC8060456	Zm00001d002512	M1		0.586610975	0.625981175	0.703515045	0.651660341	0.641941884	SORBI_3006G195400
LOC8060455	Zm00001d002514	M1		0.501129867	0.527299675	0.678521371	0.666495529	0.59336161	SORBI_3006G195200
LOC8057706	Zm00001d002531	M1		0.521105615	0.528373722	0.540867668	0.471766568	0.515528393	SORBI_3006G193400
LOC8057705	Zm00001d002532	M1		0.300760303	0.279025273	0.874664906	0.883622128	0.584518152	SORBI_3006G193200
LOC8057701	Zm00001d002534	M1		0.886589802	0.859472985	0.86926582	0.962022847	0.894337863	SORBI_3006G193100
LOC8057700	Zm00001d002536	M1		0.765826805	0.806267203	0.8952689	0.894115004	0.840369478	SORBI_3006G192900
LOC8057699	Zm00001d002538	M1		0.963178257	0.963209054	0.972795533	0.952719805	0.962975662	SORBI_3006G192700
LOC8060444	Zm00001d002539	M1		0.895570997	0.897892326	0.828739714	0.823291832	0.861373717	SORBI_3006G192600
LOC8057698	Zm00001d002541	M1		0.27748542	0.296452563	0.577812005	0.542433577	0.423545891	SORBI_3006G192400
LOC8057697	Zm00001d002542	M1		0.699274344	0.647277347	0.625242802	0.603579629	0.64384353	SORBI_3006G192200
LOC8057696	Zm00001d002544	M1		0.829164822	0.877083347	0.730906031	0.703591323	0.785186381	SORBI_3006G191900
LOC110436337	Zm00001d002550	M1		0.970985314	0.972559814	0.982554963	0.98584977	0.977987465	SORBI_3006G191500
LOC8057689	Zm00001d002558	M1		0.224703097	0.231602495	0.609337697	0.658263809	0.430976775	SORBI_3006G190600
LOC8060429	Zm00001d002580	M1		0.956406752	0.950204993	0.894339623	0.894269028	0.923805099	SORBI_3006G188500
LOC110436549	Zm00001d002584	M1		0.988440407	0.985737109	0.928615639	0.935499936	0.959573273	SORBI_3006G188400
LOC8060427	Zm00001d002590	M1		0.861867457	0.807445191	0.984098461	0.985667223	0.909769583	SORBI_3006G188100
LOC8057617	Zm00001d002591	M1		0.950693896	0.92619098	0.981154894	0.97816895	0.95905218	SORBI_3006G188000
LOC8060426	Zm00001d002593	M1		0.625985025	0.625800243	0.624618149	0.625503786	0.625476801	SORBI_3006G187800
LOC8060425	Zm00001d002595	M1		0.614921179	0.614921179	0.872586318	0.872586318	0.743753748	SORBI_3006G187500
LOC8060422	Zm00001d002597	M1		0.62403711	0.64272708	0.73649724	0.730548068	0.683452375	SORBI_3006G187200
LOC110436522	Zm00001d002598	M1		0.854761034	0.851434951	0.953373551	0.948068284	0.901909455	SORBI_3006G187100
LOC8057614	Zm00001d002601	M1		0.920027717	0.933659269	0.891169298	0.975595773	0.930113014	SORBI_3006G186700
LOC8060419	Zm00001d002602	M1		0.835501318	0.835501318	0.879197609	0.840925427	0.847781418	SORBI_3006G186600
LOC8060418	Zm00001d002607	M1		0.855511713	0.847581468	0.923828777	0.902968627	0.882472646	SORBI_3006G186300
LOC110436528	Zm00001d002615	M1		0.957511597	0.9637788	0.922160185	0.924713701	0.942041071	SORBI_3006G185100
LOC8060410	Zm00001d002617	M1		0.999222374	0.999210825	0.995896364	0.995991712	0.997580319	SORBI_3006G184900
LOC8060407	Zm00001d002621	M1		0.860169769	0.849683368	0.755047847	0.74694391	0.802961223	SORBI_3006G184500
LOC8057608	Zm00001d002624	M1		0.752984428	0.728031105	0.678218457	0.647272494	0.701626621	SORBI_3006G184200
LOC8060404	Zm00001d002631	M1		0.942028372	0.895401613	0.872168742	0.862857143	0.893113967	SORBI_3006G183500
LOC8060403	Zm00001d002632	M1		0.922433738	0.931595865	0.912751893	0.933120634	0.924975533	SORBI_3006G183400
LOC8056615	Zm00001d002640	M1		0.973310492	0.966250265	0.974822801	0.974201001	0.97214614	SORBI_3006G182900
LOC8057600	Zm00001d002641	M1		0.752376186	0.726433507	0.758655592	0.708646729	0.736528004	SORBI_3006G182500
LOC110436393	Zm00001d002656	M1		0.990934114	0.989559794	0.954031208	0.949197792	0.970930727	SORBI_3006G180700
LOC8056605	Zm00001d002658	M1		0.776070679	0.776070679	0.759953793	0.70875369	0.75521221	SORBI_3006G179900
LOC110436389	Zm00001d002659	M1		0.992316132	0.996169615	0.94931331	0.926974348	0.966193351	SORBI_3006G179800
LOC8056604	Zm00001d002661	M1		0.703435798	0.675002406	0.331635403	0.378975741	0.522262337	SORBI_3006G179600
LOC8057579	Zm00001d002663	M1		0.9648336	0.947968356	0.957694776	0.955641124	0.956534464	SORBI_3006G179100
LOC8057578	Zm00001d002668	M1		0.796227359	0.787850557	0.886656765	0.888541724	0.839819101	SORBI_3006G179000
LOC8056600	Zm00001d002676	M1		0.978357361	0.976682771	0.988545758	0.977091516	0.980169352	SORBI_3006G178100
LOC8056599	Zm00001d002677	M1		0.87632283	0.886901623	0.825972276	0.874188166	0.865846224	SORBI_3006G178000
LOC8056598	Zm00001d002678	M1		0.620849614	0.566900853	0.166634578	0.183788987	0.384543508	SORBI_3006G177800
LOC8057567	Zm00001d002680	M1		0.965160818	0.968690932	0.929421127	0.928541479	0.947953589	SORBI_3006G177400
LOC8057566	Zm00001d002684	M1		0.861563336	0.857440379	0.945204581	0.952505638	0.904178484	SORBI_3006G177200
LOC8057565	Zm00001d002685	M1		0.778838566	0.759363271	0.786474422	0.800176027	0.781213071	SORBI_3006G177100
LOC8064644	Zm00001d002687	M1		0.968151984	0.969183685	0.965005776	0.983020294	0.971340435	SORBI_3006G177000
LOC8056594	Zm00001d002688	M1		0.902831405	0.900375339	0.994189877	0.981876524	0.944818286	SORBI_3006G176800
LOC8064643	Zm00001d002690	M1		0.939306253	0.947394761	0.914373728	0.941875241	0.935737496	SORBI_3006G176700
LOC8064642	Zm00001d002694	M1		0.850464843	0.857101611	0.923495058	0.949711205	0.895193179	SORBI_3006G176600
LOC8056593	Zm00001d002695	M1		0.71989683	0.686555156	0.749850968	0.741222778	0.724381433	SORBI_3006G176500
LOC8064641	Zm00001d002696	M1		0.881746964	0.867946028	0.398733581	0.548831069	0.674314411	SORBI_3006G176400
LOC8054096	Zm00001d002705	M1		0.790926414	0.753407888	0.812277903	0.682947561	0.759889941	SORBI_3006G173800
LOC8055978	Zm00001d002708	M1		0.774230555	0.809273767	0.703587473	0.69043035	0.744380536	SORBI_3006G173700
LOC110436334	Zm00001d002711	M1		0.884815121	0.900344542	0.683679887	0.559876781	0.757179083	SORBI_3006G173600
LOC8083384	Zm00001d002715	M1		0.995176409	0.994491175	0.990048346	0.97884097	0.989639225	SORBI_3006G173200
LOC8055974	Zm00001d002716	M1		0.974900391	0.976424846	0.967500963	0.951148761	0.96749374	SORBI_3006G173100
LOC8055969	Zm00001d002726	M1		0.799395608	0.786287606	0.949146451	0.952603431	0.871858274	SORBI_3006G172000
LOC8055968	Zm00001d002727	M1		0.713021385	0.696768233	0.907380311	0.893800539	0.802742617	SORBI_3006G171900
LOC8083376	Zm00001d002730	M1		0.701476334	0.706238331	0.890023287	0.900077012	0.799453741	SORBI_3006G171700
LOC8083373	Zm00001d002733	M1		0.933216561	0.925963852	0.949420271	0.949923905	0.939631147	SORBI_3006G171400
LOC8083366	Zm00001d002734	M1		0.955863954	0.959909919	0.941539383	0.914190366	0.942875905	SORBI_3006G170200
LOC8083369	Zm00001d002742	M1		0.918245337	0.911997382	0.764279297	0.740757855	0.833819968	SORBI_3006G170900
LOC110436579	Zm00001d002751	M1		0.834535061	0.840998595	0.86163522	0.86049471	0.849415896	SORBI_3006G169500
LOC8083360	Zm00001d002754	M1		0.73763594	0.71086174	0.47705301	0.468757398	0.598577022	SORBI_3006G169200
LOC8055960	Zm00001d002756	M1		0.50108966	0.496575751	0.571325889	0.596380439	0.541342935	SORBI_3006G168900
LOC8083352	Zm00001d002759	M1		0.725320963	0.752160607	0.758071279	0.687806443	0.730839823	SORBI_3006G168300
LOC8055953	Zm00001d002770	M1		0.982303236	0.987669624	0.911404897	0.912822487	0.948550061	SORBI_3006G167500
LOC8055929	Zm00001d002775	M1		0.933655419	0.927311224	0.614389823	0.602724756	0.769520305	SORBI_3006G164400
LOC110436372	Zm00001d002778	M1		0.90173041	0.905083441	0.938544474	0.942882814	0.922060285	SORBI_3006G164900
LOC8055936	Zm00001d002787	M1		0.887194195	0.889677208	0.954751209	0.956479699	0.922025578	SORBI_3006G165800
LOC8055940	Zm00001d002789	M1		0.980848074	0.980848074	0.995496228	0.9948402	0.988008144	SORBI_3006G166000
LOC8055942	Zm00001d002791	M1		0.958266125	0.973614613	0.930391477	0.926984127	0.947314086	SORBI_3006G166200
LOC8083330	Zm00001d002814	M1		0.485681289	0.485681289	0.29709665	0.334224471	0.400670925	SORBI_3006G162300
LOC8058346	Zm00001d002823	M1		0.973897347	0.980428464	0.971622527	0.974437171	0.975096378	SORBI_3006G161400
LOC8083326	Zm00001d002824	M1		0.825923431	0.845575809	0.685232961	0.714510332	0.767810633	SORBI_3006G161300
LOC8083325	Zm00001d002825	M1		0.858741555	0.866843322	0.730442819	0.677589526	0.783404305	SORBI_3006G161200
LOC8083322	Zm00001d002833	M1		0.611317922	0.654172468	0.682294956	0.751525264	0.674827652	SORBI_3006G160500
LOC8058341	Zm00001d002834	M1		0.90824399	0.905621962	0.945866313	0.890712727	0.912611248	SORBI_3006G160400
LOC8083319	Zm00001d002835	M1		0.663992455	0.653971859	0.834890075	0.820861678	0.743429017	SORBI_3006G160000
LOC8083318	Zm00001d002836	M1		0.680380344	0.680380344	0.829411225	0.842043383	0.758053824	SORBI_3006G159900
LOC110436204	Zm00001d002837	M1		0.713098377	0.68210113	0.759756985	0.675497369	0.707613465	SORBI_3006G159600
LOC8082880	Zm00001d002850	M1		0.662953054	0.663149385	0.743094596	0.689083558	0.689570148	SORBI_3006G157900
LOC8056043	Zm00001d002853	M1		0.931746001	0.951001867	0.725013192	0.714949484	0.830677636	SORBI_3006G157700
LOC8056042	Zm00001d002854	M1		0.882824861	0.858799299	0.757114619	0.758832841	0.814392905	SORBI_3006G157600
LOC110436525	Zm00001d002857	M1		0.976767463	0.970353974	0.958071279	0.954873857	0.965016643	SORBI_3006G157300
LOC8082875	Zm00001d002859	M1		0.774002998	0.789200495	0.704870292	0.686956745	0.738757633	SORBI_3006G157100
LOC8082874	Zm00001d002860	M1		0.448701711	0.46393471	0.747948488	0.74931331	0.602474555	SORBI_3006G157000
LOC8082873	Zm00001d002864	M1		0.865959617	0.897183993	0.925413939	0.896333376	0.896222731	SORBI_3006G156600
LOC8056035	Zm00001d002868	M1		0.894751025	0.884664986	0.971576891	0.968678145	0.929917762	SORBI_3006G156000
LOC8082867	Zm00001d002871	M1		0.949831579	0.880719112	0.960123219	0.923981884	0.928663948	SORBI_3006G155700
LOC8056033	Zm00001d002873	M1		0.988216272	0.990814775	0.829183857	0.864033999	0.918062226	SORBI_3006G155500
LOC8076503	Zm00001d002876	M1		0.930891383	0.926460455	0.828397439	0.786112181	0.867965364	SORBI_3006G275500
LOC8055455	Zm00001d002878	M1		0.935868958	0.944118723	0.88734865	0.881427288	0.912190905	SORBI_3006G275600
LOC8055462	Zm00001d002890	M1		0.872727273	0.87800127	0.678739205	0.650115518	0.769895816	SORBI_3006G276900
LOC8076507	Zm00001d002891	M1		0.584655362	0.586953593	0.880437134	0.866789886	0.729708994	SORBI_3006G277000
LOC8055463	Zm00001d002893	M1		0.593436375	0.46277982	0.383981517	0.418607551	0.464701316	SORBI_3006G277100
LOC8076508	Zm00001d002896	M1		0.866236791	0.830904856	0.798078369	0.778552176	0.818443048	SORBI_3006G277200
LOC8055466	Zm00001d002899	M1		0.66414259	0.682759417	0.746913105	0.789433962	0.720812269	SORBI_3006G277600
LOC8055470	Zm00001d002905	M1		0.799930707	0.800565896	0.933531364	0.929534078	0.865890511	SORBI_3006G278000
LOC8076511	Zm00001d002917	M1		0.096683541	0.093426751	0.708370464	0.671306636	0.392446848	SORBI_3006G278200
LOC110436309	Zm00001d002919	M1		0.990075645	0.983627509	0.981249427	0.987344372	0.985574238	SORBI_3006G278700
LOC8076515	Zm00001d002928	M1		0.58330799	0.608781014	0.408894879	0.44139249	0.510594093	SORBI_3006G278800
LOC8055473	Zm00001d002934	M1		0.604350086	0.57827267	0.518675395	0.569009113	0.567576816	SORBI_3006G279400
LOC8076522	Zm00001d002938	M1		0.980740284	0.973591515	0.941573611	0.947285329	0.960797685	SORBI_3006G280100
LOC8064299	Zm00001d002939	M1		0.970134545	0.947394761	0.805962007	0.853412057	0.894225842	SORBI_3006G280300
LOC8076524	Zm00001d002941	M1		0.665008758	0.661848209	0.687716596	0.71811064	0.683171051	SORBI_3006G280500
LOC8064300	Zm00001d002942	M1		0.896544954	0.904994899	0.930935695	0.928832413	0.91532699	SORBI_3006G280600
LOC8064302	Zm00001d002943	M1		0.801378169	0.813881778	0.854223738	0.890866751	0.840087609	SORBI_3006G281000
LOC110436375	Zm00001d002944	M1		0.991261332	0.992493215	0.991419587	0.989361351	0.991133871	SORBI_3006G282200
LOC8064306	Zm00001d002945	M1		0.942959983	0.937578196	0.612501604	0.580740598	0.768445095	SORBI_3006G281900
LOC8076529	Zm00001d002946	M1		0.965838354	0.954551229	0.974846435	0.975567963	0.967700995	SORBI_3006G281700
LOC8064303	Zm00001d002950	M1		0.962408331	0.97438839	0.843239635	0.814996791	0.898758287	SORBI_3006G281400
LOC8082862	Zm00001d002953	M1		0.951209747	0.968044194	0.988349194	0.988429873	0.974008252	SORBI_3006G155100
LOC8082859	Zm00001d002961	M1		0.779824072	0.779824072	0.916924657	0.917853934	0.848606684	SORBI_3006G154100
LOC8056026	Zm00001d002965	M1		0.211953111	0.221700383	0.323822359	0.354545843	0.278005424	SORBI_3006G153600
LOC8082856	Zm00001d002966	M1		0.805281697	0.800569746	0.703925775	0.742632525	0.763102436	SORBI_3006G153500
LOC8082854	Zm00001d002968	M1		0.827532578	0.827990684	0.818335259	0.788272182	0.815532676	SORBI_3006G153300
LOC8056024	Zm00001d002970	M1		0.467869035	0.455469367	0.450705943	0.518405853	0.473112549	SORBI_3006G153100
LOC8082853	Zm00001d002971	M1		0.923403846	0.923403846	0.977270069	0.973328199	0.94935149	SORBI_3006G153000
LOC8082844	Zm00001d002992	M1		0.65753662	0.672134429	0.853520444	0.818908264	0.750524939	SORBI_3006G151200
LOC8082843	Zm00001d002993	M1		0.938013204	0.925702077	0.980423566	0.980190818	0.956082416	SORBI_3006G151100
LOC8075944	Zm00001d003002	M1		0.675040902	0.64136431	0.944708282	0.938279211	0.799848176	SORBI_3006G150600
LOC8075942	Zm00001d003004	M1		0.442469155	0.417900795	0.392215377	0.418739571	0.417831224	SORBI_3006G150300
LOC8075941	Zm00001d003005	M1		0.575489385	0.58960984	0.684405083	0.732338596	0.645460726	SORBI_3006G150200
LOC8075940	Zm00001d003006	M1		0.779020354	0.712432391	0.758068834	0.790983186	0.760126191	SORBI_3006G150100
LOC8056017	Zm00001d003007	M1		0.89647951	0.89647951	0.840302914	0.853908356	0.871792573	SORBI_3006G149800
LOC8054283	Zm00001d003015	M1		0.878571016	0.88220507	0.850417148	0.931681855	0.885718772	SORBI_3006G148900
LOC8054282	Zm00001d003016	M1		0.871653225	0.939368275	0.984398665	0.9840842	0.944876091	SORBI_3006G148800
LOC8075936	Zm00001d003017	M1		0.590934114	0.580089696	0.823771018	0.824175331	0.70474254	SORBI_3006G148700
LOC8054280	Zm00001d003021	M1		0.794341039	0.84661906	0.583470957	0.580451803	0.701220715	SORBI_3006G148500
LOC8075922	Zm00001d003031	M1		0.998082883	0.997324505	0.998485432	0.997991272	0.997971023	SORBI_3006G143200
LOC8064463	Zm00001d003033	M1		0.926910862	0.927653841	0.828545758	0.840245868	0.880839082	SORBI_3006G143300
LOC8064464	Zm00001d003034	M1		0.841664581	0.800989356	0.937374626	0.944885124	0.881228422	SORBI_3006G143500
LOC8075923	Zm00001d003035	M1		0.816888341	0.78383154	0.935253498	0.918803748	0.863694282	SORBI_3006G143400
LOC8064468	Zm00001d003038	M1		0.950074105	0.937732181	0.99047619	0.986872032	0.966288627	SORBI_3006G144300
LOC8064470	Zm00001d003039	M1		0.975678017	0.955767713	0.948047747	0.869233731	0.937181802	SORBI_3006G144600
LOC8064471	Zm00001d003040	M1		0.994310242	0.995087868	0.872185855	0.86673341	0.932079344	SORBI_3006G144700
LOC8075929	Zm00001d003047	M1		0.930402479	0.91517333	0.853959697	0.842905917	0.885610356	SORBI_3006G146400
LOC8068630	Zm00001d003048	M1		0.961222644	0.976557872	0.991908042	0.996859624	0.981637045	SORBI_3006G146500
LOC8054272	Zm00001d003050	M1		0.881658422	0.881658422	0.851620816	0.822722189	0.859414962	SORBI_3006G146900
LOC8075932	Zm00001d003062	M1		0.921621466	0.955351953	0.782056219	0.746815556	0.851461298	SORBI_3006G147900
LOC8054278	Zm00001d003066	M1		0.877335284	0.894034993	0.939220468	0.925433192	0.909005984	SORBI_3006G148100
LOC8075934	Zm00001d003068	M1		0.609246819	0.566935499	0.532242331	0.499940958	0.552091402	SORBI_3006G148300
LOC8075918	Zm00001d003071	M1		0.833999962	0.817030778	0.949833141	0.957572127	0.889609002	SORBI_3006G142700
LOC8064458	Zm00001d003072	M1		0.890516428	0.87193767	0.883949429	0.933421347	0.894956219	SORBI_3006G142500
LOC8064457	Zm00001d003076	M1		0.943637519	0.975801205	0.97200066	0.968418688	0.964964518	SORBI_3006G142400
LOC8075910	Zm00001d003081	M1		0.969726484	0.981460166	0.856258646	0.85841172	0.916464254	SORBI_3006G141700
LOC8075909	Zm00001d003083	M1		0.916243528	0.874351818	0.969944808	0.973966298	0.933626613	SORBI_3006G141600
LOC110436602	Zm00001d003086	M1		0.444324678	0.502754413	0.854832499	0.856231549	0.664535785	SORBI_3006G140700
LOC8060225	Zm00001d003088	M1		0.908459569	0.922614671	0.962253149	0.957889139	0.937804132	SORBI_3006G140500
LOC8060222	Zm00001d003099	M1		0.719761665	0.673027544	0.610704659	0.642393645	0.661471878	SORBI_3006G140100
LOC8060221	Zm00001d003102	M1		0.485962312	0.541231498	0.810696102	0.728620936	0.641627712	SORBI_3006G139900
LOC8075898	Zm00001d003108	M1		0.585883395	0.58183358	0.379726608	0.438814016	0.4965644	SORBI_3006G138800
LOC110436308	Zm00001d003109	M1		0.966662175	0.966662175	0.965592778	0.968181235	0.966774591	SORBI_3006G138600
LOC8075897	Zm00001d003112	M1		0.959216985	0.923307605	0.949178539	0.954932615	0.946658936	SORBI_3006G138400
LOC8060216	Zm00001d003116	M1		0.574738706	0.550370527	0.822092158	0.867488127	0.70367238	SORBI_3006G138200
LOC8075895	Zm00001d003118	M1		0.500179008	0.513056031	0.964914645	0.963077055	0.735306685	SORBI_3006G138100
LOC8060215	Zm00001d003119	M1		0.998760418	0.999079938	0.997509947	0.99782533	0.998293908	SORBI_3006G138000
LOC8075891	Zm00001d003125	M1		0.687779339	0.692310357	0.851737353	0.791739757	0.755891701	SORBI_3006G137200
LOC8075889	Zm00001d003129	M1		0.947067542	0.957553943	0.546818979	0.464317803	0.728939567	SORBI_3006G136800
LOC8060211	Zm00001d003140	M1		0.410043693	0.365191615	0.573774868	0.543176192	0.473046592	SORBI_3006G136500
LOC8075887	Zm00001d003148	M1		0.529228341	0.50163032	0.635304472	0.733718393	0.599970381	SORBI_3006G136200
LOC8060209	Zm00001d003149	M1		0.524166073	0.53428291	0.764750536	0.707560005	0.632689881	SORBI_3006G136100
LOC8075886	Zm00001d003151	M1		0.477570111	0.488845687	0.552175587	0.568681812	0.5218183	SORBI_3006G136000
LOC8075879	Zm00001d003161	M1		0.852655285	0.849302254	0.912011295	0.947178368	0.8902868	SORBI_3006G135200
LOC8060204	Zm00001d003164	M1		0.997031933	0.997389949	0.997099217	0.997586959	0.997277014	SORBI_3006G134900
LOC8060201	Zm00001d003166	M1		0.923446192	0.919912228	0.910772503	0.929578085	0.920927252	SORBI_3006G134500
LOC8075875	Zm00001d003180	M1		0.942301696	0.944338152	0.756843977	0.67554871	0.829758134	SORBI_3006G133700
LOC8075874	Zm00001d003181	M1		0.994402633	0.994602814	0.979155436	0.980992721	0.987288401	SORBI_3006G133600
LOC8083725	Zm00001d003182	M1		0.898458222	0.905957308	0.573841612	0.611907512	0.747541163	SORBI_3006G133500
LOC8073714	Zm00001d003195	M1		0.951017266	0.928181241	0.881872246	0.837096935	0.899541922	SORBI_3006G131800
LOC8073713	Zm00001d003196	M1		0.862833715	0.862787519	0.817319129	0.818209045	0.840287352	SORBI_3006G131700
LOC8073712	Zm00001d003197	M1		0.977202471	0.93973784	0.801185984	0.762597869	0.870181041	SORBI_3006G131600
LOC8073711	Zm00001d003198	M1		0.903615875	0.905580044	0.965965858	0.967857499	0.935754819	SORBI_3006G131500
LOC8073709	Zm00001d003203	M1		0.985244355	0.990372067	0.971736619	0.969055463	0.979102126	SORBI_3006G131200
LOC8060180	Zm00001d003212	M1		0.870155718	0.867330087	0.863731656	0.889575884	0.872698336	SORBI_3006G130000
LOC8073703	Zm00001d003213	M1		0.960606702	0.961005353	0.483900227	0.420750439	0.70656568	SORBI_3006G129800
LOC8073702	Zm00001d003214	M1		0.910584567	0.909949377	0.901880375	0.937154592	0.914892228	SORBI_3006G129700
LOC8060177	Zm00001d003223	M1		0.84714261	0.857598214	0.687748684	0.73030053	0.780697509	SORBI_3006G128800
LOC110436244	Zm00001d003224	M1		0.945596982	0.940769542	0.800467206	0.825888846	0.878180644	SORBI_3006G128300
LOC8073695	Zm00001d003227	M1		0.986699517	0.986699517	0.954463127	0.988542335	0.979101124	SORBI_3006G128400
LOC110436107	Zm00001d003242	M1		0.951188788	0.948503455	0.887654253	0.895004207	0.920587676	SORBI_3006G127500
LOC8060170	Zm00001d003246	M1		0.937913114	0.921771601	0.866030605	0.886480738	0.903049014	SORBI_3006G127200
LOC8073689	Zm00001d003247	M1		0.907185341	0.827116817	0.619817738	0.60485817	0.739744516	SORBI_3006G127100
LOC110436319	Zm00001d003252	M1		0.754624372	0.724635728	0.795048418	0.837504813	0.777953333	SORBI_3006G126300
LOC110436538	Zm00001d003257	M1		0.973052567	0.970380921	0.970071694	0.956051855	0.967389259	SORBI_3006G126000
LOC110436571	Zm00001d003259	M1		0.985456085	0.986815006	0.997412399	0.997196195	0.991719921	SORBI_3006G125700
LOC8060161	Zm00001d003262	M1		0.87538352	0.893573037	0.931565726	0.931318188	0.907960118	SORBI_3006G125400
LOC8073676	Zm00001d003265	M1		0.929147499	0.902900699	0.918231659	0.898729303	0.91225229	SORBI_3006G124900
LOC8060155	Zm00001d003268	M1		0.945666275	0.941269994	0.929956217	0.916347923	0.933310102	SORBI_3006G124300
LOC8058729	Zm00001d003275	M1		0.694054241	0.684060593	0.902334603	0.91599923	0.799112167	SORBI_3006G122600
LOC8058730	Zm00001d003276	M1		0.942344042	0.949334976	0.938606084	0.941120096	0.942851299	SORBI_3006G122500
LOC8073595	Zm00001d003277	M1		0.5123323	0.495905915	0.411660891	0.423029421	0.460732132	SORBI_3006G122400
LOC8073594	Zm00001d003281	M1		0.827463284	0.757937195	0.907537187	0.92374278	0.854170112	SORBI_3006G122300
LOC8058721	Zm00001d003284	M1		0.925082286	0.921228803	0.952909034	0.951500816	0.937680235	SORBI_3006G121300
LOC8073590	Zm00001d003287	M1		0.882878756	0.907050603	0.574180465	0.604132974	0.742060699	SORBI_3006G121200
LOC8058717	Zm00001d003292	M1		0.707162243	0.651681327	0.783211398	0.822288538	0.741085876	SORBI_3006G120500
LOC8058713	Zm00001d003294	M1		0.84042115	0.840425	0.891906616	0.898915415	0.867917045	SORBI_3006G120200
LOC8058712	Zm00001d003297	M1		0.469370392	0.474698285	0.548986009	0.43924186	0.483074137	SORBI_3006G120000
LOC8073583	Zm00001d003301	M1		0.618751564	0.565645872	0.768204338	0.814852302	0.691863519	SORBI_3006G119600
LOC8073582	Zm00001d003302	M1		0.971054607	0.959001405	0.968393018	0.966976548	0.966356394	SORBI_3006G119400
LOC8058711	Zm00001d003308	M1		0.971139299	0.972013166	0.86307791	0.842619689	0.912212516	SORBI_3006G119300
LOC8073581	Zm00001d003309	M1		0.768182781	0.770892922	0.618649724	0.6427981	0.700130882	SORBI_3006G119200
LOC8058709	Zm00001d003311	M1		0.430050238	0.405508825	0.544263324	0.489612557	0.467358736	SORBI_3006G118400
LOC8073575	Zm00001d003313	M1		0.82403711	0.833064501	0.912996477	0.920594989	0.872673269	SORBI_3006G118300
LOC8073574	Zm00001d003314	M1		0.970303929	0.969988259	0.938478872	0.930235742	0.9522517	SORBI_3006G118000
LOC8058699	Zm00001d003319	M1		0.557950455	0.561642254	0.644399949	0.685750958	0.612435904	SORBI_3006G116900
LOC110436328	Zm00001d003322	M1		0.990603045	0.991322926	0.99761263	0.998049031	0.994396908	SORBI_3006G116500
LOC110436352	Zm00001d003345	M1		0.971786037	0.977379555	0.981943268	0.98660359	0.979428113	SORBI_3006G115000
LOC8058684	Zm00001d003349	M1		0.643862722	0.669208708	0.309476747	0.325549423	0.4870244	SORBI_3006G114600
LOC8058678	Zm00001d003354	M1		0.550955671	0.547987604	0.345357464	0.295171352	0.434868023	SORBI_3006G114100
LOC8058670	Zm00001d003365	M1		0.9107655	0.90046773	0.868520087	0.844095752	0.880962267	SORBI_3006G113000
LOC8058628	Zm00001d003368	M1		0.992450869	0.995145612	0.997018538	0.997759319	0.995593585	SORBI_3006G112800
LOC8073558	Zm00001d003372	M1		0.978022443	0.981402421	0.987436786	0.987436786	0.983574609	SORBI_3006G111800
LOC110436353	Zm00001d003373	M1		0.992743441	0.992458568	0.983950142	0.984306679	0.988364708	SORBI_3006G111600
LOC8073555	Zm00001d003376	M1		0.66540527	0.642068793	0.649711205	0.633788987	0.647743564	SORBI_3006G111300
LOC8073554	Zm00001d003378	M1		0.919407926	0.916944161	0.974406366	0.978449493	0.947301987	SORBI_3006G111200
LOC8057497	Zm00001d003379	M1		0.973984178	0.97407272	0.983190861	0.98175958	0.978251835	SORBI_3006G111100
LOC8073449	Zm00001d003380	M1		0.826797298	0.827663465	0.927860352	0.922440423	0.876190384	SORBI_3006G110850
LOC110436184	Zm00001d003381	M1		0.881800858	0.882670876	0.834289565	0.867287896	0.866512299	SORBI_3006G110700
LOC110436487	Zm00001d003392	M1		0.513979943	0.498019364	0.582569632	0.593402644	0.546992896	SORBI_3006G109850
LOC8073446	Zm00001d003394	M1		0.927823225	0.91381056	0.904244825	0.889340264	0.908804718	SORBI_3006G109300
LOC110436279	Zm00001d003395	M1		0.722160414	0.68220122	0.5935966	0.564073931	0.640508042	SORBI_3006G109100
LOC8073443	Zm00001d003400	M1		0.779092641	0.818343503	0.631659241	0.630676422	0.714942952	SORBI_3006G108500
LOC8073441	Zm00001d003404	M1		0.962396782	0.962573865	0.922469516	0.915495087	0.940733812	SORBI_3006G108200
LOC8057479	Zm00001d003406	M1		0.828298655	0.816686877	0.901946691	0.777666538	0.83114969	SORBI_3006G108000
LOC8057477	Zm00001d003414	M1		0.606170962	0.599148376	0.577942498	0.616643135	0.599976243	SORBI_3006G107400
LOC8057474	Zm00001d003415	M1		0.90184205	0.8960599	0.610841569	0.585459413	0.748550733	SORBI_3006G107200
LOC8073431	Zm00001d003422	M1		0.441687679	0.466744943	0.761930433	0.780471056	0.612708528	SORBI_3006G106700
LOC8073430	Zm00001d003423	M1		0.912309203	0.896856774	0.949344482	0.949133616	0.926911019	SORBI_3006G106600
LOC8073429	Zm00001d003425	M1		0.385048024	0.375866649	0.422808369	0.373908356	0.389407849	SORBI_3006G106500
LOC8057473	Zm00001d003426	M1		0.993948376	0.973579967	0.817935224	0.882885381	0.917087237	SORBI_3006G106400
LOC8057470	Zm00001d003428	M1		0.812765384	0.806860047	0.730050343	0.747785907	0.77436542	SORBI_3006G106000
LOC8057469	Zm00001d003430	M1		0.993702	0.948264778	0.90113721	0.808040046	0.912786008	SORBI_3006G105800
LOC8057464	Zm00001d003446	M1		0.578426655	0.62876446	0.528436658	0.500096265	0.558931009	SORBI_3006G104300
LOC8073418	Zm00001d003448	M1		0.839146921	0.837934287	0.852188423	0.865100757	0.848592597	SORBI_3006G104100
LOC8073411	Zm00001d003459	M1		0.989944758	0.992393125	0.994098604	0.994904377	0.992835216	SORBI_3006G103400
LOC8057460	Zm00001d003460	M1		0.992100552	0.984027871	0.952295384	0.948236977	0.969165196	SORBI_3006G103200
LOC110436666	Zm00001d003477	M1		0.916701634	0.916732431	0.84381694	0.84381694	0.880266986	SORBI_3006G101600
LOC8057448	Zm00001d003491	M1		0.971058457	0.974184359	0.86326714	0.874740085	0.92081251	SORBI_3006G100800
LOC110436307	Zm00001d003493	M1		0.732292649	0.734945046	0.804118712	0.85653703	0.781973359	SORBI_3006G100600
LOC8057443	Zm00001d003495	M1		0.554066175	0.616083768	0.719708638	0.751790528	0.660412277	SORBI_3006G100266
LOC8073397	Zm00001d003499	M1		0.912836602	0.867695802	0.919137466	0.890232319	0.897475547	SORBI_3006G100100
LOC8057442	Zm00001d003500	M1		0.793732797	0.807807056	0.956263638	0.928806743	0.871652558	SORBI_3006G100000
LOC8057441	Zm00001d003504	M1		0.915642985	0.812353473	0.923199846	0.908929106	0.890031353	SORBI_3006G099700
LOC8057437	Zm00001d003508	M1		0.619598483	0.646588262	0.864170909	0.864678618	0.748759068	SORBI_3006G098200
LOC8073385	Zm00001d003511	M1		0.786202914	0.788701326	0.939354933	0.931428571	0.861421936	SORBI_3006G097700
LOC8073378	Zm00001d003522	M1		0.950539911	0.949284931	0.998177384	0.998016943	0.974004792	SORBI_3006G096500
LOC8080367	Zm00001d003538	M1		0.625846438	0.625553866	0.968186736	0.791956531	0.752885893	SORBI_3006G095300
LOC8080366	Zm00001d003540	M1		0.893869459	0.893869459	0.925544859	0.927820562	0.910276085	SORBI_3006G095100
LOC8075861	Zm00001d003556	M1		0.922680115	0.932119416	0.896230694	0.913628546	0.916164692	SORBI_3006G093300
LOC8080358	Zm00001d003559	M1		0.901811252	0.900282948	0.966899129	0.968399435	0.934348191	SORBI_3006G093100
LOC8080357	Zm00001d003566	M1		0.805943834	0.794933883	0.949223463	0.936567835	0.871667254	SORBI_3006G092800
LOC8075856	Zm00001d003572	M1		0.79443343	0.812630647	0.952169883	0.949277657	0.877127904	SORBI_3006G092400
LOC8075851	Zm00001d003588	M1		0.624321983	0.618817008	0.714399399	0.637744406	0.648820699	SORBI_3006G091400
LOC8080348	Zm00001d003589	M1		0.850133775	0.839170019	0.946637145	0.946004364	0.895486326	SORBI_3006G091300
LOC110436356	Zm00001d003590	M1		0.943572075	0.941085212	0.899798913	0.912699839	0.92428901	SORBI_3006G091000
LOC8075850	Zm00001d003593	M1		0.603664851	0.632979809	0.584094468	0.624772173	0.611377825	SORBI_3006G090800
LOC8080341	Zm00001d003601	M1		0.906688738	0.904294266	0.862116545	0.858559877	0.882914856	SORBI_3006G089500
LOC8080340	Zm00001d003602	M1		0.978607588	0.969468558	0.837248107	0.840533949	0.90646455	SORBI_3006G089400
LOC8075842	Zm00001d003603	M1		0.777560487	0.67863261	0.754346183	0.519060454	0.682399934	SORBI_3006G089300
LOC8080332	Zm00001d003607	M1		0.455053606	0.525836814	0.537087665	0.472921747	0.497724958	SORBI_3006G088400
LOC8080325	Zm00001d003614	M1		0.969560949	0.951295722	0.94243101	0.962383947	0.956417907	SORBI_3006G087900
LOC8075838	Zm00001d003615	M1		0.93343984	0.937339518	0.968098722	0.964009755	0.950721959	SORBI_3006G087700
LOC8080323	Zm00001d003617	M1		0.691917695	0.689057417	0.605027779	0.550558337	0.634140307	SORBI_3006G086900
LOC8080322	Zm00001d003618	M1		0.955471291	0.965796008	0.974668207	0.972243614	0.96704478	SORBI_3006G086800
LOC8080319	Zm00001d003624	M1		0.6786818	0.675475911	0.560197664	0.492959825	0.6018288	SORBI_3006G086400
LOC110436208	Zm00001d003626	M1		0.717998961	0.704055161	0.618801914	0.563595357	0.651112848	SORBI_3006G086000
LOC8075829	Zm00001d003632	M1		0.86099359	0.849625623	0.772093156	0.79623925	0.819737905	SORBI_3006G085300
LOC8075828	Zm00001d003640	M1		0.759509557	0.761792389	0.748754974	0.755713002	0.75644248	SORBI_3006G085100
LOC8080310	Zm00001d003643	M1		0.837972783	0.785148115	0.553011717	0.548588114	0.681180182	SORBI_3006G084400
LOC8080309	Zm00001d003644	M1		0.910727003	0.885046099	0.920677705	0.924791426	0.910310558	SORBI_3006G084300
LOC8075825	Zm00001d003645	M1		0.673470252	0.692021635	0.67993839	0.703334617	0.687191224	SORBI_3006G084201
LOC8080306	Zm00001d003648	M1		0.762604662	0.790491406	0.768767381	0.782248749	0.776028049	SORBI_3006G083900
LOC8080304	Zm00001d003652	M1		0.992219891	0.994106211	0.92538399	0.93670719	0.962104321	SORBI_3006G083600
LOC8080303	Zm00001d003653	M1		0.999707428	0.999572691	0.995079793	0.995170251	0.997382541	SORBI_3006G083500
LOC8080302	Zm00001d003654	M1		0.876673147	0.88493446	0.940238737	0.940555342	0.910600421	SORBI_3006G083400
LOC8080301	Zm00001d003655	M1		0.942263199	0.948645891	0.980831362	0.979088692	0.962707286	SORBI_3006G083300
LOC8080300	Zm00001d003658	M1		0.893257367	0.896949166	0.935221552	0.939237582	0.916166417	SORBI_3006G083100
LOC110436350	Zm00001d003659	M1		0.877185148	0.849631184	0.789467701	0.739280366	0.8138911	SORBI_3006G083000
LOC8074010	Zm00001d003660	M1		0.759216985	0.755659923	0.857353356	0.867058144	0.809822102	SORBI_3006G082700
LOC8074005	Zm00001d003667	M1		0.826427733	0.865339826	0.546168656	0.522442562	0.690094694	SORBI_3006G082100
LOC8079538	Zm00001d003668	M1		0.753196158	0.752426231	0.807179224	0.732280837	0.761270613	SORBI_3006G082000
LOC8077612	Zm00001d003670	M1		0.763440032	0.800469655	0.939689385	0.938518804	0.860529469	SORBI_3006G081500
LOC8074002	Zm00001d003671	M1		0.701549477	0.714411102	0.327579441	0.302715588	0.511563902	SORBI_3006G081200
LOC8074000	Zm00001d003673	M1		0.984624565	0.96818663	0.970750866	0.979553331	0.975778848	SORBI_3006G081000
LOC8073997	Zm00001d003678	M1		0.937709083	0.934529286	0.969888333	0.931265013	0.943347929	SORBI_3006G080400
LOC8077608	Zm00001d003679	M1		0.965060728	0.969098993	0.961857088	0.96251444	0.964632812	SORBI_3006G080300
LOC8077605	Zm00001d003684	M1		0.853737032	0.848001078	0.873740763	0.914275446	0.87243858	SORBI_3006G080000
LOC8073986	Zm00001d003709	M1		0.849852752	0.863330318	0.872237197	0.871906331	0.864331649	SORBI_3006G079100
LOC8073023	Zm00001d003715	M1		0.99097261	0.986949743	0.98556454	0.985213708	0.98717515	SORBI_3006G077400
LOC8073016	Zm00001d003729	M1		0.848335996	0.851219371	0.699048352	0.744878706	0.785870607	SORBI_3006G076601
LOC8077578	Zm00001d003750	M1		0.797817258	0.809928204	0.786736833	0.820221134	0.803675857	SORBI_3006G075100
LOC8073003	Zm00001d003755	M1		0.179073393	0.171870729	0.828552176	0.840290078	0.504946594	SORBI_3006G074600
LOC8073002	Zm00001d003756	M1		0.986857352	0.987126826	0.976434347	0.973921476	0.981085	SORBI_3006G074500
LOC8072995	Zm00001d003765	M1		0.886863126	0.882994245	0.878021649	0.868129893	0.879002228	SORBI_3006G073600
LOC8075293	Zm00001d003767	M1		0.998979847	0.999145381	0.999281222	0.999443803	0.999212563	SORBI_3006G073500
LOC8075292	Zm00001d003770	M1		0.894104287	0.887837084	0.873995636	0.864697361	0.880158592	SORBI_3006G073300
LOC8075288	Zm00001d003775	M1		0.465058803	0.497903875	0.839404441	0.85087922	0.663311585	SORBI_3006G072400
LOC8155297	Zm00001d003778	M1		0.743687564	0.761861683	0.737260942	0.745347195	0.747039346	SORBI_3006G071362
LOC8072970	Zm00001d003779	M1		0.995442462	0.994579716	0.99623925	0.997025872	0.995821825	SORBI_3006G069500
LOC8075274	Zm00001d003781	M1		0.783766096	0.835104806	0.923257605	0.924764472	0.866723245	SORBI_3006G069300
LOC8072968	Zm00001d003784	M1		0.858772352	0.878097083	0.838882471	0.695212425	0.817741083	SORBI_3006G069200
LOC8075273	Zm00001d003786	M1		0.81690759	0.81690759	0.652012395	0.5978237	0.720912819	SORBI_3006G069100
LOC8072958	Zm00001d003807	M1		0.792770389	0.782934575	0.434263894	0.437047876	0.611754184	SORBI_3006G068000
LOC8075265	Zm00001d003813	M1		0.983989375	0.984274248	0.964714271	0.960296068	0.973318491	SORBI_3006G067600
LOC8075258	Zm00001d003817	M1		0.932165611	0.930221546	0.989204067	0.987538328	0.959782388	SORBI_3006G066800
LOC8072073	Zm00001d003833	M1		0.725605836	0.711173561	0.869413426	0.864352641	0.792636366	SORBI_3006G065900
LOC110436326	Zm00001d003839	M1		0.957523146	0.957754124	0.974888974	0.96266062	0.963206716	SORBI_3006G065600
LOC8075253	Zm00001d003840	M1		0.867218447	0.854652817	0.844892825	0.827814145	0.848644558	SORBI_3006G065400
LOC8072071	Zm00001d003846	M1		0.918768887	0.864415914	0.86243101	0.905300988	0.8877292	SORBI_3006G065200
LOC8072070	Zm00001d003847	M1		0.966796913	0.962354436	0.973122834	0.984645287	0.971729867	SORBI_3006G065100
LOC8072062	Zm00001d003851	M1		0.84252305	0.823948569	0.879459205	0.880913875	0.856711175	SORBI_3006G063600
LOC110436520	Zm00001d003867	M1		0.937920813	0.937920813	0.948751123	0.9488164	0.943352287	SORBI_3006G060200
LOC8072039	Zm00001d003878	M1		0.957842665	0.969930514	0.913486257	0.93424892	0.943877089	SORBI_3006G059000
LOC8072037	Zm00001d003879	M1		0.899355186	0.892764614	0.887774355	0.887774355	0.891917128	SORBI_3006G058800
LOC8070847	Zm00001d003888	M1		0.615575616	0.621165284	0.706526762	0.707912977	0.66279516	SORBI_3006G058500
LOC8072024	Zm00001d003895	M1		0.879237003	0.870228861	0.928347523	0.930486744	0.902075033	SORBI_3006G058000
LOC8072021	Zm00001d003896	M1		0.997447693	0.996373645	0.998083258	0.998665126	0.997642431	SORBI_3006G057200
LOC8072020	Zm00001d003897	M1		0.612819279	0.654441514	0.686704439	0.783123384	0.684272154	SORBI_3006G057000
LOC8072012	Zm00001d003902	M1		0.95401613	0.952872789	0.821238181	0.810400279	0.884631845	SORBI_3006G056700
LOC8072010	Zm00001d003903	M1		0.849309953	0.825878946	0.980083246	0.965791298	0.905265861	SORBI_3006G056400
LOC8070841	Zm00001d003905	M1		0.935445499	0.935499394	0.972198691	0.97069054	0.953458531	SORBI_3006G056100
LOC8070837	Zm00001d003917	M1		0.978626836	0.985294401	0.974913362	0.965453729	0.976072082	SORBI_3006G055300
LOC8070836	Zm00001d003922	M1		0.994980078	0.997763363	0.98999945	0.986522911	0.992316451	SORBI_3006G055200
LOC8072002	Zm00001d003924	M1		0.968725579	0.96881412	0.823944295	0.844707996	0.901547998	SORBI_3006G054800
LOC8071855	Zm00001d003925	M1		0.865112698	0.88745597	0.747597655	0.755743807	0.813977533	SORBI_3006G054700
LOC110436599	Zm00001d003931	M1		0.793975324	0.789436606	0.910053725	0.814623711	0.827022342	SORBI_3006G053700
LOC8070976	Zm00001d003937	M1		0.823086251	0.814605509	0.864615867	0.871683852	0.84349787	SORBI_3006G053500
LOC8070973	Zm00001d003939	M1		0.643092795	0.638015129	0.790951097	0.800455654	0.718128669	SORBI_3006G053200
LOC8070972	Zm00001d003941	M1		0.974834947	0.967832464	0.807733282	0.848510186	0.89972772	SORBI_3006G053100
LOC8070958	Zm00001d003974	M1		0.765884549	0.753635016	0.902348864	0.896235583	0.829526003	SORBI_3006G050500
LOC8070957	Zm00001d003978	M1		0.814285989	0.791157392	0.910788802	0.900149745	0.854095482	SORBI_3006G050300
LOC8070785	Zm00001d003999	M1		0.680880796	0.652447404	0.591100843	0.608863707	0.633323188	SORBI_3006G046900
LOC110436331	Zm00001d004006	M1		0.878302397	0.868388736	0.876857913	0.87115903	0.873677019	SORBI_3006G047000
LOC8070790	Zm00001d004009	M1		0.995442034	0.99832156	0.9978488	0.999306893	0.997729822	SORBI_3006G047400
LOC8070793	Zm00001d004012	M1		0.995195658	0.995715358	0.976056622	0.979928407	0.986724011	SORBI_3006G047900
LOC8070938	Zm00001d004013	M1		0.660242912	0.660242912	0.160355966	0.159237867	0.410019914	SORBI_3006G048000
LOC8070794	Zm00001d004015	M1		0.694262122	0.539041056	0.824273022	0.770189963	0.706941541	SORBI_3006G048400
LOC8070944	Zm00001d004020	M1		0.797813408	0.798694974	0.946142985	0.930481039	0.868283102	SORBI_3006G049100
LOC8070802	Zm00001d004021	M1		0.983077012	0.983077012	0.987941214	0.990105392	0.986050158	SORBI_3006G049200
LOC110436396	Zm00001d004033	M1		0.947664235	0.945858757	0.849050186	0.877165961	0.904934785	SORBI_3006G049900
LOC8086485	Zm00001d004048	M1		0.48986969	0.46635613	0.441838018	0.441838018	0.459975464	SORBI_3006G041700
LOC8069465	Zm00001d004051	M1		0.965091525	0.963821146	0.942671031	0.944281864	0.953966391	SORBI_3006G041800
LOC8069468	Zm00001d004055	M1		0.702099975	0.685084596	0.536760365	0.558223591	0.620542132	SORBI_3006G042200
LOC8069448	Zm00001d004075	M1		0.679702808	0.657659808	0.811249447	0.82236555	0.742744403	SORBI_3006G038800
LOC8069453	Zm00001d004090	M1		0.853563798	0.885935365	0.915569247	0.914063235	0.892282911	SORBI_3006G040000
LOC8086471	Zm00001d004118	M1		0.978249572	0.981425519	0.990743165	0.992434494	0.985713188	SORBI_3006G039800
LOC110436241	Zm00001d004123	M1		0.972255693	0.972659904	0.807324691	0.7776372	0.882469372	SORBI_3006G029800
LOC8085746	Zm00001d004132	M1		0.856177699	0.854826478	0.791528687	0.788448209	0.822745268	SORBI_3006G031300
LOC8069409	Zm00001d004133	M1		0.996454488	0.994894958	0.99331023	0.988790485	0.99336254	SORBI_3006G031400
LOC8069412	Zm00001d004136	M1		0.970246184	0.968721729	0.90105433	0.917682796	0.93942626	SORBI_3006G032100
LOC8069413	Zm00001d004138	M1		0.871229765	0.864539103	0.962706257	0.964103881	0.915644751	SORBI_3006G032200
LOC8085752	Zm00001d004139	M1		0.992042808	0.993016765	0.99802336	0.997986688	0.995267405	SORBI_3006G032300
LOC8085753	Zm00001d004140	M1		0.990214232	0.955987142	0.992311642	0.989851538	0.982091139	SORBI_3006G032400
LOC8069416	Zm00001d004154	M1		0.991727138	0.991858026	0.991811064	0.991999315	0.991848886	SORBI_3006G033101
LOC8085760	Zm00001d004159	M1		0.976563432	0.972082459	0.977406165	0.970944496	0.974249138	SORBI_3006G033200
LOC8069420	Zm00001d004165	M1		0.862514196	0.850511039	0.840764985	0.825459576	0.844812449	SORBI_3006G033500
LOC8069431	Zm00001d004176	M1		0.857194002	0.888310588	0.964112437	0.960065032	0.917420515	SORBI_3006G034800
LOC8069447	Zm00001d004190	M1		0.781048255	0.781048255	0.760318886	0.73268301	0.763774602	SORBI_3006G038100
LOC8086462	Zm00001d004193	M1		0.807010182	0.797357441	0.858580413	0.859903878	0.830712978	SORBI_3006G038200
LOC8086466	Zm00001d004196	M1		0.937231729	0.937231729	0.984720832	0.984720832	0.96097628	SORBI_3006G038500
LOC8085843	Zm00001d004208	M1		0.99717052	0.905014147	0.998197921	0.999130865	0.974878363	SORBI_3006G036400
LOC8067782	Zm00001d004260	M1		0.927519104	0.929116702	0.935036153	0.914138108	0.926452517	SORBI_3006G029100
LOC8067784	Zm00001d004270	M1		0.784016322	0.78309241	0.825901681	0.794631983	0.796910599	SORBI_3006G029400
LOC110436182	Zm00001d004310	M1		0.854530056	0.923338402	0.812995764	0.822019709	0.853220983	SORBI_3006G026600
LOC8083429	Zm00001d004340	M1		0.537824572	0.548907667	0.257058511	0.247434219	0.397806242	SORBI_3006G024600
LOC110436649	Zm00001d004354	M1		0.913822108	0.845217793	0.828883144	0.854297083	0.860555032	SORBI_3006G024500
LOC8066020	Zm00001d004375	M1		0.555571382	0.608203569	0.80775824	0.822658623	0.698547953	SORBI_3006G018900
LOC8067727	Zm00001d004386	M1		0.952114411	0.947629588	0.920977196	0.909703504	0.932606175	SORBI_3006G020900
LOC8067734	Zm00001d004392	M1		0.98446673	0.985856447	0.98494274	0.988043897	0.985827453	SORBI_3006G021600
LOC110436658	Zm00001d004400	M1		0.960256386	0.962019518	0.983801823	0.985682197	0.972939981	SORBI_3006G021800
LOC8066017	Zm00001d004409	M1		0.737516602	0.732850846	0.522952124	0.550314465	0.635908509	SORBI_3006G017600
LOC8083396	Zm00001d004410	M1		0.962851038	0.918876677	0.984512044	0.984859453	0.962774803	SORBI_3006G017100
LOC8066013	Zm00001d004413	M1		0.317279079	0.344561431	0.687642436	0.657029173	0.50162803	SORBI_3006G016900
LOC8066011	Zm00001d004416	M1		0.613304333	0.583400381	0.713233218	0.637556155	0.636873522	SORBI_3006G016700
LOC8066009	Zm00001d004426	M1		0.217388794	0.232606394	0.698536773	0.701031104	0.462390766	SORBI_3006G016500
LOC8066007	Zm00001d004438	M1		0.781756588	0.794487325	0.492641693	0.450679559	0.629891291	SORBI_3006G015800
LOC8080295	Zm00001d004440	M1		0.806913941	0.836656208	0.897417248	0.89572869	0.859179022	SORBI_3006G014900
LOC8080294	Zm00001d004443	M1		0.861663427	0.869615058	0.942549095	0.979437813	0.913316348	SORBI_3006G014700
LOC8080293	Zm00001d004448	M1		0.944091775	0.926880065	0.96514782	0.968722885	0.951210636	SORBI_3006G014400
LOC8080292	Zm00001d004451	M1		0.619394453	0.62477239	0.893184444	0.87993839	0.754322419	SORBI_3006G014000
LOC8065993	Zm00001d004452	M1		0.592254538	0.630881759	0.926139848	0.919180251	0.767114099	SORBI_3006G013800
LOC8065991	Zm00001d004458	M1		0.860269859	0.845263989	0.934011038	0.947490694	0.896758895	SORBI_3006G013500
LOC8065987	Zm00001d004460	M1		0.868542721	0.872696476	0.920876653	0.949730458	0.902961577	SORBI_3006G013100
LOC110436312	Zm00001d004463	M1		0.911439185	0.914368756	0.933461687	0.945640574	0.926227551	SORBI_3006G012900
LOC8065985	Zm00001d004465	M1		0.858460532	0.864423614	0.914285714	0.924939032	0.890527223	SORBI_3006G012700
LOC8080287	Zm00001d004466	M1		0.995776952	0.995946336	0.990899756	0.989632726	0.993063943	SORBI_3006G012500
LOC8080285	Zm00001d004468	M1		0.834689046	0.824845533	0.795257348	0.775886707	0.807669659	SORBI_3006G012300
LOC8080286	Zm00001d004469	M1		0.921910188	0.915550594	0.949428828	0.964754204	0.937910953	SORBI_3006G012400
LOC8065979	Zm00001d004472	M1		0.821149885	0.764683464	0.677242973	0.699591103	0.740666856	SORBI_3006G011300
LOC8065978	Zm00001d004473	M1		0.900494678	0.926283372	0.947246823	0.924564241	0.924647278	SORBI_3006G011200
LOC8065977	Zm00001d004477	M1		0.926029296	0.923353801	0.915957973	0.938698498	0.926009892	SORBI_3006G011000
LOC8080275	Zm00001d004478	M1		0.990629992	0.98907859	0.970026954	0.970026954	0.979940623	SORBI_3006G010900
LOC8080274	Zm00001d004480	M1		0.749931669	0.815344638	0.925696316	0.916596072	0.851892174	SORBI_3006G010800
LOC8080273	Zm00001d004482	M1		0.79622351	0.825172752	0.608372298	0.571113189	0.700220437	SORBI_3006G010700
LOC8080267	Zm00001d004495	M1		0.996423691	0.989825419	0.988992998	0.993402644	0.992161188	SORBI_3006G009900
LOC8065968	Zm00001d004498	M1		0.951748696	0.957769522	0.975484533	0.962880246	0.96197075	SORBI_3006G009400
LOC8080262	Zm00001d004512	M1		0.939880276	0.957007295	0.672519574	0.692183288	0.815397608	SORBI_3006G008800
LOC8080261	Zm00001d004513	M1		0.923738764	0.901322349	0.908689514	0.95359603	0.921836664	SORBI_3006G008700
LOC8065962	Zm00001d004521	M1		0.942979231	0.942313245	0.94424621	0.947206891	0.944186394	SORBI_3006G008300
LOC8080260	Zm00001d004523	M1		0.942332493	0.939310531	0.961098704	0.945381423	0.947030788	SORBI_3006G008100
LOC8083288	Zm00001d014361	M1		0.817862299	0.841980251	0.76040853	0.722183716	0.785608699	SORBI_3010G230300
LOC8083212	Zm00001d014366	M1		0.965299405	0.951794892	0.960150601	0.951020408	0.957066327	SORBI_3010G230000
LOC8061614	Zm00001d014367	M1		0.91149693	0.900537024	0.783165761	0.793439724	0.84715986	SORBI_3010G229400
LOC8061609	Zm00001d014385	M1		0.970415568	0.95128289	0.889301758	0.940948958	0.937987294	SORBI_3010G228400
LOC8083205	Zm00001d014386	M1		0.939387523	0.950769606	0.951889543	0.958402552	0.950112306	SORBI_3010G228100
LOC8083203	Zm00001d014391	M1		0.939556907	0.899797894	0.582165319	0.573915772	0.748858973	SORBI_3010G227800
LOC8083201	Zm00001d014405	M1		0.827290051	0.799551732	0.567167244	0.469111796	0.665780206	SORBI_3010G227300
LOC8061620	Zm00001d014451	M1		0.666078956	0.660650973	0.57234701	0.652635825	0.637928191	SORBI_3010G231100
LOC8061621	Zm00001d014455	M1		0.813485266	0.845175447	0.803247337	0.864811963	0.831680003	SORBI_3010G231200
LOC110430943	Zm00001d014456	M1		0.924023637	0.930837488	0.969105378	0.97049416	0.948615166	SORBI_3010G231300
LOC8083292	Zm00001d014458	M1		0.962554617	0.902977691	0.832401489	0.79253626	0.872617514	SORBI_3010G231500
LOC8061623	Zm00001d014459	M1		0.92776548	0.920012319	0.974888974	0.981160598	0.950956843	SORBI_3010G231600
LOC8061625	Zm00001d014463	M1		0.684391662	0.684391662	0.742466949	0.715817396	0.706766917	SORBI_3010G231900
LOC8083297	Zm00001d014467	M1		0.948002147	0.98425115	0.969210628	0.975450306	0.969228558	SORBI_3010G232500
LOC8061627	Zm00001d014471	M1		0.926649087	0.926649087	0.959568733	0.95746374	0.942582662	SORBI_3010G232700
LOC110431240	Zm00001d014481	M1		0.335025889	0.334155872	0.562095866	0.56978565	0.450265819	SORBI_3010G233400
LOC110430751	Zm00001d014486	M1		0.998346796	0.996423691	0.88202627	0.876556283	0.93833826	SORBI_3010G233200
LOC8083303	Zm00001d014487	M1		0.896057762	0.943868497	0.85724554	0.831178833	0.882087658	SORBI_3010G233700
LOC8083304	Zm00001d014488	M1		0.998775817	0.999141532	0.999466621	0.999532794	0.999229191	SORBI_3010G233800
LOC8083305	Zm00001d014489	M1		0.747356264	0.71957731	0.686997818	0.650414296	0.701086422	SORBI_3010G233900
LOC8061631	Zm00001d014491	M1		0.995195658	0.999856708	0.995654326	0.997869336	0.997144007	SORBI_3010G234000
LOC8083309	Zm00001d014493	M1		0.984181857	0.928313411	0.9305389	0.903690155	0.936681081	SORBI_3010G234600
LOC8061636	Zm00001d014496	M1		0.84000154	0.841964853	0.911764286	0.935523895	0.882313644	SORBI_3010G234900
LOC8084042	Zm00001d014497	M1		0.836613863	0.83947414	0.816641913	0.857409832	0.837534937	SORBI_3010G235200
LOC8077742	Zm00001d014499	M1		0.783812292	0.752099013	0.908064861	0.91061196	0.838647031	SORBI_3010G236100
LOC8061639	Zm00001d014500	M1		0.990164187	0.99831771	0.947099217	0.947472725	0.97076346	SORBI_3010G236200
LOC8064947	Zm00001d014507	M1		0.689392335	0.711935788	0.85024601	0.90565396	0.789307023	SORBI_3010G236300
LOC8065093	Zm00001d014512	M1		0.991426867	0.993139953	0.986904304	0.986054422	0.989381386	SORBI_3010G236400
LOC8061641	Zm00001d014516	M1		0.884776625	0.916312821	0.895255209	0.904011038	0.900088923	SORBI_3010G236600
LOC8065100	Zm00001d014526	M1		0.940488518	0.94445749	0.960426866	0.970305481	0.953919589	SORBI_3010G238700
LOC8063779	Zm00001d014530	M1		0.992924374	0.992597155	0.848785636	0.863072776	0.924344985	SORBI_3010G238600
LOC8063777	Zm00001d014532	M1		0.973275845	0.981760437	0.753675486	0.783673469	0.87309631	SORBI_3010G238100
LOC8063776	Zm00001d014533	M1		0.984397436	0.98015514	0.902592735	0.883190006	0.937583829	SORBI_3010G237900
LOC8065099	Zm00001d014542	M1		0.295459357	0.280773006	0.92305224	0.958471313	0.614438979	SORBI_3010G237800
LOC8065117	Zm00001d014554	M1		0.293203472	0.279089861	0.771948402	0.754351174	0.524648227	SORBI_3010G242100
LOC8065114	Zm00001d014559	M1		0.96283179	0.906681039	0.829213195	0.808182518	0.876727135	SORBI_3010G241300
LOC8063790	Zm00001d014562	M1		0.928454565	0.916289723	0.715363881	0.692799384	0.813226888	SORBI_3010G241200
LOC8063789	Zm00001d014563	M1		0.885107693	0.877008065	0.993762033	0.995030896	0.937727172	SORBI_3010G241100
LOC8063788	Zm00001d014568	M1		0.958073643	0.932923989	0.95081871	0.95282591	0.948660563	SORBI_3010G240800
LOC8065111	Zm00001d014569	M1		0.979192732	0.981140646	0.966647414	0.951448252	0.969607261	SORBI_3010G240500
LOC110430746	Zm00001d014572	M1		0.906484707	0.922753258	0.782730073	0.773058657	0.846256674	SORBI_3010G239900
LOC8065105	Zm00001d014575	M1		0.947248475	0.956757069	0.739879348	0.765241946	0.852281709	SORBI_3010G239600
LOC8065119	Zm00001d014583	M1		0.716921063	0.721355841	0.670612612	0.699300475	0.702047498	SORBI_3010G243000
LOC8065121	Zm00001d014595	M1		0.80240987	0.805069967	0.640374221	0.604220988	0.713018762	SORBI_3010G244000
LOC110431387	Zm00001d014596	M1		0.883956653	0.925170827	0.826832242	0.881317271	0.879319248	SORBI_3010G244100
LOC8063810	Zm00001d014608	M1		0.844378573	0.791091948	0.727762803	0.678291802	0.760381282	SORBI_3010G245800
LOC8063811	Zm00001d014609	M1		0.950370527	0.959293977	0.695755175	0.706982416	0.828100524	SORBI_3010G246000
LOC8063812	Zm00001d014611	M1		0.513860605	0.462433353	0.763744492	0.768921405	0.627239964	SORBI_3010G246200
LOC8065131	Zm00001d014612	M1		0.911893442	0.925032668	0.95339751	0.965661233	0.938996213	SORBI_3010G246300
LOC8065132	Zm00001d014613	M1		0.959852174	0.930945277	0.993026141	0.963367989	0.961797895	SORBI_3010G246400
LOC8065133	Zm00001d014617	M1		0.681381248	0.707805132	0.86328841	0.849013819	0.775372152	SORBI_3010G246700
LOC8065135	Zm00001d014625	M1		0.802144246	0.749142494	0.697349506	0.755320241	0.750989122	SORBI_3010G247200
LOC8065136	Zm00001d014626	M1		0.991800281	0.99233153	0.982692851	0.988137309	0.988740493	SORBI_3010G247400
LOC8065554	Zm00001d014642	M1		0.788709025	0.779697034	0.741038194	0.827560005	0.784251065	SORBI_3010G248100
LOC8063821	Zm00001d014654	M1		0.821303871	0.816022174	0.736336799	0.742898216	0.779140265	SORBI_3010G248900
LOC8063822	Zm00001d014658	M1		0.878282294	0.889861991	0.975108031	0.964112437	0.926841188	SORBI_3010G249500
LOC8063823	Zm00001d014659	M1		0.972571363	0.97732566	0.981061481	0.981959241	0.978229436	SORBI_3010G249600
LOC8065561	Zm00001d014663	M1		0.881804708	0.889176756	0.825063107	0.723238352	0.829820731	SORBI_3010G249900
LOC8063829	Zm00001d014666	M1		0.574677112	0.565884549	0.647048589	0.63268515	0.60507385	SORBI_3010G250500
LOC8063830	Zm00001d014667	M1		0.807129521	0.706854272	0.693449707	0.533267323	0.685175206	SORBI_3010G250600
LOC8065564	Zm00001d014669	M1		0.942921487	0.920050815	0.676340833	0.657870192	0.799295832	SORBI_3010G250900
LOC8063834	Zm00001d014682	M1		0.540750294	0.530766056	0.777281479	0.802303024	0.662775213	SORBI_3010G252500
LOC8065577	Zm00001d014685	M1		0.992085154	0.99191962	0.867787618	0.872511017	0.931075852	SORBI_3010G252700
LOC8063837	Zm00001d014688	M1		0.608165072	0.637610918	0.749873786	0.793821931	0.697367927	SORBI_3010G253100
LOC8063838	Zm00001d014689	M1		0.946270668	0.938509807	0.782486202	0.803676036	0.867735678	SORBI_3010G253200
LOC8063839	Zm00001d014690	M1		0.809177526	0.810932959	0.787055577	0.791415736	0.799645449	SORBI_3010G253300
LOC8063841	Zm00001d014692	M1		0.675225685	0.713206167	0.735027596	0.760415864	0.720968828	SORBI_3010G253400
LOC8065580	Zm00001d014696	M1		0.91685562	0.9244086	0.804415351	0.760147749	0.85145683	SORBI_3010G253800
LOC8065582	Zm00001d014698	M1		0.801485958	0.791065001	0.764557395	0.749608523	0.776679219	SORBI_3010G254200
LOC8064297	Zm00001d014701	M1		0.752214502	0.743495082	0.845668079	0.787582742	0.782240101	SORBI_3010G254300
LOC110431314	Zm00001d014702	M1		0.735607183	0.735607183	0.232909768	0.234225388	0.484587381	SORBI_3010G254500
LOC8064950	Zm00001d014703	M1		0.699366735	0.684083691	0.547390579	0.627660121	0.639625281	SORBI_3010G254700
LOC8065585	Zm00001d014705	M1		0.881458241	0.878062865	0.950308048	0.949525093	0.914838562	SORBI_3010G254900
LOC110431267	Zm00001d014715	M1		0.985144265	0.982226243	0.962546528	0.975550544	0.976366895	SORBI_3010G255100
LOC8064953	Zm00001d014716	M1		0.972363482	0.947810521	0.991374663	0.99214193	0.975922649	SORBI_3010G255300
LOC8065587	Zm00001d014717	M1		0.566250265	0.518152946	0.537674525	0.51028965	0.533091846	SORBI_3010G255500
LOC8064957	Zm00001d014722	M1		0.99821762	0.99852559	0.994473477	0.995001559	0.996554561	SORBI_3010G256600
LOC8064960	Zm00001d014727	M1		0.905676284	0.910245799	0.814589484	0.831703247	0.865553704	SORBI_3010G257300
LOC8065600	Zm00001d014728	M1		0.746590187	0.752895887	0.87267645	0.906244385	0.819601727	SORBI_3010G257500
LOC8065602	Zm00001d014736	M1		0.845864531	0.83369969	0.883925897	0.882613842	0.86152599	SORBI_3010G258600
LOC110431307	Zm00001d014742	M1		0.971520413	0.957596289	0.877844807	0.900012835	0.926743586	SORBI_3010G258800
LOC8064970	Zm00001d014744	M1		0.777294863	0.842372914	0.939475035	0.871076884	0.857554924	SORBI_3010G259100
LOC8065606	Zm00001d014751	M1		0.838280754	0.838280754	0.959881915	0.959881915	0.899081334	SORBI_3010G260000
LOC8065607	Zm00001d014752	M1		0.830473697	0.829720025	0.884700295	0.874166162	0.854765045	SORBI_3010G260200
LOC8065608	Zm00001d014753	M1		0.905479953	0.890166112	0.958562444	0.71442947	0.867159495	SORBI_3010G260300
LOC8064978	Zm00001d014755	M1		0.750166497	0.771728293	0.734003622	0.804004621	0.764975758	SORBI_3010G260700
LOC8064979	Zm00001d014756	M1		0.959648144	0.982730545	0.961314337	0.956372738	0.965016441	SORBI_3010G260800
LOC8065611	Zm00001d014758	M1		0.978542144	0.975177564	0.933008172	0.894610591	0.945334618	SORBI_3010G261200
LOC8064980	Zm00001d014759	M1		0.991091948	0.989494351	0.99047619	0.991297651	0.990590035	SORBI_3010G261300
LOC8064984	Zm00001d014763	M1		0.882466845	0.886978615	0.964195154	0.975983277	0.927405973	SORBI_3010G262000
LOC8065622	Zm00001d014770	M1		0.934617828	0.937924663	0.927715129	0.897715313	0.924493233	SORBI_3010G262900
LOC8069186	Zm00001d014772	M1		0.997809559	0.994949281	0.999592122	0.999849643	0.998050151	SORBI_3010G264300
LOC8069189	Zm00001d014778	M1		0.898111755	0.816641965	0.934491365	0.936385288	0.896407593	SORBI_3010G265500
LOC8064991	Zm00001d014779	M1		0.916274325	0.891567378	0.941489264	0.934340906	0.920917968	SORBI_3010G265700
LOC8069191	Zm00001d014780	M1		0.890100668	0.874953216	0.968823001	0.96636632	0.925060801	SORBI_3010G265800
LOC8069193	Zm00001d014781	M1		0.910276596	0.894316016	0.968239707	0.96335658	0.934047225	SORBI_3010G266000
LOC110431225	Zm00001d014783	M1		0.87737763	0.830204223	0.923116416	0.909985881	0.885171038	SORBI_3010G266200
LOC110431319	Zm00001d014786	M1		0.965799858	0.95705734	0.957968596	0.95705301	0.959469701	SORBI_3010G266500
LOC8064994	Zm00001d014788	M1		0.891825304	0.864908667	0.83495201	0.796264921	0.846987726	SORBI_3010G266800
LOC8064995	Zm00001d014790	M1		0.982375095	0.951518146	0.994104308	0.987635306	0.978908214	SORBI_3010G267000
LOC8069198	Zm00001d014794	M1		0.776621177	0.764456336	0.941624952	0.926684636	0.852346775	SORBI_3010G267600
LOC8069201	Zm00001d014796	M1		0.883760322	0.874652089	0.712071621	0.72670664	0.799297668	SORBI_3010G268200
LOC8069206	Zm00001d014808	M1		0.949173291	0.933505284	0.969503273	0.972206025	0.956096968	SORBI_3010G269100
LOC8069209	Zm00001d014812	M1		0.976702019	0.9868766	0.954977355	0.958475897	0.969257968	SORBI_3010G269600
LOC8065009	Zm00001d014813	M1		0.958092892	0.955675322	0.83808497	0.834050685	0.896475967	SORBI_3010G269800
LOC110430894	Zm00001d014820	M1		0.406421188	0.441214174	0.246078809	0.22696518	0.330169838	SORBI_3010G270900
LOC8069218	Zm00001d014826	M1		0.901356996	0.894635536	0.928563727	0.917643435	0.910549923	SORBI_3010G271000
LOC8069228	Zm00001d014845	M1		0.581375474	0.62215464	0.548060949	0.501582412	0.563293369	SORBI_3010G274100
LOC8069231	Zm00001d014848	M1		0.937520451	0.930094508	0.904756771	0.905976982	0.919587178	SORBI_3010G274500
LOC8066381	Zm00001d014849	M1		0.95233384	0.957011145	0.825182903	0.828468746	0.890749159	SORBI_3010G274800
LOC8069232	Zm00001d014850	M1		0.371959271	0.372082459	0.791855988	0.775093056	0.577747693	SORBI_3010G274900
LOC110431286	Zm00001d014852	M1		0.605331742	0.567894058	0.331635403	0.31819407	0.455763818	SORBI_3010G275100
LOC110431285	Zm00001d014853	M1		0.79359806	0.81385868	0.705959868	0.603452702	0.729217327	SORBI_3010G275150
LOC8066383	Zm00001d014861	M1		0.943368044	0.952591766	0.925683481	0.873818509	0.92386545	SORBI_3010G275400
LOC8066384	Zm00001d014862	M1		0.994702905	0.995091718	0.999272665	0.999332563	0.997099963	SORBI_3010G275500
LOC110431210	Zm00001d014863	M1		0.97175909	0.963085866	0.992033543	0.993820709	0.980174802	SORBI_3010G275700
LOC8069236	Zm00001d014875	M1		0.392508614	0.38771582	0.704216404	0.715609586	0.550012606	SORBI_3010G276600
LOC8066389	Zm00001d014876	M1		0.902916097	0.913236964	0.934206135	0.945999963	0.92408979	SORBI_3010G276800
LOC8069237	Zm00001d014879	M1		0.948799877	0.951082709	0.874181748	0.8550507	0.907278758	SORBI_3010G276900
LOC8069238	Zm00001d014880	M1		0.958177584	0.95601409	0.945244513	0.920260557	0.944924186	SORBI_3010G277000
LOC110431029	Zm00001d014883	M1		0.955205667	0.959197736	0.920934412	0.910246866	0.93639617	SORBI_3010G277100
LOC8069239	Zm00001d014885	M1		0.793024464	0.805343291	0.910618479	0.915528174	0.856128602	SORBI_3010G277200
LOC110431358	Zm00001d014887	M1		0.968375262	0.968706331	0.934629701	0.930605827	0.95057928	SORBI_3010G277300
LOC8069240	Zm00001d014888	M1		0.684984505	0.68724039	0.701655757	0.757309716	0.707797592	SORBI_3010G277400
LOC8066394	Zm00001d014889	M1		0.825369084	0.82929186	0.870784972	0.900789372	0.856558822	SORBI_3010G278100
LOC8069243	Zm00001d014890	M1		0.986793619	0.99318401	0.970701236	0.974098319	0.981194296	SORBI_3010G278200
LOC8069245	Zm00001d014894	M1		0.992092853	0.989559794	0.967794749	0.956205879	0.976413319	SORBI_3010G278400
LOC8066396	Zm00001d014895	M1		0.907943718	0.86236021	0.391117957	0.488993711	0.662603899	SORBI_3010G278500
LOC8069246	Zm00001d014896	M1		0.890320097	0.886224087	0.754420343	0.74533436	0.819074722	SORBI_3010G278700
LOC8069249	Zm00001d014898	M1		0.983535118	0.9826728	0.990517264	0.992251132	0.987244079	SORBI_3010G279000
LOC8066397	Zm00001d014899	M1		0.949273382	0.959421015	0.951119424	0.95804133	0.954463788	SORBI_3010G279100
LOC8066399	Zm00001d014900	M1		0.991138144	0.99065694	0.995661661	0.996249233	0.993426495	SORBI_3010G279450
LOC8066401	Zm00001d014901	M1		0.958162185	0.95170635	0.945388269	0.931197536	0.946613585	SORBI_3010G279700
LOC8066402	Zm00001d014909	M1		0.995418936	0.994891537	0.977794892	0.976555366	0.986165183	SORBI_3010G279900
LOC8069250	Zm00001d014911	M1		0.851427252	0.851223221	0.876815129	0.868663843	0.862032361	SORBI_3010G279800
LOC8066468	Zm00001d014918	M1		0.790310473	0.804800493	0.979478886	0.983622128	0.889552995	SORBI_3004G001200
LOC110434935	Zm00001d014919	M1		0.947271572	0.94404173	0.957594946	0.96232191	0.95280754	SORBI_3004G001300
LOC8066469	Zm00001d014920	M1		0.978572513	0.981168877	0.946674735	0.969477602	0.968973432	SORBI_3004G001500
LOC110434418	Zm00001d014924	M1		0.993089908	0.993336285	0.995122577	0.994467976	0.994004187	SORBI_3004G002500
LOC8066473	Zm00001d014925	M1		0.901711162	0.911716359	0.919810037	0.925837505	0.914768766	SORBI_3004G002400
LOC110434419	Zm00001d014926	M1		0.995137913	0.994525821	0.993646515	0.991999315	0.993827391	SORBI_3004G002350
LOC8085169	Zm00001d014944	M1		0.871676323	0.889519373	0.635913233	0.692594019	0.772425737	SORBI_3004G004400
LOC8085171	Zm00001d014946	M1		0.936892961	0.923946644	0.940890771	0.915403814	0.929283547	SORBI_3004G004600
LOC8085174	Zm00001d014948	M1		0.913502589	0.886843878	0.880092414	0.892902066	0.893335237	SORBI_3004G004900
LOC8085176	Zm00001d014951	M1		0.839177718	0.844440167	0.844940744	0.843475805	0.843008609	SORBI_3004G005200
LOC8085179	Zm00001d014953	M1		0.952522472	0.948961561	0.975610034	0.989808754	0.966725705	SORBI_3004G006200
LOC8066491	Zm00001d014957	M1		0.886270283	0.899971128	0.966248235	0.968656142	0.930286447	SORBI_3004G006300
LOC8066493	Zm00001d014960	M1		0.86793063	0.871086473	0.953837762	0.925180336	0.9045088	SORBI_3004G006500
LOC8085185	Zm00001d014966	M1		0.995357342	0.995938637	0.996842511	0.996500235	0.996159681	SORBI_3004G007700
LOC8066503	Zm00001d014967	M1		0.84650742	0.848270552	0.957592093	0.958079836	0.902612475	SORBI_3004G007900
LOC8085189	Zm00001d014972	M1		0.873412507	0.90067946	0.854478815	0.865184187	0.873438742	SORBI_3004G009100
LOC8066513	Zm00001d014983	M1		0.753815949	0.701460936	0.784021449	0.770983614	0.752570487	SORBI_3004G010000
LOC8066516	Zm00001d014984	M1		0.838973688	0.843970512	0.956327814	0.958621772	0.899473446	SORBI_3004G010300
LOC8068217	Zm00001d014986	M1		0.910422882	0.902384848	0.890250656	0.892517007	0.898893848	SORBI_3004G010900
LOC8068219	Zm00001d014990	M1		0.740450022	0.740450022	0.98715826	0.984710563	0.863192217	SORBI_3004G011201
LOC8068220	Zm00001d014991	M1		0.99926472	0.998899005	0.996909254	0.997458606	0.998132896	SORBI_3004G011300
LOC8085198	Zm00001d014992	M1		0.842996555	0.850310858	0.768887178	0.787087665	0.812320564	SORBI_3004G011433
LOC8085201	Zm00001d014996	M1		0.754620522	0.679344792	0.82373679	0.758339394	0.754010375	SORBI_3004G012200
LOC8085205	Zm00001d015004	M1		0.992304583	0.991904221	0.933384675	0.933396084	0.962747391	SORBI_3004G012900
LOC8085210	Zm00001d015008	M1		0.801393567	0.788782168	0.650750866	0.720597026	0.740380907	SORBI_3004G013500
LOC8068230	Zm00001d015009	M1		0.864623795	0.878051316	0.929303042	0.907906559	0.894971178	SORBI_3004G013600
LOC8085211	Zm00001d015014	M1		0.861540238	0.88000308	0.852425163	0.854359018	0.862081875	SORBI_3004G014100
LOC8085217	Zm00001d015020	M1		0.947098339	0.94337831	0.803637897	0.772185855	0.8665751	SORBI_3004G015300
LOC8068239	Zm00001d015025	M1		0.948703636	0.871044983	0.93240919	0.884464981	0.909155697	SORBI_3004G015400
LOC8085223	Zm00001d015026	M1		0.928142744	0.880018478	0.906139563	0.912078039	0.906594706	SORBI_3004G016000
LOC8068243	Zm00001d015029	M1		0.72787327	0.708702096	0.639387327	0.525896181	0.650464719	SORBI_3004G016400
LOC8085226	Zm00001d015030	M1		0.905880315	0.905880315	0.936516493	0.94527874	0.923388966	SORBI_3004G016500
LOC8068244	Zm00001d015031	M1		0.864977961	0.864977961	0.84665212	0.822715669	0.849830928	SORBI_3004G016700
LOC8085227	Zm00001d015032	M1		0.599414856	0.538736935	0.360681128	0.385162367	0.470998821	SORBI_3004G016800
LOC8054270	Zm00001d015052	M1		0.716693935	0.686940119	0.682502603	0.692784715	0.694730343	SORBI_3004G019500
LOC8068263	Zm00001d015059	M1		0.511685562	0.517633245	0.430658085	0.424027724	0.471001154	SORBI_3004G019700
LOC8055039	Zm00001d015060	M1		0.908093854	0.908093854	0.895263766	0.867023203	0.894618669	SORBI_3004G019800
LOC8055044	Zm00001d015064	M1		0.987380902	0.990787827	0.996380439	0.969926839	0.986119002	SORBI_3004G020600
LOC8055047	Zm00001d015065	M1		0.933593825	0.926333417	0.888210756	0.871687112	0.904956277	SORBI_3004G021200
LOC8055060	Zm00001d015082	M1		0.995492079	0.99548823	0.989273337	0.98737371	0.991906839	SORBI_3004G023100
LOC8068278	Zm00001d015085	M1		0.989779224	0.991118896	0.984335772	0.983687731	0.987230406	SORBI_3004G023400
LOC8055064	Zm00001d015086	M1		0.96976113	0.971578157	0.731628069	0.678834553	0.837950477	SORBI_3004G023700
LOC8055066	Zm00001d015090	M1		0.596288953	0.633884473	0.771124191	0.736331094	0.684407178	SORBI_3004G024100
LOC8055068	Zm00001d015092	M1		0.937331819	0.904910207	0.973910067	0.944434461	0.940146639	SORBI_3004G024300
LOC8055069	Zm00001d015093	M1		0.346574789	0.31842242	0.324704329	0.27195482	0.315414089	SORBI_3004G024400
LOC110434658	Zm00001d015100	M1		0.99874502	0.995869343	0.99537415	0.993791371	0.995944971	SORBI_3004G025000
LOC8055074	Zm00001d015102	M1		0.965603526	0.967070237	0.930066744	0.947135584	0.952469023	SORBI_3004G025300
LOC8068284	Zm00001d015114	M1		0.947644987	0.944649972	0.988314722	0.987042742	0.966913106	SORBI_3004G025700
LOC8055076	Zm00001d015115	M1		0.941189152	0.941959078	0.932383519	0.934206135	0.937434471	SORBI_3004G025800
LOC8055086	Zm00001d015121	M1		0.87191115	0.871930399	0.985593634	0.985265049	0.928675058	SORBI_3004G027100
LOC8055085	Zm00001d015123	M1		0.75915924	0.768868015	0.970511763	0.981709665	0.870062171	SORBI_3004G027000
LOC8069517	Zm00001d015124	M1		0.660173618	0.660173618	0.775396112	0.794037076	0.722445106	SORBI_3004G027700
LOC8069917	Zm00001d015126	M1		0.842846419	0.829877004	0.959502723	0.920669148	0.888223824	SORBI_3004G028200
LOC8069920	Zm00001d015130	M1		0.870767809	0.886027756	0.955754809	0.966661166	0.919802885	SORBI_3004G028800
LOC8069921	Zm00001d015131	M1		0.670540681	0.640544338	0.828631327	0.819772815	0.73987229	SORBI_3004G028900
LOC8069925	Zm00001d015138	M1		0.911254403	0.906904317	0.890765698	0.742840029	0.862941112	SORBI_3004G030200
LOC8069931	Zm00001d015151	M1		0.994625912	0.994625912	0.99006546	0.987561146	0.991719607	SORBI_3004G030800
LOC8057515	Zm00001d015152	M1		0.87076396	0.882297461	0.87960182	0.911673013	0.886084063	SORBI_3004G030900
LOC8069932	Zm00001d015156	M1		0.978149481	0.974838797	0.982056219	0.981994609	0.979259776	SORBI_3004G031300
LOC8069933	Zm00001d015163	M1		0.809812715	0.79968048	0.896022884	0.821007145	0.831630806	SORBI_3004G031400
LOC8057520	Zm00001d015164	M1		0.901276153	0.909545166	0.99699083	0.997979353	0.951447876	SORBI_3004G031600
LOC8069936	Zm00001d015180	M1		0.996269705	0.993898331	0.987251957	0.983816492	0.990309121	SORBI_3004G032000
LOC8057523	Zm00001d015181	M1		0.681438993	0.684168383	0.831018697	0.841272694	0.759474692	SORBI_3004G032100
LOC8057524	Zm00001d015182	M1		0.544334302	0.536785171	0.695360031	0.624887691	0.600341799	SORBI_3004G032200
LOC8069937	Zm00001d015183	M1		0.670298154	0.587103728	0.436670517	0.325940187	0.505003147	SORBI_3004G032400
LOC8057527	Zm00001d015194	M1		0.925240121	0.880857698	0.910794506	0.896360269	0.903313149	SORBI_3004G033100
LOC8057528	Zm00001d015195	M1		0.954204762	0.955478991	0.892228212	0.881522636	0.92085865	SORBI_3004G033200
LOC8057534	Zm00001d015198	M1		0.957453853	0.957276769	0.981264096	0.975856758	0.967962869	SORBI_3004G033900
LOC110434958	Zm00001d015200	M1		0.796785556	0.835551364	0.89012108	0.902015146	0.856118286	SORBI_3004G034000
LOC8057535	Zm00001d015201	M1		0.678717302	0.698211845	0.493665768	0.515891963	0.59662172	SORBI_3004G034100
LOC8057536	Zm00001d015203	M1		0.989656035	0.989536697	0.938553031	0.946328385	0.966018537	SORBI_3004G034300
LOC8057538	Zm00001d015204	M1		0.999237773	0.999437954	0.997104922	0.997173377	0.998238506	SORBI_3004G034500
LOC8069943	Zm00001d015205	M1		0.9480338	0.944792409	0.967538042	0.975450306	0.958953639	SORBI_3004G034600
LOC8057539	Zm00001d015208	M1		0.99622351	0.996797105	0.990812761	0.991497882	0.993832815	SORBI_3004G034700
LOC8057541	Zm00001d015210	M1		0.993694301	0.971920775	0.990388177	0.989937107	0.98648509	SORBI_3004G035000
LOC8069946	Zm00001d015211	M1		0.7753277	0.797567032	0.576930646	0.608964189	0.689697392	SORBI_3004G035200
LOC8057544	Zm00001d015212	M1		0.777856909	0.78361981	0.751497149	0.714144526	0.756779598	SORBI_3004G035300
LOC8062817	Zm00001d015213	M1		0.956364406	0.945466094	0.980390479	0.977662871	0.964970963	SORBI_3004G035800
LOC8069948	Zm00001d015215	M1		0.920674456	0.920674456	0.988843537	0.990419145	0.955152898	SORBI_3004G035900
LOC8062821	Zm00001d015226	M1		0.397536235	0.406860047	0.59283789	0.635429158	0.508165832	SORBI_3004G036500
LOC8069949	Zm00001d015227	M1		0.565907647	0.568852617	0.869034784	0.869105378	0.718225106	SORBI_3004G036600
LOC110434970	Zm00001d015231	M1		0.902296306	0.90477932	0.878817439	0.86800154	0.888473651	SORBI_3004G036800
LOC8062824	Zm00001d015242	M1		0.302969992	0.306261429	0.80650323	0.765781029	0.54537892	SORBI_3004G037700
LOC8062825	Zm00001d015243	M1		0.727599946	0.705010298	0.718355938	0.732640226	0.720901602	SORBI_3004G037800
LOC8069957	Zm00001d015245	M1		0.948511154	0.998760418	0.997240406	0.989392889	0.983476217	SORBI_3004G038100
LOC8073376	Zm00001d015249	M1		0.927107193	0.911008026	0.951816198	0.960441535	0.937593238	SORBI_3004G039300
LOC8073377	Zm00001d015251	M1		0.99495698	0.992003456	0.990432184	0.990510418	0.99197576	SORBI_3004G039400
LOC110435018	Zm00001d015260	M1		0.991215137	0.993367082	0.964217972	0.963670332	0.978117631	SORBI_3004G039900
LOC8069966	Zm00001d015265	M1		0.987488692	0.98656478	0.964403371	0.915543576	0.963500105	SORBI_3004G040000
LOC8074628	Zm00001d015269	M1		0.932997132	0.928993513	0.956649614	0.950121936	0.942190549	SORBI_3004G040200
LOC8074629	Zm00001d015272	M1		0.993702	0.993428676	0.978176284	0.990264408	0.988892842	SORBI_3004G040500
LOC8074630	Zm00001d015274	M1		0.9317537	0.932950936	0.760608394	0.745988962	0.842825498	SORBI_3004G040600
LOC8069969	Zm00001d015275	M1		0.45028391	0.458125614	0.812058786	0.827136725	0.636901259	SORBI_3004G040700
LOC8069970	Zm00001d015277	M1		0.73071045	0.730225396	0.909402587	0.92683866	0.824294273	SORBI_3004G041100
LOC8074636	Zm00001d015279	M1		0.977749119	0.962092661	0.926072208	0.935227257	0.950285311	SORBI_3004G041500
LOC8074641	Zm00001d015289	M1		0.640910053	0.682174273	0.48963456	0.49371986	0.576609687	SORBI_3004G042100
LOC8074643	Zm00001d015290	M1		0.959109195	0.958100591	0.82242881	0.838461962	0.894525139	SORBI_3004G042200
LOC8074645	Zm00001d015291	M1		0.321536774	0.330976075	0.649647029	0.661136476	0.490824088	SORBI_3004G042600
LOC8069975	Zm00001d015292	M1		0.988824514	0.952788097	0.965150265	0.963025713	0.967447147	SORBI_3004G042700
LOC8069986	Zm00001d015297	M1		0.83107424	0.806817701	0.581755505	0.569836991	0.697371109	SORBI_3004G044100
LOC8076086	Zm00001d015307	M1		0.991465363	0.917429215	0.99045052	0.994172763	0.973379465	SORBI_3004G047600
LOC8076087	Zm00001d015308	M1		0.951675553	0.966177122	0.885488954	0.878403856	0.920436371	SORBI_3004G047700
LOC8076088	Zm00001d015309	M1		0.843135141	0.843135141	0.830304197	0.841954392	0.839632218	SORBI_3004G047800
LOC8074665	Zm00001d015313	M1		0.930552615	0.929262988	0.813790271	0.803824926	0.8693577	SORBI_3004G048700
LOC8076091	Zm00001d015314	M1		0.992820434	0.994795296	0.99672956	0.99588414	0.995057357	SORBI_3004G048800
LOC8076093	Zm00001d015325	M1		0.80640194	0.810863665	0.889738872	0.909731008	0.854183872	SORBI_3004G049500
LOC8074674	Zm00001d015329	M1		0.963790349	0.965969241	0.871807213	0.877287896	0.919713675	SORBI_3004G050300
LOC8074691	Zm00001d015344	M1		0.9307066	0.932504379	0.671216789	0.730115946	0.816135928	SORBI_3004G052900
LOC8074693	Zm00001d015346	M1		0.964718111	0.961657652	0.934437171	0.93289408	0.948426753	SORBI_3004G053100
LOC8076107	Zm00001d015348	M1		0.779658538	0.775627971	0.909724896	0.917225003	0.845559102	SORBI_3004G053300
LOC8076108	Zm00001d015355	M1		0.660421706	0.68231286	0.536619176	0.553792838	0.608286645	SORBI_3004G053600
LOC8077168	Zm00001d015356	M1		0.794622062	0.858556772	0.766320113	0.782749326	0.800562068	SORBI_3004G053700
LOC8077169	Zm00001d015361	M1		0.687363579	0.70939118	0.733018868	0.735040431	0.716203515	SORBI_3004G054000
LOC8077170	Zm00001d015362	M1		0.867599561	0.859750159	0.887720263	0.890086852	0.876289209	SORBI_3004G054100
LOC8077171	Zm00001d015363	M1		0.554023829	0.570534907	0.904935895	0.892054935	0.730387391	SORBI_3004G054200
LOC8076110	Zm00001d015364	M1		0.963019995	0.95926318	0.940418432	0.95485817	0.954389944	SORBI_3004G054300
LOC8077173	Zm00001d015367	M1		0.92430466	0.925182376	0.934337341	0.923142087	0.926741616	SORBI_3004G054700
LOC8077174	Zm00001d015374	M1		0.991234385	0.990934114	0.973963548	0.977138864	0.983317728	SORBI_3004G055000
LOC8076116	Zm00001d015375	M1		0.981556407	0.981668046	0.997386728	0.9974201	0.98950782	SORBI_3004G055100
LOC110435132	Zm00001d015376	M1		0.969272227	0.929058957	0.828943653	0.816934069	0.886052227	SORBI_3004G055200
LOC8077177	Zm00001d015379	M1		0.977491194	0.961696148	0.954444872	0.960812333	0.963611137	SORBI_3004G055800
LOC8077179	Zm00001d015385	M1		0.999872962	0.999873818	0.999468251	0.999580713	0.999698936	SORBI_3004G056900
LOC8077181	Zm00001d015389	M1		0.971578157	0.973348989	0.941012524	0.918810166	0.951187459	SORBI_3004G057100
LOC8077185	Zm00001d015394	M1		0.713691221	0.680110869	0.476606911	0.461609549	0.583004638	SORBI_3004G057700
LOC8077186	Zm00001d015395	M1		0.676357477	0.668307894	0.851073176	0.839567022	0.758826392	SORBI_3004G057800
LOC8076124	Zm00001d015399	M1		0.964152215	0.937874617	0.9728319	0.951578745	0.956609369	SORBI_3004G058200
LOC8077190	Zm00001d015400	M1		0.96409062	0.96220815	0.996197077	0.996637145	0.979783248	SORBI_3004G058400
LOC8076125	Zm00001d015407	M1		0.776975343	0.772713799	0.945802849	0.949722614	0.861303651	SORBI_3004G058700
LOC8076127	Zm00001d015412	M1		0.608141974	0.62089581	0.828494417	0.800102683	0.714408721	SORBI_3004G059100
LOC8077195	Zm00001d015415	M1		0.917802629	0.918880527	0.847803876	0.853641381	0.884532103	SORBI_3004G059400
LOC8076128	Zm00001d015420	M1		0.829388101	0.79601563	0.857681941	0.739500706	0.805646594	SORBI_3004G059600
LOC110434932	Zm00001d015421	M1		0.847119512	0.844316979	0.953497625	0.923775296	0.892177353	SORBI_3004G059900
LOC8076130	Zm00001d015431	M1		0.9989529	0.993228495	0.99947803	0.999563599	0.997805756	SORBI_3004G060500
LOC8076135	Zm00001d015446	M1		0.851192424	0.84335457	0.814183032	0.803131819	0.827965461	SORBI_3004G061400
LOC8076138	Zm00001d015449	M1		0.971401074	0.986087425	0.976562701	0.97628888	0.97758502	SORBI_3004G061800
LOC8077203	Zm00001d015450	M1		0.919800589	0.923896599	0.962803235	0.949317589	0.938954503	SORBI_3004G061900
LOC8079391	Zm00001d015459	M1		0.984370489	0.99191577	0.994418061	0.998197921	0.99222556	SORBI_3004G062500
LOC8079392	Zm00001d015463	M1		0.668742902	0.621592593	0.874450577	0.8895713	0.763589343	SORBI_3004G063000
LOC8079394	Zm00001d015468	M1		0.908528863	0.914572787	0.877502531	0.886587088	0.896797817	SORBI_3004G063200
LOC8077207	Zm00001d015469	M1		0.73322811	0.751629357	0.901824449	0.899499422	0.821545335	SORBI_3004G063300
LOC8077615	Zm00001d015477	M1		0.976317056	0.928404519	0.914963419	0.881493298	0.925294573	SORBI_3004G064000
LOC110435096	Zm00001d015484	M1		0.943421939	0.916501453	0.847681391	0.886674368	0.898569788	SORBI_3004G064300
LOC8077620	Zm00001d015485	M1		0.957084288	0.956895656	0.992256022	0.992478501	0.974678617	SORBI_3004G064700
LOC8079403	Zm00001d015499	M1		0.992643351	0.990102593	0.945687332	0.949460916	0.969473548	SORBI_3004G065100
LOC8077623	Zm00001d015504	M1		0.769637942	0.816742055	0.699530798	0.718296753	0.751051887	SORBI_3004G065200
LOC8077626	Zm00001d015509	M1		0.831224376	0.795126364	0.902843024	0.910311898	0.859876416	SORBI_3004G065500
LOC8079406	Zm00001d015513	M1		0.633992262	0.645163898	0.547105635	0.580259274	0.601630267	SORBI_3004G065600
LOC8077632	Zm00001d015519	M1		0.897607453	0.981048255	0.97821204	0.979093826	0.958990393	SORBI_3004G066300
LOC8079407	Zm00001d015520	M1		0.962662406	0.971797586	0.948158131	0.944617008	0.956808783	SORBI_3004G066500
LOC8079408	Zm00001d015521	M1		0.767516794	0.753099917	0.78791426	0.716036452	0.756141856	SORBI_3004G066600
LOC8079409	Zm00001d015526	M1		0.984559121	0.991511559	0.997005091	0.996183631	0.99231485	SORBI_3004G066800
LOC8079410	Zm00001d015527	M1		0.842261275	0.810447905	0.963534848	0.958778077	0.893755526	SORBI_3004G066900
LOC8079415	Zm00001d015559	M1		0.815463977	0.816126114	0.881337441	0.879200359	0.848031973	SORBI_3004G067900
LOC8079413	Zm00001d015566	M1		0.962242796	0.9632591	0.932511873	0.931536388	0.947387539	SORBI_3004G067700
LOC8079417	Zm00001d015570	M1		0.807052528	0.840401902	0.938146579	0.945321525	0.882730634	SORBI_3004G068400
LOC8077638	Zm00001d015571	M1		0.975678017	0.982407176	0.944709097	0.960304625	0.965774728	SORBI_3004G068500
LOC8079422	Zm00001d015585	M1		0.954905395	0.966485092	0.897725296	0.92384803	0.935740953	SORBI_3004G069400
LOC8077654	Zm00001d015614	M1		0.857028468	0.841668431	0.980766982	0.964094101	0.910889496	SORBI_3004G070900
LOC110434683	Zm00001d015618	M1		0.978742325	0.993420977	0.993220097	1.000035939	0.991354834	SORBI_3004G071000
LOC110434361	Zm00001d015638	M1		0.871021885	0.853344369	0.753279425	0.793291405	0.817734271	SORBI_3004G073000
LOC8079445	Zm00001d015649	M1		0.951024965	0.971081554	0.748671544	0.779331463	0.862527382	SORBI_3004G073800
LOC8077659	Zm00001d015651	M1		0.991619348	0.980339923	0.868290335	0.829204638	0.917363561	SORBI_3004G074000
LOC8079447	Zm00001d015657	M1		0.61270764	0.602675495	0.8894622	0.860877936	0.741430818	SORBI_3004G074300
LOC110434582	Zm00001d015658	M1		0.865898023	0.843527804	0.667642151	0.78820006	0.79131701	SORBI_3004G074500
LOC8079451	Zm00001d015670	M1		0.807447757	0.715342714	0.981474351	0.922118928	0.856595938	SORBI_3004G075000
LOC8079456	Zm00001d015702	M1		0.891493807	0.891143063	0.703391092	0.729719477	0.80393686	SORBI_3004G075800
LOC8082933	Zm00001d015724	M1		0.953438685	0.953438685	0.769231898	0.799390322	0.868874897	SORBI_3004G086300
LOC8082932	Zm00001d015741	M1		0.885469559	0.894727927	0.816106497	0.702674026	0.824744502	SORBI_3004G086100
LOC8082929	Zm00001d015743	M1		0.776240063	0.845017612	0.973761748	0.975612887	0.892658077	SORBI_3004G085600
LOC8071657	Zm00001d015754	M1		0.998825862	0.99915693	0.994731813	0.995209858	0.996981116	SORBI_3004G085000
LOC8071654	Zm00001d015758	M1		0.926710681	0.920474275	0.922683683	0.925706299	0.923893734	SORBI_3004G084700
LOC8082922	Zm00001d015765	M1		0.989521298	0.992185244	0.976269322	0.977409832	0.983846424	SORBI_3004G084300
LOC8082919	Zm00001d015772	M1		0.420583989	0.436163455	0.793062508	0.772994481	0.605701108	SORBI_3004G083900
LOC8071647	Zm00001d015783	M1		0.717040402	0.642646238	0.798825568	0.770273392	0.7321964	SORBI_3004G083100
LOC8071646	Zm00001d015789	M1		0.156206571	0.183284892	0.419127483	0.472970644	0.307897398	SORBI_3004G082800
LOC8071645	Zm00001d015791	M1		0.673323966	0.734344504	0.633990787	0.709119497	0.687694688	SORBI_3004G082600
LOC8082903	Zm00001d015799	M1		0.798144477	0.806971686	0.628192787	0.686273335	0.729895571	SORBI_3004G081501
LOC8082902	Zm00001d015802	M1		0.987319308	0.986645622	0.944769606	0.953839045	0.968143395	SORBI_3004G081400
LOC8071636	Zm00001d015816	M1		0.891140069	0.909048563	0.890829162	0.860086425	0.887776055	SORBI_3004G080200
LOC8082897	Zm00001d015829	M1		0.860770312	0.850626528	0.811243743	0.777474008	0.825028648	SORBI_3004G079900
LOC8071629	Zm00001d015844	M1		0.802898774	0.808596231	0.589808754	0.573276858	0.693645154	SORBI_3004G078900
LOC8082893	Zm00001d015845	M1		0.434812234	0.453452159	0.704575793	0.666980419	0.564955151	SORBI_3004G078800
LOC8071627	Zm00001d015853	M1		0.847966431	0.854156642	0.841652456	0.844294699	0.847017557	SORBI_3004G078400
LOC8082887	Zm00001d015861	M1		0.849021231	0.874794526	0.816531896	0.810715661	0.837765828	SORBI_3004G077400
LOC8071619	Zm00001d015865	M1		0.930983774	0.922352896	0.916422796	0.919156719	0.922229046	SORBI_3004G077000
LOC8081667	Zm00001d015890	M1		0.980755683	0.976028333	0.991400334	0.989954221	0.984534643	SORBI_3004G136300
LOC8081685	Zm00001d015895	M1		0.912066676	0.909514369	0.958402552	0.962333828	0.935579356	SORBI_3004G137900
LOC8081671	Zm00001d015905	M1		0.805608916	0.767745206	0.665736106	0.532469088	0.692889829	SORBI_3004G136600
LOC8081653	Zm00001d015914	M1		0.545481493	0.52923604	0.497394429	0.466618178	0.509682535	SORBI_3004G133500
LOC8077775	Zm00001d015917	M1		0.712255308	0.758789675	0.935964575	0.963681741	0.842672825	SORBI_3004G133400
LOC8057430	Zm00001d015921	M1		0.945712471	0.947040594	0.971900911	0.983502332	0.962039077	SORBI_3004G128600
LOC8081626	Zm00001d015927	M1		0.837618617	0.819321737	0.900534805	0.892944851	0.862605003	SORBI_3004G128800
LOC8081627	Zm00001d015929	M1		0.971855331	0.918657248	0.875711291	0.86413169	0.90758889	SORBI_3004G128900
LOC110434696	Zm00001d015932	M1		0.984482128	0.982772891	0.962781231	0.978331123	0.977091843	SORBI_3004G129300
LOC110435086	Zm00001d015945	M1		0.837075819	0.829688372	0.873398793	0.879181106	0.854836023	SORBI_3004G131100
LOC8077761	Zm00001d015948	M1		0.953738956	0.968375262	0.919482594	0.950327301	0.947981028	SORBI_3004G131040
LOC8077763	Zm00001d015955	M1		0.976882952	0.982726695	0.974914075	0.97470928	0.97730825	SORBI_3004G131300
LOC8081642	Zm00001d015956	M1		0.758512502	0.766916251	0.384129123	0.404518034	0.578518977	SORBI_3004G130800
LOC8077755	Zm00001d015962	M1		0.981444767	0.968136585	0.942684783	0.952777014	0.961260787	SORBI_3004G130400
LOC8077751	Zm00001d015963	M1		0.724050584	0.645325583	0.729860462	0.698337826	0.699393614	SORBI_3004G129900
LOC110434969	Zm00001d015968	M1		0.966111678	0.970808231	0.988451062	0.993068926	0.979609974	SORBI_3004G132300
LOC8081651	Zm00001d015970	M1		0.96493369	0.956391354	0.989757412	0.984640397	0.973930713	SORBI_3004G133301
LOC8060396	Zm00001d015971	M1		0.822297076	0.821142186	0.884233945	0.879014247	0.851671864	SORBI_3004G128200
LOC8080409	Zm00001d015973	M1		0.990645391	0.99117664	0.982489767	0.980361956	0.986168439	SORBI_3004G128000
LOC8080408	Zm00001d015974	M1		0.887486767	0.918938271	0.821181135	0.82399692	0.862900773	SORBI_3004G127900
LOC8060380	Zm00001d015984	M1		0.729482417	0.713344754	0.862240314	0.862858854	0.791981585	SORBI_3004G125900
LOC8060379	Zm00001d015985	M1		0.953935288	0.953238504	0.883321211	0.868426532	0.914730384	SORBI_3004G125800
LOC8080397	Zm00001d015988	M1		0.90215387	0.910018671	0.686675101	0.661652334	0.790124994	SORBI_3004G124700
LOC8080395	Zm00001d015990	M1		0.807025581	0.806478933	0.890991437	0.90126703	0.851440745	SORBI_3004G124300
LOC110435142	Zm00001d015997	M1		0.680780706	0.67181491	0.89116013	0.877461173	0.78030423	SORBI_3004G124100
LOC8059101	Zm00001d015999	M1		0.968563894	0.968236675	0.965678347	0.965313253	0.966948042	SORBI_3004G123600
LOC8080392	Zm00001d016000	M1		0.884468654	0.902508036	0.934591195	0.94591195	0.916869959	SORBI_3004G123400
LOC8059094	Zm00001d016002	M1		0.974372991	0.973864839	0.952291105	0.973262189	0.968447781	SORBI_3004G122900
LOC8059092	Zm00001d016006	M1		0.641706927	0.645063808	0.681838018	0.678343958	0.661738178	SORBI_3004G122800
LOC8059090	Zm00001d016008	M1		0.851173176	0.877631706	0.682721822	0.682826338	0.77358826	SORBI_3004G122600
LOC8080390	Zm00001d016016	M1		0.661863607	0.614774893	0.631006473	0.625824669	0.633367411	SORBI_3004G122500
LOC8080379	Zm00001d016029	M1		0.979335168	0.955598329	0.870317032	0.838711334	0.910990466	SORBI_3004G121300
LOC8059085	Zm00001d016031	M1		0.8734895	0.877292938	0.840280095	0.824175331	0.853809466	SORBI_3004G121200
LOC8080373	Zm00001d016034	M1		0.811244779	0.813300483	0.410439396	0.367581642	0.600641575	SORBI_3004G119700
LOC8080371	Zm00001d016036	M1		0.993124555	0.966885454	0.936875882	0.953471955	0.962589462	SORBI_3004G119500
LOC8059075	Zm00001d016037	M1		0.90855581	0.907962967	0.926535746	0.930053195	0.91827693	SORBI_3004G119400
LOC110434999	Zm00001d016041	M1		0.889523223	0.883552442	0.93877551	0.954408933	0.916565027	SORBI_3004G118200
LOC8078364	Zm00001d016060	M1		0.907427867	0.909552865	0.822584464	0.861536205	0.87527535	SORBI_3004G117300
LOC8059053	Zm00001d016077	M1		0.943776105	0.950847882	0.93843894	0.926827658	0.939972646	SORBI_3004G115800
LOC8078357	Zm00001d016082	M1		0.99128443	0.997563182	0.997187231	0.997015787	0.995762658	SORBI_3004G115600
LOC8059050	Zm00001d016100	M1		0.994933883	0.995284199	0.879181106	0.884141959	0.938385287	SORBI_3004G114800
LOC8078326	Zm00001d016144	M1		0.886843878	0.970719689	0.826379155	0.85474693	0.884672413	SORBI_3004G109000
LOC8085589	Zm00001d016152	M1		0.175308452	0.171805286	0.676842511	0.676842511	0.42519969	SORBI_3004G108100
LOC8078316	Zm00001d016155	M1		0.837699459	0.80083537	0.718206905	0.712161468	0.767225801	SORBI_3004G107800
LOC8085587	Zm00001d016158	M1		0.462006044	0.441660732	0.931209087	0.928070851	0.690736679	SORBI_3004G107600
LOC8085582	Zm00001d016170	M1		0.973537621	0.966835409	0.932563214	0.93642848	0.952341181	SORBI_3004G106700
LOC8085581	Zm00001d016175	M1		0.724539488	0.710007122	0.635669362	0.653874128	0.681022525	SORBI_3004G106300
LOC8085575	Zm00001d016197	M1		0.910730853	0.918514811	0.787758769	0.80311715	0.855030396	SORBI_3004G104800
LOC110435098	Zm00001d016198	M1		0.791226686	0.810112987	0.903613143	0.889426261	0.848594769	SORBI_3004G104700
LOC8085569	Zm00001d016216	M1		0.495786576	0.486362674	0.532580328	0.668833269	0.545890712	SORBI_3004G103500
LOC8073818	Zm00001d016228	M1		0.876900275	0.895551749	0.890908313	0.901002989	0.891090831	SORBI_3004G102900
LOC8085566	Zm00001d016230	M1		0.653074895	0.691313302	0.689744577	0.745338639	0.694867853	SORBI_3004G102800
LOC8073813	Zm00001d016237	M1		0.723342252	0.662325563	0.854621429	0.883121551	0.780852699	SORBI_3004G102200
LOC8085559	Zm00001d016242	M1		0.500725656	0.466126435	0.425598768	0.453696573	0.461536858	SORBI_3004G102100
LOC8073811	Zm00001d016248	M1		0.991265182	0.994506573	0.953219527	0.942549095	0.970385094	SORBI_3004G101900
LOC8073809	Zm00001d016254	M1		0.52860855	0.531988528	0.567947632	0.57899856	0.551885817	SORBI_3004G101500
LOC8073808	Zm00001d016255	M1		0.922479934	0.94152022	0.906424079	0.927191631	0.924403966	SORBI_3004G101400
LOC8085552	Zm00001d016271	M1		0.447600716	0.429064732	0.679262397	0.783306746	0.584808648	SORBI_3004G099100
LOC110434532	Zm00001d016274	M1		0.778923258	0.778923258	0.801026826	0.819419843	0.794573296	SORBI_3004G099300
LOC8085549	Zm00001d016276	M1		0.992997517	0.971139299	0.990969067	0.992661863	0.986941936	SORBI_3004G099500
LOC8085548	Zm00001d016277	M1		0.715053991	0.717560102	0.695821186	0.748119625	0.719138726	SORBI_3004G099600
LOC8073798	Zm00001d016285	M1		0.823763786	0.94750255	0.918752407	0.916172507	0.901547813	SORBI_3004G099700
LOC8085544	Zm00001d016286	M1		0.925532693	0.925763671	0.970401746	0.972107417	0.948451382	SORBI_3004G098000
LOC8073793	Zm00001d016294	M1		0.674775278	0.640728158	0.289726241	0.316199604	0.48035732	SORBI_3004G097800
LOC8073792	Zm00001d016298	M1		0.48556195	0.48903047	0.455147881	0.511590296	0.485332649	SORBI_3004G097700
LOC8073790	Zm00001d016299	M1		0.91212442	0.911015726	0.966425648	0.952084314	0.935412527	SORBI_3004G097400
LOC8073789	Zm00001d016305	M1		0.710349739	0.732023175	0.830554486	0.758662926	0.757897582	SORBI_3004G097200
LOC8073785	Zm00001d016311	M1		0.891290205	0.905753277	0.89791426	0.905654673	0.900153104	SORBI_3004G096700
LOC8085537	Zm00001d016347	M1		0.917575501	0.908859931	0.917965173	0.925298421	0.917424757	SORBI_3004G095400
LOC8073765	Zm00001d016361	M1		0.86330722	0.870944892	0.916262354	0.951071749	0.900396554	SORBI_3004G094100
LOC8073763	Zm00001d016363	M1		0.694138933	0.736846765	0.679626675	0.647611713	0.689556022	SORBI_3004G093800
LOC8073762	Zm00001d016364	M1		0.538956364	0.549361923	0.861871961	0.856877594	0.701766961	SORBI_3004G093700
LOC8073761	Zm00001d016371	M1		0.783088561	0.819606183	0.945674496	0.925800832	0.868542518	SORBI_3004G093500
LOC8082957	Zm00001d016373	M1		0.90151868	0.894158181	0.795812018	0.803970393	0.848864818	SORBI_3004G092900
LOC8082955	Zm00001d016374	M1		0.953130714	0.953130714	0.894390964	0.903623839	0.926069058	SORBI_3004G092600
LOC8082951	Zm00001d016382	M1		0.970762035	0.981902874	0.910114234	0.943434732	0.951553469	SORBI_3004G091100
LOC8071674	Zm00001d016396	M1		0.504405905	0.513960695	0.61630086	0.580681413	0.553837218	SORBI_3004G089200
LOC8082947	Zm00001d016397	M1		0.843077397	0.843077397	0.766756514	0.690044068	0.785738844	SORBI_3004G089000
LOC110435002	Zm00001d016401	M1		0.995122515	0.92509576	0.958427816	0.949271137	0.956979307	SORBI_3004G088551
LOC8082940	Zm00001d016411	M1		0.950774739	0.966897003	0.992074188	0.993415479	0.975790352	SORBI_3004G087500
LOC8071662	Zm00001d016438	M1		0.997844205	0.996571688	0.989354017	0.98092671	0.991174155	SORBI_3004G086800
LOC8084497	Zm00001d016446	M1		0.966061633	0.927700037	0.967436786	0.969828435	0.957756722	SORBI_3004G142800
LOC110435153	Zm00001d016452	M1		0.996623872	0.995607568	0.995492968	0.994095752	0.99545504	SORBI_3004G141800
LOC8084499	Zm00001d016453	M1		0.884022097	0.882316709	0.687198049	0.675886096	0.782355738	SORBI_3004G143100
LOC8084502	Zm00001d016456	M1		0.877458472	0.877458472	0.984069938	0.987053438	0.93151008	SORBI_3004G143300
LOC8081689	Zm00001d016458	M1		0.947737378	0.955971744	0.988412271	0.991006717	0.970782027	SORBI_3004G138800
LOC8084478	Zm00001d016463	M1		0.926048544	0.924785864	0.91150595	0.892553679	0.913723509	SORBI_3004G140300
LOC8077814	Zm00001d016465	M1		0.947113737	0.94267511	0.920329318	0.912379669	0.930624459	SORBI_3004G140600
LOC110434709	Zm00001d016469	M1		0.752160607	0.809874309	0.656456167	0.645263053	0.715938534	SORBI_3004G141000
LOC8084483	Zm00001d016471	M1		0.797724867	0.797724867	0.752329611	0.801277115	0.787264115	SORBI_3004G141200
LOC8084485	Zm00001d016472	M1		0.912143668	0.914234019	0.941676293	0.943486074	0.927885014	SORBI_3004G141400
LOC8084486	Zm00001d016473	M1		0.687051758	0.679032972	0.79660577	0.795931203	0.739655426	SORBI_3004G141600
LOC8084505	Zm00001d016474	M1		0.911720209	0.891047678	0.931595064	0.968582797	0.925736437	SORBI_3004G143700
LOC8056667	Zm00001d016475	M1		0.978434354	0.978607588	0.924958998	0.917045309	0.949761562	SORBI_3004G144400
LOC8056669	Zm00001d016477	M1		0.90256963	0.912794256	0.95606469	0.923276145	0.92367618	SORBI_3004G144500
LOC8056672	Zm00001d016479	M1		0.979262025	0.979866418	0.984278563	0.979617507	0.980756128	SORBI_3004G145000
LOC8084517	Zm00001d016483	M1		0.857120859	0.820145131	0.985322808	0.990854832	0.913360908	SORBI_3004G145200
LOC8056673	Zm00001d016486	M1		0.965615075	0.962851038	0.969715056	0.975570102	0.968437818	SORBI_3004G145500
LOC8084519	Zm00001d016490	M1		0.884437857	0.880476585	0.87718063	0.89288373	0.8837447	SORBI_3004G145600
LOC8084526	Zm00001d016493	M1		0.691059227	0.666494716	0.785922218	0.779326573	0.730700684	SORBI_3004G146200
LOC8056679	Zm00001d016501	M1		0.914364907	0.90992243	0.930281379	0.918297669	0.918216596	SORBI_3004G146800
LOC8056694	Zm00001d016506	M1		0.962115758	0.956360557	0.913962998	0.915197022	0.936909084	SORBI_3004G147500
LOC8056696	Zm00001d016512	M1		0.982603507	0.972001617	0.89881915	0.829193942	0.920654554	SORBI_3004G147800
LOC8056054	Zm00001d016520	M1		0.975296903	0.970061402	0.960016136	0.971832884	0.969301831	SORBI_3004G150400
LOC8056061	Zm00001d016528	M1		0.946082036	0.946232171	0.985085355	0.982738324	0.965034472	SORBI_3004G151200
LOC8059564	Zm00001d016530	M1		0.901568726	0.901568726	0.809121636	0.777997404	0.847564123	SORBI_3004G151300
LOC8056062	Zm00001d016531	M1		0.956360557	0.957707928	0.732338596	0.772772002	0.854794771	SORBI_3004G151400
LOC110434874	Zm00001d016535	M1		0.852720728	0.84461725	0.8765572	0.844230522	0.854531425	SORBI_3004G151500
LOC8059565	Zm00001d016542	M1		0.849067426	0.925659731	0.853086895	0.842510589	0.86758116	SORBI_3004G151600
LOC8059569	Zm00001d016543	M1		0.928385271	0.907123746	0.738814016	0.780798357	0.838780348	SORBI_3004G152100
LOC8056066	Zm00001d016544	M1		0.757942756	0.760237137	0.869249134	0.872504171	0.8149833	SORBI_3004G152200
LOC8056073	Zm00001d016550	M1		0.745023387	0.746236021	0.795963291	0.760946391	0.762042272	SORBI_3004G152800
LOC8059573	Zm00001d016553	M1		0.85840407	0.861982946	0.542934155	0.607258375	0.717644887	SORBI_3004G153400
LOC8059576	Zm00001d016557	M1		0.871803361	0.84588378	0.950544075	0.945687332	0.903479637	SORBI_3004G154200
LOC8059578	Zm00001d016559	M1		0.939722441	0.94351433	0.932223078	0.951653617	0.941778367	SORBI_3004G154300
LOC8059581	Zm00001d016564	M1		0.728100398	0.719292437	0.902646644	0.928034912	0.819518598	SORBI_3004G154600
LOC8059582	Zm00001d016566	M1		0.993605759	0.993463323	0.991650623	0.989346682	0.992016597	SORBI_3004G155100
LOC8059583	Zm00001d016567	M1		0.672099782	0.646996324	0.463075629	0.457333553	0.559876322	SORBI_3004G155200
LOC8059584	Zm00001d016568	M1		0.683379208	0.680807653	0.876723142	0.832712959	0.768405741	SORBI_3004G155300
LOC8056086	Zm00001d016577	M1		0.834939272	0.816599619	0.74950584	0.714420485	0.778866304	SORBI_3004G155900
LOC8056089	Zm00001d016581	M1		0.994321791	0.994321791	0.897936365	0.896023617	0.945650891	SORBI_3004G156200
LOC8059592	Zm00001d016584	M1		0.592982118	0.540168999	0.909532978	0.901318371	0.736000616	SORBI_3004G157800
LOC8059591	Zm00001d016587	M1		0.994583566	0.981887475	0.992144782	0.990305053	0.989730219	SORBI_3004G157600
LOC8059588	Zm00001d016588	M1		0.958601043	0.985017227	0.914086767	0.927567706	0.946318186	SORBI_3004G157300
LOC8056789	Zm00001d016593	M1		0.925190076	0.937612842	0.976402972	0.978573568	0.954444864	SORBI_3004G156900
LOC110435137	Zm00001d016595	M1		0.972717649	0.970103748	0.979687185	0.948998132	0.967876678	SORBI_3004G156800
LOC8056796	Zm00001d016599	M1		0.745362154	0.756610783	0.753719493	0.717146565	0.743209749	SORBI_3004G158000
LOC8059596	Zm00001d016602	M1		0.954385695	0.951533116	0.962346867	0.954781158	0.955761709	SORBI_3004G158200
LOC110434359	Zm00001d016607	M1		0.637634015	0.637634015	0.585034014	0.569688102	0.607497536	SORBI_3004G158500
LOC8059601	Zm00001d016615	M1		0.946239871	0.947257885	0.953548967	0.965900826	0.953236887	SORBI_3004G158700
LOC8056800	Zm00001d016616	M1		0.866537062	0.869131715	0.970030947	0.972853292	0.919638254	SORBI_3004G158901
LOC110434950	Zm00001d016619	M1		0.968702481	0.968482197	0.946315346	0.954768322	0.959567086	SORBI_3004G159000
LOC8056809	Zm00001d016635	M1		0.990091044	0.983778073	0.976636045	0.930223518	0.97018217	SORBI_3004G160300
LOC8059604	Zm00001d016647	M1		0.77421259	0.804138356	0.737854219	0.792482168	0.777171833	SORBI_3004G160800
LOC8059610	Zm00001d016655	M1		0.792289184	0.78613747	0.840985019	0.840302914	0.814928647	SORBI_3004G161800
LOC8059611	Zm00001d016659	M1		0.937308721	0.949750736	0.96812806	0.961688395	0.954218978	SORBI_3004G161900
LOC8059612	Zm00001d016662	M1		0.602698593	0.554578176	0.684419344	0.673392376	0.628772122	SORBI_3004G162200
LOC8059613	Zm00001d016664	M1		0.936504148	0.936623487	0.861603845	0.853529714	0.897065298	SORBI_3004G162400
LOC8059614	Zm00001d016666	M1		0.56303967	0.56303967	0.699858811	0.699858811	0.631449241	SORBI_3004G162600
LOC8059615	Zm00001d016669	M1		0.719400227	0.687937174	0.802303024	0.768784495	0.74460623	SORBI_3004G162900
LOC8059617	Zm00001d016674	M1		0.877462322	0.821900564	0.868819334	0.845363698	0.853386479	SORBI_3004G163200
LOC8059618	Zm00001d016675	M1		0.762647008	0.763143611	0.72608321	0.742286684	0.748540128	SORBI_3004G163300
LOC8059619	Zm00001d016681	M1		0.61816257	0.606244105	0.648366349	0.712389754	0.646290694	SORBI_3004G163400
LOC8058634	Zm00001d016682	M1		0.864827825	0.811930014	0.801174432	0.805910666	0.820960734	SORBI_3004G163500
LOC8059620	Zm00001d016683	M1		0.790460609	0.833141493	0.948979592	0.925593634	0.874543832	SORBI_3004G163600
LOC8059621	Zm00001d016684	M1		0.67033665	0.636509922	0.458079836	0.475297138	0.560055887	SORBI_3004G163700
LOC8058637	Zm00001d016687	M1		0.939399072	0.933208862	0.974876995	0.986822402	0.958576833	SORBI_3004G164000
LOC8059623	Zm00001d016690	M1		0.981163744	0.980105095	0.971639641	0.97303482	0.976485825	SORBI_3004G164100
LOC8059624	Zm00001d016691	M1		0.818647624	0.877231344	0.629250275	0.564856886	0.722496532	SORBI_3004G164200
LOC110434453	Zm00001d016694	M1		0.62655862	0.63097415	0.533509361	0.53303042	0.581018138	SORBI_3004G164800
LOC110434939	Zm00001d016695	M1		0.975458588	0.975312302	0.727831258	0.712833897	0.847859011	SORBI_3004G165000
LOC8059627	Zm00001d016696	M1		0.80692549	0.775778107	0.689718906	0.700166859	0.743147341	SORBI_3004G165200
LOC8058641	Zm00001d016697	M1		0.92104787	0.913852906	0.815769111	0.832745476	0.870853841	SORBI_3004G165300
LOC8059628	Zm00001d016698	M1		0.94666718	0.94666718	0.925375433	0.832350718	0.912765128	SORBI_3004G165500
LOC8058644	Zm00001d016702	M1		0.996774007	0.92483206	0.987733099	0.990568605	0.974976943	SORBI_3004G165700
LOC8058652	Zm00001d016703	M1		0.343167863	0.336350163	0.430743165	0.489949942	0.400052783	SORBI_3004G166600
LOC8059630	Zm00001d016704	M1		0.882725198	0.887858043	0.865460146	0.881495743	0.879384783	SORBI_3004G166500
LOC8058651	Zm00001d016705	M1		0.972929378	0.972675303	0.932800667	0.979995233	0.964600145	SORBI_3004G166400
LOC8058645	Zm00001d016707	M1		0.949265682	0.939884126	0.928975028	0.917280623	0.933851365	SORBI_3004G165900
LOC110434887	Zm00001d016708	M1		0.889230651	0.886116297	0.905386557	0.912873829	0.898401834	SORBI_3004G166700
LOC8064223	Zm00001d016714	M1		0.968132735	0.963170558	0.77434219	0.806446184	0.878022917	SORBI_3004G166900
LOC8061031	Zm00001d016721	M1		0.459226609	0.459226609	0.521912748	0.510967783	0.487833437	SORBI_3004G170300
LOC8064233	Zm00001d016731	M1		0.99086482	0.990175736	0.921383648	0.95535233	0.964444133	SORBI_3004G169000
LOC8061025	Zm00001d016733	M1		0.996054126	0.997209016	0.994309674	0.993468654	0.995260367	SORBI_3004G168700
LOC8061017	Zm00001d016740	M1		0.571893827	0.551733297	0.772063003	0.74481838	0.660127127	SORBI_3004G167800
LOC8059217	Zm00001d016743	M1		0.312432391	0.381082902	0.370029521	0.346784752	0.352582391	SORBI_3004G167500
LOC8064226	Zm00001d016744	M1		0.850364753	0.802024907	0.932347581	0.950224618	0.883740465	SORBI_3004G167400
LOC8058655	Zm00001d016745	M1		0.603599407	0.584012473	0.360094981	0.384828648	0.483133877	SORBI_3004G167300
LOC8061027	Zm00001d016746	M1		0.294481551	0.292013936	0.273927792	0.272182188	0.283151367	SORBI_3004G169600
LOC8061044	Zm00001d016765	M1		0.911142764	0.907196889	0.794309674	0.798113208	0.852690634	SORBI_3004G172100
LOC110434430	Zm00001d016767	M1		0.917868073	0.910145709	0.982395071	0.965164934	0.943893447	SORBI_3004G172600
LOC110435026	Zm00001d016770	M1		0.975354647	0.971327931	0.893980234	0.851209271	0.922968021	SORBI_3004G173100
LOC8061048	Zm00001d016771	M1		0.953712009	0.937086298	0.403285843	0.352343873	0.661607006	SORBI_3004G173200
LOC110434681	Zm00001d016772	M1		0.952703405	0.960402672	0.946806755	0.951001155	0.952728497	SORBI_3004G173300
LOC8064253	Zm00001d016786	M1		0.968440706	0.962242796	0.953125401	0.944459725	0.957067157	SORBI_3004G173600
LOC8064254	Zm00001d016787	M1		0.945777915	0.963505476	0.984559107	0.99041018	0.971063169	SORBI_3004G173700
LOC8064255	Zm00001d016788	M1		0.519742844	0.540561662	0.676877166	0.715569247	0.61318773	SORBI_3004G174000
LOC8063061	Zm00001d016792	M1		0.958812773	0.976201567	0.886213437	0.886213437	0.926860304	SORBI_3004G174100
LOC8063064	Zm00001d016797	M1		0.975678017	0.976836756	0.993901388	0.993205836	0.984905499	SORBI_3004G174700
LOC8066528	Zm00001d016798	M1		0.905214328	0.899362886	0.881196252	0.866101912	0.887968845	SORBI_3004G174800
LOC8068870	Zm00001d016799	M1		0.544611476	0.534444594	0.622400205	0.596397553	0.574463457	SORBI_3004G175000
LOC8068871	Zm00001d016800	M1		0.924420149	0.970465613	0.870504428	0.858285201	0.905918848	SORBI_3004G175200
LOC8064259	Zm00001d016801	M1		0.908313283	0.894088888	0.779694519	0.786900636	0.842249332	SORBI_3004G175300
LOC8064261	Zm00001d016802	M1		0.988000693	0.991353724	0.984389395	0.985567963	0.987327944	SORBI_3004G175500
LOC8068872	Zm00001d016803	M1		0.986310704	0.985733259	0.978814383	0.955270734	0.97653227	SORBI_3004G175700
LOC8064264	Zm00001d016804	M1		0.990309617	0.99065309	0.971030676	0.970379742	0.980593282	SORBI_3004G176000
LOC8064269	Zm00001d016806	M1		0.791438415	0.732315747	0.923367418	0.907791041	0.838728155	SORBI_3004G177000
LOC8064268	Zm00001d016807	M1		0.777672127	0.80461956	0.667341438	0.675519372	0.731288124	SORBI_3004G176900
LOC8068880	Zm00001d016810	M1		0.901584124	0.871314457	0.834586917	0.826404093	0.858472398	SORBI_3004G176800
LOC8068879	Zm00001d016811	M1		0.688175851	0.663911612	0.339485731	0.445929919	0.534375779	SORBI_3004G176700
LOC8068877	Zm00001d016814	M1		0.509129405	0.492140974	0.636843794	0.635942571	0.568514186	SORBI_3004G176600
LOC8064267	Zm00001d016815	M1		0.926691433	0.941246896	0.869088264	0.858331041	0.898839409	SORBI_3004G176500
LOC8068876	Zm00001d016816	M1		0.954474236	0.9690297	0.898744705	0.895186754	0.929358849	SORBI_3004G176400
LOC8064266	Zm00001d016817	M1		0.81774296	0.775346948	0.767341805	0.7263445	0.771694053	SORBI_3004G176300
LOC8064270	Zm00001d016824	M1		0.95212981	0.953708159	0.95365878	0.958791279	0.954572007	SORBI_3004G177100
LOC110434458	Zm00001d016835	M1		0.98698439	0.98687275	0.966696616	0.970884354	0.977859527	SORBI_3004G178200
LOC8064276	Zm00001d016836	M1		0.961584509	0.965414894	0.987061995	0.984117205	0.974544651	SORBI_3004G178300
LOC8068887	Zm00001d016837	M1		0.9254557	0.900852694	0.739530227	0.761555641	0.831848566	SORBI_3004G178400
LOC8068904	Zm00001d016839	M1		0.743102419	0.746497796	0.659068156	0.626363753	0.693758031	SORBI_3004G181500
LOC8064294	Zm00001d016845	M1		0.815048217	0.809513727	0.73694556	0.758253826	0.779940332	SORBI_3004G180600
LOC8064291	Zm00001d016849	M1		0.925625084	0.892726118	0.93281992	0.95428058	0.926362926	SORBI_3004G179800
LOC8064289	Zm00001d016853	M1		0.826412334	0.81165284	0.609220896	0.592383153	0.709917306	SORBI_3004G179500
LOC8064288	Zm00001d016854	M1		0.970650396	0.971281735	0.957996406	0.9605378	0.965116584	SORBI_3004G179400
LOC8064287	Zm00001d016855	M1		0.928839528	0.904929455	0.912463098	0.803987507	0.887554897	SORBI_3004G179300
LOC110434960	Zm00001d016858	M1		0.941785845	0.939533809	0.918313153	0.944569742	0.936050637	SORBI_3004G181900
LOC8068911	Zm00001d016860	M1		0.908113102	0.901976787	0.889605222	0.915376717	0.903767957	SORBI_3004G182800
LOC8068912	Zm00001d016863	M1		0.891609724	0.901545628	0.963871133	0.967793608	0.931205023	SORBI_3004G183100
LOC8072593	Zm00001d016864	M1		0.972132504	0.957030393	0.998007958	0.998066145	0.98130925	SORBI_3004G183200
LOC8068913	Zm00001d016865	M1		0.982291687	0.979281273	0.976323108	0.97694776	0.978710957	SORBI_3004G183300
LOC110434604	Zm00001d016866	M1		0.909876234	0.931676708	0.960397528	0.906539597	0.927122517	SORBI_3004G183600
LOC110434329	Zm00001d016873	M1		0.335818913	0.370942968	0.595295854	0.586711162	0.472192224	SORBI_3004G184200
LOC8068916	Zm00001d016876	M1		0.920455027	0.918168344	0.962501604	0.970127925	0.942813225	SORBI_3004G184400
LOC8068918	Zm00001d016878	M1		0.969172136	0.97522761	0.982088307	0.976254653	0.975685676	SORBI_3004G184900
LOC8068922	Zm00001d016885	M1		0.438865898	0.414004966	0.720004564	0.713724627	0.571650014	SORBI_3004G185500
LOC8068924	Zm00001d016890	M1		0.967955652	0.970935268	0.954742652	0.958702349	0.96308398	SORBI_3004G185800
LOC8068925	Zm00001d016891	M1		0.95936712	0.9643062	0.867667822	0.853050223	0.911097841	SORBI_3004G185900
LOC8072605	Zm00001d016892	M1		0.952006621	0.955752315	0.967754817	0.953138236	0.957162997	SORBI_3004G186100
LOC8072606	Zm00001d016893	M1		0.955151772	0.954004581	0.979777949	0.981682161	0.967654116	SORBI_3004G186200
LOC8072607	Zm00001d016894	M1		0.904794718	0.910534522	0.80851532	0.838159415	0.865500994	SORBI_3004G186300
LOC8068926	Zm00001d016896	M1		0.60000385	0.628079225	0.860326017	0.853064892	0.735368496	SORBI_3004G186600
LOC8068928	Zm00001d016898	M1		0.793748195	0.769064347	0.79464767	0.755475691	0.778233976	SORBI_3004G187100
LOC8068932	Zm00001d016901	M1		0.350805536	0.348218582	0.400724483	0.406905404	0.376663501	SORBI_3004G187701
LOC8072616	Zm00001d016908	M1		0.634800685	0.581802783	0.412160552	0.377343822	0.50152696	SORBI_3004G188000
LOC8068935	Zm00001d016911	M1		0.938979462	0.909225646	0.91901767	0.93479656	0.925504835	SORBI_3004G188300
LOC8072619	Zm00001d016918	M1		0.871680172	0.916597694	0.94305224	0.948170966	0.919875268	SORBI_3004G188600
LOC8068937	Zm00001d016922	M1		0.703122694	0.70352049	0.442379384	0.509254268	0.589569209	SORBI_3004G188800
LOC8070393	Zm00001d016926	M1		0.996777857	0.996781707	0.983461687	0.951759152	0.982195101	SORBI_3004G189800
LOC8070546	Zm00001d016934	M1		0.387226917	0.3978981	0.681127797	0.796354768	0.565651896	SORBI_3004G190200
LOC8055402	Zm00001d016949	M1		0.986291456	0.961907878	0.957161397	0.955031447	0.965098044	SORBI_3004G191500
LOC8055403	Zm00001d016972	M1		0.886478163	0.900771851	0.912351859	0.884935609	0.896134371	SORBI_3004G192200
LOC8070559	Zm00001d016974	M1		0.731888438	0.735576386	0.890527532	0.887209601	0.811300489	SORBI_3004G192500
LOC8055406	Zm00001d016979	M1		0.798552538	0.7926472	0.249541494	0.286249702	0.531747734	SORBI_3004G192800
LOC8070561	Zm00001d016982	M1		0.860804958	0.848759456	0.866918239	0.866918239	0.860850223	SORBI_3004G193000
LOC8070563	Zm00001d016988	M1		0.926464304	0.926464304	0.965427345	0.962567065	0.945230755	SORBI_3004G193200
LOC8070564	Zm00001d016990	M1		0.978603738	0.979038747	0.970684123	0.960397528	0.972181034	SORBI_3004G193300
LOC8070565	Zm00001d016991	M1		0.997513137	0.998390853	0.998725025	0.998721602	0.998337654	SORBI_3004G193400
LOC8055409	Zm00001d016995	M1		0.912509383	0.912509383	0.87195482	0.861943268	0.889729214	SORBI_3004G193800
LOC110434379	Zm00001d016997	M1		0.272534791	0.267866041	0.324528302	0.349508692	0.303609457	SORBI_3004G193900
LOC8055413	Zm00001d017000	M1		0.95286124	0.954339499	0.924633837	0.945010625	0.9442113	SORBI_3004G194900
LOC8055419	Zm00001d017019	M1		0.99656741	0.994480054	0.988929534	0.981549223	0.990381555	SORBI_3004G195800
LOC8070573	Zm00001d017029	M1		0.965765211	0.947687333	0.989226886	0.99124631	0.973481435	SORBI_3004G196700
LOC8070575	Zm00001d017030	M1		0.746690278	0.740723346	0.765989247	0.723501476	0.744226087	SORBI_3004G196800
LOC8070581	Zm00001d017037	M1		0.857910034	0.859461436	0.940331151	0.940331151	0.899508443	SORBI_3004G197700
LOC8055431	Zm00001d017042	M1		0.842114989	0.830623833	0.952849442	0.936177641	0.890441476	SORBI_3004G198000
LOC8055432	Zm00001d017043	M1		0.997051181	0.997066579	0.997942681	0.99821589	0.997569083	SORBI_3004G198100
LOC8070583	Zm00001d017045	M1		0.968844918	0.969718784	0.997649302	0.983904505	0.980029377	SORBI_3004G198200
LOC8070584	Zm00001d017046	M1		0.89848132	0.908682848	0.870831729	0.888807599	0.891700874	SORBI_3004G198300
LOC8055438	Zm00001d017053	M1		0.767385906	0.7632514	0.695637824	0.695227827	0.730375739	SORBI_3004G198800
LOC8055443	Zm00001d017065	M1		0.341081362	0.318306931	0.792328144	0.868700352	0.580104197	SORBI_3004G199600
LOC8055817	Zm00001d017069	M1		0.986021981	0.941385483	0.969436529	0.967275631	0.966029906	SORBI_3004G199900
LOC8070589	Zm00001d017072	M1		0.96997286	0.973060266	0.969404258	0.971009284	0.970861667	SORBI_3004G200200
LOC8070605	Zm00001d017094	M1		0.809889708	0.788628183	0.951341291	0.946168656	0.87400696	SORBI_3004G202300
LOC8056477	Zm00001d017097	M1		0.986287606	0.986815006	0.901655757	0.891404612	0.941540745	SORBI_3004G202600
LOC8056478	Zm00001d017099	M1		0.93732412	0.943841549	0.940279077	0.925022462	0.936616802	SORBI_3004G202700
LOC8056481	Zm00001d017101	M1		0.673997652	0.645691298	0.730013263	0.703726522	0.688357184	SORBI_3004G203200
LOC8056482	Zm00001d017103	M1		0.858298847	0.802979616	0.844549572	0.849470186	0.838824555	SORBI_3004G203400
LOC8070610	Zm00001d017110	M1		0.7385868	0.758139087	0.764458991	0.767002219	0.757046774	SORBI_3004G203800
LOC8056485	Zm00001d017112	M1		0.72651435	0.729274537	0.929710105	0.915218414	0.825179351	SORBI_3004G204000
LOC8056486	Zm00001d017113	M1		0.98330414	0.983442727	0.990829875	0.994386685	0.987990857	SORBI_3004G204100
LOC8070612	Zm00001d017114	M1		0.971466518	0.970515658	0.952875112	0.943883969	0.959685314	SORBI_3004G204200
LOC8070615	Zm00001d017117	M1		0.996812504	0.994999326	0.956869648	0.934693878	0.970843839	SORBI_3004G204800
LOC110434917	Zm00001d017118	M1		0.986083576	0.992200643	0.998280067	0.99817168	0.993683991	SORBI_3004G204500
LOC110434344	Zm00001d017119	M1		0.960718342	0.974030374	0.950304482	0.952586318	0.959409879	SORBI_3004G204900
LOC8070616	Zm00001d017124	M1		0.783558216	0.791677093	0.84819407	0.834206135	0.814408879	SORBI_3004G205200
LOC8056490	Zm00001d017125	M1		0.970103748	0.934152022	0.880400462	0.889006546	0.918415694	SORBI_3004G205500
LOC8072149	Zm00001d017126	M1		0.958312321	0.948099244	0.929730886	0.911769991	0.93697811	SORBI_3004G205600
LOC8072422	Zm00001d017128	M1		0.993794391	0.988043039	0.979191375	0.952417625	0.978361607	SORBI_3004G205800
LOC8072424	Zm00001d017130	M1		0.93228495	0.931819144	0.931363111	0.915479399	0.927736651	SORBI_3004G206200
LOC8072425	Zm00001d017131	M1		0.935099032	0.921779301	0.974538387	0.973606909	0.951255907	SORBI_3004G206300
LOC8072427	Zm00001d017135	M1		0.087652301	0.098523666	0.213556953	0.232922603	0.158163881	SORBI_3004G206900
LOC8072429	Zm00001d017138	M1		0.683560141	0.598864358	0.727705044	0.675452445	0.671395497	SORBI_3004G207200
LOC8072432	Zm00001d017139	M1		0.972417377	0.952102862	0.935482333	0.924547555	0.946137532	SORBI_3004G207400
LOC110434296	Zm00001d017141	M1		0.984366639	0.983997074	0.929540495	0.909921705	0.951956478	SORBI_3004G207700
LOC8056502	Zm00001d017150	M1		0.940592459	0.965919196	0.914605171	0.906182347	0.931824793	SORBI_3004G208500
LOC8056503	Zm00001d017152	M1		0.991188189	0.983825124	0.970629929	0.971082018	0.979181315	SORBI_3004G208700
LOC8072437	Zm00001d017153	M1		0.937774527	0.938494408	0.926594789	0.950799641	0.938415841	SORBI_3004G208900
LOC8056504	Zm00001d017157	M1		0.823328778	0.824506766	0.843217958	0.851649339	0.83567571	SORBI_3004G209000
LOC110434878	Zm00001d017164	M1		0.980235983	0.980855773	0.979964061	0.979276455	0.980083068	SORBI_3004G209600
LOC110434967	Zm00001d017165	M1		0.987153774	0.985648567	0.971793665	0.965986395	0.9776456	SORBI_3004G209700
LOC8072440	Zm00001d017166	M1		0.875002406	0.869247204	0.903133245	0.896220914	0.885900942	SORBI_3004G209800
LOC8056509	Zm00001d017167	M1		0.856528016	0.816384039	0.885365898	0.893064647	0.86283565	SORBI_3004G209900
LOC8072441	Zm00001d017169	M1		0.965176217	0.943317999	0.960977766	0.966551149	0.959005783	SORBI_3004G210101
LOC8072442	Zm00001d017170	M1		0.770750486	0.780713337	0.919973188	0.920299063	0.847934019	SORBI_3004G210200
LOC8056939	Zm00001d017171	M1		0.871222066	0.86551306	0.723216247	0.724393531	0.796086226	SORBI_3004G210500
LOC8072446	Zm00001d017174	M1		0.942832945	0.94162416	0.885334931	0.884050828	0.913460716	SORBI_3004G210800
LOC8059667	Zm00001d017175	M1		0.992508614	0.991411468	0.996426076	0.996367604	0.99417844	SORBI_3004G211100
LOC8072448	Zm00001d017179	M1		0.989170981	0.990610744	0.985080221	0.984437171	0.987324779	SORBI_3004G211600
LOC8059671	Zm00001d017185	M1		0.997524686	0.996874098	0.993344885	0.994857314	0.995650246	SORBI_3004G212100
LOC8059672	Zm00001d017186	M1		0.991361423	0.990483706	0.997516365	0.999015959	0.994594363	SORBI_3004G212300
LOC8072456	Zm00001d017195	M1		0.810675033	0.776263161	0.859213623	0.842504171	0.822163997	SORBI_3004G212900
LOC8059677	Zm00001d017199	M1		0.79233923	0.803541663	0.900333718	0.905637559	0.850463042	SORBI_3004G213100
LOC110434682	Zm00001d017203	M1		0.96146517	0.955074779	0.93423694	0.923225517	0.943500602	SORBI_3004G213600
LOC8072461	Zm00001d017208	M1		0.480049275	0.481639174	0.979329996	0.976081376	0.729274955	SORBI_3004G214400
LOC8072462	Zm00001d017209	M1		0.884287722	0.811814525	0.901026826	0.851360544	0.862122404	SORBI_3004G214500
LOC8072463	Zm00001d017210	M1		0.90666179	0.872731122	0.63539982	0.640499722	0.763823114	SORBI_3004G214700
LOC8072468	Zm00001d017213	M1		0.904047889	0.896414067	0.725408438	0.747073546	0.818235985	SORBI_3004G215100
LOC8059685	Zm00001d017214	M1		0.797074279	0.786125922	0.719208061	0.66152612	0.740983595	SORBI_3004G215200
LOC8072473	Zm00001d017215	M1		0.977406502	0.977406502	0.942409333	0.941627804	0.959712535	SORBI_3004G215800
LOC8059688	Zm00001d017216	M1		0.999337863	0.999337863	0.997109485	0.998759252	0.998636116	SORBI_3004G215900
LOC8072478	Zm00001d017240	M1		0.868357939	0.829433441	0.544417348	0.519143884	0.690338153	SORBI_3004G216600
LOC8072485	Zm00001d017249	M1		0.649475487	0.605316344	0.766611047	0.631783927	0.663296701	SORBI_3004G217800
LOC8072486	Zm00001d017250	M1		0.900386888	0.900386888	0.947395713	0.955380751	0.92588756	SORBI_3004G217900
LOC8072487	Zm00001d017251	M1		0.947748927	0.947748927	0.805860242	0.782976695	0.871083698	SORBI_3004G218100
LOC8072488	Zm00001d017252	M1		0.98204916	0.968448405	0.987821112	0.969074207	0.976848221	SORBI_3004G218300
LOC8066163	Zm00001d017264	M1		0.530460224	0.597685515	0.623969965	0.600978337	0.58827351	SORBI_3004G219700
LOC8066171	Zm00001d017281	M1		0.911627817	0.922564626	0.785896547	0.876775767	0.874216189	SORBI_3004G221000
LOC110434404	Zm00001d017282	M1		0.990425962	0.949993263	0.96625777	0.979668849	0.971586461	SORBI_3004G221300
LOC8074779	Zm00001d017291	M1		0.589217177	0.56472581	0.740172727	0.749833141	0.660987214	SORBI_3004G222100
LOC8066182	Zm00001d017308	M1		0.981664196	0.982638154	0.984201144	0.982138365	0.982660465	SORBI_3004G223600
LOC8066184	Zm00001d017317	M1		0.932207957	0.95202587	0.989529229	0.993308518	0.966767893	SORBI_3004G223800
LOC8074787	Zm00001d017320	M1		0.970827479	0.974846496	0.988204338	0.986762504	0.980160204	SORBI_3004G223900
LOC110434628	Zm00001d017324	M1		0.901280003	0.904063288	0.932467866	0.924738801	0.91563749	SORBI_3004G224100
LOC8074789	Zm00001d017331	M1		0.958797375	0.967543741	0.946040303	0.945991814	0.954593308	SORBI_3004G224600
LOC8074797	Zm00001d017345	M1		0.971031509	0.972467422	0.941008856	0.939442947	0.955987684	SORBI_3004G225600
LOC8074796	Zm00001d017347	M1		0.81155275	0.833337825	0.904398848	0.91262354	0.865478241	SORBI_3004G225500
LOC8074794	Zm00001d017351	M1		0.885592747	0.861717321	0.91324422	0.915972642	0.894131733	SORBI_3004G225300
LOC8074800	Zm00001d017357	M1		0.8115489	0.834573557	0.679604672	0.693543833	0.75481774	SORBI_3004G226200
LOC8066197	Zm00001d017363	M1		0.958504802	0.960810733	0.886760365	0.906635862	0.92817794	SORBI_3004G227100
LOC8066199	Zm00001d017365	M1		0.392724193	0.408257463	0.926653831	0.931222636	0.664714531	SORBI_3004G227300
LOC8074807	Zm00001d017377	M1		0.800604392	0.78173734	0.848150797	0.836246952	0.81668487	SORBI_3004G227900
LOC8074809	Zm00001d017378	M1		0.702954594	0.736080688	0.854068797	0.82187139	0.778743867	SORBI_3004G228100
LOC8075181	Zm00001d017380	M1		0.314499644	0.28703251	0.65017071	0.661783539	0.478371601	SORBI_3004G304800
LOC8075169	Zm00001d017395	M1		0.943768406	0.928177391	0.832647357	0.808002824	0.878148994	SORBI_3004G302500
LOC110434652	Zm00001d017398	M1		0.97301407	0.962319789	0.94230339	0.9191426	0.949194963	SORBI_3004G301900
LOC8078883	Zm00001d017399	M1		0.507516409	0.508193945	0.56147977	0.536765865	0.528488997	SORBI_3004G301800
LOC110434350	Zm00001d017409	M1		0.859253556	0.834731392	0.842671031	0.928164977	0.866205239	SORBI_3004G301100
LOC8075160	Zm00001d017417	M1		0.808053433	0.79086482	0.916065546	0.943216532	0.864550083	SORBI_3004G300900
LOC8078880	Zm00001d017418	M1		0.954381845	0.978126383	0.855638557	0.846349777	0.908624141	SORBI_3004G300800
LOC8075156	Zm00001d017422	M1		0.965942294	0.959775181	0.897132018	0.87344005	0.924072386	SORBI_3004G300300
LOC8075154	Zm00001d017425	M1		0.773252748	0.71695186	0.92683866	0.902352531	0.82984895	SORBI_3004G299850
LOC8076252	Zm00001d017432	M1		0.888537717	0.867915231	0.503515452	0.515358177	0.693831644	SORBI_3004G299000
LOC8077677	Zm00001d017435	M1		0.980382269	0.979134987	0.960852265	0.956608052	0.969244393	SORBI_3004G298900
LOC8076251	Zm00001d017438	M1		0.377652879	0.343314149	0.512956545	0.452556368	0.421619985	SORBI_3004G298700
LOC8076249	Zm00001d017441	M1		0.673851366	0.646842338	0.865963291	0.902502888	0.772289971	SORBI_3004G298500
LOC8076247	Zm00001d017445	M1		0.904552191	0.891555829	0.946361186	0.94209558	0.921141197	SORBI_3004G298300
LOC8073975	Zm00001d017449	M1		0.999411006	0.999599638	0.997772358	0.997910409	0.998673353	SORBI_3004G298100
LOC8076245	Zm00001d017454	M1		0.96461802	0.915962505	0.98487999	0.985938904	0.962849855	SORBI_3004G297950
LOC8073971	Zm00001d017457	M1		0.983927781	0.981331417	0.992752321	0.993649082	0.98791515	SORBI_3004G297600
LOC8073970	Zm00001d017458	M1		0.799541894	0.829461244	0.602216232	0.657450905	0.722167569	SORBI_3004G297500
LOC8073969	Zm00001d017459	M1		0.838496333	0.844644198	0.689032217	0.70655885	0.769682899	SORBI_3004G297400
LOC8073968	Zm00001d017462	M1		0.943976286	0.975873492	0.996363325	0.996241084	0.978113547	SORBI_3004G297100
LOC8073966	Zm00001d017467	M1		0.99443728	0.99386839	0.940812048	0.941316904	0.967608655	SORBI_3004G296800
LOC8073965	Zm00001d017468	M1		0.933901796	0.937173984	0.769537501	0.764311385	0.851231166	SORBI_3004G296700
LOC8076240	Zm00001d017469	M1		0.943860797	0.920327989	0.681595573	0.612313353	0.789524428	SORBI_3004G296600
LOC8073964	Zm00001d017470	M1		0.910003272	0.915358112	0.789305609	0.774175331	0.847210581	SORBI_3004G296500
LOC8073960	Zm00001d017475	M1		0.943583624	0.946058938	0.973775602	0.968981303	0.958099867	SORBI_3004G295900
LOC8073959	Zm00001d017476	M1		0.908678998	0.906761881	0.866629587	0.844196295	0.88156669	SORBI_3004G295800
LOC8073954	Zm00001d017492	M1		0.878551768	0.852258772	0.664180281	0.688481011	0.770867958	SORBI_3004G294700
LOC110434966	Zm00001d017502	M1		0.847654611	0.682039536	0.826370171	0.810916442	0.79174519	SORBI_3004G293500
LOC8076221	Zm00001d017503	M1		0.625218948	0.631343715	0.404120139	0.384462842	0.511286411	SORBI_3004G293400
LOC8076218	Zm00001d017512	M1		0.883791119	0.891378746	0.911006289	0.89911803	0.896323546	SORBI_3004G291400
LOC8076215	Zm00001d017514	M1		0.631366812	0.640806113	0.610595559	0.623636247	0.626601183	SORBI_3004G290600
LOC8076065	Zm00001d017522	M1		0.875980213	0.876157296	0.971208537	0.960225902	0.920892987	SORBI_3004G290000
LOC8073927	Zm00001d017528	M1		0.983242546	0.982869132	0.942837177	0.955940615	0.966222367	SORBI_3004G288500
LOC8076060	Zm00001d017531	M1		0.6477701	0.637676361	0.64036709	0.633470855	0.639821102	SORBI_3004G288300
LOC8076055	Zm00001d017536	M1		0.617400343	0.638981387	0.849236298	0.805525606	0.727785909	SORBI_3004G287600
LOC8073923	Zm00001d017537	M1		0.833576502	0.83947029	0.946403359	0.96780901	0.89681479	SORBI_3004G287500
LOC8076052	Zm00001d017544	M1		0.975308452	0.968044194	0.994720404	0.994675908	0.983187239	SORBI_3004G287100
LOC8076051	Zm00001d017545	M1		0.688237445	0.760448867	0.789699653	0.771171865	0.752389458	SORBI_3004G287000
LOC8076049	Zm00001d017551	M1		0.932550575	0.948842223	0.613124118	0.556583604	0.76277513	SORBI_3004G286400
LOC8073918	Zm00001d017553	M1		0.761499817	0.737270225	0.81152612	0.782925353	0.773305379	SORBI_3004G286200
LOC8073916	Zm00001d017557	M1		0.632379266	0.676195792	0.672438895	0.752932871	0.683486706	SORBI_3004G285800
LOC8073915	Zm00001d017559	M1		0.66760726	0.672434701	0.899786934	0.752130664	0.74798989	SORBI_3004G285600
LOC8073914	Zm00001d017560	M1		0.681958693	0.678278444	0.810028666	0.796055277	0.74158027	SORBI_3004G285400
LOC110434369	Zm00001d017564	M1		0.96072989	0.955783112	0.928802464	0.926294442	0.942902477	SORBI_3004G285200
LOC8073912	Zm00001d017566	M1		0.984493677	0.984208804	0.975535875	0.9737646	0.979500739	SORBI_3004G285000
LOC8076042	Zm00001d017573	M1		0.794237099	0.802074952	0.764435154	0.739103524	0.774962682	SORBI_3004G284600
LOC110434916	Zm00001d017574	M1		0.987646527	0.969587897	0.97837676	0.939525093	0.968784069	SORBI_3004G284500
LOC8073907	Zm00001d017584	M1		0.91936558	0.8648629	0.982488952	0.98307571	0.937448286	SORBI_3004G283600
LOC8073221	Zm00001d017595	M1		0.965022232	0.96986892	0.940232319	0.956693621	0.957954273	SORBI_3004G283000
LOC8073220	Zm00001d017597	M1		0.753099917	0.818197217	0.598713615	0.638588114	0.702149716	SORBI_3004G282900
LOC8073218	Zm00001d017601	M1		0.937543549	0.93910265	0.945501219	0.89689813	0.929761387	SORBI_3004G282700
LOC8073216	Zm00001d017604	M1		0.77774527	0.758751179	0.773935738	0.758230192	0.767165595	SORBI_3004G282400
LOC8076035	Zm00001d017607	M1		0.795438185	0.797051181	0.933835337	0.783930176	0.82756372	SORBI_3004G282000
LOC8076033	Zm00001d017609	M1		0.917452313	0.883725675	0.7517563	0.598498267	0.787858139	SORBI_3004G281800
LOC110434900	Zm00001d017613	M1		0.859380594	0.8509191	0.870822459	0.867103068	0.862056305	SORBI_3004G281300
LOC8076027	Zm00001d017616	M1		0.903362655	0.910195754	0.832620973	0.74877606	0.84873886	SORBI_3004G280800
LOC8076026	Zm00001d017617	M1		0.994279445	0.994715309	0.991406751	0.991071749	0.992868314	SORBI_3004G280700
LOC8073207	Zm00001d017620	M1		0.267326237	0.346135931	0.326869465	0.368082831	0.327103616	SORBI_3004G280200
LOC8076025	Zm00001d017621	M1		0.975085173	0.943710662	0.939596971	0.924656655	0.945762365	SORBI_3004G280100
LOC110434303	Zm00001d017640	M1		0.866344581	0.874178584	0.757720447	0.765755359	0.815999743	SORBI_3004G279500
LOC110434471	Zm00001d017643	M1		0.600227128	0.580836525	0.462003166	0.406657254	0.512431018	SORBI_3004G279200
LOC8078384	Zm00001d017651	M1		0.960710642	0.959994611	0.96638429	0.965274951	0.963091123	SORBI_3004G277400
LOC8078383	Zm00001d017653	M1		0.811310223	0.837083518	0.473138522	0.450203226	0.642933872	SORBI_3004G277300
LOC8073195	Zm00001d017654	M1		0.994102362	0.991977364	0.96748556	0.945991814	0.974889275	SORBI_3004G277200
LOC8073896	Zm00001d017666	M1		0.651142379	0.63947799	0.690530099	0.77228212	0.688358147	SORBI_3004G276200
LOC8073189	Zm00001d017670	M1		0.745000289	0.754089273	0.849634193	0.839558465	0.797070555	SORBI_3004G275900
LOC8073187	Zm00001d017675	M1		0.995834697	0.998271515	0.996113464	0.995404954	0.996406158	SORBI_3004G275700
LOC8073186	Zm00001d017676	M1		0.796196562	0.80808423	0.935245796	0.930780938	0.867576882	SORBI_3004G275600
LOC8073894	Zm00001d017678	M1		0.86477393	0.9265105	0.917468874	0.914227955	0.905745315	SORBI_3004G275400
LOC8073893	Zm00001d017684	M1		0.917675591	0.905287471	0.842437244	0.86243101	0.881957829	SORBI_3004G275100
LOC8073184	Zm00001d017685	M1		0.731592016	0.706323023	0.736182775	0.756907543	0.732751339	SORBI_3004G275000
LOC8073891	Zm00001d017689	M1		0.80084307	0.774611668	0.533995066	0.523153089	0.658150723	SORBI_3004G274700
LOC110434926	Zm00001d017691	M1		0.967324312	0.94183589	0.97851367	0.979326573	0.966750111	SORBI_3004G274400
LOC110435074	Zm00001d017692	M1		0.773245048	0.781999115	0.973488641	0.975758354	0.876122789	SORBI_3004G274200
LOC8073886	Zm00001d017697	M1		0.479860643	0.487486767	0.86945621	0.86111325	0.674479218	SORBI_3004G273550
LOC8073883	Zm00001d017700	M1		0.756395203	0.819644679	0.919871647	0.931927865	0.856959849	SORBI_3004G273100
LOC110434565	Zm00001d017704	M1		0.989282621	0.993636556	0.919362798	0.910169854	0.953112957	SORBI_3004G272800
LOC8073177	Zm00001d017708	M1		0.940111254	0.936084538	0.956109614	0.949294057	0.945399866	SORBI_3004G272300
LOC110434321	Zm00001d017709	M1		0.947371663	0.934144323	0.951009406	0.914285714	0.936702777	SORBI_3004G272200
LOC110434320	Zm00001d017711	M1		0.997863454	0.997817258	0.999318302	0.999512258	0.998627818	SORBI_3004G272100
LOC8073876	Zm00001d017721	M1		0.978665332	0.974711759	0.985091773	0.989308176	0.98194426	SORBI_3004G271000
LOC110434575	Zm00001d017725	M1		0.543537428	0.530029065	0.884754204	0.885252214	0.710893228	SORBI_3004G270800
LOC8073875	Zm00001d017726	M1		0.772455874	0.70992628	0.760587002	0.725901681	0.742217709	SORBI_3004G270600
LOC8073874	Zm00001d017727	M1		0.765049179	0.747171482	0.615254781	0.63748556	0.691240251	SORBI_3004G270500
LOC8073169	Zm00001d017728	M1		0.621130637	0.642665486	0.451575179	0.438901296	0.53856815	SORBI_3004G270400
LOC8073873	Zm00001d017729	M1		0.950035609	0.93732797	0.892876396	0.917001098	0.924310268	SORBI_3004G270200
LOC8073872	Zm00001d017730	M1		0.939044906	0.92135969	0.607565506	0.71576035	0.795932613	SORBI_3004G270100
LOC8073167	Zm00001d017746	M1		0.879133063	0.852951706	0.967726294	0.968069384	0.916970112	SORBI_3004G269800
LOC8073870	Zm00001d017751	M1		0.98645314	0.987881354	0.989515375	0.988129893	0.987994941	SORBI_3004G269600
LOC8073869	Zm00001d017753	M1		0.800920062	0.794302543	0.603465537	0.627563856	0.706562999	SORBI_3004G269400
LOC8073868	Zm00001d017754	M1		0.981213789	0.979723981	0.98240919	0.989970112	0.983329268	SORBI_3004G269200
LOC8073164	Zm00001d017756	M1		0.84178007	0.821380863	0.687008086	0.699383905	0.762388231	SORBI_3004G269000
LOC8073865	Zm00001d017761	M1		0.956229669	0.946928527	0.889145595	0.852918202	0.911305499	SORBI_3004G268900
LOC8073160	Zm00001d017771	M1		0.734060914	0.721425134	0.652342446	0.599438098	0.676816648	SORBI_3004G267800
LOC110434526	Zm00001d017777	M1		0.816938387	0.838885146	0.762372538	0.746290592	0.791121666	SORBI_3004G267500
LOC8073857	Zm00001d017780	M1		0.988535792	0.983931631	0.922962393	0.929700937	0.956282688	SORBI_3004G267300
LOC8073158	Zm00001d017782	M1		0.810886763	0.813800935	0.909636475	0.910942113	0.861316572	SORBI_3004G267000
LOC8073853	Zm00001d017787	M1		0.915127134	0.924731969	0.881261855	0.890375342	0.902874075	SORBI_3004G266400
LOC8073848	Zm00001d017801	M1		0.573345139	0.52314592	0.779068156	0.76663957	0.660549696	SORBI_3004G265000
LOC8073847	Zm00001d017802	M1		0.893553789	0.875776182	0.95012764	0.950038506	0.917374029	SORBI_3004G264900
LOC8071796	Zm00001d017806	M1		0.877712548	0.867117074	0.763188294	0.769843409	0.819465331	SORBI_3004G264000
LOC8073842	Zm00001d017808	M1		0.971889977	0.971889977	0.877914077	0.885979549	0.926918395	SORBI_3004G263600
LOC8073841	Zm00001d017810	M1		0.906835024	0.925548092	0.805733111	0.820145039	0.864565316	SORBI_3004G263400
LOC110434914	Zm00001d017811	M1		0.899717052	0.889738802	0.922266433	0.926413668	0.909533989	SORBI_3004G263300
LOC8071792	Zm00001d017812	M1		0.99390988	0.99390988	0.9791371	0.994600608	0.990389367	SORBI_3004G263200
LOC8073839	Zm00001d017814	M1		0.640586684	0.615402383	0.732556796	0.801925298	0.69761779	SORBI_3004G263000
LOC8073838	Zm00001d017817	M1		0.472838912	0.453852521	0.739057887	0.826004364	0.622938421	SORBI_3004G262900
LOC8073836	Zm00001d017818	M1		0.978919408	0.980440013	0.905155521	0.909472468	0.943496853	SORBI_3004G262700
LOC8073834	Zm00001d017820	M1		0.695724982	0.598540989	0.91731485	0.898857656	0.777609619	SORBI_3004G262600
LOC8073833	Zm00001d017823	M1		0.976625026	0.978172579	0.988576563	0.98224447	0.98140466	SORBI_3004G262300
LOC8071784	Zm00001d017836	M1		0.949635247	0.945204747	0.750038506	0.778864502	0.855935751	SORBI_3004G261300
LOC8071783	Zm00001d017837	M1		0.979327469	0.98730006	0.987190348	0.99105378	0.986217914	SORBI_3004G261200
LOC8079387	Zm00001d017847	M1		0.998706523	0.99884511	0.999443803	0.998394159	0.998847399	SORBI_3004G260200
LOC8071779	Zm00001d017849	M1		0.99327854	0.993863684	0.918860794	0.909222179	0.953806299	SORBI_3004G259900
LOC8071776	Zm00001d017853	M1		0.906704136	0.895270725	0.917654987	0.904552872	0.90604568	SORBI_3004G259300
LOC8071772	Zm00001d017863	M1		0.734683271	0.719315535	0.924970407	0.926345213	0.826328607	SORBI_3004G258600
LOC8071767	Zm00001d017865	M1		0.58666487	0.645556561	0.839716156	0.870979335	0.735729231	SORBI_3004G257800
LOC8071766	Zm00001d017869	M1		0.923365349	0.857559717	0.978352311	0.931144911	0.922605572	SORBI_3004G257700
LOC8077724	Zm00001d017871	M1		0.997605528	0.998044386	0.996996534	0.996470286	0.997279184	SORBI_3004G257600
LOC8071763	Zm00001d017878	M1		0.89669124	0.892256463	0.919978893	0.923021068	0.907986916	SORBI_3004G256900
LOC8077720	Zm00001d017880	M1		0.725166978	0.721806248	0.749289473	0.705914232	0.725544233	SORBI_3004G256800
LOC8071758	Zm00001d017886	M1		0.527392066	0.473624237	0.353844179	0.333880974	0.422185364	SORBI_3004G256100
LOC8077718	Zm00001d017889	M1		0.515161781	0.53921044	0.664065375	0.662642793	0.595270097	SORBI_3004G255800
LOC8071755	Zm00001d017894	M1		0.946570939	0.946570939	0.830861821	0.832280837	0.889071134	SORBI_3004G255300
LOC8077712	Zm00001d017897	M1		0.923723365	0.89092064	0.989089976	0.988865357	0.948149835	SORBI_3004G254600
LOC8077707	Zm00001d017906	M1		0.838226859	0.822266279	0.810925427	0.858639089	0.832514413	SORBI_3004G253500
LOC110435059	Zm00001d017907	M1		0.993971474	0.973391334	0.936356765	0.982305591	0.971506291	SORBI_3004G253400
LOC8071745	Zm00001d017908	M1		0.849325352	0.816722807	0.355479766	0.350981902	0.593127457	SORBI_3004G253300
LOC8077702	Zm00001d017912	M1		0.904348161	0.868519624	0.918151714	0.912471655	0.900872788	SORBI_3004G252400
LOC8071739	Zm00001d017915	M1		0.985255904	0.985752507	0.972939472	0.975016757	0.97974116	SORBI_3004G252000
LOC110435107	Zm00001d017930	M1		0.956499143	0.981040556	0.979777949	0.977225003	0.973635663	SORBI_3004G250200
LOC8077692	Zm00001d017931	M1		0.819983447	0.835766943	0.735746374	0.750261698	0.785439615	SORBI_3004G250100
LOC110434910	Zm00001d017932	M1		0.551098108	0.556237368	0.643072491	0.606122449	0.589132604	SORBI_3004G250000
LOC8077691	Zm00001d017936	M1		0.939094951	0.937936212	0.796875516	0.673501476	0.836852039	SORBI_3004G249700
LOC8077686	Zm00001d017945	M1		0.863141686	0.862818317	0.880742737	0.853934026	0.865159192	SORBI_3004G248800
LOC8077684	Zm00001d017946	M1		0.994806845	0.992393125	0.996361186	0.997898674	0.995364957	SORBI_3004G248600
LOC8068618	Zm00001d017955	M1		0.799976902	0.815598714	0.756881872	0.75773756	0.782548762	SORBI_3004G247300
LOC8068616	Zm00001d017957	M1		0.921040171	0.931984678	0.851429305	0.833816797	0.884567738	SORBI_3004G247100
LOC8068613	Zm00001d017961	M1		0.933270456	0.913541085	0.886997818	0.876549865	0.902589806	SORBI_3004G246500
LOC8075746	Zm00001d017964	M1		0.80146671	0.79222759	0.824150943	0.828203483	0.811512182	SORBI_3004G246400
LOC8068612	Zm00001d017966	M1		0.836332839	0.847277347	0.901202242	0.901102412	0.87147871	SORBI_3004G246200
LOC8075744	Zm00001d017967	M1		0.983230997	0.981005909	0.973476518	0.970293929	0.977001838	SORBI_3004G246000
LOC8068611	Zm00001d017968	M1		0.667314688	0.619513791	0.790007701	0.842880246	0.729929107	SORBI_3004G245900
LOC8068609	Zm00001d017976	M1		0.96525321	0.95944839	0.950553202	0.963136953	0.959597939	SORBI_3004G245100
LOC8075739	Zm00001d017982	M1		0.979777876	0.97773757	0.983767595	0.983767595	0.981262659	SORBI_3004G244400
LOC8075738	Zm00001d017983	M1		0.992481666	0.995155878	0.959317731	0.999183673	0.986534737	SORBI_3004G244300
LOC8075732	Zm00001d017987	M1		0.935480146	0.942821396	0.878740427	0.950038506	0.926770119	SORBI_3004G243800
LOC8075731	Zm00001d017988	M1		0.932092468	0.934529286	0.791995893	0.817910776	0.869132106	SORBI_3004G243600
LOC110434514	Zm00001d017989	M1		0.817281004	0.698435124	0.753981089	0.943819792	0.803379252	SORBI_3004G243500
LOC8075729	Zm00001d017991	M1		0.975731912	0.972045246	0.992432294	0.991503016	0.982928117	SORBI_3004G243100
LOC8068601	Zm00001d017992	M1		0.938983312	0.930387936	0.821785821	0.774175331	0.8663331	SORBI_3004G243000
LOC8068600	Zm00001d017994	M1		0.561688449	0.576106181	0.550050058	0.546924107	0.558692199	SORBI_3004G242900
LOC8068599	Zm00001d017995	M1		0.886058553	0.885196235	0.921598181	0.901168014	0.898505246	SORBI_3004G242700
LOC8075728	Zm00001d017997	M1		0.777722172	0.787404	0.939639755	0.936240534	0.860251615	SORBI_3004G242500
LOC8075725	Zm00001d018001	M1		0.824549112	0.827578773	0.571418303	0.608593249	0.708034859	SORBI_3004G242200
LOC8068593	Zm00001d018006	M1		0.641229573	0.667761246	0.485958157	0.426676935	0.555406478	SORBI_3004G241500
LOC8068592	Zm00001d018009	M1		0.987115277	0.987377052	0.797574124	0.804023874	0.894022582	SORBI_3004G241300
LOC8075720	Zm00001d018016	M1		0.590999557	0.562708602	0.605767338	0.616634578	0.594027519	SORBI_3004G241200
LOC8075719	Zm00001d018017	M1		0.978353512	0.973431114	0.925606469	0.913887819	0.947819729	SORBI_3004G241100
LOC8068591	Zm00001d018019	M1		0.942012973	0.942012973	0.854113721	0.818328841	0.889117127	SORBI_3004G241000
LOC8068590	Zm00001d018025	M1		0.943968587	0.944349701	0.98619775	0.99621358	0.967682404	SORBI_3004G240800
LOC8068583	Zm00001d018030	M1		0.991846477	0.991597106	0.982197407	0.982883384	0.987131093	SORBI_3004G239100
LOC8075712	Zm00001d018032	M1		0.809912806	0.825053414	0.640288652	0.665757192	0.735253016	SORBI_3004G238700
LOC8075711	Zm00001d018034	M1		0.996023329	0.996901045	0.996937859	0.997515652	0.996844471	SORBI_3004G238500
LOC8066438	Zm00001d018036	M1		0.968879564	0.982711297	0.907847516	0.852042956	0.927870333	SORBI_3004G238200
LOC8075709	Zm00001d018042	M1		0.589613689	0.577314111	0.548290763	0.610465067	0.581420907	SORBI_3004G237500
LOC8066432	Zm00001d018043	M1		0.914461148	0.894088888	0.954331921	0.96625451	0.932284117	SORBI_3004G237400
LOC8075708	Zm00001d018049	M1		0.836975728	0.825546167	0.623312613	0.626825825	0.728165083	SORBI_3004G237200
LOC8075706	Zm00001d018057	M1		0.952957481	0.948811426	0.90337569	0.907728698	0.928218324	SORBI_3004G236800
LOC8066428	Zm00001d018065	M1		0.943687564	0.951209747	0.94936893	0.948998845	0.948316271	SORBI_3004G235700
LOC8066427	Zm00001d018066	M1		0.968998903	0.969395415	0.774985382	0.828785351	0.885541263	SORBI_3004G235600
LOC8066423	Zm00001d018070	M1		0.891213212	0.898820087	0.933097163	0.931799512	0.913732494	SORBI_3004G235000
LOC110434943	Zm00001d018077	M1		0.986722615	0.982472619	0.882608138	0.851245943	0.925762329	SORBI_3004G234200
LOC8075695	Zm00001d018080	M1		0.807114122	0.827624969	0.911708381	0.869904835	0.854088077	SORBI_3004G233700
LOC8066221	Zm00001d018090	M1		0.829600258	0.828829904	0.638269228	0.668808332	0.741376931	SORBI_3004G232300
LOC8075687	Zm00001d018102	M1		0.957996651	0.930541066	0.882180294	0.857921533	0.907159886	SORBI_3004G231200
LOC8075183	Zm00001d018123	M1		0.557600139	0.553096068	0.972846875	0.925510204	0.752263321	SORBI_3004G305100
LOC8078901	Zm00001d018125	M1		0.779743229	0.778884761	0.83073143	0.817485377	0.801711199	SORBI_3004G305200
LOC8078903	Zm00001d018131	M1		0.879006025	0.883733374	0.778314722	0.854011038	0.84876629	SORBI_3004G305900
LOC8075186	Zm00001d018134	M1		0.997597829	0.993925279	0.973071493	0.974528302	0.984780726	SORBI_3004G306200
LOC8075187	Zm00001d018135	M1		0.810436356	0.758539449	0.846361186	0.844865871	0.815050715	SORBI_3004G306400
LOC8075188	Zm00001d018144	M1		0.969591746	0.96787096	0.880622941	0.903966115	0.930512941	SORBI_3004G306800
LOC8078909	Zm00001d018145	M1		0.99086097	0.99034127	0.970812476	0.974847901	0.981715654	SORBI_3004G307100
LOC8078911	Zm00001d018146	M1		0.996127269	0.983211749	0.995131134	0.993753476	0.992055907	SORBI_3004G307400
LOC8078912	Zm00001d018147	M1		0.995353493	0.995207207	0.995584649	0.997509947	0.995913824	SORBI_3004G307500
LOC8075190	Zm00001d018148	M1		0.954893846	0.959509557	0.877080392	0.867919394	0.914850797	SORBI_3004G307600
LOC8078914	Zm00001d018151	M1		0.871587781	0.885977711	0.946874599	0.948022647	0.913115684	SORBI_3004G307900
LOC8075195	Zm00001d018155	M1		0.955598329	0.927492156	0.980802024	0.976188643	0.960020288	SORBI_3004G308400
LOC8075197	Zm00001d018156	M1		0.423856178	0.419509942	0.378830274	0.345869165	0.39201639	SORBI_3004G308600
LOC8075198	Zm00001d018157	M1		0.986917663	0.984971032	0.980527389	0.979181106	0.982899297	SORBI_3004G308700
LOC8075201	Zm00001d018178	M1		0.981190692	0.97721402	0.920226635	0.927095366	0.951431678	SORBI_3004G309600
LOC8078925	Zm00001d018180	M1		0.991734837	0.990733933	0.996784752	0.995272934	0.993631614	SORBI_3004G309900
LOC8078926	Zm00001d018184	M1		0.582949974	0.553712009	0.686323047	0.721711865	0.636174224	SORBI_3004G310100
LOC8078931	Zm00001d018192	M1		0.919869882	0.8860932	0.851945978	0.868992427	0.881725372	SORBI_3004G310700
LOC8075204	Zm00001d018193	M1		0.546105133	0.510249649	0.65208574	0.663232505	0.592918257	SORBI_3004G310800
LOC8078932	Zm00001d018194	M1		0.909995573	0.887586857	0.95386985	0.951650765	0.925775761	SORBI_3004G310900
LOC8078933	Zm00001d018195	M1		0.560829981	0.428213963	0.695971135	0.733945762	0.60474021	SORBI_3004G311000
LOC8078934	Zm00001d018197	M1		0.998055935	0.969422363	0.992950841	0.987613913	0.987010763	SORBI_3004G311100
LOC8075207	Zm00001d018201	M1		0.859881046	0.819332859	0.781069732	0.797421526	0.814426291	SORBI_3004G311600
LOC8078946	Zm00001d018208	M1		0.871068081	0.873866764	0.504543704	0.532275703	0.695438563	SORBI_3004G312700
LOC8075213	Zm00001d018214	M1		0.933640021	0.953542625	0.976294585	0.990570316	0.963511887	SORBI_3004G313200
LOC8078949	Zm00001d018217	M1		0.948056898	0.95916309	0.84492363	0.829435674	0.895394823	SORBI_3004G313300
LOC8075221	Zm00001d018230	M1		0.833206937	0.837079668	0.960897902	0.97899041	0.902543729	SORBI_3004G314500
LOC8081919	Zm00001d018233	M1		0.889326892	0.891209362	0.731947118	0.774021307	0.82162617	SORBI_3004G314700
LOC8081920	Zm00001d018234	M1		0.92671453	0.966766116	0.956043298	0.952868695	0.95059816	SORBI_3004G314800
LOC8081924	Zm00001d018241	M1		0.465031856	0.464450561	0.308993894	0.3078488	0.386581278	SORBI_3004G315300
LOC8081925	Zm00001d018242	M1		0.695621042	0.684187631	0.817280012	0.871689556	0.76719456	SORBI_3004G315400
LOC8078394	Zm00001d018243	M1		0.957392258	0.964494832	0.990527532	0.979885216	0.973074959	SORBI_3004G315500
LOC8081926	Zm00001d018244	M1		0.765549631	0.767355109	0.628885894	0.53345313	0.673810941	SORBI_3004G315600
LOC8081931	Zm00001d018255	M1		0.617153966	0.663669086	0.274259473	0.285061518	0.460036011	SORBI_3004G316500
LOC110434400	Zm00001d018258	M1		0.990826324	0.987919851	0.965553661	0.969605956	0.978476448	SORBI_3004G316700
LOC8081934	Zm00001d018259	M1		0.905156584	0.902631224	0.914773457	0.886709736	0.90231775	SORBI_3004G316900
LOC8081937	Zm00001d018261	M1		0.918599503	0.908016861	0.781060768	0.767867686	0.843886205	SORBI_3004G317200
LOC8082673	Zm00001d018274	M1		0.992581757	0.991538506	0.990540367	0.989436529	0.99102429	SORBI_3004G317700
LOC8082675	Zm00001d018275	M1		0.958162185	0.962535369	0.889584136	0.852323193	0.915651221	SORBI_3004G318000
LOC8082687	Zm00001d018284	M1		0.658987931	0.659769407	0.332017713	0.308882043	0.489914274	SORBI_3004G319100
LOC8082688	Zm00001d018286	M1		0.91558909	0.9139068	0.907262226	0.918514953	0.913818267	SORBI_3004G319300
LOC8082689	Zm00001d018287	M1		0.907581853	0.915050141	0.771402901	0.772692851	0.841681936	SORBI_3004G319400
LOC8081945	Zm00001d018289	M1		0.983173253	0.981190692	0.964092471	0.962275153	0.972682892	SORBI_3004G319900
LOC8082691	Zm00001d018290	M1		0.911115816	0.89543626	0.952706114	0.957104351	0.929090635	SORBI_3004G320000
LOC8081946	Zm00001d018291	M1		0.784578369	0.791342175	0.893582339	0.917965173	0.846867014	SORBI_3004G320100
LOC8081947	Zm00001d018292	M1		0.751694801	0.690341912	0.616416378	0.627667822	0.671530228	SORBI_3004G320300
LOC8082692	Zm00001d018295	M1		0.998968298	0.998771967	0.989141317	0.987793608	0.993668798	SORBI_3004G320500
LOC8081950	Zm00001d018298	M1		0.9994803	0.999411006	0.919619504	0.99331463	0.97795636	SORBI_3004G321000
LOC8082694	Zm00001d018303	M1		0.927080246	0.927299675	0.935849057	0.91961054	0.927459879	SORBI_3004G321100
LOC8082705	Zm00001d018322	M1		0.919096106	0.920089311	0.956881872	0.948148148	0.936053859	SORBI_3004G323100
LOC8082706	Zm00001d018323	M1		0.612399669	0.639778261	0.679673127	0.781893638	0.678436174	SORBI_3004G323200
LOC8081957	Zm00001d018325	M1		0.8383231	0.828079225	0.900291545	0.914103167	0.870199259	SORBI_3004G323400
LOC110434902	Zm00001d018328	M1		0.97889246	0.970276981	0.998074702	0.993525863	0.985192502	SORBI_3004G323700
LOC8082710	Zm00001d018330	M1		0.891401844	0.86708756	0.479281222	0.48509819	0.680717204	SORBI_3004G323800
LOC8081959	Zm00001d018331	M1		0.707266183	0.707558755	0.668617636	0.728558593	0.703000292	SORBI_3004G323900
LOC8082713	Zm00001d018333	M1		0.916416761	0.89123246	0.847045737	0.842268552	0.874240877	SORBI_3004G324100
LOC8082721	Zm00001d018335	M1		0.986730314	0.947444806	0.934396832	0.940456937	0.952257222	SORBI_3004G325000
LOC8081964	Zm00001d018337	M1		0.996577676	0.995711508	0.99377059	0.992337312	0.994599272	SORBI_3004G325200
LOC8081966	Zm00001d018339	M1		0.983165553	0.979369815	0.978593534	0.975394686	0.979130897	SORBI_3004G325400
LOC8082726	Zm00001d018348	M1		0.970935268	0.974850346	0.982883384	0.983796688	0.978116422	SORBI_3004G326500
LOC8082730	Zm00001d018355	M1		0.930721999	0.914484245	0.934338156	0.947394429	0.931734707	SORBI_3004G327100
LOC8081972	Zm00001d018358	M1		0.931118511	0.936650434	0.856372738	0.88230009	0.901610443	SORBI_3004G327200
LOC8082731	Zm00001d018359	M1		0.921740804	0.935992147	0.992341591	0.989387755	0.959865574	SORBI_3004G327300
LOC8081973	Zm00001d018360	M1		0.976755914	0.96923758	0.920630031	0.926053138	0.948169166	SORBI_3004G327400
LOC8081975	Zm00001d018362	M1		0.960610552	0.960075453	0.988165832	0.988402002	0.97431346	SORBI_3004G327700
LOC8081976	Zm00001d018363	M1		0.968452255	0.975781957	0.917860352	0.906253655	0.942087054	SORBI_3004G327800
LOC8082735	Zm00001d018364	M1		0.880499682	0.872946702	0.956226415	0.947022205	0.914173751	SORBI_3004G328000
LOC8082736	Zm00001d018366	M1		0.990472158	0.970454064	0.996106619	0.995832799	0.98821641	SORBI_3004G328400
LOC8081980	Zm00001d018367	M1		0.696244683	0.768132735	0.539000128	0.489115646	0.623123298	SORBI_3004G328700
LOC8082738	Zm00001d018369	M1		0.78246492	0.672573287	0.763279568	0.747259659	0.741394358	SORBI_3004G329000
LOC8081984	Zm00001d018370	M1		0.900044271	0.884591843	0.79778499	0.796380439	0.844700386	SORBI_3004G329300
LOC8081985	Zm00001d018371	M1		0.96168075	0.967532193	0.975185043	0.973283276	0.969420315	SORBI_3004G329400
LOC8082742	Zm00001d018375	M1		0.988893808	0.988893808	0.946142985	0.946773342	0.967675986	SORBI_3004G330000
LOC8083094	Zm00001d018377	M1		0.837449233	0.82928801	0.968907714	0.968271082	0.90097901	SORBI_3004G330600
LOC8084640	Zm00001d018380	M1		0.825623159	0.816738206	0.915583916	0.946095311	0.876010148	SORBI_3004G330900
LOC110434826	Zm00001d018386	M1		0.980085847	0.959678941	0.978879476	0.913271724	0.957978997	SORBI_3004G331700
LOC8084646	Zm00001d018388	M1		0.679048371	0.659642369	0.993595174	0.989141317	0.830356808	SORBI_3004G331800
LOC8056391	Zm00001d018389	M1		0.984905588	0.985113468	0.974765755	0.98275446	0.981884818	SORBI_3004G331900
LOC8056392	Zm00001d018390	M1		0.580389968	0.540073614	0.90455654	0.904622142	0.732410566	SORBI_3004G332100
LOC8084648	Zm00001d018392	M1		0.930902931	0.932531326	0.926211563	0.933179309	0.930706283	SORBI_3004G332400
LOC8056394	Zm00001d018393	M1		0.970796682	0.979462206	0.948934668	0.941951336	0.960286223	SORBI_3004G332500
LOC110434930	Zm00001d018399	M1		0.923646373	0.912143668	0.644868621	0.651309203	0.782991966	SORBI_3004G333100
LOC110434974	Zm00001d018401	M1		0.985590822	0.983257945	0.993550963	0.99352244	0.988980543	SORBI_3004G333400
LOC8084652	Zm00001d018403	M1		0.995426636	0.990733933	0.979313127	0.978667693	0.986035347	SORBI_3004G333500
LOC8084654	Zm00001d018405	M1		0.858522126	0.855719593	0.935997376	0.93407493	0.896078506	SORBI_3004G333800
LOC8084656	Zm00001d018406	M1		0.849825804	0.835081708	0.771993326	0.719259402	0.79404006	SORBI_3004G334000
LOC110434961	Zm00001d018409	M1		0.99233923	0.994364137	0.999974329	0.998947504	0.9964063	SORBI_3004G335000
LOC8084663	Zm00001d018411	M1		0.961407426	0.98992166	0.963359432	0.952757455	0.966861493	SORBI_3004G335700
LOC8056405	Zm00001d018412	M1		0.995130214	0.996481435	0.998312155	0.998639456	0.997140815	SORBI_3004G335800
LOC8084668	Zm00001d018414	M1		0.766381152	0.787627279	0.703600308	0.750635348	0.752061022	SORBI_3004G336500
LOC8056409	Zm00001d018416	M1		0.769195234	0.74414182	0.588037479	0.645585932	0.686740117	SORBI_3004G336700
LOC8084673	Zm00001d018420	M1		0.990314323	0.989717629	0.798665126	0.778282634	0.889244928	SORBI_3004G337400
LOC8084675	Zm00001d018423	M1		0.994699055	0.990606895	0.975420357	0.977428168	0.984538619	SORBI_3004G337800
LOC8084678	Zm00001d018429	M1		0.66530518	0.6508019	0.595661661	0.557044453	0.617203298	SORBI_3004G338000
LOC8056416	Zm00001d018431	M1		0.951313687	0.920999108	0.605139263	0.523219099	0.750167789	SORBI_3004G338200
LOC8084683	Zm00001d018438	M1		0.680384193	0.682901854	0.895238095	0.906550293	0.791268609	SORBI_3004G339000
LOC110434488	Zm00001d018439	M1		0.957746425	0.943733759	0.977988848	0.973335534	0.963201141	SORBI_3004G339100
LOC8084691	Zm00001d018450	M1		0.974573172	0.989359613	0.999358234	0.999284074	0.990643773	SORBI_3004G340400
LOC110434843	Zm00001d018454	M1		0.936708179	0.923072777	0.888324135	0.907887306	0.913998099	SORBI_3004G341200
LOC8056431	Zm00001d018455	M1		0.456285489	0.435089408	0.659874214	0.700213066	0.562865544	SORBI_3004G341300
LOC8084696	Zm00001d018460	M1		0.96399438	0.96041807	0.933378257	0.933466821	0.947814382	SORBI_3004G341700
LOC8084697	Zm00001d018461	M1		0.913202317	0.868300194	0.982351431	0.984695161	0.937137276	SORBI_3004G341800
LOC8084698	Zm00001d018462	M1		0.863322619	0.854714838	0.780972917	0.882113978	0.845281088	SORBI_3004G341900
LOC8084700	Zm00001d018464	M1		0.937096992	0.935995996	0.931741753	0.939992299	0.93620676	SORBI_3004G342100
LOC8056432	Zm00001d018465	M1		0.649744962	0.649744962	0.783130719	0.758663843	0.710321121	SORBI_3004G342200
LOC8084704	Zm00001d018466	M1		0.944241911	0.94320636	0.346264921	0.342717788	0.644107745	SORBI_3004G343000
LOC8056436	Zm00001d018467	M1		0.994094662	0.995191808	0.987100501	0.985889702	0.990569168	SORBI_3004G343100
LOC8056439	Zm00001d018469	M1		0.908667449	0.88220507	0.899418743	0.923307113	0.903399594	SORBI_3004G343400
LOC8084705	Zm00001d018470	M1		0.762562316	0.80997825	0.972016144	0.974765755	0.879830616	SORBI_3004G343500
LOC8056440	Zm00001d018471	M1		0.942802148	0.940715647	0.978287768	0.982692851	0.961124603	SORBI_3004G343600
LOC8084707	Zm00001d018473	M1		0.791057302	0.81176063	0.53726736	0.506982416	0.661766927	SORBI_3004G343800
LOC8084710	Zm00001d018475	M1		0.590603045	0.613450619	0.700911308	0.705561362	0.652631583	SORBI_3004G344200
LOC8084711	Zm00001d018478	M1		0.969568649	0.972109407	0.979529086	0.985795576	0.976750679	SORBI_3004G344500
LOC8055309	Zm00001d018479	M1		0.997855754	0.998059785	0.99926582	0.998571001	0.99843809	SORBI_3004G344800
LOC8056444	Zm00001d018481	M1		0.994317941	0.995830847	0.958410702	0.970786805	0.979836574	SORBI_3004G344901
LOC8056445	Zm00001d018482	M1		0.860508537	0.877751044	0.785407664	0.775202156	0.82471735	SORBI_3004G345100
LOC110434686	Zm00001d018487	M1		0.932458183	0.96493369	0.979112651	0.982620973	0.964781374	SORBI_3004G345800
LOC8055312	Zm00001d018488	M1		0.937120089	0.974950436	0.922025414	0.921909896	0.939001459	SORBI_3004G346000
LOC8055314	Zm00001d018490	M1		0.759047601	0.759047601	0.308509819	0.230859783	0.514366201	SORBI_3004G346200
LOC8056450	Zm00001d018491	M1		0.970773584	0.957969703	0.952681666	0.934800227	0.954056295	SORBI_3004G346400
LOC8055316	Zm00001d018494	M1		0.865747888	0.863384213	0.912144049	0.880737848	0.880503499	SORBI_3004G347100
LOC8055317	Zm00001d018495	M1		0.906838874	0.917394568	0.769532611	0.757061567	0.837706905	SORBI_3004G347300
LOC8056458	Zm00001d018498	M1		0.952645661	0.914461148	0.940527532	0.935463997	0.935774584	SORBI_3004G347800
LOC8057550	Zm00001d018501	M1		0.892198718	0.900225204	0.760980619	0.769001269	0.830601452	SORBI_3004G348100
LOC8055324	Zm00001d018504	M1		0.923765711	0.936088388	0.924260594	0.950943396	0.933764522	SORBI_3004G348900
LOC110434327	Zm00001d018507	M1		0.836240448	0.867360884	0.928316556	0.91896804	0.887721482	SORBI_3004G349100
LOC8055328	Zm00001d018511	M1		0.784589918	0.775019729	0.707169241	0.720631498	0.746852596	SORBI_3004G349400
LOC8084443	Zm00001d018516	M1		0.962508421	0.966315708	0.975263766	0.980641481	0.971182344	SORBI_3004G352600
LOC8055342	Zm00001d018517	M1		0.786152869	0.788959252	0.881632653	0.886390279	0.835783763	SORBI_3004G352700
LOC8084445	Zm00001d018521	M1		0.9648336	0.960083152	0.918855089	0.926134143	0.942476496	SORBI_3004G352900
LOC8055343	Zm00001d018522	M1		0.97921583	0.968937309	0.987431652	0.976501091	0.97802147	SORBI_3004G353000
LOC8055345	Zm00001d018523	M1		0.971108502	0.96630416	0.958721602	0.982444946	0.969644802	SORBI_3004G353200
LOC8084446	Zm00001d018525	M1		0.887944873	0.899667862	0.965082788	0.914670774	0.916841574	SORBI_3004G353400
LOC8055347	Zm00001d018526	M1		0.798198372	0.795091718	0.879958927	0.904727677	0.844494173	SORBI_3004G353500
LOC8084447	Zm00001d018527	M1		0.993424826	0.985048024	0.978633466	0.96531254	0.980604714	SORBI_3004G353600
LOC8084453	Zm00001d018530	M1		0.609953013	0.593570685	0.833767901	0.83425931	0.717887727	SORBI_3004G354700
LOC8056246	Zm00001d018531	M1		0.999611187	0.999761323	0.99948292	0.999597827	0.999613314	SORBI_3004G355500
LOC8056252	Zm00001d018532	M1		0.972736897	0.980798029	0.846549437	0.829101955	0.90729658	SORBI_3004G356000
LOC8056253	Zm00001d018533	M1		0.940226743	0.937193232	0.902226929	0.911128225	0.922693782	SORBI_3004G356200
LOC8056254	Zm00001d018534	M1		0.958085192	0.95905145	0.972044667	0.977583109	0.966691105	SORBI_3004G356300
LOC8084456	Zm00001d018535	M1		0.919615807	0.876407522	0.956099529	0.888637072	0.910189982	SORBI_3004G356700
LOC8056260	Zm00001d018541	M1		0.775816603	0.78141782	0.945883427	0.973732512	0.869212591	SORBI_3004G357000
LOC8056094	Zm00001d018544	M1		0.972883183	0.972394279	0.986642707	0.986420228	0.9795851	SORBI_3004G357300
LOC110434367	Zm00001d018545	M1		0.968332916	0.992485516	0.972166602	0.978729303	0.977928584	SORBI_3004G357400
LOC8056262	Zm00001d018552	M1		0.881292707	0.943071622	0.887300732	0.913552267	0.906304332	SORBI_3004G357500
LOC8056265	Zm00001d018555	M1		0.722664716	0.713244663	0.894622	0.913009516	0.810885224	SORBI_3004G357900
LOC8056266	Zm00001d018557	M1		0.950116451	0.953300098	0.947375176	0.950958065	0.950437448	SORBI_3004G358301
LOC8056267	Zm00001d018565	M1		0.949257983	0.952892037	0.993647941	0.993489924	0.972321971	SORBI_3004G358400
LOC8057261	Zm00001d018571	M1		0.773295094	0.774731007	0.874282292	0.865654102	0.821990624	SORBI_3004G359200
LOC8066462	Zm00001d018574	M1		0.885269378	0.890527977	0.632659479	0.630387627	0.759711115	SORBI_3004G359500
LOC110434872	Zm00001d018575	M1		0.991446115	0.991226686	0.980273942	0.983334046	0.986570197	SORBI_3004G359600
LOC8054484	Zm00001d018595	M1		0.982595808	0.987261563	0.888689228	0.892243187	0.937697446	SORBI_3002G000600
LOC8081572	Zm00001d018596	M1		0.976172908	0.991579996	0.865804866	0.89410003	0.93191445	SORBI_3002G000700
LOC8081574	Zm00001d018598	M1		0.962446827	0.963617115	0.714949484	0.746046008	0.846764858	SORBI_3002G001000
LOC8054485	Zm00001d018599	M1		0.76472196	0.760691394	0.850679559	0.841928721	0.804505409	SORBI_3002G001100
LOC8054487	Zm00001d018603	M1		0.568740977	0.576020634	0.767141574	0.768440508	0.670085923	SORBI_3002G001500
LOC8054490	Zm00001d018609	M1		0.741662657	0.75202202	0.427174212	0.403036471	0.58097384	SORBI_3002G002000
LOC8054491	Zm00001d018610	M1		0.973202702	0.978923258	0.875845756	0.857353927	0.921331411	SORBI_3002G002100
LOC8054496	Zm00001d018614	M1		0.836232749	0.799857564	0.84810679	0.859908869	0.836026493	SORBI_3002G002700
LOC8081581	Zm00001d018616	M1		0.893480646	0.902558081	0.966775767	0.966133084	0.932236895	SORBI_3002G003000
LOC8054499	Zm00001d018623	M1		0.928077301	0.926475853	0.972031832	0.970247722	0.949208177	SORBI_3002G004000
LOC8081589	Zm00001d018624	M1		0.971470367	0.985848748	0.994104308	0.994450006	0.986468358	SORBI_3002G004100
LOC8054502	Zm00001d018625	M1		0.789571343	0.789571343	0.82225645	0.778869391	0.795067132	SORBI_3002G004600
LOC110432537	Zm00001d018626	M1		0.923011183	0.903755317	0.763013734	0.781744504	0.842881185	SORBI_3002G004800
LOC8155361	Zm00001d018627	M1		0.892448944	0.926314169	0.883198562	0.902361699	0.901080844	SORBI_3002G004900
LOC8054506	Zm00001d018630	M1		0.884756949	0.816507228	0.948432807	0.953598474	0.900823865	SORBI_3002G005200
LOC8081596	Zm00001d018634	M1		0.987727369	0.977071584	0.980216489	0.990546785	0.983890557	SORBI_3002G005700
LOC8081598	Zm00001d018635	M1		0.852474352	0.878120609	0.765938721	0.789211911	0.821436398	SORBI_3002G006100
LOC8081599	Zm00001d018636	M1		0.896213886	0.891174716	0.913909211	0.923950712	0.906312131	SORBI_3002G006300
LOC8081601	Zm00001d018637	M1		0.961981021	0.961981021	0.929508407	0.919201643	0.943168023	SORBI_3002G006401
LOC8054513	Zm00001d018641	M1		0.887463669	0.856116105	0.944855786	0.961924015	0.912589894	SORBI_3002G007200
LOC8054516	Zm00001d018647	M1		0.598463996	0.595673012	0.843471405	0.8189244	0.714133203	SORBI_3002G007800
LOC8054520	Zm00001d018653	M1		0.870559929	0.881011684	0.97047234	0.943473238	0.916379298	SORBI_3002G008500
LOC8054521	Zm00001d018656	M1		0.442007199	0.415572195	0.389817311	0.315924968	0.390830418	SORBI_3002G008600
LOC8081609	Zm00001d018659	M1		0.92440475	0.920381884	0.934548411	0.935810551	0.928786399	SORBI_3002G009200
LOC8054530	Zm00001d018665	M1		0.52640656	0.518441668	0.655003637	0.709831857	0.602420931	SORBI_3002G009900
LOC8054535	Zm00001d018677	M1		0.819921852	0.839939946	0.361042228	0.40748116	0.607096296	SORBI_3002G011400
LOC110432335	Zm00001d018691	M1		0.625807942	0.632152138	0.371060626	0.399480169	0.507125219	SORBI_3002G013300
LOC8084261	Zm00001d018693	M1		0.989240275	0.989240275	0.99625722	0.99625722	0.992748747	SORBI_3002G013700
LOC8084276	Zm00001d018696	M1		0.802525359	0.812734587	0.897143428	0.907316134	0.854929877	SORBI_3002G016400
LOC8084286	Zm00001d018712	M1		0.619167324	0.652970955	0.759003979	0.704231378	0.683843409	SORBI_3002G017800
LOC8059890	Zm00001d018718	M1		0.777464247	0.747679634	0.665798999	0.6894622	0.72010127	SORBI_3002G020400
LOC8059891	Zm00001d018719	M1		0.850776664	0.843038901	0.724089049	0.721666025	0.784892659	SORBI_3002G020500
LOC8059893	Zm00001d018724	M1		0.986372298	0.973368237	0.989735409	0.988485289	0.984490308	SORBI_3002G020700
LOC8059895	Zm00001d018725	M1		0.581490963	0.559805978	0.562067343	0.597105635	0.57511748	SORBI_3002G020900
LOC8084300	Zm00001d018727	M1		0.867330087	0.867006718	0.822265007	0.776338999	0.833235203	SORBI_3002G021132
LOC8084310	Zm00001d018732	M1		0.846495871	0.844628799	0.955512771	0.92930019	0.893984408	SORBI_3002G023100
LOC8085837	Zm00001d018738	M1		0.897973168	0.995977133	0.915928636	0.907925099	0.929451009	SORBI_3002G023300
LOC8086382	Zm00001d018751	M1		0.169790216	0.21847439	0.8866641	0.921998317	0.549231756	SORBI_3002G027500
LOC8059932	Zm00001d018752	M1		0.897942371	0.914973149	0.991677577	0.945924785	0.93762947	SORBI_3002G027600
LOC8060696	Zm00001d018754	M1		0.754878448	0.77963159	0.701943838	0.708047747	0.736125406	SORBI_3002G027700
LOC110432552	Zm00001d018755	M1		0.946293766	0.941909033	0.975016757	0.973276858	0.959124103	SORBI_3002G027800
LOC8086386	Zm00001d018756	M1		0.987865956	0.987865956	0.990459077	0.990825311	0.989254075	SORBI_3002G028400
LOC110432855	Zm00001d018758	M1		0.883102035	0.863765326	0.974010305	0.961057631	0.920483824	SORBI_3002G028700
LOC8079907	Zm00001d018770	M1		0.997528535	0.997905799	0.982255879	0.985210041	0.990725064	SORBI_3002G029100
LOC8086395	Zm00001d018776	M1		0.936203877	0.93848286	0.930933128	0.956248663	0.940467132	SORBI_3002G029900
LOC110432507	Zm00001d018781	M1		0.949581352	0.923577079	0.943738502	0.935695033	0.938147992	SORBI_3002G030500
LOC8086400	Zm00001d018786	M1		0.5616846	0.544857852	0.987014321	0.985476832	0.769758401	SORBI_3002G031100
LOC8079918	Zm00001d018787	M1		0.718152946	0.750640002	0.88527055	0.886943624	0.810251781	SORBI_3002G031700
LOC8079919	Zm00001d018788	M1		0.784158759	0.794210151	0.767500963	0.807701194	0.788392767	SORBI_3002G031800
LOC8086402	Zm00001d018789	M1		0.737339518	0.721602217	0.829857813	0.83987293	0.78216812	SORBI_3002G032800
LOC8079923	Zm00001d018790	M1		0.718880527	0.746782669	0.671441407	0.695166788	0.708067848	SORBI_3002G032900
LOC8086405	Zm00001d018792	M1		0.617904645	0.687074856	0.876359169	0.883172892	0.76612789	SORBI_3002G033300
LOC8079925	Zm00001d018794	M1		0.863669086	0.852247223	0.723472953	0.724535636	0.790981225	SORBI_3002G033400
LOC8086407	Zm00001d018795	M1		0.910330491	0.885819876	0.985946748	0.95008343	0.933045136	SORBI_3002G033700
LOC8086408	Zm00001d018796	M1		0.995318846	0.995669163	0.996611475	0.995889029	0.995872128	SORBI_3002G033800
LOC8079929	Zm00001d018797	M1		0.999287818	0.999399457	0.999114363	0.999064855	0.999216623	SORBI_3002G033900
LOC8086411	Zm00001d018798	M1		0.996543029	0.9942217	0.900658269	0.92161285	0.953258962	SORBI_3002G034600
LOC110432959	Zm00001d018801	M1		0.605862992	0.618740015	0.902477217	0.889410859	0.754122771	SORBI_3002G034800
LOC8086413	Zm00001d018803	M1		0.862337112	0.863484303	0.646546585	0.623547317	0.748978829	SORBI_3002G035200
LOC8086416	Zm00001d018807	M1		0.781818182	0.79159625	0.7263445	0.75501362	0.763693138	SORBI_3002G035600
LOC8079942	Zm00001d018812	M1		0.967582238	0.967220372	0.810409447	0.862744762	0.901989205	SORBI_3002G036300
LOC8079943	Zm00001d018813	M1		0.518591804	0.535664928	0.804163779	0.790874085	0.662323649	SORBI_3002G036400
LOC8081137	Zm00001d018822	M1		0.740950474	0.652713029	0.827182361	0.852031546	0.768219353	SORBI_3002G038600
LOC8086425	Zm00001d018825	M1		0.675533655	0.693977249	0.692454664	0.708568495	0.692633516	SORBI_3002G038866
LOC8086427	Zm00001d018828	M1		0.918976767	0.930101352	0.851210086	0.844637585	0.886231448	SORBI_3002G039200
LOC8086428	Zm00001d018829	M1		0.771932323	0.805751352	0.69188665	0.80754717	0.769279374	SORBI_3002G039400
LOC8086433	Zm00001d018838	M1		0.929139799	0.93049872	0.977582192	0.977302015	0.953630682	SORBI_3002G040300
LOC8081147	Zm00001d018842	M1		0.972590611	0.963682559	0.886935475	0.876960596	0.92504231	SORBI_3002G040700
LOC8086440	Zm00001d018862	M1		0.849036629	0.862956903	0.898873059	0.898873059	0.877434912	SORBI_3002G042900
LOC8081159	Zm00001d018863	M1		0.963051219	0.961984871	0.981508578	0.982267288	0.972202989	SORBI_3002G043000
LOC110432512	Zm00001d018864	M1		0.975350798	0.979442958	0.9715883	0.97801737	0.976099857	SORBI_3002G043100
LOC8081161	Zm00001d018869	M1		0.92986353	0.917078898	0.743045394	0.780541651	0.842632368	SORBI_3002G043500
LOC8081162	Zm00001d018870	M1		0.992531711	0.956945701	0.999537928	0.999372903	0.987097061	SORBI_3002G043600
LOC8086441	Zm00001d018871	M1		0.854549304	0.86740323	0.882784165	0.775576214	0.845078228	SORBI_3002G043700
LOC8081163	Zm00001d018872	M1		0.684449406	0.671791812	0.92963676	0.910082146	0.798990031	SORBI_3002G043800
LOC8060699	Zm00001d018883	M1		0.968775624	0.924116028	0.993488213	0.995899114	0.970569745	SORBI_3002G045200
LOC110432248	Zm00001d018887	M1		0.946801917	0.942528824	0.817875326	0.813297394	0.880125865	SORBI_3002G045400
LOC8081171	Zm00001d018890	M1		0.941373934	0.943837699	0.966243101	0.975484533	0.956734817	SORBI_3002G045600
LOC8060701	Zm00001d018891	M1		0.998814313	0.991834928	0.996620032	0.996813988	0.996020815	SORBI_3002G045700
LOC8060702	Zm00001d018894	M1		0.926291071	0.932292649	0.951810494	0.949101527	0.939873935	SORBI_3002G046300
LOC8081174	Zm00001d018895	M1		0.952903586	0.912247608	0.926995536	0.918842254	0.927747246	SORBI_3002G046900
LOC8060709	Zm00001d018901	M1		0.981902874	0.985583123	0.964420485	0.957444487	0.972337742	SORBI_3002G047400
LOC8060710	Zm00001d018902	M1		0.849529382	0.849402344	0.814280213	0.805705301	0.82972931	SORBI_3002G047500
LOC8081176	Zm00001d018903	M1		0.999060689	0.99926472	0.998725025	0.999255551	0.999076496	SORBI_3002G047600
LOC8081181	Zm00001d018912	M1		0.98613747	0.987423248	0.978911565	0.979643178	0.983028865	SORBI_3002G049200
LOC8081182	Zm00001d018917	M1		0.615887437	0.5606298	0.711356408	0.693563086	0.645359183	SORBI_3002G049600
LOC8060724	Zm00001d018927	M1		0.81774681	0.815344638	0.901685095	0.918758111	0.863383663	SORBI_3002G050200
LOC8060726	Zm00001d018929	M1		0.867680403	0.860858853	0.782485285	0.759175117	0.817549915	SORBI_3002G050500
LOC8081186	Zm00001d018930	M1		0.764387042	0.787438646	0.954415351	0.963639364	0.867470101	SORBI_3002G050700
LOC8081187	Zm00001d018935	M1		0.515612188	0.509914731	0.353818509	0.265023745	0.411092293	SORBI_3002G051000
LOC8060730	Zm00001d018937	M1		0.995033973	0.995184109	0.978333975	0.978333975	0.986721508	SORBI_3002G051600
LOC8060731	Zm00001d018938	M1		0.880172464	0.873816719	0.869031218	0.836779618	0.864950005	SORBI_3002G051700
LOC8081191	Zm00001d018939	M1		0.990106442	0.980840375	0.968594532	0.972455397	0.977999187	SORBI_3002G051800
LOC8060732	Zm00001d018941	M1		0.623024657	0.641980251	0.667404698	0.676276045	0.652171413	SORBI_3002G051900
LOC8060734	Zm00001d018943	M1		0.926063942	0.926063942	0.930458221	0.934244641	0.929207687	SORBI_3002G052400
LOC8081195	Zm00001d018946	M1		0.813346679	0.817365696	0.798936502	0.820395328	0.812511051	SORBI_3002G052900
LOC8056616	Zm00001d018954	M1		0.964671915	0.965857602	0.899024515	0.917269214	0.936705812	SORBI_3002G053900
LOC8060743	Zm00001d018961	M1		0.855153697	0.878890536	0.805596201	0.764454713	0.826023786	SORBI_3002G054400
LOC8056621	Zm00001d018963	M1		0.820838065	0.820838065	0.89305609	0.874872716	0.852401234	SORBI_3002G055300
LOC8060749	Zm00001d018964	M1		0.469008527	0.488156603	0.552149917	0.563432165	0.518186803	SORBI_3002G055200
LOC8056623	Zm00001d018965	M1		0.661041925	0.773918734	0.766499807	0.788368345	0.747457203	SORBI_3002G055700
LOC8060751	Zm00001d018966	M1		0.886318189	0.88984702	0.867657554	0.96819407	0.903004208	SORBI_3002G055600
LOC8056619	Zm00001d018967	M1		0.747976055	0.715781572	0.949550764	0.93830317	0.83790289	SORBI_3002G054600
LOC8056620	Zm00001d018969	M1		0.764991435	0.743853098	0.889590553	0.890655885	0.822272743	SORBI_3002G054700
LOC8060752	Zm00001d018972	M1		0.744981041	0.740704098	0.703478372	0.714194033	0.725839386	SORBI_3002G055800
LOC8056625	Zm00001d018973	M1		0.952476277	0.952118261	0.929662431	0.939134899	0.943347967	SORBI_3002G055900
LOC8060753	Zm00001d018977	M1		0.961526765	0.966334957	0.933805673	0.933983656	0.948912763	SORBI_3002G056000
LOC8056631	Zm00001d018981	M1		0.976521086	0.979358266	0.951516707	0.957897289	0.966323337	SORBI_3002G056300
LOC8060760	Zm00001d018983	M1		0.888376032	0.888837988	0.926310986	0.926425077	0.907487521	SORBI_3002G056500
LOC8056634	Zm00001d018984	M1		0.990295074	0.989890863	0.997040541	0.997240406	0.993616721	SORBI_3002G056800
LOC8060766	Zm00001d018987	M1		0.402132697	0.394063865	0.355144825	0.331107322	0.370612177	SORBI_3002G057400
LOC8060767	Zm00001d018988	M1		0.86698362	0.858141012	0.913451418	0.880888204	0.879866064	SORBI_3002G057500
LOC8060769	Zm00001d019002	M1		0.705837969	0.691917695	0.668303883	0.72258375	0.697160824	SORBI_3002G057600
LOC8075023	Zm00001d019039	M1		0.963863492	0.962123458	0.902015146	0.926693193	0.938673822	SORBI_3002G058300
LOC110432907	Zm00001d019040	M1		0.757330664	0.739452967	0.91081651	0.924990374	0.833147629	SORBI_3002G058500
LOC8062273	Zm00001d019043	M1		0.754651319	0.770196139	0.6793531	0.659998716	0.716049819	SORBI_3002G058600
LOC8075027	Zm00001d019045	M1		0.998991396	0.999299367	0.998404753	0.998151714	0.998711807	SORBI_3002G059200
LOC8063627	Zm00001d019047	M1		0.671410698	0.669647566	0.856154537	0.869061371	0.766568543	SORBI_3002G059300
LOC8075043	Zm00001d019048	M1		0.84629569	0.844655747	0.821337441	0.820367824	0.833164175	SORBI_3002G060900
LOC8075048	Zm00001d019052	M1		0.99170404	0.99170404	0.89456039	0.873264023	0.937808123	SORBI_3002G061900
LOC8075050	Zm00001d019054	M1		0.711335245	0.722145016	0.845841355	0.840272109	0.779898431	SORBI_3002G062500
LOC8063649	Zm00001d019059	M1		0.990930264	0.990156488	0.988308447	0.984971263	0.988591615	SORBI_3002G064400
LOC8075064	Zm00001d019061	M1		0.504063288	0.514245568	0.474712988	0.47507637	0.492024554	SORBI_3002G064900
LOC8063660	Zm00001d019069	M1		0.725890709	0.726421958	0.94918239	0.95303372	0.838632194	SORBI_3002G066400
LOC8063662	Zm00001d019075	M1		0.987977595	0.97522376	0.986642707	0.986343217	0.98404682	SORBI_3002G066800
LOC8078402	Zm00001d019100	M1		0.88314438	0.880568976	0.751679288	0.777210884	0.823150882	SORBI_3002G070200
LOC8063685	Zm00001d019108	M1		0.998979847	0.99390603	0.997812291	0.996560133	0.996814575	SORBI_3002G071400
LOC8063686	Zm00001d019115	M1		0.990799376	0.979496853	0.997039319	0.997400847	0.991184099	SORBI_3002G071500
LOC8063690	Zm00001d019123	M1		0.806867746	0.813981868	0.915708601	0.902355282	0.859728374	SORBI_3002G072300
LOC8063695	Zm00001d019130	M1		0.991877274	0.991515408	0.965652676	0.967452474	0.979124458	SORBI_3002G073200
LOC8078421	Zm00001d019139	M1		0.975462437	0.974242103	0.75466564	0.728975741	0.85833648	SORBI_3002G073700
LOC8063697	Zm00001d019142	M1		0.804969877	0.791653995	0.953561802	0.95447311	0.876164696	SORBI_3002G073900
LOC8078426	Zm00001d019147	M1		0.998348507	0.998567936	0.987046592	0.986120738	0.992520943	SORBI_3002G074200
LOC8078427	Zm00001d019148	M1		0.968520693	0.970330876	0.590505528	0.622573054	0.787982538	SORBI_3002G074500
LOC8078429	Zm00001d019150	M1		0.999326314	0.999345562	0.997370592	0.997554871	0.998399335	SORBI_3002G075600
LOC8078430	Zm00001d019163	M1		0.835258792	0.790780128	0.642651778	0.551835451	0.705131537	SORBI_3002G075800
LOC8078431	Zm00001d019165	M1		0.777672127	0.774657864	0.885783963	0.897548453	0.833915602	SORBI_3002G076000
LOC110432940	Zm00001d019172	M1		0.777803014	0.791449964	0.97359224	0.969563171	0.878102097	SORBI_3002G076800
LOC8069100	Zm00001d019173	M1		0.931488076	0.931149308	0.924126128	0.936670517	0.930858507	SORBI_3002G076866
LOC8078434	Zm00001d019177	M1		0.953765904	0.952768849	0.985935338	0.985796799	0.969566722	SORBI_3002G077000
LOC8069101	Zm00001d019180	M1		0.678721152	0.746336111	0.969303042	0.967315564	0.840418967	SORBI_3002G077100
LOC8078435	Zm00001d019181	M1		0.841414355	0.839193117	0.807466491	0.831472212	0.829886544	SORBI_3002G077200
LOC8069103	Zm00001d019184	M1		0.955971744	0.955971744	0.990014119	0.98243101	0.971097154	SORBI_3002G078000
LOC8069104	Zm00001d019185	M1		0.790629992	0.790629992	0.95262625	0.954111154	0.871999347	SORBI_3002G078100
LOC8069105	Zm00001d019186	M1		0.99800204	0.997135873	0.97367732	0.961739736	0.982638742	SORBI_3002G078300
LOC8069112	Zm00001d019195	M1		0.975412392	0.969537852	0.9808607	0.974733667	0.975136153	SORBI_3002G079100
LOC8078447	Zm00001d019206	M1		0.886601351	0.884988355	0.85751936	0.856547298	0.871414091	SORBI_3002G079900
LOC8078453	Zm00001d019217	M1		0.992042808	0.992239139	0.973713259	0.978421255	0.984104115	SORBI_3002G081400
LOC8078454	Zm00001d019218	M1		0.918996016	0.912624872	0.986214863	0.986157817	0.950998392	SORBI_3002G081500
LOC8078461	Zm00001d019220	M1		0.683691028	0.698238793	0.564702862	0.589471368	0.634026013	SORBI_3002G081900
LOC8078462	Zm00001d019221	M1		0.751898832	0.739441418	0.494732017	0.485714286	0.617946638	SORBI_3002G082000
LOC8078467	Zm00001d019225	M1		0.591430716	0.570192289	0.600282377	0.589793351	0.587924683	SORBI_3002G082900
LOC8069132	Zm00001d019228	M1		0.708282486	0.764602622	0.964343473	0.965902965	0.850782886	SORBI_3002G083200
LOC8078470	Zm00001d019230	M1		0.57963544	0.614670953	0.683258461	0.676538864	0.638525929	SORBI_3002G083600
LOC8081482	Zm00001d019240	M1		0.896321675	0.886766885	0.932934012	0.920107817	0.909032597	SORBI_3002G084400
LOC8069135	Zm00001d019249	M1		0.74445749	0.767289666	0.834783725	0.857639156	0.801042509	SORBI_3002G084800
LOC8081774	Zm00001d019256	M1		0.449810406	0.535395454	0.609546628	0.58273099	0.544370869	SORBI_3002G085400
LOC8081779	Zm00001d019258	M1		0.158770427	0.133794006	0.445757926	0.43320498	0.292881835	SORBI_3002G085800
LOC8069144	Zm00001d019262	M1		0.974704059	0.978511347	0.980053908	0.971621101	0.976222604	SORBI_3002G087000
LOC110432864	Zm00001d019263	M1		0.929455469	0.908378727	0.85474693	0.881164164	0.893436323	SORBI_3002G087900
LOC8069151	Zm00001d019266	M1		0.764875946	0.743672165	0.524778591	0.528638457	0.64049129	SORBI_3002G088600
LOC8081799	Zm00001d019268	M1		0.957438454	0.956021789	0.922917469	0.895297993	0.932918926	SORBI_3002G088700
LOC8069152	Zm00001d019269	M1		0.889457779	0.889457779	0.830034655	0.785230822	0.848545259	SORBI_3002G088800
LOC8054405	Zm00001d019282	M1		0.809246819	0.821126788	0.96964874	0.930619579	0.882660482	SORBI_3002G090400
LOC8054416	Zm00001d019297	M1		0.978753874	0.971116201	0.983771018	0.984706713	0.979586951	SORBI_3002G092050
LOC8054417	Zm00001d019299	M1		0.945504591	0.946259119	0.93953422	0.955803705	0.946775409	SORBI_3002G092300
LOC8054421	Zm00001d019305	M1		0.96819048	0.943375743	0.884651521	0.878854519	0.918768066	SORBI_3002G093000
LOC8054423	Zm00001d019306	M1		0.484226127	0.503897754	0.717318518	0.753479086	0.614730371	SORBI_3002G093300
LOC8054431	Zm00001d019320	M1		0.405724405	0.409570188	0.32991272	0.294185599	0.359848228	SORBI_3002G094800
LOC8081823	Zm00001d019325	M1		0.815059766	0.812615248	0.646752663	0.631117957	0.726386408	SORBI_3002G095100
LOC8054436	Zm00001d019328	M1		0.897303332	0.896177528	0.923614427	0.907055149	0.906037609	SORBI_3002G095700
LOC8054437	Zm00001d019329	M1		0.878524821	0.867060612	0.755310258	0.772268368	0.818291015	SORBI_3002G095800
LOC8084589	Zm00001d019343	M1		0.94078879	0.955452043	0.976169084	0.971305352	0.960928817	SORBI_3002G102200
LOC8084602	Zm00001d019348	M1		0.962631609	0.959948415	0.792492762	0.802182005	0.879313698	SORBI_3002G104100
LOC8057271	Zm00001d019349	M1		0.579581545	0.573903336	0.439334764	0.423065075	0.50397118	SORBI_3002G104300
LOC8057272	Zm00001d019354	M1		0.573560718	0.566997094	0.666828025	0.681173434	0.622139818	SORBI_3002G104400
LOC8084615	Zm00001d019370	M1		0.924466345	0.924466345	0.863605442	0.856235828	0.89219349	SORBI_3002G105700
LOC110432334	Zm00001d019372	M1		0.894404558	0.885935365	0.746245668	0.736916222	0.815875453	SORBI_3002G105800
LOC8084626	Zm00001d019394	M1		0.845237041	0.854267853	0.823420186	0.84851752	0.84286065	SORBI_3002G108600
LOC8057297	Zm00001d019397	M1		0.99296672	0.99296672	0.982528559	0.983870278	0.988083069	SORBI_3002G109000
LOC8057298	Zm00001d019400	M1		0.1196851	0.117590899	0.261663743	0.228789629	0.181932343	SORBI_3002G109100
LOC8057304	Zm00001d019404	M1		0.790040999	0.777726022	0.907883455	0.930137338	0.851446953	SORBI_3002G109600
LOC8057306	Zm00001d019414	M1		0.43632514	0.419294362	0.441751879	0.437530484	0.433725466	SORBI_3002G110200
LOC8084635	Zm00001d019420	M1		0.878035917	0.878035917	0.794506482	0.794506482	0.836271199	SORBI_3002G110400
LOC110432887	Zm00001d019422	M1		0.983369584	0.981767709	0.954763188	0.938452794	0.964588319	SORBI_3002G110600
LOC8057307	Zm00001d019423	M1		0.980309126	0.982114604	0.990080129	0.988499551	0.985250852	SORBI_3002G110500
LOC110432206	Zm00001d019426	M1		0.96514927	0.945762516	0.812886664	0.787556155	0.877838651	SORBI_3002G110700
LOC8057310	Zm00001d019430	M1		0.512055127	0.501260755	0.40664014	0.408907714	0.457215934	SORBI_3002G110800
LOC8057311	Zm00001d019432	M1		0.968151984	0.969784228	0.943366889	0.931353841	0.953164235	SORBI_3002G111000
LOC8084637	Zm00001d019439	M1		0.932642966	0.878455527	0.864043127	0.851752022	0.88172341	SORBI_3002G111200
LOC110432928	Zm00001d019447	M1		0.736126884	0.737173984	0.790370656	0.789866513	0.763384509	SORBI_3002G111600
LOC8057317	Zm00001d019449	M1		0.967844013	0.977071584	0.994583494	0.996395108	0.98397355	SORBI_3002G112100
LOC8057318	Zm00001d019450	M1		0.88062672	0.875764633	0.965273321	0.913662284	0.90883174	SORBI_3002G112300
LOC110432778	Zm00001d019454	M1		0.930864435	0.894808769	0.99241575	0.994275446	0.9530911	SORBI_3002G112400
LOC8057912	Zm00001d019461	M1		0.949873925	0.960283333	0.734356492	0.831258289	0.86894301	SORBI_3002G113400
LOC8057322	Zm00001d019462	M1		0.987146074	0.999103035	0.998185941	0.997892155	0.995581801	SORBI_3002G113600
LOC8057915	Zm00001d019472	M1		0.966839259	0.979007949	0.917175496	0.921929149	0.946237963	SORBI_3002G113900
LOC8057923	Zm00001d019473	M1		0.997597829	0.998098281	0.999009113	0.99827151	0.998244183	SORBI_3002G115000
LOC8057926	Zm00001d019479	M1		0.860962793	0.836344388	0.983031703	0.909395456	0.897433585	SORBI_3002G116000
LOC8057928	Zm00001d019481	M1		0.980093546	0.980035802	0.98122834	0.976614042	0.979492932	SORBI_3002G116200
LOC8059662	Zm00001d019483	M1		0.820522395	0.812984813	0.937611774	0.955952839	0.881767956	SORBI_3002G116500
LOC8057933	Zm00001d019490	M1		0.8729621	0.861078282	0.797330253	0.79552689	0.831724381	SORBI_3002G117000
LOC8059716	Zm00001d019492	M1		0.937897715	0.936461802	0.863868566	0.869175972	0.901851014	SORBI_3002G117200
LOC8059718	Zm00001d019493	M1		0.891193964	0.904378958	0.980351688	0.982158901	0.939520878	SORBI_3002G117400
LOC8057935	Zm00001d019495	M1		0.98257271	0.983338787	0.973636247	0.965485817	0.97625839	SORBI_3002G117600
LOC8059721	Zm00001d019501	M1		0.985983485	0.985182761	0.990772829	0.990444102	0.988095794	SORBI_3002G118200
LOC110432835	Zm00001d019505	M1		0.997151271	0.995720491	0.968388026	0.986510076	0.986942466	SORBI_3002G118600
LOC8059728	Zm00001d019510	M1		0.903354955	0.865751737	0.819499422	0.766782185	0.838847075	SORBI_3002G119100
LOC8059732	Zm00001d019525	M1		0.857463477	0.857463477	0.775985111	0.764209415	0.81378037	SORBI_3002G120200
LOC110432878	Zm00001d019531	M1		0.921910188	0.89994418	0.810001284	0.794154427	0.85650252	SORBI_3002G121000
LOC110432823	Zm00001d019536	M1		0.950670799	0.940168999	0.889272237	0.871374663	0.912871674	SORBI_3002G121600
LOC8057950	Zm00001d019541	M1		0.937150886	0.892094778	0.914886407	0.913552267	0.914421085	SORBI_3002G122000
LOC8059743	Zm00001d019547	M1		0.940553962	0.936230824	0.939487871	0.940073711	0.939086592	SORBI_3002G122600
LOC8057958	Zm00001d019552	M1		0.481119473	0.454368371	0.480679172	0.53877551	0.488735632	SORBI_3002G123100
LOC8057966	Zm00001d019561	M1		0.994487325	0.994918484	0.954147093	0.950680272	0.973558294	SORBI_3002G124600
LOC110432426	Zm00001d019568	M1		0.893561488	0.923954343	0.906918239	0.905601702	0.907508943	SORBI_3002G125800
LOC110433067	Zm00001d019577	M1		0.9417358	0.943595173	0.915019161	0.912745476	0.928273902	SORBI_3002G126200
LOC8061651	Zm00001d019582	M1		0.715635286	0.699724751	0.918866498	0.917896718	0.813030813	SORBI_3002G127200
LOC8059759	Zm00001d019586	M1		0.953096068	0.948984659	0.971133359	0.969631626	0.960711428	SORBI_3002G127400
LOC8059760	Zm00001d019587	M1		0.860658672	0.833545705	0.943778434	0.941855988	0.8949597	SORBI_3002G127550
LOC8059761	Zm00001d019589	M1		0.908170847	0.931187804	0.973577571	0.962518005	0.943863557	SORBI_3002G127800
LOC8059762	Zm00001d019591	M1		0.918872827	0.917706388	0.924759338	0.942087023	0.925856394	SORBI_3002G127900
LOC8061653	Zm00001d019593	M1		0.793932978	0.804554116	0.702766929	0.75673396	0.764496996	SORBI_3002G128000
LOC8061659	Zm00001d019599	M1		0.934925798	0.922118068	0.837466307	0.847740983	0.885562789	SORBI_3002G128900
LOC110432523	Zm00001d019627	M1		0.914276365	0.838592574	0.977749255	0.976539882	0.926789519	SORBI_3002G129400
LOC8061664	Zm00001d019629	M1		0.815737301	0.823605952	0.684597613	0.737447054	0.76534698	SORBI_3002G130000
LOC8061667	Zm00001d019631	M1		0.94477316	0.976201567	0.924868438	0.907770504	0.938403417	SORBI_3002G130800
LOC8059776	Zm00001d019641	M1		0.549723789	0.572163301	0.456284724	0.481444402	0.514904054	SORBI_3002G131100
LOC8061669	Zm00001d019643	M1		0.812264932	0.829326507	0.883977239	0.881111906	0.851670146	SORBI_3002G131300
LOC8061670	Zm00001d019644	M1		0.859603873	0.853325121	0.835348479	0.851957387	0.850058715	SORBI_3002G131500
LOC8059779	Zm00001d019645	M1		0.993036013	0.992928224	0.992491336	0.99086125	0.992329206	SORBI_3002G131600
LOC8061671	Zm00001d019648	M1		0.982557311	0.982722846	0.996952528	0.997253241	0.989871481	SORBI_3002G131700
LOC110433154	Zm00001d019656	M1		0.765164668	0.779292822	0.797298165	0.8604287	0.800546089	SORBI_3002G132300
LOC8063871	Zm00001d019670	M1		0.953338594	0.936769773	0.969123918	0.970592442	0.957456182	SORBI_3002G143200
LOC8062598	Zm00001d019671	M1		0.946274517	0.93658884	0.910831179	0.875185654	0.917220047	SORBI_3002G143000
LOC8063875	Zm00001d019677	M1		0.923654072	0.917098146	0.981741753	0.978667693	0.950290416	SORBI_3002G143900
LOC8063423	Zm00001d019697	M1		0.994625912	0.995919389	0.997509947	0.99685718	0.996228107	SORBI_3002G145300
LOC8063865	Zm00001d019699	M1		0.989763825	0.989247974	0.978446926	0.986805288	0.986066003	SORBI_3002G142600
LOC8063860	Zm00001d019703	M1		0.943756857	0.960606702	0.976049288	0.973944295	0.963589285	SORBI_3002G141900
LOC8063859	Zm00001d019706	M1		0.99611187	0.996396743	0.98294043	0.982043383	0.989373107	SORBI_3002G141700
LOC8062586	Zm00001d019719	M1		0.954347198	0.930009817	0.921114106	0.914497497	0.929992155	SORBI_3002G140800
LOC8063854	Zm00001d019721	M1		0.761603757	0.761603757	0.931549223	0.92867839	0.845858782	SORBI_3002G140700
LOC8062571	Zm00001d019752	M1		0.946940504	0.943691413	0.961622385	0.95615087	0.952101293	SORBI_3002G138500
LOC8062554	Zm00001d019757	M1		0.391426867	0.39569226	0.916864188	0.925863175	0.657461623	SORBI_3002G136200
LOC8062569	Zm00001d019763	M1		0.575420091	0.594044617	0.452374535	0.503041972	0.531220304	SORBI_3002G138200
LOC8062570	Zm00001d019764	M1		0.675056301	0.651604335	0.810011552	0.816557566	0.738307438	SORBI_3002G138300
LOC110432550	Zm00001d019765	M1		0.916805574	0.917887321	0.978816013	0.981768707	0.948819404	SORBI_3002G137400
LOC8061705	Zm00001d019775	M1		0.820880411	0.821973707	0.968007958	0.961083301	0.892986344	SORBI_3002G136400
LOC8062537	Zm00001d019850	M1		0.766038535	0.773010221	0.65109742	0.599683395	0.697457393	SORBI_3002G134100
LOC8062546	Zm00001d019865	M1		0.988755221	0.982819086	0.974355025	0.972946807	0.979719035	SORBI_3002G135100
LOC8062545	Zm00001d019866	M1		0.707893673	0.713675822	0.474667351	0.457318884	0.588388933	SORBI_3002G135000
LOC8062009	Zm00001d019907	M1		0.960441168	0.965661271	0.973321782	0.972904634	0.968082213	SORBI_3002G148400
LOC110432804	Zm00001d019920	M1		0.977011273	0.974017114	0.985327392	0.987902708	0.981064622	SORBI_3002G146300
LOC8062016	Zm00001d019934	M1		0.892945547	0.868323292	0.887690925	0.884856886	0.883454163	SORBI_3002G148900
LOC110433180	Zm00001d019936	M1		0.73659269	0.754293304	0.505018611	0.448402002	0.611076652	SORBI_3002G148700
LOC8061997	Zm00001d019947	M1		0.980513156	0.979824072	0.882223078	0.905264316	0.936956155	SORBI_3002G147100
LOC8064651	Zm00001d019956	M1		0.994063865	0.992816584	0.997732426	0.997829404	0.99561057	SORBI_3002G158800
LOC8064652	Zm00001d019957	M1		0.538786981	0.556246351	0.776562701	0.753513313	0.656277336	SORBI_3002G158900
LOC110432497	Zm00001d019978	M1		0.986133621	0.990148788	0.968412271	0.967612202	0.97807672	SORBI_3002G156000
LOC8062054	Zm00001d019983	M1		0.620992051	0.609731873	0.685093056	0.745441321	0.665314575	SORBI_3002G155400
LOC8062051	Zm00001d019989	M1		0.744326603	0.791634747	0.971417162	0.968712617	0.869022782	SORBI_3002G155000
LOC8063481	Zm00001d019993	M1		0.866837334	0.866837334	0.862100959	0.854381837	0.862539366	SORBI_3002G154800
LOC8062047	Zm00001d019994	M1		0.937277924	0.965418744	0.987458463	0.990404313	0.970139861	SORBI_3002G154600
LOC8064653	Zm00001d020002	M1		0.896822128	0.927315073	0.962284117	0.964471826	0.937723286	SORBI_3002G159100
LOC8064657	Zm00001d020003	M1		0.984178007	0.986014282	0.954172193	0.994198434	0.979640729	SORBI_3002G159500
LOC8071866	Zm00001d020011	M1		0.92104787	0.965168518	0.98412128	0.980765352	0.962775755	SORBI_3002G160700
LOC8064664	Zm00001d020013	M1		0.934783362	0.929055108	0.981478629	0.950857827	0.949043731	SORBI_3002G160800
LOC8071867	Zm00001d020014	M1		0.912193714	0.911385291	0.929681684	0.922699981	0.918990167	SORBI_3002G161000
LOC8064665	Zm00001d020017	M1		0.262460301	0.292156372	0.710224618	0.720791797	0.496408272	SORBI_3002G161200
LOC8064666	Zm00001d020018	M1		0.885943064	0.885943064	0.850673854	0.860670004	0.870807497	SORBI_3002G161400
LOC8064668	Zm00001d020020	M1		0.902307855	0.908725194	0.87005234	0.807718307	0.872200924	SORBI_3002G161800
LOC8071876	Zm00001d020021	M1		0.994814544	0.995526726	0.997671306	0.9894622	0.994368694	SORBI_3002G162300
LOC8071883	Zm00001d020030	M1		0.95842781	0.976621177	0.962341163	0.963303812	0.96517349	SORBI_3002G163700
LOC8071885	Zm00001d020032	M1		0.166138625	0.149485112	0.206135284	0.230496727	0.188063937	SORBI_3002G164400
LOC110432499	Zm00001d020036	M1		0.900640964	0.912028179	0.966046293	0.961051926	0.934941841	SORBI_3002G164300
LOC8065469	Zm00001d020052	M1		0.715250322	0.693850211	0.755158516	0.752905367	0.729291104	SORBI_3002G166400
LOC8071899	Zm00001d020053	M1		0.981768137	0.986718765	0.925272751	0.94423694	0.959499148	SORBI_3002G166500
LOC8065472	Zm00001d020057	M1		0.650072181	0.610952207	0.819836991	0.81605271	0.724228522	SORBI_3002G167000
LOC8065479	Zm00001d020062	M1		0.808488441	0.81459011	0.937219869	0.937219869	0.874379572	SORBI_3002G167400
LOC8065480	Zm00001d020063	M1		0.879113814	0.881762362	0.763727378	0.765967142	0.822642674	SORBI_3002G167500
LOC110432411	Zm00001d020064	M1		0.900009624	0.853309722	0.991535105	0.993370556	0.934556252	SORBI_3002G167600
LOC8067275	Zm00001d020086	M1		0.819721672	0.819721672	0.933516695	0.922557367	0.873879351	SORBI_3002G169900
LOC8054569	Zm00001d020103	M1		0.968479202	0.968479202	0.818465751	0.814757769	0.892545481	SORBI_3002G172500
LOC8075824	Zm00001d020108	M1		0.95013185	0.886262583	0.810897189	0.879630343	0.881730491	SORBI_3002G172700
LOC8054571	Zm00001d020112	M1		0.868565819	0.841656882	0.819788401	0.822275703	0.838071701	SORBI_3002G173000
LOC8055524	Zm00001d020117	M1		0.795515177	0.804226897	0.753411445	0.789566309	0.785679957	SORBI_3002G173100
LOC8055528	Zm00001d020129	M1		0.860931996	0.843088946	0.841614969	0.872074616	0.854427632	SORBI_3002G173400
LOC8054576	Zm00001d020133	M1		0.938325025	0.935510943	0.780575878	0.825579372	0.869997804	SORBI_3002G173800
LOC8054577	Zm00001d020134	M1		0.560968568	0.582923027	0.798511103	0.723253326	0.666414006	SORBI_3002G174000
LOC110432933	Zm00001d020139	M1		0.883906608	0.902450292	0.897114905	0.905513688	0.897246373	SORBI_3002G174900
LOC8055552	Zm00001d020176	M1		0.663368814	0.662032991	0.766012065	0.74733117	0.70968626	SORBI_3002G177100
LOC8054600	Zm00001d020180	M1		0.885084596	0.862648933	0.946418945	0.931382364	0.906383709	SORBI_3002G177500
LOC8055554	Zm00001d020182	M1		0.962550767	0.965645872	0.966628161	0.973122834	0.966986909	SORBI_3002G177700
LOC8055563	Zm00001d020188	M1		0.992839682	0.992839682	0.994493647	0.991920164	0.993023294	SORBI_3002G179000
LOC8054610	Zm00001d020204	M1		0.98299232	0.986272208	0.956730293	0.955897831	0.970473163	SORBI_3002G179400
LOC8055567	Zm00001d020206	M1		0.510511424	0.460246761	0.92462585	0.924919066	0.705075775	SORBI_3002G179700
LOC8054613	Zm00001d020208	M1		0.831470752	0.845722095	0.840371369	0.862636375	0.845050148	SORBI_3002G179900
LOC8055573	Zm00001d020220	M1		0.82257425	0.869258753	0.953890386	0.953890386	0.899903444	SORBI_3002G180400
LOC8055574	Zm00001d020224	M1		0.876164995	0.882563086	0.662242759	0.663387242	0.77108952	SORBI_3002G180600
LOC8054615	Zm00001d020225	M1		0.705799473	0.700232903	0.506071108	0.489339551	0.600360759	SORBI_3002G180800
LOC8055576	Zm00001d020230	M1		0.989321117	0.989321117	0.896630015	0.990253712	0.96638149	SORBI_3002G181000
LOC8055579	Zm00001d020234	M1		0.828075376	0.822239332	0.962524525	0.962518005	0.893839309	SORBI_3002G181400
LOC110432517	Zm00001d020236	M1		0.791888823	0.809647181	0.798697215	0.863393659	0.815906719	SORBI_3002G181600
LOC8054616	Zm00001d020237	M1		0.852124035	0.817993186	0.849969745	0.804672058	0.831189756	SORBI_3002G181700
LOC8055580	Zm00001d020238	M1		0.936954555	0.902388697	0.812264864	0.672950841	0.831139739	SORBI_3002G181800
LOC8054618	Zm00001d020242	M1		0.988789868	0.98771197	0.990446853	0.987053438	0.988500532	SORBI_3002G182000
LOC8055591	Zm00001d020256	M1		0.958601043	0.944938695	0.924718265	0.921439268	0.937424318	SORBI_3002G183300
LOC8065368	Zm00001d020267	M1		0.81658422	0.812776933	0.908381466	0.907325302	0.86126698	SORBI_3002G184400
LOC8056178	Zm00001d020277	M1		0.78204531	0.804507921	0.631064333	0.675314822	0.723233097	SORBI_3002G185300
LOC8056179	Zm00001d020280	M1		0.797174369	0.726275672	0.503285843	0.439962778	0.616674665	SORBI_3002G185500
LOC8065378	Zm00001d020283	M1		0.989240275	0.990318172	0.95150815	0.945904615	0.969242803	SORBI_3002G186000
LOC8056182	Zm00001d020292	M1		0.971520413	0.960464266	0.868591965	0.896398408	0.924243763	SORBI_3002G185900
LOC110432527	Zm00001d020297	M1		0.911362193	0.88987354	0.928976658	0.93647157	0.91667099	SORBI_3002G186300
LOC110432986	Zm00001d020303	M1		0.84892884	0.803395377	0.709793351	0.695742951	0.76446513	SORBI_3002G186400
LOC8056183	Zm00001d020306	M1		0.857197852	0.870148018	0.892539825	0.926100629	0.886496581	SORBI_3002G186600
LOC8056188	Zm00001d020311	M1		0.964902893	0.968771774	0.939152013	0.947185214	0.955002974	SORBI_3002G187500
LOC8065386	Zm00001d020312	M1		0.843816526	0.843816526	0.940629501	0.938923116	0.891796418	SORBI_3002G187600
LOC8056191	Zm00001d020325	M1		0.775316151	0.802059554	0.922255024	0.905666795	0.851324381	SORBI_3002G188600
LOC8056192	Zm00001d020332	M1		0.831882663	0.833391719	0.867125886	0.850680272	0.845770135	SORBI_3002G188700
LOC8056198	Zm00001d020339	M1		0.978007045	0.976879102	0.978622057	0.969241432	0.975687409	SORBI_3002G189100
LOC8056201	Zm00001d020343	M1		0.788924605	0.804323138	0.960361671	0.939350533	0.873239987	SORBI_3002G189400
LOC8055774	Zm00001d020344	M1		0.99664312	0.965488037	0.996656398	0.997527061	0.989078654	SORBI_3002G189600
LOC110432923	Zm00001d020345	M1		0.831328316	0.829950147	0.847652053	0.852977795	0.840477078	SORBI_3002G189700
LOC8056202	Zm00001d020348	M1		0.550255038	0.536981503	0.448799897	0.475805417	0.502960464	SORBI_3002G189900
LOC8056207	Zm00001d020353	M1		0.673551094	0.652724578	0.772545245	0.794631168	0.723363021	SORBI_3002G190700
LOC8056211	Zm00001d020357	M1		0.836590765	0.846422728	0.984960669	0.983528002	0.912875541	SORBI_3002G191100
LOC8056217	Zm00001d020359	M1		0.964263854	0.984659211	0.958916699	0.958208189	0.966511988	SORBI_3002G192200
LOC8056220	Zm00001d020364	M1		0.624268088	0.526880065	0.551119424	0.566437057	0.567176158	SORBI_3002G193000
LOC8055789	Zm00001d020365	M1		0.983997074	0.992465412	0.972528742	0.96681519	0.978951605	SORBI_3002G193100
LOC8055790	Zm00001d020367	M1		0.809912806	0.845075357	0.931627662	0.917374749	0.875997643	SORBI_3002G193300
LOC8056224	Zm00001d020371	M1		0.817708313	0.813566108	0.930458221	0.922603003	0.871083911	SORBI_3002G193600
LOC8055792	Zm00001d020374	M1		0.926287221	0.926287221	0.746385023	0.625182903	0.806035592	SORBI_3002G193800
LOC8055793	Zm00001d020378	M1		0.534502339	0.516990357	0.286467291	0.231427288	0.392346819	SORBI_3002G193900
LOC8056227	Zm00001d020380	M1		0.862926106	0.864654592	0.905917084	0.948376332	0.895468528	SORBI_3002G194000
LOC8056229	Zm00001d020384	M1		0.566808461	0.518052855	0.510999872	0.49925983	0.523780255	SORBI_3002G194400
LOC8056230	Zm00001d020392	M1		0.934956595	0.950682348	0.93372695	0.963433999	0.945699973	SORBI_3002G194500
LOC8055795	Zm00001d020396	M1		0.88429927	0.928562354	0.946264004	0.997685975	0.939202901	SORBI_3002G194700
LOC110432879	Zm00001d020399	M1		0.925232422	0.91537736	0.84700937	0.814611731	0.875557721	SORBI_3002G194800
LOC8056236	Zm00001d020403	M1		0.794983928	0.781402421	0.869151585	0.862080178	0.826904528	SORBI_3002G195800
LOC8055800	Zm00001d020408	M1		0.59149616	0.623355725	0.375876011	0.442080606	0.508202125	SORBI_3002G196100
LOC8056239	Zm00001d020412	M1		0.770230786	0.745677824	0.708914132	0.716041586	0.735216082	SORBI_3002G196500
LOC8056240	Zm00001d020414	M1		0.87789733	0.844178392	0.799473752	0.725714286	0.81181594	SORBI_3002G196600
LOC8056241	Zm00001d020416	M1		0.801959463	0.780990511	0.848204338	0.85343895	0.821148316	SORBI_3002G196800
LOC8055802	Zm00001d020417	M1		0.45406425	0.482432198	0.613939161	0.553642481	0.526019523	SORBI_3002G196900
LOC8060227	Zm00001d020420	M1		0.43810752	0.441283468	0.380841141	0.461308836	0.430385241	SORBI_3002G197200
LOC8055803	Zm00001d020424	M1		0.964787404	0.964652667	0.960355966	0.95864459	0.962110157	SORBI_3002G197300
LOC8055804	Zm00001d020426	M1		0.80881566	0.768190052	0.862039533	0.88907714	0.832030596	SORBI_3002G197500
LOC8055809	Zm00001d020431	M1		0.993417127	0.992993667	0.95886279	0.951219356	0.974123235	SORBI_3002G198300
LOC8055807	Zm00001d020432	M1		0.995934787	0.997339903	0.929966812	0.940803491	0.966011248	SORBI_3002G198200
LOC8060236	Zm00001d020436	M1		0.964741208	0.964741208	0.861689414	0.852629958	0.910950447	SORBI_3002G198900
LOC8063304	Zm00001d020437	M1		0.987661925	0.98876677	0.893537415	0.893434732	0.940850211	SORBI_3002G199000
LOC8060237	Zm00001d020438	M1		0.95201817	0.963925086	0.965402387	0.957749785	0.959773857	SORBI_3002G199100
LOC8060239	Zm00001d020441	M1		0.86089735	0.848245316	0.834520601	0.844028824	0.846923023	SORBI_3002G199400
LOC110432418	Zm00001d020442	M1		0.743283352	0.776186168	0.348402002	0.374784092	0.560663904	SORBI_3002G199650
LOC8060241	Zm00001d020443	M1		0.612596	0.576413297	0.567880318	0.557992556	0.578720543	SORBI_3002G199900
LOC8070619	Zm00001d020444	M1		0.85270533	0.867676554	0.897866769	0.897355924	0.878901144	SORBI_3002G200100
LOC8060242	Zm00001d020445	M1		0.958720382	0.959193887	0.988394016	0.987498396	0.97345167	SORBI_3002G200200
LOC8060243	Zm00001d020448	M1		0.764290801	0.766473543	0.861432707	0.877640868	0.81745948	SORBI_3002G200500
LOC8060244	Zm00001d020450	M1		0.995007026	0.993455623	0.995060234	0.995148248	0.994667783	SORBI_3002G200600
LOC8070624	Zm00001d020461	M1		0.856989972	0.839631975	0.947131305	0.928763958	0.893129303	SORBI_3002G201600
LOC8060249	Zm00001d020463	M1		0.938536754	0.92944777	0.564471826	0.679543063	0.777999853	SORBI_3002G201900
LOC8060251	Zm00001d020486	M1		0.960048505	0.944434393	0.943697857	0.939716767	0.94697438	SORBI_3002G202400
LOC8068361	Zm00001d020487	M1		0.912216811	0.889942833	0.940869094	0.934235473	0.919316053	SORBI_3002G202500
LOC8060255	Zm00001d020497	M1		0.884919061	0.848282101	0.750282377	0.850793651	0.833569298	SORBI_3002G203100
LOC8062109	Zm00001d020501	M1		0.630951052	0.58771582	0.58003109	0.590598126	0.597324022	SORBI_3002G203500
LOC8062110	Zm00001d020502	M1		0.728004158	0.722302851	0.643497075	0.676979849	0.692695983	SORBI_3002G203600
LOC8060257	Zm00001d020506	M1		0.9097107	0.909949377	0.866236683	0.87184358	0.889435085	SORBI_3002G204000
LOC8062113	Zm00001d020511	M1		0.924939849	0.944492137	0.903632396	0.87378477	0.911712288	SORBI_3002G204200
LOC8060259	Zm00001d020515	M1		0.94183974	0.938748484	0.885245796	0.831310853	0.899286218	SORBI_3002G204400
LOC8060263	Zm00001d020524	M1		0.481215714	0.462856813	0.736907258	0.7508236	0.607950846	SORBI_3002G204900
LOC8060267	Zm00001d020530	M1		0.763998229	0.741551017	0.873204124	0.870462255	0.812303906	SORBI_3002G205300
LOC8055989	Zm00001d020532	M1		0.9091833	0.910138009	0.752817353	0.747621615	0.829940069	SORBI_3002G205600
LOC8055991	Zm00001d020535	M1		0.514638231	0.537886166	0.676485689	0.650670187	0.594920068	SORBI_3002G206000
LOC8055992	Zm00001d020536	M1		0.843658692	0.853209632	0.918701065	0.875876011	0.87286135	SORBI_3002G206100
LOC8055993	Zm00001d020537	M1		0.972613709	0.935587935	0.890920293	0.892898399	0.923005084	SORBI_3002G206200
LOC8060271	Zm00001d020538	M1		0.85806017	0.877350682	0.874003337	0.849826723	0.864810228	SORBI_3002G206300
LOC8055995	Zm00001d020540	M1		0.835412777	0.8383154	0.771595431	0.860634065	0.826489418	SORBI_3002G206400
LOC8055996	Zm00001d020541	M1		0.917178989	0.921305796	0.775957607	0.72963676	0.836019788	SORBI_3002G206500
LOC8060272	Zm00001d020543	M1		0.65217408	0.65007988	0.768879843	0.836323964	0.726864442	SORBI_3002G206700
LOC8060274	Zm00001d020549	M1		0.758243027	0.762442977	0.751934283	0.742106276	0.753681641	SORBI_3002G206800
LOC8060275	Zm00001d020550	M1		0.848788542	0.862687429	0.59901168	0.646367604	0.739213814	SORBI_3002G207000
LOC8060277	Zm00001d020551	M1		0.583627509	0.554354898	0.776626877	0.756661533	0.667817704	SORBI_3002G207200
LOC8056001	Zm00001d020552	M1		0.992797336	0.990019826	0.991522269	0.975576948	0.987479095	SORBI_3002G207300
LOC8056002	Zm00001d020555	M1		0.517013454	0.536038342	0.67962749	0.715639841	0.612079782	SORBI_3002G207400
LOC8060280	Zm00001d020557	M1		0.908401825	0.942936885	0.9621512	0.978953738	0.948110912	SORBI_3002G207900
LOC8060282	Zm00001d020560	M1		0.808426847	0.812453564	0.878254396	0.820596415	0.829932805	SORBI_3002G208200
LOC8060284	Zm00001d020561	M1		0.867368583	0.88073066	0.958901296	0.960123219	0.91678094	SORBI_3002G208400
LOC8060290	Zm00001d020571	M1		0.934090428	0.946532443	0.911872674	0.918385683	0.927720307	SORBI_3002G209400
LOC8060293	Zm00001d020578	M1		0.603645603	0.619837161	0.430262024	0.400881359	0.513656537	SORBI_3002G210100
LOC8060298	Zm00001d020589	M1		0.694777972	0.700594768	0.675773328	0.705794435	0.694235126	SORBI_3002G211000
LOC8080980	Zm00001d020602	M1		0.774834947	0.797466941	0.940403763	0.909826356	0.855633002	SORBI_3002G213300
LOC8080981	Zm00001d020603	M1		0.946447751	0.955529036	0.823006033	0.79849185	0.880868667	SORBI_3002G213400
LOC8062736	Zm00001d020609	M1		0.862999249	0.868704406	0.929154152	0.911160313	0.89300453	SORBI_3002G214200
LOC8062741	Zm00001d020615	M1		0.90814005	0.921121013	0.950503328	0.946548582	0.931578243	SORBI_3002G214900
LOC8080994	Zm00001d020620	M1		0.431479735	0.452466653	0.382871262	0.313164763	0.394995603	SORBI_3002G215300
LOC8062743	Zm00001d020622	M1		0.817665967	0.832263777	0.761196252	0.775268167	0.796598541	SORBI_3002G215600
LOC8062745	Zm00001d020627	M1		0.862040691	0.897160895	0.965902965	0.971961237	0.924266447	SORBI_3002G216000
LOC8081002	Zm00001d020631	M1		0.89511289	0.924062133	0.940337752	0.948444787	0.926989391	SORBI_3002G217100
LOC110432365	Zm00001d020638	M1		0.577814563	0.629191769	0.761552707	0.811705814	0.695066214	SORBI_3002G217300
LOC8081005	Zm00001d020640	M1		0.908983119	0.868685158	0.854832499	0.791103288	0.855901016	SORBI_3002G217600
LOC8081006	Zm00001d020643	M1		0.946574789	0.939606952	0.719702221	0.712339879	0.82955596	SORBI_3002G217700
LOC110432278	Zm00001d020644	M1		0.940172849	0.946159028	0.958580413	0.965199161	0.952527863	SORBI_3002G218000
LOC8081014	Zm00001d020656	M1		0.820229823	0.855846631	0.849996149	0.953011717	0.86977108	SORBI_3002G219500
LOC8081015	Zm00001d020658	M1		0.971728293	0.966889304	0.829028366	0.832080973	0.899931734	SORBI_3002G219700
LOC8062760	Zm00001d020659	M1		0.834492715	0.81994495	0.962187139	0.958208189	0.893708248	SORBI_3002G219800
LOC8081016	Zm00001d020664	M1		0.941389333	0.944834754	0.909146451	0.909902452	0.926318247	SORBI_3002G219900
LOC8081018	Zm00001d020669	M1		0.880796104	0.911862645	0.970416415	0.9524763	0.928887866	SORBI_3002G220200
LOC8062762	Zm00001d020673	M1		0.461470945	0.442284372	0.792768212	0.716350368	0.603218474	SORBI_3002G220500
LOC8062763	Zm00001d020674	M1		0.610994553	0.656501068	0.555204723	0.622632953	0.611333324	SORBI_3002G220600
LOC8081030	Zm00001d020684	M1		0.915023194	0.882667026	0.854905844	0.79239008	0.861246536	SORBI_3002G221600
LOC8081031	Zm00001d020685	M1		0.921940985	0.926984005	0.893839045	0.86640996	0.902293499	SORBI_3002G221700
LOC8081032	Zm00001d020686	M1		0.293557639	0.287417473	0.408861507	0.485263216	0.368774959	SORBI_3002G221900
LOC8062769	Zm00001d020691	M1		0.943853098	0.947949108	0.988913948	0.88271082	0.940856744	SORBI_3002G222500
LOC8081038	Zm00001d020692	M1		0.875688924	0.835793891	0.951359831	0.951359831	0.903550619	SORBI_3002G222800
LOC8062772	Zm00001d020694	M1		0.969537852	0.975362347	0.951604415	0.955820819	0.963081358	SORBI_3002G223200
LOC8062774	Zm00001d020696	M1		0.937243278	0.937782226	0.767612202	0.679579001	0.830554177	SORBI_3002G223500
LOC110432237	Zm00001d020702	M1		0.994779469	0.994830798	0.984915929	0.975861036	0.987596808	SORBI_3002G224100
LOC8081050	Zm00001d020706	M1		0.981156045	0.964152215	0.974141103	0.991018941	0.977617076	SORBI_3002G224700
LOC110432840	Zm00001d020707	M1		0.805870691	0.805870691	0.79849185	0.813365849	0.80589977	SORBI_3002G224800
LOC8063706	Zm00001d020722	M1		0.716755529	0.715881662	0.878814587	0.863977667	0.793857361	SORBI_3002G226300
LOC8083225	Zm00001d020725	M1		0.772879333	0.770415568	0.835744948	0.81342208	0.798115482	SORBI_3002G226700
LOC8063707	Zm00001d020726	M1		0.423898524	0.389863915	0.568465445	0.452689	0.458729221	SORBI_3002G226800
LOC8063708	Zm00001d020727	M1		0.96504148	0.949519758	0.946513376	0.92188993	0.945741136	SORBI_3002G226900
LOC8083226	Zm00001d020728	M1		0.638438589	0.637591669	0.736307461	0.743809809	0.689036882	SORBI_3002G227000
LOC110432225	Zm00001d020737	M1		0.649748811	0.592393125	0.652542107	0.687979007	0.645665763	SORBI_3002G228000
LOC110432446	Zm00001d020744	M1		0.527496006	0.490439436	0.593967398	0.663868566	0.568942852	SORBI_3002G228600
LOC8083242	Zm00001d020762	M1		0.900537024	0.874374916	0.935061823	0.980952381	0.922731536	SORBI_3002G229900
LOC8063721	Zm00001d020769	M1		0.559986911	0.55254942	0.586353485	0.604043127	0.575733236	SORBI_3002G230400
LOC8083251	Zm00001d020775	M1		0.960121648	0.956603084	0.977004236	0.978148576	0.967969386	SORBI_3002G231200
LOC8083252	Zm00001d020780	M1		0.667280042	0.667580313	0.654154794	0.697973445	0.671747148	SORBI_3002G231600
LOC110433135	Zm00001d020783	M1		0.985583123	0.987311609	0.972724939	0.960980619	0.976650072	SORBI_3002G232400
LOC8083256	Zm00001d020787	M1		0.850303159	0.795468982	0.849793718	0.826402259	0.830492029	SORBI_3002G232700
LOC8083259	Zm00001d020793	M1		0.720967028	0.720393433	0.870055192	0.821489183	0.783226209	SORBI_3002G233300
LOC8083266	Zm00001d020808	M1		0.641268069	0.572883183	0.625131562	0.570761135	0.602510987	SORBI_3002G234200
LOC8063738	Zm00001d020810	M1		0.99874502	0.998694974	0.996597213	0.996703889	0.997685274	SORBI_3002G234300
LOC8083267	Zm00001d020811	M1		0.585979635	0.71821069	0.835014761	0.794860166	0.733516313	SORBI_3002G234400
LOC8083273	Zm00001d020821	M1		0.967844013	0.975112121	0.961160313	0.947100134	0.962804145	SORBI_3002G235200
LOC8063742	Zm00001d020825	M1		0.919958424	0.888660905	0.974303684	0.975864459	0.939696868	SORBI_3002G235600
LOC8063744	Zm00001d020835	M1		0.793101457	0.793101457	0.576203312	0.563089279	0.681373876	SORBI_3002G236500
LOC8083279	Zm00001d020838	M1		0.884480203	0.883329163	0.646367604	0.634464268	0.762160309	SORBI_3002G236700
LOC8063747	Zm00001d020851	M1		0.95422786	0.961807788	0.979681684	0.982918752	0.969659021	SORBI_3002G237700
LOC8063749	Zm00001d020853	M1		0.990483706	0.98813158	0.9868823	0.986805288	0.988075719	SORBI_3002G238000
LOC8055839	Zm00001d020867	M1		0.445171597	0.435659153	0.380657169	0.510068394	0.442889078	SORBI_3002G240700
LOC8055840	Zm00001d020869	M1		0.707681943	0.69815795	0.719342831	0.620774887	0.686489403	SORBI_3002G240800
LOC8063761	Zm00001d020870	M1		0.886589802	0.886589802	0.94335059	0.931536388	0.912016646	SORBI_3002G240900
LOC8055851	Zm00001d020882	M1		0.771932323	0.700032722	0.924690883	0.872529842	0.817296443	SORBI_3002G242800
LOC8055852	Zm00001d020887	M1		0.809389256	0.806940889	0.746388283	0.829081174	0.7979499	SORBI_3002G243000
LOC8055856	Zm00001d020900	M1		0.929070506	0.932450484	0.987322368	0.996970864	0.961453556	SORBI_3002G243650
LOC8064213	Zm00001d020901	M1		0.803210594	0.838099821	0.960967783	0.957145424	0.889855906	SORBI_3002G243800
LOC110432858	Zm00001d020902	M1		0.976686621	0.950486016	0.946662816	0.910713827	0.94613732	SORBI_3002G244100
LOC110432925	Zm00001d020908	M1		0.993474872	0.98791429	0.938120909	0.944899793	0.966102466	SORBI_3002G244500
LOC8055861	Zm00001d020909	M1		0.669204858	0.68378342	0.905680914	0.908792196	0.791865347	SORBI_3002G244700
LOC8064841	Zm00001d020915	M1		0.902739014	0.863060843	0.617727007	0.627556012	0.752770719	SORBI_3002G245100
LOC8055865	Zm00001d020923	M1		0.560622101	0.556606933	0.604004621	0.569176889	0.572602636	SORBI_3002G245500
LOC8055867	Zm00001d020925	M1		0.773052567	0.806852347	0.618189079	0.411256578	0.652337643	SORBI_3002G245700
LOC8055870	Zm00001d020929	M1		0.948838373	0.967043289	0.843391948	0.868598383	0.906967998	SORBI_3002G246000
LOC8064843	Zm00001d020930	M1		0.996901045	0.997528535	0.993798705	0.99335772	0.995396502	SORBI_3002G246200
LOC8064845	Zm00001d020931	M1		0.909826189	0.936681231	0.771952986	0.854455996	0.868229101	SORBI_3002G246400
LOC8055872	Zm00001d020935	M1		0.143872346	0.137258676	0.725837505	0.742923153	0.43747292	SORBI_3002G246700
LOC8055875	Zm00001d020936	M1		0.404742748	0.412380421	0.506590225	0.583904505	0.476904475	SORBI_3002G247000
LOC8064849	Zm00001d020939	M1		0.938074798	0.938032452	0.957934369	0.932152484	0.941548526	SORBI_3002G247500
[truncated: 16,140 more rows]
