# Supplementary material for: Gene duplication and cellular divergence in crops
Source: Research Square preprint supplement (doi:10.21203/rs.3.rs-1739501/v1), 2022-06-17
Supplement: Supplementary file 2 [file 5367891a68f16a8bfa1f9b6d.csv]

Enrichment FDR	nGenes	Pathway Genes	Fold Enrichment	Pathway	URL	Genes	Conditions
7.31E-08	52	374	2.639776931	Hormone-mediated signaling pathway	http://amigo.geneontology.org/amigo/term/GO:0009755	SORBI_3001G045000 SORBI_3001G056100 SORBI_3001G074000 SORBI_3001G113200 SORBI_3001G120900 SORBI_3001G160200 SORBI_3001G224000 SORBI_3001G257100 SORBI_3001G289100 SORBI_3001G361300 SORBI_3001G387600 SORBI_3001G389300 SORBI_3001G403300 SORBI_3001G437300 SORBI_3001G448700 SORBI_3001G477700 SORBI_3001G482800 SORBI_3001G503100 SORBI_3001G516100 SORBI_3002G214800 SORBI_3002G218300 SORBI_3002G393200 SOR…	S
7.31E-08	53	386	2.606898083	Cellular response to endogenous stimulus	http://amigo.geneontology.org/amigo/term/GO:0071495	SORBI_3001G045000 SORBI_3001G056100 SORBI_3001G074000 SORBI_3001G113200 SORBI_3001G120900 SORBI_3001G160200 SORBI_3001G224000 SORBI_3001G257100 SORBI_3001G289100 SORBI_3001G361300 SORBI_3001G387600 SORBI_3001G389300 SORBI_3001G403300 SORBI_3001G437300 SORBI_3001G448700 SORBI_3001G477700 SORBI_3001G482800 SORBI_3001G503100 SORBI_3001G516100 SORBI_3002G214800 SORBI_3002G218300 SORBI_3002G393200 SOR…	S
1.08E-05	41	311	2.502989083	Reg. of response to stimulus	http://amigo.geneontology.org/amigo/term/GO:0048583	SORBI_3001G010300 SORBI_3001G039900 SORBI_3001G120900 SORBI_3001G121200 SORBI_3001G381800 SORBI_3001G395500 SORBI_3001G448700 SORBI_3001G477700 SORBI_3001G482800 SORBI_3001G515800 SORBI_3002G214800 SORBI_3002G303600 SORBI_3002G338100 SORBI_3002G422300 SORBI_3003G021200 SORBI_3003G053900 SORBI_3003G083200 SORBI_3003G298100 SORBI_3003G337100 SORBI_3003G341100 SORBI_3003G355000 SORBI_3003G359600 SOR…	S
4.61E-08	61	469	2.469405892	Cellular response to organic substance	http://amigo.geneontology.org/amigo/term/GO:0071310	SORBI_3001G045000 SORBI_3001G056100 SORBI_3001G074000 SORBI_3001G113200 SORBI_3001G120900 SORBI_3001G160200 SORBI_3001G224000 SORBI_3001G257100 SORBI_3001G289100 SORBI_3001G361300 SORBI_3001G387600 SORBI_3001G389300 SORBI_3001G403300 SORBI_3001G420100 SORBI_3001G437300 SORBI_3001G448700 SORBI_3001G465100 SORBI_3001G477700 SORBI_3001G482800 SORBI_3001G503100 SORBI_3001G516100 SORBI_3002G214800 SOR…	S
1.78E-08	75	617	2.307871304	Reg. of transcription by RNA polymerase II	http://amigo.geneontology.org/amigo/term/GO:0006357	SORBI_3001G007200 SORBI_3001G075300 SORBI_3001G079100 SORBI_3001G080000 SORBI_3001G127800 SORBI_3001G137100 SORBI_3001G154500 SORBI_3001G219200 SORBI_3001G253900 SORBI_3001G341500 SORBI_3001G372900 SORBI_3001G447400 SORBI_3001G476300 SORBI_3001G488900 SORBI_3001G501000 SORBI_3001G526200 SORBI_3002G141300 SORBI_3002G157000 SORBI_3002G220300 SORBI_3002G225300 SORBI_3002G232900 SORBI_3002G233800 SOR…	S
1.78E-08	81	683	2.251644395	Transcription by RNA polymerase II	http://amigo.geneontology.org/amigo/term/GO:0006366	SORBI_3001G007200 SORBI_3001G075300 SORBI_3001G079100 SORBI_3001G080000 SORBI_3001G127800 SORBI_3001G137100 SORBI_3001G154500 SORBI_3001G219200 SORBI_3001G253900 SORBI_3001G341500 SORBI_3001G372900 SORBI_3001G447400 SORBI_3001G476300 SORBI_3001G488900 SORBI_3001G501000 SORBI_3001G526200 SORBI_3002G133300 SORBI_3002G141300 SORBI_3002G157000 SORBI_3002G220300 SORBI_3002G225300 SORBI_3002G232900 SOR…	S
5.09E-07	73	659	2.103163002	Response to endogenous stimulus	http://amigo.geneontology.org/amigo/term/GO:0009719	SORBI_3001G045000 SORBI_3001G056100 SORBI_3001G074000 SORBI_3001G077400 SORBI_3001G113200 SORBI_3001G120900 SORBI_3001G146400 SORBI_3001G160200 SORBI_3001G196900 SORBI_3001G224000 SORBI_3001G257100 SORBI_3001G289100 SORBI_3001G361300 SORBI_3001G368500 SORBI_3001G387600 SORBI_3001G389300 SORBI_3001G403300 SORBI_3001G437300 SORBI_3001G448700 SORBI_3001G477700 SORBI_3001G482800 SORBI_3001G503100 SOR…	S
7.79E-07	72	655	2.087020352	Response to hormone	http://amigo.geneontology.org/amigo/term/GO:0009725	SORBI_3001G045000 SORBI_3001G056100 SORBI_3001G074000 SORBI_3001G077400 SORBI_3001G113200 SORBI_3001G120900 SORBI_3001G146400 SORBI_3001G160200 SORBI_3001G196900 SORBI_3001G224000 SORBI_3001G257100 SORBI_3001G289100 SORBI_3001G361300 SORBI_3001G368500 SORBI_3001G387600 SORBI_3001G389300 SORBI_3001G403300 SORBI_3001G437300 SORBI_3001G448700 SORBI_3001G477700 SORBI_3001G482800 SORBI_3001G503100 SOR…	S
6.02E-05	58	549	2.005816211	Response to oxygen-containing compound	http://amigo.geneontology.org/amigo/term/GO:1901700	SORBI_3001G045000 SORBI_3001G077400 SORBI_3001G120900 SORBI_3001G128100 SORBI_3001G214300 SORBI_3001G289100 SORBI_3001G361300 SORBI_3001G403300 SORBI_3001G425500 SORBI_3001G425600 SORBI_3001G426000 SORBI_3001G448700 SORBI_3001G465100 SORBI_3001G477700 SORBI_3001G482800 SORBI_3001G515800 SORBI_3001G516100 SORBI_3002G202700 SORBI_3002G214800 SORBI_3002G338100 SORBI_3002G393200 SORBI_3003G034400 SOR…	S
8.81E-07	81	777	1.979244687	Cellular response to chemical stimulus	http://amigo.geneontology.org/amigo/term/GO:0070887	SORBI_3001G045000 SORBI_3001G056100 SORBI_3001G074000 SORBI_3001G113200 SORBI_3001G120900 SORBI_3001G160200 SORBI_3001G198000 SORBI_3001G224000 SORBI_3001G257100 SORBI_3001G277000 SORBI_3001G289100 SORBI_3001G293100 SORBI_3001G361300 SORBI_3001G387600 SORBI_3001G389300 SORBI_3001G403300 SORBI_3001G420100 SORBI_3001G437300 SORBI_3001G448700 SORBI_3001G465100 SORBI_3001G477700 SORBI_3001G482800 SOR…	S
5.09E-07	86	831	1.964865898	Response to organic substance	http://amigo.geneontology.org/amigo/term/GO:0010033	SORBI_3001G045000 SORBI_3001G056100 SORBI_3001G074000 SORBI_3001G077400 SORBI_3001G113200 SORBI_3001G120900 SORBI_3001G146400 SORBI_3001G160200 SORBI_3001G196900 SORBI_3001G224000 SORBI_3001G257100 SORBI_3001G289100 SORBI_3001G361300 SORBI_3001G368500 SORBI_3001G387600 SORBI_3001G389300 SORBI_3001G403300 SORBI_3001G420100 SORBI_3001G437300 SORBI_3001G448700 SORBI_3001G465100 SORBI_3001G477700 SOR…	S
0.000190529	64	653	1.860811068	Protein ubiquitination	http://amigo.geneontology.org/amigo/term/GO:0016567	SORBI_3001G345400 SORBI_3001G387000 SORBI_3001G422900 SORBI_3001G448700 SORBI_3001G449400 SORBI_3001G463100 SORBI_3001G473600 SORBI_3001G476600 SORBI_3001G503500 SORBI_3001G526300 SORBI_3001G539500 SORBI_3002G155500 SORBI_3002G188200 SORBI_3002G192101 SORBI_3002G245800 SORBI_3002G303600 SORBI_3002G314200 SORBI_3002G330800 SORBI_3002G376000 SORBI_3003G006200 SORBI_3003G053900 SORBI_3003G130700 SOR…	S
2.35E-08	128	1330	1.827232522	Response to chemical	http://amigo.geneontology.org/amigo/term/GO:0042221	SORBI_3001G045000 SORBI_3001G056100 SORBI_3001G074000 SORBI_3001G077400 SORBI_3001G113200 SORBI_3001G120900 SORBI_3001G128100 SORBI_3001G146400 SORBI_3001G160200 SORBI_3001G196900 SORBI_3001G198000 SORBI_3001G214300 SORBI_3001G224000 SORBI_3001G257100 SORBI_3001G277000 SORBI_3001G289100 SORBI_3001G293100 SORBI_3001G317000 SORBI_3001G317200 SORBI_3001G318200 SORBI_3001G318500 SORBI_3001G318700 SOR…	S
0.000190529	69	722	1.814459926	Response to abiotic stimulus	http://amigo.geneontology.org/amigo/term/GO:0009628	SORBI_3001G007200 SORBI_3001G039900 SORBI_3001G087100 SORBI_3001G089800 SORBI_3001G105000 SORBI_3001G120900 SORBI_3001G128100 SORBI_3001G128600 SORBI_3001G293800 SORBI_3001G333500 SORBI_3001G389700 SORBI_3001G394400 SORBI_3001G395500 SORBI_3001G425500 SORBI_3001G425600 SORBI_3001G426000 SORBI_3001G477700 SORBI_3001G491000 SORBI_3001G515800 SORBI_3002G225300 SORBI_3002G268900 SORBI_3002G338100 SOR…	S
0.000229032	73	784	1.767837268	Neg. reg. of biological proc.	http://amigo.geneontology.org/amigo/term/GO:0048519	SORBI_3001G039900 SORBI_3001G088900 SORBI_3001G117500 SORBI_3001G120900 SORBI_3001G157600 SORBI_3001G176200 SORBI_3001G217100 SORBI_3001G289100 SORBI_3001G403300 SORBI_3001G477700 SORBI_3001G482800 SORBI_3001G487400 SORBI_3001G512000 SORBI_3001G526200 SORBI_3002G078500 SORBI_3002G093900 SORBI_3002G125900 SORBI_3002G192500 SORBI_3002G202000 SORBI_3002G214800 SORBI_3002G225300 SORBI_3002G233900 SOR…	S
0.000258223	74	802	1.751833549	Protein modification by small protein conjugation or removal	http://amigo.geneontology.org/amigo/term/GO:0070647	SORBI_3001G345400 SORBI_3001G387000 SORBI_3001G422900 SORBI_3001G448700 SORBI_3001G449400 SORBI_3001G463100 SORBI_3001G468500 SORBI_3001G473600 SORBI_3001G476600 SORBI_3001G503500 SORBI_3001G526300 SORBI_3001G539500 SORBI_3002G155500 SORBI_3002G188200 SORBI_3002G192101 SORBI_3002G245800 SORBI_3002G303600 SORBI_3002G314200 SORBI_3002G330800 SORBI_3002G376000 SORBI_3003G006200 SORBI_3003G053900 SOR…	S
1.03E-06	120	1327	1.716903203	Signal transduction	http://amigo.geneontology.org/amigo/term/GO:0007165	SORBI_3001G010300 SORBI_3001G045000 SORBI_3001G056100 SORBI_3001G074000 SORBI_3001G079200 SORBI_3001G087100 SORBI_3001G088900 SORBI_3001G108400 SORBI_3001G113200 SORBI_3001G120900 SORBI_3001G121200 SORBI_3001G160200 SORBI_3001G193000 SORBI_3001G196800 SORBI_3001G224000 SORBI_3001G257100 SORBI_3001G289100 SORBI_3001G361300 SORBI_3001G387600 SORBI_3001G389300 SORBI_3001G394400 SORBI_3001G403300 SOR…	S
1.79E-06	120	1342	1.69771278	Signaling	http://amigo.geneontology.org/amigo/term/GO:0023052	SORBI_3001G010300 SORBI_3001G045000 SORBI_3001G056100 SORBI_3001G074000 SORBI_3001G079200 SORBI_3001G087100 SORBI_3001G088900 SORBI_3001G108400 SORBI_3001G113200 SORBI_3001G120900 SORBI_3001G121200 SORBI_3001G160200 SORBI_3001G193000 SORBI_3001G196800 SORBI_3001G224000 SORBI_3001G257100 SORBI_3001G289100 SORBI_3001G361300 SORBI_3001G387600 SORBI_3001G389300 SORBI_3001G394400 SORBI_3001G403300 SOR…	S
1.91E-05	126	1495	1.60016527	Cell communication	http://amigo.geneontology.org/amigo/term/GO:0007154	SORBI_3001G010300 SORBI_3001G045000 SORBI_3001G056100 SORBI_3001G074000 SORBI_3001G079200 SORBI_3001G087100 SORBI_3001G088900 SORBI_3001G108400 SORBI_3001G113200 SORBI_3001G120900 SORBI_3001G121200 SORBI_3001G160200 SORBI_3001G193000 SORBI_3001G196800 SORBI_3001G224000 SORBI_3001G257100 SORBI_3001G289100 SORBI_3001G361300 SORBI_3001G387600 SORBI_3001G389300 SORBI_3001G394400 SORBI_3001G403300 SOR…	S
0.003871676	3	4	37.57488987	Detection of visible light	http://amigo.geneontology.org/amigo/term/GO:0009584	SORBI_3001G087100 SORBI_3001G111366 SORBI_3001G111500	M1
0.007872931	3	5	30.05991189	Cellular response to nitrate	http://amigo.geneontology.org/amigo/term/GO:0071249	SORBI_3004G009200 SORBI_3004G009400 SORBI_3004G009500	M1
0.015802051	3	7	21.47136564	Protein glutathionylation	http://amigo.geneontology.org/amigo/term/GO:0010731	SORBI_3001G412700 SORBI_3001G412800 SORBI_3009G017732	M1
0.012635152	4	15	13.35996084	Galactose catabolic proc. via UDP-galactose	http://amigo.geneontology.org/amigo/term/GO:0033499	SORBI_3006G104700 SORBI_3006G105000 SORBI_3006G105100 SORBI_3006G105200	M1
0.012635152	4	15	13.35996084	Detection of external stimulus	http://amigo.geneontology.org/amigo/term/GO:0009581	SORBI_3001G087100 SORBI_3001G111366 SORBI_3001G111500 SORBI_3010G077300	M1
9.88E-05	9	45	10.01997063	Toxin catabolic proc.	http://amigo.geneontology.org/amigo/term/GO:0009407	SORBI_3001G317600 SORBI_3001G317700 SORBI_3001G318000 SORBI_3001G318300 SORBI_3001G318500 SORBI_3001G318800 SORBI_3001G318900 SORBI_3001G319100 SORBI_3001G319200	M1
0.000160037	9	49	9.202013845	Toxin metabolic proc.	http://amigo.geneontology.org/amigo/term/GO:0009404	SORBI_3001G317600 SORBI_3001G317700 SORBI_3001G318000 SORBI_3001G318300 SORBI_3001G318500 SORBI_3001G318800 SORBI_3001G318900 SORBI_3001G319100 SORBI_3001G319200	M1
5.86E-08	18	122	7.391781613	Glutathione metabolic proc.	http://amigo.geneontology.org/amigo/term/GO:0006749	SORBI_3001G317600 SORBI_3001G317700 SORBI_3001G318000 SORBI_3001G318300 SORBI_3001G318500 SORBI_3001G318600 SORBI_3001G318800 SORBI_3001G318900 SORBI_3001G319000 SORBI_3001G319100 SORBI_3001G319200 SORBI_3001G319300 SORBI_3001G412700 SORBI_3001G412800 SORBI_3001G514300 SORBI_3009G017732 SORBI_3009G043700 SORBI_3009G044000	M1
3.56E-06	18	163	5.532499122	Cellular modified amino acid metabolic proc.	http://amigo.geneontology.org/amigo/term/GO:0006575	SORBI_3001G317600 SORBI_3001G317700 SORBI_3001G318000 SORBI_3001G318300 SORBI_3001G318500 SORBI_3001G318600 SORBI_3001G318800 SORBI_3001G318900 SORBI_3001G319000 SORBI_3001G319100 SORBI_3001G319200 SORBI_3001G319300 SORBI_3001G412700 SORBI_3001G412800 SORBI_3001G514300 SORBI_3009G017732 SORBI_3009G043700 SORBI_3009G044000	M1
0.007872931	12	156	3.853834858	Cell wall macromolecule metabolic proc.	http://amigo.geneontology.org/amigo/term/GO:0044036	SORBI_3002G019000 SORBI_3002G019100 SORBI_3002G019200 SORBI_3003G087900 SORBI_3003G410700 SORBI_3004G273200 SORBI_3006G132300 SORBI_3006G132400 SORBI_3006G132500 SORBI_3006G205600 SORBI_3009G220200 SORBI_3010G082300	M1
0.001184967	16	209	3.835395457	Glycosylation	http://amigo.geneontology.org/amigo/term/GO:0070085	SORBI_3001G033500 SORBI_3001G506500 SORBI_3001G506600 SORBI_3002G019000 SORBI_3002G019100 SORBI_3002G019200 SORBI_3002G334000 SORBI_3002G334100 SORBI_3002G334200 SORBI_3003G087900 SORBI_3003G375300 SORBI_3003G410700 SORBI_3006G186800 SORBI_3009G220200 SORBI_3010G082300 SORBI_3010G093100	M1
0.003871676	14	187	3.750791145	Cell wall biogenesis	http://amigo.geneontology.org/amigo/term/GO:0042546	SORBI_3002G019000 SORBI_3002G019100 SORBI_3002G019200 SORBI_3002G244300 SORBI_3002G334000 SORBI_3002G334100 SORBI_3002G334200 SORBI_3002G357900 SORBI_3003G087900 SORBI_3003G410700 SORBI_3004G273200 SORBI_3006G205600 SORBI_3009G220200 SORBI_3010G082300	M1
0.009540808	14	213	3.292948095	Polysaccharide biosynthetic proc.	http://amigo.geneontology.org/amigo/term/GO:0000271	SORBI_3002G019000 SORBI_3002G019100 SORBI_3002G019200 SORBI_3002G233600 SORBI_3002G274700 SORBI_3002G334000 SORBI_3002G334100 SORBI_3002G334200 SORBI_3003G326900 SORBI_3003G410700 SORBI_3004G244100 SORBI_3009G220200 SORBI_3010G082300 SORBI_3010G093100	M1
0.000407644	22	338	3.260937188	Sulfur compound metabolic proc.	http://amigo.geneontology.org/amigo/term/GO:0006790	SORBI_3001G317600 SORBI_3001G317700 SORBI_3001G318000 SORBI_3001G318300 SORBI_3001G318500 SORBI_3001G318600 SORBI_3001G318800 SORBI_3001G318900 SORBI_3001G319000 SORBI_3001G319100 SORBI_3001G319200 SORBI_3001G319300 SORBI_3001G412700 SORBI_3001G412800 SORBI_3001G514300 SORBI_3003G105101 SORBI_3003G191000 SORBI_3006G214200 SORBI_3009G017732 SORBI_3009G043700 SORBI_3009G044000 SORBI_3010G045966	M1
0.003871676	18	288	3.131240822	Detoxification	http://amigo.geneontology.org/amigo/term/GO:0098754	SORBI_3001G277000 SORBI_3001G317600 SORBI_3001G317700 SORBI_3001G318000 SORBI_3001G318300 SORBI_3001G318500 SORBI_3001G318800 SORBI_3001G318900 SORBI_3001G319100 SORBI_3001G319200 SORBI_3002G391700 SORBI_3002G391900 SORBI_3003G121000 SORBI_3003G140600 SORBI_3004G105200 SORBI_3004G225000 SORBI_3006G277550 SORBI_3009G017732	M1
0.003871676	18	293	3.077806679	Response to toxic substance	http://amigo.geneontology.org/amigo/term/GO:0009636	SORBI_3001G277000 SORBI_3001G317600 SORBI_3001G317700 SORBI_3001G318000 SORBI_3001G318300 SORBI_3001G318500 SORBI_3001G318800 SORBI_3001G318900 SORBI_3001G319100 SORBI_3001G319200 SORBI_3002G391700 SORBI_3002G391900 SORBI_3003G121000 SORBI_3003G140600 SORBI_3004G105200 SORBI_3004G225000 SORBI_3006G277550 SORBI_3009G017732	M1
0.003871676	22	410	2.688284804	Polysaccharide metabolic proc.	http://amigo.geneontology.org/amigo/term/GO:0005976	SORBI_3001G089300 SORBI_3002G019000 SORBI_3002G019100 SORBI_3002G019200 SORBI_3002G233600 SORBI_3002G274700 SORBI_3002G334000 SORBI_3002G334100 SORBI_3002G334200 SORBI_3003G326900 SORBI_3003G410700 SORBI_3004G244100 SORBI_3004G244600 SORBI_3004G273200 SORBI_3006G105500 SORBI_3006G132300 SORBI_3006G132400 SORBI_3006G132500 SORBI_3006G205600 SORBI_3009G220200 SORBI_3010G082300 SORBI_3010G093100	M1
0.007904688	25	532	2.354316408	Cell wall organization or biogenesis	http://amigo.geneontology.org/amigo/term/GO:0071554	SORBI_3001G033500 SORBI_3001G075600 SORBI_3001G499701 SORBI_3001G499800 SORBI_3002G019000 SORBI_3002G019100 SORBI_3002G019200 SORBI_3002G244300 SORBI_3002G274700 SORBI_3002G334000 SORBI_3002G334100 SORBI_3002G334200 SORBI_3002G357900 SORBI_3002G391700 SORBI_3003G087900 SORBI_3003G140600 SORBI_3003G410700 SORBI_3004G273200 SORBI_3006G105500 SORBI_3006G132300 SORBI_3006G132400 SORBI_3006G132500 SOR…	M1
0.010758273	47	1330	1.770445939	Response to chemical	http://amigo.geneontology.org/amigo/term/GO:0042221	SORBI_3001G056100 SORBI_3001G061600 SORBI_3001G214300 SORBI_3001G277000 SORBI_3001G317600 SORBI_3001G317700 SORBI_3001G318000 SORBI_3001G318300 SORBI_3001G318500 SORBI_3001G318800 SORBI_3001G318900 SORBI_3001G319100 SORBI_3001G319200 SORBI_3001G368500 SORBI_3001G391500 SORBI_3001G418600 SORBI_3001G422700 SORBI_3001G515800 SORBI_3001G524100 SORBI_3002G202700 SORBI_3002G214800 SORBI_3002G338100 SOR…	M1
0.030599765	9	88	4.479256623	Mitotic cell cycle phase transition	http://amigo.geneontology.org/amigo/term/GO:0044772	SORBI_3001G443300 SORBI_3001G464800 SORBI_3002G144800 SORBI_3002G230900 SORBI_3003G361200 SORBI_3005G138300 SORBI_3006G179200 SORBI_3007G187700 SORBI_3010G067900	M2
0.030599765	10	109	4.018089529	Cell cycle phase transition	http://amigo.geneontology.org/amigo/term/GO:0044770	SORBI_3001G443300 SORBI_3001G464800 SORBI_3002G144800 SORBI_3002G230900 SORBI_3003G361200 SORBI_3005G138300 SORBI_3006G179200 SORBI_3006G242500 SORBI_3007G187700 SORBI_3010G067900	M2
0.028769812	16	236	2.969300059	Reg. of cell cycle	http://amigo.geneontology.org/amigo/term/GO:0051726	SORBI_3001G222300 SORBI_3001G443300 SORBI_3001G464800 SORBI_3002G144800 SORBI_3002G191000 SORBI_3002G230900 SORBI_3003G027800 SORBI_3003G033000 SORBI_3003G269000 SORBI_3003G361200 SORBI_3005G138300 SORBI_3006G179200 SORBI_3006G242500 SORBI_3007G187700 SORBI_3009G217300 SORBI_3010G067900	M2
0.028769812	19	313	2.658614509	Defense response to other organism	http://amigo.geneontology.org/amigo/term/GO:0098542	SORBI_3001G078200 SORBI_3001G082200 SORBI_3001G083800 SORBI_3001G145000 SORBI_3001G381800 SORBI_3001G410100 SORBI_3001G497000 SORBI_3002G248400 SORBI_3002G418900 SORBI_3003G225900 SORBI_3003G399700 SORBI_3004G076100 SORBI_3004G223000 SORBI_3004G262500 SORBI_3004G276400 SORBI_3004G312800 SORBI_3007G013400 SORBI_3009G026800 SORBI_3010G112000	M2
0.028769812	19	315	2.641734417	Immune system proc.	http://amigo.geneontology.org/amigo/term/GO:0002376	SORBI_3001G078200 SORBI_3001G082200 SORBI_3001G083800 SORBI_3001G145000 SORBI_3001G381800 SORBI_3001G410100 SORBI_3001G497000 SORBI_3002G248400 SORBI_3002G418900 SORBI_3003G225900 SORBI_3003G399700 SORBI_3004G076100 SORBI_3004G223000 SORBI_3004G262500 SORBI_3004G276400 SORBI_3004G312800 SORBI_3007G013400 SORBI_3009G026800 SORBI_3010G112000	M2
0.028769812	19	315	2.641734417	Immune response	http://amigo.geneontology.org/amigo/term/GO:0006955	SORBI_3001G078200 SORBI_3001G082200 SORBI_3001G083800 SORBI_3001G145000 SORBI_3001G381800 SORBI_3001G410100 SORBI_3001G497000 SORBI_3002G248400 SORBI_3002G418900 SORBI_3003G225900 SORBI_3003G399700 SORBI_3004G076100 SORBI_3004G223000 SORBI_3004G262500 SORBI_3004G276400 SORBI_3004G312800 SORBI_3007G013400 SORBI_3009G026800 SORBI_3010G112000	M2
0.028769812	20	341	2.568749318	Response to other organism	http://amigo.geneontology.org/amigo/term/GO:0051707	SORBI_3001G078200 SORBI_3001G082200 SORBI_3001G083800 SORBI_3001G145000 SORBI_3001G381800 SORBI_3001G410100 SORBI_3001G427900 SORBI_3001G497000 SORBI_3002G248400 SORBI_3002G418900 SORBI_3003G225900 SORBI_3003G399700 SORBI_3004G076100 SORBI_3004G223000 SORBI_3004G262500 SORBI_3004G276400 SORBI_3004G312800 SORBI_3007G013400 SORBI_3009G026800 SORBI_3010G112000	M2
0.028880145	20	345	2.538966717	Response to external biotic stimulus	http://amigo.geneontology.org/amigo/term/GO:0043207	SORBI_3001G078200 SORBI_3001G082200 SORBI_3001G083800 SORBI_3001G145000 SORBI_3001G381800 SORBI_3001G410100 SORBI_3001G427900 SORBI_3001G497000 SORBI_3002G248400 SORBI_3002G418900 SORBI_3003G225900 SORBI_3003G399700 SORBI_3004G076100 SORBI_3004G223000 SORBI_3004G262500 SORBI_3004G276400 SORBI_3004G312800 SORBI_3007G013400 SORBI_3009G026800 SORBI_3010G112000	M2
0.034146182	20	358	2.446769601	Biological proc. involved in interspecies interaction between organisms	http://amigo.geneontology.org/amigo/term/GO:0044419	SORBI_3001G078200 SORBI_3001G082200 SORBI_3001G083800 SORBI_3001G145000 SORBI_3001G381800 SORBI_3001G410100 SORBI_3001G427900 SORBI_3001G497000 SORBI_3002G248400 SORBI_3002G418900 SORBI_3003G225900 SORBI_3003G399700 SORBI_3004G076100 SORBI_3004G223000 SORBI_3004G262500 SORBI_3004G276400 SORBI_3004G312800 SORBI_3007G013400 SORBI_3009G026800 SORBI_3010G112000	M2
0.028769812	26	504	2.25937812	Response to external stimulus	http://amigo.geneontology.org/amigo/term/GO:0009605	SORBI_3001G078200 SORBI_3001G082200 SORBI_3001G083800 SORBI_3001G145000 SORBI_3001G381800 SORBI_3001G410100 SORBI_3001G427900 SORBI_3001G497000 SORBI_3002G248400 SORBI_3002G418900 SORBI_3003G225900 SORBI_3003G399700 SORBI_3004G076100 SORBI_3004G223000 SORBI_3004G262500 SORBI_3004G276400 SORBI_3004G312800 SORBI_3006G061100 SORBI_3007G011300 SORBI_3007G013400 SORBI_3009G026500 SORBI_3009G026800 SOR…	M2
0.038116056	32	719	1.949248439	Reproduction	http://amigo.geneontology.org/amigo/term/GO:0000003	SORBI_3001G039900 SORBI_3001G070900 SORBI_3001G078200 SORBI_3001G145000 SORBI_3001G199000 SORBI_3001G234200 SORBI_3001G300700 SORBI_3001G301300 SORBI_3001G301500 SORBI_3001G301600 SORBI_3001G410100 SORBI_3001G511200 SORBI_3002G257750 SORBI_3002G412100 SORBI_3003G033000 SORBI_3003G127500 SORBI_3003G319600 SORBI_3004G036700 SORBI_3004G070200 SORBI_3004G107200 SORBI_3004G110700 SORBI_3004G116100 SOR…	M2
0.028769812	52	1321	1.724037203	Developmental proc.	http://amigo.geneontology.org/amigo/term/GO:0032502	SORBI_3001G039900 SORBI_3001G078200 SORBI_3001G145000 SORBI_3001G160200 SORBI_3001G199000 SORBI_3001G234200 SORBI_3001G358800 SORBI_3001G410100 SORBI_3001G440800 SORBI_3001G443300 SORBI_3001G487200 SORBI_3001G508400 SORBI_3002G257750 SORBI_3002G268900 SORBI_3002G273300 SORBI_3002G279100 SORBI_3002G320600 SORBI_3002G412100 SORBI_3003G127500 SORBI_3003G303800 SORBI_3003G375000 SORBI_3003G387600 SOR…	M2
0.000106358	26	213	2.936980605	Polysaccharide biosynthetic proc.	http://amigo.geneontology.org/amigo/term/GO:0000271	SORBI_3001G131900 SORBI_3001G338400 SORBI_3001G384200 SORBI_3001G409100 SORBI_3001G460000 SORBI_3002G233600 SORBI_3002G274700 SORBI_3002G334000 SORBI_3002G334100 SORBI_3002G334200 SORBI_3002G368600 SORBI_3002G420100 SORBI_3003G005900 SORBI_3003G296400 SORBI_3003G326900 SORBI_3003G410600 SORBI_3003G410700 SORBI_3003G410800 SORBI_3006G221000 SORBI_3006G242100 SORBI_3009G024600 SORBI_3009G220100 SOR…	SM1
1.58E-07	44	374	2.830664565	Hormone-mediated signaling pathway	http://amigo.geneontology.org/amigo/term/GO:0009755	SORBI_3001G045000 SORBI_3001G056100 SORBI_3001G074000 SORBI_3001G078800 SORBI_3001G124200 SORBI_3001G168400 SORBI_3001G290500 SORBI_3001G361300 SORBI_3001G387600 SORBI_3001G477700 SORBI_3001G482800 SORBI_3001G503100 SORBI_3001G516100 SORBI_3001G524100 SORBI_3002G214800 SORBI_3002G282500 SORBI_3002G343500 SORBI_3002G344700 SORBI_3002G393200 SORBI_3003G034400 SORBI_3003G044900 SORBI_3003G332200 SOR…	SM1
1.58E-07	45	386	2.804997917	Cellular response to endogenous stimulus	http://amigo.geneontology.org/amigo/term/GO:0071495	SORBI_3001G045000 SORBI_3001G056100 SORBI_3001G074000 SORBI_3001G078800 SORBI_3001G124200 SORBI_3001G168400 SORBI_3001G290500 SORBI_3001G361300 SORBI_3001G387600 SORBI_3001G477700 SORBI_3001G482800 SORBI_3001G503100 SORBI_3001G516100 SORBI_3001G524100 SORBI_3002G214800 SORBI_3002G282500 SORBI_3002G343500 SORBI_3002G344700 SORBI_3002G393200 SORBI_3003G034400 SORBI_3003G044900 SORBI_3003G332200 SOR…	SM1
3.75E-05	32	278	2.769571085	Cellular response to oxygen-containing compound	http://amigo.geneontology.org/amigo/term/GO:1901701	SORBI_3001G045000 SORBI_3001G078800 SORBI_3001G168400 SORBI_3001G290500 SORBI_3001G361300 SORBI_3001G401700 SORBI_3001G465100 SORBI_3001G477700 SORBI_3001G482800 SORBI_3001G516100 SORBI_3001G524100 SORBI_3002G214800 SORBI_3002G282500 SORBI_3002G338100 SORBI_3002G343500 SORBI_3002G344700 SORBI_3002G393200 SORBI_3003G034400 SORBI_3003G332200 SORBI_3003G341100 SORBI_3003G359600 SORBI_3003G368300 SOR…	SM1
6.63E-08	50	442	2.721792851	Intracellular signal transduction	http://amigo.geneontology.org/amigo/term/GO:0035556	SORBI_3001G010300 SORBI_3001G045000 SORBI_3001G078800 SORBI_3001G079200 SORBI_3001G087100 SORBI_3001G088900 SORBI_3001G111366 SORBI_3001G111500 SORBI_3001G117200 SORBI_3001G124200 SORBI_3001G168400 SORBI_3001G193000 SORBI_3001G196800 SORBI_3001G301200 SORBI_3001G361300 SORBI_3001G387600 SORBI_3001G394400 SORBI_3001G404700 SORBI_3001G450500 SORBI_3002G283300 SORBI_3002G299600 SORBI_3002G343500 SOR…	SM1
6.63E-08	52	469	2.667705198	Cellular response to organic substance	http://amigo.geneontology.org/amigo/term/GO:0071310	SORBI_3001G045000 SORBI_3001G056100 SORBI_3001G074000 SORBI_3001G078800 SORBI_3001G124200 SORBI_3001G168400 SORBI_3001G290500 SORBI_3001G361300 SORBI_3001G387600 SORBI_3001G401700 SORBI_3001G420100 SORBI_3001G465100 SORBI_3001G477700 SORBI_3001G482800 SORBI_3001G503100 SORBI_3001G516100 SORBI_3001G524100 SORBI_3002G214800 SORBI_3002G282500 SORBI_3002G299000 SORBI_3002G338100 SORBI_3002G343500 SOR…	SM1
5.05E-05	34	311	2.630424628	Reg. of response to stimulus	http://amigo.geneontology.org/amigo/term/GO:0048583	SORBI_3001G010300 SORBI_3001G121200 SORBI_3001G301200 SORBI_3001G477700 SORBI_3001G482800 SORBI_3001G524100 SORBI_3002G214800 SORBI_3002G282500 SORBI_3002G303600 SORBI_3002G338100 SORBI_3002G344700 SORBI_3003G021200 SORBI_3003G049400 SORBI_3003G083200 SORBI_3003G324400 SORBI_3003G341100 SORBI_3003G359600 SORBI_3003G368300 SORBI_3003G370700 SORBI_3003G389000 SORBI_3003G408800 SORBI_3004G188500 SOR…	SM1
1.58E-07	71	777	2.198592104	Cellular response to chemical stimulus	http://amigo.geneontology.org/amigo/term/GO:0070887	SORBI_3001G045000 SORBI_3001G056100 SORBI_3001G074000 SORBI_3001G078800 SORBI_3001G080200 SORBI_3001G124200 SORBI_3001G168400 SORBI_3001G277000 SORBI_3001G290500 SORBI_3001G361300 SORBI_3001G387600 SORBI_3001G401700 SORBI_3001G420100 SORBI_3001G465100 SORBI_3001G477700 SORBI_3001G482800 SORBI_3001G503100 SORBI_3001G516100 SORBI_3001G524100 SORBI_3002G194600 SORBI_3002G214800 SORBI_3002G282500 SOR…	SM1
9.21E-11	115	1327	2.085135352	Signal transduction	http://amigo.geneontology.org/amigo/term/GO:0007165	SORBI_3001G010300 SORBI_3001G045000 SORBI_3001G056100 SORBI_3001G074000 SORBI_3001G078800 SORBI_3001G079200 SORBI_3001G087100 SORBI_3001G088900 SORBI_3001G111366 SORBI_3001G111500 SORBI_3001G117200 SORBI_3001G121200 SORBI_3001G124200 SORBI_3001G168400 SORBI_3001G193000 SORBI_3001G196800 SORBI_3001G290500 SORBI_3001G301200 SORBI_3001G335000 SORBI_3001G335400 SORBI_3001G361300 SORBI_3001G387600 SOR…	SM1
9.45E-05	51	590	2.079818795	Cellular protein localization	http://amigo.geneontology.org/amigo/term/GO:0034613	SORBI_3001G013100 SORBI_3001G031400 SORBI_3001G064900 SORBI_3001G067900 SORBI_3001G115500 SORBI_3001G219600 SORBI_3001G230900 SORBI_3001G287500 SORBI_3001G411900 SORBI_3001G420800 SORBI_3001G423300 SORBI_3001G451300 SORBI_3001G478300 SORBI_3002G070300 SORBI_3002G090700 SORBI_3002G166300 SORBI_3002G276100 SORBI_3002G294200 SORBI_3002G338100 SORBI_3002G362700 SORBI_3002G368400 SORBI_3003G006300 SOR…	SM1
8.45E-05	52	602	2.078328468	Cellular macromolecule localization	http://amigo.geneontology.org/amigo/term/GO:0070727	SORBI_3001G013100 SORBI_3001G031400 SORBI_3001G064900 SORBI_3001G067900 SORBI_3001G115500 SORBI_3001G219600 SORBI_3001G230900 SORBI_3001G287500 SORBI_3001G411900 SORBI_3001G420800 SORBI_3001G423300 SORBI_3001G451300 SORBI_3001G478300 SORBI_3002G070300 SORBI_3002G090700 SORBI_3002G166300 SORBI_3002G276100 SORBI_3002G294200 SORBI_3002G338100 SORBI_3002G362700 SORBI_3002G368400 SORBI_3003G006300 SOR…	SM1
8.33E-05	53	617	2.066798033	Reg. of transcription by RNA polymerase II	http://amigo.geneontology.org/amigo/term/GO:0006357	SORBI_3001G007200 SORBI_3001G079100 SORBI_3001G127800 SORBI_3001G137100 SORBI_3001G219200 SORBI_3001G253900 SORBI_3001G341500 SORBI_3001G372900 SORBI_3001G476300 SORBI_3001G476500 SORBI_3001G488900 SORBI_3001G501000 SORBI_3002G233800 SORBI_3002G353800 SORBI_3002G362900 SORBI_3002G383300 SORBI_3002G408800 SORBI_3003G049400 SORBI_3003G101300 SORBI_3003G119400 SORBI_3003G142300 SORBI_3003G270300 SOR…	SM1
1.28E-10	115	1342	2.06182907	Signaling	http://amigo.geneontology.org/amigo/term/GO:0023052	SORBI_3001G010300 SORBI_3001G045000 SORBI_3001G056100 SORBI_3001G074000 SORBI_3001G078800 SORBI_3001G079200 SORBI_3001G087100 SORBI_3001G088900 SORBI_3001G111366 SORBI_3001G111500 SORBI_3001G117200 SORBI_3001G121200 SORBI_3001G124200 SORBI_3001G168400 SORBI_3001G193000 SORBI_3001G196800 SORBI_3001G290500 SORBI_3001G301200 SORBI_3001G335000 SORBI_3001G335400 SORBI_3001G361300 SORBI_3001G387600 SOR…	SM1
6.09E-05	56	659	2.044607485	Response to endogenous stimulus	http://amigo.geneontology.org/amigo/term/GO:0009719	SORBI_3001G045000 SORBI_3001G056100 SORBI_3001G061600 SORBI_3001G074000 SORBI_3001G078800 SORBI_3001G124200 SORBI_3001G168400 SORBI_3001G196900 SORBI_3001G290500 SORBI_3001G360900 SORBI_3001G361300 SORBI_3001G368500 SORBI_3001G387600 SORBI_3001G401700 SORBI_3001G477700 SORBI_3001G482800 SORBI_3001G503100 SORBI_3001G516100 SORBI_3001G524100 SORBI_3002G186900 SORBI_3002G213600 SORBI_3002G214800 SOR…	SM1
2.77E-10	113	1330	2.044250612	Response to chemical	http://amigo.geneontology.org/amigo/term/GO:0042221	SORBI_3001G045000 SORBI_3001G056100 SORBI_3001G061600 SORBI_3001G074000 SORBI_3001G078800 SORBI_3001G080200 SORBI_3001G124200 SORBI_3001G128100 SORBI_3001G168400 SORBI_3001G196900 SORBI_3001G214300 SORBI_3001G277000 SORBI_3001G290500 SORBI_3001G317000 SORBI_3001G318000 SORBI_3001G318200 SORBI_3001G318300 SORBI_3001G318500 SORBI_3001G318700 SORBI_3001G319200 SORBI_3001G335000 SORBI_3001G360900 SOR…	SM1
4.31E-06	70	831	2.026769454	Response to organic substance	http://amigo.geneontology.org/amigo/term/GO:0010033	SORBI_3001G045000 SORBI_3001G056100 SORBI_3001G061600 SORBI_3001G074000 SORBI_3001G078800 SORBI_3001G124200 SORBI_3001G168400 SORBI_3001G196900 SORBI_3001G290500 SORBI_3001G335000 SORBI_3001G360900 SORBI_3001G361300 SORBI_3001G368500 SORBI_3001G387600 SORBI_3001G390500 SORBI_3001G400300 SORBI_3001G401700 SORBI_3001G420100 SORBI_3001G465100 SORBI_3001G477700 SORBI_3001G482800 SORBI_3001G503100 SOR…	SM1
9.32E-05	55	655	2.020359823	Response to hormone	http://amigo.geneontology.org/amigo/term/GO:0009725	SORBI_3001G045000 SORBI_3001G056100 SORBI_3001G061600 SORBI_3001G074000 SORBI_3001G078800 SORBI_3001G124200 SORBI_3001G168400 SORBI_3001G196900 SORBI_3001G290500 SORBI_3001G360900 SORBI_3001G361300 SORBI_3001G368500 SORBI_3001G387600 SORBI_3001G401700 SORBI_3001G477700 SORBI_3001G482800 SORBI_3001G503100 SORBI_3001G516100 SORBI_3001G524100 SORBI_3002G186900 SORBI_3002G213600 SORBI_3002G214800 SOR…	SM1
9.21E-11	125	1495	2.011759933	Cell communication	http://amigo.geneontology.org/amigo/term/GO:0007154	SORBI_3001G010300 SORBI_3001G045000 SORBI_3001G056100 SORBI_3001G074000 SORBI_3001G078800 SORBI_3001G079200 SORBI_3001G087100 SORBI_3001G088900 SORBI_3001G111366 SORBI_3001G111500 SORBI_3001G117200 SORBI_3001G121200 SORBI_3001G124200 SORBI_3001G168400 SORBI_3001G193000 SORBI_3001G196800 SORBI_3001G204900 SORBI_3001G290500 SORBI_3001G301200 SORBI_3001G335000 SORBI_3001G335400 SORBI_3001G361300 SOR…	SM1
3.75E-05	69	865	1.919288748	Cellular localization	http://amigo.geneontology.org/amigo/term/GO:0051641	SORBI_3001G013100 SORBI_3001G031400 SORBI_3001G064900 SORBI_3001G067900 SORBI_3001G115500 SORBI_3001G212300 SORBI_3001G219600 SORBI_3001G230900 SORBI_3001G287500 SORBI_3001G288800 SORBI_3001G411900 SORBI_3001G420800 SORBI_3001G423300 SORBI_3001G451300 SORBI_3001G478300 SORBI_3002G070300 SORBI_3002G083800 SORBI_3002G090700 SORBI_3002G166300 SORBI_3002G194600 SORBI_3002G276100 SORBI_3002G294200 SOR…	SM1
0.000170636	16	91	4.2037626	Leaf development	http://amigo.geneontology.org/amigo/term/GO:0048366	SORBI_3001G145000 SORBI_3003G034400 SORBI_3003G110400 SORBI_3003G219400 SORBI_3003G277900 SORBI_3003G398400 SORBI_3003G407300 SORBI_3003G407900 SORBI_3003G416400 SORBI_3004G058600 SORBI_3004G065000 SORBI_3004G107200 SORBI_3005G017500 SORBI_3006G125900 SORBI_3006G214400 SORBI_3006G279200	SM2
4.47E-05	30	236	3.039266922	Reg. of cell cycle	http://amigo.geneontology.org/amigo/term/GO:0051726	SORBI_3001G079700 SORBI_3001G193000 SORBI_3001G206100 SORBI_3001G222300 SORBI_3001G429300 SORBI_3001G501000 SORBI_3002G144800 SORBI_3002G191000 SORBI_3002G230900 SORBI_3002G313000 SORBI_3002G362900 SORBI_3002G408800 SORBI_3003G027800 SORBI_3003G033000 SORBI_3003G361200 SORBI_3004G288600 SORBI_3004G302600 SORBI_3004G307700 SORBI_3005G138300 SORBI_3006G126700 SORBI_3006G128900 SORBI_3006G179200 SOR…	SM2
0.000136705	26	207	3.003050215	Reg. of phosphate metabolic proc.	http://amigo.geneontology.org/amigo/term/GO:0019220	SORBI_3001G193000 SORBI_3001G222300 SORBI_3001G289100 SORBI_3001G403300 SORBI_3001G429300 SORBI_3001G451400 SORBI_3002G144800 SORBI_3002G191000 SORBI_3002G230900 SORBI_3002G313000 SORBI_3002G398500 SORBI_3003G200200 SORBI_3003G209200 SORBI_3003G412400 SORBI_3004G065000 SORBI_3004G074900 SORBI_3004G288600 SORBI_3004G302600 SORBI_3004G307700 SORBI_3005G029100 SORBI_3006G061100 SORBI_3006G126100 SOR…	SM2
0.000135128	28	230	2.91064867	Protein dephosphorylation	http://amigo.geneontology.org/amigo/term/GO:0006470	SORBI_3001G043800 SORBI_3001G154900 SORBI_3001G289100 SORBI_3001G347700 SORBI_3001G358800 SORBI_3001G403300 SORBI_3002G076500 SORBI_3002G172000 SORBI_3002G362800 SORBI_3002G427300 SORBI_3003G198200 SORBI_3003G200200 SORBI_3003G209200 SORBI_3003G229300 SORBI_3003G363500 SORBI_3004G074900 SORBI_3004G096300 SORBI_3005G038600 SORBI_3006G126100 SORBI_3006G209400 SORBI_3007G024700 SORBI_3008G173900 SOR…	SM2
0.000317714	26	225	2.762806198	Reg. of protein modification proc.	http://amigo.geneontology.org/amigo/term/GO:0031399	SORBI_3001G193000 SORBI_3001G222300 SORBI_3001G289100 SORBI_3001G403300 SORBI_3001G429300 SORBI_3001G526300 SORBI_3002G144800 SORBI_3002G191000 SORBI_3002G230900 SORBI_3002G313000 SORBI_3002G398500 SORBI_3003G200200 SORBI_3003G209200 SORBI_3004G065000 SORBI_3004G074900 SORBI_3004G288600 SORBI_3004G302600 SORBI_3004G307700 SORBI_3006G061100 SORBI_3006G126100 SORBI_3006G179200 SORBI_3007G024700 SOR…	SM2
6.29E-05	40	385	2.484041537	Organophosphate biosynthetic proc.	http://amigo.geneontology.org/amigo/term/GO:0090407	SORBI_3001G121900 SORBI_3001G203400 SORBI_3001G356100 SORBI_3001G451400 SORBI_3001G481900 SORBI_3001G520200 SORBI_3001G530500 SORBI_3002G214400 SORBI_3002G291400 SORBI_3002G405400 SORBI_3003G118200 SORBI_3003G193700 SORBI_3003G209200 SORBI_3003G221200 SORBI_3003G241000 SORBI_3003G266500 SORBI_3003G266600 SORBI_3003G301900 SORBI_3003G427200 SORBI_3003G427300 SORBI_3003G432100 SORBI_3004G025400 SOR…	SM2
0.000258407	35	349	2.397740667	Response to lipid	http://amigo.geneontology.org/amigo/term/GO:0033993	SORBI_3001G030400 SORBI_3001G045000 SORBI_3001G049300 SORBI_3001G063600 SORBI_3001G077400 SORBI_3001G154900 SORBI_3001G168400 SORBI_3001G289100 SORBI_3001G403300 SORBI_3001G477700 SORBI_3002G279100 SORBI_3002G377300 SORBI_3002G393200 SORBI_3003G034400 SORBI_3003G277900 SORBI_3003G355000 SORBI_3003G359600 SORBI_3003G366000 SORBI_3003G368300 SORBI_3003G407300 SORBI_3004G208000 SORBI_3004G305600 SOR…	SM2
0.000136705	42	442	2.271886405	Intracellular signal transduction	http://amigo.geneontology.org/amigo/term/GO:0035556	SORBI_3001G042200 SORBI_3001G045000 SORBI_3001G063600 SORBI_3001G087100 SORBI_3001G090100 SORBI_3001G168400 SORBI_3001G193000 SORBI_3001G196800 SORBI_3001G404700 SORBI_3001G410100 SORBI_3001G429300 SORBI_3001G467000 SORBI_3002G029300 SORBI_3002G191000 SORBI_3002G275100 SORBI_3002G283300 SORBI_3002G299600 SORBI_3002G377300 SORBI_3002G393200 SORBI_3002G398500 SORBI_3003G021200 SORBI_3003G027500 SOR…	SM2
0.000258407	39	411	2.268727717	Dephosphorylation	http://amigo.geneontology.org/amigo/term/GO:0016311	SORBI_3001G043800 SORBI_3001G049300 SORBI_3001G154900 SORBI_3001G289100 SORBI_3001G347700 SORBI_3001G358800 SORBI_3001G403300 SORBI_3001G481900 SORBI_3002G076500 SORBI_3002G165140 SORBI_3002G172000 SORBI_3002G362800 SORBI_3002G427300 SORBI_3003G198200 SORBI_3003G200200 SORBI_3003G209200 SORBI_3003G229300 SORBI_3003G363500 SORBI_3003G412400 SORBI_3004G074900 SORBI_3004G096300 SORBI_3004G325900 SOR…	SM2
0.000317607	41	447	2.192986334	Developmental proc. involved in reproduction	http://amigo.geneontology.org/amigo/term/GO:0003006	SORBI_3001G039900 SORBI_3001G078200 SORBI_3001G079700 SORBI_3001G145000 SORBI_3001G199000 SORBI_3001G234200 SORBI_3001G284400 SORBI_3001G360900 SORBI_3001G410100 SORBI_3001G434900 SORBI_3001G477900 SORBI_3002G009800 SORBI_3002G067800 SORBI_3002G343600 SORBI_3003G127500 SORBI_3003G158700 SORBI_3003G277900 SORBI_3003G298100 SORBI_3003G332500 SORBI_3003G344600 SORBI_3003G398400 SORBI_3003G407300 SOR…	SM2
1.67E-05	69	802	2.057000107	Protein modification by small protein conjugation or removal	http://amigo.geneontology.org/amigo/term/GO:0070647	SORBI_3001G035200 SORBI_3001G136900 SORBI_3001G138300 SORBI_3001G141600 SORBI_3001G168800 SORBI_3001G207500 SORBI_3001G293600 SORBI_3001G428100 SORBI_3001G463100 SORBI_3001G476600 SORBI_3001G487200 SORBI_3001G503500 SORBI_3001G526300 SORBI_3001G539500 SORBI_3002G192101 SORBI_3002G245800 SORBI_3002G256300 SORBI_3002G303600 SORBI_3002G330800 SORBI_3002G376000 SORBI_3002G405500 SORBI_3003G053900 SOR…	SM2
4.64E-06	102	1321	1.846107327	Developmental proc.	http://amigo.geneontology.org/amigo/term/GO:0032502	SORBI_3001G039900 SORBI_3001G075300 SORBI_3001G078200 SORBI_3001G079700 SORBI_3001G145000 SORBI_3001G160200 SORBI_3001G199000 SORBI_3001G234200 SORBI_3001G257300 SORBI_3001G284400 SORBI_3001G358800 SORBI_3001G360900 SORBI_3001G410100 SORBI_3001G434900 SORBI_3001G440800 SORBI_3001G477900 SORBI_3001G487200 SORBI_3001G540400 SORBI_3002G009800 SORBI_3002G067800 SORBI_3002G076500 SORBI_3002G268800 SOR…	SM2
0.000135128	73	948	1.841086165	Multicellular organism development	http://amigo.geneontology.org/amigo/term/GO:0007275	SORBI_3001G039900 SORBI_3001G078200 SORBI_3001G079700 SORBI_3001G145000 SORBI_3001G160200 SORBI_3001G199000 SORBI_3001G234200 SORBI_3001G284400 SORBI_3001G360900 SORBI_3001G410100 SORBI_3001G434900 SORBI_3001G440800 SORBI_3001G477900 SORBI_3001G540400 SORBI_3002G009800 SORBI_3002G067800 SORBI_3002G268800 SORBI_3002G273300 SORBI_3002G320600 SORBI_3002G343600 SORBI_3003G034400 SORBI_3003G058500 SOR…	SM2
4.47E-05	83	1079	1.839146138	Anatomical structure development	http://amigo.geneontology.org/amigo/term/GO:0048856	SORBI_3001G039900 SORBI_3001G078200 SORBI_3001G079700 SORBI_3001G145000 SORBI_3001G160200 SORBI_3001G199000 SORBI_3001G234200 SORBI_3001G257300 SORBI_3001G284400 SORBI_3001G358800 SORBI_3001G360900 SORBI_3001G410100 SORBI_3001G434900 SORBI_3001G440800 SORBI_3001G477900 SORBI_3001G540400 SORBI_3002G009800 SORBI_3002G067800 SORBI_3002G076500 SORBI_3002G268800 SORBI_3002G273300 SORBI_3002G320600 SOR…	SM2
0.000225063	81	1123	1.724506574	Multicellular organismal proc.	http://amigo.geneontology.org/amigo/term/GO:0032501	SORBI_3001G039900 SORBI_3001G078200 SORBI_3001G079700 SORBI_3001G145000 SORBI_3001G160200 SORBI_3001G199000 SORBI_3001G234200 SORBI_3001G284400 SORBI_3001G358800 SORBI_3001G360900 SORBI_3001G410100 SORBI_3001G434900 SORBI_3001G440800 SORBI_3001G477900 SORBI_3001G487200 SORBI_3001G511200 SORBI_3001G540400 SORBI_3002G009800 SORBI_3002G067800 SORBI_3002G268800 SORBI_3002G273300 SORBI_3002G320600 SOR…	SM2
0.000135128	94	1327	1.69362214	Signal transduction	http://amigo.geneontology.org/amigo/term/GO:0007165	SORBI_3001G019400 SORBI_3001G030400 SORBI_3001G042200 SORBI_3001G045000 SORBI_3001G056100 SORBI_3001G063600 SORBI_3001G079700 SORBI_3001G087100 SORBI_3001G090100 SORBI_3001G121200 SORBI_3001G154900 SORBI_3001G160200 SORBI_3001G168400 SORBI_3001G193000 SORBI_3001G196800 SORBI_3001G217300 SORBI_3001G257100 SORBI_3001G289100 SORBI_3001G290200 SORBI_3001G321900 SORBI_3001G403300 SORBI_3001G404700 SOR…	SM2
0.000136705	94	1342	1.674691938	Signaling	http://amigo.geneontology.org/amigo/term/GO:0023052	SORBI_3001G019400 SORBI_3001G030400 SORBI_3001G042200 SORBI_3001G045000 SORBI_3001G056100 SORBI_3001G063600 SORBI_3001G079700 SORBI_3001G087100 SORBI_3001G090100 SORBI_3001G121200 SORBI_3001G154900 SORBI_3001G160200 SORBI_3001G168400 SORBI_3001G193000 SORBI_3001G196800 SORBI_3001G217300 SORBI_3001G257100 SORBI_3001G289100 SORBI_3001G290200 SORBI_3001G321900 SORBI_3001G403300 SORBI_3001G404700 SOR…	SM2
0.000136705	97	1398	1.658915078	Organelle organization	http://amigo.geneontology.org/amigo/term/GO:0006996	SORBI_3001G041400 SORBI_3001G042200 SORBI_3001G078400 SORBI_3001G098900 SORBI_3001G133900 SORBI_3001G146000 SORBI_3001G199000 SORBI_3001G206100 SORBI_3001G234200 SORBI_3001G282500 SORBI_3001G284400 SORBI_3001G287800 SORBI_3001G333500 SORBI_3001G361800 SORBI_3001G399100 SORBI_3001G420700 SORBI_3001G426100 SORBI_3001G477900 SORBI_3001G481900 SORBI_3001G490500 SORBI_3001G511200 SORBI_3002G184900 SOR…	SM2
0.000317714	91	1330	1.635872091	Response to chemical	http://amigo.geneontology.org/amigo/term/GO:0042221	SORBI_3001G030400 SORBI_3001G045000 SORBI_3001G049300 SORBI_3001G056100 SORBI_3001G063600 SORBI_3001G077400 SORBI_3001G078200 SORBI_3001G138300 SORBI_3001G154900 SORBI_3001G160200 SORBI_3001G168400 SORBI_3001G198000 SORBI_3001G214300 SORBI_3001G217300 SORBI_3001G257100 SORBI_3001G282500 SORBI_3001G289100 SORBI_3001G293100 SORBI_3001G317000 SORBI_3001G317200 SORBI_3001G360900 SORBI_3001G403300 SOR…	SM2
0.008506256	5	26	13.44498739	Oxylipin biosynthetic proc.	http://amigo.geneontology.org/amigo/term/GO:0031408	SORBI_3001G125700 SORBI_3010G084100 SORBI_3010G084400 SORBI_3010G084600 SORBI_3010G084700	M1M2
0.008506256	5	27	12.94702489	Oxylipin metabolic proc.	http://amigo.geneontology.org/amigo/term/GO:0031407	SORBI_3001G125700 SORBI_3010G084100 SORBI_3010G084400 SORBI_3010G084600 SORBI_3010G084700	M1M2
0.008506256	5	29	12.05412663	Reg. of jasmonic acid mediated signaling pathway	http://amigo.geneontology.org/amigo/term/GO:2000022	SORBI_3001G259400 SORBI_3001G259600 SORBI_3001G259700 SORBI_3001G259900 SORBI_3001G482700	M1M2
0.008506256	6	45	9.321857923	Toxin catabolic proc.	http://amigo.geneontology.org/amigo/term/GO:0009407	SORBI_3001G317600 SORBI_3001G317700 SORBI_3001G318000 SORBI_3001G318800 SORBI_3001G318900 SORBI_3001G319100	M1M2
0.008506256	6	49	8.56088993	Toxin metabolic proc.	http://amigo.geneontology.org/amigo/term/GO:0009404	SORBI_3001G317600 SORBI_3001G317700 SORBI_3001G318000 SORBI_3001G318800 SORBI_3001G318900 SORBI_3001G319100	M1M2
0.024750726	7	89	5.498848775	Response to wounding	http://amigo.geneontology.org/amigo/term/GO:0009611	SORBI_3001G259400 SORBI_3001G259600 SORBI_3001G259700 SORBI_3001G259900 SORBI_3001G482700 SORBI_3003G225900 SORBI_3004G065900	M1M2
0.008506256	9	122	5.157585327	Glutathione metabolic proc.	http://amigo.geneontology.org/amigo/term/GO:0006749	SORBI_3001G317600 SORBI_3001G317700 SORBI_3001G318000 SORBI_3001G318800 SORBI_3001G318900 SORBI_3001G319000 SORBI_3001G319100 SORBI_3001G412700 SORBI_3001G412800	M1M2
0.008506256	10	152	4.599600949	Reg. of signal transduction	http://amigo.geneontology.org/amigo/term/GO:0009966	SORBI_3001G259400 SORBI_3001G259600 SORBI_3001G259700 SORBI_3001G259900 SORBI_3001G385400 SORBI_3001G482700 SORBI_3001G524100 SORBI_3002G282500 SORBI_3004G065900 SORBI_3009G126300	M1M2
0.008506256	10	153	4.569538198	Reg. of signaling	http://amigo.geneontology.org/amigo/term/GO:0023051	SORBI_3001G259400 SORBI_3001G259600 SORBI_3001G259700 SORBI_3001G259900 SORBI_3001G385400 SORBI_3001G482700 SORBI_3001G524100 SORBI_3002G282500 SORBI_3004G065900 SORBI_3009G126300	M1M2
0.009234205	10	156	4.481662463	Reg. of cell communication	http://amigo.geneontology.org/amigo/term/GO:0010646	SORBI_3001G259400 SORBI_3001G259600 SORBI_3001G259700 SORBI_3001G259900 SORBI_3001G385400 SORBI_3001G482700 SORBI_3001G524100 SORBI_3002G282500 SORBI_3004G065900 SORBI_3009G126300	M1M2
0.012332193	10	163	4.289198431	Cellular modified amino acid metabolic proc.	http://amigo.geneontology.org/amigo/term/GO:0006575	SORBI_3001G317600 SORBI_3001G317700 SORBI_3001G318000 SORBI_3001G318800 SORBI_3001G318900 SORBI_3001G319000 SORBI_3001G319100 SORBI_3001G412700 SORBI_3001G412800 SORBI_3010G249200	M1M2
0.025366658	9	155	4.059518773	Response to salt stress	http://amigo.geneontology.org/amigo/term/GO:0009651	SORBI_3001G127100 SORBI_3001G391500 SORBI_3003G081900 SORBI_3003G082000 SORBI_3003G082100 SORBI_3003G082200 SORBI_3003G137400 SORBI_3003G225900 SORBI_3004G065900	M1M2
0.008506256	15	311	3.372054715	Reg. of response to stimulus	http://amigo.geneontology.org/amigo/term/GO:0048583	SORBI_3001G039900 SORBI_3001G079700 SORBI_3001G259400 SORBI_3001G259600 SORBI_3001G259700 SORBI_3001G259900 SORBI_3001G385400 SORBI_3001G391500 SORBI_3001G482700 SORBI_3001G524100 SORBI_3002G282500 SORBI_3002G338100 SORBI_3003G225900 SORBI_3004G065900 SORBI_3009G126300	M1M2
0.025366658	14	334	2.930524198	Cellular homeostasis	http://amigo.geneontology.org/amigo/term/GO:0019725	SORBI_3001G110300 SORBI_3003G017500 SORBI_3003G206600 SORBI_3003G262200 SORBI_3003G411600 SORBI_3004G000400 SORBI_3004G231400 SORBI_3004G236500 SORBI_3006G164200 SORBI_3006G164300 SORBI_3006G245100 SORBI_3006G257700 SORBI_3006G265900 SORBI_3007G162300	M1M2
0.025366658	15	374	2.804034803	Hormone-mediated signaling pathway	http://amigo.geneontology.org/amigo/term/GO:0009755	SORBI_3001G160200 SORBI_3001G161601 SORBI_3001G217300 SORBI_3001G259400 SORBI_3001G259600 SORBI_3001G259700 SORBI_3001G259900 SORBI_3001G385400 SORBI_3001G482700 SORBI_3001G524100 SORBI_3002G282500 SORBI_3004G065900 SORBI_3008G113700 SORBI_3009G126300 SORBI_3010G229000	M1M2
0.025366658	19	549	2.419607931	Response to oxygen-containing compound	http://amigo.geneontology.org/amigo/term/GO:1901700	SORBI_3001G259400 SORBI_3001G259600 SORBI_3001G259700 SORBI_3001G259900 SORBI_3001G391500 SORBI_3001G482700 SORBI_3001G524100 SORBI_3002G282500 SORBI_3002G338100 SORBI_3003G056600 SORBI_3003G081900 SORBI_3003G082000 SORBI_3003G082100 SORBI_3003G082200 SORBI_3003G137400 SORBI_3004G065900 SORBI_3004G208000 SORBI_3007G035600 SORBI_3009G126300	M1M2
0.012427603	24	722	2.324008901	Response to abiotic stimulus	http://amigo.geneontology.org/amigo/term/GO:0009628	SORBI_3001G039900 SORBI_3001G079700 SORBI_3001G111366 SORBI_3001G111500 SORBI_3001G127100 SORBI_3001G385400 SORBI_3001G391500 SORBI_3001G425000 SORBI_3002G225300 SORBI_3002G282500 SORBI_3002G338100 SORBI_3003G056600 SORBI_3003G081900 SORBI_3003G082000 SORBI_3003G082100 SORBI_3003G082200 SORBI_3003G137400 SORBI_3003G222900 SORBI_3003G225900 SORBI_3004G065900 SORBI_3005G017500 SORBI_3005G145300 SOR…	M1M2
0.005523737	41	1330	2.155241588	Response to chemical	http://amigo.geneontology.org/amigo/term/GO:0042221	SORBI_3001G160200 SORBI_3001G161601 SORBI_3001G217300 SORBI_3001G259400 SORBI_3001G259600 SORBI_3001G259700 SORBI_3001G259900 SORBI_3001G317600 SORBI_3001G317700 SORBI_3001G318000 SORBI_3001G318800 SORBI_3001G318900 SORBI_3001G319100 SORBI_3001G385400 SORBI_3001G391500 SORBI_3001G482700 SORBI_3001G524100 SORBI_3002G282500 SORBI_3002G338100 SORBI_3003G056600 SORBI_3003G081900 SORBI_3003G082000 SOR…	M1M2
0.008506256	38	1327	2.002056901	Signal transduction	http://amigo.geneontology.org/amigo/term/GO:0007165	SORBI_3001G079700 SORBI_3001G088900 SORBI_3001G108400 SORBI_3001G111366 SORBI_3001G111500 SORBI_3001G136600 SORBI_3001G160200 SORBI_3001G161601 SORBI_3001G196800 SORBI_3001G217300 SORBI_3001G259400 SORBI_3001G259600 SORBI_3001G259700 SORBI_3001G259900 SORBI_3001G385400 SORBI_3001G425000 SORBI_3001G432200 SORBI_3001G482700 SORBI_3001G524100 SORBI_3002G216600 SORBI_3002G276400 SORBI_3002G282500 SOR…	M1M2
0.008506256	38	1342	1.979679216	Signaling	http://amigo.geneontology.org/amigo/term/GO:0023052	SORBI_3001G079700 SORBI_3001G088900 SORBI_3001G108400 SORBI_3001G111366 SORBI_3001G111500 SORBI_3001G136600 SORBI_3001G160200 SORBI_3001G161601 SORBI_3001G196800 SORBI_3001G217300 SORBI_3001G259400 SORBI_3001G259600 SORBI_3001G259700 SORBI_3001G259900 SORBI_3001G385400 SORBI_3001G425000 SORBI_3001G432200 SORBI_3001G482700 SORBI_3001G524100 SORBI_3002G216600 SORBI_3002G276400 SORBI_3002G282500 SOR…	M1M2
4.28E-26	123	533	2.978957478	Cellular protein-containing complex assembly	http://amigo.geneontology.org/amigo/term/GO:0034622	SORBI_3001G016900 SORBI_3001G031400 SORBI_3001G054800 SORBI_3001G073600 SORBI_3001G090100 SORBI_3001G133900 SORBI_3001G175300 SORBI_3001G177800 SORBI_3001G178500 SORBI_3001G226000 SORBI_3001G282500 SORBI_3001G283200 SORBI_3001G290700 SORBI_3001G334300 SORBI_3001G340500 SORBI_3001G341500 SORBI_3001G420700 SORBI_3001G423300 SORBI_3001G428400 SORBI_3001G435400 SORBI_3001G439600 SORBI_3001G440900 SOR…	SM1M2
2.16E-21	108	489	2.851026789	Vesicle-mediated transport	http://amigo.geneontology.org/amigo/term/GO:0016192	SORBI_3001G007600 SORBI_3001G012900 SORBI_3001G051200 SORBI_3001G052700 SORBI_3001G067900 SORBI_3001G093300 SORBI_3001G095300 SORBI_3001G098900 SORBI_3001G117800 SORBI_3001G193100 SORBI_3001G251200 SORBI_3001G301200 SORBI_3001G369000 SORBI_3001G381200 SORBI_3001G385400 SORBI_3001G420700 SORBI_3001G461900 SORBI_3001G474400 SORBI_3001G478300 SORBI_3001G490500 SORBI_3001G518400 SORBI_3001G534800 SOR…	SM1M2
1.56E-25	129	585	2.846559368	Protein-containing complex assembly	http://amigo.geneontology.org/amigo/term/GO:0065003	SORBI_3001G016900 SORBI_3001G031400 SORBI_3001G054800 SORBI_3001G073600 SORBI_3001G090100 SORBI_3001G133900 SORBI_3001G175300 SORBI_3001G177800 SORBI_3001G178500 SORBI_3001G226000 SORBI_3001G282500 SORBI_3001G283200 SORBI_3001G290700 SORBI_3001G334300 SORBI_3001G340500 SORBI_3001G341500 SORBI_3001G420700 SORBI_3001G423300 SORBI_3001G428400 SORBI_3001G435400 SORBI_3001G439600 SORBI_3001G440900 SOR…	SM1M2
1.14E-25	130	590	2.844315332	Cellular protein localization	http://amigo.geneontology.org/amigo/term/GO:0034613	SORBI_3001G004400 SORBI_3001G012900 SORBI_3001G017200 SORBI_3001G030300 SORBI_3001G031400 SORBI_3001G052700 SORBI_3001G067900 SORBI_3001G093300 SORBI_3001G098900 SORBI_3001G115500 SORBI_3001G117800 SORBI_3001G148700 SORBI_3001G206100 SORBI_3001G219600 SORBI_3001G228200 SORBI_3001G230900 SORBI_3001G236300 SORBI_3001G356100 SORBI_3001G369000 SORBI_3001G371400 SORBI_3001G381200 SORBI_3001G387800 SOR…	SM1M2
9.31E-22	112	513	2.818298953	Intracellular protein transport	http://amigo.geneontology.org/amigo/term/GO:0006886	SORBI_3001G004400 SORBI_3001G017200 SORBI_3001G030300 SORBI_3001G052700 SORBI_3001G067900 SORBI_3001G093300 SORBI_3001G098900 SORBI_3001G115500 SORBI_3001G117800 SORBI_3001G148700 SORBI_3001G219600 SORBI_3001G228200 SORBI_3001G230900 SORBI_3001G236300 SORBI_3001G369000 SORBI_3001G371400 SORBI_3001G381200 SORBI_3001G387800 SORBI_3001G405900 SORBI_3001G411900 SORBI_3001G420800 SORBI_3001G423300 SOR…	SM1M2
6.44E-28	147	674	2.815424204	Protein-containing complex subunit organization	http://amigo.geneontology.org/amigo/term/GO:0043933	SORBI_3001G016900 SORBI_3001G031400 SORBI_3001G034700 SORBI_3001G043100 SORBI_3001G054800 SORBI_3001G073600 SORBI_3001G090100 SORBI_3001G133900 SORBI_3001G175300 SORBI_3001G177800 SORBI_3001G178500 SORBI_3001G226000 SORBI_3001G236300 SORBI_3001G260400 SORBI_3001G282500 SORBI_3001G283200 SORBI_3001G290700 SORBI_3001G334300 SORBI_3001G340500 SORBI_3001G341500 SORBI_3001G370900 SORBI_3001G420700 SOR…	SM1M2
6.89E-25	130	602	2.787618017	Cellular macromolecule localization	http://amigo.geneontology.org/amigo/term/GO:0070727	SORBI_3001G004400 SORBI_3001G012900 SORBI_3001G017200 SORBI_3001G030300 SORBI_3001G031400 SORBI_3001G052700 SORBI_3001G067900 SORBI_3001G093300 SORBI_3001G098900 SORBI_3001G115500 SORBI_3001G117800 SORBI_3001G148700 SORBI_3001G206100 SORBI_3001G219600 SORBI_3001G228200 SORBI_3001G230900 SORBI_3001G236300 SORBI_3001G356100 SORBI_3001G369000 SORBI_3001G371400 SORBI_3001G381200 SORBI_3001G387800 SOR…	SM1M2
7.08E-28	150	701	2.76222876	Intracellular transport	http://amigo.geneontology.org/amigo/term/GO:0046907	SORBI_3001G004400 SORBI_3001G017200 SORBI_3001G030300 SORBI_3001G043100 SORBI_3001G052700 SORBI_3001G067900 SORBI_3001G078200 SORBI_3001G093300 SORBI_3001G098900 SORBI_3001G115500 SORBI_3001G117800 SORBI_3001G148700 SORBI_3001G212300 SORBI_3001G219600 SORBI_3001G228200 SORBI_3001G230900 SORBI_3001G236300 SORBI_3001G288800 SORBI_3001G369000 SORBI_3001G371400 SORBI_3001G381200 SORBI_3001G387800 SOR…	SM1M2
3.51E-27	149	707	2.720528352	Establishment of protein localization	http://amigo.geneontology.org/amigo/term/GO:0045184	SORBI_3001G004400 SORBI_3001G012900 SORBI_3001G017200 SORBI_3001G030300 SORBI_3001G043100 SORBI_3001G051200 SORBI_3001G052700 SORBI_3001G067900 SORBI_3001G093300 SORBI_3001G098900 SORBI_3001G115500 SORBI_3001G117800 SORBI_3001G148700 SORBI_3001G161300 SORBI_3001G219600 SORBI_3001G228200 SORBI_3001G230900 SORBI_3001G236300 SORBI_3001G288800 SORBI_3001G369000 SORBI_3001G371400 SORBI_3001G381200 SOR…	SM1M2
1.18E-26	147	701	2.706984185	Protein transport	http://amigo.geneontology.org/amigo/term/GO:0015031	SORBI_3001G004400 SORBI_3001G012900 SORBI_3001G017200 SORBI_3001G030300 SORBI_3001G043100 SORBI_3001G051200 SORBI_3001G052700 SORBI_3001G067900 SORBI_3001G093300 SORBI_3001G098900 SORBI_3001G115500 SORBI_3001G117800 SORBI_3001G148700 SORBI_3001G161300 SORBI_3001G219600 SORBI_3001G228200 SORBI_3001G230900 SORBI_3001G236300 SORBI_3001G288800 SORBI_3001G369000 SORBI_3001G371400 SORBI_3001G381200 SOR…	SM1M2
3.51E-27	153	738	2.676217897	Establishment of localization in cell	http://amigo.geneontology.org/amigo/term/GO:0051649	SORBI_3001G004400 SORBI_3001G007600 SORBI_3001G017200 SORBI_3001G030300 SORBI_3001G043100 SORBI_3001G052700 SORBI_3001G067900 SORBI_3001G078200 SORBI_3001G093300 SORBI_3001G098900 SORBI_3001G115500 SORBI_3001G117800 SORBI_3001G148700 SORBI_3001G212300 SORBI_3001G219600 SORBI_3001G228200 SORBI_3001G230900 SORBI_3001G236300 SORBI_3001G288800 SORBI_3001G369000 SORBI_3001G371400 SORBI_3001G381200 SOR…	SM1M2
7.08E-28	160	775	2.66504583	Protein localization	http://amigo.geneontology.org/amigo/term/GO:0008104	SORBI_3001G004400 SORBI_3001G012900 SORBI_3001G017200 SORBI_3001G030300 SORBI_3001G031400 SORBI_3001G043100 SORBI_3001G051200 SORBI_3001G052700 SORBI_3001G067900 SORBI_3001G093300 SORBI_3001G098900 SORBI_3001G115500 SORBI_3001G117800 SORBI_3001G148700 SORBI_3001G161300 SORBI_3001G206100 SORBI_3001G219600 SORBI_3001G228200 SORBI_3001G230900 SORBI_3001G236300 SORBI_3001G288800 SORBI_3001G356100 SOR…	SM1M2
4.60E-30	177	865	2.641457094	Cellular localization	http://amigo.geneontology.org/amigo/term/GO:0051641	SORBI_3001G004400 SORBI_3001G007600 SORBI_3001G012900 SORBI_3001G017200 SORBI_3001G030300 SORBI_3001G031400 SORBI_3001G043100 SORBI_3001G052700 SORBI_3001G067900 SORBI_3001G078200 SORBI_3001G093300 SORBI_3001G098900 SORBI_3001G115500 SORBI_3001G117800 SORBI_3001G148700 SORBI_3001G206100 SORBI_3001G212300 SORBI_3001G219600 SORBI_3001G228200 SORBI_3001G230900 SORBI_3001G236300 SORBI_3001G288800 SOR…	SM1M2
2.08E-24	154	794	2.503724967	Cellular component assembly	http://amigo.geneontology.org/amigo/term/GO:0022607	SORBI_3001G016900 SORBI_3001G031400 SORBI_3001G054800 SORBI_3001G073600 SORBI_3001G086000 SORBI_3001G086200 SORBI_3001G090100 SORBI_3001G133900 SORBI_3001G175300 SORBI_3001G177800 SORBI_3001G178500 SORBI_3001G201400 SORBI_3001G201500 SORBI_3001G226000 SORBI_3001G282500 SORBI_3001G283200 SORBI_3001G290700 SORBI_3001G334300 SORBI_3001G340500 SORBI_3001G341500 SORBI_3001G420700 SORBI_3001G423300 SOR…	SM1M2
5.67E-26	177	949	2.407650565	Macromolecule localization	http://amigo.geneontology.org/amigo/term/GO:0033036	SORBI_3001G004400 SORBI_3001G012900 SORBI_3001G017200 SORBI_3001G023100 SORBI_3001G030300 SORBI_3001G031400 SORBI_3001G043100 SORBI_3001G051200 SORBI_3001G052700 SORBI_3001G067900 SORBI_3001G093300 SORBI_3001G098900 SORBI_3001G115500 SORBI_3001G117800 SORBI_3001G118300 SORBI_3001G120400 SORBI_3001G122000 SORBI_3001G148700 SORBI_3001G161300 SORBI_3001G206100 SORBI_3001G219600 SORBI_3001G228200 SOR…	SM1M2
2.72E-27	222	1295	2.212939841	Cellular component biogenesis	http://amigo.geneontology.org/amigo/term/GO:0044085	SORBI_3001G004400 SORBI_3001G016900 SORBI_3001G031400 SORBI_3001G054800 SORBI_3001G058900 SORBI_3001G073600 SORBI_3001G086000 SORBI_3001G086200 SORBI_3001G090100 SORBI_3001G133900 SORBI_3001G157300 SORBI_3001G173300 SORBI_3001G175300 SORBI_3001G177100 SORBI_3001G177800 SORBI_3001G178500 SORBI_3001G201400 SORBI_3001G201500 SORBI_3001G226000 SORBI_3001G282500 SORBI_3001G283200 SORBI_3001G288800 SOR…	SM1M2
3.03E-20	168	989	2.192801865	Nitrogen compound transport	http://amigo.geneontology.org/amigo/term/GO:0071705	SORBI_3001G004400 SORBI_3001G012900 SORBI_3001G017200 SORBI_3001G030300 SORBI_3001G043100 SORBI_3001G051200 SORBI_3001G052700 SORBI_3001G067900 SORBI_3001G093300 SORBI_3001G098900 SORBI_3001G115500 SORBI_3001G117800 SORBI_3001G118300 SORBI_3001G148700 SORBI_3001G161300 SORBI_3001G219600 SORBI_3001G228200 SORBI_3001G230900 SORBI_3001G236300 SORBI_3001G288800 SORBI_3001G369000 SORBI_3001G371400 SOR…	SM1M2
2.72E-27	234	1398	2.160703064	Organelle organization	http://amigo.geneontology.org/amigo/term/GO:0006996	SORBI_3001G005600 SORBI_3001G007600 SORBI_3001G012900 SORBI_3001G030300 SORBI_3001G031400 SORBI_3001G034700 SORBI_3001G041400 SORBI_3001G042200 SORBI_3001G054800 SORBI_3001G073600 SORBI_3001G078400 SORBI_3001G088100 SORBI_3001G088900 SORBI_3001G093300 SORBI_3001G098900 SORBI_3001G107100 SORBI_3001G107200 SORBI_3001G109300 SORBI_3001G116000 SORBI_3001G133900 SORBI_3001G134400 SORBI_3001G146000 SOR…	SM1M2
1.39E-19	195	1242	2.026746433	Cellular amide metabolic proc.	http://amigo.geneontology.org/amigo/term/GO:0043603	SORBI_3001G011000 SORBI_3001G018900 SORBI_3001G031800 SORBI_3001G036900 SORBI_3001G039400 SORBI_3001G043100 SORBI_3001G046100 SORBI_3001G046300 SORBI_3001G057300 SORBI_3001G058900 SORBI_3001G078400 SORBI_3001G085400 SORBI_3001G127000 SORBI_3001G127100 SORBI_3001G129400 SORBI_3001G148700 SORBI_3001G151100 SORBI_3001G154400 SORBI_3001G175300 SORBI_3001G177800 SORBI_3001G178400 SORBI_3001G178500 SOR…	SM1M2
5.93E-25	268	1768	1.956766187	Organonitrogen compound biosynthetic proc.	http://amigo.geneontology.org/amigo/term/GO:1901566	SORBI_3001G011000 SORBI_3001G018900 SORBI_3001G031800 SORBI_3001G036900 SORBI_3001G039400 SORBI_3001G043100 SORBI_3001G046100 SORBI_3001G046300 SORBI_3001G057300 SORBI_3001G058900 SORBI_3001G084100 SORBI_3001G085400 SORBI_3001G116100 SORBI_3001G129400 SORBI_3001G148900 SORBI_3001G151100 SORBI_3001G154400 SORBI_3001G175300 SORBI_3001G177800 SORBI_3001G178400 SORBI_3001G178500 SORBI_3001G201400 SOR…	SM1M2
