# Supplementary material for: Gene duplication and cellular divergence in crops
Source: Research Square preprint supplement (doi:10.21203/rs.3.rs-1739501/v1), 2022-06-17
Supplement: Supplementary file 3 [file 546409ec36e8fee20f7cf07e.xlsx]

## Sheet: Markers_Maize
	p_val	avg_logFC	pct.1	pct.2	p_val_adj	cluster	gene
Zm00001d049606	0	2.9494	0.732	0.076	0	Phloem	Zm00001d049606
Zm00001d020794	0	2.35393	0.671	0.063	0	Phloem	Zm00001d020794
Zm00001d050168	0	2.21207	0.717	0.078	0	Phloem	Zm00001d050168
Zm00001d023477	0	2.03925	0.695	0.036	0	Phloem	Zm00001d023477
Zm00001d021674	0	2.00241	0.643	0.022	0	Phloem	Zm00001d021674
Zm00001d019069	0	1.99347	0.711	0.024	0	Phloem	Zm00001d019069
Zm00001d016992	0	1.23917	0.674	0.058	0	Phloem	Zm00001d016992
Zm00001d052034	0	1.02625	0.603	0.019	0	Phloem	Zm00001d052034
Zm00001d040466	0	0.944117	0.572	0.036	0	Phloem	Zm00001d040466
Zm00001d012632	0	0.937774	0.511	0.029	0	Phloem	Zm00001d012632
Zm00001d029444	0	0.918988	0.418	0.005	0	Phloem	Zm00001d029444
Zm00001d011879	0	0.817014	0.591	0.028	0	Phloem	Zm00001d011879
Zm00001d042857	0	0.72335	0.591	0.031	0	Phloem	Zm00001d042857
Zm00001d040275	0	0.697252	0.532	0.017	0	Phloem	Zm00001d040275
Zm00001d048799	0	0.690143	0.625	0.028	0	Phloem	Zm00001d048799
Zm00001d045729	0	0.65223	0.4	0.005	0	Phloem	Zm00001d045729
Zm00001d040246	0	0.622203	0.523	0.012	0	Phloem	Zm00001d040246
Zm00001d008645	0	0.541716	0.298	0.003	0	Phloem	Zm00001d008645
Zm00001d052783	0	0.529576	0.357	0.006	0	Phloem	Zm00001d052783
Zm00001d040298	0	0.466432	0.326	0.005	0	Phloem	Zm00001d040298
Zm00001d042420	0	0.465479	0.418	0.009	0	Phloem	Zm00001d042420
Zm00001d046947	0	0.463862	0.523	0.015	0	Phloem	Zm00001d046947
Zm00001d027881	0	0.423372	0.28	0.003	0	Phloem	Zm00001d027881
Zm00001d047211	0	0.400979	0.425	0.013	0	Phloem	Zm00001d047211
Zm00001d036804	0	0.391971	0.385	0.013	0	Phloem	Zm00001d036804
Zm00001d035211	0	0.354386	0.4	0.015	0	Phloem	Zm00001d035211
Zm00001d027681	0	0.332374	0.422	0.014	0	Phloem	Zm00001d027681
Zm00001d029389	0	0.174993	0.289	0.004	0	Phloem	Zm00001d029389
Zm00001d027539	7.79584e-302	1.34286	0.738	0.085	4.39537e-297	Phloem	Zm00001d027539
Zm00001d030009	4.76328e-300	0.823086	0.551	0.041	2.68559e-295	Phloem	Zm00001d030009
Zm00001d030345	1.30911e-297	1.06411	0.529	0.036	7.38092e-293	Phloem	Zm00001d030345
Zm00001d011740	1.10218e-292	0.196134	0.298	0.006	6.21418e-288	Phloem	Zm00001d011740
Zm00001d004480	1.22577e-291	0.180069	0.249	0.003	6.91101e-287	Phloem	Zm00001d004480
Zm00001d037297	1.79938e-260	0.22364	0.317	0.011	1.01451e-255	Phloem	Zm00001d037297
Zm00001d020425	5.78791e-260	1.27827	0.726	0.104	3.26328e-255	Phloem	Zm00001d020425
Zm00001d038608	2.66588e-258	0.59102	0.44	0.029	1.50305e-253	Phloem	Zm00001d038608
Zm00001d034560	4.83503e-254	0.686457	0.615	0.069	2.72604e-249	Phloem	Zm00001d034560
Zm00001d047837	1.30019e-252	0.230148	0.323	0.012	7.33062e-248	Phloem	Zm00001d047837
Zm00001d020345	2.34614e-248	0.393116	0.474	0.036	1.32278e-243	Phloem	Zm00001d020345
Zm00001d008721	1.43616e-244	0.197574	0.289	0.009	8.09722e-240	Phloem	Zm00001d008721
Zm00001d035474	2.3472e-233	0.293286	0.317	0.013	1.32338e-228	Phloem	Zm00001d035474
Zm00001d038177	3.82022e-233	0.269521	0.265	0.008	2.15388e-228	Phloem	Zm00001d038177
Zm00001d050908	4.39702e-224	0.258489	0.323	0.015	2.47908e-219	Phloem	Zm00001d050908
Zm00001d024854	1.57532e-221	0.310997	0.388	0.025	8.88184e-217	Phloem	Zm00001d024854
Zm00001d004874	2.5747e-217	0.218813	0.2	0.003	1.45164e-212	Phloem	Zm00001d004874
Zm00001d024105	7.48647e-216	0.594605	0.498	0.051	4.22094e-211	Phloem	Zm00001d024105
Zm00001d020257	1.5212e-214	0.815643	0.582	0.073	8.57668e-210	Phloem	Zm00001d020257
Zm00001d051611	2.02097e-203	0.789282	0.431	0.038	1.13945e-198	Phloem	Zm00001d051611
Zm00001d053404	1.01581e-202	0.559449	0.594	0.079	5.72721e-198	Phloem	Zm00001d053404
Zm00001d019527	6.03628e-201	0.461869	0.391	0.03	3.40332e-196	Phloem	Zm00001d019527
Zm00001d050811	1.40185e-199	0.426172	0.317	0.018	7.90378e-195	Phloem	Zm00001d050811
Zm00001d008817	1.00684e-197	0.271981	0.366	0.026	5.67666e-193	Phloem	Zm00001d008817
Zm00001d032410	1.13248e-195	0.82379	0.554	0.074	6.38502e-191	Phloem	Zm00001d032410
Zm00001d015407	1.88301e-187	0.149917	0.222	0.007	1.06166e-182	Phloem	Zm00001d015407
Zm00001d009373	1.09758e-184	1.24933	0.831	0.205	6.18825e-180	Phloem	Zm00001d009373
Zm00001d044930	2.23108e-184	1.7141	0.634	0.115	1.2579e-179	Phloem	Zm00001d044930
Zm00001d010693	6.34628e-184	0.496427	0.44	0.045	3.5781e-179	Phloem	Zm00001d010693
Zm00001d042958	2.10999e-182	0.158607	0.209	0.006	1.18963e-177	Phloem	Zm00001d042958
Zm00001d027405	4.26527e-178	0.665191	0.477	0.054	2.4048e-173	Phloem	Zm00001d027405
Zm00001d010755	1.81415e-177	0.741002	0.702	0.131	1.02284e-172	Phloem	Zm00001d010755
Zm00001d014793	4.40864e-177	0.138229	0.209	0.007	2.48563e-172	Phloem	Zm00001d014793
Zm00001d042481	2.07096e-170	0.139713	0.169	0.003	1.16763e-165	Phloem	Zm00001d042481
Zm00001d005733	7.56862e-170	0.518743	0.566	0.088	4.26726e-165	Phloem	Zm00001d005733
Zm00001d048311	4.524e-168	0.272774	0.212	0.008	2.55067e-163	Phloem	Zm00001d048311
Zm00001d006882	3.38998e-163	0.194642	0.255	0.014	1.91131e-158	Phloem	Zm00001d006882
Zm00001d014911	1.29051e-157	0.410733	0.498	0.069	7.27603e-153	Phloem	Zm00001d014911
Zm00001d012814	3.66058e-156	0.10096	0.185	0.006	2.06387e-151	Phloem	Zm00001d012814
Zm00001d043144	5.33594e-153	0.502972	0.332	0.03	3.00845e-148	Phloem	Zm00001d043144
Zm00001d048968	6.65649e-153	0.145702	0.246	0.014	3.753e-148	Phloem	Zm00001d048968
Zm00001d032148	4.41395e-152	0.108417	0.182	0.006	2.48863e-147	Phloem	Zm00001d032148
Zm00001d027500	6.66531e-152	2.36034	0.865	0.351	3.75797e-147	Phloem	Zm00001d027500
Zm00001d015917	2.69328e-150	0.497952	0.462	0.064	1.5185e-145	Phloem	Zm00001d015917
Zm00001d043234	7.15663e-150	0.930667	0.6	0.119	4.03498e-145	Phloem	Zm00001d043234
Zm00001d027292	3.51461e-149	0.139087	0.188	0.007	1.98157e-144	Phloem	Zm00001d027292
Zm00001d044460	3.01392e-147	0.205554	0.258	0.017	1.69928e-142	Phloem	Zm00001d044460
Zm00001d037892	9.39881e-143	0.162504	0.237	0.014	5.29914e-138	Phloem	Zm00001d037892
Zm00001d049120	1.08469e-141	0.113076	0.148	0.003	6.11561e-137	Phloem	Zm00001d049120
Zm00001d040171	2.06343e-136	0.498683	0.172	0.006	1.16338e-131	Phloem	Zm00001d040171
Zm00001d052335	5.01854e-135	1.0972	0.628	0.141	2.8295e-130	Phloem	Zm00001d052335
Zm00001d037173	2.71953e-132	1.52533	0.677	0.203	1.5333e-127	Phloem	Zm00001d037173
Zm00001d004526	1.30815e-131	0.119936	0.178	0.007	7.37546e-127	Phloem	Zm00001d004526
Zm00001d005118	1.8786e-129	0.435722	0.437	0.066	1.05917e-124	Phloem	Zm00001d005118
Zm00001d007157	9.96705e-128	0.393813	0.317	0.033	5.61952e-123	Phloem	Zm00001d007157
Zm00001d029937	1.96595e-127	0.199467	0.335	0.037	1.10842e-122	Phloem	Zm00001d029937
Zm00001d012659	8.96219e-124	0.169435	0.262	0.022	5.05297e-119	Phloem	Zm00001d012659
Zm00001d047860	5.449e-121	0.162871	0.265	0.023	3.0722e-116	Phloem	Zm00001d047860
Zm00001d018211	3.50377e-118	0.544004	0.492	0.092	1.97546e-113	Phloem	Zm00001d018211
Zm00001d005895	5.01322e-118	0.753046	0.622	0.162	2.8265e-113	Phloem	Zm00001d005895
Zm00001d010740	7.94955e-118	0.294239	0.366	0.049	4.48204e-113	Phloem	Zm00001d010740
Zm00001d042463	1.71924e-116	0.175904	0.289	0.029	9.69325e-112	Phloem	Zm00001d042463
Zm00001d024281	1.55705e-115	1.06414	0.874	0.325	8.77879e-111	Phloem	Zm00001d024281
Zm00001d035916	4.09861e-114	0.126479	0.129	0.004	2.31084e-109	Phloem	Zm00001d035916
Zm00001d037343	5.91558e-114	0.848935	0.545	0.125	3.33526e-109	Phloem	Zm00001d037343
Zm00001d017495	5.987e-112	0.410262	0.246	0.022	3.37553e-107	Phloem	Zm00001d017495
Zm00001d039606	8.24064e-112	0.11652	0.16	0.007	4.64615e-107	Phloem	Zm00001d039606
Zm00001d031655	3.46457e-110	0.451694	0.529	0.107	1.95336e-105	Phloem	Zm00001d031655
Zm00001d038558	3.60911e-104	0.861308	0.582	0.151	2.03485e-99	Phloem	Zm00001d038558
Zm00001d043737	1.97546e-100	0.670468	0.157	0.008	1.11378e-95	Phloem	Zm00001d043737
Zm00001d003346	2.25598e-97	0.698217	0.662	0.217	1.27195e-92	Phloem	Zm00001d003346
Zm00001d038065	3.59749e-96	0.635705	0.615	0.163	2.0283e-91	Phloem	Zm00001d038065
Zm00001d016493	9.58409e-95	0.357848	0.443	0.091	5.4036e-90	Phloem	Zm00001d016493
Zm00001d012128	1.32028e-91	0.102427	0.175	0.013	7.44387e-87	Phloem	Zm00001d012128
Zm00001d034546	5.5516e-91	0.515189	0.434	0.088	3.13005e-86	Phloem	Zm00001d034546
Zm00001d040110	1.67741e-90	0.219461	0.378	0.068	9.45741e-86	Phloem	Zm00001d040110
Zm00001d009138	8.34953e-90	0.819017	0.828	0.381	4.70755e-85	Phloem	Zm00001d009138
Zm00001d006720	9.28749e-89	0.118453	0.209	0.02	5.23638e-84	Phloem	Zm00001d006720
Zm00001d052336	1.06787e-87	0.453459	0.302	0.045	6.02073e-83	Phloem	Zm00001d052336
Zm00001d025771	2.70929e-87	0.509278	0.578	0.169	1.52752e-82	Phloem	Zm00001d025771
Zm00001d034651	5.26818e-87	0.148949	0.231	0.025	2.97025e-82	Phloem	Zm00001d034651
Zm00001d016470	1.75428e-86	0.501818	0.514	0.132	9.89079e-82	Phloem	Zm00001d016470
Zm00001d052172	4.52512e-86	0.123397	0.185	0.015	2.55131e-81	Phloem	Zm00001d052172
Zm00001d034062	6.96177e-84	0.434531	0.563	0.16	3.92511e-79	Phloem	Zm00001d034062
Zm00001d010451	7.84789e-83	0.347996	0.388	0.077	4.42472e-78	Phloem	Zm00001d010451
Zm00001d028089	6.26925e-82	0.117723	0.234	0.028	3.53467e-77	Phloem	Zm00001d028089
Zm00001d045728	1.58653e-81	0.104196	0.2	0.019	8.94501e-77	Phloem	Zm00001d045728
Zm00001d004972	8.18365e-81	0.395586	0.378	0.076	4.61402e-76	Phloem	Zm00001d004972
Zm00001d043346	1.71475e-79	0.331711	0.191	0.019	9.66794e-75	Phloem	Zm00001d043346
Zm00001d008646	5.1267e-79	0.656495	0.622	0.232	2.89048e-74	Phloem	Zm00001d008646
Zm00001d052766	1.37106e-77	0.214668	0.262	0.037	7.73016e-73	Phloem	Zm00001d052766
Zm00001d021971	2.08968e-76	1.00467	0.726	0.367	1.17818e-71	Phloem	Zm00001d021971
Zm00001d008397	4.70747e-76	0.140353	0.222	0.027	2.65412e-71	Phloem	Zm00001d008397
Zm00001d021705	7.1685e-76	0.307709	0.517	0.139	4.04167e-71	Phloem	Zm00001d021705
Zm00001d038066	1.9093e-75	0.333557	0.452	0.109	1.07648e-70	Phloem	Zm00001d038066
Zm00001d017014	5.86441e-74	0.144051	0.129	0.008	3.30641e-69	Phloem	Zm00001d017014
Zm00001d005097	6.34612e-74	0.141204	0.188	0.02	3.57801e-69	Phloem	Zm00001d005097
Zm00001d002141	3.56042e-73	0.736424	0.905	0.741	2.0074e-68	Phloem	Zm00001d002141
Zm00001d043089	2.57303e-72	0.206429	0.388	0.085	1.4507e-67	Phloem	Zm00001d043089
Zm00001d023651	6.26758e-72	0.190154	0.218	0.027	3.53373e-67	Phloem	Zm00001d023651
Zm00001d033038	1.20132e-71	0.149396	0.228	0.03	6.77315e-67	Phloem	Zm00001d033038
Zm00001d045564	2.04974e-71	0.823245	0.683	0.316	1.15567e-66	Phloem	Zm00001d045564
Zm00001d015686	9.69065e-71	0.162011	0.252	0.038	5.46369e-66	Phloem	Zm00001d015686
Zm00001d010171	2.95524e-70	1.47735	0.788	0.601	1.66619e-65	Phloem	Zm00001d010171
Zm00001d017461	2.01554e-69	0.306918	0.372	0.082	1.13638e-64	Phloem	Zm00001d017461
Zm00001d022264	8.92983e-69	1.45237	0.818	0.621	5.03473e-64	Phloem	Zm00001d022264
Zm00001d033747	5.87949e-68	0.243629	0.342	0.07	3.31491e-63	Phloem	Zm00001d033747
Zm00001d042386	8.28789e-68	0.435607	0.686	0.246	4.67279e-63	Phloem	Zm00001d042386
Zm00001d027461	3.94156e-67	0.335139	0.498	0.151	2.22229e-62	Phloem	Zm00001d027461
Zm00001d039031	1.37557e-66	0.102186	0.2	0.025	7.75558e-62	Phloem	Zm00001d039031
Zm00001d025375	1.77578e-66	0.291033	0.44	0.119	1.0012e-61	Phloem	Zm00001d025375
Zm00001d042225	2.35054e-66	0.355415	0.415	0.102	1.32526e-61	Phloem	Zm00001d042225
Zm00001d003262	3.86094e-66	0.131922	0.194	0.023	2.17684e-61	Phloem	Zm00001d003262
Zm00001d043047	8.82954e-66	0.686348	0.532	0.174	4.97818e-61	Phloem	Zm00001d043047
Zm00001d017958	1.49558e-65	-0.948266	0.437	0.829	8.43221e-61	Phloem	Zm00001d017958
Zm00001d052776	2.09189e-65	0.267683	0.388	0.093	1.17943e-60	Phloem	Zm00001d052776
Zm00001d047849	1.22043e-64	0.337384	0.606	0.216	6.88091e-60	Phloem	Zm00001d047849
Zm00001d043621	2.93333e-64	0.652216	0.458	0.138	1.65384e-59	Phloem	Zm00001d043621
Zm00001d018356	6.92207e-64	0.667419	0.591	0.214	3.90273e-59	Phloem	Zm00001d018356
Zm00001d016568	1.92882e-63	0.872695	0.837	0.626	1.08749e-58	Phloem	Zm00001d016568
Zm00001d029495	2.67982e-63	0.351056	0.428	0.115	1.51091e-58	Phloem	Zm00001d029495
Zm00001d049228	8.4362e-63	0.276348	0.378	0.092	4.75642e-58	Phloem	Zm00001d049228
Zm00001d036678	1.42862e-62	0.110866	0.142	0.013	8.0547e-58	Phloem	Zm00001d036678
Zm00001d016567	1.84162e-62	0.913776	0.683	0.356	1.03832e-57	Phloem	Zm00001d016567
Zm00001d048136	2.77161e-62	0.372404	0.366	0.085	1.56266e-57	Phloem	Zm00001d048136
Zm00001d044226	7.88464e-62	0.233011	0.394	0.1	4.44544e-57	Phloem	Zm00001d044226
Zm00001d053897	8.09183e-62	0.74359	0.425	0.12	4.56225e-57	Phloem	Zm00001d053897
Zm00001d031168	2.03184e-61	-0.696858	1	1	1.14557e-56	Phloem	Zm00001d031168
Zm00001d010211	2.07624e-61	0.413072	0.609	0.236	1.1706e-56	Phloem	Zm00001d010211
Zm00001d044133	2.20292e-61	0.340203	0.557	0.171	1.24203e-56	Phloem	Zm00001d044133
Zm00001d019303	4.9545e-61	0.21261	0.357	0.086	2.7934e-56	Phloem	Zm00001d019303
Zm00001d047680	2.0073e-60	0.142517	0.218	0.032	1.13174e-55	Phloem	Zm00001d047680
Zm00001d021938	2.35597e-60	0.567051	0.406	0.109	1.32832e-55	Phloem	Zm00001d021938
Zm00001d036835	6.82668e-60	0.774878	0.538	0.191	3.84895e-55	Phloem	Zm00001d036835
Zm00001d027427	2.26514e-59	0.7312	0.815	0.657	1.27711e-54	Phloem	Zm00001d027427
Zm00001d043523	5.73651e-59	1.0761	0.692	0.334	3.2343e-54	Phloem	Zm00001d043523
Zm00001d014887	6.43552e-59	-0.805937	0.64	0.882	3.62841e-54	Phloem	Zm00001d014887
Zm00001d027330	8.60859e-59	0.618269	0.357	0.085	4.85361e-54	Phloem	Zm00001d027330
Zm00001d021965	1.40038e-58	0.252718	0.332	0.076	7.8955e-54	Phloem	Zm00001d021965
Zm00001d017682	1.80802e-58	0.355519	0.526	0.183	1.01938e-53	Phloem	Zm00001d017682
Zm00001d047350	1.17161e-57	0.100958	0.218	0.034	6.60565e-53	Phloem	Zm00001d047350
Zm00001d012953	1.99484e-57	0.119629	0.206	0.031	1.12471e-52	Phloem	Zm00001d012953
Zm00001d044584	2.09102e-57	0.377175	0.505	0.153	1.17894e-52	Phloem	Zm00001d044584
Zm00001d005159	5.93532e-57	0.630847	0.855	0.594	3.34639e-52	Phloem	Zm00001d005159
Zm00001d041927	6.78405e-57	0.128729	0.222	0.036	3.82491e-52	Phloem	Zm00001d041927
Zm00001d034630	2.84912e-56	0.404774	0.652	0.29	1.60636e-51	Phloem	Zm00001d034630
Zm00001d002992	3.67829e-56	0.107531	0.203	0.03	2.07386e-51	Phloem	Zm00001d002992
Zm00001d054016	4.55662e-56	0.169241	0.329	0.074	2.56907e-51	Phloem	Zm00001d054016
Zm00001d009415	3.15593e-55	0.99249	0.674	0.305	1.77934e-50	Phloem	Zm00001d009415
Zm00001d007045	5.28393e-55	0.402003	0.575	0.208	2.97913e-50	Phloem	Zm00001d007045
Zm00001d048843	7.32325e-55	0.306137	0.465	0.144	4.12892e-50	Phloem	Zm00001d048843
Zm00001d007254	1.39838e-54	0.173838	0.292	0.061	7.88423e-50	Phloem	Zm00001d007254
Zm00001d037072	1.61958e-54	0.108406	0.212	0.035	9.13136e-50	Phloem	Zm00001d037072
Zm00001d007884	2.08515e-54	0.715693	0.895	0.78	1.17563e-49	Phloem	Zm00001d007884
Zm00001d007029	2.42455e-54	0.210923	0.317	0.072	1.36699e-49	Phloem	Zm00001d007029
Zm00001d011531	3.47081e-54	0.236079	0.311	0.074	1.95688e-49	Phloem	Zm00001d011531
Zm00001d038885	1.52544e-53	0.607923	0.778	0.564	8.60058e-49	Phloem	Zm00001d038885
Zm00001d042243	2.05931e-53	0.169997	0.212	0.035	1.16106e-48	Phloem	Zm00001d042243
Zm00001d002316	1.54723e-52	0.154575	0.277	0.057	8.72343e-48	Phloem	Zm00001d002316
Zm00001d013571	4.50462e-52	0.290142	0.44	0.141	2.53975e-47	Phloem	Zm00001d013571
Zm00001d052171	5.44193e-52	0.617917	0.674	0.353	3.06821e-47	Phloem	Zm00001d052171
Zm00001d038327	7.26034e-52	0.850016	0.877	0.747	4.09345e-47	Phloem	Zm00001d038327
Zm00001d027938	1.18166e-51	0.123113	0.123	0.012	6.66229e-47	Phloem	Zm00001d027938
Zm00001d008386	1.25834e-51	0.202414	0.317	0.074	7.09463e-47	Phloem	Zm00001d008386
Zm00001d048473	1.67889e-51	0.381129	0.495	0.181	9.46573e-47	Phloem	Zm00001d048473
Zm00001d039221	1.21471e-50	0.621129	0.8	0.566	6.84863e-46	Phloem	Zm00001d039221
Zm00001d016216	1.31329e-50	0.167758	0.295	0.066	7.40443e-46	Phloem	Zm00001d016216
Zm00001d015421	1.48059e-50	0.429533	0.625	0.283	8.34772e-46	Phloem	Zm00001d015421
Zm00001d045576	1.13232e-49	0.132008	0.268	0.058	6.38413e-45	Phloem	Zm00001d045576
Zm00001d052612	1.24911e-49	0.110186	0.243	0.047	7.0426e-45	Phloem	Zm00001d052612
Zm00001d038218	1.64556e-49	0.831075	0.914	0.843	9.27782e-45	Phloem	Zm00001d038218
Zm00001d011242	4.2371e-49	0.531699	0.705	0.412	2.38892e-44	Phloem	Zm00001d011242
Zm00001d053932	4.95499e-49	-0.572659	0.268	0.703	2.79367e-44	Phloem	Zm00001d053932
Zm00001d015131	3.3619e-48	0.176392	0.308	0.073	1.89547e-43	Phloem	Zm00001d015131
Zm00001d034561	1.57257e-47	0.633567	0.689	0.396	8.86633e-43	Phloem	Zm00001d034561
Zm00001d053952	2.65738e-47	0.310041	0.483	0.175	1.49826e-42	Phloem	Zm00001d053952
Zm00001d034497	3.31164e-47	1.06753	0.757	0.512	1.86714e-42	Phloem	Zm00001d034497
Zm00001d036051	3.39498e-47	0.135992	0.182	0.029	1.91412e-42	Phloem	Zm00001d036051
Zm00001d016519	6.1756e-47	0.488249	0.825	0.619	3.48187e-42	Phloem	Zm00001d016519
Zm00001d041414	1.10537e-46	0.107977	0.203	0.036	6.23218e-42	Phloem	Zm00001d041414
Zm00001d027131	1.38288e-46	0.263025	0.446	0.148	7.7968e-42	Phloem	Zm00001d027131
Zm00001d027652	2.52195e-46	-1.49352	0.228	0.59	1.4219e-41	Phloem	Zm00001d027652
Zm00001d027932	3.13109e-46	0.285712	0.412	0.133	1.76534e-41	Phloem	Zm00001d027932
Zm00001d038326	4.63217e-46	0.154222	0.265	0.059	2.61166e-41	Phloem	Zm00001d038326
Zm00001d001913	5.38122e-46	0.57881	0.935	0.901	3.03399e-41	Phloem	Zm00001d001913
Zm00001d042114	5.96307e-46	1.32287	0.729	0.537	3.36204e-41	Phloem	Zm00001d042114
Zm00001d043736	9.7905e-46	0.540669	0.717	0.373	5.51998e-41	Phloem	Zm00001d043736
Zm00001d046155	1.07955e-45	0.231307	0.492	0.174	6.08663e-41	Phloem	Zm00001d046155
Zm00001d043422	1.3023e-45	0.446393	0.394	0.131	7.34248e-41	Phloem	Zm00001d043422
Zm00001d002428	4.57266e-45	0.342091	0.428	0.146	2.57811e-40	Phloem	Zm00001d002428
Zm00001d019320	7.29589e-45	0.37245	0.446	0.16	4.1135e-40	Phloem	Zm00001d019320
Zm00001d031773	1.14911e-44	0.167199	0.16	0.024	6.4788e-40	Phloem	Zm00001d031773
Zm00001d018696	1.16459e-44	0.327243	0.662	0.305	6.5661e-40	Phloem	Zm00001d018696
Zm00001d048731	1.26788e-44	0.24816	0.311	0.081	7.14844e-40	Phloem	Zm00001d048731
Zm00001d052371	1.49321e-44	0.962116	0.582	0.264	8.41888e-40	Phloem	Zm00001d052371
Zm00001d047274	3.10433e-44	0.179979	0.311	0.083	1.75025e-39	Phloem	Zm00001d047274
Zm00001d015856	4.0695e-44	0.483613	0.825	0.614	2.29443e-39	Phloem	Zm00001d015856
Zm00001d047992	4.94801e-44	0.513031	0.754	0.51	2.78974e-39	Phloem	Zm00001d047992
Zm00001d008330	6.05132e-44	0.329219	0.597	0.283	3.4118e-39	Phloem	Zm00001d008330
Zm00001d006010	7.39385e-44	0.949579	0.883	0.762	4.16873e-39	Phloem	Zm00001d006010
Zm00001d023395	1.51578e-43	-1.38644	0.812	0.906	8.54609e-39	Phloem	Zm00001d023395
Zm00001d035616	2.05167e-43	0.867279	0.825	0.701	1.15675e-38	Phloem	Zm00001d035616
Zm00001d019173	5.07332e-43	0.185482	0.391	0.123	2.86039e-38	Phloem	Zm00001d019173
Zm00001d023994	5.63003e-43	-1.17427	0.646	0.823	3.17427e-38	Phloem	Zm00001d023994
Zm00001d020560	1.20412e-42	0.13008	0.271	0.065	6.78897e-38	Phloem	Zm00001d020560
Zm00001d031128	2.52703e-42	-0.532895	0.929	0.954	1.42476e-37	Phloem	Zm00001d031128
Zm00001d002131	3.706e-42	0.193455	0.166	0.027	2.08948e-37	Phloem	Zm00001d002131
Zm00001d032322	7.34135e-42	0.327996	0.538	0.215	4.13912e-37	Phloem	Zm00001d032322
Zm00001d030346	7.59562e-42	1.12705	0.145	0.021	4.28249e-37	Phloem	Zm00001d030346
Zm00001d018201	1.19606e-41	0.110245	0.178	0.031	6.74349e-37	Phloem	Zm00001d018201
Zm00001d023658	5.29359e-41	0.161996	0.323	0.092	2.98458e-36	Phloem	Zm00001d023658
Zm00001d008312	5.75428e-41	0.245941	0.597	0.227	3.24432e-36	Phloem	Zm00001d008312
Zm00001d031892	7.28511e-41	0.36958	0.418	0.151	4.10742e-36	Phloem	Zm00001d031892
Zm00001d035171	1.01729e-40	0.148404	0.154	0.024	5.73556e-36	Phloem	Zm00001d035171
Zm00001d049789	1.04415e-40	0.329442	0.418	0.155	5.88704e-36	Phloem	Zm00001d049789
Zm00001d044939	1.0581e-40	-0.889266	0.72	0.767	5.9657e-36	Phloem	Zm00001d044939
Zm00001d010336	5.53289e-40	0.116995	0.286	0.076	3.1195e-35	Phloem	Zm00001d010336
Zm00001d042963	6.36355e-40	0.150935	0.262	0.065	3.58783e-35	Phloem	Zm00001d042963
Zm00001d013007	7.56109e-40	0.461031	0.914	0.844	4.26302e-35	Phloem	Zm00001d013007
Zm00001d009146	1.68257e-39	-0.756733	0.68	0.82	9.48649e-35	Phloem	Zm00001d009146
Zm00001d042022	1.7595e-39	0.403215	0.591	0.273	9.92023e-35	Phloem	Zm00001d042022
Zm00001d008693	1.9482e-39	0.141364	0.283	0.073	1.09841e-34	Phloem	Zm00001d008693
Zm00001d011718	2.21949e-39	0.48017	0.738	0.526	1.25137e-34	Phloem	Zm00001d011718
Zm00001d029899	2.89015e-39	0.532642	0.871	0.689	1.6295e-34	Phloem	Zm00001d029899
Zm00001d052136	3.77386e-39	0.191058	0.286	0.079	2.12774e-34	Phloem	Zm00001d052136
Zm00001d052379	5.04766e-39	0.239159	0.563	0.242	2.84592e-34	Phloem	Zm00001d052379
Zm00001d052372	5.54702e-39	1.17459	0.615	0.324	3.12746e-34	Phloem	Zm00001d052372
Zm00001d005470	6.90564e-39	0.245006	0.4	0.141	3.89347e-34	Phloem	Zm00001d005470
Zm00001d018399	8.30391e-39	0.227791	0.603	0.265	4.68183e-34	Phloem	Zm00001d018399
Zm00001d053699	9.23837e-39	0.226497	0.24	0.058	5.20868e-34	Phloem	Zm00001d053699
Zm00001d043796	9.3481e-39	0.130398	0.222	0.05	5.27055e-34	Phloem	Zm00001d043796
Zm00001d040504	1.14491e-38	0.125462	0.265	0.068	6.45509e-34	Phloem	Zm00001d040504
Zm00001d018244	1.43657e-38	0.313026	0.308	0.091	8.0995e-34	Phloem	Zm00001d018244
Zm00001d038523	1.44738e-38	0.42383	0.369	0.129	8.16049e-34	Phloem	Zm00001d038523
Zm00001d028524	1.84181e-38	0.277766	0.418	0.157	1.03843e-33	Phloem	Zm00001d028524
Zm00001d030045	2.73496e-38	0.252423	0.418	0.16	1.542e-33	Phloem	Zm00001d030045
Zm00001d024963	3.75096e-38	-0.53972	0.84	0.96	2.11483e-33	Phloem	Zm00001d024963
Zm00001d050404	5.3033e-38	0.255851	0.446	0.166	2.99005e-33	Phloem	Zm00001d050404
Zm00001d031205	5.33291e-38	0.422224	0.591	0.307	3.00675e-33	Phloem	Zm00001d031205
Zm00001d038288	5.73749e-38	0.808927	0.606	0.306	3.23485e-33	Phloem	Zm00001d038288
Zm00001d015715	6.74606e-38	0.356879	0.554	0.239	3.80349e-33	Phloem	Zm00001d015715
Zm00001d006463	9.26875e-38	0.171991	0.332	0.105	5.22581e-33	Phloem	Zm00001d006463
Zm00001d014794	1.1426e-37	0.298799	0.486	0.196	6.44212e-33	Phloem	Zm00001d014794
Zm00001d029950	2.42425e-37	0.101581	0.228	0.052	1.36682e-32	Phloem	Zm00001d029950
Zm00001d026368	2.68026e-37	0.366603	0.594	0.317	1.51115e-32	Phloem	Zm00001d026368
Zm00001d050198	4.85616e-37	0.656948	0.877	0.723	2.73795e-32	Phloem	Zm00001d050198
Zm00001d034356	5.16183e-37	-0.692234	0.44	0.759	2.91029e-32	Phloem	Zm00001d034356
Zm00001d051936	5.55427e-37	0.103669	0.157	0.027	3.13155e-32	Phloem	Zm00001d051936
Zm00001d007057	8.17109e-37	0.133694	0.126	0.018	4.60694e-32	Phloem	Zm00001d007057
Zm00001d051804	9.39386e-37	-0.540226	0.283	0.652	5.29635e-32	Phloem	Zm00001d051804
Zm00001d045042	2.02152e-36	-0.549148	0.412	0.736	1.13975e-31	Phloem	Zm00001d045042
Zm00001d016691	2.86152e-36	0.933435	0.695	0.43	1.61336e-31	Phloem	Zm00001d016691
Zm00001d040188	4.21701e-36	0.14162	0.354	0.113	2.37759e-31	Phloem	Zm00001d040188
Zm00001d012450	4.30469e-36	0.233291	0.372	0.13	2.42703e-31	Phloem	Zm00001d012450
Zm00001d029067	4.95274e-36	0.288945	0.403	0.149	2.7924e-31	Phloem	Zm00001d029067
Zm00001d038728	5.20147e-36	0.10918	0.126	0.018	2.93264e-31	Phloem	Zm00001d038728
Zm00001d015777	5.34754e-36	0.173543	0.311	0.095	3.015e-31	Phloem	Zm00001d015777
Zm00001d018363	5.65146e-36	0.376803	0.585	0.292	3.18635e-31	Phloem	Zm00001d018363
Zm00001d031344	7.66209e-36	0.503216	0.991	0.968	4.31996e-31	Phloem	Zm00001d031344
Zm00001d006910	1.58595e-35	0.362451	0.578	0.271	8.94173e-31	Phloem	Zm00001d006910
Zm00001d016599	3.01902e-35	0.220976	0.428	0.161	1.70215e-30	Phloem	Zm00001d016599
Zm00001d043420	3.9451e-35	0.37477	0.606	0.321	2.22429e-30	Phloem	Zm00001d043420
Zm00001d037079	4.02845e-35	0.166614	0.314	0.1	2.27128e-30	Phloem	Zm00001d037079
Zm00001d013546	4.69312e-35	0.290709	0.588	0.282	2.64603e-30	Phloem	Zm00001d013546
Zm00001d002342	5.57909e-35	0.207162	0.382	0.139	3.14555e-30	Phloem	Zm00001d002342
Zm00001d041173	7.09942e-35	-0.933319	0.446	0.698	4.00272e-30	Phloem	Zm00001d041173
Zm00001d033941	8.01377e-35	0.188093	0.366	0.126	4.51824e-30	Phloem	Zm00001d033941
Zm00001d017274	1.34206e-34	-0.678911	0.557	0.74	7.56667e-30	Phloem	Zm00001d017274
Zm00001d038526	1.61542e-34	0.214895	0.12	0.018	9.10793e-30	Phloem	Zm00001d038526
Zm00001d053425	2.60206e-34	0.315342	0.554	0.277	1.46706e-29	Phloem	Zm00001d053425
Zm00001d036641	2.80202e-34	0.121989	0.388	0.134	1.57981e-29	Phloem	Zm00001d036641
Zm00001d052734	3.6206e-34	0.266303	0.566	0.271	2.04133e-29	Phloem	Zm00001d052734
Zm00001d012701	4.59946e-34	0.12109	0.302	0.091	2.59322e-29	Phloem	Zm00001d012701
Zm00001d020736	5.26204e-34	0.127637	0.292	0.089	2.96679e-29	Phloem	Zm00001d020736
Zm00001d048707	5.41919e-34	0.470291	0.84	0.669	3.0554e-29	Phloem	Zm00001d048707
Zm00001d041609	7.3369e-34	0.325415	0.631	0.361	4.13662e-29	Phloem	Zm00001d041609
Zm00001d020371	9.41561e-34	0.155582	0.326	0.108	5.30862e-29	Phloem	Zm00001d020371
Zm00001d014888	1.16133e-33	0.317127	0.572	0.28	6.54767e-29	Phloem	Zm00001d014888
Zm00001d024839	1.44657e-33	-0.729208	0.738	0.877	8.15593e-29	Phloem	Zm00001d024839
Zm00001d019563	2.33591e-33	-0.850749	0.185	0.512	1.31701e-28	Phloem	Zm00001d019563
Zm00001d028830	2.64893e-33	0.215433	0.418	0.159	1.49349e-28	Phloem	Zm00001d028830
Zm00001d006697	3.21459e-33	0.103362	0.169	0.035	1.81242e-28	Phloem	Zm00001d006697
Zm00001d002275	5.53471e-33	-0.556888	0.289	0.638	3.12052e-28	Phloem	Zm00001d002275
Zm00001d012703	5.74698e-33	0.127571	0.265	0.078	3.2402e-28	Phloem	Zm00001d012703
Zm00001d009224	6.69883e-33	0.412071	0.529	0.252	3.77687e-28	Phloem	Zm00001d009224
Zm00001d011792	6.96203e-33	0.257497	0.569	0.289	3.92526e-28	Phloem	Zm00001d011792
Zm00001d024952	8.04809e-33	-0.538008	0.203	0.551	4.53759e-28	Phloem	Zm00001d024952
Zm00001d016098	1.26267e-32	0.109508	0.277	0.08	7.11903e-28	Phloem	Zm00001d016098
Zm00001d013873	1.31713e-32	0.367913	0.582	0.289	7.42609e-28	Phloem	Zm00001d013873
Zm00001d020260	1.68785e-32	0.3308	0.618	0.32	9.51629e-28	Phloem	Zm00001d020260
Zm00001d042767	5.13338e-32	0.37108	0.603	0.315	2.89425e-27	Phloem	Zm00001d042767
Zm00001d032480	5.42232e-32	0.4951	0.726	0.46	3.05716e-27	Phloem	Zm00001d032480
Zm00001d029539	7.68363e-32	0.244915	0.431	0.176	4.33211e-27	Phloem	Zm00001d029539
Zm00001d011658	7.93571e-32	0.312679	0.569	0.297	4.47423e-27	Phloem	Zm00001d011658
Zm00001d040066	8.44141e-32	0.194682	0.326	0.108	4.75935e-27	Phloem	Zm00001d040066
Zm00001d021668	1.98883e-31	0.627552	0.877	0.808	1.12132e-26	Phloem	Zm00001d021668
Zm00001d034346	2.13577e-31	0.304396	0.588	0.317	1.20417e-26	Phloem	Zm00001d034346
Zm00001d039300	3.59005e-31	0.168929	0.317	0.105	2.0241e-26	Phloem	Zm00001d039300
Zm00001d051403	3.79023e-31	0.188029	0.311	0.103	2.13697e-26	Phloem	Zm00001d051403
Zm00001d034420	3.8124e-31	-0.51866	0.258	0.558	2.14947e-26	Phloem	Zm00001d034420
Zm00001d033423	4.3578e-31	0.446163	0.64	0.385	2.45697e-26	Phloem	Zm00001d033423
Zm00001d011225	6.34393e-31	0.338433	0.523	0.246	3.57677e-26	Phloem	Zm00001d011225
Zm00001d012242	8.8568e-31	0.27038	0.354	0.131	4.99355e-26	Phloem	Zm00001d012242
Zm00001d002396	1.48576e-30	0.314969	0.52	0.236	8.37687e-26	Phloem	Zm00001d002396
Zm00001d028692	3.75126e-30	0.236544	0.311	0.106	2.115e-25	Phloem	Zm00001d028692
Zm00001d019670	3.95602e-30	0.27696	0.68	0.369	2.23044e-25	Phloem	Zm00001d019670
Zm00001d017474	4.29332e-30	0.120623	0.175	0.04	2.42062e-25	Phloem	Zm00001d017474
Zm00001d017008	5.71592e-30	0.265498	0.351	0.132	3.2227e-25	Phloem	Zm00001d017008
Zm00001d013325	6.57109e-30	0.246047	0.545	0.285	3.70484e-25	Phloem	Zm00001d013325
Zm00001d048358	8.48167e-30	0.357528	0.692	0.426	4.78205e-25	Phloem	Zm00001d048358
Zm00001d029849	8.48505e-30	0.197003	0.406	0.161	4.78396e-25	Phloem	Zm00001d029849
Zm00001d024382	9.79848e-30	0.244477	0.357	0.133	5.52448e-25	Phloem	Zm00001d024382
Zm00001d013113	1.11858e-29	0.143318	0.203	0.051	6.30669e-25	Phloem	Zm00001d013113
Zm00001d016274	1.16587e-29	-0.53778	0.311	0.588	6.57327e-25	Phloem	Zm00001d016274
Zm00001d042541	3.13578e-29	-0.764991	0.225	0.547	1.76798e-24	Phloem	Zm00001d042541
Zm00001d009243	3.13735e-29	0.11866	0.369	0.132	1.76887e-24	Phloem	Zm00001d009243
Zm00001d007897	3.924e-29	0.385131	0.84	0.692	2.21239e-24	Phloem	Zm00001d007897
Zm00001d020636	4.25811e-29	-0.547458	0.449	0.671	2.40076e-24	Phloem	Zm00001d020636
Zm00001d007034	4.9688e-29	0.368229	0.548	0.266	2.80146e-24	Phloem	Zm00001d007034
Zm00001d043410	6.56585e-29	-0.501648	0.597	0.72	3.70189e-24	Phloem	Zm00001d043410
Zm00001d043998	7.23399e-29	0.432588	0.849	0.739	4.0786e-24	Phloem	Zm00001d043998
Zm00001d034644	1.0001e-28	0.576378	0.911	0.852	5.63866e-24	Phloem	Zm00001d034644
Zm00001d049362	1.61118e-28	0.392846	0.732	0.534	9.084e-24	Phloem	Zm00001d049362
Zm00001d042096	1.85158e-28	-0.685795	0.597	0.792	1.04394e-23	Phloem	Zm00001d042096
Zm00001d018565	2.57834e-28	0.145826	0.388	0.151	1.45369e-23	Phloem	Zm00001d018565
Zm00001d021948	2.80751e-28	0.325652	0.622	0.353	1.5829e-23	Phloem	Zm00001d021948
Zm00001d030232	3.41822e-28	0.104688	0.126	0.023	1.92723e-23	Phloem	Zm00001d030232
Zm00001d013276	4.15928e-28	0.207404	0.422	0.178	2.34505e-23	Phloem	Zm00001d013276
Zm00001d020606	4.79005e-28	0.216716	0.317	0.117	2.70068e-23	Phloem	Zm00001d020606
Zm00001d051392	5.82085e-28	0.412746	0.772	0.564	3.28186e-23	Phloem	Zm00001d051392
Zm00001d011431	5.8601e-28	0.188773	0.102	0.016	3.30399e-23	Phloem	Zm00001d011431
Zm00001d037018	6.0456e-28	0.196485	0.437	0.195	3.40857e-23	Phloem	Zm00001d037018
Zm00001d029708	1.02216e-27	0.212309	0.369	0.148	5.76301e-23	Phloem	Zm00001d029708
Zm00001d010950	1.45344e-27	-0.461869	0.271	0.559	8.19464e-23	Phloem	Zm00001d010950
Zm00001d048616	1.67215e-27	0.286867	0.572	0.306	9.42773e-23	Phloem	Zm00001d048616
Zm00001d027855	1.68569e-27	-0.584974	0.114	0.424	9.5041e-23	Phloem	Zm00001d027855
Zm00001d011565	2.48771e-27	0.323685	0.886	0.766	1.40259e-22	Phloem	Zm00001d011565
Zm00001d019312	2.50962e-27	-0.929735	0.363	0.633	1.41495e-22	Phloem	Zm00001d019312
Zm00001d037743	2.57973e-27	0.100707	0.197	0.052	1.45448e-22	Phloem	Zm00001d037743
Zm00001d034491	3.45066e-27	0.450027	0.763	0.596	1.94552e-22	Phloem	Zm00001d034491
Zm00001d028450	3.7589e-27	0.37272	0.8	0.645	2.11931e-22	Phloem	Zm00001d028450
Zm00001d018229	3.81652e-27	0.147684	0.151	0.033	2.15179e-22	Phloem	Zm00001d018229
Zm00001d038886	4.01455e-27	0.208285	0.437	0.209	2.26345e-22	Phloem	Zm00001d038886
Zm00001d043402	4.93995e-27	0.131109	0.302	0.108	2.7852e-22	Phloem	Zm00001d043402
Zm00001d052651	5.24095e-27	-1.01076	0.145	0.434	2.9549e-22	Phloem	Zm00001d052651
Zm00001d010920	5.34676e-27	-0.43754	0.637	0.764	3.01456e-22	Phloem	Zm00001d010920
Zm00001d036136	7.98081e-27	0.187833	0.308	0.108	4.49966e-22	Phloem	Zm00001d036136
Zm00001d029393	9.16816e-27	0.366814	0.831	0.724	5.1691e-22	Phloem	Zm00001d029393
Zm00001d022546	9.55891e-27	0.548292	0.769	0.649	5.38941e-22	Phloem	Zm00001d022546
Zm00001d036918	9.61312e-27	0.27417	0.422	0.189	5.41997e-22	Phloem	Zm00001d036918
Zm00001d048795	1.18637e-26	0.29605	0.428	0.191	6.68889e-22	Phloem	Zm00001d048795
Zm00001d038088	1.33503e-26	0.337693	0.812	0.63	7.52702e-22	Phloem	Zm00001d038088
Zm00001d051439	1.53472e-26	0.132261	0.357	0.138	8.65291e-22	Phloem	Zm00001d051439
Zm00001d017575	1.75111e-26	0.125754	0.363	0.142	9.87291e-22	Phloem	Zm00001d017575
Zm00001d013565	1.75664e-26	0.153722	0.246	0.078	9.90413e-22	Phloem	Zm00001d013565
Zm00001d032838	1.8392e-26	0.224338	0.477	0.23	1.03696e-21	Phloem	Zm00001d032838
Zm00001d053685	2.15117e-26	0.275662	0.551	0.299	1.21285e-21	Phloem	Zm00001d053685
Zm00001d009445	2.92053e-26	0.398539	0.76	0.577	1.64662e-21	Phloem	Zm00001d009445
Zm00001d042540	3.02178e-26	-0.574438	0.178	0.483	1.70371e-21	Phloem	Zm00001d042540
Zm00001d040014	3.12812e-26	0.111781	0.222	0.065	1.76367e-21	Phloem	Zm00001d040014
Zm00001d046472	3.43817e-26	0.279588	0.637	0.379	1.93847e-21	Phloem	Zm00001d046472
Zm00001d053181	5.58742e-26	0.151792	0.308	0.115	3.15025e-21	Phloem	Zm00001d053181
Zm00001d024386	5.74521e-26	0.248875	0.295	0.105	3.23921e-21	Phloem	Zm00001d024386
Zm00001d012719	7.1726e-26	0.212828	0.458	0.214	4.04398e-21	Phloem	Zm00001d012719
Zm00001d013796	7.9777e-26	0.14995	0.348	0.129	4.49791e-21	Phloem	Zm00001d013796
Zm00001d013627	8.08595e-26	0.417019	0.717	0.537	4.55894e-21	Phloem	Zm00001d013627
Zm00001d004758	8.89648e-26	0.294425	0.394	0.175	5.01592e-21	Phloem	Zm00001d004758
Zm00001d042869	1.06625e-25	-0.478647	0.397	0.634	6.01162e-21	Phloem	Zm00001d042869
Zm00001d014493	1.21646e-25	0.61817	0.723	0.542	6.8585e-21	Phloem	Zm00001d014493
Zm00001d009071	1.34117e-25	-0.541473	0.206	0.473	7.56166e-21	Phloem	Zm00001d009071
Zm00001d022102	1.40232e-25	0.213153	0.412	0.188	7.90645e-21	Phloem	Zm00001d022102
Zm00001d039304	1.64362e-25	0.280699	0.606	0.354	9.26692e-21	Phloem	Zm00001d039304
Zm00001d053296	1.68515e-25	0.334777	0.812	0.668	9.50105e-21	Phloem	Zm00001d053296
Zm00001d037477	1.98352e-25	0.219849	0.375	0.164	1.11833e-20	Phloem	Zm00001d037477
Zm00001d030131	2.28922e-25	0.332399	0.692	0.452	1.29069e-20	Phloem	Zm00001d030131
Zm00001d045220	2.39038e-25	0.173491	0.348	0.139	1.34772e-20	Phloem	Zm00001d045220
Zm00001d032123	6.26124e-25	0.366873	0.809	0.69	3.53015e-20	Phloem	Zm00001d032123
Zm00001d037771	6.93532e-25	0.105181	0.317	0.118	3.9102e-20	Phloem	Zm00001d037771
Zm00001d025873	7.41032e-25	-0.943751	0.369	0.639	4.17801e-20	Phloem	Zm00001d025873
Zm00001d024778	8.692e-25	0.573053	0.735	0.558	4.90063e-20	Phloem	Zm00001d024778
Zm00001d033707	9.21127e-25	0.392958	0.778	0.618	5.19341e-20	Phloem	Zm00001d033707
Zm00001d052321	9.88993e-25	0.337199	0.794	0.605	5.57604e-20	Phloem	Zm00001d052321
Zm00001d012909	1.04507e-24	-0.808739	0.243	0.499	5.89222e-20	Phloem	Zm00001d012909
Zm00001d043653	1.08805e-24	0.173272	0.492	0.238	6.13454e-20	Phloem	Zm00001d043653
Zm00001d029030	1.13336e-24	0.412213	0.757	0.592	6.39e-20	Phloem	Zm00001d029030
Zm00001d033174	1.30559e-24	0.398498	0.945	0.906	7.36103e-20	Phloem	Zm00001d033174
Zm00001d021119	1.5468e-24	-0.497046	0.114	0.391	8.72099e-20	Phloem	Zm00001d021119
Zm00001d002546	1.74823e-24	-0.837399	0.585	0.767	9.85672e-20	Phloem	Zm00001d002546
Zm00001d017708	1.86477e-24	0.19358	0.523	0.274	1.05138e-19	Phloem	Zm00001d017708
Zm00001d012966	1.92681e-24	0.344846	0.895	0.814	1.08636e-19	Phloem	Zm00001d012966
Zm00001d002842	1.95486e-24	0.749719	0.612	0.384	1.10217e-19	Phloem	Zm00001d002842
Zm00001d031471	1.96918e-24	0.232907	0.557	0.302	1.11024e-19	Phloem	Zm00001d031471
Zm00001d020170	2.27367e-24	-0.311132	0.089	0.369	1.28192e-19	Phloem	Zm00001d020170
Zm00001d049320	2.31489e-24	0.452245	0.803	0.665	1.30516e-19	Phloem	Zm00001d049320
Zm00001d047923	2.46655e-24	0.352974	0.735	0.53	1.39067e-19	Phloem	Zm00001d047923
Zm00001d032992	2.78329e-24	0.232638	0.434	0.201	1.56924e-19	Phloem	Zm00001d032992
Zm00001d045323	2.89675e-24	0.386154	0.895	0.837	1.63321e-19	Phloem	Zm00001d045323
Zm00001d028187	3.4607e-24	0.233617	0.532	0.287	1.95118e-19	Phloem	Zm00001d028187
Zm00001d036213	3.57032e-24	0.355207	0.914	0.875	2.01298e-19	Phloem	Zm00001d036213
Zm00001d045202	4.8574e-24	0.155874	0.348	0.143	2.73865e-19	Phloem	Zm00001d045202
Zm00001d010236	5.58871e-24	0.336416	0.902	0.834	3.15097e-19	Phloem	Zm00001d010236
Zm00001d026223	5.73753e-24	-0.509637	0.065	0.329	3.23488e-19	Phloem	Zm00001d026223
Zm00001d044291	7.0173e-24	0.209994	0.286	0.107	3.95643e-19	Phloem	Zm00001d044291
Zm00001d045130	7.52686e-24	0.204031	0.277	0.1	4.24372e-19	Phloem	Zm00001d045130
Zm00001d012474	9.25324e-24	0.122944	0.265	0.094	5.21707e-19	Phloem	Zm00001d012474
Zm00001d012734	9.35082e-24	0.104278	0.255	0.087	5.27208e-19	Phloem	Zm00001d012734
Zm00001d027899	9.70976e-24	0.197423	0.415	0.19	5.47446e-19	Phloem	Zm00001d027899
Zm00001d053442	1.13218e-23	0.334052	0.745	0.526	6.38334e-19	Phloem	Zm00001d053442
Zm00001d052741	1.17714e-23	0.139295	0.326	0.132	6.63686e-19	Phloem	Zm00001d052741
Zm00001d000112	1.37755e-23	-0.402105	0.157	0.427	7.76677e-19	Phloem	Zm00001d000112
Zm00001d026412	1.55542e-23	-0.610904	0.172	0.44	8.76963e-19	Phloem	Zm00001d026412
Zm00001d008535	1.76104e-23	0.178762	0.215	0.067	9.92894e-19	Phloem	Zm00001d008535
Zm00001d022181	2.1472e-23	-0.406586	0.268	0.532	1.21061e-18	Phloem	Zm00001d022181
Zm00001d015468	2.8037e-23	-0.349324	0.022	0.269	1.58075e-18	Phloem	Zm00001d015468
Zm00001d029747	3.11622e-23	0.403779	0.788	0.608	1.75695e-18	Phloem	Zm00001d029747
Zm00001d039710	4.2578e-23	0.171333	0.44	0.208	2.40059e-18	Phloem	Zm00001d039710
Zm00001d029359	4.77538e-23	-0.758277	0.302	0.537	2.69241e-18	Phloem	Zm00001d029359
Zm00001d042367	4.88942e-23	-0.31067	0.071	0.35	2.7567e-18	Phloem	Zm00001d042367
Zm00001d020910	5.21444e-23	0.342473	0.994	0.929	2.93995e-18	Phloem	Zm00001d020910
Zm00001d036737	6.06701e-23	0.14272	0.277	0.1	3.42064e-18	Phloem	Zm00001d036737
Zm00001d038764	6.87184e-23	-0.508478	0.157	0.409	3.87441e-18	Phloem	Zm00001d038764
Zm00001d033850	6.9081e-23	-0.277481	0.997	0.995	3.89485e-18	Phloem	Zm00001d033850
Zm00001d048021	7.43465e-23	-0.475011	0.222	0.475	4.19173e-18	Phloem	Zm00001d048021
Zm00001d016198	1.01612e-22	0.331141	0.791	0.629	5.72898e-18	Phloem	Zm00001d016198
Zm00001d019233	1.09274e-22	0.138483	0.44	0.21	6.16097e-18	Phloem	Zm00001d019233
Zm00001d034129	1.09708e-22	-0.337642	0.163	0.452	6.18547e-18	Phloem	Zm00001d034129
Zm00001d033483	1.24856e-22	0.614633	0.886	0.82	7.0395e-18	Phloem	Zm00001d033483
Zm00001d045509	1.56736e-22	0.244542	0.625	0.376	8.83695e-18	Phloem	Zm00001d045509
Zm00001d041246	1.70863e-22	-0.284076	0.997	0.991	9.63341e-18	Phloem	Zm00001d041246
Zm00001d048625	1.72513e-22	-0.408335	0.105	0.383	9.72646e-18	Phloem	Zm00001d048625
Zm00001d050768	1.94733e-22	0.287807	0.6	0.343	1.09792e-17	Phloem	Zm00001d050768
Zm00001d038552	2.04422e-22	0.445191	0.498	0.298	1.15255e-17	Phloem	Zm00001d038552
Zm00001d028755	2.27517e-22	0.235787	0.951	0.901	1.28276e-17	Phloem	Zm00001d028755
Zm00001d018809	2.45442e-22	-0.59144	0.151	0.415	1.38383e-17	Phloem	Zm00001d018809
Zm00001d033535	3.12801e-22	0.243098	0.991	0.962	1.7636e-17	Phloem	Zm00001d033535
Zm00001d019565	3.23595e-22	-0.595954	0.194	0.495	1.82446e-17	Phloem	Zm00001d019565
Zm00001d012602	4.39998e-22	0.726003	0.418	0.201	2.48075e-17	Phloem	Zm00001d012602
Zm00001d051157	4.82353e-22	-0.305755	0.148	0.439	2.71955e-17	Phloem	Zm00001d051157
Zm00001d027342	5.06715e-22	0.297177	0.895	0.859	2.85691e-17	Phloem	Zm00001d027342
Zm00001d012720	5.20524e-22	0.331224	0.532	0.295	2.93477e-17	Phloem	Zm00001d012720
Zm00001d048135	5.38742e-22	0.100487	0.243	0.084	3.03748e-17	Phloem	Zm00001d048135
Zm00001d049409	6.21709e-22	-0.441581	0.745	0.827	3.50526e-17	Phloem	Zm00001d049409
Zm00001d038321	6.64931e-22	0.204658	0.514	0.266	3.74894e-17	Phloem	Zm00001d038321
Zm00001d014422	9.84174e-22	0.151532	0.415	0.195	5.54887e-17	Phloem	Zm00001d014422
Zm00001d007234	1.17088e-21	0.455183	0.831	0.695	6.60153e-17	Phloem	Zm00001d007234
Zm00001d030348	1.21291e-21	0.144612	0.32	0.128	6.83849e-17	Phloem	Zm00001d030348
Zm00001d040422	1.29484e-21	-0.393951	0.08	0.334	7.30041e-17	Phloem	Zm00001d040422
Zm00001d022062	1.55488e-21	0.612672	0.511	0.299	8.76656e-17	Phloem	Zm00001d022062
Zm00001d024754	1.59651e-21	-0.357668	0.363	0.562	9.00131e-17	Phloem	Zm00001d024754
Zm00001d047069	1.60474e-21	0.102025	0.24	0.082	9.0477e-17	Phloem	Zm00001d047069
Zm00001d040567	1.70489e-21	-0.317991	0.08	0.331	9.61232e-17	Phloem	Zm00001d040567
Zm00001d021706	1.86977e-21	-0.503483	0.895	0.928	1.0542e-16	Phloem	Zm00001d021706
Zm00001d042726	1.90749e-21	0.32881	0.714	0.522	1.07546e-16	Phloem	Zm00001d042726
Zm00001d032313	2.08417e-21	0.318555	0.818	0.685	1.17508e-16	Phloem	Zm00001d032313
Zm00001d018507	2.1198e-21	0.246826	0.532	0.312	1.19517e-16	Phloem	Zm00001d018507
Zm00001d021891	2.2132e-21	0.346969	0.831	0.667	1.24782e-16	Phloem	Zm00001d021891
Zm00001d030837	2.33249e-21	0.14452	0.486	0.238	1.31508e-16	Phloem	Zm00001d030837
Zm00001d035156	2.34296e-21	0.310873	0.938	0.915	1.32099e-16	Phloem	Zm00001d035156
Zm00001d024678	2.57669e-21	0.106203	0.249	0.088	1.45277e-16	Phloem	Zm00001d024678
Zm00001d036547	3.14974e-21	0.427677	0.886	0.822	1.77585e-16	Phloem	Zm00001d036547
Zm00001d032873	3.51171e-21	-0.39277	0.222	0.463	1.97994e-16	Phloem	Zm00001d032873
Zm00001d022421	3.55182e-21	-0.572301	0.434	0.659	2.00255e-16	Phloem	Zm00001d022421
Zm00001d019139	4.07344e-21	-0.398169	0.529	0.7	2.29665e-16	Phloem	Zm00001d019139
Zm00001d009910	4.15592e-21	0.332868	0.785	0.658	2.34315e-16	Phloem	Zm00001d009910
Zm00001d026010	6.42556e-21	0.10517	0.228	0.076	3.62279e-16	Phloem	Zm00001d026010
Zm00001d027854	6.61187e-21	0.133024	0.295	0.117	3.72784e-16	Phloem	Zm00001d027854
Zm00001d040067	7.68214e-21	0.189819	0.36	0.161	4.33127e-16	Phloem	Zm00001d040067
Zm00001d022510	8.12953e-21	-0.34942	0.083	0.344	4.58351e-16	Phloem	Zm00001d022510
Zm00001d047814	8.36338e-21	-0.361522	0.095	0.336	4.71536e-16	Phloem	Zm00001d047814
Zm00001d025922	1.04022e-20	-0.476999	0.215	0.458	5.86484e-16	Phloem	Zm00001d025922
Zm00001d038453	1.19345e-20	-0.563481	0.126	0.383	6.72881e-16	Phloem	Zm00001d038453
Zm00001d039468	1.34155e-20	-0.467008	0.074	0.311	7.5638e-16	Phloem	Zm00001d039468
Zm00001d008214	1.51829e-20	0.148485	0.375	0.171	8.56027e-16	Phloem	Zm00001d008214
Zm00001d002132	1.54279e-20	-0.705419	0.28	0.542	8.69841e-16	Phloem	Zm00001d002132
Zm00001d018370	1.66987e-20	0.332308	0.822	0.656	9.41492e-16	Phloem	Zm00001d018370
Zm00001d029740	1.73535e-20	0.298626	0.649	0.436	9.78408e-16	Phloem	Zm00001d029740
Zm00001d052174	1.77942e-20	0.196264	0.443	0.224	1.00325e-15	Phloem	Zm00001d052174
Zm00001d029923	1.97507e-20	-0.599045	0.132	0.383	1.11356e-15	Phloem	Zm00001d029923
Zm00001d024222	2.04203e-20	0.109031	0.382	0.175	1.15132e-15	Phloem	Zm00001d024222
Zm00001d038653	2.40145e-20	0.113886	0.271	0.107	1.35396e-15	Phloem	Zm00001d038653
Zm00001d048914	2.69096e-20	0.176712	0.382	0.18	1.51719e-15	Phloem	Zm00001d048914
Zm00001d037252	2.85786e-20	0.129654	0.354	0.154	1.61129e-15	Phloem	Zm00001d037252
Zm00001d024518	3.56743e-20	0.255122	0.428	0.231	2.01135e-15	Phloem	Zm00001d024518
Zm00001d027816	3.77906e-20	0.145732	0.434	0.209	2.13067e-15	Phloem	Zm00001d027816
Zm00001d040702	4.05506e-20	0.238693	0.695	0.436	2.28628e-15	Phloem	Zm00001d040702
Zm00001d029738	4.22885e-20	0.461817	0.44	0.24	2.38427e-15	Phloem	Zm00001d029738
Zm00001d046112	4.43986e-20	0.117651	0.157	0.044	2.50324e-15	Phloem	Zm00001d046112
Zm00001d050100	4.63123e-20	-0.779882	0.446	0.654	2.61113e-15	Phloem	Zm00001d050100
Zm00001d037209	5.02155e-20	0.110789	0.268	0.104	2.8312e-15	Phloem	Zm00001d037209
Zm00001d020195	5.21502e-20	0.213193	0.489	0.26	2.94028e-15	Phloem	Zm00001d020195
Zm00001d041216	5.91237e-20	0.2451	0.603	0.393	3.33345e-15	Phloem	Zm00001d041216
Zm00001d021123	6.332e-20	0.230945	0.566	0.337	3.57004e-15	Phloem	Zm00001d021123
Zm00001d002004	7.2719e-20	-0.406787	0.135	0.397	4.09997e-15	Phloem	Zm00001d002004
Zm00001d032475	7.29687e-20	0.228938	0.412	0.208	4.11405e-15	Phloem	Zm00001d032475
Zm00001d048558	7.38151e-20	-0.426023	0.049	0.275	4.16177e-15	Phloem	Zm00001d048558
Zm00001d006810	1.04243e-19	0.153307	0.348	0.16	5.87731e-15	Phloem	Zm00001d006810
Zm00001d037381	1.51404e-19	0.452823	0.751	0.607	8.5363e-15	Phloem	Zm00001d037381
Zm00001d009309	1.62619e-19	0.175464	0.375	0.18	9.1686e-15	Phloem	Zm00001d009309
Zm00001d027851	1.80717e-19	0.315269	0.545	0.337	1.0189e-14	Phloem	Zm00001d027851
Zm00001d043156	1.85339e-19	0.159145	0.335	0.151	1.04496e-14	Phloem	Zm00001d043156
Zm00001d011366	1.89669e-19	0.12647	0.2	0.066	1.06938e-14	Phloem	Zm00001d011366
Zm00001d042725	1.94442e-19	0.287936	0.889	0.773	1.09628e-14	Phloem	Zm00001d042725
Zm00001d051478	2.16403e-19	-0.989565	0.295	0.506	1.2201e-14	Phloem	Zm00001d051478
Zm00001d026458	2.2263e-19	-0.347924	0.302	0.537	1.25521e-14	Phloem	Zm00001d026458
Zm00001d042035	2.22727e-19	-0.272778	0.034	0.26	1.25576e-14	Phloem	Zm00001d042035
Zm00001d022302	2.30129e-19	0.161278	0.375	0.18	1.29749e-14	Phloem	Zm00001d022302
Zm00001d025003	2.36199e-19	0.145558	0.486	0.252	1.33171e-14	Phloem	Zm00001d025003
Zm00001d042842	2.54936e-19	-0.34551	0.271	0.533	1.43735e-14	Phloem	Zm00001d042842
Zm00001d021736	2.64382e-19	-0.315943	0.049	0.275	1.49061e-14	Phloem	Zm00001d021736
Zm00001d021546	2.94151e-19	0.153526	0.489	0.263	1.65845e-14	Phloem	Zm00001d021546
Zm00001d001841	3.06041e-19	0.213169	0.557	0.333	1.72549e-14	Phloem	Zm00001d001841
Zm00001d017473	3.36423e-19	0.193655	0.354	0.163	1.89679e-14	Phloem	Zm00001d017473
Zm00001d034663	3.5739e-19	0.165394	0.277	0.114	2.015e-14	Phloem	Zm00001d034663
Zm00001d000197	4.24154e-19	0.229984	0.397	0.211	2.39142e-14	Phloem	Zm00001d000197
Zm00001d006651	4.30556e-19	0.276977	0.717	0.477	2.42752e-14	Phloem	Zm00001d006651
Zm00001d014463	5.02458e-19	0.686272	0.625	0.408	2.83291e-14	Phloem	Zm00001d014463
Zm00001d020003	5.20313e-19	0.302141	0.815	0.68	2.93358e-14	Phloem	Zm00001d020003
Zm00001d043318	5.2099e-19	0.290727	0.498	0.27	2.93739e-14	Phloem	Zm00001d043318
Zm00001d033969	5.23536e-19	0.172914	0.557	0.334	2.95175e-14	Phloem	Zm00001d033969
Zm00001d013406	5.38841e-19	0.100625	0.203	0.07	3.03804e-14	Phloem	Zm00001d013406
Zm00001d024379	6.03921e-19	0.345775	0.594	0.394	3.40497e-14	Phloem	Zm00001d024379
Zm00001d006760	6.27774e-19	0.213078	0.978	0.975	3.53945e-14	Phloem	Zm00001d006760
Zm00001d021629	6.61347e-19	-0.473543	0.489	0.671	3.72874e-14	Phloem	Zm00001d021629
Zm00001d003157	6.70314e-19	-0.453903	0.935	0.927	3.7793e-14	Phloem	Zm00001d003157
Zm00001d022042	7.37031e-19	0.241014	0.972	0.948	4.15545e-14	Phloem	Zm00001d022042
Zm00001d026096	7.73905e-19	0.210568	0.412	0.206	4.36335e-14	Phloem	Zm00001d026096
Zm00001d042936	7.96379e-19	0.600278	0.754	0.584	4.49007e-14	Phloem	Zm00001d042936
Zm00001d044921	8.27615e-19	0.52681	0.677	0.485	4.66617e-14	Phloem	Zm00001d044921
Zm00001d009087	9.11908e-19	0.381883	0.378	0.19	5.14143e-14	Phloem	Zm00001d009087
Zm00001d009638	9.34992e-19	-0.35298	0.228	0.488	5.27158e-14	Phloem	Zm00001d009638
Zm00001d038780	9.83508e-19	0.261519	0.502	0.297	5.54512e-14	Phloem	Zm00001d038780
Zm00001d018988	1.16147e-18	0.202106	0.508	0.294	6.54846e-14	Phloem	Zm00001d018988
Zm00001d030509	1.24861e-18	0.308199	0.911	0.74	7.0398e-14	Phloem	Zm00001d030509
Zm00001d018485	1.33867e-18	0.209069	0.483	0.276	7.54755e-14	Phloem	Zm00001d018485
Zm00001d040291	1.56784e-18	0.254664	0.714	0.527	8.83963e-14	Phloem	Zm00001d040291
Zm00001d032287	1.9031e-18	0.299274	0.542	0.327	1.07298e-13	Phloem	Zm00001d032287
Zm00001d014519	1.98163e-18	0.389399	0.926	0.902	1.11726e-13	Phloem	Zm00001d014519
Zm00001d019034	2.11182e-18	0.576294	0.858	0.787	1.19066e-13	Phloem	Zm00001d019034
Zm00001d009465	2.20248e-18	0.181194	0.462	0.246	1.24178e-13	Phloem	Zm00001d009465
Zm00001d044769	2.26043e-18	0.518175	0.711	0.548	1.27445e-13	Phloem	Zm00001d044769
Zm00001d044446	2.27571e-18	0.292846	0.76	0.597	1.28307e-13	Phloem	Zm00001d044446
Zm00001d034635	2.91896e-18	-0.527145	0.105	0.327	1.64574e-13	Phloem	Zm00001d034635
Zm00001d051362	2.97547e-18	-1.28423	0.145	0.359	1.6776e-13	Phloem	Zm00001d051362
Zm00001d013289	2.99093e-18	0.136469	0.138	0.039	1.68632e-13	Phloem	Zm00001d013289
Zm00001d013834	3.29247e-18	0.234445	0.548	0.337	1.85633e-13	Phloem	Zm00001d013834
Zm00001d045392	3.44466e-18	0.317681	0.726	0.476	1.94213e-13	Phloem	Zm00001d045392
Zm00001d049858	3.50054e-18	0.284115	0.822	0.671	1.97364e-13	Phloem	Zm00001d049858
Zm00001d034429	3.88425e-18	0.269713	0.834	0.685	2.18998e-13	Phloem	Zm00001d034429
Zm00001d032324	3.90284e-18	0.333924	0.517	0.31	2.20046e-13	Phloem	Zm00001d032324
Zm00001d011650	4.2129e-18	0.239222	0.554	0.351	2.37528e-13	Phloem	Zm00001d011650
Zm00001d041611	4.33801e-18	-0.994637	0.151	0.379	2.44581e-13	Phloem	Zm00001d041611
Zm00001d010128	4.35495e-18	0.25874	0.775	0.559	2.45536e-13	Phloem	Zm00001d010128
Zm00001d021375	4.36138e-18	0.283156	0.849	0.771	2.45899e-13	Phloem	Zm00001d021375
Zm00001d053731	4.53536e-18	0.260598	0.686	0.485	2.55708e-13	Phloem	Zm00001d053731
Zm00001d021995	4.60574e-18	0.362021	0.566	0.381	2.59676e-13	Phloem	Zm00001d021995
Zm00001d022517	5.88328e-18	-0.487641	0.102	0.314	3.31705e-13	Phloem	Zm00001d022517
Zm00001d044753	6.0873e-18	0.136943	0.465	0.248	3.43208e-13	Phloem	Zm00001d044753
Zm00001d052224	6.28185e-18	-0.533423	0.837	0.888	3.54177e-13	Phloem	Zm00001d052224
Zm00001d026664	6.90655e-18	0.114842	0.345	0.159	3.89398e-13	Phloem	Zm00001d026664
Zm00001d013644	7.50259e-18	-0.492529	0.683	0.733	4.23003e-13	Phloem	Zm00001d013644
Zm00001d014491	8.08577e-18	0.415944	0.668	0.519	4.55884e-13	Phloem	Zm00001d014491
Zm00001d006509	8.53071e-18	0.106779	0.366	0.169	4.8097e-13	Phloem	Zm00001d006509
Zm00001d017107	8.76479e-18	0.309095	0.474	0.262	4.94167e-13	Phloem	Zm00001d017107
Zm00001d018868	9.52536e-18	0.41984	0.628	0.424	5.37049e-13	Phloem	Zm00001d018868
Zm00001d029947	9.97727e-18	0.119153	0.32	0.145	5.62529e-13	Phloem	Zm00001d029947
Zm00001d019172	1.04913e-17	-0.20915	0.043	0.254	5.91508e-13	Phloem	Zm00001d019172
Zm00001d000126	1.12294e-17	0.369993	0.745	0.557	6.33123e-13	Phloem	Zm00001d000126
Zm00001d037934	1.19378e-17	0.2903	0.803	0.68	6.73067e-13	Phloem	Zm00001d037934
Zm00001d002796	1.25096e-17	-0.237703	0.055	0.275	7.05306e-13	Phloem	Zm00001d002796
Zm00001d027861	1.30657e-17	-0.290663	0.212	0.459	7.36655e-13	Phloem	Zm00001d027861
Zm00001d017454	1.32285e-17	-0.53621	0.172	0.394	7.45834e-13	Phloem	Zm00001d017454
Zm00001d042930	1.35169e-17	-0.595119	0.523	0.705	7.62097e-13	Phloem	Zm00001d042930
Zm00001d009398	1.3593e-17	-0.475781	0.108	0.337	7.66385e-13	Phloem	Zm00001d009398
Zm00001d019358	1.42202e-17	0.408996	0.8	0.69	8.0175e-13	Phloem	Zm00001d019358
Zm00001d000178	1.4506e-17	0.154641	0.415	0.217	8.17861e-13	Phloem	Zm00001d000178
Zm00001d045339	1.46444e-17	0.242074	0.652	0.445	8.25664e-13	Phloem	Zm00001d045339
Zm00001d005421	1.68269e-17	-0.244684	0.046	0.261	9.48718e-13	Phloem	Zm00001d005421
Zm00001d027504	1.79268e-17	0.13558	0.314	0.138	1.01073e-12	Phloem	Zm00001d027504
Zm00001d003833	1.82654e-17	-0.234179	0.037	0.242	1.02982e-12	Phloem	Zm00001d003833
Zm00001d026431	1.83318e-17	-0.285616	0.018	0.214	1.03356e-12	Phloem	Zm00001d026431
Zm00001d038376	1.89955e-17	0.270071	0.831	0.687	1.07098e-12	Phloem	Zm00001d038376
Zm00001d050961	1.90991e-17	0.268957	0.572	0.368	1.07683e-12	Phloem	Zm00001d050961
Zm00001d046718	1.93811e-17	0.182665	0.532	0.316	1.09273e-12	Phloem	Zm00001d046718
Zm00001d034218	2.23804e-17	0.348038	0.874	0.782	1.26183e-12	Phloem	Zm00001d034218
Zm00001d014166	2.36942e-17	0.119318	0.249	0.1	1.3359e-12	Phloem	Zm00001d014166
Zm00001d031184	2.37157e-17	0.166004	0.437	0.238	1.33712e-12	Phloem	Zm00001d031184
Zm00001d011461	2.43838e-17	0.435593	0.102	0.024	1.37478e-12	Phloem	Zm00001d011461
Zm00001d053090	2.57903e-17	0.219627	0.932	0.903	1.45408e-12	Phloem	Zm00001d053090
Zm00001d047483	2.71128e-17	0.116231	0.212	0.078	1.52865e-12	Phloem	Zm00001d047483
Zm00001d029711	2.87891e-17	0.107162	0.308	0.138	1.62316e-12	Phloem	Zm00001d029711
Zm00001d003945	2.95623e-17	-0.245647	0.182	0.426	1.66675e-12	Phloem	Zm00001d003945
Zm00001d029590	2.97326e-17	0.329673	0.6	0.405	1.67636e-12	Phloem	Zm00001d029590
Zm00001d019836	3.01329e-17	0.357046	0.615	0.456	1.69892e-12	Phloem	Zm00001d019836
Zm00001d047050	3.23938e-17	0.115759	0.252	0.101	1.8264e-12	Phloem	Zm00001d047050
Zm00001d029853	3.49268e-17	-0.388031	0.329	0.524	1.96921e-12	Phloem	Zm00001d029853
Zm00001d005602	3.60129e-17	0.245376	0.375	0.186	2.03044e-12	Phloem	Zm00001d005602
Zm00001d015986	3.61236e-17	0.15427	0.385	0.2	2.03669e-12	Phloem	Zm00001d015986
Zm00001d053295	4.05081e-17	0.284418	0.812	0.722	2.28389e-12	Phloem	Zm00001d053295
Zm00001d014947	4.43024e-17	-0.390035	0.135	0.356	2.49781e-12	Phloem	Zm00001d014947
Zm00001d038795	4.6559e-17	0.272842	0.625	0.423	2.62505e-12	Phloem	Zm00001d038795
Zm00001d016182	4.99575e-17	0.122546	0.277	0.119	2.81665e-12	Phloem	Zm00001d016182
Zm00001d049502	5.14253e-17	0.138533	0.471	0.259	2.89941e-12	Phloem	Zm00001d049502
Zm00001d022505	5.61748e-17	0.310074	0.865	0.766	3.16719e-12	Phloem	Zm00001d022505
Zm00001d025773	5.70264e-17	0.147152	0.683	0.427	3.21521e-12	Phloem	Zm00001d025773
Zm00001d042627	5.74518e-17	0.172426	0.369	0.188	3.23919e-12	Phloem	Zm00001d042627
Zm00001d048533	6.41322e-17	0.177495	0.397	0.207	3.61584e-12	Phloem	Zm00001d048533
Zm00001d048491	6.69073e-17	-0.771693	0.418	0.58	3.7723e-12	Phloem	Zm00001d048491
Zm00001d013310	6.76469e-17	0.10978	0.385	0.192	3.814e-12	Phloem	Zm00001d013310
Zm00001d001951	6.78086e-17	0.301024	0.766	0.607	3.82312e-12	Phloem	Zm00001d001951
Zm00001d037969	6.81108e-17	-0.956646	0.16	0.361	3.84015e-12	Phloem	Zm00001d037969
Zm00001d045459	6.9107e-17	0.3984	0.532	0.346	3.89632e-12	Phloem	Zm00001d045459
Zm00001d053055	7.31252e-17	0.246281	0.64	0.407	4.12287e-12	Phloem	Zm00001d053055
Zm00001d043795	7.39469e-17	0.727595	0.754	0.63	4.1692e-12	Phloem	Zm00001d043795
Zm00001d019593	7.84675e-17	-0.192856	0.055	0.27	4.42408e-12	Phloem	Zm00001d019593
Zm00001d002690	8.80953e-17	-0.823308	0.197	0.403	4.9669e-12	Phloem	Zm00001d002690
Zm00001d004413	9.46791e-17	-0.496884	0.271	0.462	5.3381e-12	Phloem	Zm00001d004413
Zm00001d011668	1.01845e-16	0.161217	0.471	0.264	5.74214e-12	Phloem	Zm00001d011668
Zm00001d038200	1.04637e-16	0.176335	0.732	0.504	5.89955e-12	Phloem	Zm00001d038200
Zm00001d012042	1.10417e-16	0.233408	0.88	0.825	6.22543e-12	Phloem	Zm00001d012042
Zm00001d018333	1.17216e-16	0.155165	0.471	0.256	6.60877e-12	Phloem	Zm00001d018333
Zm00001d023664	1.23184e-16	0.212247	0.415	0.222	6.94525e-12	Phloem	Zm00001d023664
Zm00001d049826	1.26161e-16	0.22951	0.898	0.851	7.11311e-12	Phloem	Zm00001d049826
Zm00001d031619	1.41704e-16	0.14902	0.286	0.122	7.9894e-12	Phloem	Zm00001d031619
Zm00001d004843	1.56596e-16	-0.407441	0.049	0.25	8.82906e-12	Phloem	Zm00001d004843
Zm00001d042216	1.59797e-16	0.245692	0.908	0.825	9.0095e-12	Phloem	Zm00001d042216
Zm00001d042512	1.61677e-16	-0.342739	0.277	0.459	9.11553e-12	Phloem	Zm00001d042512
Zm00001d038648	1.84886e-16	0.181171	0.569	0.355	1.04241e-11	Phloem	Zm00001d038648
Zm00001d006374	1.95514e-16	0.117992	0.206	0.076	1.10233e-11	Phloem	Zm00001d006374
Zm00001d012080	2.00491e-16	-0.946866	0.237	0.435	1.13039e-11	Phloem	Zm00001d012080
Zm00001d022616	2.01591e-16	0.242209	0.849	0.68	1.13659e-11	Phloem	Zm00001d022616
Zm00001d028453	2.15315e-16	0.265695	0.738	0.557	1.21397e-11	Phloem	Zm00001d028453
Zm00001d016154	2.15726e-16	0.204117	0.582	0.367	1.21629e-11	Phloem	Zm00001d016154
Zm00001d006711	2.22679e-16	0.382633	0.763	0.648	1.25549e-11	Phloem	Zm00001d006711
Zm00001d049336	2.27809e-16	-0.613156	0.166	0.384	1.28441e-11	Phloem	Zm00001d049336
Zm00001d030864	2.29012e-16	0.122663	0.526	0.292	1.29119e-11	Phloem	Zm00001d030864
Zm00001d038270	2.70997e-16	0.122072	0.311	0.143	1.52791e-11	Phloem	Zm00001d038270
Zm00001d052978	3.24943e-16	0.283245	0.683	0.524	1.83206e-11	Phloem	Zm00001d052978
Zm00001d013573	3.321e-16	0.233918	0.545	0.348	1.87241e-11	Phloem	Zm00001d013573
Zm00001d012276	3.41057e-16	-0.687058	0.815	0.871	1.92291e-11	Phloem	Zm00001d012276
Zm00001d032686	3.47533e-16	-0.266592	0.086	0.298	1.95942e-11	Phloem	Zm00001d032686
Zm00001d013052	3.8852e-16	0.163636	0.403	0.213	2.19051e-11	Phloem	Zm00001d013052
Zm00001d032405	4.3609e-16	-0.471241	0.317	0.487	2.45872e-11	Phloem	Zm00001d032405
Zm00001d035629	4.66066e-16	0.18126	0.452	0.252	2.62773e-11	Phloem	Zm00001d035629
Zm00001d040379	4.69095e-16	-0.533437	0.16	0.375	2.64481e-11	Phloem	Zm00001d040379
Zm00001d047124	4.7632e-16	-0.306521	0.129	0.348	2.68554e-11	Phloem	Zm00001d047124
Zm00001d051929	4.8269e-16	0.251779	0.948	0.928	2.72146e-11	Phloem	Zm00001d051929
Zm00001d029872	4.98856e-16	0.285362	0.723	0.55	2.8126e-11	Phloem	Zm00001d029872
Zm00001d034768	5.40331e-16	0.239159	0.88	0.815	3.04644e-11	Phloem	Zm00001d034768
Zm00001d049179	5.81191e-16	-0.516028	0.523	0.672	3.27681e-11	Phloem	Zm00001d049179
Zm00001d028953	6.80296e-16	0.131125	0.234	0.097	3.83558e-11	Phloem	Zm00001d028953
Zm00001d002052	6.8551e-16	-0.357269	0.132	0.364	3.86498e-11	Phloem	Zm00001d002052
Zm00001d038717	8.03718e-16	0.139989	0.292	0.136	4.53144e-11	Phloem	Zm00001d038717
Zm00001d003546	8.23073e-16	0.161887	0.495	0.285	4.64057e-11	Phloem	Zm00001d003546
Zm00001d048393	8.30031e-16	0.200948	0.554	0.347	4.6798e-11	Phloem	Zm00001d048393
Zm00001d030014	8.62124e-16	0.151144	0.505	0.283	4.86074e-11	Phloem	Zm00001d030014
Zm00001d027411	8.65214e-16	0.22264	0.606	0.396	4.87816e-11	Phloem	Zm00001d027411
Zm00001d039089	9.57258e-16	0.218535	0.923	0.871	5.39711e-11	Phloem	Zm00001d039089
Zm00001d031727	9.62907e-16	-0.277899	0.074	0.27	5.42897e-11	Phloem	Zm00001d031727
Zm00001d042104	9.85972e-16	-0.587104	0.215	0.428	5.55901e-11	Phloem	Zm00001d042104
Zm00001d020696	1.06609e-15	0.12793	0.495	0.28	6.01073e-11	Phloem	Zm00001d020696
Zm00001d010649	1.07393e-15	0.257781	0.483	0.297	6.05494e-11	Phloem	Zm00001d010649
Zm00001d024906	1.07676e-15	0.126413	0.449	0.246	6.07087e-11	Phloem	Zm00001d024906
Zm00001d039733	1.0816e-15	-0.579185	0.834	0.898	6.09819e-11	Phloem	Zm00001d039733
Zm00001d028071	1.24864e-15	0.133172	0.415	0.222	7.03993e-11	Phloem	Zm00001d028071
Zm00001d012875	1.41859e-15	0.328419	0.738	0.601	7.99816e-11	Phloem	Zm00001d012875
Zm00001d045154	1.43446e-15	0.131945	0.246	0.105	8.08764e-11	Phloem	Zm00001d045154
Zm00001d040196	1.51811e-15	-0.264525	0.058	0.256	8.55925e-11	Phloem	Zm00001d040196
Zm00001d021930	1.54981e-15	0.269972	0.732	0.589	8.73799e-11	Phloem	Zm00001d021930
Zm00001d009084	1.56843e-15	0.178028	0.48	0.274	8.84295e-11	Phloem	Zm00001d009084
Zm00001d020311	1.88423e-15	0.278792	0.8	0.684	1.06235e-10	Phloem	Zm00001d020311
Zm00001d004768	1.94196e-15	0.237354	0.674	0.476	1.0949e-10	Phloem	Zm00001d004768
Zm00001d017386	1.99471e-15	0.276003	0.194	0.074	1.12464e-10	Phloem	Zm00001d017386
Zm00001d041767	2.1448e-15	0.145953	0.422	0.23	1.20926e-10	Phloem	Zm00001d041767
Zm00001d013245	2.29908e-15	0.296131	0.628	0.467	1.29624e-10	Phloem	Zm00001d013245
Zm00001d046834	2.37913e-15	-0.241356	0.022	0.201	1.34138e-10	Phloem	Zm00001d046834
Zm00001d043650	2.45352e-15	-0.192925	0.046	0.242	1.38332e-10	Phloem	Zm00001d043650
Zm00001d014758	2.49674e-15	-0.611973	0.489	0.584	1.40769e-10	Phloem	Zm00001d014758
Zm00001d042437	2.67944e-15	-0.254556	0.132	0.34	1.5107e-10	Phloem	Zm00001d042437
Zm00001d049940	2.71102e-15	0.118257	0.397	0.21	1.5285e-10	Phloem	Zm00001d049940
Zm00001d047114	2.87649e-15	-1.27054	0.077	0.263	1.62179e-10	Phloem	Zm00001d047114
Zm00001d039607	3.60807e-15	-0.432847	0.046	0.225	2.03427e-10	Phloem	Zm00001d039607
Zm00001d007633	3.99927e-15	0.31673	0.822	0.756	2.25483e-10	Phloem	Zm00001d007633
Zm00001d036777	4.06733e-15	0.134048	0.455	0.257	2.2932e-10	Phloem	Zm00001d036777
Zm00001d037677	4.12164e-15	0.244757	0.462	0.26	2.32382e-10	Phloem	Zm00001d037677
Zm00001d046186	4.22869e-15	-0.246506	0.068	0.269	2.38418e-10	Phloem	Zm00001d046186
Zm00001d026426	4.25616e-15	0.168726	0.655	0.403	2.39966e-10	Phloem	Zm00001d026426
Zm00001d017019	4.61453e-15	0.409126	0.382	0.21	2.60172e-10	Phloem	Zm00001d017019
Zm00001d039370	4.62655e-15	-0.361138	0.578	0.675	2.60849e-10	Phloem	Zm00001d039370
Zm00001d039372	4.63181e-15	0.269239	0.898	0.809	2.61146e-10	Phloem	Zm00001d039372
Zm00001d040323	4.66769e-15	0.305846	0.732	0.578	2.63169e-10	Phloem	Zm00001d040323
Zm00001d001880	4.88597e-15	0.263758	0.889	0.781	2.75476e-10	Phloem	Zm00001d001880
Zm00001d047663	5.11216e-15	-0.260273	0.062	0.253	2.88228e-10	Phloem	Zm00001d047663
Zm00001d050106	5.16269e-15	0.254766	0.738	0.578	2.91078e-10	Phloem	Zm00001d050106
Zm00001d040759	5.52538e-15	0.131784	0.348	0.178	3.11527e-10	Phloem	Zm00001d040759
Zm00001d039505	5.56773e-15	0.27572	0.846	0.768	3.13914e-10	Phloem	Zm00001d039505
Zm00001d007872	5.74992e-15	0.35501	0.711	0.555	3.24186e-10	Phloem	Zm00001d007872
Zm00001d038351	5.99306e-15	0.359547	0.883	0.85	3.37895e-10	Phloem	Zm00001d038351
Zm00001d042313	6.08339e-15	0.179468	0.56	0.342	3.42988e-10	Phloem	Zm00001d042313
Zm00001d015918	6.31086e-15	0.245951	0.498	0.312	3.55812e-10	Phloem	Zm00001d015918
Zm00001d039624	6.57669e-15	0.195843	0.612	0.387	3.70801e-10	Phloem	Zm00001d039624
Zm00001d013505	6.66682e-15	0.210633	0.711	0.52	3.75882e-10	Phloem	Zm00001d013505
Zm00001d044008	6.89891e-15	-0.246188	0.065	0.26	3.88968e-10	Phloem	Zm00001d044008
Zm00001d023888	7.0036e-15	0.112852	0.345	0.173	3.9487e-10	Phloem	Zm00001d023888
Zm00001d019280	7.00399e-15	0.312868	0.643	0.464	3.94892e-10	Phloem	Zm00001d019280
Zm00001d003464	7.00503e-15	0.238546	0.702	0.518	3.94951e-10	Phloem	Zm00001d003464
Zm00001d018134	7.23941e-15	0.253997	0.929	0.867	4.08165e-10	Phloem	Zm00001d018134
Zm00001d034761	7.3993e-15	0.226805	0.775	0.566	4.1718e-10	Phloem	Zm00001d034761
Zm00001d049239	7.49445e-15	-0.278901	0.988	0.976	4.22544e-10	Phloem	Zm00001d049239
Zm00001d017548	7.50273e-15	0.18584	0.523	0.322	4.23011e-10	Phloem	Zm00001d017548
Zm00001d012015	7.64887e-15	0.122863	0.249	0.108	4.31251e-10	Phloem	Zm00001d012015
Zm00001d040164	7.73641e-15	0.233979	0.843	0.76	4.36187e-10	Phloem	Zm00001d040164
Zm00001d047951	8.03131e-15	0.246703	0.628	0.436	4.52814e-10	Phloem	Zm00001d047951
Zm00001d021359	8.32738e-15	0.182049	0.471	0.278	4.69506e-10	Phloem	Zm00001d021359
Zm00001d045555	9.06738e-15	0.248476	0.874	0.799	5.11228e-10	Phloem	Zm00001d045555
Zm00001d042935	9.31597e-15	-0.84331	0.283	0.461	5.25244e-10	Phloem	Zm00001d042935
Zm00001d027318	1.00715e-14	0.229215	0.871	0.786	5.67839e-10	Phloem	Zm00001d027318
Zm00001d012335	1.03804e-14	-0.323339	0.12	0.307	5.85257e-10	Phloem	Zm00001d012335
Zm00001d038905	1.06399e-14	0.195414	0.554	0.368	5.99887e-10	Phloem	Zm00001d038905
Zm00001d041672	1.08875e-14	-0.442404	0.182	0.394	6.1385e-10	Phloem	Zm00001d041672
Zm00001d017292	1.12529e-14	-0.561144	0.317	0.533	6.34452e-10	Phloem	Zm00001d017292
Zm00001d053641	1.19631e-14	0.233475	0.585	0.392	6.74494e-10	Phloem	Zm00001d053641
Zm00001d046599	1.20127e-14	0.248796	0.6	0.423	6.77289e-10	Phloem	Zm00001d046599
Zm00001d017547	1.28789e-14	0.39744	0.732	0.564	7.26126e-10	Phloem	Zm00001d017547
Zm00001d047203	1.29025e-14	-0.294964	0.135	0.33	7.27456e-10	Phloem	Zm00001d047203
Zm00001d028963	1.29586e-14	0.230811	0.886	0.818	7.30621e-10	Phloem	Zm00001d028963
Zm00001d047750	1.30796e-14	0.132771	0.314	0.155	7.37443e-10	Phloem	Zm00001d047750
Zm00001d042609	1.36469e-14	-0.436653	0.354	0.523	7.69427e-10	Phloem	Zm00001d042609
Zm00001d053560	1.61696e-14	0.329268	0.772	0.651	9.11658e-10	Phloem	Zm00001d053560
Zm00001d023529	1.63484e-14	-0.922303	0.111	0.296	9.21738e-10	Phloem	Zm00001d023529
Zm00001d034319	1.68669e-14	-0.348421	0.498	0.628	9.50971e-10	Phloem	Zm00001d034319
Zm00001d051687	2.07024e-14	0.112517	0.209	0.085	1.16722e-09	Phloem	Zm00001d051687
Zm00001d011036	2.16385e-14	0.225622	0.615	0.415	1.22e-09	Phloem	Zm00001d011036
Zm00001d037540	2.22698e-14	0.182218	0.686	0.459	1.25559e-09	Phloem	Zm00001d037540
Zm00001d029356	2.4249e-14	-0.379152	0.12	0.314	1.36718e-09	Phloem	Zm00001d029356
Zm00001d028064	2.4675e-14	0.130856	0.218	0.09	1.3912e-09	Phloem	Zm00001d028064
Zm00001d042634	2.51443e-14	-0.269573	0.218	0.415	1.41766e-09	Phloem	Zm00001d042634
Zm00001d020521	2.51458e-14	0.184725	0.335	0.171	1.41775e-09	Phloem	Zm00001d020521
Zm00001d015730	2.56723e-14	0.174596	0.557	0.353	1.44743e-09	Phloem	Zm00001d015730
Zm00001d051799	2.69947e-14	-0.345485	0.089	0.276	1.52199e-09	Phloem	Zm00001d051799
Zm00001d036241	2.81302e-14	0.154603	0.378	0.202	1.58601e-09	Phloem	Zm00001d036241
Zm00001d000004	2.84873e-14	0.220661	0.628	0.453	1.60614e-09	Phloem	Zm00001d000004
Zm00001d045764	2.99984e-14	0.101459	0.357	0.184	1.69134e-09	Phloem	Zm00001d045764
Zm00001d048335	3.19027e-14	0.101631	0.342	0.171	1.7987e-09	Phloem	Zm00001d048335
Zm00001d033683	3.4696e-14	-0.455241	0.151	0.341	1.9562e-09	Phloem	Zm00001d033683
Zm00001d027325	3.53434e-14	0.121115	0.425	0.237	1.99269e-09	Phloem	Zm00001d027325
Zm00001d022506	3.66869e-14	0.127607	0.403	0.222	2.06844e-09	Phloem	Zm00001d022506
Zm00001d019981	3.84012e-14	-0.161574	0.046	0.228	2.1651e-09	Phloem	Zm00001d019981
Zm00001d013934	3.98686e-14	-0.239466	0.055	0.232	2.24783e-09	Phloem	Zm00001d013934
Zm00001d044339	4.08736e-14	-0.289984	0.083	0.278	2.30449e-09	Phloem	Zm00001d044339
Zm00001d002837	4.18989e-14	0.175341	0.422	0.228	2.3623e-09	Phloem	Zm00001d002837
Zm00001d019093	4.38548e-14	0.104524	0.342	0.176	2.47258e-09	Phloem	Zm00001d019093
Zm00001d035308	4.49413e-14	-0.253334	0.108	0.321	2.53384e-09	Phloem	Zm00001d035308
Zm00001d023856	4.52782e-14	0.377556	0.658	0.484	2.55283e-09	Phloem	Zm00001d023856
Zm00001d034337	4.78227e-14	0.257069	0.803	0.711	2.69629e-09	Phloem	Zm00001d034337
Zm00001d029361	4.83076e-14	-0.541567	0.775	0.693	2.72363e-09	Phloem	Zm00001d029361
Zm00001d028025	4.85912e-14	0.160828	0.468	0.276	2.73962e-09	Phloem	Zm00001d028025
Zm00001d028613	4.93701e-14	0.103446	0.345	0.175	2.78354e-09	Phloem	Zm00001d028613
Zm00001d009487	4.99804e-14	0.248874	0.477	0.297	2.81794e-09	Phloem	Zm00001d009487
Zm00001d042973	5.25969e-14	0.114271	0.523	0.304	2.96546e-09	Phloem	Zm00001d042973
Zm00001d044373	5.54714e-14	0.12982	0.388	0.21	3.12753e-09	Phloem	Zm00001d044373
Zm00001d014944	5.58144e-14	0.237294	0.828	0.689	3.14687e-09	Phloem	Zm00001d014944
Zm00001d015308	5.64754e-14	0.134334	0.538	0.34	3.18414e-09	Phloem	Zm00001d015308
Zm00001d028102	6.39976e-14	0.164335	0.575	0.362	3.60825e-09	Phloem	Zm00001d028102
Zm00001d048317	6.81527e-14	0.173866	0.514	0.32	3.84252e-09	Phloem	Zm00001d048317
Zm00001d053376	6.81586e-14	0.119545	0.415	0.224	3.84285e-09	Phloem	Zm00001d053376
Zm00001d028930	7.04813e-14	0.207748	0.446	0.271	3.97381e-09	Phloem	Zm00001d028930
Zm00001d044246	7.23874e-14	-0.583134	0.905	0.916	4.08127e-09	Phloem	Zm00001d044246
Zm00001d026505	7.34252e-14	0.148501	0.332	0.167	4.13979e-09	Phloem	Zm00001d026505
Zm00001d013230	7.4179e-14	-0.255866	0.145	0.334	4.18228e-09	Phloem	Zm00001d013230
Zm00001d038346	7.52956e-14	0.155219	0.394	0.216	4.24524e-09	Phloem	Zm00001d038346
Zm00001d009985	8.0979e-14	0.138569	0.317	0.158	4.56568e-09	Phloem	Zm00001d009985
Zm00001d044157	8.41323e-14	-0.385945	0.28	0.469	4.74346e-09	Phloem	Zm00001d044157
Zm00001d022190	8.47006e-14	0.100813	0.422	0.231	4.7755e-09	Phloem	Zm00001d022190
Zm00001d019507	8.79719e-14	0.11819	0.385	0.204	4.95995e-09	Phloem	Zm00001d019507
Zm00001d049723	8.81997e-14	0.198685	0.766	0.608	4.97279e-09	Phloem	Zm00001d049723
Zm00001d033149	8.86518e-14	0.120279	0.483	0.284	4.99828e-09	Phloem	Zm00001d033149
Zm00001d016469	9.55297e-14	-0.320147	0.468	0.636	5.38606e-09	Phloem	Zm00001d016469
Zm00001d038476	1.00375e-13	0.345531	0.637	0.468	5.65923e-09	Phloem	Zm00001d038476
Zm00001d039776	1.0335e-13	0.199497	0.517	0.331	5.82699e-09	Phloem	Zm00001d039776
Zm00001d035492	1.04842e-13	0.219437	0.597	0.404	5.91108e-09	Phloem	Zm00001d035492
Zm00001d008923	1.05588e-13	0.333063	0.658	0.495	5.95316e-09	Phloem	Zm00001d008923
Zm00001d038689	1.13533e-13	-0.280468	0.246	0.427	6.40109e-09	Phloem	Zm00001d038689
Zm00001d037751	1.29799e-13	0.299467	0.668	0.495	7.3182e-09	Phloem	Zm00001d037751
Zm00001d022569	1.30771e-13	-0.983775	0.572	0.591	7.37299e-09	Phloem	Zm00001d022569
Zm00001d015289	1.34242e-13	0.10845	0.345	0.175	7.56869e-09	Phloem	Zm00001d015289
Zm00001d048577	1.38677e-13	-0.218067	0.117	0.317	7.81875e-09	Phloem	Zm00001d048577
Zm00001d007327	1.40702e-13	-0.183861	0.034	0.201	7.93292e-09	Phloem	Zm00001d007327
Zm00001d047697	1.57536e-13	0.234745	0.951	0.93	8.88203e-09	Phloem	Zm00001d047697
Zm00001d019553	1.69658e-13	0.24509	0.655	0.471	9.56548e-09	Phloem	Zm00001d019553
Zm00001d029595	1.77402e-13	0.320605	0.831	0.779	1.00021e-08	Phloem	Zm00001d029595
Zm00001d020659	1.79056e-13	0.242679	0.689	0.539	1.00954e-08	Phloem	Zm00001d020659
Zm00001d005193	1.79299e-13	-0.18222	0.018	0.174	1.01091e-08	Phloem	Zm00001d005193
Zm00001d037725	1.93692e-13	0.231615	0.797	0.689	1.09205e-08	Phloem	Zm00001d037725
Zm00001d034432	2.0779e-13	0.152069	0.471	0.292	1.17154e-08	Phloem	Zm00001d034432
Zm00001d000305	2.0857e-13	0.175669	0.566	0.368	1.17594e-08	Phloem	Zm00001d000305
Zm00001d037495	2.2506e-13	0.106462	0.388	0.207	1.26891e-08	Phloem	Zm00001d037495
Zm00001d015061	2.2704e-13	0.121657	0.489	0.296	1.28007e-08	Phloem	Zm00001d015061
Zm00001d018297	2.3008e-13	0.158184	0.526	0.339	1.29721e-08	Phloem	Zm00001d018297
Zm00001d011500	2.33331e-13	-0.25195	0.271	0.47	1.31555e-08	Phloem	Zm00001d011500
Zm00001d037547	2.34169e-13	-0.44235	0.037	0.201	1.32027e-08	Phloem	Zm00001d037547
Zm00001d047608	2.36377e-13	0.309201	0.809	0.697	1.33272e-08	Phloem	Zm00001d047608
Zm00001d010902	2.39252e-13	0.247272	0.788	0.655	1.34892e-08	Phloem	Zm00001d010902
Zm00001d039695	2.44967e-13	-0.225846	0.009	0.16	1.38115e-08	Phloem	Zm00001d039695
Zm00001d003016	2.4962e-13	-0.183769	0.037	0.207	1.40738e-08	Phloem	Zm00001d003016
Zm00001d044247	2.51664e-13	-0.471194	0.674	0.743	1.41891e-08	Phloem	Zm00001d044247
Zm00001d025241	2.53377e-13	-0.282301	0.203	0.436	1.42856e-08	Phloem	Zm00001d025241
Zm00001d017402	2.63527e-13	-0.271014	0.037	0.199	1.48579e-08	Phloem	Zm00001d017402
Zm00001d011451	2.80516e-13	0.235402	0.465	0.303	1.58158e-08	Phloem	Zm00001d011451
Zm00001d018080	2.82697e-13	-0.396877	0.025	0.18	1.59388e-08	Phloem	Zm00001d018080
Zm00001d053177	2.828e-13	0.195246	0.757	0.586	1.59446e-08	Phloem	Zm00001d053177
Zm00001d004553	3.01272e-13	-0.283334	0.043	0.213	1.6986e-08	Phloem	Zm00001d004553
Zm00001d028601	3.09572e-13	-0.346118	0.262	0.434	1.7454e-08	Phloem	Zm00001d028601
Zm00001d043830	3.14343e-13	0.390936	0.538	0.401	1.77229e-08	Phloem	Zm00001d043830
Zm00001d028368	3.19912e-13	-0.372634	0.332	0.489	1.8037e-08	Phloem	Zm00001d028368
Zm00001d015379	3.37531e-13	0.1628	0.554	0.347	1.90303e-08	Phloem	Zm00001d015379
Zm00001d019263	3.51103e-13	0.200229	0.698	0.525	1.97955e-08	Phloem	Zm00001d019263
Zm00001d019045	3.78991e-13	-0.736108	0.806	0.852	2.13679e-08	Phloem	Zm00001d019045
Zm00001d045893	4.03227e-13	0.300364	0.674	0.549	2.27343e-08	Phloem	Zm00001d045893
Zm00001d027760	4.04532e-13	-0.588449	0.354	0.526	2.28079e-08	Phloem	Zm00001d027760
Zm00001d033966	4.10088e-13	0.161202	0.431	0.256	2.31212e-08	Phloem	Zm00001d033966
Zm00001d027557	4.10605e-13	-0.464798	0.332	0.541	2.31503e-08	Phloem	Zm00001d027557
Zm00001d010056	4.2112e-13	-0.357351	0.305	0.5	2.37432e-08	Phloem	Zm00001d010056
Zm00001d038676	4.25056e-13	0.195534	0.557	0.363	2.39651e-08	Phloem	Zm00001d038676
Zm00001d029028	4.32659e-13	0.251034	0.529	0.36	2.43937e-08	Phloem	Zm00001d029028
Zm00001d040519	4.52015e-13	-0.33014	0.148	0.334	2.54851e-08	Phloem	Zm00001d040519
Zm00001d044747	4.56449e-13	-0.27518	0.151	0.325	2.57351e-08	Phloem	Zm00001d044747
Zm00001d038147	4.67053e-13	0.277695	0.794	0.69	2.63329e-08	Phloem	Zm00001d038147
Zm00001d026163	4.74654e-13	-1.26003	0.105	0.275	2.67614e-08	Phloem	Zm00001d026163
Zm00001d034387	4.99897e-13	-0.279026	0.132	0.311	2.81847e-08	Phloem	Zm00001d034387
Zm00001d032821	5.18892e-13	-0.761476	0.068	0.235	2.92557e-08	Phloem	Zm00001d032821
Zm00001d025628	5.30824e-13	0.171258	0.505	0.325	2.99284e-08	Phloem	Zm00001d025628
Zm00001d043601	5.32842e-13	-0.203314	0.083	0.263	3.00422e-08	Phloem	Zm00001d043601
Zm00001d002451	5.35113e-13	-0.536665	0.606	0.681	3.01702e-08	Phloem	Zm00001d002451
Zm00001d007486	5.39635e-13	0.196843	0.44	0.261	3.04251e-08	Phloem	Zm00001d007486
Zm00001d010618	5.40816e-13	0.250579	0.815	0.72	3.04918e-08	Phloem	Zm00001d010618
Zm00001d045136	5.6294e-13	0.1755	0.566	0.373	3.17391e-08	Phloem	Zm00001d045136
Zm00001d051672	5.77824e-13	0.329252	0.751	0.607	3.25783e-08	Phloem	Zm00001d051672
Zm00001d017617	5.84363e-13	0.280942	0.883	0.758	3.2947e-08	Phloem	Zm00001d017617
Zm00001d041458	6.68173e-13	-0.26652	0.034	0.192	3.76723e-08	Phloem	Zm00001d041458
Zm00001d005542	6.79256e-13	-0.316293	0.548	0.649	3.82971e-08	Phloem	Zm00001d005542
Zm00001d021300	6.85907e-13	-0.588387	0.458	0.62	3.86721e-08	Phloem	Zm00001d021300
Zm00001d047917	7.07408e-13	0.105811	0.338	0.178	3.98844e-08	Phloem	Zm00001d047917
Zm00001d016379	7.22985e-13	0.221338	0.412	0.241	4.07626e-08	Phloem	Zm00001d016379
Zm00001d040375	7.53106e-13	0.252059	0.363	0.206	4.24609e-08	Phloem	Zm00001d040375
Zm00001d028948	7.65269e-13	0.426837	0.677	0.54	4.31466e-08	Phloem	Zm00001d028948
Zm00001d047476	7.66763e-13	0.16499	0.492	0.311	4.32309e-08	Phloem	Zm00001d047476
Zm00001d025381	7.84595e-13	-0.873198	0.351	0.5	4.42363e-08	Phloem	Zm00001d025381
Zm00001d018194	7.94742e-13	-0.377083	0.382	0.521	4.48084e-08	Phloem	Zm00001d018194
Zm00001d015473	8.20709e-13	0.242413	0.858	0.788	4.62724e-08	Phloem	Zm00001d015473
Zm00001d052252	8.53145e-13	0.168403	0.498	0.309	4.81011e-08	Phloem	Zm00001d052252
Zm00001d012607	9.30821e-13	0.412022	0.723	0.609	5.24806e-08	Phloem	Zm00001d012607
Zm00001d020984	9.83238e-13	-0.253317	0.074	0.252	5.54359e-08	Phloem	Zm00001d020984
Zm00001d018103	1.06429e-12	0.184462	0.425	0.256	6.00059e-08	Phloem	Zm00001d018103
Zm00001d052767	1.06545e-12	0.130696	0.452	0.26	6.00709e-08	Phloem	Zm00001d052767
Zm00001d040056	1.09806e-12	0.102538	0.369	0.199	6.19097e-08	Phloem	Zm00001d040056
Zm00001d002659	1.16302e-12	0.150343	0.754	0.597	6.5572e-08	Phloem	Zm00001d002659
Zm00001d044441	1.18438e-12	0.265938	0.858	0.793	6.67764e-08	Phloem	Zm00001d044441
Zm00001d011918	1.18783e-12	0.12502	0.292	0.148	6.69709e-08	Phloem	Zm00001d011918
Zm00001d025913	1.1917e-12	-0.784456	0.782	0.795	6.71894e-08	Phloem	Zm00001d025913
Zm00001d028377	1.20729e-12	0.145861	0.477	0.297	6.8068e-08	Phloem	Zm00001d028377
Zm00001d036054	1.21948e-12	0.210873	0.723	0.523	6.87557e-08	Phloem	Zm00001d036054
Zm00001d002601	1.2853e-12	-0.543101	0.775	0.8	7.24663e-08	Phloem	Zm00001d002601
Zm00001d043905	1.33258e-12	0.246654	0.769	0.666	7.51321e-08	Phloem	Zm00001d043905
Zm00001d010588	1.36047e-12	-0.294589	0.129	0.312	7.67045e-08	Phloem	Zm00001d010588
Zm00001d021955	1.37489e-12	0.291688	0.837	0.737	7.75176e-08	Phloem	Zm00001d021955
Zm00001d014282	1.40846e-12	-0.664674	0.545	0.591	7.94106e-08	Phloem	Zm00001d014282
Zm00001d051800	1.41689e-12	-0.170189	0.015	0.162	7.98857e-08	Phloem	Zm00001d051800
Zm00001d043762	1.41751e-12	-0.355694	0.258	0.44	7.99206e-08	Phloem	Zm00001d043762
Zm00001d025401	1.45805e-12	0.463543	0.542	0.381	8.22063e-08	Phloem	Zm00001d025401
Zm00001d025474	1.54427e-12	-0.170063	0.018	0.166	8.70675e-08	Phloem	Zm00001d025474
Zm00001d051634	1.63973e-12	0.134848	0.474	0.29	9.24494e-08	Phloem	Zm00001d051634
Zm00001d013825	1.66139e-12	0.158109	0.268	0.131	9.36706e-08	Phloem	Zm00001d013825
Zm00001d032070	1.6641e-12	-0.692875	0.822	0.87	9.38237e-08	Phloem	Zm00001d032070
Zm00001d047217	1.6996e-12	0.199474	0.618	0.454	9.58253e-08	Phloem	Zm00001d047217
Zm00001d034388	1.71187e-12	-0.403158	0.212	0.405	9.65169e-08	Phloem	Zm00001d034388
Zm00001d034588	1.72059e-12	0.159426	0.446	0.266	9.70084e-08	Phloem	Zm00001d034588
Zm00001d036151	1.75658e-12	0.260269	0.769	0.684	9.90379e-08	Phloem	Zm00001d036151
Zm00001d049984	1.81996e-12	0.21675	0.788	0.638	1.02611e-07	Phloem	Zm00001d049984
GRMZM5G845024	1.94781e-12	0.289594	0.44	0.26	1.09819e-07	Phloem	GRMZM5G845024
Zm00001d038995	2.08294e-12	0.146583	0.554	0.37	1.17438e-07	Phloem	Zm00001d038995
Zm00001d053066	2.09687e-12	0.128369	0.351	0.195	1.18224e-07	Phloem	Zm00001d053066
Zm00001d044390	2.23231e-12	0.225376	0.683	0.525	1.2586e-07	Phloem	Zm00001d044390
Zm00001d035543	2.27852e-12	0.424716	0.726	0.612	1.28465e-07	Phloem	Zm00001d035543
Zm00001d017849	2.35571e-12	-0.239036	0.062	0.222	1.32817e-07	Phloem	Zm00001d017849
Zm00001d053566	2.42787e-12	0.112959	0.412	0.235	1.36886e-07	Phloem	Zm00001d053566
Zm00001d047330	2.49014e-12	-0.178149	0.028	0.178	1.40397e-07	Phloem	Zm00001d047330
Zm00001d017847	2.57327e-12	0.274186	0.88	0.82	1.45084e-07	Phloem	Zm00001d017847
Zm00001d018938	2.64887e-12	0.13406	0.415	0.244	1.49346e-07	Phloem	Zm00001d018938
Zm00001d014613	2.67729e-12	0.203028	0.385	0.229	1.50948e-07	Phloem	Zm00001d014613
Zm00001d035710	2.68804e-12	0.200053	0.234	0.114	1.51555e-07	Phloem	Zm00001d035710
Zm00001d016720	2.72811e-12	-0.28475	0.462	0.595	1.53814e-07	Phloem	Zm00001d016720
Zm00001d014945	2.78403e-12	0.108553	0.234	0.106	1.56966e-07	Phloem	Zm00001d014945
Zm00001d032822	2.84176e-12	-1.27071	0.2	0.367	1.60221e-07	Phloem	Zm00001d032822
Zm00001d023372	2.87514e-12	-0.260549	0.12	0.303	1.62103e-07	Phloem	Zm00001d023372
Zm00001d029263	2.87893e-12	0.211534	0.775	0.613	1.62317e-07	Phloem	Zm00001d029263
Zm00001d034733	2.89227e-12	-0.210042	0.08	0.244	1.63069e-07	Phloem	Zm00001d034733
Zm00001d039058	3.02022e-12	0.127936	0.308	0.161	1.70283e-07	Phloem	Zm00001d039058
Zm00001d040735	3.10147e-12	0.119336	0.397	0.222	1.74864e-07	Phloem	Zm00001d040735
Zm00001d032359	3.54235e-12	0.237421	0.877	0.818	1.99721e-07	Phloem	Zm00001d032359
Zm00001d026162	3.55038e-12	-0.556709	0.015	0.157	2.00174e-07	Phloem	Zm00001d026162
Zm00001d050618	3.87563e-12	0.162611	0.36	0.199	2.18512e-07	Phloem	Zm00001d050618
Zm00001d008210	3.90194e-12	-0.50474	0.197	0.356	2.19995e-07	Phloem	Zm00001d008210
Zm00001d044395	3.90786e-12	0.164973	0.418	0.247	2.20329e-07	Phloem	Zm00001d044395
Zm00001d029365	4.3079e-12	-0.404647	0.477	0.594	2.42884e-07	Phloem	Zm00001d029365
Zm00001d039011	4.39436e-12	-0.507562	0.308	0.467	2.47758e-07	Phloem	Zm00001d039011
Zm00001d032588	4.48824e-12	0.265093	0.825	0.746	2.53051e-07	Phloem	Zm00001d032588
Zm00001d031958	4.59813e-12	-0.15722	0.055	0.218	2.59247e-07	Phloem	Zm00001d031958
Zm00001d022017	4.62425e-12	-0.194898	0.068	0.226	2.6072e-07	Phloem	Zm00001d022017
Zm00001d018058	4.64122e-12	0.130613	0.323	0.176	2.61677e-07	Phloem	Zm00001d018058
Zm00001d003271	4.87867e-12	-0.200401	0.049	0.208	2.75064e-07	Phloem	Zm00001d003271
Zm00001d034380	5.111e-12	0.109204	0.375	0.214	2.88163e-07	Phloem	Zm00001d034380
Zm00001d013141	5.56898e-12	0.204422	0.652	0.476	3.13985e-07	Phloem	Zm00001d013141
Zm00001d004721	5.71995e-12	-0.692811	0.031	0.176	3.22496e-07	Phloem	Zm00001d004721
Zm00001d034793	5.89507e-12	0.22551	0.846	0.778	3.3237e-07	Phloem	Zm00001d034793
Zm00001d033855	6.10207e-12	-0.19831	0.138	0.32	3.44041e-07	Phloem	Zm00001d033855
Zm00001d016818	6.16357e-12	0.354083	0.44	0.266	3.47508e-07	Phloem	Zm00001d016818
Zm00001d012443	6.24313e-12	0.142565	0.274	0.142	3.51994e-07	Phloem	Zm00001d012443
Zm00001d050384	6.74219e-12	0.258536	0.834	0.787	3.80131e-07	Phloem	Zm00001d050384
Zm00001d010911	6.81669e-12	-0.430105	0.025	0.166	3.84332e-07	Phloem	Zm00001d010911
Zm00001d003159	6.87645e-12	0.290523	0.843	0.776	3.87701e-07	Phloem	Zm00001d003159
GRMZM5G800101	7.247e-12	0.196208	0.529	0.349	4.08593e-07	Phloem	GRMZM5G800101
Zm00001d016185	7.43013e-12	-0.270762	0.123	0.304	4.18918e-07	Phloem	Zm00001d016185
Zm00001d053220	7.47092e-12	-0.210097	0.055	0.206	4.21218e-07	Phloem	Zm00001d053220
Zm00001d051529	8.08078e-12	-0.165932	0.046	0.203	4.55603e-07	Phloem	Zm00001d051529
Zm00001d037633	8.37544e-12	0.293603	0.763	0.63	4.72216e-07	Phloem	Zm00001d037633
Zm00001d015431	9.24261e-12	0.218642	0.757	0.616	5.21107e-07	Phloem	Zm00001d015431
Zm00001d042665	1.01591e-11	-0.169232	0.083	0.247	5.72779e-07	Phloem	Zm00001d042665
Zm00001d051591	1.09335e-11	-0.790369	0.458	0.591	6.1644e-07	Phloem	Zm00001d051591
Zm00001d011971	1.10608e-11	0.109157	0.36	0.208	6.2362e-07	Phloem	Zm00001d011971
Zm00001d010855	1.10825e-11	0.322806	0.809	0.687	6.2484e-07	Phloem	Zm00001d010855
Zm00001d041679	1.11639e-11	0.116259	0.643	0.433	6.29432e-07	Phloem	Zm00001d041679
Zm00001d017009	1.11985e-11	0.18561	0.277	0.143	6.31381e-07	Phloem	Zm00001d017009
Zm00001d037096	1.21755e-11	0.16943	0.523	0.356	6.86468e-07	Phloem	Zm00001d037096
Zm00001d013966	1.34885e-11	0.188818	0.609	0.446	7.60493e-07	Phloem	Zm00001d013966
Zm00001d014428	1.36755e-11	0.230813	0.785	0.698	7.71041e-07	Phloem	Zm00001d014428
Zm00001d015138	1.38848e-11	-0.281981	0.065	0.218	7.82838e-07	Phloem	Zm00001d015138
Zm00001d011278	1.44416e-11	0.181883	0.905	0.859	8.14231e-07	Phloem	Zm00001d011278
Zm00001d005001	1.45375e-11	-0.253971	0.089	0.267	8.19639e-07	Phloem	Zm00001d005001
Zm00001d026390	1.45571e-11	0.12338	0.203	0.091	8.20742e-07	Phloem	Zm00001d026390
Zm00001d043898	1.45582e-11	-0.513219	0.071	0.222	8.20805e-07	Phloem	Zm00001d043898
Zm00001d026704	1.46782e-11	0.177239	0.538	0.362	8.27574e-07	Phloem	Zm00001d026704
Zm00001d029969	1.54799e-11	0.119968	0.286	0.154	8.72773e-07	Phloem	Zm00001d029969
Zm00001d030216	1.63393e-11	0.12984	0.262	0.133	9.21227e-07	Phloem	Zm00001d030216
Zm00001d042724	1.64275e-11	0.161115	0.514	0.332	9.26199e-07	Phloem	Zm00001d042724
Zm00001d012550	1.65022e-11	0.203883	0.711	0.545	9.30413e-07	Phloem	Zm00001d012550
Zm00001d025414	1.6621e-11	-0.207965	0.071	0.228	9.37109e-07	Phloem	Zm00001d025414
Zm00001d005695	1.73462e-11	0.259343	0.831	0.72	9.77995e-07	Phloem	Zm00001d005695
Zm00001d012675	1.7552e-11	0.304536	0.948	0.94	9.89599e-07	Phloem	Zm00001d012675
Zm00001d016997	1.81146e-11	-0.251462	0.089	0.262	1.02132e-06	Phloem	Zm00001d016997
Zm00001d033063	1.81461e-11	-0.293351	0.043	0.193	1.0231e-06	Phloem	Zm00001d033063
Zm00001d033999	1.83407e-11	-0.228735	0.175	0.35	1.03407e-06	Phloem	Zm00001d033999
Zm00001d007084	1.8585e-11	-0.509101	0.886	0.909	1.04784e-06	Phloem	Zm00001d007084
Zm00001d010814	1.92876e-11	0.264732	0.415	0.26	1.08746e-06	Phloem	Zm00001d010814
Zm00001d017485	1.93836e-11	-0.602542	0.08	0.236	1.09287e-06	Phloem	Zm00001d017485
Zm00001d050196	1.96111e-11	0.270098	0.726	0.557	1.10569e-06	Phloem	Zm00001d050196
Zm00001d028392	1.97251e-11	0.17701	0.738	0.547	1.11212e-06	Phloem	Zm00001d028392
Zm00001d047757	1.97926e-11	0.210485	0.929	0.893	1.11593e-06	Phloem	Zm00001d047757
Zm00001d000293	2.0326e-11	0.10229	0.308	0.16	1.146e-06	Phloem	Zm00001d000293
Zm00001d017095	2.04912e-11	-0.454304	0.052	0.202	1.15532e-06	Phloem	Zm00001d017095
Zm00001d025754	2.05085e-11	-0.45668	0.046	0.191	1.15629e-06	Phloem	Zm00001d025754
Zm00001d016756	2.06953e-11	0.130025	0.292	0.155	1.16682e-06	Phloem	Zm00001d016756
Zm00001d017700	2.1065e-11	0.126574	0.409	0.24	1.18767e-06	Phloem	Zm00001d017700
Zm00001d033531	2.10892e-11	0.274288	0.729	0.584	1.18903e-06	Phloem	Zm00001d033531
Zm00001d006808	2.11608e-11	0.177711	0.68	0.509	1.19307e-06	Phloem	Zm00001d006808
Zm00001d028709	2.12291e-11	0.26299	0.923	0.915	1.19692e-06	Phloem	Zm00001d028709
Zm00001d048585	2.14776e-11	0.191755	0.763	0.627	1.21093e-06	Phloem	Zm00001d048585
Zm00001d044516	2.15429e-11	0.224835	0.689	0.523	1.21461e-06	Phloem	Zm00001d044516
Zm00001d005177	2.23689e-11	0.134788	0.372	0.222	1.26118e-06	Phloem	Zm00001d005177
Zm00001d018277	2.24385e-11	0.188721	0.662	0.506	1.26511e-06	Phloem	Zm00001d018277
Zm00001d025772	2.2571e-11	0.238176	0.905	0.849	1.27258e-06	Phloem	Zm00001d025772
Zm00001d012142	2.2586e-11	0.155752	0.551	0.365	1.27342e-06	Phloem	Zm00001d012142
Zm00001d028560	2.28477e-11	0.167366	0.323	0.172	1.28817e-06	Phloem	Zm00001d028560
Zm00001d013461	2.29933e-11	-0.213778	0.046	0.196	1.29638e-06	Phloem	Zm00001d013461
Zm00001d008870	2.71551e-11	0.144126	0.569	0.389	1.53103e-06	Phloem	Zm00001d008870
Zm00001d008259	2.8267e-11	0.228702	0.886	0.841	1.59372e-06	Phloem	Zm00001d008259
Zm00001d035637	2.87365e-11	0.229011	0.766	0.616	1.62019e-06	Phloem	Zm00001d035637
Zm00001d010924	2.87913e-11	-0.217446	0.052	0.198	1.62328e-06	Phloem	Zm00001d010924
Zm00001d024982	2.90082e-11	-0.283218	0.062	0.222	1.63551e-06	Phloem	Zm00001d024982
Zm00001d012679	2.98306e-11	0.203047	0.763	0.63	1.68188e-06	Phloem	Zm00001d012679
Zm00001d008669	3.06016e-11	-0.700721	0.668	0.74	1.72535e-06	Phloem	Zm00001d008669
Zm00001d033902	3.12269e-11	-0.14426	0.046	0.198	1.7606e-06	Phloem	Zm00001d033902
Zm00001d010912	3.16644e-11	-0.16797	0.074	0.231	1.78527e-06	Phloem	Zm00001d010912
Zm00001d039653	3.18674e-11	0.234364	0.72	0.612	1.79671e-06	Phloem	Zm00001d039653
Zm00001d022629	3.2038e-11	0.187774	0.763	0.633	1.80633e-06	Phloem	Zm00001d022629
Zm00001d005789	3.37941e-11	-0.529404	0.4	0.546	1.90535e-06	Phloem	Zm00001d005789
Zm00001d050534	3.38389e-11	0.234398	0.695	0.539	1.90787e-06	Phloem	Zm00001d050534
Zm00001d009978	3.42925e-11	0.21469	0.751	0.614	1.93345e-06	Phloem	Zm00001d009978
Zm00001d008268	3.47565e-11	0.24157	0.665	0.501	1.95961e-06	Phloem	Zm00001d008268
Zm00001d049413	3.49092e-11	0.133418	0.292	0.157	1.96822e-06	Phloem	Zm00001d049413
Zm00001d010424	3.49832e-11	0.152327	0.194	0.087	1.97239e-06	Phloem	Zm00001d010424
Zm00001d041760	3.57636e-11	0.147784	0.988	0.987	2.01639e-06	Phloem	Zm00001d041760
Zm00001d019089	3.61756e-11	-0.154888	0.034	0.177	2.03962e-06	Phloem	Zm00001d019089
Zm00001d039297	3.70441e-11	-0.141958	0.058	0.21	2.08859e-06	Phloem	Zm00001d039297
Zm00001d050256	3.72594e-11	0.210409	0.785	0.666	2.10072e-06	Phloem	Zm00001d050256
Zm00001d007083	3.78848e-11	-0.22359	0.046	0.186	2.13598e-06	Phloem	Zm00001d007083
Zm00001d003730	3.86868e-11	-0.457269	0.397	0.558	2.1812e-06	Phloem	Zm00001d003730
Zm00001d021162	4.0239e-11	0.167602	0.618	0.443	2.26871e-06	Phloem	Zm00001d021162
Zm00001d033837	4.34109e-11	-0.142223	0.018	0.15	2.44755e-06	Phloem	Zm00001d033837
Zm00001d019750	4.45746e-11	-0.169445	0.071	0.222	2.51316e-06	Phloem	Zm00001d019750
Zm00001d003865	4.6538e-11	-0.17788	0.018	0.15	2.62386e-06	Phloem	Zm00001d003865
Zm00001d003725	4.68559e-11	-0.682517	0.415	0.542	2.64178e-06	Phloem	Zm00001d003725
Zm00001d027493	4.6962e-11	0.216983	0.662	0.51	2.64777e-06	Phloem	Zm00001d027493
Zm00001d006337	4.7397e-11	0.186672	0.609	0.453	2.67229e-06	Phloem	Zm00001d006337
Zm00001d044660	4.82024e-11	-0.33647	0.012	0.139	2.7177e-06	Phloem	Zm00001d044660
Zm00001d038598	4.8217e-11	-0.253462	0.052	0.197	2.71853e-06	Phloem	Zm00001d038598
Zm00001d022258	4.98981e-11	0.187339	0.6	0.391	2.8133e-06	Phloem	Zm00001d022258
Zm00001d010825	5.05934e-11	-0.149657	0.028	0.167	2.85251e-06	Phloem	Zm00001d010825
Zm00001d023830	5.08999e-11	0.184833	0.471	0.307	2.86979e-06	Phloem	Zm00001d023830
Zm00001d011208	5.10682e-11	0.193564	0.757	0.584	2.87928e-06	Phloem	Zm00001d011208
Zm00001d011642	5.34434e-11	-0.37876	0.366	0.54	3.0132e-06	Phloem	Zm00001d011642
Zm00001d044950	5.38304e-11	0.177482	0.422	0.269	3.03501e-06	Phloem	Zm00001d044950
Zm00001d005315	5.56756e-11	0.262106	0.594	0.445	3.13904e-06	Phloem	Zm00001d005315
Zm00001d050201	5.57014e-11	-0.458682	0.071	0.22	3.1405e-06	Phloem	Zm00001d050201
Zm00001d022416	5.62911e-11	0.312045	0.603	0.446	3.17375e-06	Phloem	Zm00001d022416
Zm00001d022354	5.65916e-11	0.246372	0.849	0.794	3.19069e-06	Phloem	Zm00001d022354
Zm00001d034855	5.75294e-11	0.189733	0.92	0.856	3.24357e-06	Phloem	Zm00001d034855
Zm00001d013911	5.77214e-11	0.106793	0.542	0.349	3.25439e-06	Phloem	Zm00001d013911
Zm00001d022077	5.85929e-11	0.125921	0.369	0.216	3.30352e-06	Phloem	Zm00001d022077
Zm00001d034017	5.85994e-11	-0.268515	0.357	0.498	3.30389e-06	Phloem	Zm00001d034017
Zm00001d046330	5.97796e-11	0.151654	0.434	0.26	3.37043e-06	Phloem	Zm00001d046330
Zm00001d032157	6.11191e-11	0.114388	0.437	0.277	3.44595e-06	Phloem	Zm00001d032157
Zm00001d033187	6.30837e-11	-0.229802	0.055	0.202	3.55672e-06	Phloem	Zm00001d033187
Zm00001d006119	6.402e-11	0.167512	0.588	0.42	3.60951e-06	Phloem	Zm00001d006119
Zm00001d047753	6.41108e-11	0.197144	0.622	0.46	3.61463e-06	Phloem	Zm00001d047753
Zm00001d033979	6.52569e-11	0.188761	0.763	0.633	3.67925e-06	Phloem	Zm00001d033979
Zm00001d047087	6.84706e-11	0.150133	0.634	0.431	3.86044e-06	Phloem	Zm00001d047087
Zm00001d005675	6.90726e-11	0.195625	0.889	0.822	3.89438e-06	Phloem	Zm00001d005675
Zm00001d031520	6.9885e-11	0.104326	0.483	0.308	3.94019e-06	Phloem	Zm00001d031520
Zm00001d036091	7.13058e-11	0.123653	0.502	0.326	4.02029e-06	Phloem	Zm00001d036091
Zm00001d021536	7.28439e-11	0.205437	0.846	0.75	4.10701e-06	Phloem	Zm00001d021536
Zm00001d017704	7.28471e-11	0.156844	0.606	0.434	4.10719e-06	Phloem	Zm00001d017704
Zm00001d033457	7.3612e-11	-0.260723	0.022	0.152	4.15032e-06	Phloem	Zm00001d033457
Zm00001d002969	7.37925e-11	0.109659	0.468	0.294	4.1605e-06	Phloem	Zm00001d002969
Zm00001d046226	7.45894e-11	-0.181951	0.055	0.201	4.20542e-06	Phloem	Zm00001d046226
Zm00001d022327	7.5204e-11	0.203614	0.56	0.376	4.24008e-06	Phloem	Zm00001d022327
Zm00001d022009	7.56313e-11	-0.243311	0.04	0.176	4.26417e-06	Phloem	Zm00001d022009
Zm00001d010650	7.67892e-11	0.300645	0.643	0.524	4.32945e-06	Phloem	Zm00001d010650
Zm00001d018781	7.71743e-11	-0.130294	0.006	0.127	4.35116e-06	Phloem	Zm00001d018781
Zm00001d028002	7.92738e-11	0.152613	0.631	0.433	4.46954e-06	Phloem	Zm00001d028002
Zm00001d012010	8.11351e-11	0.121609	0.329	0.19	4.57448e-06	Phloem	Zm00001d012010
Zm00001d002159	8.28234e-11	0.191995	0.48	0.319	4.66967e-06	Phloem	Zm00001d002159
Zm00001d016787	8.31892e-11	0.219126	0.782	0.66	4.69029e-06	Phloem	Zm00001d016787
Zm00001d027449	8.67574e-11	-0.289132	0.098	0.247	4.89147e-06	Phloem	Zm00001d027449
Zm00001d029963	9.00671e-11	-0.145121	0.037	0.178	5.07808e-06	Phloem	Zm00001d029963
Zm00001d052450	9.01302e-11	-0.333617	0.172	0.345	5.08163e-06	Phloem	Zm00001d052450
Zm00001d039079	9.13889e-11	-0.254896	0.775	0.806	5.1526e-06	Phloem	Zm00001d039079
Zm00001d001862	9.69753e-11	0.237233	0.588	0.435	5.46757e-06	Phloem	Zm00001d001862
Zm00001d002523	9.7146e-11	0.17487	0.582	0.417	5.47719e-06	Phloem	Zm00001d002523
Zm00001d005023	9.95899e-11	0.233134	0.88	0.798	5.61498e-06	Phloem	Zm00001d005023
Zm00001d037052	1.04136e-10	0.221684	0.751	0.646	5.87128e-06	Phloem	Zm00001d037052
Zm00001d038555	1.0874e-10	-0.353026	0.452	0.539	6.1309e-06	Phloem	Zm00001d038555
Zm00001d018322	1.08948e-10	0.148958	0.443	0.283	6.14259e-06	Phloem	Zm00001d018322
Zm00001d025590	1.12905e-10	-0.292033	0.252	0.412	6.36572e-06	Phloem	Zm00001d025590
Zm00001d043205	1.17034e-10	0.22127	0.646	0.496	6.59848e-06	Phloem	Zm00001d043205
Zm00001d025018	1.20366e-10	-0.26993	0.022	0.15	6.78636e-06	Phloem	Zm00001d025018
Zm00001d020400	1.21441e-10	-0.368821	0.058	0.2	6.84694e-06	Phloem	Zm00001d020400
Zm00001d002158	1.28204e-10	0.202334	0.455	0.291	7.22825e-06	Phloem	Zm00001d002158
Zm00001d027756	1.38191e-10	0.1882	0.634	0.476	7.79135e-06	Phloem	Zm00001d027756
Zm00001d018826	1.51552e-10	0.146162	0.594	0.41	8.54466e-06	Phloem	Zm00001d018826
Zm00001d049265	1.54243e-10	-0.216657	0.065	0.217	8.69636e-06	Phloem	Zm00001d049265
Zm00001d028775	1.5432e-10	-0.257107	0.182	0.327	8.70074e-06	Phloem	Zm00001d028775
Zm00001d024178	1.5485e-10	-0.223023	0.031	0.167	8.73061e-06	Phloem	Zm00001d024178
Zm00001d005970	1.55031e-10	0.109547	0.298	0.167	8.74079e-06	Phloem	Zm00001d005970
Zm00001d018571	1.59039e-10	-0.125702	0.055	0.198	8.9668e-06	Phloem	Zm00001d018571
Zm00001d029102	1.59408e-10	-0.131405	0.034	0.168	8.98758e-06	Phloem	Zm00001d029102
Zm00001d009000	1.65302e-10	0.166504	0.96	0.939	9.31991e-06	Phloem	Zm00001d009000
Zm00001d042968	1.67389e-10	0.141993	0.597	0.416	9.43757e-06	Phloem	Zm00001d042968
Zm00001d006605	1.67792e-10	0.109844	0.394	0.231	9.46027e-06	Phloem	Zm00001d006605
Zm00001d028400	1.69102e-10	-0.276581	0.249	0.401	9.53414e-06	Phloem	Zm00001d028400
Zm00001d053394	1.71606e-10	-0.146237	0.046	0.185	9.67531e-06	Phloem	Zm00001d053394
Zm00001d002339	1.71885e-10	0.169133	0.975	0.967	9.69102e-06	Phloem	Zm00001d002339
Zm00001d012321	1.75644e-10	0.127252	0.394	0.239	9.903e-06	Phloem	Zm00001d012321
Zm00001d027079	1.82951e-10	-0.212761	0.098	0.253	1.0315e-05	Phloem	Zm00001d027079
Zm00001d038192	1.84218e-10	-0.212736	0.074	0.228	1.03864e-05	Phloem	Zm00001d038192
Zm00001d013786	1.85398e-10	-0.208161	0.12	0.273	1.04529e-05	Phloem	Zm00001d013786
Zm00001d018452	1.8938e-10	0.131107	0.582	0.407	1.06774e-05	Phloem	Zm00001d018452
Zm00001d022160	1.90565e-10	0.147833	0.674	0.508	1.07443e-05	Phloem	Zm00001d022160
Zm00001d021652	1.94131e-10	0.165235	0.96	0.941	1.09453e-05	Phloem	Zm00001d021652
Zm00001d051121	1.94881e-10	0.110273	0.351	0.203	1.09876e-05	Phloem	Zm00001d051121
Zm00001d024939	1.96266e-10	-0.219124	0.028	0.156	1.10657e-05	Phloem	Zm00001d024939
Zm00001d044434	2.00398e-10	0.129697	0.532	0.353	1.12987e-05	Phloem	Zm00001d044434
Zm00001d045390	2.0451e-10	0.240696	0.705	0.527	1.15305e-05	Phloem	Zm00001d045390
Zm00001d046234	2.0634e-10	-0.263465	0.132	0.287	1.16336e-05	Phloem	Zm00001d046234
Zm00001d021959	2.09511e-10	-0.253694	0.052	0.188	1.18124e-05	Phloem	Zm00001d021959
Zm00001d012537	2.13079e-10	0.205962	0.852	0.771	1.20136e-05	Phloem	Zm00001d012537
Zm00001d047812	2.4166e-10	0.172623	0.646	0.472	1.3625e-05	Phloem	Zm00001d047812
Zm00001d039626	2.43873e-10	0.115022	0.286	0.156	1.37498e-05	Phloem	Zm00001d039626
Zm00001d032823	2.4861e-10	-0.315903	0.015	0.136	1.40169e-05	Phloem	Zm00001d032823
Zm00001d034479	2.54297e-10	-0.301152	0.898	0.907	1.43375e-05	Phloem	Zm00001d034479
Zm00001d043929	2.65658e-10	0.117068	0.535	0.351	1.49781e-05	Phloem	Zm00001d043929
Zm00001d048294	2.66255e-10	0.134671	0.222	0.11	1.50117e-05	Phloem	Zm00001d048294
Zm00001d031627	2.71776e-10	0.194785	0.92	0.878	1.5323e-05	Phloem	Zm00001d031627
Zm00001d027288	2.72305e-10	-0.273925	0.723	0.786	1.53528e-05	Phloem	Zm00001d027288
Zm00001d033044	2.73094e-10	-0.306907	0.126	0.279	1.53973e-05	Phloem	Zm00001d033044
Zm00001d043070	2.83815e-10	0.194273	0.822	0.677	1.60018e-05	Phloem	Zm00001d043070
Zm00001d022041	2.91392e-10	0.10321	0.308	0.17	1.6429e-05	Phloem	Zm00001d022041
Zm00001d020958	2.93724e-10	-0.959715	0.126	0.261	1.65605e-05	Phloem	Zm00001d020958
Zm00001d037097	3.05187e-10	-0.152045	0.009	0.127	1.72067e-05	Phloem	Zm00001d037097
Zm00001d021422	3.066e-10	-0.618262	0.683	0.696	1.72864e-05	Phloem	Zm00001d021422
Zm00001d052104	3.06695e-10	-0.14524	0.009	0.125	1.72918e-05	Phloem	Zm00001d052104
Zm00001d031258	3.10389e-10	0.156101	0.48	0.311	1.75001e-05	Phloem	Zm00001d031258
Zm00001d035447	3.13404e-10	-0.130348	0.043	0.177	1.767e-05	Phloem	Zm00001d035447
Zm00001d038688	3.14963e-10	0.104483	0.258	0.132	1.77579e-05	Phloem	Zm00001d038688
Zm00001d016491	3.24072e-10	0.224524	0.852	0.794	1.82715e-05	Phloem	Zm00001d016491
Zm00001d006421	3.31854e-10	0.196	0.785	0.668	1.87103e-05	Phloem	Zm00001d006421
Zm00001d018668	3.34977e-10	0.241881	0.818	0.703	1.88864e-05	Phloem	Zm00001d018668
Zm00001d028584	3.39227e-10	-0.173818	0.003	0.114	1.9126e-05	Phloem	Zm00001d028584
Zm00001d037499	3.44726e-10	0.139131	0.505	0.344	1.9436e-05	Phloem	Zm00001d037499
Zm00001d047638	3.46118e-10	-0.144679	0.031	0.157	1.95145e-05	Phloem	Zm00001d047638
Zm00001d050277	3.50452e-10	-0.190372	0.034	0.167	1.97588e-05	Phloem	Zm00001d050277
Zm00001d022487	3.51804e-10	0.144644	0.631	0.445	1.98351e-05	Phloem	Zm00001d022487
Zm00001d039883	3.63776e-10	0.102767	0.363	0.209	2.051e-05	Phloem	Zm00001d039883
Zm00001d052209	3.67653e-10	-0.27434	0.129	0.287	2.07287e-05	Phloem	Zm00001d052209
Zm00001d029968	3.70336e-10	0.161021	0.997	0.993	2.08799e-05	Phloem	Zm00001d029968
Zm00001d018627	3.73698e-10	-0.348506	0.123	0.275	2.10695e-05	Phloem	Zm00001d018627
Zm00001d032620	3.75914e-10	0.207768	0.535	0.368	2.11944e-05	Phloem	Zm00001d032620
Zm00001d035770	3.77036e-10	0.247047	0.874	0.803	2.12577e-05	Phloem	Zm00001d035770
Zm00001d048547	3.79694e-10	0.106536	0.351	0.201	2.14076e-05	Phloem	Zm00001d048547
Zm00001d003653	4.03429e-10	0.230783	0.895	0.834	2.27458e-05	Phloem	Zm00001d003653
Zm00001d050935	4.13213e-10	0.130207	0.517	0.361	2.32974e-05	Phloem	Zm00001d050935
Zm00001d029529	4.14374e-10	-0.22646	0.188	0.326	2.33628e-05	Phloem	Zm00001d029529
Zm00001d037483	4.22639e-10	0.17281	0.738	0.583	2.38288e-05	Phloem	Zm00001d037483
Zm00001d047942	4.33735e-10	0.118494	0.283	0.152	2.44544e-05	Phloem	Zm00001d047942
Zm00001d020609	4.3436e-10	0.100027	0.412	0.249	2.44896e-05	Phloem	Zm00001d020609
Zm00001d031127	4.45265e-10	0.190729	0.612	0.446	2.51045e-05	Phloem	Zm00001d031127
Zm00001d046005	4.54549e-10	0.143493	0.495	0.322	2.56279e-05	Phloem	Zm00001d046005
Zm00001d015133	4.57113e-10	-0.226785	0.083	0.237	2.57725e-05	Phloem	Zm00001d015133
Zm00001d028458	4.61542e-10	0.131891	0.48	0.317	2.60222e-05	Phloem	Zm00001d028458
Zm00001d049598	4.61578e-10	0.118164	0.495	0.327	2.60242e-05	Phloem	Zm00001d049598
Zm00001d040294	4.88493e-10	0.186688	0.797	0.713	2.75417e-05	Phloem	Zm00001d040294
Zm00001d023280	4.99802e-10	-0.60678	0.018	0.136	2.81793e-05	Phloem	Zm00001d023280
Zm00001d011735	5.07068e-10	-0.286956	0.043	0.172	2.8589e-05	Phloem	Zm00001d011735
Zm00001d022460	5.12798e-10	-0.170106	0.108	0.261	2.8912e-05	Phloem	Zm00001d022460
Zm00001d015852	5.18407e-10	-0.530457	0.289	0.417	2.92283e-05	Phloem	Zm00001d015852
Zm00001d006547	5.29789e-10	-0.38004	0.926	0.9	2.987e-05	Phloem	Zm00001d006547
Zm00001d015306	5.36049e-10	0.102464	0.345	0.203	3.0223e-05	Phloem	Zm00001d015306
Zm00001d009797	5.55325e-10	-0.319716	0.126	0.265	3.13098e-05	Phloem	Zm00001d009797
Zm00001d005753	5.59778e-10	0.139896	0.412	0.26	3.15609e-05	Phloem	Zm00001d005753
Zm00001d053556	5.64883e-10	0.20049	0.791	0.648	3.18487e-05	Phloem	Zm00001d053556
Zm00001d020780	5.69723e-10	-0.235199	0.022	0.141	3.21216e-05	Phloem	Zm00001d020780
Zm00001d014007	5.81959e-10	0.124884	0.382	0.23	3.28114e-05	Phloem	Zm00001d014007
Zm00001d053684	6.02996e-10	-0.28806	0.108	0.266	3.39975e-05	Phloem	Zm00001d053684
Zm00001d039091	6.05859e-10	0.178185	0.948	0.881	3.4159e-05	Phloem	Zm00001d039091
Zm00001d008916	6.13798e-10	0.202705	0.822	0.719	3.46065e-05	Phloem	Zm00001d008916
Zm00001d043565	6.15799e-10	0.158871	0.631	0.462	3.47194e-05	Phloem	Zm00001d043565
Zm00001d025660	6.28236e-10	0.128999	0.458	0.294	3.54206e-05	Phloem	Zm00001d025660
Zm00001d038280	6.40542e-10	0.102564	0.308	0.172	3.61144e-05	Phloem	Zm00001d038280
Zm00001d036787	6.45443e-10	0.145371	0.394	0.24	3.63907e-05	Phloem	Zm00001d036787
Zm00001d036293	6.58242e-10	0.167791	0.825	0.69	3.71123e-05	Phloem	Zm00001d036293
Zm00001d025951	6.65981e-10	0.115308	0.551	0.362	3.75487e-05	Phloem	Zm00001d025951
Zm00001d040389	7.54086e-10	0.188578	0.846	0.737	4.25161e-05	Phloem	Zm00001d040389
Zm00001d049982	7.54596e-10	0.152907	0.723	0.569	4.25449e-05	Phloem	Zm00001d049982
Zm00001d002326	7.67624e-10	-0.208201	0.04	0.173	4.32794e-05	Phloem	Zm00001d002326
Zm00001d002126	7.84875e-10	0.130324	0.397	0.239	4.4252e-05	Phloem	Zm00001d002126
Zm00001d050915	7.92589e-10	0.169449	0.523	0.37	4.4687e-05	Phloem	Zm00001d050915
Zm00001d043590	7.96608e-10	-0.251088	0.065	0.208	4.49135e-05	Phloem	Zm00001d043590
Zm00001d025057	8.09926e-10	-0.155708	0.031	0.156	4.56644e-05	Phloem	Zm00001d025057
Zm00001d018867	8.36264e-10	0.140168	0.535	0.364	4.71494e-05	Phloem	Zm00001d018867
Zm00001d022995	8.3964e-10	0.178345	0.637	0.467	4.73398e-05	Phloem	Zm00001d022995
Zm00001d032695	8.42772e-10	0.168231	0.966	0.923	4.75163e-05	Phloem	Zm00001d032695
Zm00001d038873	8.68352e-10	0.195109	0.209	0.104	4.89585e-05	Phloem	Zm00001d038873
Zm00001d031555	8.70038e-10	0.144547	0.532	0.367	4.90536e-05	Phloem	Zm00001d031555
Zm00001d047787	8.7227e-10	-0.471797	0.815	0.814	4.91795e-05	Phloem	Zm00001d047787
Zm00001d006493	8.87539e-10	-0.299226	0.083	0.223	5.00403e-05	Phloem	Zm00001d006493
Zm00001d025141	9.36791e-10	-0.197026	0.132	0.279	5.28172e-05	Phloem	Zm00001d025141
Zm00001d032560	9.62638e-10	0.166391	0.655	0.475	5.42745e-05	Phloem	Zm00001d032560
Zm00001d044121	9.66405e-10	-0.297999	0.249	0.405	5.44869e-05	Phloem	Zm00001d044121
Zm00001d029324	9.68479e-10	-0.162603	0.16	0.333	5.46038e-05	Phloem	Zm00001d029324
Zm00001d015905	9.73677e-10	0.140287	0.311	0.175	5.48969e-05	Phloem	Zm00001d015905
Zm00001d018884	9.75938e-10	0.180454	0.828	0.717	5.50244e-05	Phloem	Zm00001d018884
Zm00001d039636	9.85804e-10	-0.186817	0.015	0.13	5.55806e-05	Phloem	Zm00001d039636
Zm00001d034893	1.00346e-09	0.198361	0.723	0.593	5.6576e-05	Phloem	Zm00001d034893
Zm00001d044035	1.01148e-09	-0.237204	0.803	0.818	5.7028e-05	Phloem	Zm00001d044035
Zm00001d018001	1.06161e-09	-0.149197	0.089	0.239	5.98548e-05	Phloem	Zm00001d018001
Zm00001d045632	1.10875e-09	-0.224181	0.138	0.282	6.25126e-05	Phloem	Zm00001d045632
Zm00001d039790	1.11699e-09	-0.559729	0.298	0.435	6.2977e-05	Phloem	Zm00001d039790
Zm00001d013549	1.12803e-09	0.108012	0.548	0.372	6.35995e-05	Phloem	Zm00001d013549
Zm00001d002252	1.14047e-09	-0.151907	0.058	0.197	6.43011e-05	Phloem	Zm00001d002252
Zm00001d016566	1.15091e-09	0.134165	0.557	0.402	6.48897e-05	Phloem	Zm00001d016566
Zm00001d034072	1.17161e-09	0.211459	0.612	0.442	6.60564e-05	Phloem	Zm00001d034072
Zm00001d006329	1.17609e-09	0.210198	0.729	0.601	6.63092e-05	Phloem	Zm00001d006329
Zm00001d021599	1.18486e-09	-0.175902	0.055	0.195	6.68037e-05	Phloem	Zm00001d021599
Zm00001d042443	1.20201e-09	-0.113313	0.037	0.162	6.77703e-05	Phloem	Zm00001d042443
Zm00001d014814	1.20622e-09	-0.185462	0.049	0.18	6.80082e-05	Phloem	Zm00001d014814
Zm00001d004921	1.20917e-09	-0.180657	0.049	0.179	6.8174e-05	Phloem	Zm00001d004921
Zm00001d048204	1.25646e-09	0.186905	0.871	0.802	7.08403e-05	Phloem	Zm00001d048204
Zm00001d053375	1.29454e-09	0.102686	0.535	0.362	7.29872e-05	Phloem	Zm00001d053375
Zm00001d014772	1.35524e-09	0.188079	0.895	0.825	7.641e-05	Phloem	Zm00001d014772
Zm00001d002549	1.36229e-09	0.195238	0.483	0.332	7.68075e-05	Phloem	Zm00001d002549
Zm00001d035915	1.37893e-09	0.160053	0.837	0.741	7.77456e-05	Phloem	Zm00001d035915
Zm00001d046778	1.39909e-09	0.125969	0.431	0.269	7.88818e-05	Phloem	Zm00001d046778
Zm00001d011228	1.40638e-09	-0.153209	0.031	0.149	7.9293e-05	Phloem	Zm00001d011228
Zm00001d018981	1.44437e-09	-0.314899	0.837	0.838	8.14349e-05	Phloem	Zm00001d018981
Zm00001d042179	1.45811e-09	-0.38878	0.058	0.186	8.22096e-05	Phloem	Zm00001d042179
Zm00001d041963	1.49504e-09	-0.307953	0.886	0.845	8.42921e-05	Phloem	Zm00001d041963
Zm00001d038508	1.50982e-09	0.218941	0.88	0.823	8.5125e-05	Phloem	Zm00001d038508
Zm00001d026586	1.5333e-09	-0.109875	0.025	0.144	8.64488e-05	Phloem	Zm00001d026586
Zm00001d021781	1.6209e-09	-0.122584	0.009	0.118	9.13882e-05	Phloem	Zm00001d021781
Zm00001d022316	1.64508e-09	0.169419	0.797	0.691	9.27514e-05	Phloem	Zm00001d022316
Zm00001d035054	1.65352e-09	0.221751	0.652	0.517	9.32269e-05	Phloem	Zm00001d035054
Zm00001d043367	1.6901e-09	0.130703	0.434	0.278	9.52897e-05	Phloem	Zm00001d043367
Zm00001d027888	1.70169e-09	-0.125527	0.025	0.144	9.59431e-05	Phloem	Zm00001d027888
Zm00001d029932	1.70619e-09	-0.137	0.022	0.136	9.6197e-05	Phloem	Zm00001d029932
Zm00001d005208	1.77256e-09	-0.325695	0.258	0.39	9.99388e-05	Phloem	Zm00001d005208
Zm00001d028750	1.78624e-09	-0.150184	0.015	0.126	0.00010071	Phloem	Zm00001d028750
Zm00001d024940	1.80168e-09	-0.211945	0.142	0.286	0.000101581	Phloem	Zm00001d024940
Zm00001d016166	1.81383e-09	-0.376181	0.72	0.747	0.000102266	Phloem	Zm00001d016166
Zm00001d017508	1.8663e-09	-0.576074	0.015	0.127	0.000105224	Phloem	Zm00001d017508
Zm00001d042102	1.87352e-09	-0.161727	0.065	0.196	0.000105631	Phloem	Zm00001d042102
Zm00001d039648	1.88224e-09	0.143768	0.175	0.08	0.000106122	Phloem	Zm00001d039648
Zm00001d023437	1.88786e-09	-0.203364	0.188	0.345	0.00010644	Phloem	Zm00001d023437
Zm00001d038594	1.89045e-09	0.187998	0.871	0.802	0.000106585	Phloem	Zm00001d038594
Zm00001d017186	1.89564e-09	-0.471171	0.572	0.606	0.000106878	Phloem	Zm00001d017186
Zm00001d035948	1.97278e-09	0.199294	0.926	0.867	0.000111227	Phloem	Zm00001d035948
Zm00001d044076	2.04304e-09	0.111574	0.243	0.126	0.000115189	Phloem	Zm00001d044076
Zm00001d042600	2.09443e-09	0.14838	0.655	0.487	0.000118086	Phloem	Zm00001d042600
Zm00001d046552	2.10932e-09	0.155215	0.545	0.388	0.000118926	Phloem	Zm00001d046552
Zm00001d017951	2.19994e-09	-0.51107	0.351	0.468	0.000124035	Phloem	Zm00001d017951
Zm00001d019221	2.21493e-09	0.13731	0.477	0.309	0.00012488	Phloem	Zm00001d019221
Zm00001d031657	2.26973e-09	-0.224884	0.132	0.287	0.00012797	Phloem	Zm00001d031657
Zm00001d009957	2.36302e-09	-0.315189	0.015	0.126	0.000133229	Phloem	Zm00001d009957
Zm00001d051995	2.36442e-09	-0.329768	0.203	0.372	0.000133308	Phloem	Zm00001d051995
Zm00001d033241	2.41826e-09	-0.157497	0.003	0.105	0.000136344	Phloem	Zm00001d033241
Zm00001d043971	2.43076e-09	0.178975	0.735	0.593	0.000137048	Phloem	Zm00001d043971
Zm00001d005649	2.4892e-09	0.120844	0.886	0.768	0.000140343	Phloem	Zm00001d005649
Zm00001d052718	2.49423e-09	0.187506	0.957	0.957	0.000140627	Phloem	Zm00001d052718
Zm00001d003485	2.53106e-09	0.130577	0.351	0.212	0.000142704	Phloem	Zm00001d003485
Zm00001d020544	2.53601e-09	-0.187849	0.182	0.353	0.000142983	Phloem	Zm00001d020544
Zm00001d049691	2.54196e-09	0.163392	0.738	0.607	0.000143318	Phloem	Zm00001d049691
Zm00001d028375	2.74521e-09	0.181403	0.794	0.68	0.000154778	Phloem	Zm00001d028375
Zm00001d051468	2.75977e-09	0.11367	0.215	0.11	0.000155598	Phloem	Zm00001d051468
Zm00001d046136	2.81125e-09	0.130972	0.56	0.386	0.000158501	Phloem	Zm00001d046136
Zm00001d050917	2.83277e-09	0.113898	0.532	0.367	0.000159715	Phloem	Zm00001d050917
Zm00001d045268	2.83408e-09	-0.526321	0.923	0.897	0.000159788	Phloem	Zm00001d045268
Zm00001d021128	2.87747e-09	0.146138	0.591	0.436	0.000162234	Phloem	Zm00001d021128
Zm00001d046120	2.9104e-09	0.197365	0.557	0.41	0.000164091	Phloem	Zm00001d046120
Zm00001d014818	2.93386e-09	0.144273	0.391	0.24	0.000165414	Phloem	Zm00001d014818
Zm00001d003861	3.04374e-09	-0.135552	0.012	0.119	0.000171609	Phloem	Zm00001d003861
Zm00001d052108	3.07178e-09	0.191562	0.858	0.776	0.00017319	Phloem	Zm00001d052108
Zm00001d034107	3.07223e-09	-0.136051	0.009	0.114	0.000173215	Phloem	Zm00001d034107
Zm00001d045206	3.09251e-09	0.135766	0.612	0.435	0.000174359	Phloem	Zm00001d045206
Zm00001d026251	3.18071e-09	-0.247637	0.04	0.166	0.000179331	Phloem	Zm00001d026251
Zm00001d045519	3.20695e-09	-0.128692	0.062	0.194	0.000180811	Phloem	Zm00001d045519
Zm00001d038810	3.24252e-09	0.141858	0.28	0.159	0.000182816	Phloem	Zm00001d038810
Zm00001d015195	3.32888e-09	0.100025	0.523	0.354	0.000187686	Phloem	Zm00001d015195
Zm00001d037632	3.49883e-09	0.264499	0.572	0.43	0.000197268	Phloem	Zm00001d037632
Zm00001d045305	3.56296e-09	0.104478	0.582	0.393	0.000200883	Phloem	Zm00001d045305
Zm00001d033262	3.5842e-09	0.125625	0.465	0.3	0.000202081	Phloem	Zm00001d033262
Zm00001d025081	3.5916e-09	0.192238	0.455	0.301	0.000202498	Phloem	Zm00001d025081
Zm00001d048054	3.94595e-09	0.120581	0.394	0.245	0.000222477	Phloem	Zm00001d048054
Zm00001d021018	3.94769e-09	0.194	0.917	0.904	0.000222575	Phloem	Zm00001d021018
Zm00001d040003	3.98374e-09	-0.127362	0.018	0.128	0.000224607	Phloem	Zm00001d040003
Zm00001d023939	4.10463e-09	-0.158319	0.04	0.16	0.000231423	Phloem	Zm00001d023939
Zm00001d021935	4.20629e-09	-0.165641	0.065	0.194	0.000237155	Phloem	Zm00001d021935
Zm00001d021236	4.22898e-09	-0.137182	0.022	0.133	0.000238434	Phloem	Zm00001d021236
Zm00001d045194	4.23323e-09	0.174036	0.68	0.524	0.000238674	Phloem	Zm00001d045194
Zm00001d025517	4.23609e-09	0.125974	0.56	0.396	0.000238835	Phloem	Zm00001d025517
Zm00001d027267	4.25328e-09	0.101625	0.157	0.069	0.000239804	Phloem	Zm00001d027267
Zm00001d039771	4.33784e-09	0.121993	0.32	0.189	0.000244572	Phloem	Zm00001d039771
Zm00001d002898	4.40316e-09	-0.264318	0.077	0.212	0.000248254	Phloem	Zm00001d002898
Zm00001d004729	4.40701e-09	-0.522479	0.046	0.169	0.000248472	Phloem	Zm00001d004729
Zm00001d031825	4.43337e-09	0.13293	0.96	0.906	0.000249958	Phloem	Zm00001d031825
Zm00001d006221	4.45644e-09	-0.231142	0.237	0.377	0.000251259	Phloem	Zm00001d006221
Zm00001d027966	4.47596e-09	0.119601	0.6	0.433	0.000252359	Phloem	Zm00001d027966
Zm00001d010793	4.4802e-09	-0.167851	0.089	0.224	0.000252598	Phloem	Zm00001d010793
Zm00001d027447	4.5538e-09	0.106077	0.295	0.168	0.000256748	Phloem	Zm00001d027447
Zm00001d034112	4.6105e-09	0.116865	0.551	0.382	0.000259944	Phloem	Zm00001d034112
Zm00001d051422	4.70857e-09	0.136475	0.646	0.479	0.000265474	Phloem	Zm00001d051422
Zm00001d021019	4.71706e-09	0.1481	0.492	0.338	0.000265953	Phloem	Zm00001d021019
Zm00001d029628	4.71979e-09	0.169331	0.502	0.339	0.000266107	Phloem	Zm00001d029628
Zm00001d048307	4.75417e-09	0.20633	0.643	0.482	0.000268045	Phloem	Zm00001d048307
Zm00001d038535	4.80682e-09	0.163558	0.982	0.978	0.000271013	Phloem	Zm00001d038535
Zm00001d017601	4.84859e-09	0.191468	0.837	0.716	0.000273368	Phloem	Zm00001d017601
Zm00001d026657	5.10793e-09	-0.22776	0.108	0.236	0.00028799	Phloem	Zm00001d026657
Zm00001d012931	5.20187e-09	0.110087	0.394	0.247	0.000293287	Phloem	Zm00001d012931
Zm00001d020364	5.31172e-09	0.15923	0.594	0.42	0.00029948	Phloem	Zm00001d020364
Zm00001d029238	5.33362e-09	-0.51593	0.56	0.58	0.000300715	Phloem	Zm00001d029238
Zm00001d014417	5.48122e-09	0.177912	0.865	0.796	0.000309037	Phloem	Zm00001d014417
Zm00001d038151	5.49756e-09	-0.13579	0.058	0.179	0.000309958	Phloem	Zm00001d038151
Zm00001d009578	5.63062e-09	-0.131519	0.095	0.231	0.00031746	Phloem	Zm00001d009578
Zm00001d028249	5.63266e-09	-0.335796	0.222	0.352	0.000317575	Phloem	Zm00001d028249
Zm00001d012850	5.65412e-09	0.136105	0.289	0.164	0.000318785	Phloem	Zm00001d012850
Zm00001d045351	5.66806e-09	0.189313	0.702	0.582	0.000319571	Phloem	Zm00001d045351
Zm00001d014101	5.69662e-09	-0.231344	0.025	0.135	0.000321181	Phloem	Zm00001d014101
Zm00001d002964	5.71335e-09	-0.159841	0.077	0.216	0.000322125	Phloem	Zm00001d002964
Zm00001d038866	5.71839e-09	0.187933	0.6	0.454	0.000322409	Phloem	Zm00001d038866
Zm00001d038262	5.7294e-09	0.141352	0.523	0.365	0.000323029	Phloem	Zm00001d038262
Zm00001d053445	5.82041e-09	0.141738	0.36	0.222	0.000328161	Phloem	Zm00001d053445
Zm00001d034188	6.1694e-09	-0.348611	0.643	0.649	0.000347837	Phloem	Zm00001d034188
Zm00001d020536	6.33504e-09	-0.118366	0.012	0.117	0.000357176	Phloem	Zm00001d020536
Zm00001d028955	6.43635e-09	0.124716	0.458	0.296	0.000362888	Phloem	Zm00001d028955
Zm00001d037413	6.50569e-09	0.159101	0.711	0.559	0.000366797	Phloem	Zm00001d037413
Zm00001d049881	6.54908e-09	-0.277687	0.258	0.378	0.000369244	Phloem	Zm00001d049881
Zm00001d003615	6.82689e-09	0.115468	0.298	0.17	0.000384907	Phloem	Zm00001d003615
Zm00001d013445	6.96467e-09	0.118182	0.345	0.208	0.000392675	Phloem	Zm00001d013445
Zm00001d009765	6.98137e-09	-0.192099	0.089	0.229	0.000393617	Phloem	Zm00001d009765
Zm00001d038061	7.00159e-09	0.103115	0.391	0.249	0.000394757	Phloem	Zm00001d038061
Zm00001d018531	7.01943e-09	-0.282581	0.188	0.348	0.000395762	Phloem	Zm00001d018531
Zm00001d029498	7.13065e-09	0.116112	0.643	0.485	0.000402033	Phloem	Zm00001d029498
Zm00001d002434	7.15309e-09	0.119414	0.175	0.084	0.000403298	Phloem	Zm00001d002434
Zm00001d045326	7.22588e-09	-0.100398	0.043	0.167	0.000407402	Phloem	Zm00001d045326
Zm00001d025977	7.41544e-09	-0.139505	0.08	0.217	0.00041809	Phloem	Zm00001d025977
Zm00001d038448	7.42222e-09	0.134964	0.572	0.413	0.000418472	Phloem	Zm00001d038448
Zm00001d043563	7.50157e-09	0.123192	0.714	0.544	0.000422946	Phloem	Zm00001d043563
Zm00001d033876	7.50958e-09	-0.257409	0.28	0.418	0.000423398	Phloem	Zm00001d033876
Zm00001d029848	7.538e-09	-0.148598	0.083	0.222	0.000425	Phloem	Zm00001d029848
Zm00001d016947	7.65065e-09	0.161455	0.277	0.158	0.000431351	Phloem	Zm00001d016947
Zm00001d012581	7.80058e-09	-0.301229	0.191	0.345	0.000439805	Phloem	Zm00001d012581
Zm00001d047113	7.86518e-09	-0.825966	0.089	0.215	0.000443447	Phloem	Zm00001d047113
Zm00001d032570	7.91551e-09	-0.224408	0.08	0.209	0.000446284	Phloem	Zm00001d032570
Zm00001d008245	7.93874e-09	-0.233945	0.932	0.913	0.000447594	Phloem	Zm00001d008245
Zm00001d027618	7.94471e-09	0.185727	0.846	0.781	0.000447931	Phloem	Zm00001d027618
Zm00001d037492	8.15233e-09	-0.251727	0.668	0.723	0.000459637	Phloem	Zm00001d037492
Zm00001d052068	8.24139e-09	-0.591505	0.04	0.151	0.000464658	Phloem	Zm00001d052068
Zm00001d002155	8.40901e-09	0.179194	0.831	0.694	0.000474109	Phloem	Zm00001d002155
Zm00001d051427	8.55064e-09	0.168989	0.846	0.758	0.000482094	Phloem	Zm00001d051427
Zm00001d042555	8.91646e-09	-0.188428	0.111	0.243	0.000502719	Phloem	Zm00001d042555
Zm00001d002261	9.09666e-09	-0.255774	0.092	0.232	0.000512879	Phloem	Zm00001d002261
Zm00001d028866	9.15688e-09	0.121006	0.431	0.275	0.000516274	Phloem	Zm00001d028866
Zm00001d051588	9.18213e-09	0.151194	0.625	0.475	0.000517698	Phloem	Zm00001d051588
Zm00001d049666	9.2459e-09	0.150486	0.969	0.938	0.000521293	Phloem	Zm00001d049666
Zm00001d010728	9.39849e-09	-0.290947	0.394	0.521	0.000529896	Phloem	Zm00001d010728
Zm00001d028968	9.5088e-09	0.366823	0.326	0.205	0.000536116	Phloem	Zm00001d028968
Zm00001d023213	9.53845e-09	-0.135283	0.025	0.135	0.000537787	Phloem	Zm00001d023213
Zm00001d051803	9.81326e-09	0.149551	0.471	0.327	0.000553281	Phloem	Zm00001d051803
Zm00001d045152	1.00093e-08	0.212922	0.84	0.753	0.000564332	Phloem	Zm00001d045152
Zm00001d036758	1.00414e-08	0.155333	0.797	0.652	0.000566143	Phloem	Zm00001d036758
Zm00001d052346	1.0106e-08	0.103565	0.397	0.25	0.000569787	Phloem	Zm00001d052346
Zm00001d010840	1.03787e-08	-0.419169	0.018	0.122	0.000585159	Phloem	Zm00001d010840
Zm00001d049954	1.04444e-08	-0.285619	0.28	0.424	0.000588864	Phloem	Zm00001d049954
Zm00001d048954	1.05444e-08	-0.345716	0.351	0.462	0.000594506	Phloem	Zm00001d048954
Zm00001d052041	1.10453e-08	-0.162069	0.022	0.128	0.000622748	Phloem	Zm00001d052041
Zm00001d020584	1.12241e-08	-0.529294	0.674	0.728	0.000632827	Phloem	Zm00001d020584
Zm00001d002034	1.12867e-08	0.116567	0.695	0.55	0.000636357	Phloem	Zm00001d002034
Zm00001d032950	1.13672e-08	-0.54698	0.363	0.452	0.000640892	Phloem	Zm00001d032950
Zm00001d021299	1.14694e-08	-0.149328	0.105	0.239	0.000646655	Phloem	Zm00001d021299
Zm00001d053862	1.1736e-08	-0.340522	0.034	0.143	0.000661686	Phloem	Zm00001d053862
Zm00001d013785	1.18416e-08	0.173097	0.917	0.871	0.000667641	Phloem	Zm00001d013785
Zm00001d034919	1.21639e-08	-0.248109	0.52	0.63	0.000685812	Phloem	Zm00001d034919
Zm00001d034641	1.25541e-08	0.169151	0.505	0.36	0.000707815	Phloem	Zm00001d034641
Zm00001d034782	1.26913e-08	-0.188488	0.037	0.152	0.00071555	Phloem	Zm00001d034782
Zm00001d010798	1.29753e-08	0.204818	0.578	0.432	0.000731558	Phloem	Zm00001d010798
Zm00001d049099	1.34311e-08	-0.226188	0.751	0.792	0.000757257	Phloem	Zm00001d049099
Zm00001d007011	1.35489e-08	0.25527	0.822	0.712	0.000763902	Phloem	Zm00001d007011
Zm00001d035542	1.42043e-08	0.209017	0.434	0.29	0.000800855	Phloem	Zm00001d035542
Zm00001d017060	1.42171e-08	0.149289	0.655	0.495	0.000801574	Phloem	Zm00001d017060
Zm00001d013777	1.42492e-08	0.148665	0.92	0.878	0.000803384	Phloem	Zm00001d013777
Zm00001d047096	1.45715e-08	-0.216476	0.022	0.127	0.000821555	Phloem	Zm00001d047096
Zm00001d007031	1.45891e-08	0.191337	0.822	0.734	0.000822545	Phloem	Zm00001d007031
Zm00001d003190	1.49803e-08	-0.495822	0.148	0.275	0.000844604	Phloem	Zm00001d003190
Zm00001d023294	1.51906e-08	-0.135026	0.043	0.158	0.000856463	Phloem	Zm00001d023294
Zm00001d014961	1.53266e-08	0.112319	0.477	0.317	0.000864129	Phloem	Zm00001d014961
Zm00001d021961	1.53451e-08	-0.103293	0.022	0.127	0.000865171	Phloem	Zm00001d021961
Zm00001d026214	1.59388e-08	0.146753	0.735	0.578	0.000898646	Phloem	Zm00001d026214
Zm00001d022489	1.62976e-08	0.19178	0.818	0.753	0.000918877	Phloem	Zm00001d022489
Zm00001d052206	1.63598e-08	-0.147754	0.052	0.17	0.00092238	Phloem	Zm00001d052206
Zm00001d045888	1.76162e-08	0.253065	0.345	0.222	0.000993217	Phloem	Zm00001d045888
Zm00001d002006	1.80997e-08	0.187752	0.723	0.577	0.00102048	Phloem	Zm00001d002006
Zm00001d013008	1.85173e-08	0.179874	0.8	0.718	0.00104402	Phloem	Zm00001d013008
Zm00001d047993	1.86188e-08	0.160287	0.52	0.358	0.00104974	Phloem	Zm00001d047993
Zm00001d021017	1.87384e-08	-0.176378	0.022	0.127	0.00105649	Phloem	Zm00001d021017
Zm00001d003545	1.90422e-08	0.197054	0.265	0.157	0.00107362	Phloem	Zm00001d003545
Zm00001d049305	1.90563e-08	0.152001	0.942	0.874	0.00107441	Phloem	Zm00001d049305
Zm00001d026291	2.03233e-08	-0.211819	0.215	0.379	0.00114585	Phloem	Zm00001d026291
Zm00001d051008	2.03812e-08	0.208778	0.385	0.241	0.00114911	Phloem	Zm00001d051008
Zm00001d032055	2.15622e-08	-0.166145	0.018	0.12	0.0012157	Phloem	Zm00001d032055
Zm00001d017353	2.16899e-08	0.113325	0.234	0.128	0.0012229	Phloem	Zm00001d017353
Zm00001d003228	2.20228e-08	0.136694	0.575	0.413	0.00124166	Phloem	Zm00001d003228
Zm00001d035664	2.23531e-08	-0.246444	0.209	0.334	0.00126029	Phloem	Zm00001d035664
Zm00001d024462	2.30431e-08	0.119946	0.514	0.356	0.00129919	Phloem	Zm00001d024462
Zm00001d027667	2.31423e-08	-0.140567	0.052	0.172	0.00130479	Phloem	Zm00001d027667
Zm00001d011314	2.31741e-08	0.219391	0.769	0.697	0.00130658	Phloem	Zm00001d011314
Zm00001d018403	2.37258e-08	0.186619	0.797	0.708	0.00133769	Phloem	Zm00001d018403
Zm00001d051798	2.4068e-08	-0.237167	0.126	0.256	0.00135698	Phloem	Zm00001d051798
Zm00001d052566	2.43188e-08	0.196214	0.591	0.455	0.00137112	Phloem	Zm00001d052566
Zm00001d016733	2.45103e-08	-0.191454	0.025	0.127	0.00138192	Phloem	Zm00001d016733
Zm00001d014100	2.4934e-08	-0.407772	0.074	0.196	0.0014058	Phloem	Zm00001d014100
Zm00001d043149	2.50147e-08	0.165618	0.775	0.667	0.00141035	Phloem	Zm00001d043149
Zm00001d043619	2.60302e-08	0.168232	0.686	0.554	0.00146761	Phloem	Zm00001d043619
Zm00001d035775	2.77434e-08	-0.163509	0.089	0.215	0.0015642	Phloem	Zm00001d035775
Zm00001d033104	2.88164e-08	0.138858	0.692	0.521	0.0016247	Phloem	Zm00001d033104
Zm00001d045520	2.9087e-08	0.130662	0.578	0.411	0.00163995	Phloem	Zm00001d045520
Zm00001d012598	2.93718e-08	0.158953	0.972	0.944	0.00165601	Phloem	Zm00001d012598
Zm00001d011919	3.00118e-08	0.175891	0.674	0.534	0.00169209	Phloem	Zm00001d011919
Zm00001d022393	3.07273e-08	0.138927	0.702	0.559	0.00173244	Phloem	Zm00001d022393
Zm00001d052444	3.12583e-08	0.109076	0.2	0.103	0.00176237	Phloem	Zm00001d052444
Zm00001d021477	3.14478e-08	-0.85333	0.249	0.364	0.00177306	Phloem	Zm00001d021477
Zm00001d045577	3.1567e-08	0.105028	0.446	0.303	0.00177978	Phloem	Zm00001d045577
Zm00001d038553	3.1607e-08	-0.109249	0.034	0.146	0.00178203	Phloem	Zm00001d038553
Zm00001d039330	3.32546e-08	0.186031	0.772	0.66	0.00187493	Phloem	Zm00001d039330
Zm00001d031883	3.42086e-08	0.130775	0.582	0.426	0.00192872	Phloem	Zm00001d031883
Zm00001d051658	3.44728e-08	0.208191	0.363	0.231	0.00194361	Phloem	Zm00001d051658
Zm00001d016105	3.46009e-08	0.113906	0.452	0.301	0.00195084	Phloem	Zm00001d016105
Zm00001d035019	3.66395e-08	0.167579	0.738	0.607	0.00206577	Phloem	Zm00001d035019
Zm00001d017526	3.69481e-08	-0.399899	0.185	0.312	0.00208317	Phloem	Zm00001d017526
Zm00001d040090	3.75109e-08	-0.16383	0.037	0.148	0.0021149	Phloem	Zm00001d040090
Zm00001d023733	3.8154e-08	0.1624	0.754	0.627	0.00215116	Phloem	Zm00001d023733
Zm00001d042717	3.8232e-08	0.178701	0.317	0.199	0.00215556	Phloem	Zm00001d042717
Zm00001d044391	3.90012e-08	0.139011	0.88	0.849	0.00219893	Phloem	Zm00001d044391
Zm00001d008731	3.92712e-08	0.124907	0.729	0.57	0.00221415	Phloem	Zm00001d008731
Zm00001d051174	3.95619e-08	-0.135143	0.012	0.108	0.00223054	Phloem	Zm00001d051174
Zm00001d017238	4.00318e-08	0.130284	0.6	0.444	0.00225703	Phloem	Zm00001d017238
Zm00001d048870	4.06088e-08	-0.11573	0.018	0.117	0.00228956	Phloem	Zm00001d048870
Zm00001d052239	4.06403e-08	0.151974	0.582	0.431	0.00229134	Phloem	Zm00001d052239
Zm00001d017147	4.08764e-08	-0.199357	0.218	0.356	0.00230465	Phloem	Zm00001d017147
Zm00001d038460	4.37245e-08	-0.263064	0.203	0.342	0.00246523	Phloem	Zm00001d038460
Zm00001d052375	4.37606e-08	-0.267127	0.114	0.245	0.00246726	Phloem	Zm00001d052375
Zm00001d013583	4.40716e-08	0.134964	0.514	0.356	0.0024848	Phloem	Zm00001d013583
Zm00001d006650	4.40807e-08	0.148206	0.342	0.217	0.00248531	Phloem	Zm00001d006650
Zm00001d009160	4.46686e-08	0.11492	0.394	0.258	0.00251846	Phloem	Zm00001d009160
Zm00001d014885	4.48463e-08	-0.187076	0.105	0.235	0.00252848	Phloem	Zm00001d014885
Zm00001d040040	4.49991e-08	-0.188061	0.065	0.185	0.00253709	Phloem	Zm00001d040040
Zm00001d039339	4.63922e-08	-0.240795	0.012	0.106	0.00261564	Phloem	Zm00001d039339
Zm00001d026047	4.72873e-08	0.107875	0.532	0.384	0.0026661	Phloem	Zm00001d026047
Zm00001d011514	4.75274e-08	0.11124	0.514	0.356	0.00267964	Phloem	Zm00001d011514
Zm00001d018206	4.82241e-08	-0.113499	0.015	0.11	0.00271892	Phloem	Zm00001d018206
Zm00001d036902	4.86442e-08	0.136423	0.542	0.389	0.00274261	Phloem	Zm00001d036902
Zm00001d042730	4.91783e-08	-0.505885	0.797	0.79	0.00277272	Phloem	Zm00001d042730
Zm00001d044253	5.15649e-08	-0.231692	0.191	0.324	0.00290728	Phloem	Zm00001d044253
Zm00001d052273	5.17084e-08	-0.148544	0.04	0.15	0.00291537	Phloem	Zm00001d052273
Zm00001d013333	5.27152e-08	-0.199788	0.105	0.228	0.00297214	Phloem	Zm00001d013333
Zm00001d051336	5.3189e-08	0.16022	0.806	0.685	0.00299885	Phloem	Zm00001d051336
Zm00001d031967	5.46205e-08	0.144445	0.769	0.659	0.00307956	Phloem	Zm00001d031967
Zm00001d045858	5.53434e-08	0.132764	0.44	0.315	0.00312031	Phloem	Zm00001d045858
Zm00001d037249	5.55394e-08	-0.197578	0.028	0.131	0.00313136	Phloem	Zm00001d037249
Zm00001d011050	5.60055e-08	0.154691	0.363	0.241	0.00315765	Phloem	Zm00001d011050
Zm00001d002409	5.62944e-08	-0.193247	0.022	0.121	0.00317394	Phloem	Zm00001d002409
Zm00001d028201	5.87566e-08	-0.207371	0.769	0.785	0.00331276	Phloem	Zm00001d028201
Zm00001d051419	5.98417e-08	-0.188298	0.068	0.184	0.00337394	Phloem	Zm00001d051419
Zm00001d048627	6.06636e-08	-0.222066	0.772	0.788	0.00342027	Phloem	Zm00001d048627
Zm00001d044106	6.40411e-08	-0.122487	0.015	0.11	0.0036107	Phloem	Zm00001d044106
Zm00001d002253	6.65607e-08	0.11916	0.612	0.454	0.00375276	Phloem	Zm00001d002253
Zm00001d012456	6.67671e-08	-0.237888	0.123	0.249	0.0037644	Phloem	Zm00001d012456
Zm00001d007800	6.68872e-08	0.326401	0.628	0.508	0.00377116	Phloem	Zm00001d007800
Zm00001d021021	6.82934e-08	0.141409	0.822	0.675	0.00385045	Phloem	Zm00001d021021
Zm00001d011348	6.9231e-08	0.140189	0.729	0.601	0.00390331	Phloem	Zm00001d011348
Zm00001d048201	6.9341e-08	-0.214956	0.098	0.223	0.00390951	Phloem	Zm00001d048201
Zm00001d037949	6.96677e-08	-0.270169	0.215	0.342	0.00392794	Phloem	Zm00001d037949
Zm00001d034528	7.34341e-08	0.181545	0.877	0.832	0.00414029	Phloem	Zm00001d034528
Zm00001d003195	7.77151e-08	0.128243	0.348	0.221	0.00438166	Phloem	Zm00001d003195
Zm00001d034569	7.79262e-08	-0.191767	0.185	0.309	0.00439356	Phloem	Zm00001d034569
Zm00001d014721	7.82291e-08	0.10627	0.449	0.304	0.00441063	Phloem	Zm00001d014721
Zm00001d048165	8.09992e-08	0.230587	0.865	0.764	0.00456682	Phloem	Zm00001d048165
Zm00001d010190	8.1629e-08	-0.137887	0.12	0.248	0.00460232	Phloem	Zm00001d010190
Zm00001d029630	8.22815e-08	-0.159661	0.043	0.147	0.00463911	Phloem	Zm00001d029630
Zm00001d034839	8.63186e-08	-0.101643	0.052	0.164	0.00486673	Phloem	Zm00001d034839
Zm00001d047396	8.64629e-08	0.169691	0.726	0.6	0.00487486	Phloem	Zm00001d047396
Zm00001d037211	8.64684e-08	0.175417	0.8	0.703	0.00487517	Phloem	Zm00001d037211
Zm00001d037688	8.66046e-08	-0.131234	0.065	0.182	0.00488286	Phloem	Zm00001d037688
Zm00001d007077	8.67513e-08	0.134349	0.412	0.273	0.00489113	Phloem	Zm00001d007077
Zm00001d035312	8.76954e-08	-0.290074	0.702	0.717	0.00494436	Phloem	Zm00001d035312
Zm00001d035722	8.77041e-08	0.132592	0.849	0.711	0.00494485	Phloem	Zm00001d035722
Zm00001d002035	8.92988e-08	-0.544693	0.498	0.536	0.00503476	Phloem	Zm00001d002035
Zm00001d026278	8.98975e-08	-0.217913	0.908	0.869	0.00506851	Phloem	Zm00001d026278
Zm00001d039947	9.03327e-08	-0.323551	0.102	0.212	0.00509305	Phloem	Zm00001d039947
Zm00001d038730	9.11259e-08	-0.181395	0.049	0.159	0.00513777	Phloem	Zm00001d038730
Zm00001d024981	9.15593e-08	-0.14408	0.025	0.122	0.00516221	Phloem	Zm00001d024981
Zm00001d029703	9.37631e-08	-0.177983	0.037	0.139	0.00528646	Phloem	Zm00001d029703
Zm00001d029448	9.6777e-08	0.114236	0.554	0.397	0.00545639	Phloem	Zm00001d029448
Zm00001d012127	9.99345e-08	0.218731	0.843	0.805	0.00563441	Phloem	Zm00001d012127
Zm00001d023309	1.01826e-07	-0.226299	0.572	0.642	0.00574106	Phloem	Zm00001d023309
Zm00001d007324	1.03406e-07	-0.139706	0.12	0.243	0.00583015	Phloem	Zm00001d007324
Zm00001d043407	1.03766e-07	0.149175	0.649	0.503	0.00585042	Phloem	Zm00001d043407
Zm00001d028550	1.04309e-07	0.159988	0.735	0.622	0.00588102	Phloem	Zm00001d028550
ZeamMp050	1.05578e-07	-0.420035	0.163	0.296	0.00595259	Phloem	ZeamMp050
Zm00001d020968	1.07517e-07	-0.425247	0.375	0.468	0.00606189	Phloem	Zm00001d020968
Zm00001d008794	1.09415e-07	-0.269769	0.197	0.329	0.00616895	Phloem	Zm00001d008794
Zm00001d052208	1.09508e-07	-0.115779	0.052	0.162	0.00617418	Phloem	Zm00001d052208
Zm00001d019881	1.09596e-07	0.108724	0.566	0.384	0.00617913	Phloem	Zm00001d019881
Zm00001d038382	1.11978e-07	-0.376992	0.049	0.153	0.00631342	Phloem	Zm00001d038382
Zm00001d021779	1.17439e-07	-0.120172	0.089	0.211	0.00662134	Phloem	Zm00001d021779
Zm00001d012423	1.18242e-07	-0.475632	0.708	0.748	0.00666661	Phloem	Zm00001d012423
Zm00001d013222	1.19609e-07	-0.436481	0.105	0.222	0.00674368	Phloem	Zm00001d013222
Zm00001d021170	1.2072e-07	0.111071	0.391	0.247	0.00680631	Phloem	Zm00001d021170
Zm00001d047727	1.21522e-07	0.135934	0.674	0.527	0.00685155	Phloem	Zm00001d047727
Zm00001d042365	1.24867e-07	-0.15111	0.135	0.261	0.0070401	Phloem	Zm00001d042365
Zm00001d014946	1.26627e-07	-0.227473	0.705	0.744	0.00713934	Phloem	Zm00001d014946
Zm00001d002564	1.27225e-07	-0.122208	0.04	0.142	0.00717308	Phloem	Zm00001d002564
Zm00001d021141	1.27538e-07	0.179726	0.6	0.471	0.00719075	Phloem	Zm00001d021141
Zm00001d013010	1.30751e-07	0.108392	0.603	0.438	0.00737188	Phloem	Zm00001d013010
Zm00001d039908	1.30831e-07	0.144946	0.92	0.878	0.00737641	Phloem	Zm00001d039908
Zm00001d025567	1.31288e-07	0.141378	0.338	0.218	0.00740214	Phloem	Zm00001d025567
Zm00001d044920	1.31448e-07	0.171536	0.597	0.465	0.00741118	Phloem	Zm00001d044920
Zm00001d018149	1.34278e-07	0.103839	0.431	0.291	0.00757071	Phloem	Zm00001d018149
Zm00001d031853	1.35826e-07	-0.134462	0.043	0.151	0.00765799	Phloem	Zm00001d031853
Zm00001d017912	1.39681e-07	-0.139866	0.046	0.148	0.00787537	Phloem	Zm00001d017912
Zm00001d033817	1.40024e-07	-0.284575	0.274	0.398	0.00789467	Phloem	Zm00001d033817
Zm00001d045043	1.40183e-07	-0.227527	0.268	0.38	0.00790363	Phloem	Zm00001d045043
Zm00001d013066	1.41625e-07	-0.332995	0.775	0.804	0.00798496	Phloem	Zm00001d013066
Zm00001d051015	1.46005e-07	0.149671	0.354	0.226	0.00823189	Phloem	Zm00001d051015
Zm00001d023413	1.47497e-07	-0.104452	0.046	0.151	0.00831602	Phloem	Zm00001d023413
Zm00001d053626	1.4901e-07	-0.1735	0.178	0.311	0.00840132	Phloem	Zm00001d053626
Zm00001d012743	1.49299e-07	-0.495434	0.274	0.416	0.00841761	Phloem	Zm00001d012743
Zm00001d017026	1.51497e-07	0.146414	0.652	0.523	0.00854153	Phloem	Zm00001d017026
Zm00001d035052	1.5204e-07	0.134803	0.655	0.518	0.00857219	Phloem	Zm00001d035052
Zm00001d003712	1.52917e-07	-0.142063	0.034	0.136	0.0086216	Phloem	Zm00001d003712
Zm00001d010220	1.5298e-07	-0.194553	0.794	0.782	0.00862518	Phloem	Zm00001d010220
Zm00001d007901	1.55315e-07	0.400926	0.754	0.617	0.00875684	Phloem	Zm00001d007901
Zm00001d043935	1.60905e-07	-0.182663	0.185	0.317	0.00907199	Phloem	Zm00001d043935
Zm00001d048310	1.65825e-07	0.11916	0.582	0.424	0.00934936	Phloem	Zm00001d048310
Zm00001d035157	1.67255e-07	-0.144376	0.102	0.227	0.00943	Phloem	Zm00001d035157
Zm00001d029048	1.68967e-07	0.104463	0.726	0.556	0.00952653	Phloem	Zm00001d029048
Zm00001d051442	1.69403e-07	-0.1303	0.034	0.134	0.00955109	Phloem	Zm00001d051442
Zm00001d049830	1.71698e-07	0.130248	0.954	0.915	0.0096805	Phloem	Zm00001d049830
Zm00001d047981	1.7922e-07	0.206056	0.705	0.567	0.0101046	Phloem	Zm00001d047981
Zm00001d033528	1.82453e-07	-0.175037	0.138	0.259	0.0102869	Phloem	Zm00001d033528
Zm00001d034829	1.87588e-07	-0.267597	0.212	0.337	0.0105764	Phloem	Zm00001d034829
Zm00001d018631	1.8913e-07	0.161293	0.517	0.386	0.0106634	Phloem	Zm00001d018631
Zm00001d038374	1.89673e-07	0.134235	0.997	0.983	0.010694	Phloem	Zm00001d038374
Zm00001d054065	1.91407e-07	0.162002	0.932	0.897	0.0107917	Phloem	Zm00001d054065
Zm00001d012735	1.91553e-07	0.143175	0.769	0.638	0.0108	Phloem	Zm00001d012735
Zm00001d025239	1.94051e-07	0.14827	0.726	0.596	0.0109408	Phloem	Zm00001d025239
Zm00001d048957	2.01142e-07	-0.309284	0.6	0.621	0.0113406	Phloem	Zm00001d048957
Zm00001d034642	2.02283e-07	0.136723	0.474	0.335	0.0114049	Phloem	Zm00001d034642
Zm00001d043226	2.02929e-07	-0.169584	0.043	0.147	0.0114414	Phloem	Zm00001d043226
Zm00001d012425	2.07391e-07	0.149918	0.754	0.622	0.0116929	Phloem	Zm00001d012425
Zm00001d033320	2.08023e-07	-0.19666	0.148	0.265	0.0117286	Phloem	Zm00001d033320
Zm00001d000345	2.15684e-07	0.147854	0.618	0.479	0.0121605	Phloem	Zm00001d000345
Zm00001d010504	2.17905e-07	0.115057	0.778	0.647	0.0122857	Phloem	Zm00001d010504
Zm00001d034109	2.19834e-07	-0.273852	0.246	0.362	0.0123944	Phloem	Zm00001d034109
Zm00001d021554	2.21216e-07	0.150859	0.846	0.779	0.0124724	Phloem	Zm00001d021554
Zm00001d002450	2.26284e-07	0.18074	0.954	0.891	0.0127581	Phloem	Zm00001d002450
Zm00001d024510	2.27411e-07	0.120722	0.557	0.408	0.0128217	Phloem	Zm00001d024510
Zm00001d027394	2.28082e-07	-0.548964	0.797	0.778	0.0128595	Phloem	Zm00001d027394
Zm00001d051430	2.30897e-07	0.116915	0.637	0.475	0.0130182	Phloem	Zm00001d051430
Zm00001d041243	2.31965e-07	-0.147172	0.126	0.245	0.0130784	Phloem	Zm00001d041243
Zm00001d002191	2.35044e-07	-0.133661	0.034	0.132	0.013252	Phloem	Zm00001d002191
Zm00001d001856	2.35667e-07	0.113685	0.705	0.541	0.0132871	Phloem	Zm00001d001856
Zm00001d007194	2.44887e-07	0.158771	0.551	0.417	0.013807	Phloem	Zm00001d007194
Zm00001d053926	2.49101e-07	0.234083	0.52	0.418	0.0140445	Phloem	Zm00001d053926
Zm00001d013669	2.49979e-07	-0.210657	0.865	0.861	0.0140941	Phloem	Zm00001d013669
Zm00001d009660	2.50185e-07	-0.132068	0.175	0.3	0.0141057	Phloem	Zm00001d009660
Zm00001d031545	2.51208e-07	0.103706	0.548	0.397	0.0141634	Phloem	Zm00001d031545
Zm00001d027975	2.52552e-07	-0.210054	0.092	0.211	0.0142391	Phloem	Zm00001d027975
Zm00001d028714	2.59041e-07	0.143563	0.828	0.717	0.014605	Phloem	Zm00001d028714
Zm00001d041991	2.67213e-07	-0.122115	0.034	0.13	0.0150657	Phloem	Zm00001d041991
Zm00001d039263	2.69266e-07	0.116652	0.603	0.45	0.0151815	Phloem	Zm00001d039263
Zm00001d031666	2.69373e-07	-0.175668	0.108	0.217	0.0151875	Phloem	Zm00001d031666
Zm00001d021859	2.71191e-07	0.124183	0.631	0.489	0.01529	Phloem	Zm00001d021859
Zm00001d047117	2.75982e-07	-1.82949	0.308	0.41	0.0155602	Phloem	Zm00001d047117
Zm00001d049860	2.80957e-07	-0.103087	0.022	0.112	0.0158407	Phloem	Zm00001d049860
Zm00001d051870	2.82983e-07	-0.172996	0.058	0.166	0.0159549	Phloem	Zm00001d051870
Zm00001d051542	2.89462e-07	-0.337845	0.286	0.43	0.0163201	Phloem	Zm00001d051542
Zm00001d038768	2.89665e-07	0.133952	0.72	0.593	0.0163316	Phloem	Zm00001d038768
Zm00001d027037	2.92555e-07	0.187848	0.898	0.863	0.0164945	Phloem	Zm00001d027037
Zm00001d017072	2.96656e-07	0.128889	0.52	0.378	0.0167258	Phloem	Zm00001d017072
Zm00001d015568	3.03183e-07	0.137999	0.843	0.715	0.0170938	Phloem	Zm00001d015568
Zm00001d036250	3.05105e-07	-0.324952	0.142	0.259	0.0172021	Phloem	Zm00001d036250
Zm00001d042214	3.11257e-07	0.119945	0.495	0.354	0.017549	Phloem	Zm00001d042214
Zm00001d043224	3.13504e-07	0.151238	0.791	0.734	0.0176756	Phloem	Zm00001d043224
Zm00001d017622	3.15704e-07	0.325383	0.612	0.493	0.0177997	Phloem	Zm00001d017622
Zm00001d017121	3.18566e-07	-0.183176	0.978	0.973	0.0179611	Phloem	Zm00001d017121
Zm00001d011236	3.18572e-07	-0.382454	0.388	0.475	0.0179614	Phloem	Zm00001d011236
Zm00001d047492	3.21881e-07	-0.107127	0.058	0.165	0.018148	Phloem	Zm00001d047492
Zm00001d003800	3.22536e-07	-0.164341	0.092	0.206	0.0181849	Phloem	Zm00001d003800
Zm00001d033559	3.29755e-07	0.148766	0.782	0.634	0.0185919	Phloem	Zm00001d033559
Zm00001d052458	3.33382e-07	0.147335	0.578	0.44	0.0187964	Phloem	Zm00001d052458
Zm00001d013159	3.37045e-07	-0.186074	0.948	0.95	0.0190029	Phloem	Zm00001d013159
Zm00001d040850	3.40631e-07	-0.121637	0.194	0.324	0.0192051	Phloem	Zm00001d040850
Zm00001d012935	3.43327e-07	0.126483	0.388	0.256	0.0193571	Phloem	Zm00001d012935
Zm00001d025425	3.43656e-07	0.125664	0.671	0.531	0.0193757	Phloem	Zm00001d025425
Zm00001d051227	3.4934e-07	-0.104216	0.126	0.253	0.0196961	Phloem	Zm00001d051227
Zm00001d030665	3.50528e-07	0.155482	0.742	0.627	0.0197631	Phloem	Zm00001d030665
Zm00001d041112	3.63748e-07	0.145875	0.828	0.722	0.0205085	Phloem	Zm00001d041112
Zm00001d030795	3.64042e-07	-0.132314	0.031	0.124	0.0205251	Phloem	Zm00001d030795
Zm00001d014005	3.72784e-07	0.152226	0.738	0.65	0.021018	Phloem	Zm00001d014005
Zm00001d008573	3.76958e-07	0.191985	0.692	0.559	0.0212533	Phloem	Zm00001d008573
Zm00001d019186	3.78895e-07	0.176297	0.843	0.753	0.0213625	Phloem	Zm00001d019186
Zm00001d026589	3.82537e-07	0.129852	0.692	0.532	0.0215678	Phloem	Zm00001d026589
Zm00001d038839	3.82884e-07	0.175802	0.883	0.821	0.0215874	Phloem	Zm00001d038839
Zm00001d031132	3.84168e-07	0.19981	0.855	0.77	0.0216598	Phloem	Zm00001d031132
Zm00001d015375	4.01151e-07	0.135814	0.782	0.663	0.0226173	Phloem	Zm00001d015375
Zm00001d045370	4.03646e-07	0.10122	0.283	0.176	0.0227579	Phloem	Zm00001d045370
Zm00001d035925	4.05893e-07	-0.222387	0.508	0.573	0.0228847	Phloem	Zm00001d035925
Zm00001d030391	4.09344e-07	-0.114978	0.018	0.106	0.0230792	Phloem	Zm00001d030391
Zm00001d039719	4.10898e-07	-0.109432	0.108	0.23	0.0231668	Phloem	Zm00001d039719
Zm00001d002065	4.12014e-07	-0.269154	0.502	0.558	0.0232297	Phloem	Zm00001d002065
Zm00001d010617	4.21295e-07	-0.607886	0.382	0.455	0.0237531	Phloem	Zm00001d010617
Zm00001d011162	4.25057e-07	0.149562	0.729	0.604	0.0239652	Phloem	Zm00001d011162
Zm00001d035028	4.50573e-07	-0.138656	0.028	0.119	0.0254037	Phloem	Zm00001d035028
Zm00001d034205	4.58999e-07	0.11252	0.535	0.388	0.0258788	Phloem	Zm00001d034205
Zm00001d039251	4.66518e-07	0.504085	0.449	0.296	0.0263028	Phloem	Zm00001d039251
Zm00001d009700	4.69643e-07	0.120415	0.865	0.761	0.026479	Phloem	Zm00001d009700
Zm00001d007631	4.79566e-07	-0.448207	0.028	0.116	0.0270384	Phloem	Zm00001d007631
GRMZM5G834666	4.81026e-07	0.155596	0.615	0.466	0.0271207	Phloem	GRMZM5G834666
Zm00001d029601	4.83545e-07	0.150083	0.517	0.39	0.0272628	Phloem	Zm00001d029601
Zm00001d006889	4.92066e-07	-0.217518	0.468	0.554	0.0277432	Phloem	Zm00001d006889
Zm00001d045000	5.07511e-07	0.154008	0.945	0.919	0.028614	Phloem	Zm00001d045000
Zm00001d046893	5.10435e-07	-0.187457	0.065	0.169	0.0287788	Phloem	Zm00001d046893
Zm00001d022228	5.10915e-07	-0.602536	0.178	0.283	0.0288059	Phloem	Zm00001d022228
Zm00001d029656	5.13339e-07	-0.171645	0.092	0.202	0.0289425	Phloem	Zm00001d029656
Zm00001d031431	5.15414e-07	0.121134	0.526	0.399	0.0290596	Phloem	Zm00001d031431
Zm00001d011412	5.20647e-07	0.147363	0.732	0.602	0.0293546	Phloem	Zm00001d011412
Zm00001d035693	5.23303e-07	0.144275	0.658	0.539	0.0295044	Phloem	Zm00001d035693
Zm00001d020510	5.32835e-07	0.116593	0.582	0.442	0.0300417	Phloem	Zm00001d020510
Zm00001d012044	5.3755e-07	0.100314	0.671	0.536	0.0303076	Phloem	Zm00001d012044
Zm00001d040773	5.38443e-07	0.231578	0.317	0.205	0.030358	Phloem	Zm00001d040773
Zm00001d020511	5.44697e-07	0.197245	0.8	0.702	0.0307106	Phloem	Zm00001d020511
Zm00001d037479	5.5146e-07	0.124391	0.978	0.962	0.0310919	Phloem	Zm00001d037479
Zm00001d049657	5.58428e-07	-0.11489	0.058	0.165	0.0314847	Phloem	Zm00001d049657
Zm00001d011434	5.67823e-07	-0.292851	0.151	0.264	0.0320144	Phloem	Zm00001d011434
Zm00001d036069	5.79102e-07	-0.305951	0.034	0.123	0.0326504	Phloem	Zm00001d036069
Zm00001d040281	5.82736e-07	0.154622	0.855	0.794	0.0328553	Phloem	Zm00001d040281
Zm00001d003187	5.9325e-07	-0.279796	0.175	0.292	0.033448	Phloem	Zm00001d003187
Zm00001d027988	6.1882e-07	0.295138	0.502	0.385	0.0348897	Phloem	Zm00001d027988
Zm00001d010804	6.30976e-07	0.144418	0.868	0.797	0.0355751	Phloem	Zm00001d010804
Zm00001d027540	6.32506e-07	0.882184	0.123	0.058	0.0356613	Phloem	Zm00001d027540
Zm00001d031529	6.32639e-07	-0.295707	0.231	0.365	0.0356688	Phloem	Zm00001d031529
Zm00001d038999	6.34518e-07	-0.236899	0.643	0.686	0.0357747	Phloem	Zm00001d038999
Zm00001d038057	6.62346e-07	0.155291	0.837	0.778	0.0373437	Phloem	Zm00001d038057
Zm00001d042347	6.62861e-07	0.138155	0.812	0.716	0.0373728	Phloem	Zm00001d042347
Zm00001d011849	6.85703e-07	-0.155873	0.052	0.153	0.0386606	Phloem	Zm00001d011849
Zm00001d009927	6.86935e-07	0.117741	0.255	0.152	0.0387301	Phloem	Zm00001d009927
Zm00001d049273	6.8823e-07	-0.171726	0.068	0.177	0.0388031	Phloem	Zm00001d049273
Zm00001d046866	6.91802e-07	-0.111033	0.052	0.156	0.0390045	Phloem	Zm00001d046866
Zm00001d022139	6.93825e-07	0.109822	0.702	0.558	0.0391185	Phloem	Zm00001d022139
Zm00001d053065	6.98673e-07	-0.156716	0.145	0.261	0.0393919	Phloem	Zm00001d053065
Zm00001d026026	7.17739e-07	-0.227389	0.234	0.359	0.0404668	Phloem	Zm00001d026026
Zm00001d029783	7.25807e-07	0.126029	0.529	0.393	0.0409217	Phloem	Zm00001d029783
Zm00001d017650	7.2877e-07	-0.161653	0.025	0.111	0.0410888	Phloem	Zm00001d017650
Zm00001d038163	7.53749e-07	-0.333936	0.114	0.234	0.0424971	Phloem	Zm00001d038163
Zm00001d034034	7.88048e-07	0.105755	0.628	0.475	0.0444309	Phloem	Zm00001d034034
Zm00001d020236	7.95679e-07	-0.237424	0.425	0.493	0.0448612	Phloem	Zm00001d020236
Zm00001d019467	8.04367e-07	0.115235	0.48	0.341	0.045351	Phloem	Zm00001d019467
Zm00001d008255	8.0919e-07	-0.100086	0.034	0.126	0.0456229	Phloem	Zm00001d008255
Zm00001d024005	8.32322e-07	0.122215	0.6	0.464	0.0469271	Phloem	Zm00001d024005
Zm00001d018979	8.53671e-07	0.135031	0.837	0.721	0.0481308	Phloem	Zm00001d018979
Zm00001d048090	8.59855e-07	-0.152096	0.095	0.202	0.0484795	Phloem	Zm00001d048090
Zm00001d051116	8.65747e-07	0.161259	0.785	0.663	0.0488117	Phloem	Zm00001d051116
Zm00001d002816	8.75722e-07	-0.199809	0.086	0.19	0.0493741	Phloem	Zm00001d002816
Zm00001d007446	8.95357e-07	0.100985	0.84	0.746	0.0504811	Phloem	Zm00001d007446
Zm00001d011113	8.96689e-07	0.177271	0.905	0.851	0.0505562	Phloem	Zm00001d011113
Zm00001d044677	8.99209e-07	-0.342981	0.135	0.242	0.0506983	Phloem	Zm00001d044677
Zm00001d017294	9.09629e-07	-0.116027	0.068	0.17	0.0512858	Phloem	Zm00001d017294
Zm00001d028474	9.446e-07	-0.265965	0.206	0.318	0.0532575	Phloem	Zm00001d028474
Zm00001d010040	9.47266e-07	-0.116566	0.16	0.276	0.0534078	Phloem	Zm00001d010040
Zm00001d041685	9.51495e-07	0.116296	0.422	0.295	0.0536462	Phloem	Zm00001d041685
Zm00001d042302	9.52244e-07	-0.306701	0.348	0.467	0.0536885	Phloem	Zm00001d042302
Zm00001d028981	9.52745e-07	0.113071	0.655	0.543	0.0537167	Phloem	Zm00001d028981
Zm00001d014957	9.54349e-07	0.100591	0.975	0.962	0.0538072	Phloem	Zm00001d014957
Zm00001d021958	9.58543e-07	0.140275	0.825	0.734	0.0540436	Phloem	Zm00001d021958
Zm00001d037693	9.58689e-07	0.135182	0.468	0.326	0.0540519	Phloem	Zm00001d037693
Zm00001d027355	9.63436e-07	0.187331	0.729	0.621	0.0543195	Phloem	Zm00001d027355
Zm00001d048222	9.8188e-07	0.115774	0.683	0.538	0.0553594	Phloem	Zm00001d048222
Zm00001d024571	9.85827e-07	-0.144172	0.972	0.953	0.0555819	Phloem	Zm00001d024571
Zm00001d033210	9.89629e-07	-0.153922	0.969	0.936	0.0557963	Phloem	Zm00001d033210
Zm00001d029625	9.95722e-07	-0.152325	0.025	0.11	0.0561398	Phloem	Zm00001d029625
Zm00001d031118	1.00061e-06	-0.235294	0.188	0.306	0.0564154	Phloem	Zm00001d031118
Zm00001d042507	1.00397e-06	-0.204746	0.246	0.361	0.0566048	Phloem	Zm00001d042507
Zm00001d011826	1.00833e-06	-0.101261	0.04	0.129	0.0568509	Phloem	Zm00001d011826
Zm00001d048138	1.01343e-06	-0.218895	0.218	0.347	0.057138	Phloem	Zm00001d048138
Zm00001d052985	1.02139e-06	-0.274937	0.391	0.476	0.0575871	Phloem	Zm00001d052985
Zm00001d005276	1.02434e-06	-0.193596	0.935	0.938	0.0577532	Phloem	Zm00001d005276
Zm00001d030999	1.03131e-06	-0.183582	0.092	0.202	0.058146	Phloem	Zm00001d030999
Zm00001d013302	1.05747e-06	0.107071	0.686	0.544	0.0596211	Phloem	Zm00001d013302
Zm00001d032285	1.0748e-06	0.157356	0.437	0.317	0.0605983	Phloem	Zm00001d032285
Zm00001d012292	1.084e-06	0.165544	0.585	0.441	0.0611172	Phloem	Zm00001d012292
Zm00001d012527	1.08476e-06	0.148352	0.588	0.436	0.0611598	Phloem	Zm00001d012527
Zm00001d033976	1.09858e-06	0.179285	0.809	0.697	0.0619392	Phloem	Zm00001d033976
Zm00001d015313	1.10837e-06	0.137878	0.566	0.419	0.0624909	Phloem	Zm00001d015313
Zm00001d018336	1.13174e-06	-0.137854	0.052	0.151	0.0638085	Phloem	Zm00001d018336
Zm00001d013041	1.13267e-06	0.157758	0.858	0.783	0.0638612	Phloem	Zm00001d013041
Zm00001d026413	1.13352e-06	-0.46277	0.185	0.311	0.063909	Phloem	Zm00001d026413
Zm00001d033480	1.17435e-06	-0.255044	0.557	0.599	0.066211	Phloem	Zm00001d033480
Zm00001d028917	1.18432e-06	0.121354	0.52	0.378	0.066773	Phloem	Zm00001d028917
Zm00001d032775	1.19289e-06	0.114307	0.665	0.519	0.0672564	Phloem	Zm00001d032775
Zm00001d053213	1.19308e-06	0.185964	0.44	0.325	0.0672669	Phloem	Zm00001d053213
Zm00001d052749	1.19606e-06	-0.216164	0.194	0.335	0.0674353	Phloem	Zm00001d052749
Zm00001d015378	1.24298e-06	-0.25044	0.818	0.779	0.0700802	Phloem	Zm00001d015378
Zm00001d024702	1.24557e-06	-0.139056	0.172	0.291	0.0702266	Phloem	Zm00001d024702
Zm00001d036565	1.27407e-06	0.143445	0.972	0.957	0.0718332	Phloem	Zm00001d036565
Zm00001d038618	1.3017e-06	-0.114046	0.046	0.14	0.0733911	Phloem	Zm00001d038618
Zm00001d045706	1.32536e-06	-0.246851	0.545	0.602	0.0747253	Phloem	Zm00001d045706
Zm00001d049190	1.32651e-06	-0.264231	0.157	0.279	0.07479	Phloem	Zm00001d049190
Zm00001d037993	1.32846e-06	0.113279	0.72	0.576	0.0748999	Phloem	Zm00001d037993
Zm00001d024821	1.34438e-06	-0.136288	0.092	0.2	0.0757976	Phloem	Zm00001d024821
Zm00001d047218	1.36355e-06	0.105022	0.625	0.499	0.0768781	Phloem	Zm00001d047218
Zm00001d050705	1.36957e-06	-0.116036	0.077	0.189	0.0772175	Phloem	Zm00001d050705
Zm00001d011403	1.37985e-06	-0.108489	0.08	0.181	0.0777971	Phloem	Zm00001d011403
Zm00001d022643	1.38764e-06	-0.12358	0.049	0.144	0.0782364	Phloem	Zm00001d022643
Zm00001d042361	1.42196e-06	-0.100394	0.071	0.17	0.0801717	Phloem	Zm00001d042361
Zm00001d008357	1.42199e-06	-0.206141	0.338	0.45	0.0801732	Phloem	Zm00001d008357
Zm00001d027794	1.42725e-06	-0.31093	0.154	0.275	0.0804696	Phloem	Zm00001d027794
Zm00001d029597	1.47092e-06	0.183638	0.735	0.618	0.0829322	Phloem	Zm00001d029597
Zm00001d000428	1.52283e-06	-0.138946	0.052	0.148	0.0858589	Phloem	Zm00001d000428
Zm00001d005716	1.53191e-06	-0.108703	0.169	0.285	0.0863709	Phloem	Zm00001d005716
Zm00001d004728	1.55344e-06	-0.556992	0.077	0.18	0.0875845	Phloem	Zm00001d004728
Zm00001d038931	1.58173e-06	0.130807	0.754	0.639	0.0891795	Phloem	Zm00001d038931
Zm00001d012594	1.5839e-06	0.11453	0.197	0.109	0.089302	Phloem	Zm00001d012594
Zm00001d001988	1.58853e-06	0.164585	0.631	0.484	0.0895631	Phloem	Zm00001d001988
Zm00001d012878	1.59738e-06	-0.159438	0.938	0.939	0.0900617	Phloem	Zm00001d012878
Zm00001d026286	1.62003e-06	0.155979	0.948	0.924	0.0913389	Phloem	Zm00001d026286
Zm00001d009568	1.6494e-06	-0.173645	0.188	0.316	0.092995	Phloem	Zm00001d009568
Zm00001d045675	1.65389e-06	-0.195297	0.298	0.429	0.0932477	Phloem	Zm00001d045675
Zm00001d008843	1.66918e-06	-0.425913	0.332	0.409	0.0941102	Phloem	Zm00001d008843
Zm00001d002576	1.69727e-06	0.102396	0.178	0.098	0.0956938	Phloem	Zm00001d002576
Zm00001d017522	1.73998e-06	-0.20288	0.391	0.49	0.0981018	Phloem	Zm00001d017522
Zm00001d049234	1.74115e-06	-0.2087	0.877	0.881	0.0981675	Phloem	Zm00001d049234
Zm00001d018056	1.7718e-06	0.113477	0.585	0.45	0.0998958	Phloem	Zm00001d018056
Zm00001d005879	1.78726e-06	-0.274683	0.126	0.228	0.100768	Phloem	Zm00001d005879
Zm00001d013999	1.80747e-06	0.124326	0.92	0.883	0.101907	Phloem	Zm00001d013999
Zm00001d042449	1.8175e-06	-0.192633	0.135	0.243	0.102473	Phloem	Zm00001d042449
Zm00001d037422	1.87294e-06	0.147537	0.702	0.571	0.105598	Phloem	Zm00001d037422
Zm00001d013061	1.87789e-06	0.123346	0.578	0.457	0.105877	Phloem	Zm00001d013061
Zm00001d005995	1.90574e-06	-0.176889	0.046	0.138	0.107447	Phloem	Zm00001d005995
Zm00001d032363	2.00367e-06	0.1417	0.32	0.211	0.112969	Phloem	Zm00001d032363
Zm00001d009060	2.0092e-06	-0.105986	0.025	0.107	0.113281	Phloem	Zm00001d009060
Zm00001d001984	2.06171e-06	-0.125124	0.025	0.108	0.116241	Phloem	Zm00001d001984
Zm00001d017961	2.0647e-06	-0.213961	0.243	0.353	0.11641	Phloem	Zm00001d017961
Zm00001d008428	2.09971e-06	0.143465	0.754	0.631	0.118384	Phloem	Zm00001d008428
Zm00001d020512	2.13374e-06	-0.126156	0.111	0.218	0.120302	Phloem	Zm00001d020512
Zm00001d008342	2.13657e-06	0.112338	0.498	0.349	0.120462	Phloem	Zm00001d008342
Zm00001d018177	2.17026e-06	-0.314325	0.754	0.729	0.122361	Phloem	Zm00001d018177
Zm00001d001907	2.20396e-06	0.147236	0.498	0.37	0.124262	Phloem	Zm00001d001907
Zm00001d012968	2.20396e-06	0.149004	0.308	0.203	0.124262	Phloem	Zm00001d012968
Zm00001d017347	2.2132e-06	-0.164616	0.178	0.293	0.124782	Phloem	Zm00001d017347
Zm00001d002259	2.26407e-06	0.144764	0.788	0.709	0.127651	Phloem	Zm00001d002259
Zm00001d005858	2.28552e-06	0.116237	0.606	0.467	0.12886	Phloem	Zm00001d005858
Zm00001d034731	2.29719e-06	-0.351557	0.302	0.397	0.129518	Phloem	Zm00001d034731
Zm00001d006756	2.30701e-06	0.104429	0.375	0.26	0.130071	Phloem	Zm00001d006756
Zm00001d042028	2.31381e-06	-0.16437	0.185	0.3	0.130455	Phloem	Zm00001d042028
Zm00001d023901	2.35179e-06	-0.387376	0.646	0.689	0.132596	Phloem	Zm00001d023901
Zm00001d040364	2.45866e-06	-0.389962	0.074	0.171	0.138622	Phloem	Zm00001d040364
Zm00001d012017	2.49626e-06	0.119034	0.76	0.648	0.140742	Phloem	Zm00001d012017
Zm00001d013098	2.5343e-06	-0.222934	0.28	0.385	0.142887	Phloem	Zm00001d013098
Zm00001d049081	2.54565e-06	0.142177	0.185	0.105	0.143526	Phloem	Zm00001d049081
Zm00001d008594	2.55938e-06	0.163783	0.905	0.872	0.1443	Phloem	Zm00001d008594
Zm00001d012858	2.59755e-06	0.103338	0.625	0.483	0.146453	Phloem	Zm00001d012858
Zm00001d040596	2.70575e-06	0.103656	0.594	0.453	0.152553	Phloem	Zm00001d040596
Zm00001d049807	2.80902e-06	0.113956	0.557	0.426	0.158375	Phloem	Zm00001d049807
Zm00001d038012	2.81375e-06	0.125961	0.582	0.471	0.158642	Phloem	Zm00001d038012
Zm00001d021442	2.95986e-06	-0.147807	0.037	0.125	0.16688	Phloem	Zm00001d021442
Zm00001d043845	3.02357e-06	-0.307511	0.335	0.445	0.170472	Phloem	Zm00001d043845
Zm00001d040880	3.04199e-06	0.105718	0.6	0.459	0.17151	Phloem	Zm00001d040880
Zm00001d035610	3.0487e-06	0.110705	0.375	0.259	0.171889	Phloem	Zm00001d035610
Zm00001d010385	3.07682e-06	-0.29803	0.271	0.375	0.173474	Phloem	Zm00001d010385
Zm00001d050172	3.13544e-06	0.108188	0.622	0.472	0.176779	Phloem	Zm00001d050172
Zm00001d022032	3.15006e-06	0.249156	0.378	0.263	0.177603	Phloem	Zm00001d022032
Zm00001d036708	3.19097e-06	0.164712	0.862	0.774	0.17991	Phloem	Zm00001d036708
Zm00001d022390	3.25478e-06	-0.174276	0.052	0.143	0.183508	Phloem	Zm00001d022390
Zm00001d032485	3.27084e-06	-0.14001	0.246	0.371	0.184413	Phloem	Zm00001d032485
Zm00001d030868	3.31705e-06	-0.170239	0.117	0.227	0.187019	Phloem	Zm00001d030868
Zm00001d009118	3.4082e-06	0.133253	0.622	0.487	0.192158	Phloem	Zm00001d009118
Zm00001d035310	3.4628e-06	-0.145122	0.068	0.168	0.195236	Phloem	Zm00001d035310
Zm00001d052112	3.46962e-06	-0.132014	0.055	0.148	0.195621	Phloem	Zm00001d052112
Zm00001d026572	3.64814e-06	-0.193524	0.154	0.266	0.205686	Phloem	Zm00001d026572
Zm00001d033846	3.66921e-06	0.121684	0.458	0.331	0.206874	Phloem	Zm00001d033846
Zm00001d045599	3.79851e-06	-0.181587	0.228	0.341	0.214164	Phloem	Zm00001d045599
Zm00001d041352	3.91933e-06	0.130708	0.858	0.75	0.220976	Phloem	Zm00001d041352
Zm00001d020225	3.93836e-06	-0.285578	0.098	0.197	0.222049	Phloem	Zm00001d020225
Zm00001d022418	3.96244e-06	0.132512	0.566	0.432	0.223407	Phloem	Zm00001d022418
Zm00001d028045	4.0305e-06	-0.149343	0.108	0.211	0.227244	Phloem	Zm00001d028045
Zm00001d041489	4.14742e-06	-0.184015	0.068	0.161	0.233835	Phloem	Zm00001d041489
Zm00001d046055	4.19793e-06	0.145441	0.151	0.08	0.236684	Phloem	Zm00001d046055
Zm00001d020438	4.23244e-06	0.119491	0.658	0.518	0.238629	Phloem	Zm00001d020438
Zm00001d008257	4.25291e-06	0.129711	0.803	0.688	0.239783	Phloem	Zm00001d008257
Zm00001d037246	4.27121e-06	0.107738	0.618	0.501	0.240815	Phloem	Zm00001d037246
Zm00001d026439	4.29724e-06	-0.219214	0.08	0.175	0.242283	Phloem	Zm00001d026439
Zm00001d043295	4.29995e-06	-0.11038	0.043	0.128	0.242435	Phloem	Zm00001d043295
Zm00001d031447	4.30114e-06	-0.115047	0.043	0.129	0.242503	Phloem	Zm00001d031447
Zm00001d015767	4.34391e-06	-0.151852	0.12	0.218	0.244914	Phloem	Zm00001d015767
Zm00001d038658	4.3455e-06	0.112468	0.825	0.729	0.245003	Phloem	Zm00001d038658
Zm00001d020552	4.36171e-06	-0.189822	0.111	0.21	0.245918	Phloem	Zm00001d020552
Zm00001d037239	4.45249e-06	0.125406	0.815	0.728	0.251036	Phloem	Zm00001d037239
Zm00001d050615	4.56763e-06	-0.183731	0.188	0.308	0.257528	Phloem	Zm00001d050615
Zm00001d040399	4.57797e-06	-0.303872	0.523	0.56	0.258111	Phloem	Zm00001d040399
Zm00001d034547	4.582e-06	-0.145549	0.138	0.251	0.258338	Phloem	Zm00001d034547
Zm00001d021596	4.60551e-06	-0.20261	0.2	0.299	0.259663	Phloem	Zm00001d021596
Zm00001d016723	4.67264e-06	-0.340599	0.311	0.401	0.263448	Phloem	Zm00001d016723
Zm00001d047788	4.71009e-06	-0.329376	0.551	0.594	0.265559	Phloem	Zm00001d047788
Zm00001d043113	4.88539e-06	0.112823	0.529	0.404	0.275443	Phloem	Zm00001d043113
Zm00001d043075	4.98447e-06	0.122631	0.262	0.164	0.281029	Phloem	Zm00001d043075
Zm00001d019062	5.0457e-06	-0.210357	0.44	0.523	0.284481	Phloem	Zm00001d019062
Zm00001d013092	5.10284e-06	0.117608	0.643	0.519	0.287703	Phloem	Zm00001d013092
Zm00001d028941	5.10596e-06	-0.122556	0.086	0.18	0.287879	Phloem	Zm00001d028941
Zm00001d053696	5.12702e-06	-0.321093	0.357	0.425	0.289067	Phloem	Zm00001d053696
Zm00001d035500	5.17372e-06	0.142153	0.671	0.536	0.291699	Phloem	Zm00001d035500
Zm00001d004725	5.18727e-06	-0.344151	0.028	0.106	0.292463	Phloem	Zm00001d004725
Zm00001d043382	5.26297e-06	0.14638	0.837	0.705	0.296731	Phloem	Zm00001d043382
Zm00001d052200	5.27608e-06	-0.165478	0.169	0.282	0.297471	Phloem	Zm00001d052200
Zm00001d008287	5.29157e-06	-0.121561	0.157	0.267	0.298344	Phloem	Zm00001d008287
Zm00001d020580	5.40664e-06	-0.543116	0.772	0.777	0.304832	Phloem	Zm00001d020580
Zm00001d044159	5.49005e-06	-0.25477	0.305	0.411	0.309534	Phloem	Zm00001d044159
Zm00001d036959	5.57006e-06	-0.114966	0.942	0.923	0.314046	Phloem	Zm00001d036959
Zm00001d033822	5.6741e-06	-0.324802	0.286	0.382	0.319911	Phloem	Zm00001d033822
Zm00001d045650	5.85699e-06	0.110218	0.711	0.562	0.330223	Phloem	Zm00001d045650
Zm00001d053217	5.87858e-06	0.100279	0.689	0.569	0.33144	Phloem	Zm00001d053217
Zm00001d044037	5.9076e-06	-0.195832	0.145	0.246	0.333077	Phloem	Zm00001d044037
Zm00001d042690	6.14978e-06	-0.127408	0.062	0.15	0.346731	Phloem	Zm00001d042690
Zm00001d013268	6.15332e-06	-0.381156	0.298	0.402	0.34693	Phloem	Zm00001d013268
Zm00001d033909	6.24721e-06	-0.304071	0.065	0.156	0.352224	Phloem	Zm00001d033909
Zm00001d044908	6.28544e-06	-0.326282	0.357	0.451	0.354379	Phloem	Zm00001d044908
Zm00001d013156	6.31764e-06	0.12775	0.803	0.702	0.356195	Phloem	Zm00001d013156
Zm00001d042729	6.41463e-06	0.105314	0.545	0.414	0.361663	Phloem	Zm00001d042729
Zm00001d032694	6.47278e-06	-0.158023	0.135	0.235	0.364942	Phloem	Zm00001d032694
Zm00001d021201	6.56149e-06	-0.215484	0.422	0.493	0.369943	Phloem	Zm00001d021201
Zm00001d007653	6.9435e-06	-0.153479	0.055	0.147	0.391481	Phloem	Zm00001d007653
Zm00001d035445	6.96412e-06	-0.185118	0.455	0.527	0.392644	Phloem	Zm00001d035445
Zm00001d036570	7.01405e-06	0.165404	0.754	0.652	0.395459	Phloem	Zm00001d036570
Zm00001d041322	7.07866e-06	0.117853	0.788	0.675	0.399102	Phloem	Zm00001d041322
Zm00001d038167	7.11323e-06	-0.212368	0.369	0.437	0.401051	Phloem	Zm00001d038167
Zm00001d007097	7.11365e-06	0.165495	0.326	0.226	0.401075	Phloem	Zm00001d007097
Zm00001d032679	7.21044e-06	-0.116527	0.031	0.107	0.406532	Phloem	Zm00001d032679
Zm00001d026271	7.24786e-06	0.165885	0.538	0.429	0.408641	Phloem	Zm00001d026271
Zm00001d043942	7.26192e-06	-0.175336	0.945	0.923	0.409434	Phloem	Zm00001d043942
Zm00001d013003	7.26441e-06	-0.38685	0.622	0.581	0.409575	Phloem	Zm00001d013003
Zm00001d004509	7.32862e-06	-0.156361	0.046	0.131	0.413195	Phloem	Zm00001d004509
Zm00001d015134	7.67031e-06	0.124182	0.895	0.818	0.43246	Phloem	Zm00001d015134
Zm00001d033646	7.75115e-06	-0.241299	0.412	0.51	0.437018	Phloem	Zm00001d033646
Zm00001d052865	7.76297e-06	0.112716	0.637	0.506	0.437684	Phloem	Zm00001d052865
Zm00001d018454	7.80644e-06	-0.225062	0.634	0.669	0.440135	Phloem	Zm00001d018454
Zm00001d030618	7.83133e-06	0.142203	0.855	0.74	0.441538	Phloem	Zm00001d030618
Zm00001d045784	7.85449e-06	0.133511	0.655	0.529	0.442844	Phloem	Zm00001d045784
Zm00001d049389	7.90377e-06	0.118956	0.686	0.576	0.445622	Phloem	Zm00001d049389
Zm00001d044455	7.97263e-06	0.110354	0.668	0.53	0.449505	Phloem	Zm00001d044455
Zm00001d013317	7.9747e-06	0.101926	0.646	0.497	0.449621	Phloem	Zm00001d013317
Zm00001d034688	8.01001e-06	0.115147	0.6	0.468	0.451613	Phloem	Zm00001d034688
Zm00001d031705	8.20198e-06	-0.244419	0.502	0.546	0.462436	Phloem	Zm00001d031705
Zm00001d047116	8.31041e-06	-0.755936	0.095	0.187	0.468549	Phloem	Zm00001d047116
Zm00001d001865	8.42704e-06	-0.194941	0.182	0.284	0.475125	Phloem	Zm00001d001865
Zm00001d045298	8.45712e-06	-0.138235	0.095	0.193	0.476821	Phloem	Zm00001d045298
Zm00001d041827	8.52993e-06	-0.120671	0.031	0.108	0.480926	Phloem	Zm00001d041827
Zm00001d011766	8.54491e-06	0.104535	0.865	0.818	0.48177	Phloem	Zm00001d011766
Zm00001d030690	8.68339e-06	0.122976	0.846	0.783	0.489578	Phloem	Zm00001d030690
Zm00001d041734	8.77587e-06	0.124837	0.689	0.566	0.494792	Phloem	Zm00001d041734
Zm00001d027901	8.82759e-06	0.147413	0.588	0.484	0.497709	Phloem	Zm00001d027901
Zm00001d018415	8.85727e-06	-0.25647	0.265	0.368	0.499382	Phloem	Zm00001d018415
Zm00001d028230	8.97399e-06	-0.159097	0.077	0.17	0.505963	Phloem	Zm00001d028230
Zm00001d013612	8.98302e-06	-0.341663	0.302	0.382	0.506472	Phloem	Zm00001d013612
Zm00001d052584	9.04578e-06	-0.106088	0.055	0.145	0.51001	Phloem	Zm00001d052584
Zm00001d041072	9.12725e-06	-0.199011	0.6	0.657	0.514603	Phloem	Zm00001d041072
Zm00001d047119	9.15072e-06	0.167713	0.575	0.474	0.515927	Phloem	Zm00001d047119
Zm00001d029859	9.22131e-06	-0.929625	0.231	0.305	0.519907	Phloem	Zm00001d029859
Zm00001d021433	9.30871e-06	-0.436422	0.705	0.686	0.524835	Phloem	Zm00001d021433
Zm00001d002028	9.37779e-06	0.114427	0.529	0.413	0.528729	Phloem	Zm00001d002028
Zm00001d052493	9.44015e-06	0.107982	0.397	0.279	0.532245	Phloem	Zm00001d052493
Zm00001d017169	9.51749e-06	0.12681	0.778	0.648	0.536605	Phloem	Zm00001d017169
Zm00001d031429	9.74538e-06	-0.154542	0.972	0.979	0.549454	Phloem	Zm00001d031429
Zm00001d026563	9.83335e-06	0.136499	0.486	0.373	0.554414	Phloem	Zm00001d026563
Zm00001d034313	1.00901e-05	-0.138631	0.055	0.139	0.568889	Phloem	Zm00001d034313
Zm00001d035288	1.0255e-05	0.12487	0.846	0.74	0.578184	Phloem	Zm00001d035288
Zm00001d046805	1.03343e-05	-0.105711	0.089	0.185	0.582659	Phloem	Zm00001d046805
Zm00001d009594	1.0822e-05	0.112221	0.418	0.297	0.610156	Phloem	Zm00001d009594
ZeamMp097	1.11161e-05	-0.312011	0.135	0.239	0.626735	Phloem	ZeamMp097
Zm00001d014926	1.13526e-05	-0.269782	0.425	0.487	0.640069	Phloem	Zm00001d014926
Zm00001d003502	1.13784e-05	0.142586	0.723	0.596	0.641524	Phloem	Zm00001d003502
Zm00001d026311	1.15812e-05	0.109685	0.523	0.397	0.652959	Phloem	Zm00001d026311
Zm00001d014817	1.15873e-05	-0.116444	0.046	0.128	0.653305	Phloem	Zm00001d014817
Zm00001d027546	1.16346e-05	-0.146914	0.062	0.146	0.65597	Phloem	Zm00001d027546
Zm00001d034166	1.17155e-05	-0.205479	0.185	0.296	0.660534	Phloem	Zm00001d034166
Zm00001d053608	1.19729e-05	0.104395	0.742	0.627	0.675046	Phloem	Zm00001d053608
Zm00001d006213	1.19857e-05	-0.389808	0.883	0.886	0.675763	Phloem	Zm00001d006213
Zm00001d044653	1.20564e-05	0.119929	0.8	0.732	0.67975	Phloem	Zm00001d044653
Zm00001d039283	1.22383e-05	-0.164647	0.083	0.175	0.690007	Phloem	Zm00001d039283
Zm00001d043217	1.22439e-05	0.10199	0.705	0.572	0.690321	Phloem	Zm00001d043217
Zm00001d034064	1.24498e-05	0.126421	0.532	0.42	0.701931	Phloem	Zm00001d034064
Zm00001d000168	1.26838e-05	-0.428164	0.388	0.493	0.715127	Phloem	Zm00001d000168
Zm00001d049510	1.2773e-05	0.102895	0.6	0.473	0.720154	Phloem	Zm00001d049510
Zm00001d002775	1.30154e-05	-0.162789	0.265	0.358	0.733821	Phloem	Zm00001d002775
Zm00001d002121	1.30929e-05	-0.146376	0.055	0.142	0.738193	Phloem	Zm00001d002121
Zm00001d016364	1.32676e-05	0.10207	0.738	0.583	0.74804	Phloem	Zm00001d016364
Zm00001d038380	1.32946e-05	0.140775	0.834	0.723	0.749565	Phloem	Zm00001d038380
Zm00001d030893	1.33571e-05	-0.152534	0.342	0.443	0.753085	Phloem	Zm00001d030893
Zm00001d025339	1.37965e-05	0.132022	0.865	0.803	0.777859	Phloem	Zm00001d025339
Zm00001d015301	1.43527e-05	0.109536	0.929	0.866	0.809217	Phloem	Zm00001d015301
Zm00001d026685	1.44858e-05	-0.137582	0.138	0.247	0.816722	Phloem	Zm00001d026685
Zm00001d051872	1.46475e-05	-0.122194	0.031	0.106	0.825838	Phloem	Zm00001d051872
Zm00001d022438	1.47743e-05	0.154214	0.898	0.814	0.832993	Phloem	Zm00001d022438
Zm00001d039859	1.4896e-05	0.128696	0.329	0.222	0.83985	Phloem	Zm00001d039859
Zm00001d046561	1.49699e-05	-0.159416	0.077	0.168	0.844019	Phloem	Zm00001d046561
Zm00001d009567	1.50017e-05	0.317614	0.538	0.433	0.845813	Phloem	Zm00001d009567
Zm00001d008744	1.50829e-05	-0.112518	0.046	0.124	0.850387	Phloem	Zm00001d008744
Zm00001d021160	1.53275e-05	0.184278	0.455	0.353	0.864181	Phloem	Zm00001d021160
Zm00001d039944	1.5454e-05	0.281464	0.569	0.457	0.871313	Phloem	Zm00001d039944
Zm00001d014520	1.5496e-05	0.103271	0.12	0.061	0.873678	Phloem	Zm00001d014520
Zm00001d054017	1.55533e-05	0.118289	0.778	0.651	0.876908	Phloem	Zm00001d054017
Zm00001d048403	1.56843e-05	0.101458	0.772	0.676	0.884298	Phloem	Zm00001d048403
Zm00001d052989	1.59524e-05	-0.110369	0.111	0.203	0.89941	Phloem	Zm00001d052989
GRMZM5G867512	1.63466e-05	0.129222	0.68	0.534	0.921637	Phloem	GRMZM5G867512
Zm00001d053119	1.65089e-05	-0.131562	0.065	0.153	0.930789	Phloem	Zm00001d053119
Zm00001d029856	1.67302e-05	0.164689	0.705	0.631	0.943267	Phloem	Zm00001d029856
Zm00001d031833	1.67305e-05	0.140292	0.662	0.541	0.943285	Phloem	Zm00001d031833
Zm00001d021642	1.71246e-05	-0.176996	0.16	0.249	0.965504	Phloem	Zm00001d021642
Zm00001d026548	1.75012e-05	-0.17192	0.135	0.233	0.986738	Phloem	Zm00001d026548
Zm00001d012667	1.75402e-05	-0.194576	0.148	0.255	0.988933	Phloem	Zm00001d012667
Zm00001d002258	1.75825e-05	-0.210561	0.72	0.692	0.991319	Phloem	Zm00001d002258
Zm00001d008327	1.77572e-05	-0.215928	0.283	0.397	1	Phloem	Zm00001d008327
Zm00001d027595	1.79548e-05	0.113642	0.991	0.975	1	Phloem	Zm00001d027595
Zm00001d045470	1.79575e-05	-0.141071	0.185	0.281	1	Phloem	Zm00001d045470
Zm00001d017168	1.82218e-05	-0.112163	0.071	0.16	1	Phloem	Zm00001d017168
Zm00001d020137	1.83114e-05	0.179886	0.618	0.514	1	Phloem	Zm00001d020137
Zm00001d033945	1.88051e-05	-0.160559	0.212	0.314	1	Phloem	Zm00001d033945
Zm00001d052950	1.90229e-05	0.168296	0.803	0.727	1	Phloem	Zm00001d052950
Zm00001d015025	1.94482e-05	0.124604	0.729	0.598	1	Phloem	Zm00001d015025
Zm00001d013721	1.95107e-05	0.11347	0.729	0.618	1	Phloem	Zm00001d013721
Zm00001d033589	1.97469e-05	0.123009	0.646	0.547	1	Phloem	Zm00001d033589
Zm00001d045269	1.99694e-05	-0.148989	0.062	0.143	1	Phloem	Zm00001d045269
Zm00001d024573	2.03338e-05	0.10825	0.674	0.545	1	Phloem	Zm00001d024573
Zm00001d044255	2.08994e-05	0.117428	0.766	0.638	1	Phloem	Zm00001d044255
Zm00001d046218	2.09277e-05	0.118372	0.12	0.061	1	Phloem	Zm00001d046218
Zm00001d011486	2.10756e-05	-0.156092	0.089	0.182	1	Phloem	Zm00001d011486
Zm00001d050218	2.14242e-05	-0.182392	0.274	0.375	1	Phloem	Zm00001d050218
Zm00001d050193	2.19408e-05	-0.134481	0.945	0.944	1	Phloem	Zm00001d050193
Zm00001d006057	2.21266e-05	-0.161669	0.182	0.273	1	Phloem	Zm00001d006057
Zm00001d007301	2.22228e-05	-0.238801	0.48	0.528	1	Phloem	Zm00001d007301
Zm00001d035440	2.2248e-05	0.115116	0.548	0.426	1	Phloem	Zm00001d035440
Zm00001d043152	2.26224e-05	-0.136531	0.138	0.231	1	Phloem	Zm00001d043152
Zm00001d021000	2.27852e-05	-0.412754	0.292	0.386	1	Phloem	Zm00001d021000
Zm00001d006064	2.33727e-05	0.136162	0.865	0.784	1	Phloem	Zm00001d006064
Zm00001d028918	2.35464e-05	0.151505	0.846	0.784	1	Phloem	Zm00001d028918
Zm00001d016443	2.37666e-05	-0.104021	0.077	0.166	1	Phloem	Zm00001d016443
Zm00001d047797	2.37996e-05	0.120618	0.886	0.817	1	Phloem	Zm00001d047797
Zm00001d005833	2.4079e-05	-0.117946	0.135	0.233	1	Phloem	Zm00001d005833
Zm00001d041569	2.44106e-05	0.133593	0.849	0.766	1	Phloem	Zm00001d041569
Zm00001d006166	2.44129e-05	-0.15921	0.295	0.39	1	Phloem	Zm00001d006166
Zm00001d001788	2.44425e-05	-0.162023	0.114	0.209	1	Phloem	Zm00001d001788
Zm00001d016619	2.49718e-05	0.128768	0.751	0.643	1	Phloem	Zm00001d016619
Zm00001d043692	2.53708e-05	-0.10496	0.074	0.157	1	Phloem	Zm00001d043692
Zm00001d052436	2.56613e-05	0.172236	0.794	0.695	1	Phloem	Zm00001d052436
Zm00001d010863	2.57274e-05	-0.147293	0.12	0.216	1	Phloem	Zm00001d010863
Zm00001d012957	2.5793e-05	-0.177232	0.191	0.285	1	Phloem	Zm00001d012957
Zm00001d003081	2.58878e-05	0.125623	0.883	0.804	1	Phloem	Zm00001d003081
Zm00001d047857	2.61636e-05	0.10618	0.569	0.458	1	Phloem	Zm00001d047857
Zm00001d010675	2.65496e-05	-0.122217	0.188	0.284	1	Phloem	Zm00001d010675
Zm00001d044422	2.65773e-05	-0.207621	0.434	0.495	1	Phloem	Zm00001d044422
Zm00001d013392	2.69053e-05	-0.292823	0.526	0.588	1	Phloem	Zm00001d013392
Zm00001d025406	2.70634e-05	-0.493019	0.557	0.557	1	Phloem	Zm00001d025406
Zm00001d051211	2.74662e-05	0.109433	0.76	0.661	1	Phloem	Zm00001d051211
Zm00001d002629	2.82084e-05	-0.122282	0.089	0.175	1	Phloem	Zm00001d002629
Zm00001d030892	2.88341e-05	-0.123406	0.111	0.207	1	Phloem	Zm00001d030892
Zm00001d036985	2.90765e-05	-0.220439	0.366	0.468	1	Phloem	Zm00001d036985
Zm00001d046574	2.9169e-05	0.168822	0.597	0.509	1	Phloem	Zm00001d046574
Zm00001d047720	2.93039e-05	0.111839	0.677	0.566	1	Phloem	Zm00001d047720
Zm00001d045735	2.95301e-05	-0.224591	0.142	0.241	1	Phloem	Zm00001d045735
Zm00001d039252	2.96262e-05	0.126296	0.751	0.65	1	Phloem	Zm00001d039252
Zm00001d022308	3.00425e-05	-0.177609	0.486	0.558	1	Phloem	Zm00001d022308
Zm00001d016655	3.028e-05	-0.167918	0.24	0.33	1	Phloem	Zm00001d016655
Zm00001d001785	3.05605e-05	-0.116463	0.098	0.186	1	Phloem	Zm00001d001785
Zm00001d021168	3.10274e-05	-0.166117	0.052	0.128	1	Phloem	Zm00001d021168
Zm00001d003784	3.18106e-05	-0.1502	0.342	0.429	1	Phloem	Zm00001d003784
Zm00001d051223	3.3441e-05	-0.262427	0.132	0.222	1	Phloem	Zm00001d051223
Zm00001d051981	3.38011e-05	-0.275759	0.412	0.482	1	Phloem	Zm00001d051981
Zm00001d016800	3.40459e-05	-0.102236	0.123	0.214	1	Phloem	Zm00001d016800
Zm00001d002051	3.4184e-05	-0.25846	0.36	0.454	1	Phloem	Zm00001d002051
Zm00001d012967	3.43438e-05	-0.141372	0.114	0.2	1	Phloem	Zm00001d012967
Zm00001d054043	3.47219e-05	-0.239025	0.492	0.543	1	Phloem	Zm00001d054043
Zm00001d049496	3.47281e-05	0.109449	0.68	0.553	1	Phloem	Zm00001d049496
Zm00001d010054	3.49077e-05	-0.141339	0.182	0.272	1	Phloem	Zm00001d010054
Zm00001d043025	3.56479e-05	-0.154295	0.089	0.17	1	Phloem	Zm00001d043025
ZeamMp044	3.66015e-05	-0.259557	0.095	0.186	1	Phloem	ZeamMp044
Zm00001d020748	3.74208e-05	-0.16216	0.295	0.394	1	Phloem	Zm00001d020748
Zm00001d020930	3.79076e-05	0.137785	0.625	0.53	1	Phloem	Zm00001d020930
Zm00001d047089	3.79255e-05	-0.157143	0.04	0.111	1	Phloem	Zm00001d047089
Zm00001d004009	3.79835e-05	0.12445	0.954	0.909	1	Phloem	Zm00001d004009
Zm00001d015921	3.86893e-05	-0.12839	0.055	0.133	1	Phloem	Zm00001d015921
Zm00001d036001	3.87673e-05	0.117792	0.689	0.597	1	Phloem	Zm00001d036001
Zm00001d043344	3.95068e-05	-0.190412	0.062	0.142	1	Phloem	Zm00001d043344
Zm00001d044527	3.99799e-05	0.108756	0.529	0.418	1	Phloem	Zm00001d044527
Zm00001d042480	4.01072e-05	-0.118641	0.092	0.183	1	Phloem	Zm00001d042480
Zm00001d014715	4.05934e-05	-0.177423	0.203	0.287	1	Phloem	Zm00001d014715
Zm00001d050054	4.08083e-05	0.110872	0.742	0.643	1	Phloem	Zm00001d050054
Zm00001d051544	4.12384e-05	-0.230786	0.151	0.252	1	Phloem	Zm00001d051544
Zm00001d032748	4.25816e-05	-0.28339	0.308	0.414	1	Phloem	Zm00001d032748
Zm00001d013751	4.39771e-05	-0.151247	0.923	0.905	1	Phloem	Zm00001d013751
Zm00001d021221	4.49683e-05	0.114185	0.612	0.493	1	Phloem	Zm00001d021221
Zm00001d037250	4.51535e-05	-0.169517	0.071	0.153	1	Phloem	Zm00001d037250
Zm00001d034602	4.57479e-05	-0.150975	0.785	0.77	1	Phloem	Zm00001d034602
Zm00001d012394	4.8014e-05	-0.107083	0.034	0.103	1	Phloem	Zm00001d012394
Zm00001d028572	4.87972e-05	-0.240013	0.468	0.523	1	Phloem	Zm00001d028572
Zm00001d000116	4.93956e-05	-0.120546	0.129	0.222	1	Phloem	Zm00001d000116
Zm00001d038883	5.03838e-05	-0.161573	0.228	0.312	1	Phloem	Zm00001d038883
[truncated: 43,790 more rows]

## Sheet: Markers_Sorghum
	p_val	avg_logFC	pct.1	pct.2	p_val_adj	cluster	gene
Zm00001d019069	0	2.47035	0.396	0.018	0	Phloem	SORBI-3002G066400
SORBI-3003G117600	0	2.04074	0.328	0.014	0	Phloem	SORBI-3003G117600
SORBI-3007G034000	0	0.998384	0.383	0.024	0	Phloem	SORBI-3007G034000
Zm00001d040275	0	0.993756	0.46	0.017	0	Phloem	SORBI-3003G115200
Zm00001d048799	0	0.964695	0.458	0.02	0	Phloem	SORBI-3005G194300
Zm00001d011740	0	0.656572	0.303	0.011	0	Phloem	SORBI-3003G280600
SORBI-3007G028700	0	0.629234	0.163	0.001	0	Phloem	SORBI-3007G028700
Zm00001d049485	0	0.525948	0.267	0.006	0	Phloem	SORBI-3007G059500
Zm00001d050811	0	0.471819	0.297	0.004	0	Phloem	SORBI-3004G182600
SORBI-3005G188600	0	0.466515	0.189	0.001	0	Phloem	SORBI-3005G188600
Zm00001d043144	0	0.434945	0.273	0.01	0	Phloem	SORBI-3003G330300
SORBI-3009G187400	0	0.433874	0.282	0.012	0	Phloem	SORBI-3009G187400
SORBI-3009G120200	0	0.416292	0.184	0.002	0	Phloem	SORBI-3009G120200
Zm00001d008646	0	0.38971	0.195	0.001	0	Phloem	SORBI-3003G062500
Zm00001d048979	0	0.23227	0.163	0.001	0	Phloem	SORBI-3005G089600
SORBI-3002G197400	2.91882e-305	0.719034	0.358	0.024	1.64566e-300	Phloem	SORBI-3002G197400
SORBI-3001G351200	9.35421e-299	0.265331	0.191	0.004	5.27399e-294	Phloem	SORBI-3001G351200
Zm00001d046947	1.68696e-294	0.425513	0.244	0.009	9.51125e-290	Phloem	SORBI-3010G220000
Zm00001d005895	5.08543e-291	0.448574	0.208	0.006	2.86721e-286	Phloem	SORBI-3002G226400
Zm00001d012814	1.75387e-275	0.184096	0.163	0.003	9.88847e-271	Phloem	SORBI-3001G004300
SORBI-3009G120000	1.63157e-274	0.289652	0.208	0.006	9.19897e-270	Phloem	SORBI-3009G120000
Zm00001d044460	1.06936e-264	0.172826	0.127	0.001	6.02917e-260	Phloem	SORBI-3003G218500
Zm00001d029844	2.71693e-256	0.319186	0.201	0.007	1.53183e-251	Phloem	SORBI-3001G307800
Zm00001d027881	1.41617e-243	0.132818	0.112	0	7.98452e-239	Phloem	SORBI-3001G484900
Zm00001d051611	2.90441e-220	0.5065	0.286	0.022	1.63753e-215	Phloem	SORBI-3004G262800
Zm00001d036804	1.01714e-214	0.395779	0.225	0.012	5.73474e-210	Phloem	SORBI-3010G191800
Zm00001d004874	1.20069e-213	0.524354	0.309	0.028	6.76959e-209	Phloem	SORBI-3005G044500
Zm00001d039637	1.13095e-210	0.437136	0.235	0.014	6.37641e-206	Phloem	SORBI-3003G046800
SORBI-3009G038100	6.41869e-202	0.276418	0.108	0.001	3.61892e-197	Phloem	SORBI-3009G038100
Zm00001d022478	1.34528e-184	0.208806	0.117	0.002	7.58481e-180	Phloem	SORBI-3002G411900
Zm00001d030339	4.24051e-179	0.17844	0.119	0.003	2.39084e-174	Phloem	SORBI-3001G264700
Zm00001d006882	8.70025e-179	0.278983	0.216	0.015	4.90529e-174	Phloem	SORBI-3002G376700
SORBI-3004G228500	1.37603e-174	1.16182	0.35	0.047	7.75819e-170	Phloem	SORBI-3004G228500
Zm00001d023477	6.98648e-160	0.54689	0.294	0.033	3.93905e-155	Phloem	SORBI-3008G043700
Zm00001d024802	1.53895e-159	0.402414	0.117	0.003	8.67675e-155	Phloem	SORBI-3009G038300
Zm00001d011789	8.20836e-157	0.194222	0.123	0.004	4.62796e-152	Phloem	SORBI-3003G442900
Zm00001d022090	1.02323e-155	1.31668	0.439	0.084	5.76907e-151	Phloem	SORBI-3002G369000
Zm00001d020882	9.21995e-154	0.115729	0.121	0.004	5.1983e-149	Phloem	SORBI-3002G242800
Zm00001d015407	2.94856e-148	0.231774	0.169	0.01	1.66243e-143	Phloem	SORBI-3004G058700
SORBI-3003G167500	5.09665e-148	0.731692	0.343	0.051	2.87354e-143	Phloem	SORBI-3003G167500
SORBI-3003G132300	7.01314e-148	0.531576	0.297	0.039	3.95408e-143	Phloem	SORBI-3003G132300
Zm00001d017386	2.65756e-143	0.422251	0.28	0.035	1.49836e-138	Phloem	SORBI-3004G303300
Zm00001d022637	2.7037e-143	0.344535	0.248	0.027	1.52438e-138	Phloem	SORBI-3002G278300
Zm00001d053404	5.65099e-141	0.492408	0.314	0.044	3.18608e-136	Phloem	SORBI-3004G113100
SORBI-3002G404100	6.2021e-139	0.546239	0.341	0.052	3.49681e-134	Phloem	SORBI-3002G404100
Zm00001d037550	5.90537e-133	0.869857	0.32	0.05	3.32951e-128	Phloem	SORBI-3009G055100
Zm00001d027500	3.20729e-131	1.14201	0.627	0.195	1.8083e-126	Phloem	SORBI-3001G518700
SORBI-3003G390900	2.41981e-129	0.554714	0.258	0.033	1.36431e-124	Phloem	SORBI-3003G390900
SORBI-3004G193500	8.14941e-123	1.17402	0.417	0.094	4.59472e-118	Phloem	SORBI-3004G193500
SORBI-3004G152300	1.60775e-116	0.365942	0.278	0.042	9.06463e-112	Phloem	SORBI-3004G152300
Zm00001d046112	2.17565e-115	0.821321	0.362	0.077	1.22665e-110	Phloem	SORBI-3010G153900
SORBI-3004G068300	5.15438e-115	0.312814	0.197	0.021	2.90609e-110	Phloem	SORBI-3004G068300
SORBI-3005G056201	5.43205e-113	0.183354	0.157	0.013	3.06264e-108	Phloem	SORBI-3005G056201
SORBI-3009G200200	3.19201e-112	0.438813	0.273	0.041	1.79969e-107	Phloem	SORBI-3009G200200
Zm00001d053897	5.23774e-108	1.71618	0.356	0.081	2.95309e-103	Phloem	SORBI-3004G017800
Zm00001d042857	1.31714e-107	0.783422	0.341	0.072	7.42614e-103	Phloem	SORBI-3003G356700
Zm00001d009626	1.15246e-105	0.146236	0.121	0.008	6.49767e-101	Phloem	SORBI-3009G238600
Zm00001d049813	1.28954e-96	0.779449	0.367	0.087	7.27058e-92	Phloem	SORBI-3007G194800
SORBI-3002G162800	4.54506e-95	0.81642	0.271	0.05	2.56255e-90	Phloem	SORBI-3002G162800
SORBI-3009G027200	9.99333e-94	0.355584	0.242	0.039	5.63434e-89	Phloem	SORBI-3009G027200
SORBI-3001G290400	3.34694e-86	1.03866	0.324	0.077	1.88704e-81	Phloem	SORBI-3001G290400
SORBI-3003G112200	1.75829e-85	0.159908	0.18	0.023	9.9134e-81	Phloem	SORBI-3003G112200
Zm00001d052172	1.56585e-78	0.375598	0.153	0.018	8.82842e-74	Phloem	SORBI-3004G308000
Zm00001d016470	2.40401e-78	1.42041	0.422	0.148	1.35541e-73	Phloem	SORBI-3004G141100
SORBI-3003G137200	5.21488e-78	0.471496	0.282	0.062	2.9402e-73	Phloem	SORBI-3003G137200
SORBI-3008G124400	2.64585e-77	0.256429	0.191	0.029	1.49176e-72	Phloem	SORBI-3008G124400
SORBI-3009G177800	4.24754e-76	0.164509	0.144	0.017	2.3948e-71	Phloem	SORBI-3009G177800
Zm00001d024778	3.27063e-74	0.949096	0.35	0.096	1.84401e-69	Phloem	SORBI-3009G036000
Zm00001d006374	8.03111e-74	0.388074	0.278	0.063	4.52802e-69	Phloem	SORBI-3002G303700
Zm00001d027440	8.92267e-74	0.357222	0.284	0.065	5.03069e-69	Phloem	SORBI-3001G525300
Zm00001d011811	5.92991e-73	0.232747	0.212	0.038	3.34334e-68	Phloem	SORBI-3003G438200
Zm00001d015131	3.68157e-71	0.516594	0.318	0.084	2.07571e-66	Phloem	SORBI-3004G028900
Zm00001d015917	1.98307e-70	0.341755	0.269	0.063	1.11807e-65	Phloem	SORBI-3004G133400
SORBI-3010G082600	2.25415e-70	1.69621	0.396	0.141	1.27091e-65	Phloem	SORBI-3010G082600
SORBI-3010G115300	1.13421e-69	0.220043	0.142	0.017	6.39481e-65	Phloem	SORBI-3010G115300
SORBI-3001G425100	5.28401e-69	0.234281	0.216	0.04	2.97917e-64	Phloem	SORBI-3001G425100
SORBI-3003G035100	2.62437e-68	0.156551	0.146	0.019	1.47964e-63	Phloem	SORBI-3003G035100
Zm00001d020345	4.83811e-67	0.291254	0.227	0.046	2.72777e-62	Phloem	SORBI-3002G189700
SORBI-3006G233500	7.13545e-67	0.334941	0.237	0.05	4.02304e-62	Phloem	SORBI-3006G233500
SORBI-3002G366000	4.07951e-62	0.179318	0.178	0.03	2.30007e-57	Phloem	SORBI-3002G366000
Zm00001d009373	6.85363e-62	0.929311	0.508	0.219	3.86415e-57	Phloem	SORBI-3003G183300
Zm00001d003569	9.72842e-62	0.198007	0.18	0.032	5.48498e-57	Phloem	SORBI-3006G092700
Zm00001d020794.2	2.74422e-61	1.79659	0.398	0.159	1.54722e-56	Phloem	Zm00001d020794.2
SORBI-3003G424500	4.724e-59	2.50109	0.4	0.169	2.66344e-54	Phloem	SORBI-3003G424500
SORBI-3003G292200	6.10828e-59	0.15142	0.14	0.02	3.44391e-54	Phloem	SORBI-3003G292200
Zm00001d018452.4	5.09304e-58	0.372356	0.265	0.068	2.87151e-53	Phloem	Zm00001d018452.4
Zm00001d034497	9.58895e-58	0.352647	0.195	0.04	5.40634e-53	Phloem	SORBI-3001G051800
Zm00001d038288	3.39005e-57	1.93098	0.364	0.138	1.91135e-52	Phloem	SORBI-3009G154200
Zm00001d033564.1	9.15373e-57	0.408434	0.242	0.061	5.16096e-52	Phloem	Zm00001d033564.1
SORBI-3004G297200	1.57469e-55	0.545891	0.326	0.104	8.87828e-51	Phloem	SORBI-3004G297200
Zm00001d029604	2.75128e-55	0.309729	0.263	0.071	1.5512e-50	Phloem	SORBI-3001G328100
SORBI-3002G183400	8.84093e-55	0.429601	0.218	0.051	4.9846e-50	Phloem	SORBI-3002G183400
SORBI-3003G301900	9.379e-53	0.268806	0.294	0.087	5.28797e-48	Phloem	SORBI-3003G301900
Zm00001d031510	8.62179e-52	0.891449	0.32	0.111	4.86105e-47	Phloem	SORBI-3007G204700
Zm00001d029801	1.09815e-51	0.416849	0.258	0.071	6.19148e-47	Phloem	SORBI-3001G310300
SORBI-3009G234000	1.7594e-51	0.209964	0.176	0.035	9.91967e-47	Phloem	SORBI-3009G234000
Zm00001d044584	9.97399e-51	0.385855	0.32	0.104	5.62344e-46	Phloem	SORBI-3003G179600
SORBI-3004G013300	1.60323e-50	0.766546	0.373	0.153	9.03916e-46	Phloem	SORBI-3004G013300
Zm00001d038065	2.22945e-50	0.681383	0.35	0.121	1.25698e-45	Phloem	SORBI-3009G121900
SORBI-3009G166801	5.02025e-49	1.25341	0.333	0.124	2.83046e-44	Phloem	SORBI-3009G166801
Zm00001d003999	6.25667e-48	0.303894	0.314	0.101	3.52757e-43	Phloem	SORBI-3006G046900
Zm00001d047774	9.28275e-48	0.13586	0.178	0.037	5.23371e-43	Phloem	SORBI-3001G414650
SORBI-3007G201100	1.90398e-47	0.540872	0.307	0.107	1.07348e-42	Phloem	SORBI-3007G201100
SORBI-3003G299800	1.13908e-46	0.518705	0.271	0.083	6.42226e-42	Phloem	SORBI-3003G299800
Zm00001d003262	1.42447e-46	0.122969	0.148	0.028	8.03129e-42	Phloem	SORBI-3006G125400
SORBI-3002G227900	5.97548e-46	0.522214	0.305	0.103	3.36903e-41	Phloem	SORBI-3002G227900
Zm00001d030009	4.42971e-45	0.315808	0.167	0.035	2.49751e-40	Phloem	SORBI-3001G292000
SORBI-3007G087200	9.62931e-45	0.212589	0.203	0.052	5.4291e-40	Phloem	SORBI-3007G087200
Zm00001d041910	1.80801e-43	0.271371	0.189	0.047	1.01937e-38	Phloem	SORBI-3008G047900
SORBI-3001G212000	5.80274e-43	0.623704	0.278	0.093	3.27164e-38	Phloem	SORBI-3001G212000
Zm00001d020969	3.97299e-42	0.220503	0.206	0.054	2.24001e-37	Phloem	SORBI-3002G251100
Zm00001d045606	7.3627e-42	0.440966	0.294	0.105	4.15116e-37	Phloem	SORBI-3010G001900
Zm00001d043263	8.5584e-42	0.108946	0.117	0.02	4.82531e-37	Phloem	SORBI-3003G318700
SORBI-3007G006300	9.61668e-42	0.323277	0.273	0.092	5.42198e-37	Phloem	SORBI-3007G006300
SORBI-3002G278400	1.25784e-41	0.150338	0.104	0.016	7.09185e-37	Phloem	SORBI-3002G278400
SORBI-3002G200700	1.54868e-41	0.212665	0.191	0.05	8.73161e-37	Phloem	SORBI-3002G200700
Zm00001d024102	1.71089e-41	0.163078	0.178	0.043	9.64618e-37	Phloem	SORBI-3007G097700
Zm00001d052612	2.10773e-41	0.159626	0.136	0.027	1.18836e-36	Phloem	SORBI-3005G043000
SORBI-3001G357900	1.05607e-40	0.247922	0.25	0.08	5.95423e-36	Phloem	SORBI-3001G357900
SORBI-3002G120300	1.34872e-40	0.739861	0.345	0.141	7.60424e-36	Phloem	SORBI-3002G120300
Zm00001d034756	2.11507e-40	0.230315	0.163	0.037	1.1925e-35	Phloem	SORBI-3001G023300
Zm00001d027652	5.11114e-40	-0.747784	0.742	0.857	2.88171e-35	Phloem	SORBI-3001G505100
SORBI-3007G171950	1.04679e-39	0.151679	0.157	0.036	5.90193e-35	Phloem	SORBI-3007G171950
Zm00001d027966	2.70398e-39	0.494206	0.417	0.201	1.52453e-34	Phloem	SORBI-3001G478000
Zm00001d003931	2.90745e-39	0.355853	0.254	0.086	1.63925e-34	Phloem	SORBI-3006G053700
Zm00001d004467	3.28968e-39	0.546454	0.28	0.098	1.85476e-34	Phloem	SORBI-3006G012200
Zm00001d014499	8.69008e-39	0.162593	0.178	0.044	4.89955e-34	Phloem	SORBI-3010G236100
Zm00001d047913	3.57394e-38	0.425546	0.28	0.1	2.01502e-33	Phloem	SORBI-3001G436000
SORBI-3006G215000	2.13538e-37	0.237999	0.275	0.095	1.20395e-32	Phloem	SORBI-3006G215000
Zm00001d010159	2.53375e-37	0.186345	0.159	0.038	1.42855e-32	Phloem	SORBI-3009G153000
SORBI-3003G378000	3.64687e-37	0.157441	0.174	0.043	2.05614e-32	Phloem	SORBI-3003G378000
Zm00001d038296	4.14868e-37	0.163751	0.142	0.032	2.33907e-32	Phloem	SORBI-3009G155050
Zm00001d021160	5.65747e-37	1.18371	0.345	0.161	3.18974e-32	Phloem	SORBI-3002G263400
Zm00001d042225	6.31666e-37	0.234893	0.222	0.069	3.56139e-32	Phloem	SORBI-3003G415900
SORBI-3002G311300	6.34914e-37	0.282033	0.246	0.081	3.57971e-32	Phloem	SORBI-3002G311300
Zm00001d018244	7.68536e-37	0.505369	0.246	0.083	4.33308e-32	Phloem	SORBI-3004G315600
Zm00001d014391	1.2794e-36	0.145119	0.165	0.042	7.21336e-32	Phloem	SORBI-3010G227800
Zm00001d052668	1.88815e-36	0.277098	0.275	0.101	1.06456e-31	Phloem	SORBI-3005G137900
Zm00001d042022	2.01794e-36	0.558526	0.35	0.151	1.13773e-31	Phloem	SORBI-3003G436800
SORBI-3009G122000	6.59393e-36	0.182252	0.165	0.042	3.71773e-31	Phloem	SORBI-3009G122000
Zm00001d021170	1.90697e-35	0.160692	0.197	0.056	1.07517e-30	Phloem	SORBI-3002G266300
Zm00001d013113	4.70492e-35	0.228961	0.246	0.084	2.65268e-30	Phloem	SORBI-3001G064800
Zm00001d042600	5.20923e-35	0.381221	0.343	0.149	2.93702e-30	Phloem	SORBI-3003G380300
SORBI-3003G098500	9.60117e-35	0.297432	0.286	0.11	5.41323e-30	Phloem	SORBI-3003G098500
SORBI-3001G464600	1.99302e-34	0.159089	0.182	0.051	1.12369e-29	Phloem	SORBI-3001G464600
SORBI-3004G313100	2.6079e-34	1.11917	0.358	0.167	1.47036e-29	Phloem	SORBI-3004G313100
Zm00001d019173	3.52472e-34	0.268163	0.303	0.121	1.98727e-29	Phloem	SORBI-3002G076866
Zm00001d032517	6.20445e-34	0.715632	0.352	0.17	3.49813e-29	Phloem	SORBI-3001G200500
Zm00001d031375.1	6.42918e-34	0.502944	0.222	0.073	3.62483e-29	Phloem	Zm00001d031375.1
SORBI-3003G376200	1.03018e-33	0.502437	0.258	0.095	5.80827e-29	Phloem	SORBI-3003G376200
SORBI-3001G304500	1.35284e-33	0.299859	0.364	0.155	7.62745e-29	Phloem	SORBI-3001G304500
Zm00001d048611	1.10862e-32	0.701939	0.269	0.102	6.25051e-28	Phloem	SORBI-3005G228700
SORBI-3009G239500	1.97044e-32	0.671543	0.383	0.193	1.11095e-27	Phloem	SORBI-3009G239500
Zm00001d053736.1	2.71477e-32	0.427253	0.15	0.039	1.53061e-27	Phloem	Zm00001d053736.1
Zm00001d043511	2.9952e-32	0.282304	0.352	0.154	1.68872e-27	Phloem	SORBI-3003G291800
Zm00001d016691	3.85715e-32	1.07033	0.396	0.216	2.1747e-27	Phloem	SORBI-3004G164200
SORBI-3004G312900	4.06626e-32	0.121833	0.163	0.044	2.2926e-27	Phloem	SORBI-3004G312900
Zm00001d024778.1	1.10919e-31	1.29331	0.337	0.159	6.2537e-27	Phloem	Zm00001d024778.1
SORBI-3010G176600	1.29909e-31	1.10455	0.371	0.191	7.3244e-27	Phloem	SORBI-3010G176600
Zm00001d016568	2.9203e-31	0.201399	0.199	0.064	1.6465e-26	Phloem	SORBI-3004G155300
SORBI-3007G002700	7.83303e-31	0.288064	0.189	0.06	4.41634e-26	Phloem	SORBI-3007G002700
Zm00001d036918	3.55146e-30	0.720651	0.381	0.197	2.00235e-25	Phloem	SORBI-3010G180600
Zm00001d023529	3.80383e-30	0.688183	0.261	0.103	2.14464e-25	Phloem	SORBI-3008G049200
Zm00001d018712	9.45129e-30	0.109928	0.174	0.051	5.32873e-25	Phloem	SORBI-3002G017800
Zm00001d005495	2.08353e-29	0.1976	0.235	0.087	1.17472e-24	Phloem	SORBI-3002G103500
SORBI-3004G295100	3.40362e-29	-1.46439	0.388	0.57	1.91899e-24	Phloem	SORBI-3004G295100
Zm00001d034760	5.88811e-29	0.42414	0.735	0.649	3.31978e-24	Phloem	SORBI-3001G022900
Zm00001d016567	6.30809e-29	0.315715	0.356	0.159	3.55656e-24	Phloem	SORBI-3004G155200
Zm00001d028428	6.33354e-29	0.665129	0.328	0.156	3.57092e-24	Phloem	SORBI-3001G435800
Zm00001d047981	7.50779e-29	0.595926	0.284	0.12	4.23297e-24	Phloem	SORBI-3001G443800
Zm00001d039997	7.74419e-29	0.228636	0.252	0.099	4.36625e-24	Phloem	SORBI-3003G086200
SORBI-3003G269200	1.52474e-28	0.769952	0.511	0.344	8.59664e-24	Phloem	SORBI-3003G269200
Zm00001d007034	1.67916e-28	0.285019	0.275	0.112	9.46727e-24	Phloem	SORBI-3002G393700
SORBI-3006G008900	1.68516e-28	0.423888	0.388	0.201	9.50109e-24	Phloem	SORBI-3006G008900
SORBI-3002G225300	3.33237e-28	0.352132	0.288	0.122	1.87882e-23	Phloem	SORBI-3002G225300
Zm00001d013325	3.81478e-28	0.173827	0.242	0.089	2.15081e-23	Phloem	SORBI-3001G098700
Zm00001d044546	6.38925e-28	0.309118	0.242	0.093	3.60232e-23	Phloem	SORBI-3003G183000
SORBI-3001G212100	1.01059e-27	0.227366	0.148	0.042	5.69781e-23	Phloem	SORBI-3001G212100
Zm00001d042116	1.91942e-27	0.104425	0.108	0.024	1.08219e-22	Phloem	SORBI-3003G424400
Zm00001d014911	3.59673e-27	0.238497	0.133	0.035	2.02787e-22	Phloem	SORBI-3010G279800
SORBI-3004G222800	4.73484e-27	0.237841	0.297	0.131	2.66955e-22	Phloem	SORBI-3004G222800
Zm00001d026308	7.8564e-27	0.377648	0.322	0.15	4.42952e-22	Phloem	SORBI-3006G216400
SORBI-3004G173500	1.18855e-26	0.505454	0.375	0.206	6.70115e-22	Phloem	SORBI-3004G173500
SORBI-3002G120400	1.664e-26	0.144748	0.125	0.033	9.38178e-22	Phloem	SORBI-3002G120400
SORBI-3001G141600	1.72177e-26	0.124055	0.117	0.029	9.70752e-22	Phloem	SORBI-3001G141600
SORBI-3001G111700	2.05285e-26	0.254689	0.265	0.111	1.15742e-21	Phloem	SORBI-3001G111700
Zm00001d004972	3.66484e-26	0.202372	0.138	0.039	2.06627e-21	Phloem	SORBI-3005G029200
SORBI-3008G135300	4.69523e-26	0.219041	0.235	0.088	2.64722e-21	Phloem	SORBI-3008G135300
Zm00001d045893	4.95355e-26	0.147055	0.182	0.061	2.79286e-21	Phloem	SORBI-3010G132100
SORBI-3001G109400	5.06268e-26	0.162682	0.133	0.037	2.85439e-21	Phloem	SORBI-3001G109400
Zm00001d012659	6.1282e-26	0.177413	0.22	0.084	3.45514e-21	Phloem	SORBI-3003G308800
Zm00001d025542	1.28417e-25	0.145063	0.227	0.082	7.24029e-21	Phloem	SORBI-3006G097200
SORBI-3009G259200	1.99342e-25	0.482688	0.735	0.722	1.12391e-20	Phloem	SORBI-3009G259200
Zm00001d007581	2.08863e-25	0.223658	0.265	0.112	1.17759e-20	Phloem	SORBI-3005G172400
Zm00001d027405	2.48425e-25	0.217291	0.102	0.023	1.40064e-20	Phloem	SORBI-3001G528300
SORBI-3003G103300	1.02785e-24	0.20106	0.212	0.079	5.7951e-20	Phloem	SORBI-3003G103300
SORBI-3009G014400	1.12225e-24	0.111368	0.11	0.027	6.32734e-20	Phloem	SORBI-3009G014400
SORBI-3003G152000	4.42454e-24	0.377385	0.358	0.184	2.4946e-19	Phloem	SORBI-3003G152000
Zm00001d037733	5.3885e-24	0.521054	0.343	0.177	3.03809e-19	Phloem	SORBI-3009G075900
Zm00001d034073	6.84324e-24	0.124185	0.157	0.05	3.85829e-19	Phloem	SORBI-3001G084000
Zm00001d045565	8.4495e-24	0.932836	0.413	0.265	4.76391e-19	Phloem	SORBI-3010G007200
Zm00001d038552	9.74391e-24	0.149326	0.159	0.052	5.49371e-19	Phloem	SORBI-3009G181400
Zm00001d004463	1.68901e-23	0.692849	0.441	0.29	9.52281e-19	Phloem	SORBI-3006G012900
SORBI-3004G225900	1.85821e-23	0.297884	0.322	0.159	1.04768e-18	Phloem	SORBI-3004G225900
SORBI-3002G113800	2.14817e-23	0.506728	0.595	0.471	1.21116e-18	Phloem	SORBI-3002G113800
SORBI-3003G335300	2.33695e-23	0.392792	0.371	0.204	1.3176e-18	Phloem	SORBI-3003G335300
Zm00001d047881	3.50171e-23	0.307062	0.29	0.134	1.9743e-18	Phloem	SORBI-3001G430700
SORBI-3004G018400	3.83933e-23	0.347715	0.913	0.864	2.16466e-18	Phloem	SORBI-3004G018400
SORBI-3004G097100	4.79159e-23	0.519569	0.314	0.16	2.70154e-18	Phloem	SORBI-3004G097100
Zm00001d051988	5.35757e-23	0.118804	0.148	0.048	3.02065e-18	Phloem	SORBI-3004G337000
SORBI-3007G202000	5.6917e-23	0.182878	0.138	0.04	3.20904e-18	Phloem	SORBI-3007G202000
SORBI-3006G078900	7.3595e-23	0.587157	0.377	0.209	4.14936e-18	Phloem	SORBI-3006G078900
SORBI-3003G356900	7.55414e-23	0.23864	0.21	0.083	4.2591e-18	Phloem	SORBI-3003G356900
Zm00001d025830	1.27098e-22	0.146857	0.163	0.056	7.16594e-18	Phloem	SORBI-3006G142775
SORBI-3001G488700	1.47554e-22	0.828835	0.373	0.238	8.31922e-18	Phloem	SORBI-3001G488700
SORBI-3001G146000	1.59072e-22	-0.457636	0.197	0.436	8.96865e-18	Phloem	SORBI-3001G146000
SORBI-3002G124700	2.55324e-22	-0.546629	0.267	0.499	1.43954e-17	Phloem	SORBI-3002G124700
Zm00001d028374	2.73664e-22	0.616518	0.341	0.185	1.54295e-17	Phloem	SORBI-3001G441100
Zm00001d052766	3.10568e-22	0.207258	0.214	0.087	1.75101e-17	Phloem	SORBI-3007G002600
SORBI-3005G101500	3.3009e-22	0.385878	0.157	0.053	1.86108e-17	Phloem	SORBI-3005G101500
Zm00001d016501	3.41793e-22	0.154406	0.242	0.102	1.92706e-17	Phloem	SORBI-3004G146800
SORBI-3005G210000	3.72078e-22	0.126684	0.197	0.076	2.09781e-17	Phloem	SORBI-3005G210000
Zm00001d026642	8.15758e-22	-0.477125	0.178	0.404	4.59933e-17	Phloem	SORBI-3006G271300
Zm00001d028815.1	9.91119e-22	1.35297	0.369	0.233	5.58803e-17	Phloem	Zm00001d028815.1
Zm00001d002837	1.35397e-21	0.135887	0.18	0.065	7.63382e-17	Phloem	SORBI-3006G159600
Zm00001d041746.1	1.39111e-21	0.168709	0.201	0.082	7.84324e-17	Phloem	Zm00001d041746.1
Zm00001d044769	1.6926e-21	1.28841	0.379	0.249	9.54304e-17	Phloem	SORBI-3010G099600
Zm00001d015029	1.81881e-21	0.198774	0.29	0.136	1.02546e-16	Phloem	SORBI-3004G016400
Zm00001d031128	1.88697e-21	-0.345534	0.805	0.853	1.0639e-16	Phloem	SORBI-3008G178800
SORBI-3004G027900	2.47934e-21	0.391796	0.362	0.197	1.39788e-16	Phloem	SORBI-3004G027900
SORBI-3010G211600	3.08663e-21	0.466685	0.303	0.152	1.74027e-16	Phloem	SORBI-3010G211600
Zm00001d038594	3.18258e-21	0.657781	0.415	0.274	1.79437e-16	Phloem	SORBI-3009G185800
Zm00001d025296	4.14411e-21	0.523982	0.324	0.172	2.33649e-16	Phloem	SORBI-3006G059700
Zm00001d038652	4.24645e-21	0.607932	0.559	0.476	2.39419e-16	Phloem	SORBI-3009G190800
SORBI-3001G388250	5.35061e-21	0.298329	0.36	0.197	3.01673e-16	Phloem	SORBI-3001G388250
Zm00001d046472	5.69317e-21	0.253142	0.339	0.179	3.20986e-16	Phloem	SORBI-3010G178200
Zm00001d052335	6.24895e-21	0.758454	0.367	0.21	3.52322e-16	Phloem	SORBI-3005G011300
SORBI-3008G129300	7.10013e-21	0.827832	0.636	0.596	4.00312e-16	Phloem	SORBI-3008G129300
SORBI-3002G041900	9.37457e-21	0.143601	0.174	0.063	5.28548e-16	Phloem	SORBI-3002G041900
Zm00001d033969	9.48526e-21	0.20547	0.292	0.145	5.34788e-16	Phloem	SORBI-3001G095000
SORBI-3001G449700	9.53124e-21	-0.689007	0.174	0.371	5.37381e-16	Phloem	SORBI-3001G449700
SORBI-3002G313800	1.00636e-20	0.399564	0.447	0.281	5.67395e-16	Phloem	SORBI-3002G313800
Zm00001d046811	1.26677e-20	0.298036	0.301	0.154	7.1422e-16	Phloem	SORBI-3010G210700
Zm00001d034491	1.41046e-20	0.517452	0.513	0.395	7.95229e-16	Phloem	SORBI-3001G052900
Zm00001d049081	1.96793e-20	0.101138	0.117	0.034	1.10954e-15	Phloem	SORBI-3005G105300
SORBI-3001G317200	2.20641e-20	0.792958	0.367	0.214	1.244e-15	Phloem	SORBI-3001G317200
Zm00001d003846	2.94176e-20	0.12422	0.159	0.057	1.6586e-15	Phloem	SORBI-3006G065200
Zm00001d006816	3.05306e-20	0.113695	0.153	0.052	1.72134e-15	Phloem	SORBI-3002G368800
SORBI-3001G192800	3.43894e-20	0.554987	0.337	0.186	1.93891e-15	Phloem	SORBI-3001G192800
SORBI-3001G175800	5.70171e-20	0.17435	0.267	0.125	3.21468e-15	Phloem	SORBI-3001G175800
SORBI-3006G159300	6.64506e-20	0.671054	0.413	0.271	3.74655e-15	Phloem	SORBI-3006G159300
Zm00001d023651	6.7049e-20	0.725964	0.386	0.251	3.78029e-15	Phloem	SORBI-3008G097100
SORBI-3005G097900	6.71628e-20	0.138653	0.193	0.076	3.78671e-15	Phloem	SORBI-3005G097900
SORBI-3010G165500	6.74991e-20	0.390346	0.356	0.201	3.80567e-15	Phloem	SORBI-3010G165500
Zm00001d034588	7.24728e-20	0.413408	0.364	0.212	4.08609e-15	Phloem	SORBI-3001G042500
Zm00001d031892	8.57184e-20	0.100437	0.15	0.053	4.83289e-15	Phloem	SORBI-3007G165701
Zm00001d005343	8.7165e-20	-0.368747	0.129	0.329	4.91445e-15	Phloem	SORBI-3002G134400
Zm00001d018090	9.74973e-20	-0.367687	0.14	0.345	5.497e-15	Phloem	SORBI-3004G232300
SORBI-3008G101400	9.76136e-20	0.170627	0.252	0.114	5.50355e-15	Phloem	SORBI-3008G101400
SORBI-3006G147200	1.02546e-19	0.14359	0.144	0.05	5.78165e-15	Phloem	SORBI-3006G147200
SORBI-3009G248500	1.23272e-19	0.211172	0.195	0.081	6.95022e-15	Phloem	SORBI-3009G248500
SORBI-3003G119500	1.31867e-19	0.146029	0.419	0.223	7.43479e-15	Phloem	SORBI-3003G119500
SORBI-3003G322900	1.36379e-19	0.320294	0.305	0.161	7.68918e-15	Phloem	SORBI-3003G322900
Zm00001d052586	1.67679e-19	0.265342	0.271	0.133	9.45392e-15	Phloem	SORBI-3005G041300
Zm00001d018498	1.73404e-19	0.432169	0.371	0.217	9.77666e-15	Phloem	SORBI-3004G347800
Zm00001d025681	1.81184e-19	0.186497	0.254	0.118	1.02153e-14	Phloem	SORBI-3006G119800
Zm00001d032287	1.85402e-19	0.455421	0.314	0.162	1.04532e-14	Phloem	SORBI-3007G122800
SORBI-3003G443300	1.88901e-19	-0.415813	0.379	0.568	1.06504e-14	Phloem	SORBI-3003G443300
SORBI-3006G170600	2.37925e-19	-0.578314	0.074	0.253	1.34144e-14	Phloem	SORBI-3006G170600
SORBI-3002G039100	2.59292e-19	0.154831	0.216	0.094	1.46191e-14	Phloem	SORBI-3002G039100
SORBI-3010G075300	3.25582e-19	0.370789	0.242	0.113	1.83566e-14	Phloem	SORBI-3010G075300
Zm00001d010375	4.29391e-19	0.294768	0.284	0.142	2.42095e-14	Phloem	SORBI-3009G071800
SORBI-3007G136100	4.35229e-19	0.420289	0.475	0.33	2.45386e-14	Phloem	SORBI-3007G136100
SORBI-3006G148000	4.44808e-19	0.461129	0.415	0.266	2.50787e-14	Phloem	SORBI-3006G148000
SORBI-3010G147600	4.46027e-19	0.133817	0.182	0.073	2.51474e-14	Phloem	SORBI-3010G147600
Zm00001d015308	6.50566e-19	0.250615	0.233	0.107	3.66796e-14	Phloem	SORBI-3004G047700
Zm00001d032405	7.3792e-19	-0.438647	0.225	0.461	4.16047e-14	Phloem	SORBI-3001G189000
Zm00001d013099	7.38863e-19	0.367463	0.271	0.135	4.16579e-14	Phloem	SORBI-3001G063000
Zm00001d013310	9.20243e-19	0.158927	0.305	0.153	5.18842e-14	Phloem	SORBI-3001G096300
SORBI-3003G214900	1.16045e-18	0.245175	0.337	0.183	6.54275e-14	Phloem	SORBI-3003G214900
Zm00001d021662	1.20483e-18	0.283105	0.328	0.181	6.79294e-14	Phloem	SORBI-3002G323300
SORBI-3005G112800	1.31411e-18	-0.289152	0.936	0.925	7.40906e-14	Phloem	SORBI-3005G112800
SORBI-3004G286700	1.41454e-18	0.24462	0.307	0.152	7.97534e-14	Phloem	SORBI-3004G286700
Zm00001d028815	1.63851e-18	0.879726	0.369	0.225	9.2381e-14	Phloem	SORBI-3001G400700
Zm00001d033747	1.87037e-18	0.399043	0.405	0.242	1.05453e-13	Phloem	SORBI-3001G116400
SORBI-3008G189300	1.88865e-18	0.401367	0.417	0.273	1.06484e-13	Phloem	SORBI-3008G189300
SORBI-3002G242500	2.75284e-18	0.155779	0.208	0.091	1.55208e-13	Phloem	SORBI-3002G242500
Zm00001d015905	3.22343e-18	0.326651	0.324	0.171	1.8174e-13	Phloem	SORBI-3004G136600
SORBI-3010G237000	3.41701e-18	0.460503	0.672	0.646	1.92654e-13	Phloem	SORBI-3010G237000
SORBI-3001G523866	3.50639e-18	0.215768	0.261	0.126	1.97694e-13	Phloem	SORBI-3001G523866
SORBI-3002G141300	4.16776e-18	0.137173	0.144	0.052	2.34982e-13	Phloem	SORBI-3002G141300
Zm00001d021965	4.18053e-18	0.100185	0.121	0.038	2.35703e-13	Phloem	SORBI-3002G357000
SORBI-3006G135300	4.7902e-18	0.24465	0.167	0.065	2.70076e-13	Phloem	SORBI-3006G135300
Zm00001d020339	4.94145e-18	-0.781041	0.133	0.299	2.78604e-13	Phloem	SORBI-3002G189100
SORBI-3004G288700	5.43998e-18	-0.831397	0.21	0.378	3.06711e-13	Phloem	SORBI-3004G288700
Zm00001d005766	6.0244e-18	0.404851	0.328	0.179	3.39662e-13	Phloem	SORBI-3002G199500
SORBI-3004G275200	6.2158e-18	0.234945	0.301	0.158	3.50453e-13	Phloem	SORBI-3004G275200
SORBI-3001G225100	6.97701e-18	0.166514	0.127	0.043	3.93371e-13	Phloem	SORBI-3001G225100
Zm00001d042662	7.31579e-18	0.150144	0.265	0.13	4.12471e-13	Phloem	SORBI-3003G373500
Zm00001d027667	7.72801e-18	0.236994	0.227	0.105	4.35713e-13	Phloem	SORBI-3001G504000
SORBI-3004G177700	8.26238e-18	0.228284	0.301	0.158	4.65841e-13	Phloem	SORBI-3004G177700
SORBI-3009G063100	1.11214e-17	0.140577	0.176	0.069	6.27035e-13	Phloem	SORBI-3009G063100
SORBI-3003G298100	1.16588e-17	0.179772	0.239	0.114	6.57337e-13	Phloem	SORBI-3003G298100
SORBI-3006G094800	1.20748e-17	0.293817	0.278	0.139	6.80789e-13	Phloem	SORBI-3006G094800
Zm00001d047461	1.20925e-17	0.139367	0.201	0.087	6.81787e-13	Phloem	SORBI-3001G367800
Zm00001d027925	1.31806e-17	-0.401801	0.178	0.363	7.43138e-13	Phloem	SORBI-3001G481400
Zm00001d022258	1.37328e-17	0.199587	0.288	0.144	7.7427e-13	Phloem	SORBI-3002G388600
SORBI-3002G072600	1.43646e-17	0.174279	0.25	0.122	8.09893e-13	Phloem	SORBI-3002G072600
SORBI-3004G011700	1.49519e-17	-0.3621	0.409	0.628	8.43001e-13	Phloem	SORBI-3004G011700
Zm00001d025118	1.82954e-17	0.364964	0.375	0.235	1.03151e-12	Phloem	SORBI-3006G038400
SORBI-3001G420100	1.87691e-17	0.565124	0.35	0.208	1.05822e-12	Phloem	SORBI-3001G420100
SORBI-3005G139700	1.96504e-17	0.403102	0.328	0.185	1.10791e-12	Phloem	SORBI-3005G139700
Zm00001d020511	2.0237e-17	0.205664	0.284	0.147	1.14098e-12	Phloem	SORBI-3002G204200
Zm00001d035457	2.08998e-17	0.172674	0.239	0.116	1.17835e-12	Phloem	SORBI-3009G028300
SORBI-3006G154400	2.11242e-17	0.463059	0.388	0.232	1.191e-12	Phloem	SORBI-3006G154400
SORBI-3004G220300	2.21535e-17	-0.564691	0.371	0.531	1.24904e-12	Phloem	SORBI-3004G220300
Zm00001d035652	2.24672e-17	0.113387	0.153	0.058	1.26672e-12	Phloem	SORBI-3009G014200
Zm00001d038598	2.3861e-17	-0.476923	0.093	0.274	1.34531e-12	Phloem	SORBI-3009G186500
Zm00001d044734	2.52637e-17	0.350086	0.337	0.195	1.42439e-12	Phloem	SORBI-3010G102000
Zm00001d046134	2.74578e-17	0.189784	0.239	0.115	1.5481e-12	Phloem	SORBI-3010G155500
SORBI-3003G152200	3.13253e-17	0.506711	0.426	0.279	1.76615e-12	Phloem	SORBI-3003G152200
SORBI-3007G090436	3.19657e-17	0.563869	0.356	0.207	1.80226e-12	Phloem	SORBI-3007G090436
SORBI-3002G078500	3.35382e-17	0.312879	0.197	0.088	1.89092e-12	Phloem	SORBI-3002G078500
Zm00001d027536	3.38982e-17	0.128386	0.195	0.085	1.91121e-12	Phloem	SORBI-3001G514800
Zm00001d002690	4.64746e-17	-0.613306	0.203	0.381	2.62029e-12	Phloem	SORBI-3006G176700
SORBI-3003G275300	5.38161e-17	-0.603742	0.159	0.332	3.0342e-12	Phloem	SORBI-3003G275300
SORBI-3001G524000	5.53485e-17	0.153365	0.148	0.057	3.12061e-12	Phloem	SORBI-3001G524000
SORBI-3004G151800	5.8576e-17	0.246657	0.339	0.192	3.30258e-12	Phloem	SORBI-3004G151800
Zm00001d038057	6.07538e-17	0.411087	0.614	0.544	3.42536e-12	Phloem	SORBI-3009G119900
SORBI-3002G261900	6.1558e-17	0.377032	0.436	0.295	3.4707e-12	Phloem	SORBI-3002G261900
SORBI-3002G212000	6.4986e-17	0.137419	0.191	0.081	3.66398e-12	Phloem	SORBI-3002G212000
Zm00001d042243	6.91926e-17	0.260251	0.25	0.123	3.90115e-12	Phloem	SORBI-3003G413900
Zm00001d020003	7.23812e-17	0.396525	0.475	0.344	4.08093e-12	Phloem	SORBI-3002G159500
Zm00001d022078	7.69896e-17	0.273469	0.299	0.161	4.34075e-12	Phloem	SORBI-3002G367900
Zm00001d048789	8.14988e-17	-0.360391	0.057	0.222	4.59498e-12	Phloem	SORBI-3005G195100
Zm00001d024421	8.39196e-17	0.226806	0.345	0.198	4.73147e-12	Phloem	SORBI-3007G060700
Zm00001d044416	9.7527e-17	0.220818	0.303	0.161	5.49867e-12	Phloem	SORBI-3003G212300
SORBI-3001G173300	1.00649e-16	-0.287092	0.9	0.899	5.67466e-12	Phloem	SORBI-3001G173300
SORBI-3001G062300	1.06103e-16	0.252435	0.269	0.139	5.98219e-12	Phloem	SORBI-3001G062300
SORBI-3001G012400	1.336e-16	-0.378545	0.314	0.546	7.53251e-12	Phloem	SORBI-3001G012400
SORBI-3009G216050	1.85668e-16	0.138872	0.169	0.071	1.04681e-11	Phloem	SORBI-3009G216050
Zm00001d015376	2.0963e-16	0.289379	0.769	0.739	1.18191e-11	Phloem	SORBI-3004G055200
SORBI-3006G135600	2.16435e-16	0.218605	0.35	0.204	1.22028e-11	Phloem	SORBI-3006G135600
SORBI-3003G122900	2.22385e-16	0.177509	0.195	0.088	1.25383e-11	Phloem	SORBI-3003G122900
SORBI-3010G052800	2.86936e-16	0.182186	0.292	0.154	1.61777e-11	Phloem	SORBI-3010G052800
SORBI-3003G364600	3.17738e-16	0.595132	0.364	0.236	1.79144e-11	Phloem	SORBI-3003G364600
SORBI-3001G418100	3.42234e-16	-0.321023	0.818	0.858	1.92955e-11	Phloem	SORBI-3001G418100
Zm00001d033925	3.62116e-16	0.495315	0.54	0.457	2.04165e-11	Phloem	SORBI-3001G098500
SORBI-3001G512800	3.73422e-16	0.703011	0.523	0.464	2.10539e-11	Phloem	SORBI-3001G512800
Zm00001d003658	3.81277e-16	0.17508	0.197	0.087	2.14968e-11	Phloem	SORBI-3006G083100
Zm00001d049594	3.82945e-16	0.281107	0.324	0.181	2.15908e-11	Phloem	SORBI-3007G036900
Zm00001d017708	3.88441e-16	0.179136	0.246	0.123	2.19007e-11	Phloem	SORBI-3004G272300
SORBI-3003G313800	4.04979e-16	0.17744	0.155	0.062	2.28331e-11	Phloem	SORBI-3003G313800
Zm00001d048131	4.73291e-16	0.177872	0.225	0.107	2.66846e-11	Phloem	SORBI-3001G462800
Zm00001d051056	4.80118e-16	0.616919	0.394	0.28	2.70696e-11	Phloem	SORBI-3004G211900
Zm00001d017445	4.82208e-16	0.269774	0.383	0.235	2.71874e-11	Phloem	SORBI-3004G298300
SORBI-3003G098300	4.86897e-16	0.121794	0.163	0.068	2.74517e-11	Phloem	SORBI-3003G098300
Zm00001d008223	5.10212e-16	-0.37123	0.011	0.14	2.87663e-11	Phloem	SORBI-3003G134100
Zm00001d013317	6.09569e-16	0.280093	0.373	0.232	3.43681e-11	Phloem	SORBI-3001G098200
SORBI-3009G063900	6.13117e-16	0.330272	0.449	0.309	3.45682e-11	Phloem	SORBI-3009G063900
Zm00001d029597	6.28105e-16	0.459892	0.462	0.345	3.54132e-11	Phloem	SORBI-3001G329100
Zm00001d035616	6.30103e-16	0.290589	0.494	0.347	3.55258e-11	Phloem	SORBI-3009G016000
SORBI-3006G199800	1.15826e-15	0.16886	0.197	0.091	6.5304e-11	Phloem	SORBI-3006G199800
SORBI-3003G216232	1.20923e-15	0.543062	0.367	0.241	6.81775e-11	Phloem	SORBI-3003G216232
SORBI-3003G072300	1.52238e-15	0.260056	0.799	0.78	8.58336e-11	Phloem	SORBI-3003G072300
SORBI-3006G154600	1.68433e-15	0.178738	0.193	0.088	9.49643e-11	Phloem	SORBI-3006G154600
SORBI-3003G380000	1.74043e-15	0.136353	0.199	0.091	9.8127e-11	Phloem	SORBI-3003G380000
SORBI-3001G197400	1.92829e-15	0.796412	0.502	0.418	1.08719e-10	Phloem	SORBI-3001G197400
Zm00001d040422	2.14e-15	-0.323601	0.121	0.3	1.20655e-10	Phloem	SORBI-3003G125701
Zm00001d048795	2.21983e-15	0.133767	0.193	0.088	1.25156e-10	Phloem	SORBI-3005G194800
SORBI-3001G196900	2.55329e-15	0.564384	0.39	0.257	1.43957e-10	Phloem	SORBI-3001G196900
Zm00001d032322	2.82479e-15	0.1705	0.367	0.211	1.59264e-10	Phloem	SORBI-3007G129000
Zm00001d020968	2.88901e-15	0.507499	0.311	0.181	1.62885e-10	Phloem	SORBI-3002G251000
Zm00001d053394	3.21287e-15	-0.700104	0.182	0.343	1.81145e-10	Phloem	SORBI-3004G114400
Zm00001d015914	3.50898e-15	0.278058	0.191	0.089	1.9784e-10	Phloem	SORBI-3004G133500
Zm00001d019725.1	3.53477e-15	0.195247	0.227	0.113	1.99294e-10	Phloem	Zm00001d019725.1
Zm00001d042541	3.61166e-15	-0.848307	0.057	0.196	2.03629e-10	Phloem	SORBI-3003G385500
Zm00001d016401	3.90686e-15	0.59059	0.343	0.204	2.20273e-10	Phloem	SORBI-3004G088551
SORBI-3004G228700	4.06384e-15	0.309477	0.331	0.187	2.29124e-10	Phloem	SORBI-3004G228700
SORBI-3003G320300	4.57839e-15	0.111561	0.117	0.041	2.58134e-10	Phloem	SORBI-3003G320300
Zm00001d018399	4.62683e-15	0.21931	0.356	0.209	2.60865e-10	Phloem	SORBI-3004G333100
Zm00001d022509	4.81131e-15	0.715702	0.369	0.246	2.71266e-10	Phloem	SORBI-3002G407100
SORBI-3009G136400	6.19189e-15	0.43582	0.282	0.155	3.49105e-10	Phloem	SORBI-3009G136400
SORBI-3009G151600	6.66001e-15	0.450655	0.358	0.224	3.75498e-10	Phloem	SORBI-3009G151600
SORBI-3006G274800	7.52429e-15	0.271636	0.424	0.287	4.24227e-10	Phloem	SORBI-3006G274800
Zm00001d051754	7.68654e-15	0.127274	0.155	0.064	4.33375e-10	Phloem	SORBI-3004G250900
Zm00001d023535	7.87924e-15	0.63985	0.371	0.255	4.4424e-10	Phloem	SORBI-3008G050600
SORBI-3001G503100	8.02107e-15	-0.561884	0.064	0.207	4.52236e-10	Phloem	SORBI-3001G503100
Zm00001d029937	8.86777e-15	0.151711	0.153	0.063	4.99974e-10	Phloem	SORBI-3001G297000
SORBI-3003G136200	9.31808e-15	-0.673148	0.229	0.389	5.25362e-10	Phloem	SORBI-3003G136200
Zm00001d037909	1.23705e-14	0.117895	0.102	0.034	6.97462e-10	Phloem	SORBI-3009G115500
SORBI-3003G253000	1.28801e-14	0.335604	0.644	0.606	7.26196e-10	Phloem	SORBI-3003G253000
Zm00001d010885	1.30162e-14	0.22782	0.22	0.11	7.33866e-10	Phloem	SORBI-3009G041100
SORBI-3001G082400	1.31738e-14	-0.508562	0.225	0.404	7.42753e-10	Phloem	SORBI-3001G082400
SORBI-3006G000300	1.335e-14	-0.363444	0.305	0.497	7.52688e-10	Phloem	SORBI-3006G000300
SORBI-3001G024500	1.3692e-14	-0.549006	0.085	0.226	7.71966e-10	Phloem	SORBI-3001G024500
SORBI-3008G029400	1.50636e-14	0.214215	0.212	0.104	8.49302e-10	Phloem	SORBI-3008G029400
SORBI-3001G206700	1.52115e-14	0.413072	0.538	0.466	8.57641e-10	Phloem	SORBI-3001G206700
Zm00001d032950	1.53057e-14	-0.501371	0.381	0.525	8.62948e-10	Phloem	SORBI-3001G247600
SORBI-3001G329800	1.65865e-14	0.495399	0.597	0.543	9.35164e-10	Phloem	SORBI-3001G329800
SORBI-3006G267900	1.73915e-14	0.11276	0.252	0.126	9.80552e-10	Phloem	SORBI-3006G267900
Zm00001d021187	1.77431e-14	0.370313	0.4	0.272	1.00037e-09	Phloem	SORBI-3002G264400
SORBI-3008G185900	1.95322e-14	-0.186846	0.998	0.998	1.10124e-09	Phloem	SORBI-3008G185900
SORBI-3004G014000	2.17544e-14	0.249041	0.288	0.16	1.22654e-09	Phloem	SORBI-3004G014000
Zm00001d043382	2.38909e-14	0.370647	0.597	0.519	1.34699e-09	Phloem	SORBI-3003G303300
Zm00001d008268	2.45414e-14	0.319849	0.407	0.27	1.38367e-09	Phloem	SORBI-3003G126800
SORBI-3001G410200	2.47771e-14	0.303643	0.837	0.836	1.39696e-09	Phloem	SORBI-3001G410200
Zm00001d028815.2	2.77387e-14	0.719587	0.337	0.205	1.56394e-09	Phloem	Zm00001d028815.2
Zm00001d007153	3.33151e-14	0.369506	0.644	0.623	1.87834e-09	Phloem	SORBI-3002G414600
Zm00001d029371	3.57609e-14	0.465363	0.35	0.22	2.01624e-09	Phloem	SORBI-3001G353300
SORBI-3004G286600	3.86388e-14	0.950406	0.636	0.601	2.17849e-09	Phloem	SORBI-3004G286600
Zm00001d053665	4.14489e-14	0.188993	0.246	0.129	2.33693e-09	Phloem	SORBI-3004G079700
Zm00001d022161	4.85681e-14	0.119377	0.176	0.08	2.73832e-09	Phloem	SORBI-3002G376600
Zm00001d015138	5.10521e-14	-1.09605	0.087	0.236	2.87837e-09	Phloem	SORBI-3004G030200
SORBI-3002G379200	5.27204e-14	-0.30711	0.097	0.256	2.97243e-09	Phloem	SORBI-3002G379200
Zm00001d048656.4	5.55919e-14	-0.746071	0.042	0.171	3.13433e-09	Phloem	Zm00001d048656.4
SORBI-3005G003500	6.01421e-14	0.265896	0.411	0.272	3.39087e-09	Phloem	SORBI-3005G003500
Zm00001d020400	6.53093e-14	-0.372237	0.017	0.136	3.6822e-09	Phloem	SORBI-3002G195400
SORBI-3009G066800	7.50617e-14	0.354538	0.307	0.182	4.23205e-09	Phloem	SORBI-3009G066800
SORBI-3006G062500	7.61212e-14	-0.275016	0.544	0.709	4.29179e-09	Phloem	SORBI-3006G062500
SORBI-3001G087400	7.84883e-14	0.155604	0.258	0.138	4.42525e-09	Phloem	SORBI-3001G087400
Zm00001d018134	8.44391e-14	0.370445	0.612	0.525	4.76076e-09	Phloem	SORBI-3004G306200
SORBI-3005G051200	9.33049e-14	0.150749	0.201	0.098	5.26062e-09	Phloem	SORBI-3005G051200
Zm00001d008820	9.4056e-14	0.168931	0.214	0.108	5.30297e-09	Phloem	SORBI-3003G036300
Zm00001d027893	9.43859e-14	0.215403	0.189	0.09	5.32157e-09	Phloem	SORBI-3001G483400
Zm00001d025323	9.51939e-14	0.195462	0.305	0.173	5.36713e-09	Phloem	SORBI-3006G064100
SORBI-3007G087000	9.73986e-14	0.210258	0.341	0.209	5.49143e-09	Phloem	SORBI-3007G087000
SORBI-3003G367300	9.91289e-14	0.312141	0.278	0.161	5.58898e-09	Phloem	SORBI-3003G367300
Zm00001d039416	1.03231e-13	0.116211	0.148	0.064	5.82029e-09	Phloem	SORBI-3003G028900
Zm00001d042738	1.09229e-13	0.244084	0.244	0.129	6.15842e-09	Phloem	SORBI-3003G367000
Zm00001d014166	1.20127e-13	0.429847	0.352	0.225	6.77289e-09	Phloem	SORBI-3001G247300
SORBI-3008G009400	1.20516e-13	-0.120385	0.278	0.14	6.79479e-09	Phloem	SORBI-3008G009400
SORBI-3001G012300	1.27086e-13	-0.349405	0.46	0.635	7.16523e-09	Phloem	SORBI-3001G012300
Zm00001d048616	1.36896e-13	0.2736	0.337	0.207	7.71833e-09	Phloem	SORBI-3005G228000
Zm00001d028731	1.4693e-13	0.202622	0.263	0.147	8.28404e-09	Phloem	SORBI-3001G408400
Zm00001d001807	1.64088e-13	0.138182	0.182	0.085	9.25144e-09	Phloem	SORBI-3006G270000
Zm00001d035171	1.64894e-13	0.221837	0.193	0.093	9.29688e-09	Phloem	SORBI-3007G026400
SORBI-3003G052700	1.83658e-13	0.345938	0.367	0.236	1.03548e-08	Phloem	SORBI-3003G052700
SORBI-3006G224200	1.86417e-13	-0.329922	0.025	0.143	1.05104e-08	Phloem	SORBI-3006G224200
SORBI-3009G069600	1.89157e-13	0.60086	0.379	0.261	1.06648e-08	Phloem	SORBI-3009G069600
Zm00001d013797	1.9617e-13	0.136958	0.146	0.063	1.10602e-08	Phloem	SORBI-3001G179900
SORBI-3004G247600	2.00267e-13	-0.327298	0.085	0.233	1.12913e-08	Phloem	SORBI-3004G247600
SORBI-3006G075000	2.32191e-13	-0.198187	0.053	0.187	1.30911e-08	Phloem	SORBI-3006G075000
Zm00001d024885	2.38215e-13	-0.371382	0.081	0.224	1.34308e-08	Phloem	SORBI-3006G009100
SORBI-3003G140700	2.39825e-13	-0.737548	0.29	0.419	1.35216e-08	Phloem	SORBI-3003G140700
Zm00001d020438	2.70759e-13	0.267356	0.481	0.35	1.52657e-08	Phloem	SORBI-3002G199100
SORBI-3010G125400	3.07147e-13	0.162819	0.155	0.067	1.73172e-08	Phloem	SORBI-3010G125400
Zm00001d037872	3.13398e-13	0.144236	0.174	0.082	1.76697e-08	Phloem	SORBI-3009G118300
SORBI-3003G357100	3.17806e-13	0.366609	0.388	0.259	1.79182e-08	Phloem	SORBI-3003G357100
Zm00001d024886	3.28998e-13	-0.543461	0.078	0.22	1.85492e-08	Phloem	SORBI-3006G009000
Zm00001d023437	3.35184e-13	-0.203908	0.07	0.212	1.8898e-08	Phloem	SORBI-3008G039900
Zm00001d010885.2	3.46336e-13	0.386915	0.316	0.193	1.95268e-08	Phloem	Zm00001d010885.2
SORBI-3003G042900	3.67347e-13	-0.439124	0.038	0.161	2.07114e-08	Phloem	SORBI-3003G042900
Zm00001d029151	3.74862e-13	0.197078	0.258	0.142	2.11351e-08	Phloem	SORBI-3001G372500
Zm00001d014467	4.0181e-13	-0.386532	0.004	0.109	2.26544e-08	Phloem	SORBI-3010G232500
Zm00001d038451	4.16806e-13	0.108717	0.106	0.039	2.34999e-08	Phloem	SORBI-3009G171600
Zm00001d021668	4.19693e-13	0.741619	0.443	0.364	2.36627e-08	Phloem	SORBI-3002G324200
SORBI-3006G188200	4.49576e-13	-0.245978	0.032	0.151	2.53475e-08	Phloem	SORBI-3006G188200
Zm00001d017976	4.73122e-13	0.168649	0.229	0.121	2.66751e-08	Phloem	SORBI-3004G245100
SORBI-3004G259200	5.47856e-13	0.222272	0.951	0.946	3.08886e-08	Phloem	SORBI-3004G259200
SORBI-3003G241000	6.07039e-13	0.610964	0.419	0.334	3.42255e-08	Phloem	SORBI-3003G241000
SORBI-3001G348900	6.11813e-13	-0.26231	0.019	0.133	3.44946e-08	Phloem	SORBI-3001G348900
SORBI-3009G203100	6.16419e-13	0.311305	0.534	0.415	3.47543e-08	Phloem	SORBI-3009G203100
SORBI-3002G136700	6.37126e-13	0.194801	0.36	0.222	3.59218e-08	Phloem	SORBI-3002G136700
Zm00001d030131	6.39622e-13	0.48024	0.496	0.414	3.60625e-08	Phloem	SORBI-3001G282900
Zm00001d036738	6.97776e-13	0.113349	0.193	0.096	3.93413e-08	Phloem	SORBI-3010G207100
SORBI-3001G116700	7.12082e-13	0.185947	0.303	0.18	4.01479e-08	Phloem	SORBI-3001G116700
Zm00001d001913	7.1639e-13	0.429212	0.706	0.681	4.03908e-08	Phloem	SORBI-3006G257900
Zm00001d007271	7.21089e-13	0.194393	0.131	0.055	4.06557e-08	Phloem	SORBI-3005G086400
SORBI-3009G032600	7.3738e-13	0.218837	0.32	0.187	4.15742e-08	Phloem	SORBI-3009G032600
SORBI-3010G050900	7.37596e-13	0.128811	0.195	0.097	4.15864e-08	Phloem	SORBI-3010G050900
Zm00001d042809	7.41355e-13	0.155247	0.337	0.198	4.17983e-08	Phloem	SORBI-3003G361300
Zm00001d022517	7.44629e-13	-0.227684	0.025	0.141	4.19829e-08	Phloem	SORBI-3002G421400
Zm00001d034307	8.01642e-13	0.132855	0.165	0.076	4.51974e-08	Phloem	SORBI-3001G069200
SORBI-3002G222200	9.03288e-13	-0.258964	0.174	0.334	5.09283e-08	Phloem	SORBI-3002G222200
Zm00001d043569	9.22486e-13	-0.281715	0.047	0.171	5.20107e-08	Phloem	SORBI-3003G285500
SORBI-3001G259600	9.56318e-13	0.549294	0.343	0.227	5.39182e-08	Phloem	SORBI-3001G259600
SORBI-3001G134400	1.02662e-12	0.323852	0.737	0.757	5.7882e-08	Phloem	SORBI-3001G134400
Zm00001d036213	1.04727e-12	0.269379	0.814	0.837	5.90462e-08	Phloem	SORBI-3010G041600
Zm00001d015612	1.12772e-12	0.139376	0.275	0.158	6.35822e-08	Phloem	SORBI-3004G070700
SORBI-3006G163100	1.23616e-12	0.11575	0.133	0.057	6.96959e-08	Phloem	SORBI-3006G163100
Zm00001d048627	1.29471e-12	-0.303933	0.487	0.611	7.29968e-08	Phloem	SORBI-3005G222200
SORBI-3009G084500	1.3446e-12	0.179137	0.25	0.139	7.58099e-08	Phloem	SORBI-3009G084500
SORBI-3001G471200	1.39417e-12	0.418759	0.354	0.227	7.86048e-08	Phloem	SORBI-3001G471200
SORBI-3002G203900	1.39887e-12	0.212189	0.252	0.137	7.88695e-08	Phloem	SORBI-3002G203900
Zm00001d029263	1.47696e-12	0.203425	0.564	0.381	8.32726e-08	Phloem	SORBI-3001G361600
SORBI-3003G151900	1.59379e-12	0.188422	0.254	0.137	8.98596e-08	Phloem	SORBI-3003G151900
SORBI-3003G290500	1.60349e-12	0.155308	0.453	0.303	9.04062e-08	Phloem	SORBI-3003G290500
Zm00001d027988	1.71716e-12	0.588049	0.684	0.651	9.68152e-08	Phloem	SORBI-3001G476400
SORBI-3003G288600	1.77236e-12	0.574766	0.525	0.468	9.99276e-08	Phloem	SORBI-3003G288600
SORBI-3004G222000	1.85715e-12	-0.647489	0.044	0.164	1.04708e-07	Phloem	SORBI-3004G222000
SORBI-3004G221500	1.91954e-12	0.700015	0.35	0.235	1.08226e-07	Phloem	SORBI-3004G221500
Zm00001d030091	1.95555e-12	0.17189	0.212	0.109	1.10256e-07	Phloem	SORBI-3001G285300
Zm00001d042315	1.96038e-12	0.218884	0.322	0.194	1.10528e-07	Phloem	SORBI-3003G406800
SORBI-3009G238500	1.96784e-12	0.171451	0.218	0.112	1.10949e-07	Phloem	SORBI-3009G238500
SORBI-3003G209000	2.12298e-12	0.26146	0.727	0.718	1.19696e-07	Phloem	SORBI-3003G209000
SORBI-3001G149500	2.2368e-12	0.46807	0.905	0.889	1.26113e-07	Phloem	SORBI-3001G149500
SORBI-3001G426000	2.36584e-12	0.353483	0.261	0.15	1.33389e-07	Phloem	SORBI-3001G426000
Zm00001d037097	2.70922e-12	-0.175514	0.013	0.118	1.52748e-07	Phloem	SORBI-3010G071400
SORBI-3002G180300	3.47308e-12	0.229815	0.75	0.743	1.95816e-07	Phloem	SORBI-3002G180300
SORBI-3005G145201	3.60056e-12	0.268833	0.752	0.776	2.03003e-07	Phloem	SORBI-3005G145201
Zm00001d046867	3.76346e-12	-0.365692	0.034	0.147	2.12187e-07	Phloem	SORBI-3010G212800
Zm00001d023411	3.79287e-12	-0.165122	0.004	0.101	2.13846e-07	Phloem	SORBI-3008G036900
SORBI-3004G293700	4.14598e-12	0.228206	0.339	0.216	2.33755e-07	Phloem	SORBI-3004G293700
Zm00001d018627	4.24594e-12	-0.574777	0.106	0.233	2.3939e-07	Phloem	SORBI-3002G004900
Zm00001d029392	4.24609e-12	0.202567	0.314	0.194	2.39399e-07	Phloem	SORBI-3001G350900
Zm00001d045965	4.4891e-12	0.115001	0.265	0.148	2.531e-07	Phloem	SORBI-3010G141600
Zm00001d028917	4.66324e-12	0.417987	0.36	0.24	2.62918e-07	Phloem	SORBI-3001G393000
SORBI-3003G228900	4.72063e-12	0.390521	0.379	0.255	2.66154e-07	Phloem	SORBI-3003G228900
SORBI-3003G248400	4.78257e-12	0.462302	0.36	0.257	2.69646e-07	Phloem	SORBI-3003G248400
Zm00001d032461	5.01132e-12	-0.486903	0.225	0.396	2.82543e-07	Phloem	SORBI-3001G195800
Zm00001d048647	5.05482e-12	0.192703	0.206	0.108	2.84996e-07	Phloem	SORBI-3005G217200
Zm00001d040028	5.69684e-12	-1.26727	0.11	0.23	3.21194e-07	Phloem	SORBI-3003G088400
SORBI-3010G079000	5.967e-12	0.264653	0.377	0.244	3.36426e-07	Phloem	SORBI-3010G079000
Zm00001d017502	6.01059e-12	-0.192123	0.04	0.158	3.38883e-07	Phloem	SORBI-3004G293500
Zm00001d037485	6.98195e-12	0.429795	0.536	0.484	3.93649e-07	Phloem	SORBI-3010G059300
SORBI-3003G190800	7.1872e-12	0.178602	0.32	0.2	4.05222e-07	Phloem	SORBI-3003G190800
SORBI-3003G218900	7.25907e-12	0.225098	0.322	0.2	4.09273e-07	Phloem	SORBI-3003G218900
SORBI-3003G401200	7.2734e-12	-0.210556	0.07	0.203	4.10082e-07	Phloem	SORBI-3003G401200
SORBI-3003G361100	7.29442e-12	0.212348	0.248	0.143	4.11267e-07	Phloem	SORBI-3003G361100
SORBI-3003G082300	7.5264e-12	-0.296309	0.061	0.189	4.24346e-07	Phloem	SORBI-3003G082300
SORBI-3010G084700	7.92497e-12	0.75663	0.371	0.275	4.46818e-07	Phloem	SORBI-3010G084700
SORBI-3003G071700	8.94872e-12	0.111037	0.203	0.107	5.04538e-07	Phloem	SORBI-3003G071700
SORBI-3002G090500	9.20839e-12	-0.219246	0.669	0.775	5.19178e-07	Phloem	SORBI-3002G090500
Zm00001d034995	9.2257e-12	0.281945	0.347	0.219	5.20154e-07	Phloem	SORBI-3007G005600
Zm00001d049049	9.24363e-12	0.188326	0.331	0.206	5.21165e-07	Phloem	SORBI-3005G101400
Zm00001d020260.1	1.01121e-11	0.42844	0.441	0.328	5.70132e-07	Phloem	Zm00001d020260.1
Zm00001d002090	1.03072e-11	0.10837	0.178	0.087	5.81129e-07	Phloem	SORBI-3006G238700
SORBI-3003G341100	1.03423e-11	0.172937	0.136	0.06	5.83107e-07	Phloem	SORBI-3003G341100
SORBI-3006G220200	1.09742e-11	0.485728	0.409	0.303	6.18738e-07	Phloem	SORBI-3006G220200
Zm00001d015626	1.1025e-11	0.23305	0.191	0.097	6.21603e-07	Phloem	SORBI-3004G071650
SORBI-3006G225500	1.11215e-11	-0.408148	0.032	0.143	6.27042e-07	Phloem	SORBI-3006G225500
Zm00001d033551	1.17109e-11	-0.249875	0.093	0.23	6.60272e-07	Phloem	SORBI-3001G132600
Zm00001d039032	1.17783e-11	0.138577	0.212	0.114	6.6407e-07	Phloem	SORBI-3009G234100
Zm00001d033980	1.23932e-11	0.148429	0.186	0.095	6.98739e-07	Phloem	SORBI-3001G094400
SORBI-3010G267400	1.26479e-11	-0.24175	0.443	0.605	7.13101e-07	Phloem	SORBI-3010G267400
SORBI-3006G064200	1.37792e-11	0.245826	0.237	0.13	7.76883e-07	Phloem	SORBI-3006G064200
Zm00001d051504	1.37801e-11	0.127356	0.258	0.147	7.76937e-07	Phloem	SORBI-3004G277000
Zm00001d036671	1.49399e-11	0.122107	0.201	0.105	8.42325e-07	Phloem	SORBI-3010G217800
SORBI-3010G209200	1.55873e-11	0.168635	0.182	0.093	8.78828e-07	Phloem	SORBI-3010G209200
SORBI-3003G008300	1.56794e-11	0.122459	0.144	0.066	8.84019e-07	Phloem	SORBI-3003G008300
Zm00001d028981	1.57994e-11	0.17339	0.367	0.24	8.90786e-07	Phloem	SORBI-3001G387200
Zm00001d034726	1.59489e-11	0.434764	0.443	0.357	8.99216e-07	Phloem	SORBI-3001G026900
Zm00001d031809	1.65957e-11	0.124253	0.22	0.119	9.3568e-07	Phloem	SORBI-3007G158300
SORBI-3007G106400	1.77902e-11	0.276586	0.6	0.541	1.00303e-06	Phloem	SORBI-3007G106400
SORBI-3001G350600	1.82819e-11	0.34449	0.612	0.595	1.03075e-06	Phloem	SORBI-3001G350600
Zm00001d038151	1.8653e-11	0.34868	0.309	0.197	1.05168e-06	Phloem	SORBI-3009G131400
SORBI-3001G473400	1.87067e-11	0.304188	0.6	0.553	1.0547e-06	Phloem	SORBI-3001G473400
Zm00001d031614	1.87722e-11	0.122242	0.237	0.13	1.0584e-06	Phloem	SORBI-3007G194400
SORBI-3001G219300	1.9866e-11	0.218579	0.801	0.801	1.12006e-06	Phloem	SORBI-3001G219300
Zm00001d008923	2.21443e-11	0.626608	0.36	0.252	1.24852e-06	Phloem	SORBI-3003G019200
Zm00001d039245	2.36537e-11	0.223224	0.324	0.206	1.33362e-06	Phloem	SORBI-3003G000600
Zm00001d021266	2.46804e-11	0.463612	0.354	0.238	1.39151e-06	Phloem	SORBI-3002G271000
SORBI-3006G261600	2.49204e-11	-0.296459	0.184	0.346	1.40503e-06	Phloem	SORBI-3006G261600
Zm00001d021413	2.84634e-11	-0.206248	0.021	0.122	1.60479e-06	Phloem	SORBI-3002G292100
SORBI-3002G389000	2.85612e-11	0.460187	0.369	0.262	1.61031e-06	Phloem	SORBI-3002G389000
Zm00001d041917	3.08203e-11	0.350565	0.508	0.435	1.73768e-06	Phloem	SORBI-3008G046900
SORBI-3006G172550	3.11392e-11	-1.27772	0.655	0.731	1.75566e-06	Phloem	SORBI-3006G172550
Zm00001d014753	3.17512e-11	0.162512	0.271	0.16	1.79017e-06	Phloem	SORBI-3010G260300
Zm00001d052978	3.21424e-11	0.332791	0.472	0.375	1.81222e-06	Phloem	SORBI-3005G168100
SORBI-3004G058000	3.42195e-11	0.632545	0.369	0.292	1.92933e-06	Phloem	SORBI-3004G058000
SORBI-3003G277000	3.49681e-11	0.221684	0.328	0.211	1.97154e-06	Phloem	SORBI-3003G277000
Zm00001d014491	3.61355e-11	0.766204	0.445	0.38	2.03736e-06	Phloem	SORBI-3010G234000
SORBI-3002G176200	3.64524e-11	-0.229533	0.11	0.253	2.05523e-06	Phloem	SORBI-3002G176200
Zm00001d008858	3.73541e-11	0.124408	0.174	0.085	2.10606e-06	Phloem	SORBI-3003G030300
SORBI-3002G389100	3.74353e-11	-0.23749	0.021	0.12	2.11064e-06	Phloem	SORBI-3002G389100
SORBI-3004G208400	3.77917e-11	-0.467457	0.233	0.366	2.13074e-06	Phloem	SORBI-3004G208400
SORBI-3001G058300	3.85669e-11	0.134638	0.155	0.075	2.17444e-06	Phloem	SORBI-3001G058300
Zm00001d011066	3.91378e-11	0.248224	0.354	0.23	2.20663e-06	Phloem	SORBI-3009G011700
SORBI-3010G066601	4.00482e-11	0.376725	0.227	0.128	2.25796e-06	Phloem	SORBI-3010G066601
SORBI-3009G247300	4.05636e-11	0.295119	0.301	0.19	2.28702e-06	Phloem	SORBI-3009G247300
SORBI-3002G361100	4.16533e-11	-0.973691	0.108	0.225	2.34846e-06	Phloem	SORBI-3002G361100
Zm00001d003101	4.21025e-11	0.147077	0.246	0.141	2.37378e-06	Phloem	SORBI-3006G140000
SORBI-3003G117700	4.26264e-11	0.112512	0.18	0.093	2.40332e-06	Phloem	SORBI-3003G117700
Zm00001d025023.1	4.30726e-11	-0.201142	0.059	0.174	2.42848e-06	Phloem	Zm00001d025023.1
Zm00001d027861	4.61022e-11	-0.292711	0.256	0.391	2.59929e-06	Phloem	SORBI-3001G488200
Zm00001d017454	4.90917e-11	-0.432705	0.252	0.41	2.76784e-06	Phloem	SORBI-3004G297950
SORBI-3003G317100	5.04281e-11	0.159951	0.265	0.156	2.84318e-06	Phloem	SORBI-3003G317100
SORBI-3001G353200	5.44058e-11	0.240529	0.335	0.219	3.06745e-06	Phloem	SORBI-3001G353200
Zm00001d032422	5.78526e-11	-0.402788	0.066	0.178	3.26178e-06	Phloem	SORBI-3001G191200
Zm00001d041609	6.04803e-11	0.169669	0.258	0.152	3.40994e-06	Phloem	SORBI-3008G128900
SORBI-3002G361500	6.23917e-11	-0.486951	0.059	0.169	3.5177e-06	Phloem	SORBI-3002G361500
Zm00001d032410	6.31304e-11	0.205307	0.102	0.04	3.55935e-06	Phloem	SORBI-3001G190300
SORBI-3006G024000	6.40966e-11	-0.33051	0.042	0.147	3.61383e-06	Phloem	SORBI-3006G024000
Zm00001d039112	7.52303e-11	0.270103	0.341	0.216	4.24156e-06	Phloem	SORBI-3009G243200
SORBI-3007G045700	7.75085e-11	-0.188355	0.907	0.898	4.37001e-06	Phloem	SORBI-3007G045700
Zm00001d016659	7.94684e-11	-0.286954	0.193	0.329	4.48051e-06	Phloem	SORBI-3004G161900
Zm00001d028815.6	8.40057e-11	0.93195	0.36	0.265	4.73632e-06	Phloem	Zm00001d028815.6
Zm00001d029848	9.13195e-11	-0.109754	0.064	0.186	5.14869e-06	Phloem	SORBI-3001G305600
SORBI-3001G129000	9.39018e-11	0.305246	0.341	0.234	5.29428e-06	Phloem	SORBI-3001G129000
Zm00001d021878	9.60963e-11	0.140905	0.252	0.15	5.41801e-06	Phloem	SORBI-3002G348600
SORBI-3001G124600	9.92465e-11	0.175791	0.258	0.157	5.59562e-06	Phloem	SORBI-3001G124600
SORBI-3001G465800	1.00767e-10	0.265058	0.653	0.639	5.68136e-06	Phloem	SORBI-3001G465800
SORBI-3005G170100	1.01098e-10	-0.318642	0.106	0.238	5.70001e-06	Phloem	SORBI-3005G170100
Zm00001d004159	1.01384e-10	0.118519	0.186	0.097	5.71614e-06	Phloem	SORBI-3006G033200
SORBI-3001G237300	1.03418e-10	-0.169825	0.114	0.255	5.83079e-06	Phloem	SORBI-3001G237300
SORBI-3010G154700	1.04961e-10	0.311824	0.504	0.417	5.91782e-06	Phloem	SORBI-3010G154700
Zm00001d013455	1.07316e-10	0.110166	0.114	0.049	6.05058e-06	Phloem	SORBI-3001G120000
Zm00001d018507	1.1174e-10	0.163811	0.352	0.23	6.29999e-06	Phloem	SORBI-3004G349100
SORBI-3001G471900	1.12661e-10	0.219433	0.284	0.178	6.35196e-06	Phloem	SORBI-3001G471900
Zm00001d010855	1.12959e-10	0.779132	0.447	0.377	6.36873e-06	Phloem	SORBI-3009G046600
SORBI-3001G478300	1.15636e-10	0.149164	0.335	0.219	6.5197e-06	Phloem	SORBI-3001G478300
SORBI-3001G489600	1.18856e-10	0.267107	0.434	0.308	6.70123e-06	Phloem	SORBI-3001G489600
Zm00001d036951	1.24866e-10	-0.393118	0.305	0.435	7.04007e-06	Phloem	SORBI-3010G175800
Zm00001d015618	1.28209e-10	-0.251291	0.1	0.22	7.22857e-06	Phloem	SORBI-3004G071000
SORBI-3005G104400	1.31806e-10	0.114704	0.178	0.09	7.43136e-06	Phloem	SORBI-3005G104400
SORBI-3003G243600	1.32438e-10	0.317514	0.544	0.468	7.46698e-06	Phloem	SORBI-3003G243600
Zm00001d049441	1.43233e-10	0.218902	0.386	0.265	8.07564e-06	Phloem	SORBI-3007G065500
Zm00001d003994	1.53849e-10	-0.219325	0.036	0.137	8.67416e-06	Phloem	SORBI-3006G046500
SORBI-3009G107200	1.5536e-10	0.128875	0.248	0.139	8.75935e-06	Phloem	SORBI-3009G107200
Zm00001d017119	1.63923e-10	0.365497	0.451	0.342	9.24216e-06	Phloem	SORBI-3004G204900
SORBI-3003G403700	1.65757e-10	0.302589	0.379	0.262	9.34557e-06	Phloem	SORBI-3003G403700
SORBI-3002G357600	1.69976e-10	0.133315	0.153	0.074	9.5834e-06	Phloem	SORBI-3002G357600
SORBI-3005G101800	1.78113e-10	0.234955	0.144	0.07	1.00422e-05	Phloem	SORBI-3005G101800
Zm00001d033484	1.80174e-10	0.133814	0.142	0.067	1.01584e-05	Phloem	SORBI-3001G149600
Zm00001d033855	1.90019e-10	-0.2369	0.127	0.268	1.07135e-05	Phloem	SORBI-3001G106600
Zm00001d003504	1.93496e-10	0.333787	0.392	0.287	1.09095e-05	Phloem	SORBI-3006G099700
Zm00001d050324	1.97979e-10	0.107331	0.201	0.111	1.11622e-05	Phloem	SORBI-3007G128500
SORBI-3005G122500	1.98202e-10	0.343272	0.307	0.192	1.11748e-05	Phloem	SORBI-3005G122500
SORBI-3007G023400	1.99211e-10	0.279209	0.561	0.479	1.12317e-05	Phloem	SORBI-3007G023400
SORBI-3001G301000	1.99558e-10	-0.323678	0.036	0.139	1.12513e-05	Phloem	SORBI-3001G301000
Zm00001d038321	2.12579e-10	0.142481	0.273	0.166	1.19854e-05	Phloem	SORBI-3009G151400
Zm00001d008449	2.19083e-10	0.101821	0.129	0.059	1.23521e-05	Phloem	SORBI-3003G098700
SORBI-3002G328400	2.31725e-10	-0.129962	0.021	0.115	1.30649e-05	Phloem	SORBI-3002G328400
SORBI-3003G324400	2.36442e-10	0.474381	0.4	0.307	1.33308e-05	Phloem	SORBI-3003G324400
Zm00001d031127	2.48028e-10	0.197278	0.316	0.201	1.39841e-05	Phloem	SORBI-3008G177800
Zm00001d003264	2.51023e-10	-0.177056	0.038	0.142	1.41529e-05	Phloem	SORBI-3006G125100
SORBI-3006G060000	2.52335e-10	0.108812	0.178	0.089	1.42269e-05	Phloem	SORBI-3006G060000
SORBI-3001G335000	2.72945e-10	0.10324	0.301	0.186	1.53889e-05	Phloem	SORBI-3001G335000
SORBI-3006G198800	3.17383e-10	-1.241	0.307	0.408	1.78944e-05	Phloem	SORBI-3006G198800
SORBI-3003G404200	3.26134e-10	-0.124972	0.015	0.105	1.83877e-05	Phloem	SORBI-3003G404200
SORBI-3001G374400	3.39033e-10	-0.300929	0.123	0.24	1.9115e-05	Phloem	SORBI-3001G374400
Zm00001d027539	3.4514e-10	0.451597	0.114	0.05	1.94593e-05	Phloem	SORBI-3001G514400
SORBI-3001G098600	3.88903e-10	0.139771	0.258	0.153	2.19267e-05	Phloem	SORBI-3001G098600
Zm00001d009445	3.90576e-10	0.234291	0.413	0.299	2.20211e-05	Phloem	SORBI-3009G217900
Zm00001d002035	4.08279e-10	-0.20623	0.023	0.117	2.30192e-05	Phloem	SORBI-3006G244400
SORBI-3007G169700	4.27371e-10	-0.577194	0.184	0.295	2.40956e-05	Phloem	SORBI-3007G169700
Zm00001d021781	4.33001e-10	-0.292637	0.017	0.105	2.4413e-05	Phloem	SORBI-3002G339100
Zm00001d019300	4.33191e-10	-0.440744	0.051	0.152	2.44237e-05	Phloem	SORBI-3002G092400
Zm00001d018284	4.94188e-10	-0.204997	0.053	0.16	2.78628e-05	Phloem	SORBI-3004G319100
SORBI-3009G209900	5.15454e-10	0.267655	0.515	0.42	2.90618e-05	Phloem	SORBI-3009G209900
Zm00001d017847	5.18989e-10	0.297403	0.604	0.601	2.92611e-05	Phloem	SORBI-3004G260200
Zm00001d041826	5.2662e-10	0.233435	0.331	0.214	2.96914e-05	Phloem	SORBI-3008G066000
SORBI-3004G024200	5.32787e-10	0.406936	0.375	0.272	3.0039e-05	Phloem	SORBI-3004G024200
Zm00001d039656	5.4146e-10	0.153959	0.383	0.257	3.05281e-05	Phloem	SORBI-3003G049200
SORBI-3002G354900	5.52507e-10	0.190971	0.375	0.245	3.11509e-05	Phloem	SORBI-3002G354900
Zm00001d005391	5.81856e-10	-0.254878	0.112	0.231	3.28056e-05	Phloem	SORBI-3002G130700
SORBI-3003G116900	5.82564e-10	0.247438	0.449	0.336	3.28455e-05	Phloem	SORBI-3003G116900
Zm00001d004513	5.88615e-10	0.113701	0.216	0.123	3.31867e-05	Phloem	SORBI-3006G008700
SORBI-3007G170900	5.89943e-10	0.188762	0.263	0.161	3.32616e-05	Phloem	SORBI-3007G170900
SORBI-3003G041200	5.99973e-10	0.318042	0.39	0.28	3.38271e-05	Phloem	SORBI-3003G041200
SORBI-3004G042300	6.1402e-10	0.123266	0.206	0.114	3.46191e-05	Phloem	SORBI-3004G042300
Zm00001d003310	6.48168e-10	-0.313924	0.468	0.639	3.65444e-05	Phloem	SORBI-3006G119100
SORBI-3004G086400	6.50875e-10	-0.21857	0.03	0.123	3.6697e-05	Phloem	SORBI-3004G086400
SORBI-3010G040100	6.56429e-10	-0.202232	0.114	0.243	3.70101e-05	Phloem	SORBI-3010G040100
Zm00001d030934	6.7675e-10	0.251494	0.492	0.387	3.81559e-05	Phloem	SORBI-3008G150300
SORBI-3009G141800	7.07634e-10	0.609342	0.765	0.774	3.98971e-05	Phloem	SORBI-3009G141800
SORBI-3005G111700	7.22379e-10	0.132649	0.267	0.165	4.07284e-05	Phloem	SORBI-3005G111700
Zm00001d049091	7.43386e-10	0.213494	0.396	0.275	4.19129e-05	Phloem	SORBI-3005G107300
SORBI-3002G104900	7.49099e-10	0.773575	0.555	0.52	4.22349e-05	Phloem	SORBI-3002G104900
SORBI-3001G465100	7.52717e-10	0.312797	0.394	0.289	4.24389e-05	Phloem	SORBI-3001G465100
SORBI-3010G061800	7.96581e-10	0.13569	0.341	0.223	4.4912e-05	Phloem	SORBI-3010G061800
Zm00001d014609	9.05302e-10	0.140518	0.165	0.085	5.10418e-05	Phloem	SORBI-3010G246000
SORBI-3008G046600	9.14715e-10	0.210312	0.343	0.233	5.15725e-05	Phloem	SORBI-3008G046600
Zm00001d032810	9.7756e-10	-0.383338	0.138	0.249	5.51158e-05	Phloem	SORBI-3001G230700
SORBI-3005G074400	9.97327e-10	-0.223562	0.456	0.613	5.62303e-05	Phloem	SORBI-3005G074400
Zm00001d016031	1.00107e-09	-0.269839	0.108	0.222	5.64412e-05	Phloem	SORBI-3004G121200
Zm00001d014585	1.04343e-09	0.268342	0.43	0.313	5.88295e-05	Phloem	SORBI-3010G243200
SORBI-3004G023900	1.05656e-09	-0.246655	0.256	0.388	5.95701e-05	Phloem	SORBI-3004G023900
Zm00001d031975	1.064e-09	0.228907	0.661	0.621	5.99894e-05	Phloem	SORBI-3007G172300
SORBI-3004G292900	1.16116e-09	-0.764589	0.583	0.686	6.54676e-05	Phloem	SORBI-3004G292900
SORBI-3001G243100	1.26292e-09	0.375289	0.477	0.42	7.12044e-05	Phloem	SORBI-3001G243100
Zm00001d034482	1.27801e-09	0.195959	0.222	0.126	7.20557e-05	Phloem	SORBI-3001G054500
SORBI-3001G125900	1.29946e-09	-0.478879	0.136	0.249	7.32647e-05	Phloem	SORBI-3001G125900
Zm00001d015032	1.33198e-09	-0.320611	0.125	0.232	7.50985e-05	Phloem	SORBI-3004G016800
SORBI-3006G108700	1.34263e-09	0.10499	0.191	0.103	7.5699e-05	Phloem	SORBI-3006G108700
Zm00001d020537	1.40745e-09	0.174391	0.256	0.16	7.93534e-05	Phloem	SORBI-3002G206200
Zm00001d029783	1.41855e-09	0.406357	0.341	0.239	7.99792e-05	Phloem	SORBI-3001G311000
SORBI-3005G168800	1.43658e-09	-0.232369	0.256	0.415	8.0996e-05	Phloem	SORBI-3005G168800
Zm00001d030526	1.44243e-09	0.159162	0.242	0.142	8.13255e-05	Phloem	SORBI-3001G261476
Zm00001d032081	1.48969e-09	-0.16292	0.034	0.128	8.39903e-05	Phloem	SORBI-3007G148200
Zm00001d043929	1.54484e-09	-0.516302	0.195	0.313	8.70997e-05	Phloem	SORBI-3003G250700
SORBI-3002G241400	1.57366e-09	0.332541	0.322	0.211	8.87245e-05	Phloem	SORBI-3002G241400
Zm00001d021900	1.6476e-09	-0.27301	0.021	0.107	9.28933e-05	Phloem	SORBI-3002G351300
Zm00001d052835	1.72979e-09	-0.252115	0.123	0.251	9.75275e-05	Phloem	SORBI-3007G220400
SORBI-3003G228200	1.77338e-09	-0.391559	0.193	0.314	9.99852e-05	Phloem	SORBI-3003G228200
Zm00001d049881	1.77833e-09	-0.175301	0.064	0.17	0.000100264	Phloem	SORBI-3007G161400
Zm00001d043253	1.91624e-09	0.301161	0.383	0.273	0.000108039	Phloem	SORBI-3003G319500
SORBI-3010G182200	1.94104e-09	-0.202256	0.852	0.852	0.000109438	Phloem	SORBI-3010G182200
Zm00001d049166	1.94275e-09	-0.233515	0.157	0.285	0.000109534	Phloem	SORBI-3005G120500
Zm00001d041220	2.00723e-09	0.124378	0.233	0.135	0.000113169	Phloem	SORBI-3008G188400
SORBI-3004G225800	2.00951e-09	0.133266	0.117	0.053	0.000113298	Phloem	SORBI-3004G225800
Zm00001d003657	2.05082e-09	0.207012	0.169	0.09	0.000115627	Phloem	SORBI-3006G083201
Zm00001d019725	2.07182e-09	0.439158	0.326	0.217	0.000116811	Phloem	SORBI-3002G140300
Zm00001d027415	2.1411e-09	0.114147	0.121	0.057	0.000120718	Phloem	SORBI-3001G527700
Zm00001d034733	2.2565e-09	-0.168717	0.064	0.169	0.000127224	Phloem	SORBI-3001G026000
SORBI-3002G175100	2.34476e-09	-0.187178	0.947	0.908	0.0001322	Phloem	SORBI-3002G175100
Zm00001d045043.2	2.35023e-09	-0.191081	0.053	0.152	0.000132508	Phloem	Zm00001d045043.2
Zm00001d045203	2.3703e-09	-0.265504	0.034	0.122	0.00013364	Phloem	SORBI-3010G052700
Zm00001d029619	2.42709e-09	-0.22779	0.032	0.12	0.000136842	Phloem	SORBI-3001G325400
Zm00001d038327	2.43733e-09	0.409745	0.392	0.296	0.000137419	Phloem	SORBI-3009G149800
SORBI-3003G013600	2.48749e-09	-0.301167	0.053	0.151	0.000140247	Phloem	SORBI-3003G013600
SORBI-3009G120800	2.57322e-09	0.303223	0.347	0.23	0.000145081	Phloem	SORBI-3009G120800
Zm00001d016446	2.74884e-09	0.17153	0.362	0.249	0.000154982	Phloem	SORBI-3004G142800
Zm00001d032938	2.76447e-09	-0.203267	0.053	0.148	0.000155863	Phloem	SORBI-3001G245800
SORBI-3001G192200	3.09419e-09	0.363545	0.265	0.167	0.000174453	Phloem	SORBI-3001G192200
Zm00001d053740	3.09713e-09	0.375258	0.337	0.231	0.000174619	Phloem	SORBI-3004G064900
SORBI-3001G330100	3.32124e-09	0.420179	0.311	0.213	0.000187255	Phloem	SORBI-3001G330100
SORBI-3001G035000	3.452e-09	0.382556	0.347	0.238	0.000194627	Phloem	SORBI-3001G035000
Zm00001d001868	3.45596e-09	0.163599	0.288	0.186	0.00019485	Phloem	SORBI-3006G263100
Zm00001d017101	3.51859e-09	0.22105	0.381	0.265	0.000198382	Phloem	SORBI-3004G203200
SORBI-3004G273300	3.52034e-09	0.409422	0.413	0.314	0.00019848	Phloem	SORBI-3004G273300
SORBI-3006G210300	3.62295e-09	0.474401	0.403	0.31	0.000204265	Phloem	SORBI-3006G210300
SORBI-3001G334900	3.65052e-09	0.133057	0.233	0.138	0.00020582	Phloem	SORBI-3001G334900
SORBI-3004G170500	3.6856e-09	-0.342279	0.36	0.5	0.000207798	Phloem	SORBI-3004G170500
Zm00001d032992	3.78971e-09	0.262981	0.326	0.224	0.000213668	Phloem	SORBI-3001G252300
Zm00001d038791	3.85026e-09	0.133691	0.233	0.137	0.000217082	Phloem	SORBI-3009G203600
SORBI-3007G140900	3.97365e-09	-0.175375	0.047	0.141	0.000224038	Phloem	SORBI-3007G140900
Zm00001d018482	4.06158e-09	0.102082	0.18	0.099	0.000228996	Phloem	SORBI-3004G345100
Zm00001d003016	4.09388e-09	-0.175109	0.059	0.161	0.000230817	Phloem	SORBI-3006G148800
SORBI-3001G322200	4.13555e-09	0.18933	0.288	0.184	0.000233166	Phloem	SORBI-3001G322200
SORBI-3010G218300	4.26914e-09	-0.220015	0.172	0.306	0.000240698	Phloem	SORBI-3010G218300
SORBI-3010G278000	4.31544e-09	0.159927	0.248	0.155	0.000243309	Phloem	SORBI-3010G278000
Zm00001d048533	4.64494e-09	0.627546	0.383	0.318	0.000261886	Phloem	SORBI-3001G538866
Zm00001d031278	4.6753e-09	0.183444	0.275	0.172	0.000263598	Phloem	SORBI-3007G223200
Zm00001d026126	4.68372e-09	0.130861	0.225	0.133	0.000264073	Phloem	SORBI-3006G179500
SORBI-3001G107200	5.08763e-09	-0.164207	0.801	0.898	0.000286846	Phloem	SORBI-3001G107200
SORBI-3001G425600	5.10846e-09	0.235909	0.186	0.104	0.00028802	Phloem	SORBI-3001G425600
SORBI-3001G402200	5.1296e-09	0.509592	0.411	0.323	0.000289212	Phloem	SORBI-3001G402200
Zm00001d017545	5.26052e-09	-0.277024	0.097	0.212	0.000296593	Phloem	SORBI-3004G287000
Zm00001d033853	5.31313e-09	0.207411	0.292	0.191	0.00029956	Phloem	SORBI-3001G106900
SORBI-3004G001000	5.32872e-09	-0.152348	0.07	0.178	0.000300438	Phloem	SORBI-3004G001000
SORBI-3002G292500	5.34812e-09	-0.661951	0.081	0.179	0.000301532	Phloem	SORBI-3002G292500
Zm00001d045540	5.37746e-09	0.138305	0.299	0.196	0.000303187	Phloem	SORBI-3010G012300
SORBI-3003G052600	5.39774e-09	0.108081	0.227	0.135	0.00030433	Phloem	SORBI-3003G052600
SORBI-3004G224800	5.49131e-09	0.166162	0.322	0.215	0.000309606	Phloem	SORBI-3004G224800
Zm00001d017347	5.58731e-09	0.115711	0.284	0.18	0.000315018	Phloem	SORBI-3004G225500
SORBI-3009G219700	6.00732e-09	-0.124122	0.044	0.141	0.000338699	Phloem	SORBI-3009G219700
Zm00001d028815.5	6.05978e-09	0.816744	0.352	0.264	0.000341657	Phloem	Zm00001d028815.5
SORBI-3001G084100	6.10606e-09	-0.277918	0.739	0.789	0.000344266	Phloem	SORBI-3001G084100
Zm00001d046234	6.12148e-09	-0.529258	0.292	0.391	0.000345135	Phloem	SORBI-3010G168800
Zm00001d030953	6.13481e-09	-0.174428	0.051	0.144	0.000345886	Phloem	SORBI-3008G152600
SORBI-3002G213600	6.15688e-09	0.446304	0.403	0.304	0.000347131	Phloem	SORBI-3002G213600
SORBI-3004G007300	6.28988e-09	0.197255	0.525	0.407	0.00035463	Phloem	SORBI-3004G007300
Zm00001d048416	6.54747e-09	-0.177659	0.04	0.133	0.000369153	Phloem	SORBI-3001G500200
Zm00001d002163	6.68391e-09	-0.135634	0.061	0.161	0.000376846	Phloem	SORBI-3006G230400
Zm00001d039038	6.74313e-09	-0.169527	0.178	0.317	0.000380185	Phloem	SORBI-3009G234400
Zm00001d017752	6.77182e-09	0.191316	0.248	0.154	0.000381802	Phloem	SORBI-3004G269500
SORBI-3001G132100	7.09936e-09	0.291169	0.43	0.342	0.000400269	Phloem	SORBI-3001G132100
Zm00001d017991	7.14783e-09	0.447411	0.375	0.272	0.000403002	Phloem	SORBI-3004G243100
SORBI-3003G350700	7.30383e-09	0.153816	0.182	0.1	0.000411797	Phloem	SORBI-3003G350700
SORBI-3004G143900	7.54962e-09	-0.13255	0.064	0.164	0.000425655	Phloem	SORBI-3004G143900
SORBI-3009G163800	7.59051e-09	-0.144062	0.972	0.969	0.00042796	Phloem	SORBI-3009G163800
SORBI-3010G084600	7.94847e-09	0.33134	0.343	0.231	0.000448143	Phloem	SORBI-3010G084600
SORBI-3009G175300	7.96176e-09	-0.1594	0.231	0.368	0.000448892	Phloem	SORBI-3009G175300
Zm00001d031599	7.98847e-09	0.174941	0.275	0.178	0.000450398	Phloem	SORBI-3007G195100
Zm00001d003485	8.24521e-09	-0.217615	0.053	0.148	0.000464873	Phloem	SORBI-3006G101100
Zm00001d016471	8.38813e-09	0.240046	0.218	0.131	0.000472931	Phloem	SORBI-3004G141200
SORBI-3001G294000	8.48846e-09	0.135318	0.305	0.2	0.000478588	Phloem	SORBI-3001G294000
SORBI-3009G009800	8.51762e-09	-0.451308	0.04	0.126	0.000480232	Phloem	SORBI-3009G009800
Zm00001d013010	8.62922e-09	0.10615	0.263	0.161	0.000486524	Phloem	SORBI-3001G041200
SORBI-3001G488900	9.14464e-09	-0.224612	0.07	0.173	0.000515584	Phloem	SORBI-3001G488900
Zm00001d028572	9.16972e-09	-0.197662	0.201	0.328	0.000516998	Phloem	SORBI-3001G424500
Zm00001d026671	9.20957e-09	0.151857	0.299	0.192	0.000519245	Phloem	SORBI-3006G275200
Zm00001d010614	9.2915e-09	-0.204066	0.862	0.843	0.000523864	Phloem	SORBI-3009G173500
Zm00001d049381	9.32792e-09	0.45733	0.367	0.255	0.000525918	Phloem	SORBI-3007G074000
Zm00001d017053	9.33158e-09	0.126351	0.157	0.084	0.000526124	Phloem	SORBI-3004G198800
Zm00001d009243	9.57821e-09	-0.147938	0.032	0.119	0.000540029	Phloem	SORBI-3003G160200
Zm00001d015829	9.85449e-09	0.104839	0.29	0.179	0.000555606	Phloem	SORBI-3004G079900
SORBI-3010G182600	1.00271e-08	-0.152795	0.922	0.919	0.00056534	Phloem	SORBI-3010G182600
Zm00001d012485	1.0109e-08	-0.238011	0.136	0.245	0.000569958	Phloem	SORBI-3003G340800
Zm00001d034722	1.03976e-08	0.208658	0.316	0.21	0.000586229	Phloem	SORBI-3001G028000
Zm00001d046812	1.04027e-08	0.315849	0.301	0.199	0.000586517	Phloem	SORBI-3010G210600
Zm00001d026573.1	1.05522e-08	0.111535	0.318	0.204	0.000594941	Phloem	Zm00001d026573.1
SORBI-3007G180300	1.06069e-08	0.116423	0.165	0.091	0.00059803	Phloem	SORBI-3007G180300
SORBI-3003G195500	1.09528e-08	0.292594	0.475	0.388	0.000617527	Phloem	SORBI-3003G195500
SORBI-3002G265800	1.18029e-08	-0.573822	0.186	0.284	0.000665459	Phloem	SORBI-3002G265800
Zm00001d009525	1.20271e-08	0.138573	0.186	0.105	0.000678099	Phloem	SORBI-3009G229000
SORBI-3003G429000	1.20866e-08	0.10015	0.326	0.208	0.000681455	Phloem	SORBI-3003G429000
SORBI-3003G400200	1.21666e-08	-0.320736	0.091	0.192	0.000685968	Phloem	SORBI-3003G400200
Zm00001d014748	1.22274e-08	-0.398978	0.042	0.129	0.000689393	Phloem	SORBI-3010G259300
SORBI-3006G188700	1.24149e-08	0.173975	0.233	0.142	0.000699964	Phloem	SORBI-3006G188700
Zm00001d023694	1.24252e-08	0.204533	0.318	0.211	0.000700543	Phloem	SORBI-3008G062200
Zm00001d029826	1.28194e-08	0.124141	0.239	0.145	0.000722771	Phloem	SORBI-3001G307900
Zm00001d010171	1.29616e-08	0.330042	0.576	0.511	0.000730787	Phloem	SORBI-3009G152600
Zm00001d028450	1.34588e-08	0.176993	0.39	0.279	0.000758823	Phloem	SORBI-3001G434400
Zm00001d052322	1.38765e-08	0.267184	0.354	0.255	0.000782373	Phloem	SORBI-3005G005600
Zm00001d022124	1.41813e-08	-0.176998	0.888	0.884	0.000799555	Phloem	SORBI-3002G372400
SORBI-3006G263600	1.44481e-08	0.252912	0.371	0.258	0.0008146	Phloem	SORBI-3006G263600
Zm00001d038310	1.48511e-08	0.170414	0.339	0.229	0.000837317	Phloem	SORBI-3009G152200
Zm00001d053296	1.49183e-08	0.252744	0.578	0.518	0.000841111	Phloem	SORBI-3004G130100
Zm00001d017700	1.50157e-08	0.164253	0.267	0.171	0.000846598	Phloem	SORBI-3004G273100
SORBI-3010G271200	1.57798e-08	-0.1228	0.076	0.182	0.000889681	Phloem	SORBI-3010G271200
SORBI-3003G430400	1.58052e-08	0.212275	0.244	0.149	0.00089111	Phloem	SORBI-3003G430400
Zm00001d049954	1.58547e-08	0.507287	0.398	0.322	0.000893903	Phloem	SORBI-3007G171000
Zm00001d002342	1.65211e-08	0.137145	0.176	0.098	0.000931475	Phloem	SORBI-3006G212400
SORBI-3002G159900	1.66896e-08	-0.285373	0.415	0.515	0.000940974	Phloem	SORBI-3002G159900
Zm00001d010840	1.72322e-08	-0.329815	0.282	0.42	0.000971568	Phloem	SORBI-3009G048100
SORBI-3001G348100	1.73348e-08	-0.163527	0.131	0.25	0.000977354	Phloem	SORBI-3001G348100
Zm00001d046852	1.75985e-08	0.100595	0.201	0.116	0.000992224	Phloem	SORBI-3010G212000
SORBI-3003G282901	1.76553e-08	0.22169	0.324	0.216	0.000995422	Phloem	SORBI-3003G282901
Zm00001d018795	1.84925e-08	-0.313161	0.038	0.123	0.00104263	Phloem	SORBI-3002G033700
SORBI-3001G253600	1.89241e-08	0.11378	0.195	0.114	0.00106696	Phloem	SORBI-3001G253600
Zm00001d035440	1.943e-08	0.487568	0.54	0.51	0.00109548	Phloem	SORBI-3009G030100
SORBI-3010G084300	2.00568e-08	-0.149281	0.061	0.16	0.00113082	Phloem	SORBI-3010G084300
SORBI-3001G451500	2.04404e-08	-0.387233	0.068	0.164	0.00115245	Phloem	SORBI-3001G451500
Zm00001d003757	2.13452e-08	-0.755384	0.03	0.11	0.00120347	Phloem	SORBI-3006G074200
Zm00001d037972	2.13638e-08	-0.195083	0.788	0.795	0.00120451	Phloem	SORBI-3009G105600
SORBI-3002G382100	2.13846e-08	-0.534666	0.049	0.139	0.00120569	Phloem	SORBI-3002G382100
Zm00001d034621	2.16143e-08	-0.432372	0.059	0.151	0.00121864	Phloem	SORBI-3001G038300
Zm00001d045680	2.2795e-08	-0.360747	0.121	0.233	0.00128521	Phloem	SORBI-3010G110800
SORBI-3009G132800	2.28894e-08	0.124198	0.167	0.093	0.00129053	Phloem	SORBI-3009G132800
SORBI-3001G425500	2.37722e-08	0.166133	0.148	0.078	0.0013403	Phloem	SORBI-3001G425500
SORBI-3002G296200	2.41119e-08	0.248354	0.619	0.573	0.00135945	Phloem	SORBI-3002G296200
Zm00001d050317.1	2.46088e-08	-0.17864	0.095	0.202	0.00138747	Phloem	Zm00001d050317.1
SORBI-3001G314500	2.52343e-08	0.209122	0.347	0.248	0.00142273	Phloem	SORBI-3001G314500
SORBI-3003G218400	2.61434e-08	0.233928	0.657	0.664	0.00147399	Phloem	SORBI-3003G218400
Zm00001d025020	2.75586e-08	-0.166868	0.248	0.381	0.00155378	Phloem	SORBI-3006G029000
SORBI-3006G109700	2.77506e-08	0.233712	0.413	0.312	0.00156461	Phloem	SORBI-3006G109700
Zm00001d042132	2.78933e-08	-0.178419	0.051	0.141	0.00157265	Phloem	SORBI-3003G423000
SORBI-3009G244900	2.87055e-08	-0.159266	0.159	0.287	0.00161844	Phloem	SORBI-3009G244900
Zm00001d002258	2.94281e-08	-0.136487	0.229	0.366	0.00165919	Phloem	SORBI-3006G220800
Zm00001d031543	2.97666e-08	-0.281479	0.21	0.327	0.00167827	Phloem	SORBI-3007G200500
SORBI-3004G225100	3.04725e-08	-0.211353	0.044	0.131	0.00171807	Phloem	SORBI-3004G225100
Zm00001d045396	3.11079e-08	-0.205433	0.036	0.118	0.0017539	Phloem	SORBI-3010G030401
Zm00001d048925	3.14697e-08	0.146208	0.229	0.139	0.00177429	Phloem	SORBI-3005G172900
SORBI-3010G251000	3.19285e-08	0.224329	0.498	0.39	0.00180016	Phloem	SORBI-3010G251000
SORBI-3003G190100	3.3055e-08	0.135746	0.212	0.126	0.00186368	Phloem	SORBI-3003G190100
SORBI-3001G234800	3.44745e-08	-0.331963	0.146	0.246	0.00194371	Phloem	SORBI-3001G234800
SORBI-3002G178800	3.5201e-08	-0.479673	0.028	0.106	0.00198467	Phloem	SORBI-3002G178800
Zm00001d012850	3.52082e-08	0.161303	0.341	0.23	0.00198507	Phloem	SORBI-3001G012800
SORBI-3001G463400	3.58157e-08	0.111165	0.159	0.087	0.00201933	Phloem	SORBI-3001G463400
SORBI-3006G173900	3.66066e-08	0.87594	0.432	0.397	0.00206392	Phloem	SORBI-3006G173900
Zm00001d005008	3.67879e-08	0.110724	0.136	0.07	0.00207414	Phloem	SORBI-3005G021900
SORBI-3003G246700	3.71679e-08	0.291368	0.532	0.465	0.00209557	Phloem	SORBI-3003G246700
SORBI-3001G061500	3.89379e-08	0.351992	0.46	0.398	0.00219536	Phloem	SORBI-3001G061500
Zm00001d022388	3.90091e-08	0.294912	0.311	0.212	0.00219937	Phloem	SORBI-3002G402700
Zm00001d043941	3.92862e-08	0.128381	0.267	0.171	0.002215	Phloem	SORBI-3003G249900
SORBI-3009G239900	3.9608e-08	-0.177324	0.161	0.29	0.00223314	Phloem	SORBI-3009G239900
Zm00001d043348.1	3.98078e-08	-0.194838	0.072	0.17	0.0022444	Phloem	Zm00001d043348.1
Zm00001d049413	4.02936e-08	0.115969	0.267	0.172	0.00227179	Phloem	SORBI-3007G068000
SORBI-3006G209400	4.04411e-08	0.129905	0.301	0.197	0.00228011	Phloem	SORBI-3006G209400
Zm00001d048417	4.05159e-08	-0.262559	0.091	0.187	0.00228432	Phloem	SORBI-3001G500000
SORBI-3001G070000	4.08597e-08	0.240088	0.46	0.365	0.00230371	Phloem	SORBI-3001G070000
Zm00001d016477	4.09912e-08	0.132487	0.316	0.208	0.00231113	Phloem	SORBI-3004G144500
SORBI-3002G306400	4.09994e-08	0.229939	0.424	0.336	0.00231159	Phloem	SORBI-3002G306400
SORBI-3003G345700	4.10579e-08	-0.210847	0.093	0.19	0.00231488	Phloem	SORBI-3003G345700
Zm00001d039776	4.2697e-08	0.208341	0.371	0.274	0.0024073	Phloem	SORBI-3003G063200
SORBI-3003G044900	4.29402e-08	0.250197	0.398	0.293	0.00242101	Phloem	SORBI-3003G044900
Zm00001d052224	4.36789e-08	-0.183219	0.502	0.67	0.00246266	Phloem	SORBI-3004G232700
SORBI-3009G229600	4.39119e-08	-0.209765	0.189	0.31	0.00247579	Phloem	SORBI-3009G229600
Zm00001d030158	4.50598e-08	-0.201025	0.028	0.105	0.00254052	Phloem	SORBI-3001G282000
Zm00001d003420	4.68599e-08	-0.177864	0.072	0.165	0.00264201	Phloem	SORBI-3006G106800
SORBI-3001G012500	4.68981e-08	-0.140481	0.496	0.698	0.00264416	Phloem	SORBI-3001G012500
Zm00001d048669	4.7416e-08	0.122033	0.133	0.068	0.00267336	Phloem	SORBI-3005G211500
Zm00001d028815.4	4.81545e-08	0.473692	0.331	0.232	0.002715	Phloem	Zm00001d028815.4
SORBI-3004G078000	4.90553e-08	0.306743	0.472	0.401	0.00276578	Phloem	SORBI-3004G078000
SORBI-3010G092600	5.10398e-08	-0.245749	0.064	0.16	0.00287767	Phloem	SORBI-3010G092600
SORBI-3010G066700	5.41038e-08	0.17419	0.112	0.055	0.00305043	Phloem	SORBI-3010G066700
SORBI-3002G416600	5.52191e-08	-0.349331	0.036	0.116	0.00311331	Phloem	SORBI-3002G416600
SORBI-3004G284400	5.54206e-08	0.167028	0.297	0.197	0.00312467	Phloem	SORBI-3004G284400
Zm00001d044857	5.57359e-08	0.191054	0.318	0.21	0.00314245	Phloem	SORBI-3010G089700
SORBI-3006G139700	5.74016e-08	0.158641	0.28	0.184	0.00323636	Phloem	SORBI-3006G139700
Zm00001d039487	5.88102e-08	0.174206	0.127	0.064	0.00331578	Phloem	SORBI-3003G033900
Zm00001d003247	6.10898e-08	-0.368759	0.102	0.194	0.0034443	Phloem	SORBI-3006G127100
Zm00001d042540	6.23636e-08	-0.293385	0.163	0.283	0.00351612	Phloem	SORBI-3003G385900
SORBI-3003G280700	6.25838e-08	-0.215163	0.792	0.781	0.00352854	Phloem	SORBI-3003G280700
Zm00001d009771	6.50571e-08	0.135662	0.244	0.152	0.00366799	Phloem	SORBI-3009G258100
Zm00001d052340	6.53425e-08	-0.162789	0.044	0.128	0.00368408	Phloem	SORBI-3005G012000
Zm00001d039105	6.65883e-08	-0.125362	0.053	0.143	0.00375432	Phloem	SORBI-3009G242200
Zm00001d021775	6.72412e-08	0.522128	0.398	0.335	0.00379113	Phloem	SORBI-3002G338500
Zm00001d028733	6.77363e-08	0.149963	0.358	0.259	0.00381904	Phloem	SORBI-3001G408200
SORBI-3009G056200	6.93681e-08	-0.290936	0.25	0.352	0.00391104	Phloem	SORBI-3009G056200
SORBI-3001G009800	6.95619e-08	-0.233749	0.233	0.345	0.00392197	Phloem	SORBI-3001G009800
SORBI-3001G217500	7.11072e-08	-0.219805	0.068	0.16	0.0040091	Phloem	SORBI-3001G217500
SORBI-3008G180900	7.12063e-08	0.16046	0.331	0.232	0.00401468	Phloem	SORBI-3008G180900
Zm00001d022561	7.21183e-08	0.104236	0.157	0.087	0.0040661	Phloem	SORBI-3002G426700
Zm00001d029595	7.23728e-08	0.253381	0.583	0.539	0.00408045	Phloem	SORBI-3001G329300
SORBI-3001G504100	7.26735e-08	-0.317725	0.066	0.153	0.0040974	Phloem	SORBI-3001G504100
Zm00001d014887	7.47255e-08	-0.197862	0.636	0.764	0.0042131	Phloem	SORBI-3010G277300
Zm00001d045599	7.72575e-08	-0.22985	0.136	0.25	0.00435586	Phloem	SORBI-3010G003100
SORBI-3004G107900	7.91289e-08	-0.302991	0.203	0.314	0.00446137	Phloem	SORBI-3004G107900
SORBI-3002G392000	8.3111e-08	-0.4345	0.064	0.151	0.00468588	Phloem	SORBI-3002G392000
SORBI-3003G143700	8.41316e-08	-0.230916	0.521	0.607	0.00474342	Phloem	SORBI-3003G143700
Zm00001d003081	8.52061e-08	0.311973	0.498	0.436	0.00480401	Phloem	SORBI-3006G141700
SORBI-3001G300500	8.62068e-08	-0.228733	0.066	0.158	0.00486042	Phloem	SORBI-3001G300500
Zm00001d033633	8.63795e-08	0.380214	0.375	0.292	0.00487016	Phloem	SORBI-3001G125000
SORBI-3001G157800	8.7095e-08	0.102898	0.172	0.097	0.0049105	Phloem	SORBI-3001G157800
Zm00001d028963	8.71845e-08	0.190057	0.551	0.437	0.00491555	Phloem	SORBI-3001G388600
SORBI-3003G191500	8.97512e-08	-0.182139	0.263	0.391	0.00506026	Phloem	SORBI-3003G191500
Zm00001d038453	9.23255e-08	-0.263281	0.155	0.272	0.0052054	Phloem	SORBI-3009G172500
Zm00001d040567	9.28668e-08	-0.122504	0.042	0.123	0.00523592	Phloem	SORBI-3003G139500
SORBI-3010G041700	9.52885e-08	0.174845	0.292	0.197	0.00537246	Phloem	SORBI-3010G041700
SORBI-3009G076400	9.78184e-08	-0.15355	0.881	0.866	0.0055151	Phloem	SORBI-3009G076400
Zm00001d049234	1.01396e-07	-0.189934	0.767	0.783	0.00571681	Phloem	SORBI-3005G113300
SORBI-3005G178100	1.02666e-07	0.147178	0.278	0.182	0.00578841	Phloem	SORBI-3005G178100
SORBI-3010G083300	1.05565e-07	0.11128	0.225	0.141	0.00595186	Phloem	SORBI-3010G083300
Zm00001d027656	1.05627e-07	0.103313	0.161	0.09	0.00595537	Phloem	SORBI-3001G504900
Zm00001d013276	1.07097e-07	0.100896	0.222	0.137	0.00603823	Phloem	SORBI-3001G090600
Zm00001d015968	1.09427e-07	-0.242445	0.199	0.315	0.00616962	Phloem	SORBI-3004G132300
SORBI-3004G171400	1.11381e-07	-0.225666	0.089	0.179	0.00627978	Phloem	SORBI-3004G171400
SORBI-3001G057300	1.11966e-07	-0.231472	0.68	0.74	0.00631275	Phloem	SORBI-3001G057300
Zm00001d038839	1.12427e-07	0.235998	0.667	0.655	0.00633874	Phloem	SORBI-3009G212200
SORBI-3003G317200	1.13358e-07	0.190741	0.307	0.21	0.00639126	Phloem	SORBI-3003G317200
Zm00001d011162	1.15659e-07	0.244382	0.549	0.492	0.00652098	Phloem	SORBI-3003G189000
Zm00001d042872	1.22299e-07	0.11806	0.22	0.138	0.00689532	Phloem	SORBI-3003G355300
Zm00001d028918	1.29238e-07	0.224862	0.629	0.616	0.00728655	Phloem	SORBI-3001G392800
SORBI-3009G077400	1.30049e-07	0.153557	0.782	0.739	0.00733232	Phloem	SORBI-3009G077400
Zm00001d034064	1.32818e-07	0.242953	0.513	0.43	0.0074884	Phloem	SORBI-3001G084900
Zm00001d052061	1.34808e-07	0.197034	0.335	0.233	0.00760061	Phloem	SORBI-3004G325700
SORBI-3009G033600	1.36323e-07	-0.22471	0.718	0.732	0.00768601	Phloem	SORBI-3009G033600
Zm00001d040715	1.38273e-07	-0.181777	0.883	0.862	0.00779594	Phloem	SORBI-3003G152600
Zm00001d049661	1.39992e-07	0.133456	0.303	0.204	0.00789289	Phloem	SORBI-3007G020300
SORBI-3010G262500	1.40781e-07	0.142391	0.407	0.301	0.00793737	Phloem	SORBI-3010G262500
SORBI-3004G105100	1.44023e-07	-0.258602	0.208	0.332	0.00812018	Phloem	SORBI-3004G105100
SORBI-3009G191200	1.45202e-07	-0.123086	0.377	0.553	0.00818661	Phloem	SORBI-3009G191200
SORBI-3009G033700	1.46461e-07	0.182738	0.413	0.315	0.00825762	Phloem	SORBI-3009G033700
Zm00001d048561	1.47679e-07	0.164231	0.292	0.192	0.0083263	Phloem	SORBI-3001G320700
SORBI-3003G279300	1.47853e-07	0.284149	0.379	0.284	0.00833609	Phloem	SORBI-3003G279300
SORBI-3002G214400	1.49558e-07	0.118946	0.301	0.205	0.00843224	Phloem	SORBI-3002G214400
Zm00001d029457.1	1.52496e-07	0.346044	0.496	0.451	0.00859787	Phloem	Zm00001d029457.1
SORBI-3001G226500	1.5356e-07	-0.223471	0.782	0.777	0.00865785	Phloem	SORBI-3001G226500
Zm00001d007865	1.54557e-07	0.185166	0.28	0.187	0.00871405	Phloem	SORBI-3002G034500
SORBI-3007G118301	1.60538e-07	0.270048	0.273	0.187	0.00905128	Phloem	SORBI-3007G118301
SORBI-3004G331400	1.61464e-07	-0.191266	0.809	0.819	0.00910349	Phloem	SORBI-3004G331400
SORBI-3004G170400	1.63729e-07	0.244699	0.621	0.584	0.00923121	Phloem	SORBI-3004G170400
SORBI-3002G050900	1.66638e-07	0.431936	0.39	0.317	0.00939522	Phloem	SORBI-3002G050900
Zm00001d018464	1.68116e-07	-0.159791	0.097	0.197	0.00947857	Phloem	SORBI-3004G342100
Zm00001d007234	1.68448e-07	-0.178578	0.797	0.804	0.00949728	Phloem	SORBI-3002G431100
Zm00001d044373	1.69231e-07	-0.1617	0.055	0.137	0.0095414	Phloem	SORBI-3003G205600
SORBI-3006G221200	1.75278e-07	-0.214724	0.718	0.745	0.00988237	Phloem	SORBI-3006G221200
Zm00001d021017	1.77414e-07	-0.449013	0.144	0.243	0.0100028	Phloem	SORBI-3002G255000
SORBI-3001G031700	1.787e-07	-0.192332	0.125	0.227	0.0100753	Phloem	SORBI-3001G031700
SORBI-3003G201500	1.82044e-07	0.178586	0.441	0.346	0.0102638	Phloem	SORBI-3003G201500
Zm00001d037052	1.83112e-07	0.267424	0.542	0.465	0.010324	Phloem	SORBI-3010G149300
Zm00001d007091	1.86079e-07	0.119865	0.148	0.082	0.0104913	Phloem	SORBI-3002G405000
Zm00001d039661	1.86191e-07	-0.20806	0.038	0.116	0.0104976	Phloem	SORBI-3003G049700
SORBI-3001G480800	1.86687e-07	-0.313986	0.142	0.239	0.0105256	Phloem	SORBI-3001G480800
Zm00001d031700	1.86706e-07	-0.335232	0.163	0.277	0.0105267	Phloem	SORBI-3007G184700
SORBI-3004G145801	1.9462e-07	-0.184663	0.809	0.803	0.0109728	Phloem	SORBI-3004G145801
Zm00001d027625	1.96454e-07	0.135809	0.445	0.331	0.0110763	Phloem	SORBI-3001G508200
SORBI-3003G048500	1.98628e-07	-0.118081	0.244	0.38	0.0111989	Phloem	SORBI-3003G048500
SORBI-3010G041400	1.993e-07	-0.173007	0.03	0.103	0.0112367	Phloem	SORBI-3010G041400
SORBI-3001G063600	2.04446e-07	-0.204222	0.066	0.151	0.0115269	Phloem	SORBI-3001G063600
SORBI-3002G250400	2.04853e-07	-0.248744	0.286	0.396	0.0115498	Phloem	SORBI-3002G250400
SORBI-3003G219800	2.05448e-07	-0.258249	0.362	0.445	0.0115834	Phloem	SORBI-3003G219800
SORBI-3001G018500	2.12896e-07	0.227671	0.597	0.568	0.0120033	Phloem	SORBI-3001G018500
SORBI-3005G024800	2.13532e-07	-0.162994	0.055	0.14	0.0120391	Phloem	SORBI-3005G024800
Zm00001d033358	2.1371e-07	0.179064	0.231	0.143	0.0120492	Phloem	SORBI-3001G169500
SORBI-3006G160700	2.18154e-07	-0.175186	0.053	0.134	0.0122997	Phloem	SORBI-3006G160700
SORBI-3010G153100	2.20129e-07	0.126039	0.324	0.225	0.0124111	Phloem	SORBI-3010G153100
Zm00001d020400.2	2.2231e-07	-0.11644	0.042	0.123	0.0125341	Phloem	Zm00001d020400.2
SORBI-3002G081600	2.24547e-07	-0.19206	0.816	0.815	0.0126602	Phloem	SORBI-3002G081600
SORBI-3001G177100	2.24905e-07	-0.230989	0.104	0.204	0.0126803	Phloem	SORBI-3001G177100
Zm00001d016566	2.34217e-07	0.202495	0.621	0.537	0.0132054	Phloem	SORBI-3004G155100
Zm00001d048656	2.45927e-07	-0.205906	0.502	0.676	0.0138656	Phloem	SORBI-3005G215400
Zm00001d017210	2.53955e-07	0.100377	0.22	0.137	0.0143182	Phloem	SORBI-3004G214700
SORBI-3001G040200	2.58038e-07	0.390286	0.39	0.325	0.0145485	Phloem	SORBI-3001G040200
Zm00001d023294	2.58846e-07	0.18842	0.222	0.142	0.014594	Phloem	SORBI-3008G021800
SORBI-3004G084100	2.69533e-07	0.153591	0.333	0.228	0.0151965	Phloem	SORBI-3004G084100
Zm00001d022513	2.7118e-07	-0.171774	0.828	0.832	0.0152894	Phloem	SORBI-3002G406500
SORBI-3002G253900	2.72894e-07	-0.100598	0.057	0.144	0.015386	Phloem	SORBI-3002G253900
SORBI-3010G166500	2.9125e-07	0.197627	0.309	0.219	0.016421	Phloem	SORBI-3010G166500
Zm00001d022518	2.93431e-07	-0.362971	0.263	0.36	0.016544	Phloem	SORBI-3002G421600
Zm00001d030859	2.93837e-07	0.11639	0.337	0.236	0.0165668	Phloem	SORBI-3008G144800
Zm00001d037266	2.9984e-07	0.120826	0.288	0.188	0.0169053	Phloem	SORBI-3010G099900
Zm00001d047951	3.00498e-07	0.286311	0.35	0.253	0.0169424	Phloem	SORBI-3001G440200
Zm00001d019089	3.06182e-07	-0.265701	0.034	0.108	0.0172628	Phloem	SORBI-3002G068000
Zm00001d019645	3.08524e-07	0.138821	0.39	0.278	0.0173949	Phloem	SORBI-3002G131600
SORBI-3002G125700	3.13686e-07	-0.279771	0.284	0.399	0.0176859	Phloem	SORBI-3002G125700
Zm00001d031189	3.18642e-07	0.191089	0.292	0.203	0.0179654	Phloem	SORBI-3008G188000
SORBI-3003G121100	3.21261e-07	-0.368616	0.083	0.172	0.018113	Phloem	SORBI-3003G121100
SORBI-3004G088501	3.25775e-07	-0.189771	0.248	0.359	0.0183675	Phloem	SORBI-3004G088501
Zm00001d021752.1	3.26734e-07	0.453475	0.377	0.299	0.0184216	Phloem	Zm00001d021752.1
Zm00001d029768	3.39738e-07	0.10613	0.136	0.074	0.0191548	Phloem	SORBI-3001G312600
SORBI-3006G275800	3.44392e-07	-0.247976	0.28	0.382	0.0194172	Phloem	SORBI-3006G275800
SORBI-3003G340700	3.5535e-07	0.202841	0.468	0.374	0.020035	Phloem	SORBI-3003G340700
Zm00001d012728	3.60129e-07	0.139979	0.233	0.153	0.0203044	Phloem	SORBI-3003G299000
SORBI-3001G112600	3.70319e-07	-0.184949	0.765	0.792	0.020879	Phloem	SORBI-3001G112600
Zm00001d004413	3.71694e-07	-0.187495	0.434	0.563	0.0209565	Phloem	SORBI-3006G016900
Zm00001d015921	3.73087e-07	-0.34928	0.206	0.309	0.021035	Phloem	SORBI-3004G128600
Zm00001d024300	3.82424e-07	-0.214351	0.064	0.148	0.0215615	Phloem	SORBI-3007G075100
Zm00001d051929	3.84882e-07	-0.179542	0.386	0.529	0.0217	Phloem	SORBI-3004G342400
Zm00001d027685	4.23225e-07	-0.171585	0.074	0.157	0.0238619	Phloem	SORBI-3001G502400
SORBI-3001G077400	4.35716e-07	0.232731	0.337	0.246	0.0245661	Phloem	SORBI-3001G077400
Zm00001d039182	4.43724e-07	0.145653	0.347	0.253	0.0250176	Phloem	SORBI-3009G252800
Zm00001d034839	4.47702e-07	-0.127951	0.066	0.15	0.0252419	Phloem	SORBI-3001G013800
Zm00001d020930	4.55731e-07	0.260136	0.542	0.505	0.0256945	Phloem	SORBI-3002G246200
SORBI-3001G012600	4.77246e-07	-0.158679	0.087	0.182	0.0269076	Phloem	SORBI-3001G012600
Zm00001d037949	4.85107e-07	-0.15039	0.131	0.241	0.0273508	Phloem	SORBI-3009G109700
SORBI-3003G279200	4.90247e-07	0.213458	0.587	0.547	0.0276406	Phloem	SORBI-3003G279200
Zm00001d022130	4.93958e-07	0.298855	0.297	0.211	0.0278499	Phloem	SORBI-3002G373001
SORBI-3001G502900	4.95317e-07	-0.243812	0.689	0.712	0.0279265	Phloem	SORBI-3001G502900
Zm00001d015289	4.97685e-07	-0.122457	0.055	0.137	0.02806	Phloem	SORBI-3004G042100
Zm00001d033983	4.99071e-07	0.427014	0.617	0.59	0.0281381	Phloem	SORBI-3001G093900
Zm00001d021119.1	4.99786e-07	0.208769	0.292	0.207	0.0281785	Phloem	Zm00001d021119.1
Zm00001d018491	5.19502e-07	-0.145112	0.036	0.108	0.02929	Phloem	SORBI-3004G346400
SORBI-3010G173100	5.20428e-07	-0.140861	0.835	0.86	0.0293423	Phloem	SORBI-3010G173100
SORBI-3002G361001	5.23117e-07	-0.383082	0.153	0.237	0.0294939	Phloem	SORBI-3002G361001
SORBI-3004G203700	5.285e-07	-0.562497	0.129	0.213	0.0297974	Phloem	SORBI-3004G203700
SORBI-3008G157000	5.33434e-07	-0.245303	0.483	0.577	0.0300755	Phloem	SORBI-3008G157000
Zm00001d018914	5.43798e-07	-0.230382	0.542	0.624	0.0306599	Phloem	SORBI-3002G049300
Zm00001d039827	5.43903e-07	-0.200154	0.087	0.174	0.0306658	Phloem	SORBI-3003G068000
SORBI-3010G071000	5.58833e-07	0.102911	0.286	0.191	0.0315076	Phloem	SORBI-3010G071000
Zm00001d017966	5.61408e-07	-0.319813	0.381	0.453	0.0316528	Phloem	SORBI-3004G246200
Zm00001d020973	5.62657e-07	0.123599	0.309	0.211	0.0317232	Phloem	SORBI-3002G251900
SORBI-3008G132400	5.77398e-07	0.146866	0.35	0.255	0.0325543	Phloem	SORBI-3008G132400
SORBI-3002G308300	5.90478e-07	0.218214	0.619	0.587	0.0332918	Phloem	SORBI-3002G308300
SORBI-3003G393900	6.02691e-07	0.135072	0.894	0.889	0.0339803	Phloem	SORBI-3003G393900
SORBI-3010G005300	6.18058e-07	-0.176023	0.917	0.882	0.0348467	Phloem	SORBI-3010G005300
Zm00001d035542	6.18118e-07	0.597532	0.456	0.413	0.0348501	Phloem	SORBI-3009G023200
SORBI-3004G256600	6.24402e-07	-0.259724	0.273	0.372	0.0352044	Phloem	SORBI-3004G256600
SORBI-3004G282100	6.24501e-07	0.116293	0.182	0.108	0.03521	Phloem	SORBI-3004G282100
SORBI-3002G161700	6.26511e-07	-0.153098	0.106	0.203	0.0353233	Phloem	SORBI-3002G161700
Zm00001d016553	6.39708e-07	-0.174623	0.117	0.211	0.0360674	Phloem	SORBI-3004G153400
SORBI-3001G482700	6.42585e-07	0.18332	0.335	0.237	0.0362296	Phloem	SORBI-3001G482700
SORBI-3005G099000	6.49168e-07	-0.436798	0.129	0.22	0.0366007	Phloem	SORBI-3005G099000
SORBI-3006G154500	6.51047e-07	0.501395	0.415	0.353	0.0367067	Phloem	SORBI-3006G154500
SORBI-3010G084400	6.54311e-07	0.259765	0.256	0.174	0.0368907	Phloem	SORBI-3010G084400
Zm00001d007831	6.62926e-07	-0.234028	0.042	0.115	0.0373764	Phloem	SORBI-3002G050400
SORBI-3005G154400	6.79146e-07	-0.427787	0.144	0.244	0.0382909	Phloem	SORBI-3005G154400
Zm00001d044329	6.88836e-07	-0.125161	0.066	0.147	0.0388372	Phloem	SORBI-3003G202500
SORBI-3005G222500	6.96158e-07	-0.345508	0.441	0.524	0.0392501	Phloem	SORBI-3005G222500
SORBI-3010G178800	6.98575e-07	-0.222521	0.178	0.28	0.0393864	Phloem	SORBI-3010G178800
Zm00001d028482	7.01584e-07	0.118219	0.208	0.132	0.039556	Phloem	SORBI-3001G433900
Zm00001d037966	7.08417e-07	0.120815	0.261	0.174	0.0399412	Phloem	SORBI-3009G108600
Zm00001d034501	7.11161e-07	-0.46526	0.208	0.294	0.040096	Phloem	SORBI-3001G051600
Zm00001d034218	7.26521e-07	0.301565	0.644	0.619	0.040962	Phloem	SORBI-3001G074700
SORBI-3008G132300	7.44461e-07	-0.127543	0.091	0.184	0.0419735	Phloem	SORBI-3008G132300
SORBI-3001G034700	7.64386e-07	0.287922	0.703	0.732	0.0430968	Phloem	SORBI-3001G034700
Zm00001d029668	7.66055e-07	0.210742	0.324	0.235	0.043191	Phloem	SORBI-3001G321800
Zm00001d027342	7.69321e-07	0.167001	0.644	0.582	0.0433751	Phloem	SORBI-3001G533500
Zm00001d035629	7.77029e-07	0.300212	0.492	0.424	0.0438096	Phloem	SORBI-3009G015700
SORBI-3006G221300	7.81939e-07	-0.18985	0.159	0.271	0.0440865	Phloem	SORBI-3006G221300
SORBI-3001G422100	8.04576e-07	-0.293444	0.11	0.195	0.0453628	Phloem	SORBI-3001G422100
Zm00001d032536	8.2595e-07	-0.328142	0.602	0.675	0.0465679	Phloem	SORBI-3001G203200
SORBI-3002G348100	8.40286e-07	-0.124672	0.131	0.237	0.0473761	Phloem	SORBI-3002G348100
SORBI-3009G230400	8.40992e-07	-0.162004	0.061	0.143	0.047416	Phloem	SORBI-3009G230400
Zm00001d042724	8.41951e-07	0.105539	0.377	0.273	0.04747	Phloem	SORBI-3003G368000
SORBI-3001G035100	8.50171e-07	0.32971	0.362	0.278	0.0479335	Phloem	SORBI-3001G035100
SORBI-3003G328800	8.50726e-07	-0.180739	0.64	0.733	0.0479648	Phloem	SORBI-3003G328800
SORBI-3003G218600	8.53125e-07	0.355913	0.436	0.359	0.0481	Phloem	SORBI-3003G218600
SORBI-3005G133900	8.61506e-07	0.120069	0.333	0.238	0.0485726	Phloem	SORBI-3005G133900
SORBI-3003G031900	8.72263e-07	-0.149521	0.07	0.152	0.0491791	Phloem	SORBI-3003G031900
Zm00001d002128	8.85546e-07	-0.136658	0.068	0.149	0.049928	Phloem	SORBI-3006G235500
SORBI-3010G262433	8.88393e-07	0.149017	0.428	0.325	0.0500885	Phloem	SORBI-3010G262433
SORBI-3001G513600	8.90911e-07	-0.196393	0.383	0.508	0.0502304	Phloem	SORBI-3001G513600
SORBI-3001G107100	9.15424e-07	-0.125273	0.744	0.866	0.0516125	Phloem	SORBI-3001G107100
SORBI-3005G101600	9.31829e-07	0.424107	0.246	0.166	0.0525374	Phloem	SORBI-3005G101600
Zm00001d004009	9.35498e-07	-0.168935	0.811	0.797	0.0527443	Phloem	SORBI-3006G047400
SORBI-3010G182100	9.39842e-07	-0.158963	0.871	0.843	0.0529892	Phloem	SORBI-3010G182100
SORBI-3001G443200	9.45524e-07	-0.119984	0.265	0.387	0.0533096	Phloem	SORBI-3001G443200
Zm00001d027362	9.46814e-07	0.148688	0.314	0.222	0.0533823	Phloem	SORBI-3001G531900
SORBI-3004G004800	9.98342e-07	-0.201834	0.1	0.194	0.0562875	Phloem	SORBI-3004G004800
Zm00001d049059	1.00544e-06	-0.188872	0.085	0.174	0.0566875	Phloem	SORBI-3005G103300
SORBI-3003G129900	1.00746e-06	0.188486	0.502	0.423	0.0568017	Phloem	SORBI-3003G129900
Zm00001d008255	1.00776e-06	-0.135193	0.051	0.127	0.0568186	Phloem	SORBI-3003G128700
SORBI-3004G244500	1.02655e-06	-0.122498	0.256	0.385	0.057878	Phloem	SORBI-3004G244500
SORBI-3001G148900	1.02807e-06	-0.261668	0.335	0.422	0.0579635	Phloem	SORBI-3001G148900
SORBI-3009G086200	1.0423e-06	0.113723	0.216	0.139	0.0587657	Phloem	SORBI-3009G086200
SORBI-3003G399600	1.05139e-06	-0.399574	0.362	0.468	0.0592783	Phloem	SORBI-3003G399600
Zm00001d032704	1.05817e-06	-0.184396	0.051	0.126	0.0596605	Phloem	SORBI-3001G219900
SORBI-3003G134800	1.06547e-06	-0.164026	0.35	0.477	0.0600723	Phloem	SORBI-3003G134800
SORBI-3010G001000	1.07937e-06	-0.195949	0.1	0.192	0.0608558	Phloem	SORBI-3010G001000
Zm00001d014667	1.10298e-06	0.109055	0.32	0.22	0.0621869	Phloem	SORBI-3010G250600
Zm00001d017620	1.12056e-06	-0.2183	0.112	0.195	0.0631785	Phloem	SORBI-3004G280200
SORBI-3004G247200	1.14796e-06	0.276208	0.591	0.573	0.0647234	Phloem	SORBI-3004G247200
Zm00001d042104	1.18576e-06	-0.218989	0.034	0.101	0.0668544	Phloem	SORBI-3003G426100
SORBI-3001G161601	1.22984e-06	0.139214	0.297	0.202	0.0693398	Phloem	SORBI-3001G161601
Zm00001d017995	1.24936e-06	-0.251684	0.068	0.147	0.0704401	Phloem	SORBI-3004G242700
Zm00001d016276	1.25532e-06	-0.152923	0.79	0.817	0.0707759	Phloem	SORBI-3004G099500
SORBI-3001G041100	1.27269e-06	0.196115	0.398	0.303	0.0717553	Phloem	SORBI-3001G041100
Zm00001d011095	1.28176e-06	-0.21646	0.227	0.324	0.072267	Phloem	SORBI-3009G003800
SORBI-3004G202100	1.28312e-06	0.204873	0.434	0.356	0.0723439	Phloem	SORBI-3004G202100
SORBI-3002G070600	1.29135e-06	-0.202645	0.367	0.482	0.0728074	Phloem	SORBI-3002G070600
Zm00001d024770	1.29253e-06	-0.105325	0.044	0.116	0.0728739	Phloem	SORBI-3009G035100
Zm00001d034771.1	1.30933e-06	-0.202956	0.449	0.559	0.0738216	Phloem	Zm00001d034771.1
Zm00001d037590	1.3308e-06	-0.212544	0.46	0.539	0.075032	Phloem	SORBI-3009G051600
Zm00001d023376	1.3333e-06	-0.172492	0.422	0.536	0.0751727	Phloem	SORBI-3008G033200
SORBI-3001G284400	1.40118e-06	0.11725	0.307	0.214	0.0790002	Phloem	SORBI-3001G284400
Zm00001d022510	1.41856e-06	-0.127469	0.117	0.218	0.0799799	Phloem	SORBI-3002G407000
SORBI-3007G211700	1.42934e-06	-0.144232	0.898	0.895	0.0805875	Phloem	SORBI-3007G211700
Zm00001d017095	1.49769e-06	-0.150555	0.066	0.146	0.0844412	Phloem	SORBI-3004G202400
Zm00001d045043.1	1.55923e-06	-0.10761	0.055	0.131	0.0879111	Phloem	Zm00001d045043.1
Zm00001d031300	1.57697e-06	-0.161801	0.042	0.111	0.0889114	Phloem	SORBI-3007G219900
SORBI-3009G119501	1.59383e-06	-0.15842	0.362	0.48	0.0898617	Phloem	SORBI-3009G119501
Zm00001d023664	1.59906e-06	0.246449	0.225	0.145	0.0901564	Phloem	SORBI-3008G095000
SORBI-3004G045300	1.61062e-06	-0.192519	0.307	0.415	0.0908083	Phloem	SORBI-3004G045300
SORBI-3007G173000	1.64738e-06	-0.138508	0.169	0.274	0.0928809	Phloem	SORBI-3007G173000
Zm00001d015421	1.66089e-06	0.171331	0.356	0.261	0.0936425	Phloem	SORBI-3004G059900
Zm00001d036642	1.71486e-06	-0.14284	0.07	0.151	0.0966856	Phloem	SORBI-3010G221600
SORBI-3003G087100	1.74578e-06	0.174333	0.252	0.172	0.0984286	Phloem	SORBI-3003G087100
SORBI-3009G224500	1.7628e-06	-0.113827	0.038	0.106	0.0993884	Phloem	SORBI-3009G224500
SORBI-3006G027200	1.78033e-06	0.171586	0.275	0.191	0.100377	Phloem	SORBI-3006G027200
SORBI-3001G134500	1.79479e-06	0.285347	0.375	0.292	0.101192	Phloem	SORBI-3001G134500
Zm00001d042350	1.80556e-06	0.218315	0.356	0.263	0.101799	Phloem	SORBI-3003G403400
Zm00001d052885	1.84077e-06	-0.150457	0.797	0.797	0.103785	Phloem	SORBI-3007G212600
SORBI-3006G167800	1.85325e-06	0.293969	0.343	0.268	0.104488	Phloem	SORBI-3006G167800
SORBI-3003G234000	1.8629e-06	0.24076	0.358	0.275	0.105032	Phloem	SORBI-3003G234000
Zm00001d048174	1.88744e-06	-0.180033	0.25	0.356	0.106416	Phloem	SORBI-3001G468600
SORBI-3010G251600	1.93521e-06	-0.171125	0.867	0.836	0.109109	Phloem	SORBI-3010G251600
SORBI-3004G262200	1.95493e-06	0.155478	0.411	0.317	0.110221	Phloem	SORBI-3004G262200
SORBI-3006G154800	1.98293e-06	0.168187	0.271	0.188	0.111799	Phloem	SORBI-3006G154800
Zm00001d003277	2.00025e-06	-0.524122	0.229	0.299	0.112776	Phloem	SORBI-3006G122400
Zm00001d053196	2.0515e-06	-0.165787	0.18	0.28	0.115666	Phloem	SORBI-3007G180100
Zm00001d021948	2.06519e-06	0.107608	0.324	0.227	0.116437	Phloem	SORBI-3002G355100
SORBI-3007G171500	2.07844e-06	0.179005	0.648	0.628	0.117185	Phloem	SORBI-3007G171500
Zm00001d037586	2.14632e-06	-0.258432	0.216	0.307	0.121012	Phloem	SORBI-3009G051700
Zm00001d037018	2.18447e-06	0.155822	0.4	0.304	0.123163	Phloem	SORBI-3010G159100
Zm00001d042598	2.2235e-06	-0.205593	0.14	0.231	0.125363	Phloem	SORBI-3003G380500
SORBI-3009G078900	2.22838e-06	-0.116197	0.148	0.256	0.125639	Phloem	SORBI-3009G078900
SORBI-3007G178600	2.23487e-06	-0.133963	0.907	0.874	0.126004	Phloem	SORBI-3007G178600
SORBI-3004G347400	2.23793e-06	0.125385	0.199	0.129	0.126177	Phloem	SORBI-3004G347400
SORBI-3010G182300	2.25767e-06	-0.198232	0.786	0.793	0.12729	Phloem	SORBI-3010G182300
SORBI-3009G198700	2.25837e-06	-0.1274	0.229	0.337	0.127329	Phloem	SORBI-3009G198700
Zm00001d011081	2.27245e-06	0.216975	0.799	0.775	0.128123	Phloem	SORBI-3009G008900
SORBI-3010G212500	2.28433e-06	-0.240154	0.087	0.174	0.128793	Phloem	SORBI-3010G212500
Zm00001d039106	2.29419e-06	-0.162516	0.61	0.706	0.129349	Phloem	SORBI-3009G242400
Zm00001d010631	2.30146e-06	-0.171165	0.803	0.792	0.129758	Phloem	SORBI-3009G177700
SORBI-3006G061300	2.3492e-06	-0.11055	0.04	0.109	0.13245	Phloem	SORBI-3006G061300
Zm00001d020442	2.36295e-06	0.107969	0.237	0.158	0.133226	Phloem	SORBI-3002G199650
SORBI-3006G211200	2.37672e-06	-0.140392	0.324	0.441	0.134002	Phloem	SORBI-3006G211200
SORBI-3004G347500	2.42629e-06	0.216768	0.297	0.216	0.136797	Phloem	SORBI-3004G347500
Zm00001d045026	2.43264e-06	-0.168603	0.04	0.109	0.137155	Phloem	SORBI-3010G073600
SORBI-3004G020700	2.43673e-06	-0.144517	0.178	0.29	0.137385	Phloem	SORBI-3004G020700
SORBI-3003G005800	2.49325e-06	-0.251813	0.059	0.132	0.140572	Phloem	SORBI-3003G005800
Zm00001d021506	2.55987e-06	-0.216486	0.136	0.221	0.144328	Phloem	SORBI-3002G304000
Zm00001d042596	2.57604e-06	0.134571	0.244	0.164	0.14524	Phloem	SORBI-3003G380600
SORBI-3006G131400	2.60998e-06	0.152693	0.369	0.274	0.147154	Phloem	SORBI-3006G131400
Zm00001d018406	2.61325e-06	-0.148137	0.07	0.149	0.147338	Phloem	SORBI-3004G334000
SORBI-3001G025500	2.63328e-06	-0.109139	0.049	0.122	0.148467	Phloem	SORBI-3001G025500
Zm00001d015973	2.6907e-06	0.178481	0.415	0.314	0.151704	Phloem	SORBI-3004G128000
SORBI-3009G140800	2.70245e-06	0.168051	0.392	0.297	0.152367	Phloem	SORBI-3009G140800
SORBI-3004G086000	2.79311e-06	0.21237	0.472	0.381	0.157478	Phloem	SORBI-3004G086000
Zm00001d018393	2.79934e-06	0.133541	0.271	0.186	0.15783	Phloem	SORBI-3004G332500
Zm00001d022569	2.80007e-06	0.118517	0.157	0.096	0.157871	Phloem	SORBI-3002G427900
Zm00001d032458	2.8164e-06	0.324335	0.449	0.386	0.158792	Phloem	SORBI-3001G195100
Zm00001d026163	2.92135e-06	-0.546992	0.542	0.624	0.164709	Phloem	SORBI-3006G172500
SORBI-3001G482600	2.95112e-06	0.381156	0.405	0.333	0.166387	Phloem	SORBI-3001G482600
SORBI-3003G322300	2.95849e-06	0.186654	0.566	0.477	0.166803	Phloem	SORBI-3003G322300
SORBI-3003G199500	2.96985e-06	0.123819	0.311	0.223	0.167443	Phloem	SORBI-3003G199500
Zm00001d006357	2.98086e-06	-0.146932	0.11	0.202	0.168064	Phloem	SORBI-3002G299700
SORBI-3005G058800	3.00081e-06	0.23261	0.47	0.388	0.169189	Phloem	SORBI-3005G058800
Zm00001d037246	3.03503e-06	0.19817	0.47	0.397	0.171118	Phloem	SORBI-3010G095700
SORBI-3005G091700	3.04307e-06	-0.136742	0.299	0.438	0.171572	Phloem	SORBI-3005G091700
SORBI-3006G172601	3.04667e-06	-1.43358	0.826	0.838	0.171774	Phloem	SORBI-3006G172601
SORBI-3009G114800	3.07052e-06	0.10907	0.191	0.121	0.173119	Phloem	SORBI-3009G114800
SORBI-3007G197800	3.11114e-06	-0.160507	0.888	0.852	0.175409	Phloem	SORBI-3007G197800
SORBI-3006G052500	3.1424e-06	0.187923	0.369	0.279	0.177172	Phloem	SORBI-3006G052500
Zm00001d009714	3.23945e-06	-0.100187	0.044	0.113	0.182643	Phloem	SORBI-3009G249900
Zm00001d016588	3.24379e-06	-0.438963	0.46	0.513	0.182888	Phloem	SORBI-3004G157300
Zm00001d014816.1	3.28432e-06	-0.183115	0.047	0.114	0.185173	Phloem	Zm00001d014816.1
SORBI-3008G059900	3.33535e-06	-0.206223	0.184	0.281	0.18805	Phloem	SORBI-3008G059900
SORBI-3001G081600	3.40679e-06	0.156689	0.339	0.242	0.192078	Phloem	SORBI-3001G081600
SORBI-3002G043400	3.43846e-06	0.352474	0.585	0.535	0.193864	Phloem	SORBI-3002G043400
SORBI-3002G388900	3.45355e-06	0.357995	0.379	0.308	0.194714	Phloem	SORBI-3002G388900
SORBI-3003G135400	3.46412e-06	-0.183921	0.439	0.569	0.195311	Phloem	SORBI-3003G135400
Zm00001d010055	3.50708e-06	0.124148	0.35	0.258	0.197733	Phloem	SORBI-3009G160200
Zm00001d019186	3.61732e-06	0.186086	0.561	0.507	0.203948	Phloem	SORBI-3002G078300
Zm00001d048969	3.62272e-06	0.127	0.216	0.141	0.204252	Phloem	SORBI-3005G090800
Zm00001d016864	3.62983e-06	0.213009	0.555	0.518	0.204653	Phloem	SORBI-3004G183200
Zm00001d010220	3.66127e-06	-0.167298	0.508	0.601	0.206426	Phloem	SORBI-3009G144300
Zm00001d035802	3.66633e-06	-0.138624	0.11	0.199	0.206711	Phloem	SORBI-3009G046100
Zm00001d024644	3.66924e-06	0.106548	0.186	0.119	0.206876	Phloem	SORBI-3007G037100
SORBI-3002G343500	3.7033e-06	0.123011	0.341	0.248	0.208796	Phloem	SORBI-3002G343500
Zm00001d014925	3.70577e-06	0.156859	0.212	0.14	0.208935	Phloem	SORBI-3004G002400
Zm00001d018621	3.76683e-06	0.363901	0.398	0.326	0.212378	Phloem	SORBI-3002G003800
SORBI-3002G419700	3.78404e-06	0.168018	0.297	0.21	0.213348	Phloem	SORBI-3002G419700
SORBI-3003G186500	3.79936e-06	0.408628	0.377	0.322	0.214212	Phloem	SORBI-3003G186500
SORBI-3003G170300	3.84152e-06	0.175233	0.633	0.583	0.216589	Phloem	SORBI-3003G170300
Zm00001d032409	3.85313e-06	-0.26681	0.064	0.135	0.217243	Phloem	SORBI-3001G190200
SORBI-3007G077300	3.91153e-06	0.176841	0.375	0.276	0.220536	Phloem	SORBI-3007G077300
Zm00001d021873	3.91442e-06	-0.174479	0.104	0.19	0.220699	Phloem	SORBI-3002G347700
SORBI-3004G093600	3.94495e-06	0.184437	0.553	0.491	0.22242	Phloem	SORBI-3004G093600
Zm00001d024518	4.15355e-06	0.17299	0.669	0.613	0.234181	Phloem	SORBI-3007G052700
Zm00001d011902	4.19559e-06	-0.166373	0.066	0.141	0.236552	Phloem	SORBI-3003G419700
SORBI-3010G032600	4.28608e-06	0.130926	0.35	0.261	0.241653	Phloem	SORBI-3010G032600
SORBI-3006G095600	4.33058e-06	0.156637	0.343	0.252	0.244163	Phloem	SORBI-3006G095600
SORBI-3001G016500	4.35778e-06	-0.154727	0.367	0.487	0.245696	Phloem	SORBI-3001G016500
Zm00001d038804	4.52438e-06	-0.163709	0.148	0.247	0.255089	Phloem	SORBI-3009G201700
Zm00001d043613	4.54804e-06	0.135611	0.318	0.223	0.256423	Phloem	SORBI-3003G278500
Zm00001d005698	4.67357e-06	0.218022	0.35	0.257	0.263501	Phloem	SORBI-3002G192000
SORBI-3003G373100	4.67968e-06	-0.339408	0.337	0.418	0.263845	Phloem	SORBI-3003G373100
SORBI-3010G275800	4.68266e-06	-0.165331	0.218	0.334	0.264013	Phloem	SORBI-3010G275800
Zm00001d012640.1	4.69739e-06	0.11205	0.189	0.121	0.264844	Phloem	Zm00001d012640.1
SORBI-3005G038300	4.8134e-06	-0.106083	0.038	0.103	0.271384	Phloem	SORBI-3005G038300
SORBI-3001G247200	4.81699e-06	0.126298	0.222	0.147	0.271587	Phloem	SORBI-3001G247200
Zm00001d039297	4.83855e-06	-0.177268	0.102	0.19	0.272802	Phloem	SORBI-3003G007600
Zm00001d051138	4.94831e-06	0.127446	0.311	0.222	0.278991	Phloem	SORBI-3004G219300
SORBI-3005G228900	5.01181e-06	0.193449	0.451	0.377	0.282571	Phloem	SORBI-3005G228900
SORBI-3002G045100	5.01439e-06	-0.167061	0.191	0.295	0.282716	Phloem	SORBI-3002G045100
SORBI-3002G273900	5.0448e-06	0.12771	0.4	0.31	0.284431	Phloem	SORBI-3002G273900
SORBI-3005G030100	5.06883e-06	-0.130248	0.136	0.229	0.285786	Phloem	SORBI-3005G030100
SORBI-3006G094600	5.19987e-06	0.100098	0.337	0.245	0.293174	Phloem	SORBI-3006G094600
SORBI-3001G112900	5.31355e-06	0.125296	0.231	0.159	0.299583	Phloem	SORBI-3001G112900
SORBI-3001G456100	5.35586e-06	-0.208568	0.072	0.146	0.301969	Phloem	SORBI-3001G456100
Zm00001d010067	5.38242e-06	0.133007	0.307	0.221	0.303466	Phloem	SORBI-3009G156300
SORBI-3006G000100	5.53331e-06	-0.200032	0.087	0.169	0.311973	Phloem	SORBI-3006G000100
Zm00001d053452	5.58713e-06	0.129271	0.237	0.16	0.315008	Phloem	SORBI-3004G107100
Zm00001d015895	5.64549e-06	0.140536	0.314	0.225	0.318298	Phloem	SORBI-3004G137900
SORBI-3009G015000	5.65784e-06	0.1686	0.653	0.61	0.318995	Phloem	SORBI-3009G015000
Zm00001d014192	5.67934e-06	-0.129258	0.123	0.211	0.320207	Phloem	SORBI-3001G252000
Zm00001d020780	5.72831e-06	-0.221905	0.15	0.243	0.322968	Phloem	SORBI-3002G231600
Zm00001d004839	5.73467e-06	-0.131865	0.614	0.749	0.323327	Phloem	SORBI-3005G050500
Zm00001d035945	5.73941e-06	0.17322	0.142	0.085	0.323594	Phloem	SORBI-3010G011900
SORBI-3009G198500	5.79548e-06	0.170213	0.606	0.564	0.326755	Phloem	SORBI-3009G198500
SORBI-3003G127100	5.82669e-06	-0.137963	0.271	0.394	0.328515	Phloem	SORBI-3003G127100
Zm00001d015375	5.84435e-06	-0.175774	0.739	0.743	0.32951	Phloem	SORBI-3004G055100
Zm00001d011827	5.88916e-06	-0.117478	0.038	0.103	0.332037	Phloem	SORBI-3003G433750
SORBI-3001G118300	5.90841e-06	0.159867	0.269	0.196	0.333122	Phloem	SORBI-3001G118300
Zm00001d030080	5.92921e-06	0.195889	0.623	0.606	0.334295	Phloem	SORBI-3001G286200
SORBI-3002G277300	5.99216e-06	0.12217	0.311	0.227	0.337844	Phloem	SORBI-3002G277300
Zm00001d029142	6.01543e-06	-0.130722	0.055	0.125	0.339156	Phloem	SORBI-3001G373000
SORBI-3004G030000	6.01841e-06	0.17311	0.672	0.673	0.339324	Phloem	SORBI-3004G030000
SORBI-3001G406800	6.10689e-06	-0.841864	0.218	0.288	0.344313	Phloem	SORBI-3001G406800
SORBI-3007G144600	6.19842e-06	0.101	0.165	0.103	0.349473	Phloem	SORBI-3007G144600
SORBI-3004G244000	6.25124e-06	0.193066	0.572	0.518	0.352451	Phloem	SORBI-3004G244000
Zm00001d034420	6.26326e-06	-0.292234	0.345	0.422	0.353129	Phloem	SORBI-3001G059100
SORBI-3006G012800	6.48576e-06	0.101548	0.119	0.067	0.365674	Phloem	SORBI-3006G012800
SORBI-3007G019000	6.63751e-06	-0.180655	0.716	0.718	0.374229	Phloem	SORBI-3007G019000
SORBI-3010G088600	6.64151e-06	0.107865	0.377	0.281	0.374455	Phloem	SORBI-3010G088600
SORBI-3005G164700	6.68721e-06	-0.137349	0.244	0.365	0.377032	Phloem	SORBI-3005G164700
SORBI-3003G286200	6.72428e-06	0.253413	0.555	0.53	0.379122	Phloem	SORBI-3003G286200
Zm00001d030893	6.78751e-06	-0.158488	0.22	0.332	0.382686	Phloem	SORBI-3008G147300
Zm00001d034884	7.20236e-06	0.115143	0.148	0.089	0.406076	Phloem	SORBI-3001G007700
Zm00001d044332	7.23548e-06	0.14162	0.318	0.231	0.407944	Phloem	SORBI-3003G202800
Zm00001d023298	7.40222e-06	-0.167725	0.106	0.188	0.417344	Phloem	SORBI-3008G021900
SORBI-3003G257200	7.4045e-06	-0.178401	0.186	0.289	0.417473	Phloem	SORBI-3003G257200
SORBI-3004G309500	7.45227e-06	0.136296	0.32	0.235	0.420166	Phloem	SORBI-3004G309500
SORBI-3001G412700	7.72518e-06	-0.254035	0.068	0.137	0.435553	Phloem	SORBI-3001G412700
Zm00001d048957	7.7305e-06	-0.140738	0.04	0.104	0.435853	Phloem	SORBI-3005G092900
Zm00001d042966	7.92551e-06	-0.143586	0.822	0.805	0.446848	Phloem	SORBI-3003G346600
SORBI-3008G021100	7.95041e-06	-0.127456	0.619	0.734	0.448252	Phloem	SORBI-3008G021100
SORBI-3010G011200	7.95114e-06	-0.222861	0.165	0.259	0.448293	Phloem	SORBI-3010G011200
SORBI-3001G533300	8.09394e-06	0.151389	0.434	0.343	0.456344	Phloem	SORBI-3001G533300
SORBI-3004G356800	8.17571e-06	-0.140516	0.193	0.3	0.460955	Phloem	SORBI-3004G356800
Zm00001d031473	8.21015e-06	0.10001	0.229	0.151	0.462896	Phloem	SORBI-3007G208300
Zm00001d035519	8.30274e-06	0.13207	0.341	0.257	0.468117	Phloem	SORBI-3009G024200
Zm00001d012322	8.34025e-06	-0.19491	0.049	0.113	0.470231	Phloem	SORBI-3003G360900
SORBI-3002G054000	8.46306e-06	-0.181525	0.706	0.776	0.477156	Phloem	SORBI-3002G054000
Zm00001d023582	8.50351e-06	0.115639	0.316	0.225	0.479437	Phloem	SORBI-3008G057900
SORBI-3010G083500	8.50948e-06	0.286339	0.443	0.391	0.479773	Phloem	SORBI-3010G083500
Zm00001d044008	8.72454e-06	-0.291926	0.138	0.226	0.491898	Phloem	SORBI-3003G242900
Zm00001d044744	8.76581e-06	0.108411	0.248	0.171	0.494225	Phloem	SORBI-3010G101900
SORBI-3004G074900	8.85324e-06	-0.153868	0.072	0.144	0.499154	Phloem	SORBI-3004G074900
Zm00001d046468	8.95856e-06	-0.161771	0.258	0.352	0.505093	Phloem	SORBI-3010G178600
SORBI-3001G389300	8.96113e-06	-0.128454	0.042	0.107	0.505237	Phloem	SORBI-3001G389300
SORBI-3001G085400	9.02524e-06	-0.133454	0.917	0.901	0.508852	Phloem	SORBI-3001G085400
Zm00001d042726	9.11171e-06	0.108053	0.288	0.202	0.513727	Phloem	SORBI-3003G367800
SORBI-3007G214700	9.21303e-06	0.184408	0.398	0.31	0.51944	Phloem	SORBI-3007G214700
Zm00001d026119	9.30161e-06	0.103326	0.212	0.142	0.524434	Phloem	SORBI-3006G180600
SORBI-3004G031800	9.34112e-06	0.136165	0.358	0.27	0.526662	Phloem	SORBI-3004G031800
SORBI-3005G063400	9.4531e-06	-0.115253	0.081	0.154	0.532975	Phloem	SORBI-3005G063400
Zm00001d032114	9.52611e-06	-0.171542	0.178	0.264	0.537091	Phloem	SORBI-3007G145000
SORBI-3001G304201	9.56099e-06	-0.638802	0.163	0.245	0.539058	Phloem	SORBI-3001G304201
SORBI-3001G045000	9.82915e-06	0.156931	0.256	0.181	0.554177	Phloem	SORBI-3001G045000
SORBI-3006G216600	9.97091e-06	-0.136111	0.869	0.859	0.56217	Phloem	SORBI-3006G216600
SORBI-3008G127933	1.0128e-05	-0.280362	0.169	0.261	0.571028	Phloem	SORBI-3008G127933
Zm00001d045564	1.02714e-05	0.145383	0.282	0.202	0.57911	Phloem	SORBI-3010G007300
Zm00001d038658	1.05586e-05	0.177439	0.578	0.54	0.595302	Phloem	SORBI-3009G191400
SORBI-3003G387900	1.05614e-05	-0.134986	0.926	0.907	0.595463	Phloem	SORBI-3003G387900
SORBI-3001G536100	1.05821e-05	0.102668	0.239	0.165	0.596627	Phloem	SORBI-3001G536100
SORBI-3010G057100	1.06524e-05	-0.146498	0.797	0.808	0.600591	Phloem	SORBI-3010G057100
SORBI-3003G148600	1.06574e-05	-0.160826	0.142	0.23	0.600875	Phloem	SORBI-3003G148600
Zm00001d042179	1.0849e-05	-0.202522	0.059	0.128	0.611677	Phloem	SORBI-3003G419300
SORBI-3003G382600	1.08846e-05	0.187885	0.288	0.207	0.613687	Phloem	SORBI-3003G382600
SORBI-3002G405600	1.09259e-05	0.242607	0.413	0.337	0.616013	Phloem	SORBI-3002G405600
Zm00001d001832	1.11992e-05	0.126305	0.292	0.209	0.631421	Phloem	SORBI-3006G267000
SORBI-3007G095400	1.12863e-05	0.163751	0.443	0.354	0.63633	Phloem	SORBI-3007G095400
Zm00001d025551	1.15154e-05	-0.151963	0.504	0.596	0.649248	Phloem	SORBI-3006G098500
SORBI-3006G002700	1.16765e-05	-0.18721	0.337	0.421	0.658332	Phloem	SORBI-3006G002700
SORBI-3001G362001	1.16808e-05	-0.190196	0.074	0.143	0.658574	Phloem	SORBI-3001G362001
Zm00001d003603	1.18753e-05	0.139802	0.189	0.125	0.669541	Phloem	SORBI-3006G089300
SORBI-3004G150200	1.19241e-05	0.108911	0.314	0.226	0.672294	Phloem	SORBI-3004G150200
Zm00001d006321	1.19532e-05	-0.145521	0.371	0.5	0.673935	Phloem	SORBI-3002G293400
Zm00001d045432	1.19844e-05	0.125646	0.163	0.102	0.675694	Phloem	SORBI-3010G026500
Zm00001d013282.1	1.20518e-05	-0.145265	0.892	0.865	0.679495	Phloem	Zm00001d013282.1
SORBI-3005G159600	1.22465e-05	-0.191518	0.297	0.38	0.690469	Phloem	SORBI-3005G159600
Zm00001d027291.2	1.22547e-05	-0.178864	0.089	0.167	0.690932	Phloem	Zm00001d027291.2
SORBI-3002G401600	1.24579e-05	-0.15486	0.064	0.129	0.702386	Phloem	SORBI-3002G401600
Zm00001d045520	1.25112e-05	0.197688	0.564	0.524	0.705394	Phloem	SORBI-3010G015200
Zm00001d031431	1.27904e-05	0.216228	0.508	0.46	0.721136	Phloem	SORBI-3007G211500
SORBI-3004G045400	1.28164e-05	-0.134354	0.881	0.861	0.722603	Phloem	SORBI-3004G045400
SORBI-3001G374700	1.2996e-05	-0.135	0.869	0.853	0.732729	Phloem	SORBI-3001G374700
SORBI-3004G115350	1.31198e-05	0.123371	0.388	0.299	0.739705	Phloem	SORBI-3004G115350
Zm00001d017943	1.3123e-05	-0.200596	0.076	0.144	0.739888	Phloem	SORBI-3004G249000
SORBI-3010G230700	1.32107e-05	-0.127902	0.873	0.86	0.744833	Phloem	SORBI-3010G230700
SORBI-3001G125800	1.32316e-05	-0.567774	0.339	0.384	0.746009	Phloem	SORBI-3001G125800
Zm00001d016599	1.34177e-05	0.112041	0.112	0.062	0.756506	Phloem	SORBI-3004G158000
Zm00001d001789	1.37821e-05	-0.193359	0.178	0.262	0.777047	Phloem	SORBI-3006G271500
SORBI-3002G255300	1.39267e-05	-0.154618	0.483	0.59	0.785201	Phloem	SORBI-3002G255300
Zm00001d039735	1.41292e-05	-0.161012	0.057	0.123	0.79662	Phloem	SORBI-3003G057600
SORBI-3010G090500	1.42003e-05	-0.367306	0.347	0.422	0.800626	Phloem	SORBI-3010G090500
Zm00001d016274	1.42749e-05	-0.114159	0.161	0.259	0.804834	Phloem	SORBI-3004G099300
SORBI-3007G045500	1.43294e-05	-0.123437	0.066	0.134	0.807906	Phloem	SORBI-3007G045500
SORBI-3003G278700	1.43571e-05	-0.204972	0.04	0.102	0.80947	Phloem	SORBI-3003G278700
SORBI-3003G376100	1.44965e-05	0.139344	0.311	0.23	0.817329	Phloem	SORBI-3003G376100
Zm00001d052458	1.46726e-05	0.14653	0.392	0.308	0.827253	Phloem	SORBI-3005G028700
Zm00001d034773	1.47101e-05	-0.174244	0.479	0.591	0.829372	Phloem	SORBI-3001G021300
SORBI-3002G412800	1.48809e-05	-0.17746	0.138	0.222	0.838999	Phloem	SORBI-3002G412800
SORBI-3003G404000	1.51381e-05	-0.14186	0.229	0.331	0.853502	Phloem	SORBI-3003G404000
SORBI-3006G260400	1.5454e-05	-0.139545	0.786	0.805	0.871313	Phloem	SORBI-3006G260400
Zm00001d032876	1.55567e-05	-0.205256	0.072	0.145	0.877101	Phloem	SORBI-3001G237800
Zm00001d007084	1.55825e-05	-0.250574	0.496	0.581	0.878556	Phloem	SORBI-3002G403400
Zm00001d031132	1.5838e-05	0.158344	0.392	0.31	0.892961	Phloem	SORBI-3008G179500
SORBI-3001G348700	1.60874e-05	0.243244	0.282	0.2	0.907022	Phloem	SORBI-3001G348700
Zm00001d049389	1.61014e-05	0.116012	0.394	0.299	0.907811	Phloem	SORBI-3007G071300
SORBI-3002G245800	1.61121e-05	0.242994	0.381	0.3	0.908418	Phloem	SORBI-3002G245800
SORBI-3009G224400	1.65374e-05	0.13108	0.852	0.823	0.932398	Phloem	SORBI-3009G224400
SORBI-3009G101400	1.71228e-05	0.245943	0.43	0.345	0.965401	Phloem	SORBI-3009G101400
SORBI-3002G217200	1.72363e-05	-0.184065	0.244	0.324	0.971798	Phloem	SORBI-3002G217200
SORBI-3010G043000	1.74007e-05	-0.116936	0.059	0.127	0.981069	Phloem	SORBI-3010G043000
Zm00001d020779	1.76122e-05	0.103701	0.208	0.136	0.992992	Phloem	SORBI-3002G231500
Zm00001d043444	1.79144e-05	-0.165553	0.042	0.103	1	Phloem	SORBI-3003G293900
Zm00001d021094	1.79518e-05	-0.13165	0.044	0.106	1	Phloem	SORBI-3002G261100
SORBI-3001G515600	1.86236e-05	-0.109876	0.091	0.164	1	Phloem	SORBI-3001G515600
Zm00001d015008	1.86697e-05	-0.27313	0.407	0.466	1	Phloem	SORBI-3004G013500
SORBI-3006G058300	1.87285e-05	0.130601	0.161	0.102	1	Phloem	SORBI-3006G058300
SORBI-3004G247400	1.89219e-05	-0.164183	0.104	0.177	1	Phloem	SORBI-3004G247400
SORBI-3003G249700	1.89393e-05	-0.178683	0.659	0.733	1	Phloem	SORBI-3003G249700
SORBI-3003G250340	1.89829e-05	-0.190718	0.106	0.178	1	Phloem	SORBI-3003G250340
Zm00001d046186	1.90918e-05	-0.159626	0.053	0.117	1	Phloem	SORBI-3010G161800
SORBI-3007G053300	1.92494e-05	-0.120528	0.871	0.853	1	Phloem	SORBI-3007G053300
SORBI-3002G129200	1.95216e-05	0.166871	0.559	0.463	1	Phloem	SORBI-3002G129200
Zm00001d039065	1.99553e-05	-0.145482	0.061	0.125	1	Phloem	SORBI-3009G237600
Zm00001d052231	2.01365e-05	-0.174269	0.155	0.238	1	Phloem	SORBI-3004G233900
SORBI-3001G462100	2.0336e-05	-0.179567	0.244	0.331	1	Phloem	SORBI-3001G462100
Zm00001d028183	2.03602e-05	-0.173693	0.358	0.469	1	Phloem	SORBI-3001G460500
SORBI-3002G340900	2.05149e-05	-0.115413	0.206	0.302	1	Phloem	SORBI-3002G340900
Zm00001d052488	2.07194e-05	-0.106285	0.178	0.266	1	Phloem	SORBI-3005G033200
SORBI-3004G008400	2.07363e-05	-0.150274	0.864	0.845	1	Phloem	SORBI-3004G008400
Zm00001d045263	2.07493e-05	0.110485	0.258	0.185	1	Phloem	SORBI-3010G047400
SORBI-3001G209101	2.08066e-05	0.111804	0.155	0.097	1	Phloem	SORBI-3001G209101
SORBI-3008G079800	2.09251e-05	-0.195289	0.445	0.574	1	Phloem	SORBI-3008G079800
SORBI-3009G188000	2.13877e-05	-0.208461	0.309	0.382	1	Phloem	SORBI-3009G188000
SORBI-3001G260800	2.13963e-05	-0.147167	0.333	0.435	1	Phloem	SORBI-3001G260800
SORBI-3009G028500	2.14997e-05	0.219242	0.381	0.305	1	Phloem	SORBI-3009G028500
SORBI-3001G204900	2.16667e-05	-0.165749	0.284	0.371	1	Phloem	SORBI-3001G204900
Zm00001d017375	2.17782e-05	-0.243105	0.083	0.151	1	Phloem	SORBI-3004G227800
Zm00001d038382	2.2057e-05	-0.327041	0.307	0.406	1	Phloem	SORBI-3009G165100
SORBI-3007G184600	2.22595e-05	-0.170442	0.667	0.702	1	Phloem	SORBI-3007G184600
Zm00001d043632	2.22987e-05	-0.158621	0.6	0.715	1	Phloem	SORBI-3003G279800
SORBI-3003G203600	2.23492e-05	-0.238481	0.042	0.102	1	Phloem	SORBI-3003G203600
Zm00001d025690	2.25745e-05	0.104823	0.294	0.217	1	Phloem	SORBI-3006G120900
SORBI-3006G276700	2.25764e-05	0.210788	0.502	0.453	1	Phloem	SORBI-3006G276700
Zm00001d006551	2.32205e-05	0.113757	0.326	0.237	1	Phloem	SORBI-3002G330300
Zm00001d020450	2.37785e-05	-0.214709	0.542	0.583	1	Phloem	SORBI-3002G200600
SORBI-3001G073600	2.37824e-05	0.179327	0.585	0.537	1	Phloem	SORBI-3001G073600
Zm00001d004936	2.3929e-05	0.181388	0.373	0.299	1	Phloem	SORBI-3005G032300
Zm00001d043912	2.39926e-05	-0.129021	0.11	0.186	1	Phloem	SORBI-3003G252300
SORBI-3002G070300	2.41704e-05	-0.147534	0.085	0.156	1	Phloem	SORBI-3002G070300
SORBI-3003G348800	2.42574e-05	-0.12603	0.172	0.258	1	Phloem	SORBI-3003G348800
Zm00001d022636	2.47938e-05	0.109953	0.25	0.175	1	Phloem	SORBI-3002G278500
SORBI-3005G224500	2.53279e-05	-0.774863	0.178	0.254	1	Phloem	SORBI-3005G224500
SORBI-3003G260300	2.57004e-05	0.1379	0.337	0.248	1	Phloem	SORBI-3003G260300
Zm00001d029448	2.60714e-05	0.139934	0.398	0.305	1	Phloem	SORBI-3001G343900
Zm00001d004509	2.64901e-05	-0.12647	0.053	0.114	1	Phloem	SORBI-3006G010100
SORBI-3003G319000	2.67875e-05	0.117053	0.371	0.281	1	Phloem	SORBI-3003G319000
SORBI-3009G233400	2.69018e-05	-0.148909	0.703	0.763	1	Phloem	SORBI-3009G233400
Zm00001d042921	2.69176e-05	0.136278	0.32	0.238	1	Phloem	SORBI-3003G350800
Zm00001d030795	2.75968e-05	-0.141	0.123	0.202	1	Phloem	SORBI-3008G141600
SORBI-3002G386200	2.76046e-05	0.195067	0.483	0.403	1	Phloem	SORBI-3002G386200
Zm00001d031659	2.79125e-05	0.146235	0.477	0.382	1	Phloem	SORBI-3007G190100
Zm00001d039532	2.80699e-05	0.239653	0.369	0.304	1	Phloem	SORBI-3003G037500
Zm00001d025857	2.81713e-05	-0.132704	0.769	0.813	1	Phloem	SORBI-3006G147000
SORBI-3003G400600	2.95599e-05	0.108146	0.292	0.211	1	Phloem	SORBI-3003G400600
Zm00001d040361	2.97891e-05	-0.110605	0.184	0.277	1	Phloem	SORBI-3003G121500
Zm00001d010583	3.02633e-05	0.111219	0.371	0.285	1	Phloem	SORBI-3009G168000
Zm00001d010924	3.04051e-05	-0.152293	0.087	0.159	1	Phloem	SORBI-3009G033400
Zm00001d019531	3.04808e-05	0.104453	0.339	0.256	1	Phloem	SORBI-3002G121000
SORBI-3001G064200	3.08044e-05	0.176478	0.32	0.236	1	Phloem	SORBI-3001G064200
SORBI-3009G175200	3.09162e-05	-0.132298	0.15	0.238	1	Phloem	SORBI-3009G175200
Zm00001d033531	3.12153e-05	0.184915	0.57	0.537	1	Phloem	SORBI-3001G134200
SORBI-3007G150800	3.15258e-05	-0.135156	0.309	0.402	1	Phloem	SORBI-3007G150800
SORBI-3003G429200	3.16495e-05	-0.157202	0.176	0.262	1	Phloem	SORBI-3003G429200
Zm00001d034991	3.23408e-05	0.151842	0.352	0.271	1	Phloem	SORBI-3007G006600
SORBI-3006G201500	3.28956e-05	-0.172877	0.657	0.722	1	Phloem	SORBI-3006G201500
SORBI-3001G467000	3.30382e-05	-0.185787	0.22	0.301	1	Phloem	SORBI-3001G467000
Zm00001d042609	3.32501e-05	0.185585	0.373	0.296	1	Phloem	SORBI-3003G379700
Zm00001d034356	3.32539e-05	0.403058	0.369	0.303	1	Phloem	SORBI-3001G065800
SORBI-3002G026300	3.34095e-05	-0.236194	0.383	0.48	1	Phloem	SORBI-3002G026300
SORBI-3003G346400	3.34595e-05	-0.128948	0.112	0.191	1	Phloem	SORBI-3003G346400
Zm00001d033225	3.36987e-05	-0.10901	0.078	0.15	1	Phloem	SORBI-3001G155500
Zm00001d002500	3.42464e-05	-0.37587	0.288	0.36	1	Phloem	SORBI-3006G196200
Zm00001d026415	3.42659e-05	-0.183599	0.121	0.2	1	Phloem	SORBI-3006G235600
Zm00001d010044	3.45699e-05	-0.132147	0.144	0.228	1	Phloem	SORBI-3009G088200
SORBI-3003G322400	3.4574e-05	-0.146413	0.835	0.82	1	Phloem	SORBI-3003G322400
Zm00001d022062	3.47351e-05	-0.191806	0.07	0.133	1	Phloem	SORBI-3002G366600
Zm00001d047342	3.50451e-05	0.129881	0.278	0.197	1	Phloem	SORBI-3001G329600
Zm00001d054017	3.55415e-05	-0.196565	0.091	0.16	1	Phloem	SORBI-3004G013000
SORBI-3001G147200	3.57331e-05	0.163356	0.4	0.32	1	Phloem	SORBI-3001G147200
Zm00001d010421	3.58248e-05	0.138245	0.458	0.371	1	Phloem	SORBI-3009G082600
Zm00001d002759	3.58939e-05	0.118313	0.273	0.195	1	Phloem	SORBI-3006G168300
Zm00001d045069	3.61926e-05	-0.135588	0.822	0.83	1	Phloem	SORBI-3010G069400
Zm00001d024523	3.61943e-05	0.121777	0.466	0.37	1	Phloem	SORBI-3007G051700
Zm00001d023429	3.64858e-05	-0.17756	0.193	0.281	1	Phloem	SORBI-3008G038600
Zm00001d031179	3.76034e-05	0.147978	0.369	0.286	1	Phloem	SORBI-3008G185400
SORBI-3009G250900	3.76147e-05	-0.152089	0.18	0.267	1	Phloem	SORBI-3009G250900
SORBI-3001G076800	3.84408e-05	-0.266727	0.193	0.276	1	Phloem	SORBI-3001G076800
SORBI-3001G465400	3.84939e-05	0.103096	0.273	0.197	1	Phloem	SORBI-3001G465400
SORBI-3007G028400	3.85665e-05	-0.122831	0.911	0.893	1	Phloem	SORBI-3007G028400
Zm00001d037281	3.87525e-05	0.286718	0.176	0.117	1	Phloem	SORBI-3010G102500
Zm00001d054105	3.93133e-05	-0.209739	0.195	0.277	1	Phloem	SORBI-3004G000100
SORBI-3001G407700	3.93219e-05	-0.135282	0.261	0.358	1	Phloem	SORBI-3001G407700
SORBI-3003G297900	3.93424e-05	0.154254	0.508	0.422	1	Phloem	SORBI-3003G297900
Zm00001d006871	3.97968e-05	-0.15101	0.669	0.723	1	Phloem	SORBI-3002G374900
SORBI-3001G062600	3.98521e-05	-0.267749	0.307	0.374	1	Phloem	SORBI-3001G062600
SORBI-3007G149600	4.05444e-05	-0.261517	0.506	0.618	1	Phloem	SORBI-3007G149600
SORBI-3002G339000	4.21904e-05	0.170694	0.288	0.214	1	Phloem	SORBI-3002G339000
Zm00001d014880	4.27938e-05	-0.114962	0.051	0.112	1	Phloem	SORBI-3010G277000
SORBI-3009G240700	4.34571e-05	0.114289	0.756	0.718	1	Phloem	SORBI-3009G240700
Zm00001d024178	4.45341e-05	-0.209241	0.142	0.227	1	Phloem	SORBI-3007G090600
Zm00001d018214	4.4987e-05	-0.136912	0.089	0.161	1	Phloem	SORBI-3004G313200
Zm00001d031727	4.51426e-05	-0.161149	0.104	0.175	1	Phloem	SORBI-3007G181600
SORBI-3004G301700	4.61955e-05	-0.143579	0.256	0.353	1	Phloem	SORBI-3004G301700
SORBI-3003G135600	4.62882e-05	0.160989	0.534	0.482	1	Phloem	SORBI-3003G135600
SORBI-3002G244300	4.63926e-05	-0.107319	0.042	0.101	1	Phloem	SORBI-3002G244300
SORBI-3002G353900	4.70015e-05	-0.153263	0.078	0.146	1	Phloem	SORBI-3002G353900
SORBI-3002G343600	4.74032e-05	-0.193387	0.364	0.468	1	Phloem	SORBI-3002G343600
Zm00001d034615	4.8078e-05	0.147555	0.275	0.205	1	Phloem	SORBI-3001G038900
Zm00001d016438	4.86175e-05	0.242932	0.383	0.315	1	Phloem	SORBI-3004G086800
Zm00001d007361	4.88012e-05	-0.138051	0.07	0.135	1	Phloem	SORBI-3005G126300
SORBI-3001G317000	4.91892e-05	0.135043	0.316	0.23	1	Phloem	SORBI-3001G317000
SORBI-3003G152700	4.94755e-05	-0.140492	0.07	0.134	1	Phloem	SORBI-3003G152700
SORBI-3009G084900	4.97776e-05	-0.222533	0.263	0.347	1	Phloem	SORBI-3009G084900
SORBI-3010G176550	4.99695e-05	-0.196655	0.097	0.168	1	Phloem	SORBI-3010G176550
Zm00001d045888	5.04983e-05	0.154603	0.379	0.286	1	Phloem	SORBI-3010G132000
SORBI-3003G400800	5.07636e-05	-0.188106	0.392	0.46	1	Phloem	SORBI-3003G400800
Zm00001d043830	5.13068e-05	0.122107	0.197	0.134	1	Phloem	SORBI-3003G260800
Zm00001d016364	5.15853e-05	0.135456	0.335	0.253	1	Phloem	SORBI-3004G093700
Zm00001d051187	5.16573e-05	-0.167076	0.106	0.179	1	Phloem	SORBI-3004G223300
Zm00001d047500	5.18646e-05	-0.13547	0.631	0.696	1	Phloem	SORBI-3001G376600
SORBI-3004G220000	5.1868e-05	-0.131628	0.758	0.777	1	Phloem	SORBI-3004G220000
Zm00001d035948.1	5.21061e-05	0.184265	0.697	0.699	1	Phloem	Zm00001d035948.1
SORBI-3009G054800	5.22115e-05	-0.133767	0.737	0.788	1	Phloem	SORBI-3009G054800
SORBI-3009G045900	5.2381e-05	-0.151918	0.104	0.178	1	Phloem	SORBI-3009G045900
SORBI-3003G012700	5.34232e-05	-0.129104	0.852	0.823	1	Phloem	SORBI-3003G012700
SORBI-3003G078200	5.37378e-05	-0.116873	0.926	0.899	1	Phloem	SORBI-3003G078200
SORBI-3004G104100	5.39934e-05	-0.146632	0.381	0.481	1	Phloem	SORBI-3004G104100
Zm00001d047873	5.42698e-05	0.101928	0.153	0.094	1	Phloem	SORBI-3001G429200
SORBI-3009G234800	5.43078e-05	0.237356	0.502	0.474	1	Phloem	SORBI-3009G234800
Zm00001d008289	5.4744e-05	-0.149759	0.104	0.179	1	Phloem	SORBI-3003G123200
Zm00001d013444	5.58007e-05	-0.101047	0.136	0.215	1	Phloem	SORBI-3001G118200
Zm00001d013522	5.58746e-05	0.1071	0.172	0.114	1	Phloem	SORBI-3001G131400
Zm00001d031871	5.60275e-05	-0.22646	0.097	0.168	1	Phloem	SORBI-3007G163800
Zm00001d045320	5.64725e-05	0.158544	0.432	0.367	1	Phloem	SORBI-3010G042100
SORBI-3003G325700	5.66856e-05	0.135375	0.22	0.156	1	Phloem	SORBI-3003G325700
SORBI-3006G079300	5.67382e-05	-0.842	0.064	0.123	1	Phloem	SORBI-3006G079300
Zm00001d046893	5.67833e-05	-0.209494	0.112	0.188	1	Phloem	SORBI-3010G216700
Zm00001d029231	5.71066e-05	-0.208225	0.148	0.22	1	Phloem	SORBI-3001G365200
Zm00001d036233	5.76549e-05	0.170639	0.47	0.399	1	Phloem	SORBI-3010G044200
SORBI-3001G034100	5.76798e-05	-0.216507	0.123	0.188	1	Phloem	SORBI-3001G034100
SORBI-3001G461400	5.787e-05	-0.117795	0.146	0.227	1	Phloem	SORBI-3001G461400
Zm00001d044106.2	5.9687e-05	-0.157777	0.119	0.194	1	Phloem	Zm00001d044106.2
Zm00001d043217	5.98921e-05	0.157014	0.409	0.333	1	Phloem	SORBI-3003G323600
Zm00001d015658	6.07983e-05	0.106946	0.311	0.226	1	Phloem	SORBI-3004G074500
SORBI-3003G092200	6.09446e-05	-0.183662	0.153	0.237	1	Phloem	SORBI-3003G092200
Zm00001d025024	6.10956e-05	-0.246399	0.078	0.142	1	Phloem	SORBI-3006G028200
Zm00001d014772	6.16218e-05	0.150248	0.617	0.619	1	Phloem	SORBI-3010G264300
SORBI-3007G011000	6.17149e-05	0.100651	0.267	0.193	1	Phloem	SORBI-3007G011000
Zm00001d042569	6.24522e-05	-0.194782	0.314	0.392	1	Phloem	SORBI-3003G382900
SORBI-3003G082600	6.32467e-05	0.468565	0.409	0.346	1	Phloem	SORBI-3003G082600
Zm00001d022498	6.37708e-05	-0.106776	0.159	0.245	1	Phloem	SORBI-3002G408900
SORBI-3010G071200	6.38557e-05	0.131184	0.394	0.317	1	Phloem	SORBI-3010G071200
Zm00001d039262	6.39516e-05	-0.108868	0.061	0.125	1	Phloem	SORBI-3003G002800
SORBI-3001G526600	6.42956e-05	0.166673	0.386	0.308	1	Phloem	SORBI-3001G526600
SORBI-3004G268700	6.43389e-05	-0.142105	0.049	0.106	1	Phloem	SORBI-3004G268700
SORBI-3003G215700	6.48349e-05	0.182279	0.729	0.726	1	Phloem	SORBI-3003G215700
SORBI-3002G268700	6.49518e-05	-0.116144	0.208	0.307	1	Phloem	SORBI-3002G268700
Zm00001d010575	6.62584e-05	-0.342222	0.475	0.563	1	Phloem	SORBI-3009G167500
SORBI-3003G280500	6.63738e-05	-0.173189	0.049	0.104	1	Phloem	SORBI-3003G280500
Zm00001d002659	6.89785e-05	0.1862	0.496	0.426	1	Phloem	SORBI-3006G179800
SORBI-3003G339500	6.90511e-05	-0.133401	0.081	0.145	1	Phloem	SORBI-3003G339500
Zm00001d031825	6.96947e-05	0.155488	0.636	0.644	1	Phloem	SORBI-3007G159700
SORBI-3001G510800	6.99475e-05	-0.126853	0.862	0.871	1	Phloem	SORBI-3001G510800
SORBI-3002G375800	7.01736e-05	0.109167	0.273	0.197	1	Phloem	SORBI-3002G375800
Zm00001d032313	7.09261e-05	0.120805	0.345	0.271	1	Phloem	SORBI-3007G126200
Zm00001d028332	7.17659e-05	-0.163629	0.182	0.261	1	Phloem	SORBI-3001G445500
SORBI-3009G231700	7.23965e-05	0.130917	0.341	0.261	1	Phloem	SORBI-3009G231700
SORBI-3004G244800	7.31144e-05	-0.11641	0.928	0.904	1	Phloem	SORBI-3004G244800
SORBI-3009G223300	7.3181e-05	-0.143081	0.803	0.802	1	Phloem	SORBI-3009G223300
SORBI-3004G242100	7.34362e-05	0.141851	0.441	0.353	1	Phloem	SORBI-3004G242100
Zm00001d024647	7.35204e-05	0.100827	0.212	0.148	1	Phloem	SORBI-3007G036700
Zm00001d023434	7.36121e-05	-0.191638	0.066	0.127	1	Phloem	SORBI-3008G039800
SORBI-3003G300100	7.37576e-05	-0.141072	0.222	0.308	1	Phloem	SORBI-3003G300100
Zm00001d046952	7.37669e-05	-0.132024	0.055	0.116	1	Phloem	SORBI-3010G220500
Zm00001d020267	7.42404e-05	-0.112118	0.583	0.698	1	Phloem	SORBI-3002G184400
Zm00001d015431	7.55999e-05	0.16318	0.703	0.667	1	Phloem	SORBI-3004G060500
SORBI-3004G160700	7.65575e-05	-0.131994	0.587	0.649	1	Phloem	SORBI-3004G160700
SORBI-3001G280800	7.65899e-05	-0.143311	0.047	0.104	1	Phloem	SORBI-3001G280800
Zm00001d016463	7.79014e-05	-0.147628	0.193	0.277	1	Phloem	SORBI-3004G140300
Zm00001d040048	8.21684e-05	-0.453973	0.222	0.284	1	Phloem	SORBI-3003G092900
SORBI-3003G265200	8.25973e-05	0.272391	0.409	0.351	1	Phloem	SORBI-3003G265200
Zm00001d013481	8.50647e-05	-0.141865	0.21	0.297	1	Phloem	SORBI-3001G123500
Zm00001d037876	8.53707e-05	-0.185025	0.532	0.611	1	Phloem	SORBI-3009G115700
SORBI-3009G029600	8.72564e-05	0.124689	0.358	0.276	1	Phloem	SORBI-3009G029600
SORBI-3004G232500	8.92606e-05	-0.13666	0.074	0.136	1	Phloem	SORBI-3004G232500
Zm00001d028546	8.93311e-05	-0.127396	0.201	0.288	1	Phloem	SORBI-3001G426600
Zm00001d050864.1	8.95239e-05	0.340078	0.364	0.295	1	Phloem	Zm00001d050864.1
Zm00001d052482	9.00717e-05	0.128984	0.206	0.144	1	Phloem	SORBI-3005G033000
Zm00001d053367	9.0164e-05	-0.145578	0.375	0.468	1	Phloem	SORBI-3004G117400
SORBI-3006G076000	9.0399e-05	-0.1735	0.441	0.543	1	Phloem	SORBI-3006G076000
Zm00001d009224	9.41322e-05	-0.171516	0.066	0.126	1	Phloem	SORBI-3003G154500
Zm00001d023333	9.45522e-05	-0.251955	0.106	0.177	1	Phloem	SORBI-3008G028700
Zm00001d031040	9.47745e-05	-0.109876	0.133	0.21	1	Phloem	SORBI-3008G163300
Zm00001d028536	9.79182e-05	-0.114709	0.095	0.163	1	Phloem	SORBI-3001G427700
Zm00001d053982	9.97064e-05	-0.132371	0.114	0.192	1	Phloem	SORBI-3004G029100
Zm00001d018461	0.000101147	0.251283	0.449	0.406	1	Phloem	SORBI-3004G341800
Zm00001d008377	0.000101761	-0.125187	0.286	0.377	1	Phloem	SORBI-3003G110200
SORBI-3007G106500	0.000102095	-0.19733	0.178	0.253	1	Phloem	SORBI-3007G106500
Zm00001d037684	0.000102461	-0.938468	0.354	0.373	1	Phloem	SORBI-3009G070400
Zm00001d045053	0.000102934	-0.130716	0.525	0.632	1	Phloem	SORBI-3010G070500
SORBI-3002G343300	0.000104519	0.176256	0.22	0.159	1	Phloem	SORBI-3002G343300
Zm00001d046630	0.000106514	-0.251506	0.248	0.331	1	Phloem	SORBI-3010G201500
Zm00001d049088	0.000107317	-0.200861	0.097	0.164	1	Phloem	SORBI-3005G106900
SORBI-3004G119200	0.000107705	0.140654	0.434	0.361	1	Phloem	SORBI-3004G119200
SORBI-3009G101700	0.000108646	-0.147791	0.258	0.355	1	Phloem	SORBI-3009G101700
SORBI-3008G147900	0.000108672	0.208332	0.551	0.503	1	Phloem	SORBI-3008G147900
SORBI-3002G356101	0.000111543	0.239239	0.519	0.475	1	Phloem	SORBI-3002G356101
Zm00001d038299	0.000112324	-0.163333	0.07	0.134	1	Phloem	SORBI-3009G155300
Zm00001d002126	0.000112858	0.118073	0.333	0.253	1	Phloem	SORBI-3006G235800
SORBI-3001G424700	0.000114754	0.138702	0.208	0.145	1	Phloem	SORBI-3001G424700
Zm00001d046718	0.0001155	0.208871	0.422	0.351	1	Phloem	SORBI-3010G194900
Zm00001d028426	0.000116174	-0.118049	0.708	0.765	1	Phloem	SORBI-3001G436200
Zm00001d017072	0.000116257	0.144424	0.343	0.268	1	Phloem	SORBI-3004G200200
SORBI-3003G057100	0.000118034	-0.259718	0.396	0.47	1	Phloem	SORBI-3003G057100
SORBI-3003G130900	0.000118149	-0.118292	0.267	0.365	1	Phloem	SORBI-3003G130900
Zm00001d028474	0.000120415	0.17424	0.186	0.125	1	Phloem	SORBI-3001G433200
SORBI-3004G219800	0.000121237	0.111467	0.239	0.171	1	Phloem	SORBI-3004G219800
SORBI-3006G141500	0.000121354	0.119723	0.371	0.289	1	Phloem	SORBI-3006G141500
SORBI-3009G154700	0.000122136	-0.129208	0.102	0.169	1	Phloem	SORBI-3009G154700
Zm00001d052749	0.000122265	-0.22188	0.237	0.33	1	Phloem	SORBI-3007G000500
Zm00001d014971	0.000123542	-0.223374	0.083	0.147	1	Phloem	SORBI-3004G008600
Zm00001d019400	0.000126173	-0.146044	0.087	0.153	1	Phloem	SORBI-3002G109100
SORBI-3002G057900	0.000126693	0.640523	0.553	0.567	1	Phloem	SORBI-3002G057900
Zm00001d038147	0.000126948	0.166429	0.494	0.441	1	Phloem	SORBI-3009G131100
Zm00001d025406	0.000127023	-0.201833	0.275	0.374	1	Phloem	SORBI-3006G081800
Zm00001d047618	0.00012912	0.244743	0.494	0.451	1	Phloem	SORBI-3001G393500
SORBI-3009G197000	0.000129274	0.172889	0.227	0.163	1	Phloem	SORBI-3009G197000
SORBI-3002G155100	0.000129742	-0.10139	0.233	0.327	1	Phloem	SORBI-3002G155100
Zm00001d027855	0.000130612	-0.212418	0.167	0.248	1	Phloem	SORBI-3001G488600
Zm00001d045130.1	0.000131298	0.123881	0.305	0.225	1	Phloem	Zm00001d045130.1
Zm00001d011236	0.000131773	-0.218918	0.271	0.351	1	Phloem	SORBI-3003G200501
Zm00001d032748	0.000132157	-0.11423	0.246	0.35	1	Phloem	SORBI-3001G224200
SORBI-3005G163700	0.000132162	-0.107528	0.265	0.371	1	Phloem	SORBI-3005G163700
Zm00001d052943	0.000132343	-0.103456	0.182	0.264	1	Phloem	SORBI-3005G162500
Zm00001d047283	0.000133818	-0.193981	0.15	0.222	1	Phloem	SORBI-3001G335900
Zm00001d049399	0.000133897	-0.118222	0.453	0.589	1	Phloem	SORBI-3007G069700
Zm00001d031013	0.000134416	-0.171242	0.121	0.187	1	Phloem	SORBI-3008G160700
SORBI-3002G384700	0.000134439	-0.133086	0.778	0.798	1	Phloem	SORBI-3002G384700
Zm00001d046883	0.000134485	0.134197	0.396	0.325	1	Phloem	SORBI-3010G217900
Zm00001d040477	0.000134851	-0.190035	0.153	0.218	1	Phloem	SORBI-3003G134300
Zm00001d049526	0.000134921	0.103288	0.203	0.144	1	Phloem	SORBI-3007G050000
Zm00001d021665	0.000136487	0.113047	0.261	0.189	1	Phloem	SORBI-3002G323900
SORBI-3006G077300	0.000137871	-0.223134	0.095	0.159	1	Phloem	SORBI-3006G077300
SORBI-3006G028100	0.000138479	0.108973	0.256	0.188	1	Phloem	SORBI-3006G028100
Zm00001d051879	0.000138779	0.127116	0.352	0.273	1	Phloem	SORBI-3004G350300
SORBI-3006G132900	0.000140609	-0.131801	0.184	0.265	1	Phloem	SORBI-3006G132900
Zm00001d031677	0.000141013	0.185316	0.453	0.387	1	Phloem	SORBI-3007G187800
Zm00001d010465	0.000142781	-0.177139	0.097	0.164	1	Phloem	SORBI-3009G125800
SORBI-3003G334700	0.000142801	-0.107762	0.318	0.415	1	Phloem	SORBI-3003G334700
SORBI-3008G101600	0.000144051	0.126872	0.311	0.234	1	Phloem	SORBI-3008G101600
SORBI-3010G213600	0.000147899	-0.256405	0.089	0.153	1	Phloem	SORBI-3010G213600
SORBI-3009G227600	0.000149919	-0.218366	0.106	0.173	1	Phloem	SORBI-3009G227600
SORBI-3001G404800	0.000150106	0.184449	0.517	0.49	1	Phloem	SORBI-3001G404800
SORBI-3006G233100	0.000150388	0.124234	0.547	0.458	1	Phloem	SORBI-3006G233100
Zm00001d018977	0.000153011	-0.139103	0.174	0.258	1	Phloem	SORBI-3002G056000
Zm00001d009690	0.000154432	-0.163636	0.072	0.132	1	Phloem	SORBI-3009G246500
SORBI-3009G217000	0.000155164	0.11891	0.36	0.284	1	Phloem	SORBI-3009G217000
Zm00001d017240	0.000157313	0.10221	0.377	0.285	1	Phloem	SORBI-3004G216600
SORBI-3001G458800	0.000160834	0.136904	0.663	0.629	1	Phloem	SORBI-3001G458800
SORBI-3003G065400	0.000162506	-0.10374	0.083	0.148	1	Phloem	SORBI-3003G065400
SORBI-3003G087000	0.000165214	-0.143078	0.472	0.539	1	Phloem	SORBI-3003G087000
Zm00001d029558	0.000165453	-0.424042	0.11	0.169	1	Phloem	SORBI-3001G333400
SORBI-3003G253500	0.000165477	0.147922	0.278	0.204	1	Phloem	SORBI-3003G253500
SORBI-3002G128200	0.000166684	0.104071	0.29	0.219	1	Phloem	SORBI-3002G128200
SORBI-3009G065600	0.00016933	0.15334	0.311	0.24	1	Phloem	SORBI-3009G065600
SORBI-3001G019900	0.000172425	0.12314	0.311	0.235	1	Phloem	SORBI-3001G019900
Zm00001d010218.4	0.00017265	0.165911	0.339	0.258	1	Phloem	Zm00001d010218.4
Zm00001d043479	0.000174536	-0.25783	0.169	0.227	1	Phloem	SORBI-3003G296600
Zm00001d046995	0.00017502	-0.193795	0.112	0.183	1	Phloem	SORBI-3010G224800
Zm00001d012407	0.000175189	-0.177641	0.619	0.66	1	Phloem	SORBI-3003G352300
Zm00001d024493	0.00018015	-0.132723	0.301	0.393	1	Phloem	SORBI-3007G054800
Zm00001d018903	0.000182926	-0.111834	0.922	0.874	1	Phloem	SORBI-3002G047600
Zm00001d032363	0.000183544	0.167301	0.324	0.252	1	Phloem	SORBI-3007G107000
SORBI-3007G114200	0.000185004	0.165564	0.534	0.481	1	Phloem	SORBI-3007G114200
SORBI-3003G095800	0.000185749	-0.291081	0.123	0.19	1	Phloem	SORBI-3003G095800
SORBI-3010G012200	0.000186098	-0.138363	0.089	0.149	1	Phloem	SORBI-3010G012200
SORBI-3008G173000	0.000187351	-0.133661	0.464	0.555	1	Phloem	SORBI-3008G173000
Zm00001d019376	0.00018766	-0.13716	0.125	0.199	1	Phloem	SORBI-3002G107000
SORBI-3010G115200	0.000189198	-0.121553	0.206	0.296	1	Phloem	SORBI-3010G115200
SORBI-3003G436700	0.000189798	-0.110327	0.831	0.82	1	Phloem	SORBI-3003G436700
Zm00001d001765	0.000193518	-0.112021	0.104	0.171	1	Phloem	SORBI-3006G274600
Zm00001d045460	0.00019552	0.153334	0.339	0.258	1	Phloem	SORBI-3010G023200
SORBI-3001G086200	0.000195951	-0.228414	0.5	0.545	1	Phloem	SORBI-3001G086200
SORBI-3003G236600	0.000197469	-0.314152	0.326	0.378	1	Phloem	SORBI-3003G236600
SORBI-3002G082600	0.000198324	0.141328	0.32	0.242	1	Phloem	SORBI-3002G082600
Zm00001d047787.1	0.00020314	-0.227202	0.515	0.607	1	Phloem	Zm00001d047787.1
SORBI-3006G241600	0.000204987	-0.148991	0.153	0.219	1	Phloem	SORBI-3006G241600
Zm00001d003118	0.000205768	-0.124777	0.737	0.751	1	Phloem	SORBI-3006G138100
SORBI-3001G288900	0.000211175	-0.102794	0.231	0.309	1	Phloem	SORBI-3001G288900
Zm00001d038085	0.000213954	-0.144153	0.214	0.295	1	Phloem	SORBI-3009G124000
Zm00001d013786	0.00021645	-0.205031	0.123	0.187	1	Phloem	SORBI-3001G181300
Zm00001d051044	0.000217673	-0.104208	0.051	0.103	1	Phloem	SORBI-3004G210900
Zm00001d027493	0.000218098	0.169461	0.576	0.567	1	Phloem	SORBI-3001G519000
Zm00001d014073	0.000218832	-0.134856	0.729	0.736	1	Phloem	SORBI-3001G225700
SORBI-3006G158600	0.000220155	0.312002	0.347	0.281	1	Phloem	SORBI-3006G158600
SORBI-3001G403500	0.000222072	-0.151769	0.803	0.78	1	Phloem	SORBI-3001G403500
Zm00001d053857	0.000222347	-0.101708	0.297	0.4	1	Phloem	SORBI-3004G047200
Zm00001d043226	0.000222418	-0.17918	0.178	0.26	1	Phloem	SORBI-3003G322100
SORBI-3008G129600	0.000223253	-0.142338	0.1	0.162	1	Phloem	SORBI-3008G129600
Zm00001d051595	0.000223934	0.139684	0.648	0.652	1	Phloem	SORBI-3004G264700
Zm00001d036024.1	0.000225852	0.191804	0.409	0.336	1	Phloem	Zm00001d036024.1
Zm00001d047470	0.000226532	0.28766	0.744	0.731	1	Phloem	SORBI-3001G370600
Zm00001d016549	0.000232195	-0.138963	0.765	0.74	1	Phloem	SORBI-3004G152400
Zm00001d021400	0.000235404	0.110395	0.358	0.275	1	Phloem	SORBI-3002G293300
SORBI-3002G243500	0.000237657	-0.132154	0.511	0.596	1	Phloem	SORBI-3002G243500
Zm00001d052075	0.000241976	-0.113369	0.659	0.702	1	Phloem	SORBI-3004G322200
SORBI-3007G105900	0.00024372	0.117684	0.231	0.169	1	Phloem	SORBI-3007G105900
SORBI-3004G259432	0.000243911	-0.851197	0.591	0.561	1	Phloem	SORBI-3004G259432
SORBI-3004G274800	0.000244997	-0.119586	0.216	0.301	1	Phloem	SORBI-3004G274800
SORBI-3002G390600	0.000246528	-0.235744	0.379	0.429	1	Phloem	SORBI-3002G390600
SORBI-3006G244800	0.000252327	0.291529	0.538	0.536	1	Phloem	SORBI-3006G244800
SORBI-3004G106900	0.000254543	-0.139661	0.6	0.66	1	Phloem	SORBI-3004G106900
Zm00001d037972.1	0.000254646	-0.123758	0.708	0.708	1	Phloem	Zm00001d037972.1
Zm00001d015956	0.000257698	-0.241905	0.309	0.373	1	Phloem	SORBI-3004G130800
Zm00001d010566	0.000258777	-0.128743	0.831	0.792	1	Phloem	SORBI-3009G166500
SORBI-3001G030400	0.000261616	0.105955	0.314	0.245	1	Phloem	SORBI-3001G030400
SORBI-3010G239500	0.000266711	0.200345	0.587	0.572	1	Phloem	SORBI-3010G239500
SORBI-3002G138800	0.000269413	-0.124121	0.189	0.271	1	Phloem	SORBI-3002G138800
Zm00001d053932	0.000270641	-0.142521	0.335	0.409	1	Phloem	SORBI-3004G021300
SORBI-3002G400000	0.000270773	0.136464	0.413	0.346	1	Phloem	SORBI-3002G400000
SORBI-3010G269700	0.000272161	-0.103914	0.053	0.107	1	Phloem	SORBI-3010G269700
Zm00001d021120	0.000280924	-0.100652	0.081	0.139	1	Phloem	SORBI-3002G261700
SORBI-3002G133000	0.000282652	-0.112462	0.121	0.19	1	Phloem	SORBI-3002G133000
SORBI-3001G052700	0.000290509	-0.200197	0.246	0.317	1	Phloem	SORBI-3001G052700
Zm00001d017113	0.000291522	-0.185289	0.117	0.181	1	Phloem	SORBI-3004G204100
SORBI-3008G174800	0.000291554	0.216647	0.275	0.213	1	Phloem	SORBI-3008G174800
Zm00001d038570	0.000302827	-0.142968	0.343	0.43	1	Phloem	SORBI-3009G182600
SORBI-3006G242100	0.000304584	0.109377	0.373	0.292	1	Phloem	SORBI-3006G242100
SORBI-3010G168900	0.000307249	-0.157021	0.093	0.154	1	Phloem	SORBI-3010G168900
SORBI-3010G187100	0.000316024	-0.142804	0.125	0.188	1	Phloem	SORBI-3010G187100
Zm00001d018178	0.000318169	-0.124346	0.078	0.134	1	Phloem	SORBI-3004G309600
Zm00001d002716	0.000321673	0.140707	0.265	0.199	1	Phloem	SORBI-3006G173100
SORBI-3010G186500	0.00032178	-0.14263	0.157	0.23	1	Phloem	SORBI-3010G186500
SORBI-3003G195000	0.000322809	0.113505	0.271	0.206	1	Phloem	SORBI-3003G195000
SORBI-3008G011600	0.000324633	0.213157	0.415	0.364	1	Phloem	SORBI-3008G011600
Zm00001d031423	0.000328651	0.312404	0.485	0.451	1	Phloem	SORBI-3007G212200
Zm00001d010152	0.000329033	0.114319	0.354	0.279	1	Phloem	SORBI-3009G153600
SORBI-3002G417300	0.000331418	-0.204023	0.104	0.165	1	Phloem	SORBI-3002G417300
SORBI-3010G117900	0.000332022	-0.218127	0.11	0.172	1	Phloem	SORBI-3010G117900
SORBI-3001G432800	0.00033462	-0.209162	0.169	0.235	1	Phloem	SORBI-3001G432800
Zm00001d034931	0.000338844	-0.266526	0.218	0.288	1	Phloem	SORBI-3001G001400
SORBI-3001G077000	0.000338912	-0.174931	0.261	0.324	1	Phloem	SORBI-3001G077000
Zm00001d045044	0.000340811	-0.185858	0.258	0.323	1	Phloem	SORBI-3010G071700
SORBI-3002G420200	0.000341257	-0.316081	0.07	0.123	1	Phloem	SORBI-3002G420200
Zm00001d004498	0.000341636	-0.160261	0.066	0.121	1	Phloem	SORBI-3006G009400
Zm00001d022005	0.000351555	-0.210566	0.479	0.526	1	Phloem	SORBI-3002G360301
Zm00001d003896	0.00035257	-0.112358	0.581	0.674	1	Phloem	SORBI-3006G057200
Zm00001d006871.1	0.000355566	-0.101378	0.767	0.807	1	Phloem	Zm00001d006871.1
SORBI-3003G391300	0.000355943	-0.121385	0.114	0.183	1	Phloem	SORBI-3003G391300
SORBI-3002G385100	0.000357549	-0.114864	0.703	0.76	1	Phloem	SORBI-3002G385100
SORBI-3001G428400	0.000359223	0.132416	0.392	0.31	1	Phloem	SORBI-3001G428400
SORBI-3006G165100	0.000368159	0.283044	0.386	0.324	1	Phloem	SORBI-3006G165100
SORBI-3002G194600	0.000368755	-0.126304	0.095	0.156	1	Phloem	SORBI-3002G194600
Zm00001d017282	0.000374509	-0.10097	0.055	0.105	1	Phloem	SORBI-3004G221300
Zm00001d005756	0.000375373	-0.171889	0.07	0.123	1	Phloem	SORBI-3002G201700
Zm00001d020417	0.000378627	-0.177065	0.153	0.218	1	Phloem	SORBI-3002G196900
SORBI-3006G245400	0.000386861	-0.159454	0.286	0.355	1	Phloem	SORBI-3006G245400
Zm00001d035689	0.000391878	-0.800587	0.057	0.109	1	Phloem	SORBI-3009G008800
Zm00001d044548	0.000393187	-0.163037	0.186	0.255	1	Phloem	SORBI-3003G182400
SORBI-3003G420300	0.000399062	-0.133472	0.083	0.14	1	Phloem	SORBI-3003G420300
SORBI-3001G318600	0.000405001	-0.114037	0.072	0.126	1	Phloem	SORBI-3001G318600
Zm00001d010529	0.000406279	0.136117	0.18	0.128	1	Phloem	SORBI-3009G163900
Zm00001d004729.6	0.000408867	-0.255697	0.14	0.208	1	Phloem	Zm00001d004729.6
Zm00001d023833	0.000410269	0.108891	0.237	0.176	1	Phloem	SORBI-3008G123600
Zm00001d044287	0.000420074	-0.130167	0.756	0.746	1	Phloem	SORBI-3003G196800
Zm00001d023262	0.000428285	-0.131115	0.114	0.177	1	Phloem	SORBI-3008G015200
SORBI-3004G325100	0.000432061	-0.151115	0.184	0.252	1	Phloem	SORBI-3004G325100
SORBI-3007G025400	0.000439184	0.203716	0.566	0.549	1	Phloem	SORBI-3007G025400
SORBI-3003G193700	0.000439217	-0.130132	0.127	0.194	1	Phloem	SORBI-3003G193700
SORBI-3006G013000	0.000445372	0.168389	0.46	0.408	1	Phloem	SORBI-3006G013000
SORBI-3004G323300	0.000449931	-0.229379	0.231	0.305	1	Phloem	SORBI-3004G323300
Zm00001d046569	0.000457087	0.102488	0.297	0.23	1	Phloem	SORBI-3010G207400
Zm00001d025984	0.000457292	-0.497106	0.235	0.29	1	Phloem	SORBI-3006G165400
SORBI-3009G001200	0.000460238	-0.117288	0.076	0.133	1	Phloem	SORBI-3009G001200
Zm00001d047788	0.000462601	-0.164338	0.278	0.359	1	Phloem	SORBI-3001G417000
Zm00001d019697	0.000464283	-0.131641	0.076	0.133	1	Phloem	SORBI-3002G145300
Zm00001d010825	0.000465676	-0.176038	0.076	0.129	1	Phloem	SORBI-3009G054100
SORBI-3001G039400	0.000469129	-0.127401	0.763	0.745	1	Phloem	SORBI-3001G039400
SORBI-3002G080100	0.000469861	-0.122539	0.254	0.336	1	Phloem	SORBI-3002G080100
Zm00001d012770	0.000478272	-0.122544	0.731	0.738	1	Phloem	SORBI-3003G291500
Zm00001d042091	0.000479347	-0.107096	0.066	0.12	1	Phloem	SORBI-3003G427100
Zm00001d043277	0.00048087	-0.114397	0.163	0.241	1	Phloem	SORBI-3003G315700
Zm00001d040379	0.000484939	-0.135392	0.199	0.284	1	Phloem	SORBI-3003G128800
Zm00001d040831	0.000486487	-0.147823	0.186	0.26	1	Phloem	SORBI-3003G163200
SORBI-3003G333400	0.000499404	0.109561	0.464	0.399	1	Phloem	SORBI-3003G333400
SORBI-3009G189200	0.000503571	-0.138166	0.331	0.408	1	Phloem	SORBI-3009G189200
SORBI-3009G237200	0.00051095	-0.110406	0.174	0.248	1	Phloem	SORBI-3009G237200
SORBI-3002G190900	0.000517233	0.174362	0.54	0.525	1	Phloem	SORBI-3002G190900
Zm00001d012837	0.000523353	-0.209704	0.388	0.481	1	Phloem	SORBI-3001G009700
Zm00001d010217	0.000530644	0.100036	0.136	0.089	1	Phloem	SORBI-3009G145800
SORBI-3003G345400	0.000535714	0.10414	0.174	0.122	1	Phloem	SORBI-3003G345400
SORBI-3009G236100	0.000539422	-0.162874	0.153	0.219	1	Phloem	SORBI-3009G236100
Zm00001d022492	0.000550801	-0.231837	0.076	0.129	1	Phloem	SORBI-3002G409600
Zm00001d004729.7	0.000552238	-0.111593	0.053	0.103	1	Phloem	Zm00001d004729.7
Zm00001d009431	0.000558151	-0.137798	0.492	0.568	1	Phloem	SORBI-3009G216800
Zm00001d002899	0.000563352	-0.110824	0.256	0.351	1	Phloem	SORBI-3006G277600
SORBI-3002G374600	0.000566129	-0.1162	0.138	0.207	1	Phloem	SORBI-3002G374600
SORBI-3010G086200	0.000569479	0.112578	0.335	0.263	1	Phloem	SORBI-3010G086200
SORBI-3002G039000	0.000576068	0.138582	0.434	0.377	1	Phloem	SORBI-3002G039000
Zm00001d016140	0.000576139	-0.174162	0.089	0.141	1	Phloem	SORBI-3004G109900
SORBI-3004G271300	0.000577474	-0.173322	0.265	0.348	1	Phloem	SORBI-3004G271300
Zm00001d019045	0.00058744	-0.155236	0.462	0.55	1	Phloem	SORBI-3002G059200
Zm00001d032932	0.000588203	-0.153266	0.064	0.115	1	Phloem	SORBI-3001G244400
Zm00001d025567	0.000591739	-0.425261	0.451	0.478	1	Phloem	SORBI-3006G100501
Zm00001d034630	0.000592102	0.106092	0.216	0.157	1	Phloem	SORBI-3001G036300
Zm00001d034624	0.000595425	-0.130745	0.104	0.164	1	Phloem	SORBI-3001G037100
SORBI-3001G380700	0.00059759	-0.10925	0.078	0.133	1	Phloem	SORBI-3001G380700
Zm00001d018641	0.00059881	-0.166014	0.367	0.431	1	Phloem	SORBI-3002G007200
Zm00001d039526	0.0006011	-0.200126	0.21	0.28	1	Phloem	SORBI-3003G037000
Zm00001d027355	0.000602498	0.235456	0.498	0.461	1	Phloem	SORBI-3001G532200
Zm00001d045706	0.000609	-0.163014	0.409	0.458	1	Phloem	SORBI-3010G113000
SORBI-3004G271400	0.000610144	-0.141343	0.642	0.669	1	Phloem	SORBI-3004G271400
SORBI-3003G240700	0.000616979	-0.101635	0.263	0.345	1	Phloem	SORBI-3003G240700
SORBI-3010G236500	0.000621325	-0.217511	0.271	0.332	1	Phloem	SORBI-3010G236500
Zm00001d049683	0.000626967	-0.176253	0.087	0.138	1	Phloem	SORBI-3007G017500
Zm00001d046717	0.00064209	-0.127268	0.059	0.11	1	Phloem	SORBI-3010G195000
Zm00001d021879	0.000645646	-0.132705	0.102	0.162	1	Phloem	SORBI-3002G348700
SORBI-3009G050300	0.000647706	-0.10339	0.85	0.859	1	Phloem	SORBI-3009G050300
Zm00001d020902	0.000649936	0.121075	0.318	0.253	1	Phloem	SORBI-3002G244100
Zm00001d016797	0.000651238	-0.162367	0.153	0.218	1	Phloem	SORBI-3004G174700
Zm00001d022327	0.000652107	-0.110013	0.097	0.153	1	Phloem	SORBI-3002G395300
Zm00001d037480	0.00065656	-0.201067	0.148	0.206	1	Phloem	SORBI-3010G057300
Zm00001d016708	0.000657692	-0.307512	0.242	0.308	1	Phloem	SORBI-3004G166700
Zm00001d046455	0.000665268	-0.119326	0.089	0.145	1	Phloem	SORBI-3010G180100
Zm00001d018405	0.00066637	-0.161458	0.093	0.152	1	Phloem	SORBI-3004G333800
SORBI-3007G181500	0.000666919	-0.433623	0.138	0.188	1	Phloem	SORBI-3007G181500
SORBI-3004G162000	0.000669946	-0.209109	0.727	0.726	1	Phloem	SORBI-3004G162000
Zm00001d018359	0.000671854	0.116982	0.371	0.304	1	Phloem	SORBI-3004G327300
SORBI-3008G160600	0.000675715	-0.16782	0.104	0.161	1	Phloem	SORBI-3008G160600
SORBI-3004G187900	0.000676924	0.16845	0.468	0.41	1	Phloem	SORBI-3004G187900
Zm00001d027454	0.000680156	-0.108699	0.076	0.131	1	Phloem	SORBI-3001G523300
SORBI-3005G114800	0.000681826	-0.126444	0.197	0.264	1	Phloem	SORBI-3005G114800
Zm00001d032279	0.000688839	-0.166034	0.097	0.154	1	Phloem	SORBI-3007G119800
Zm00001d011912	0.000694897	-0.273304	0.087	0.14	1	Phloem	SORBI-3003G418300
SORBI-3001G382000	0.000702695	-0.108694	0.106	0.165	1	Phloem	SORBI-3001G382000
SORBI-3010G047100	0.00070481	-0.174245	0.515	0.614	1	Phloem	SORBI-3010G047100
SORBI-3002G179300	0.000722541	-0.116223	0.672	0.709	1	Phloem	SORBI-3002G179300
SORBI-3002G210500	0.000728238	-0.26428	0.415	0.491	1	Phloem	SORBI-3002G210500
Zm00001d013182	0.00073183	-0.164355	0.104	0.163	1	Phloem	SORBI-3001G077200
SORBI-3007G225100	0.000745575	0.134836	0.138	0.093	1	Phloem	SORBI-3007G225100
Zm00001d038852	0.000762287	-0.118225	0.066	0.117	1	Phloem	SORBI-3009G213600
Zm00001d020915	0.000773304	-0.218279	0.157	0.216	1	Phloem	SORBI-3002G245100
SORBI-3006G254500	0.000796564	-0.258821	0.292	0.35	1	Phloem	SORBI-3006G254500
SORBI-3001G263000	0.000797327	0.107728	0.292	0.228	1	Phloem	SORBI-3001G263000
Zm00001d018032	0.000798668	-0.136496	0.055	0.104	1	Phloem	SORBI-3004G238700
SORBI-3002G379600	0.000810724	-0.170257	0.572	0.62	1	Phloem	SORBI-3002G379600
Zm00001d032821	0.000812813	-0.186937	0.125	0.189	1	Phloem	SORBI-3001G231900
SORBI-3010G232100	0.00082109	0.152093	0.712	0.72	1	Phloem	SORBI-3010G232100
SORBI-3007G019400	0.000826421	-0.128167	0.85	0.808	1	Phloem	SORBI-3007G019400
Zm00001d018479	0.000827534	0.146945	0.532	0.478	1	Phloem	SORBI-3004G344800
SORBI-3004G062400	0.000833044	-0.10842	0.267	0.337	1	Phloem	SORBI-3004G062400
SORBI-3009G191600	0.000833735	0.126099	0.155	0.109	1	Phloem	SORBI-3009G191600
SORBI-3007G167800	0.00083646	-0.126721	0.165	0.237	1	Phloem	SORBI-3007G167800
SORBI-3001G423700	0.000841945	-0.150584	0.256	0.332	1	Phloem	SORBI-3001G423700
SORBI-3006G220900	0.000862649	0.124953	0.441	0.375	1	Phloem	SORBI-3006G220900
SORBI-3002G379500	0.000875751	-0.109236	0.873	0.828	1	Phloem	SORBI-3002G379500
SORBI-3008G088866	0.000885675	-0.160486	0.072	0.124	1	Phloem	SORBI-3008G088866
SORBI-3009G204100	0.00089367	-0.191137	0.089	0.14	1	Phloem	SORBI-3009G204100
Zm00001d042451	0.000901488	-0.124571	0.14	0.202	1	Phloem	SORBI-3003G394200
SORBI-3003G410600	0.000902136	-0.161813	0.129	0.19	1	Phloem	SORBI-3003G410600
Zm00001d026312	0.000906321	0.101809	0.379	0.314	1	Phloem	SORBI-3006G217700
Zm00001d015196	0.000913779	-0.150631	0.119	0.181	1	Phloem	SORBI-3004G033300
SORBI-3002G309700	0.000914525	0.130108	0.661	0.666	1	Phloem	SORBI-3002G309700
SORBI-3004G259366	0.000914542	-0.426519	0.095	0.145	1	Phloem	SORBI-3004G259366
SORBI-3004G058600	0.000916928	-0.143672	0.163	0.226	1	Phloem	SORBI-3004G058600
SORBI-3001G035200	0.000921763	0.110292	0.159	0.111	1	Phloem	SORBI-3001G035200
Zm00001d042572	0.000933837	-0.818938	0.186	0.232	1	Phloem	SORBI-3003G382800
SORBI-3006G213000	0.000946125	-0.120402	0.847	0.817	1	Phloem	SORBI-3006G213000
Zm00001d033651	0.000948035	-0.103772	0.133	0.196	1	Phloem	SORBI-3001G123100
SORBI-3002G123200	0.000948812	0.142427	0.434	0.369	1	Phloem	SORBI-3002G123200
SORBI-3006G267500	0.000957884	-0.123188	0.14	0.206	1	Phloem	SORBI-3006G267500
SORBI-3003G252400	0.00097281	0.129119	0.373	0.301	1	Phloem	SORBI-3003G252400
SORBI-3001G046100	0.000976614	-0.128558	0.436	0.504	1	Phloem	SORBI-3001G046100
Zm00001d050201	0.00103595	-0.168452	0.119	0.181	1	Phloem	SORBI-3007G086300
SORBI-3002G215200	0.00103718	-0.11983	0.064	0.112	1	Phloem	SORBI-3002G215200
Zm00001d035526	0.00103909	-0.11781	0.068	0.118	1	Phloem	SORBI-3009G024100
SORBI-3002G010300	0.00103917	0.121215	0.462	0.389	1	Phloem	SORBI-3002G010300
SORBI-3002G339600	0.00104185	-0.548117	0.32	0.355	1	Phloem	SORBI-3002G339600
SORBI-3003G083300	0.00104313	-0.139955	0.231	0.305	1	Phloem	SORBI-3003G083300
Zm00001d042772	0.00104797	-0.126955	0.608	0.657	1	Phloem	SORBI-3003G363800
SORBI-3006G191600	0.00104906	-0.216007	0.112	0.162	1	Phloem	SORBI-3006G191600
SORBI-3002G293200	0.001056	-0.11356	0.318	0.387	1	Phloem	SORBI-3002G293200
Zm00001d025873	0.00105654	-0.17097	0.328	0.415	1	Phloem	SORBI-3006G150700
Zm00001d024319	0.00106122	0.10048	0.538	0.457	1	Phloem	SORBI-3007G076300
Zm00001d003653	0.00107163	0.127673	0.568	0.515	1	Phloem	SORBI-3006G083500
Zm00001d019495	0.00108174	-0.108807	0.11	0.167	1	Phloem	SORBI-3002G117600
Zm00001d035776	0.00109773	-0.112143	0.057	0.105	1	Phloem	SORBI-3009G000100
Zm00001d021526	0.00110256	0.137852	0.453	0.38	1	Phloem	SORBI-3002G306900
Zm00001d052903	0.00110765	-0.105235	0.248	0.324	1	Phloem	SORBI-3007G207600
SORBI-3003G121300	0.00110812	-0.113157	0.061	0.109	1	Phloem	SORBI-3003G121300
Zm00001d017945	0.00111427	-0.15193	0.163	0.222	1	Phloem	SORBI-3004G248800
SORBI-3010G266300	0.00111491	-0.13478	0.581	0.619	1	Phloem	SORBI-3010G266300
Zm00001d053826	0.00111784	-0.205254	0.176	0.239	1	Phloem	SORBI-3004G051200
Zm00001d033368	0.00111914	-0.103507	0.261	0.336	1	Phloem	SORBI-3001G170100
SORBI-3008G156600	0.00112661	-0.147018	0.066	0.114	1	Phloem	SORBI-3008G156600
SORBI-3009G164100	0.00112899	0.131605	0.57	0.525	1	Phloem	SORBI-3009G164100
Zm00001d046660	0.00113344	0.113222	0.106	0.068	1	Phloem	SORBI-3010G199300
SORBI-3002G374100	0.00115279	0.155338	0.538	0.482	1	Phloem	SORBI-3002G374100
Zm00001d042768	0.00116282	-0.150544	0.083	0.133	1	Phloem	SORBI-3003G364300
Zm00001d018872	0.00116804	-0.121516	0.11	0.167	1	Phloem	SORBI-3002G043800
SORBI-3001G025300	0.00117496	0.27607	0.337	0.278	1	Phloem	SORBI-3001G025300
SORBI-3008G030600	0.00118913	-0.116458	0.068	0.117	1	Phloem	SORBI-3008G030600
SORBI-3006G126500	0.0011937	-0.173349	0.407	0.458	1	Phloem	SORBI-3006G126500
Zm00001d044042	0.00121815	0.140492	0.574	0.545	1	Phloem	SORBI-3003G238500
SORBI-3001G040100	0.00122851	-0.100198	0.451	0.493	1	Phloem	SORBI-3001G040100
SORBI-3008G138600	0.00123477	-0.106887	0.11	0.166	1	Phloem	SORBI-3008G138600
Zm00001d033375	0.00124783	-0.109919	0.222	0.296	1	Phloem	SORBI-3001G137000
SORBI-3002G396700	0.00124958	0.129211	0.553	0.498	1	Phloem	SORBI-3002G396700
Zm00001d031562	0.00129283	-0.122707	0.364	0.434	1	Phloem	SORBI-3007G197600
SORBI-3010G096000	0.0012937	-0.14715	0.066	0.112	1	Phloem	SORBI-3010G096000
SORBI-3001G383700	0.00129917	0.262032	0.403	0.351	1	Phloem	SORBI-3001G383700
Zm00001d014122	0.00131564	-0.108348	0.097	0.153	1	Phloem	SORBI-3001G235700
SORBI-3001G096100	0.00132803	-0.151682	0.617	0.625	1	Phloem	SORBI-3001G096100
SORBI-3002G321500	0.00133417	0.120195	0.172	0.124	1	Phloem	SORBI-3002G321500
SORBI-3003G011100	0.00133697	-0.135616	0.595	0.638	1	Phloem	SORBI-3003G011100
SORBI-3010G121300	0.00134337	0.210802	0.468	0.45	1	Phloem	SORBI-3010G121300
Zm00001d017987	0.00134646	-0.135476	0.059	0.106	1	Phloem	SORBI-3004G243800
SORBI-3005G196800	0.00134681	0.14018	0.477	0.418	1	Phloem	SORBI-3005G196800
Zm00001d003195	0.00138274	-0.102279	0.108	0.163	1	Phloem	SORBI-3006G131800
SORBI-3007G137600	0.00138469	-0.114919	0.335	0.418	1	Phloem	SORBI-3007G137600
SORBI-3002G304900	0.00140571	-0.111017	0.64	0.71	1	Phloem	SORBI-3002G304900
SORBI-3004G278400	0.0014059	-0.10539	0.057	0.103	1	Phloem	SORBI-3004G278400
Zm00001d008977	0.00140937	-0.106818	0.059	0.105	1	Phloem	SORBI-3003G011300
Zm00001d046937	0.00141898	0.18903	0.364	0.303	1	Phloem	SORBI-3010G218500
Zm00001d013159	0.00144023	-0.11021	0.191	0.264	1	Phloem	SORBI-3001G073700
SORBI-3005G139075	0.00146544	-0.124015	0.106	0.159	1	Phloem	SORBI-3005G139075
SORBI-3005G195800	0.00146817	-0.161476	0.159	0.222	1	Phloem	SORBI-3005G195800
Zm00001d039821	0.0014912	-0.18612	0.498	0.56	1	Phloem	SORBI-3003G067300
SORBI-3003G220500	0.00149441	-0.122964	0.148	0.214	1	Phloem	SORBI-3003G220500
Zm00001d010804	0.00151111	0.120608	0.47	0.398	1	Phloem	SORBI-3009G206700
SORBI-3006G157200	0.00151663	0.1019	0.466	0.409	1	Phloem	SORBI-3006G157200
SORBI-3001G188400	0.00154099	0.115912	0.195	0.147	1	Phloem	SORBI-3001G188400
SORBI-3001G103900	0.00154299	-0.113319	0.174	0.234	1	Phloem	SORBI-3001G103900
Zm00001d043654	0.00154867	0.105286	0.303	0.239	1	Phloem	SORBI-3003G277500
Zm00001d022616	0.00155289	-0.124517	0.519	0.569	1	Phloem	SORBI-3002G280400
SORBI-3009G026200	0.00157655	-0.178294	0.345	0.395	1	Phloem	SORBI-3009G026200
SORBI-3003G305100	0.00158831	0.141211	0.523	0.477	1	Phloem	SORBI-3003G305100
SORBI-3002G268100	0.00159732	-0.132699	0.559	0.618	1	Phloem	SORBI-3002G268100
Zm00001d042443	0.00160151	-0.166552	0.14	0.192	1	Phloem	SORBI-3003G395400
SORBI-3006G126100	0.00160756	-0.114514	0.102	0.154	1	Phloem	SORBI-3006G126100
SORBI-3003G409800	0.00161373	0.101217	0.345	0.279	1	Phloem	SORBI-3003G409800
SORBI-3001G078900	0.00162786	0.146709	0.377	0.318	1	Phloem	SORBI-3001G078900
SORBI-3008G098800	0.00164557	-0.137475	0.625	0.634	1	Phloem	SORBI-3008G098800
Zm00001d024588	0.00166954	-0.112973	0.309	0.377	1	Phloem	SORBI-3007G044400
Zm00001d012643	0.00167415	-0.103406	0.07	0.118	1	Phloem	SORBI-3003G312700
Zm00001d034032	0.00168122	-0.145428	0.18	0.236	1	Phloem	SORBI-3001G088200
Zm00001d049381.1	0.00168916	-0.148513	0.307	0.226	1	Phloem	Zm00001d049381.1
SORBI-3005G011500	0.00169828	-0.191505	0.068	0.112	1	Phloem	SORBI-3005G011500
SORBI-3002G005300	0.00170781	-0.151205	0.201	0.262	1	Phloem	SORBI-3002G005300
Zm00001d009580	0.00170931	-0.146112	0.108	0.164	1	Phloem	SORBI-3009G233700
SORBI-3010G063801	0.00176019	-0.108802	0.383	0.458	1	Phloem	SORBI-3010G063801
Zm00001d002715	0.0017661	-0.138856	0.146	0.205	1	Phloem	SORBI-3006G173200
SORBI-3003G386000	0.00178261	-0.173408	0.589	0.591	1	Phloem	SORBI-3003G386000
Zm00001d033984	0.00178746	-0.188184	0.189	0.251	1	Phloem	SORBI-3001G093800
Zm00001d019139	0.0018313	-0.105526	0.358	0.43	1	Phloem	SORBI-3002G073700
Zm00001d047527	0.00183569	-0.182953	0.087	0.135	1	Phloem	SORBI-3001G381600
Zm00001d052218	0.00184307	0.140992	0.174	0.126	1	Phloem	SORBI-3004G231900
SORBI-3003G374200	0.0018434	-0.125744	0.102	0.156	1	Phloem	SORBI-3003G374200
SORBI-3010G205300	0.00186835	-0.166347	0.269	0.326	1	Phloem	SORBI-3010G205300
SORBI-3004G325600	0.00187198	-0.123907	0.172	0.236	1	Phloem	SORBI-3004G325600
Zm00001d010859	0.0018835	0.110532	0.231	0.178	1	Phloem	SORBI-3009G045100
Zm00001d045555	0.001893	-0.159466	0.282	0.339	1	Phloem	SORBI-3010G008800
SORBI-3007G134000	0.00190092	-0.127686	0.778	0.774	1	Phloem	SORBI-3007G134000
SORBI-3003G256600	0.00193088	-0.154389	0.059	0.104	1	Phloem	SORBI-3003G256600
SORBI-3001G431700	0.00195804	0.107999	0.229	0.173	1	Phloem	SORBI-3001G431700
SORBI-3009G052200	0.0019631	-0.149068	0.225	0.291	1	Phloem	SORBI-3009G052200
SORBI-3001G133900	0.00197883	-0.192923	0.32	0.37	1	Phloem	SORBI-3001G133900
Zm00001d038003	0.00198518	-0.223761	0.216	0.268	1	Phloem	SORBI-3009G100800
SORBI-3001G302600	0.00199691	-0.137075	0.14	0.202	1	Phloem	SORBI-3001G302600
SORBI-3003G292700	0.00200256	-0.103312	0.078	0.128	1	Phloem	SORBI-3003G292700
SORBI-3010G162800	0.002012	-0.143091	0.078	0.127	1	Phloem	SORBI-3010G162800
Zm00001d029422	0.00205641	-0.187729	0.284	0.35	1	Phloem	SORBI-3001G347500
SORBI-3007G118500	0.00209031	-0.123257	0.07	0.116	1	Phloem	SORBI-3007G118500
SORBI-3003G287500	0.00212547	-0.229866	0.373	0.415	1	Phloem	SORBI-3003G287500
SORBI-3004G337500	0.0021261	-0.245923	0.553	0.609	1	Phloem	SORBI-3004G337500
SORBI-3009G182300	0.00213939	-0.119415	0.25	0.309	1	Phloem	SORBI-3009G182300
Zm00001d022044	0.00215068	-0.135505	0.093	0.141	1	Phloem	SORBI-3002G363400
SORBI-3004G223000	0.00215651	-0.158	0.102	0.153	1	Phloem	SORBI-3004G223000
SORBI-3006G136400	0.0021584	-0.188986	0.066	0.109	1	Phloem	SORBI-3006G136400
Zm00001d010727	0.00218378	-0.122094	0.087	0.135	1	Phloem	SORBI-3009G194700
Zm00001d022106	0.00219501	-0.133358	0.248	0.316	1	Phloem	SORBI-3002G370500
SORBI-3001G349400	0.00219922	0.114611	0.203	0.152	1	Phloem	SORBI-3001G349400
Zm00001d007011	0.00220514	0.109609	0.604	0.575	1	Phloem	SORBI-3002G386500
SORBI-3003G194300	0.00222812	0.13191	0.337	0.268	1	Phloem	SORBI-3003G194300
Zm00001d002850	0.0022527	-0.12882	0.093	0.142	1	Phloem	SORBI-3006G157900
Zm00001d031561	0.0022582	-0.143592	0.066	0.11	1	Phloem	SORBI-3007G197700
SORBI-3005G108225	0.00229169	-0.136425	0.155	0.218	1	Phloem	SORBI-3005G108225
Zm00001d021021	0.00229213	-0.158338	0.256	0.31	1	Phloem	SORBI-3002G255400
SORBI-3001G047800	0.00230655	0.138248	0.691	0.688	1	Phloem	SORBI-3001G047800
SORBI-3001G165000	0.0023456	-0.150724	0.087	0.135	1	Phloem	SORBI-3001G165000
SORBI-3002G177000	0.002354	-0.114667	0.386	0.452	1	Phloem	SORBI-3002G177000
Zm00001d035038	0.0023553	-0.138942	0.797	0.801	1	Phloem	SORBI-3007G014700
Zm00001d014946	0.00236529	-0.115382	0.335	0.405	1	Phloem	SORBI-3004G004600
Zm00001d046039	0.00238065	-0.165809	0.117	0.171	1	Phloem	SORBI-3010G148932
SORBI-3007G032400	0.00241045	0.163345	0.129	0.09	1	Phloem	SORBI-3007G032400
Zm00001d044035	0.00241377	-0.128974	0.383	0.458	1	Phloem	SORBI-3003G239900
Zm00001d045042	0.00246921	-0.123717	0.549	0.572	1	Phloem	SORBI-3010G072300
SORBI-3004G055700	0.00247208	-0.14773	0.451	0.491	1	Phloem	SORBI-3004G055700
Zm00001d048503	0.00247867	0.147646	0.375	0.315	1	Phloem	SORBI-3001G532300
SORBI-3004G042000	0.00249636	-0.230892	0.534	0.56	1	Phloem	SORBI-3004G042000
SORBI-3005G003300	0.00252956	-0.125683	0.595	0.636	1	Phloem	SORBI-3005G003300
Zm00001d032823	0.00252961	-0.170205	0.07	0.115	1	Phloem	SORBI-3001G232200
Zm00001d027383	0.00253304	-0.150084	0.186	0.247	1	Phloem	SORBI-3001G530100
SORBI-3003G445200	0.00253441	-0.124543	0.15	0.205	1	Phloem	SORBI-3003G445200
Zm00001d017467	0.00260733	-0.208318	0.371	0.407	1	Phloem	SORBI-3004G296800
Zm00001d032565	0.00262714	-0.11854	0.081	0.129	1	Phloem	SORBI-3001G205000
SORBI-3003G250600	0.00267512	0.156363	0.369	0.313	1	Phloem	SORBI-3003G250600
Zm00001d052981	0.00268253	-0.133144	0.089	0.137	1	Phloem	SORBI-3005G168400
Zm00001d044016	0.00269387	-0.105795	0.167	0.227	1	Phloem	SORBI-3003G242000
Zm00001d046401	0.00270016	-0.102718	0.4	0.466	1	Phloem	SORBI-3010G184000
Zm00001d012127	0.00270154	0.121171	0.561	0.537	1	Phloem	SORBI-3003G395500
Zm00001d020134	0.00274165	-0.1433	0.119	0.165	1	Phloem	SORBI-3002G174000
Zm00001d012199	0.0027458	-0.125713	0.169	0.226	1	Phloem	SORBI-3003G381600
SORBI-3007G213400	0.00277812	-0.288995	0.6	0.62	1	Phloem	SORBI-3007G213400
Zm00001d002105	0.00278639	0.125955	0.456	0.405	1	Phloem	SORBI-3006G237200
Zm00001d022538	0.00279277	-0.102965	0.242	0.174	1	Phloem	SORBI-3002G423600
SORBI-3001G058900	0.00280698	-0.101527	0.837	0.809	1	Phloem	SORBI-3001G058900
SORBI-3001G498200	0.0028095	0.10002	0.686	0.634	1	Phloem	SORBI-3001G498200
Zm00001d044573	0.00281088	-0.10089	0.386	0.464	1	Phloem	SORBI-3003G179100
SORBI-3007G130800	0.00287318	-0.155035	0.381	0.431	1	Phloem	SORBI-3007G130800
Zm00001d003031	0.00288527	-0.101772	0.142	0.202	1	Phloem	SORBI-3006G143200
Zm00001d038841	0.00293319	-0.101329	0.22	0.283	1	Phloem	SORBI-3009G212600
SORBI-3006G085601	0.00295402	-0.104048	0.144	0.198	1	Phloem	SORBI-3006G085601
Zm00001d014722	0.00296553	-0.114852	0.117	0.167	1	Phloem	SORBI-3010G256600
SORBI-3006G081600	0.00296781	-0.183053	0.091	0.136	1	Phloem	SORBI-3006G081600
SORBI-3004G037200	0.00302021	-0.122563	0.123	0.174	1	Phloem	SORBI-3004G037200
SORBI-3001G336050	0.00304186	0.107268	0.828	0.823	1	Phloem	SORBI-3001G336050
SORBI-3004G042900	0.00307962	-0.136145	0.176	0.232	1	Phloem	SORBI-3004G042900
Zm00001d005334	0.00309018	-0.12119	0.655	0.68	1	Phloem	SORBI-3002G135200
Zm00001d031200	0.00310124	-0.106932	0.22	0.28	1	Phloem	SORBI-3008G186600
Zm00001d001881	0.00310256	-0.106998	0.102	0.15	1	Phloem	SORBI-3006G261700
Zm00001d032285	0.00311517	0.171872	0.163	0.12	1	Phloem	SORBI-3007G122500
Zm00001d002668	0.00311722	0.123189	0.11	0.074	1	Phloem	SORBI-3006G179000
Zm00001d026413	0.00312252	-0.152797	0.265	0.343	1	Phloem	SORBI-3006G235200
SORBI-3001G116500	0.00315338	0.120584	0.627	0.633	1	Phloem	SORBI-3001G116500
Zm00001d038476	0.00324304	-0.145386	0.117	0.169	1	Phloem	SORBI-3009G173700
SORBI-3004G086200	0.00325135	-0.117601	0.142	0.198	1	Phloem	SORBI-3004G086200
SORBI-3010G101800	0.00326164	-0.117712	0.263	0.326	1	Phloem	SORBI-3010G101800
Zm00001d037689	0.00330524	-0.421031	0.246	0.278	1	Phloem	SORBI-3009G069800
SORBI-3002G085700	0.00330892	-0.119108	0.15	0.209	1	Phloem	SORBI-3002G085700
SORBI-3006G163600	0.00331186	-0.14933	0.127	0.18	1	Phloem	SORBI-3006G163600
SORBI-3007G077100	0.00339066	0.183613	0.415	0.35	1	Phloem	SORBI-3007G077100
SORBI-3004G252900	0.00340849	0.111351	0.21	0.163	1	Phloem	SORBI-3004G252900
SORBI-3002G411600	0.00347745	-0.10669	0.216	0.28	1	Phloem	SORBI-3002G411600
SORBI-3001G304700	0.00350173	-0.470714	0.371	0.398	1	Phloem	SORBI-3001G304700
SORBI-3002G090200	0.00354758	0.326464	0.413	0.385	1	Phloem	SORBI-3002G090200
SORBI-3010G251100	0.0035585	-0.11077	0.784	0.783	1	Phloem	SORBI-3010G251100
Zm00001d043601	0.00357509	-0.177415	0.208	0.251	1	Phloem	SORBI-3003G280900
Zm00001d047787	0.00361235	-0.286038	0.593	0.659	1	Phloem	SORBI-3001G416800
Zm00001d039330	0.00362593	-0.146597	0.337	0.388	1	Phloem	SORBI-3003G013700
SORBI-3006G066600	0.0037767	-0.108052	0.305	0.368	1	Phloem	SORBI-3006G066600
SORBI-3004G009300	0.00379202	-0.159384	0.176	0.238	1	Phloem	SORBI-3004G009300
Zm00001d028375	0.00379711	0.116687	0.466	0.405	1	Phloem	SORBI-3001G441000
Zm00001d031817	0.00392234	-0.136518	0.136	0.187	1	Phloem	SORBI-3007G159200
Zm00001d001979	0.003945	-0.142593	0.496	0.537	1	Phloem	SORBI-3006G250900
SORBI-3003G301200	0.00396094	-0.130672	0.123	0.175	1	Phloem	SORBI-3003G301200
Zm00001d017729	0.00406898	-0.107903	0.18	0.239	1	Phloem	SORBI-3004G270200
SORBI-3007G050200	0.00414353	0.145435	0.328	0.274	1	Phloem	SORBI-3007G050200
SORBI-3001G069900	0.0041887	-0.153419	0.138	0.19	1	Phloem	SORBI-3001G069900
Zm00001d024048	0.00423187	-0.120806	0.256	0.318	1	Phloem	SORBI-3008G083400
Zm00001d014986	0.00430238	0.127794	0.22	0.17	1	Phloem	SORBI-3004G010900
SORBI-3004G092500	0.00430452	-0.148941	0.25	0.309	1	Phloem	SORBI-3004G092500
Zm00001d010337	0.00439161	-0.131277	0.093	0.14	1	Phloem	SORBI-3009G131900
SORBI-3009G070200	0.00444235	-0.106339	0.222	0.277	1	Phloem	SORBI-3009G070200
SORBI-3010G156100	0.00445722	-0.120281	0.239	0.297	1	Phloem	SORBI-3010G156100
Zm00001d008622	0.00451134	0.111025	0.354	0.299	1	Phloem	SORBI-3003G071600
SORBI-3008G098900	0.00452531	-0.141445	0.231	0.288	1	Phloem	SORBI-3008G098900
SORBI-3001G080100	0.00455478	-0.252725	0.114	0.157	1	Phloem	SORBI-3001G080100
SORBI-3004G218600	0.00456598	0.140317	0.557	0.509	1	Phloem	SORBI-3004G218600
SORBI-3001G116000	0.00456786	-0.130683	0.343	0.403	1	Phloem	SORBI-3001G116000
Zm00001d052651	0.00460637	-0.23528	0.123	0.171	1	Phloem	SORBI-3005G140001
SORBI-3004G050000	0.0046216	0.124746	0.528	0.485	1	Phloem	SORBI-3004G050000
SORBI-3009G174000	0.00466825	-0.105435	0.106	0.153	1	Phloem	SORBI-3009G174000
SORBI-3001G492300	0.00466872	-0.148353	0.278	0.331	1	Phloem	SORBI-3001G492300
Zm00001d028968	0.00467919	-0.44094	0.125	0.166	1	Phloem	SORBI-3001G387900
Zm00001d051600	0.00468193	-0.276899	0.485	0.537	1	Phloem	SORBI-3004G264300
Zm00001d047440	0.0047082	0.102272	0.148	0.108	1	Phloem	SORBI-3001G363400
SORBI-3004G205300	0.00472939	-0.136409	0.375	0.437	1	Phloem	SORBI-3004G205300
Zm00001d052209	0.00473454	0.136972	0.347	0.29	1	Phloem	SORBI-3004G229800
Zm00001d004730.1	0.00480422	-0.1501	0.203	0.271	1	Phloem	Zm00001d004730.1
SORBI-3007G083800	0.00486796	-0.123859	0.138	0.194	1	Phloem	SORBI-3007G083800
Zm00001d002186	0.00491357	-0.133415	0.083	0.127	1	Phloem	SORBI-3006G226200
Zm00001d028779	0.00491685	0.103685	0.212	0.164	1	Phloem	SORBI-3001G404200
Zm00001d029391	0.00500642	-0.117007	0.095	0.139	1	Phloem	SORBI-3001G351000
Zm00001d047220	0.00500989	0.108014	0.191	0.146	1	Phloem	SORBI-3001G350700
Zm00001d006766	0.0050536	-0.142783	0.725	0.722	1	Phloem	SORBI-3002G364100
Zm00001d029426	0.00510099	-0.177119	0.218	0.277	1	Phloem	SORBI-3001G347300
[truncated: 39,989 more rows]

## Sheet: Markers_Setaria
	p_val	avg_logFC	pct.1	pct.2	p_val_adj	cluster	gene
Zm00001d048799	0	1.13722	0.357	0.02	0	Phloem	Sevir.8G210600
Sevir.2G072300	3.34862e-225	1.4725	0.381	0.047	1.88798e-220	Phloem	Sevir.2G072300
Zm00001d008646	2.25602e-168	0.711176	0.118	0.004	1.27197e-163	Phloem	Sevir.5G108900
Zm00001d043144	8.48121e-162	0.404718	0.124	0.005	4.78179e-157	Phloem	Sevir.5G359900
Sevir.7G088800	1.43504e-155	0.739245	0.179	0.013	8.09092e-151	Phloem	Sevir.7G088800
Zm00001d040275	8.93744e-138	0.413335	0.124	0.006	5.03902e-133	Phloem	Sevir.5G058800
Zm00001d051611	1.03928e-124	0.456649	0.11	0.006	5.85957e-120	Phloem	Sevir.1G299300
Sevir.6G068100	9.2381e-94	1.33509	0.321	0.075	5.20853e-89	Phloem	Sevir.6G068100
Sevir.1G214500	1.71374e-85	0.958645	0.245	0.048	9.66226e-81	Phloem	Sevir.1G214500
Sevir.4G079700	2.72706e-85	0.94138	0.144	0.017	1.53754e-80	Phloem	Sevir.4G079700
Sevir.7G119800	1.60512e-65	0.375506	0.105	0.011	9.04983e-61	Phloem	Sevir.7G119800
Zm00001d005895	2.60481e-63	0.569571	0.138	0.02	1.46862e-58	Phloem	Sevir.2G240900
Sevir.2G209500	9.61161e-62	0.596777	0.168	0.031	5.41912e-57	Phloem	Sevir.2G209500
Sevir.3G180900	7.42169e-61	0.43888	0.112	0.014	4.18442e-56	Phloem	Sevir.3G180900
Zm00001d021965	1.18654e-60	0.57784	0.181	0.036	6.68984e-56	Phloem	Sevir.2G382500
Sevir.2G349000	8.54201e-60	0.82235	0.237	0.06	4.81607e-55	Phloem	Sevir.2G349000
Zm00001d027405	1.49774e-54	0.614292	0.195	0.045	8.44443e-50	Phloem	Sevir.9G566600
Sevir.3G268900	5.59912e-53	0.882929	0.107	0.015	3.15684e-48	Phloem	Sevir.3G268900
Zm00001d020794	8.17081e-51	0.909514	0.278	0.089	4.60678e-46	Phloem	Sevir.2G247800
Sevir.1G265400	2.98669e-47	0.797933	0.185	0.045	1.68393e-42	Phloem	Sevir.1G265400
Zm00001d014463	1.86138e-46	0.436952	0.116	0.02	1.04946e-41	Phloem	Sevir.4G273000
Zm00001d032410	6.45421e-41	0.441567	0.146	0.033	3.63895e-36	Phloem	Sevir.9G186500
Sevir.5G457400	9.28191e-38	1.46552	0.219	0.069	5.23324e-33	Phloem	Sevir.5G457400
Sevir.7G307700	1.21854e-37	0.42827	0.116	0.023	6.87027e-33	Phloem	Sevir.7G307700
Zm00001d027500	7.38632e-37	0.899125	0.489	0.28	4.16448e-32	Phloem	Sevir.9G558200
Zm00001d016470	1.49754e-31	0.528643	0.189	0.061	8.44329e-27	Phloem	Sevir.1G158500
Zm00001d003403	6.96889e-31	0.397642	0.101	0.021	3.92913e-26	Phloem	Sevir.7G133900
Zm00001d038476	1.69267e-30	0.55607	0.237	0.089	9.54343e-26	Phloem	Sevir.3G209800
Zm00001d020345	2.78708e-30	0.268694	0.101	0.021	1.57138e-25	Phloem	Sevir.2G201600
Sevir.3G198800	1.64544e-29	0.548274	0.16	0.048	9.27714e-25	Phloem	Sevir.3G198800
Sevir.7G323800	6.32171e-25	0.410705	0.215	0.083	3.56425e-20	Phloem	Sevir.7G323800
Zm00001d053404	1.23145e-23	0.548394	0.278	0.135	6.94302e-19	Phloem	Sevir.1G014400
Sevir.2G124000	2.71839e-23	0.572075	0.154	0.052	1.53266e-18	Phloem	Sevir.2G124000
Sevir.2G383000	1.48217e-22	0.39797	0.154	0.054	8.3566e-18	Phloem	Sevir.2G383000
Zm00001d042225	5.88373e-22	0.373981	0.138	0.046	3.31731e-17	Phloem	Sevir.5G448300
Zm00001d016691	2.46161e-21	0.434636	0.122	0.038	1.38788e-16	Phloem	Sevir.1G182400
Zm00001d009373	8.16495e-21	0.624605	0.235	0.108	4.60348e-16	Phloem	Sevir.5G194100
Sevir.7G161900	1.55239e-20	0.454458	0.298	0.154	8.75251e-16	Phloem	Sevir.7G161900
Sevir.3G304200	1.40551e-19	0.403945	0.168	0.066	7.92439e-15	Phloem	Sevir.3G304200
Sevir.2G261400	8.87698e-19	0.537879	0.669	0.577	5.00493e-14	Phloem	Sevir.2G261400
Sevir.6G031600	5.14727e-18	-0.467273	0.83	0.887	2.90208e-13	Phloem	Sevir.6G031600
Sevir.3G268700	5.3583e-18	1.75045	0.11	0.037	3.02106e-13	Phloem	Sevir.3G268700
Sevir.7G189600	9.95782e-18	0.4986	0.312	0.177	5.61432e-13	Phloem	Sevir.7G189600
Zm00001d052335	1.46755e-17	0.357556	0.158	0.063	8.27417e-13	Phloem	Sevir.8G014000
Sevir.7G118900	1.13856e-16	0.252888	0.105	0.034	6.41931e-12	Phloem	Sevir.7G118900
Sevir.8G230200	2.38181e-16	-0.545965	0.475	0.646	1.34289e-11	Phloem	Sevir.8G230200
Sevir.6G110000	2.68662e-16	0.41806	0.116	0.042	1.51474e-11	Phloem	Sevir.6G110000
Sevir.5G116300	3.66741e-15	0.363696	0.148	0.063	2.06772e-10	Phloem	Sevir.5G116300
Sevir.5G028800	3.82797e-15	-0.517323	0.15	0.317	2.15825e-10	Phloem	Sevir.5G028800
Sevir.5G419800	1.22002e-14	0.558658	0.185	0.092	6.87861e-10	Phloem	Sevir.5G419800
Zm00001d029937	6.8217e-14	0.233826	0.101	0.036	3.84614e-09	Phloem	Sevir.9G326900
Zm00001d043652	7.56729e-14	0.357721	0.13	0.054	4.26652e-09	Phloem	Sevir.5G299200
Sevir.2G264800	1.19868e-13	-0.397287	0.655	0.766	6.75826e-09	Phloem	Sevir.2G264800
Zm00001d003349	3.45409e-13	0.282367	0.116	0.047	1.94745e-08	Phloem	Sevir.7G140700
Sevir.3G039900	7.59296e-13	-0.180073	0.939	0.978	4.28099e-08	Phloem	Sevir.3G039900
Zm00001d027652	1.91976e-12	-0.316488	0.824	0.901	1.08238e-07	Phloem	Sevir.9G545800
Zm00001d017869	3.0507e-12	0.228123	0.116	0.048	1.72002e-07	Phloem	Sevir.1G305400
Zm00001d009702	6.31591e-12	0.392632	0.294	0.187	3.56097e-07	Phloem	Sevir.3G131500
Sevir.1G158000	6.84422e-12	0.240387	0.108	0.044	3.85884e-07	Phloem	Sevir.1G158000
Zm00001d020969	8.18753e-12	0.271667	0.158	0.076	4.61621e-07	Phloem	Sevir.2G268200
Sevir.8G221000	8.57588e-12	-0.4746	0.32	0.467	4.83517e-07	Phloem	Sevir.8G221000
Sevir.3G052900	1.2332e-11	0.325303	0.245	0.144	6.95293e-07	Phloem	Sevir.3G052900
Sevir.2G390400	1.79052e-11	0.24479	0.126	0.056	1.00951e-06	Phloem	Sevir.2G390400
Zm00001d035616	2.47233e-11	0.446836	0.471	0.375	1.39392e-06	Phloem	Sevir.3G063700
Sevir.9G269300	3.52276e-11	0.449028	0.211	0.119	1.98617e-06	Phloem	Sevir.9G269300
Zm00001d027855	4.28529e-11	-0.368217	0.302	0.461	2.41609e-06	Phloem	Sevir.9G528400
Zm00001d036690	4.4624e-11	-0.289241	0.101	0.228	2.51595e-06	Phloem	Sevir.4G200300
Sevir.3G269500	1.83404e-10	0.920982	0.107	0.046	1.03405e-05	Phloem	Sevir.3G269500
Sevir.2G409000	2.19597e-10	-0.335529	0.294	0.443	1.23811e-05	Phloem	Sevir.2G409000
Zm00001d021017	7.43309e-10	-0.277874	0.41	0.559	4.19085e-05	Phloem	Sevir.2G273100
Sevir.5G286200	9.2244e-10	-0.294868	0.254	0.405	5.20081e-05	Phloem	Sevir.5G286200
Sevir.4G127600	2.1082e-09	-0.340527	0.45	0.571	0.000118862	Phloem	Sevir.4G127600
Zm00001d053394	2.29067e-09	-0.221638	0.858	0.905	0.00012915	Phloem	Sevir.1G013400
Sevir.6G233600	2.88036e-09	-0.328537	0.473	0.608	0.000162398	Phloem	Sevir.6G233600
Zm00001d032461	2.97173e-09	-0.283316	0.312	0.456	0.000167549	Phloem	Sevir.9G193400
Zm00001d032876	4.06715e-09	-0.319777	0.162	0.282	0.00022931	Phloem	Sevir.9G241300
Sevir.7G239700	4.42926e-09	0.299338	0.195	0.113	0.000249726	Phloem	Sevir.7G239700
Sevir.9G332700	4.8635e-09	-0.328328	0.264	0.402	0.000274209	Phloem	Sevir.9G332700
Zm00001d047253	6.12764e-09	0.368078	0.327	0.236	0.000345482	Phloem	Sevir.9G377500
Sevir.5G314400	7.85992e-09	0.391357	0.16	0.088	0.00044315	Phloem	Sevir.5G314400
Sevir.4G066700	9.26808e-09	0.219023	0.337	0.233	0.000522544	Phloem	Sevir.4G066700
Zm00001d043234	9.34161e-09	0.346255	0.207	0.126	0.000526689	Phloem	Sevir.5G348800
Zm00001d032405	1.01251e-08	-0.236153	0.393	0.537	0.000570865	Phloem	Sevir.9G185300
Sevir.8G222900	1.25682e-08	-0.216986	0.594	0.722	0.000708607	Phloem	Sevir.8G222900
Sevir.8G230100	1.27032e-08	-0.428062	0.264	0.389	0.00071622	Phloem	Sevir.8G230100
Zm00001d010451	1.80872e-08	0.320859	0.25	0.164	0.00101977	Phloem	Sevir.3G077000
Sevir.8G223100	2.3912e-08	-0.266263	0.128	0.24	0.00134818	Phloem	Sevir.8G223100
Sevir.9G352000	2.46414e-08	-0.177612	0.884	0.926	0.00138931	Phloem	Sevir.9G352000
Zm00001d048795	3.33419e-08	0.320565	0.219	0.138	0.00187985	Phloem	Sevir.8G211300
Zm00001d003457	3.37678e-08	-0.262161	0.079	0.176	0.00190386	Phloem	Sevir.7G129700
Sevir.4G059400	4.09281e-08	-0.224937	0.396	0.539	0.00230757	Phloem	Sevir.4G059400
Zm00001d015421	4.35149e-08	0.218468	0.124	0.064	0.00245341	Phloem	Sevir.1G067500
Sevir.6G209800	4.39099e-08	0.301016	0.586	0.533	0.00247568	Phloem	Sevir.6G209800
Zm00001d047483	4.4783e-08	0.243904	0.166	0.094	0.00252491	Phloem	Sevir.9G409200
Sevir.3G017600	7.03557e-08	0.201812	0.14	0.075	0.00396673	Phloem	Sevir.3G017600
Sevir.5G124700	7.0708e-08	-0.256494	0.284	0.415	0.00398659	Phloem	Sevir.5G124700
Zm00001d002690	7.20698e-08	-0.367467	0.288	0.409	0.00406337	Phloem	Sevir.7G208600
Sevir.3G370100	7.35843e-08	-0.291073	0.085	0.18	0.00414876	Phloem	Sevir.3G370100
Sevir.9G363200	7.74137e-08	0.385742	0.349	0.272	0.00436466	Phloem	Sevir.9G363200
Sevir.9G182100	7.91267e-08	-0.220869	0.262	0.398	0.00446124	Phloem	Sevir.9G182100
Zm00001d027625	8.40108e-08	0.282286	0.172	0.102	0.00473661	Phloem	Sevir.9G548400
Sevir.5G287600	8.43393e-08	0.341246	0.381	0.297	0.00475514	Phloem	Sevir.5G287600
Sevir.2G412700	1.56833e-07	-0.245373	0.432	0.564	0.0088424	Phloem	Sevir.2G412700
Zm00001d029696	2.33826e-07	-0.185558	0.643	0.758	0.0131833	Phloem	Sevir.9G352700
Zm00001d010911	2.44747e-07	-0.24553	0.132	0.235	0.0137991	Phloem	Sevir.3G056100
Sevir.8G062700	2.63433e-07	-0.220109	0.191	0.308	0.0148526	Phloem	Sevir.8G062700
Zm00001d032823	2.64397e-07	-0.486054	0.256	0.365	0.014907	Phloem	Sevir.9G235000
Zm00001d040379	3.19597e-07	-0.310598	0.41	0.531	0.0180192	Phloem	Sevir.5G042100
Zm00001d027539	3.32181e-07	0.274728	0.122	0.066	0.0187287	Phloem	Sevir.9G554500
Zm00001d011921	3.61203e-07	-0.180465	0.075	0.164	0.020365	Phloem	Sevir.5G448200
Sevir.5G069600	4.48196e-07	-0.269627	0.156	0.259	0.0252697	Phloem	Sevir.5G069600
Sevir.9G351700	4.83905e-07	-0.184377	0.704	0.801	0.027283	Phloem	Sevir.9G351700
Zm00001d017725	4.89483e-07	-0.607864	0.12	0.21	0.0275975	Phloem	Sevir.1G291200
Sevir.3G191000	5.02434e-07	-0.223861	0.146	0.248	0.0283277	Phloem	Sevir.3G191000
Zm00001d053706	5.86817e-07	-0.228864	0.454	0.587	0.0330853	Phloem	Sevir.1G054700
Zm00001d003195	6.83175e-07	-0.23036	0.071	0.153	0.0385181	Phloem	Sevir.7G157900
Zm00001d017966	9.78918e-07	-0.22346	0.114	0.207	0.0551924	Phloem	Sevir.1G318300
Sevir.5G375900	1.07429e-06	-0.211512	0.061	0.137	0.0605696	Phloem	Sevir.5G375900
Sevir.5G148700	1.13491e-06	-0.265087	0.083	0.164	0.0639871	Phloem	Sevir.5G148700
Zm00001d041790	1.27383e-06	-0.181796	0.087	0.174	0.0718196	Phloem	Sevir.7G287200
Sevir.5G033600	1.28276e-06	-0.235642	0.499	0.628	0.072323	Phloem	Sevir.5G033600
Sevir.5G241800	1.2967e-06	-0.286676	0.183	0.282	0.0731095	Phloem	Sevir.5G241800
Sevir.9G047000	1.47229e-06	-0.18062	0.154	0.255	0.0830092	Phloem	Sevir.9G047000
Zm00001d015984	1.68377e-06	0.18262	0.112	0.061	0.0949324	Phloem	Sevir.1G122700
Sevir.4G277600	1.71469e-06	-0.201575	0.321	0.449	0.0966757	Phloem	Sevir.4G277600
Zm00001d043868	1.86523e-06	-0.246773	0.051	0.121	0.105163	Phloem	Sevir.5G273500
Zm00001d003457.1	1.93322e-06	-0.183832	0.037	0.103	0.108997	Phloem	Zm00001d003457.1
Sevir.9G351100	1.95662e-06	-0.227997	0.225	0.334	0.110316	Phloem	Sevir.9G351100
Zm00001d022616	2.07015e-06	-0.16498	0.726	0.795	0.116717	Phloem	Sevir.2G301900
Zm00001d001881	2.14982e-06	-0.179782	0.178	0.284	0.121209	Phloem	Sevir.3G021600
Sevir.8G094500	2.74858e-06	1.03168	0.103	0.055	0.154968	Phloem	Sevir.8G094500
Sevir.5G154300	2.76778e-06	0.211688	0.142	0.084	0.15605	Phloem	Sevir.5G154300
Zm00001d027925	2.81007e-06	-0.239564	0.217	0.321	0.158435	Phloem	Sevir.9G521100
Sevir.7G239000	3.20378e-06	-0.177693	0.103	0.19	0.180632	Phloem	Sevir.7G239000
Zm00001d039252	3.32661e-06	-0.193727	0.211	0.317	0.187558	Phloem	Sevir.5G001400
Zm00001d005253	4.05652e-06	-0.163613	0.617	0.746	0.22871	Phloem	Sevir.2G081700
Zm00001d038972	4.22099e-06	0.178626	0.152	0.092	0.237984	Phloem	Sevir.3G153100
Sevir.5G063300	4.26966e-06	-0.163248	0.083	0.164	0.240728	Phloem	Sevir.5G063300
Zm00001d007157	4.34384e-06	0.241912	0.154	0.097	0.24491	Phloem	Sevir.2G442400
Zm00001d044857	4.62456e-06	-0.201408	0.172	0.271	0.260738	Phloem	Sevir.4G092100
Sevir.2G161900	4.96975e-06	-0.168704	0.083	0.162	0.280199	Phloem	Sevir.2G161900
Zm00001d031677	5.81472e-06	-0.188422	0.288	0.411	0.32784	Phloem	Sevir.6G235000
Sevir.1G346600	6.29297e-06	-0.178062	0.353	0.477	0.354804	Phloem	Sevir.1G346600
Zm00001d027330	6.78447e-06	0.27608	0.211	0.143	0.382515	Phloem	Sevir.9G574300
Zm00001d038453	6.89112e-06	-0.168275	0.355	0.484	0.388528	Phloem	Sevir.3G211500
Zm00001d022510	6.89755e-06	-0.158241	0.108	0.193	0.388891	Phloem	Sevir.2G434300
Zm00001d014883	7.4167e-06	-0.165201	0.209	0.314	0.418161	Phloem	Sevir.4G301400
Sevir.3G082200	8.45849e-06	0.237757	0.134	0.081	0.476898	Phloem	Sevir.3G082200
Sevir.2G419300	8.66323e-06	-0.38617	0.15	0.23	0.488442	Phloem	Sevir.2G419300
Zm00001d018621	8.95004e-06	-0.232803	0.424	0.539	0.504612	Phloem	Sevir.2G001000
Sevir.7G130800	9.23807e-06	-0.180192	0.12	0.207	0.520852	Phloem	Sevir.7G130800
Zm00001d026684	9.35639e-06	0.179009	0.108	0.061	0.527523	Phloem	Sevir.3G004800
Zm00001d005391	9.59871e-06	-0.170949	0.166	0.259	0.541185	Phloem	Sevir.2G134100
Zm00001d022228	1.01343e-05	-0.256818	0.353	0.455	0.57138	Phloem	Sevir.2G412400
Sevir.1G146200	1.04343e-05	-0.215921	0.073	0.144	0.588297	Phloem	Sevir.1G146200
Zm00001d039297	1.10578e-05	-0.159494	0.124	0.211	0.623448	Phloem	Sevir.5G007700
Sevir.2G261100	1.13394e-05	0.430549	0.101	0.055	0.639326	Phloem	Sevir.2G261100
Sevir.9G068100	1.16217e-05	0.386592	0.14	0.088	0.655245	Phloem	Sevir.9G068100
Sevir.7G259000	1.16374e-05	-0.195972	0.045	0.106	0.65613	Phloem	Sevir.7G259000
Sevir.1G001000	1.18649e-05	-0.178573	0.079	0.152	0.668955	Phloem	Sevir.1G001000
Sevir.9G203300	1.22174e-05	-0.201695	0.174	0.269	0.688832	Phloem	Sevir.9G203300
Sevir.2G338300	1.2722e-05	0.298494	0.181	0.122	0.717278	Phloem	Sevir.2G338300
Zm00001d046234	1.31944e-05	-0.178008	0.17	0.265	0.743916	Phloem	Sevir.4G252300
Sevir.2G419100	1.47409e-05	-0.285271	0.142	0.224	0.831109	Phloem	Sevir.2G419100
Zm00001d022302	1.56173e-05	0.216457	0.174	0.114	0.880519	Phloem	Sevir.2G420400
Sevir.3G405400	1.72006e-05	0.123878	0.103	0.056	0.969787	Phloem	Sevir.3G405400
Sevir.3G021700	1.79251e-05	-0.192243	0.162	0.251	1	Phloem	Sevir.3G021700
Zm00001d047110	1.84076e-05	-0.173085	0.051	0.113	1	Phloem	Sevir.9G334800
Sevir.5G138300	1.99666e-05	0.16405	0.744	0.732	1	Phloem	Sevir.5G138300
Sevir.6G224100	1.99848e-05	-0.165589	0.258	0.372	1	Phloem	Sevir.6G224100
Zm00001d021709	2.40638e-05	-0.150719	0.509	0.622	1	Phloem	Sevir.2G354200
Sevir.3G304700	2.64056e-05	-0.200248	0.069	0.135	1	Phloem	Sevir.3G304700
Zm00001d005343	2.82815e-05	-0.14008	0.073	0.141	1	Phloem	Sevir.2G138600
Zm00001d003999	3.10549e-05	0.207581	0.116	0.07	1	Phloem	Sevir.7G076900
Zm00001d002163	3.15485e-05	-0.179348	0.174	0.262	1	Phloem	Sevir.7G264700
Sevir.7G159300	3.21569e-05	-0.176097	0.134	0.216	1	Phloem	Sevir.7G159300
Zm00001d018973	3.40103e-05	0.222794	0.231	0.164	1	Phloem	Sevir.2G061900
Zm00001d003488	3.48799e-05	-0.145424	0.187	0.281	1	Phloem	Sevir.7G127200
Sevir.7G055400	3.69484e-05	-0.168878	0.12	0.2	1	Phloem	Sevir.7G055400
Zm00001d002275	3.89485e-05	-0.166729	0.371	0.488	1	Phloem	Sevir.7G252600
Zm00001d042179	3.93857e-05	-0.167145	0.193	0.287	1	Phloem	Sevir.5G451900
Zm00001d015468	3.97107e-05	-0.182305	0.071	0.136	1	Phloem	Sevir.1G064400
Sevir.6G235100	3.98276e-05	-0.172665	0.292	0.402	1	Phloem	Sevir.6G235100
Zm00001d021443	4.21256e-05	-0.148082	0.061	0.123	1	Phloem	Sevir.2G309200
Zm00001d018135	4.24737e-05	-0.166639	0.152	0.236	1	Phloem	Sevir.1G335100
Zm00001d042936	4.41709e-05	-0.151962	0.513	0.635	1	Phloem	Sevir.5G379700
Sevir.2G136500	4.57858e-05	-0.143332	0.158	0.246	1	Phloem	Sevir.2G136500
Zm00001d045680	4.76796e-05	-0.178828	0.357	0.461	1	Phloem	Sevir.4G198700
Sevir.2G260900	4.82133e-05	-0.173889	0.097	0.167	1	Phloem	Sevir.2G260900
Zm00001d052651	4.92317e-05	-0.160045	0.055	0.114	1	Phloem	Sevir.8G151900
Zm00001d039636	4.96593e-05	-0.150964	0.089	0.16	1	Phloem	Sevir.5G121400
Sevir.9G540000	5.11033e-05	-0.291918	0.146	0.218	1	Phloem	Sevir.9G540000
Sevir.9G150500	5.23273e-05	0.502835	0.513	0.487	1	Phloem	Sevir.9G150500
Sevir.6G079800	5.29996e-05	0.107583	0.951	0.942	1	Phloem	Sevir.6G079800
Zm00001d018627	5.31521e-05	-0.206648	0.252	0.347	1	Phloem	Sevir.2G004300
Zm00001d014758	5.95462e-05	-0.154358	0.134	0.216	1	Phloem	Sevir.4G288700
Zm00001d011434	5.98195e-05	-0.384987	0.162	0.241	1	Phloem	Sevir.5G244400
Zm00001d010840	6.05331e-05	-0.190273	0.274	0.373	1	Phloem	Sevir.7G277500
Sevir.3G020100	6.22345e-05	0.21585	0.12	0.074	1	Phloem	Sevir.3G020100
Sevir.2G004100	6.29e-05	-0.17271	0.327	0.431	1	Phloem	Sevir.2G004100
Zm00001d042096	6.38336e-05	-0.147827	0.412	0.526	1	Phloem	Sevir.5G459400
Zm00001d016034	6.4124e-05	-0.606278	0.124	0.191	1	Phloem	Sevir.1G008300
Sevir.6G168900	6.7302e-05	-0.165727	0.053	0.11	1	Phloem	Sevir.6G168900
Zm00001d014887	6.85411e-05	-0.12349	0.86	0.91	1	Phloem	Sevir.4G301600
Sevir.7G267000	7.02928e-05	0.229367	0.355	0.298	1	Phloem	Sevir.7G267000
Sevir.2G365000	7.26399e-05	-0.125869	0.185	0.279	1	Phloem	Sevir.2G365000
Sevir.7G260100	7.37601e-05	-0.260543	0.203	0.292	1	Phloem	Sevir.7G260100
Sevir.9G540200	8.54057e-05	-0.164049	0.247	0.345	1	Phloem	Sevir.9G540200
Sevir.8G037700	9.11239e-05	-0.141519	0.071	0.133	1	Phloem	Sevir.8G037700
Sevir.1G004700	9.16895e-05	-0.1837	0.183	0.266	1	Phloem	Sevir.1G004700
Sevir.9G494500	9.56949e-05	-0.167736	0.168	0.25	1	Phloem	Sevir.9G494500
Zm00001d046357	9.59229e-05	0.172788	0.112	0.069	1	Phloem	Sevir.4G246300
Zm00001d038146	9.99976e-05	0.252033	0.31	0.252	1	Phloem	Sevir.3G255400
Sevir.1G274400	0.000104028	0.177943	0.15	0.099	1	Phloem	Sevir.1G274400
Sevir.5G395500	0.000118184	0.209109	0.13	0.082	1	Phloem	Sevir.5G395500
Sevir.5G296600	0.000123241	-0.128054	0.071	0.132	1	Phloem	Sevir.5G296600
Sevir.7G236700	0.000126004	-0.141268	0.241	0.332	1	Phloem	Sevir.7G236700
Zm00001d003395	0.000127224	-0.144745	0.268	0.367	1	Phloem	Sevir.7G134900
Sevir.9G483700	0.000141583	0.101945	0.653	0.599	1	Phloem	Sevir.9G483700
Zm00001d038192	0.000142159	-0.126128	0.083	0.147	1	Phloem	Sevir.3G248000
Zm00001d052835	0.000164812	-0.129494	0.132	0.209	1	Phloem	Sevir.6G201800
Zm00001d026642	0.000165099	-0.174722	0.197	0.279	1	Phloem	Sevir.3G013100
Zm00001d038351	0.000167643	-0.130803	0.58	0.68	1	Phloem	Sevir.3G226300
Sevir.5G353000	0.000168324	-0.130955	0.144	0.221	1	Phloem	Sevir.5G353000
Sevir.8G218100	0.000172683	-0.12998	0.079	0.14	1	Phloem	Sevir.8G218100
Zm00001d051041	0.000178645	-0.101573	0.105	0.176	1	Phloem	Sevir.1G230000
Sevir.1G067200	0.000178651	-0.115955	0.065	0.122	1	Phloem	Sevir.1G067200
Zm00001d043083	0.00018296	-0.124383	0.146	0.226	1	Phloem	Sevir.5G365300
Zm00001d022506	0.000186149	-0.142063	0.185	0.273	1	Phloem	Sevir.2G434500
Zm00001d018322	0.000190379	-0.120172	0.063	0.119	1	Phloem	Sevir.1G351800
Sevir.7G139500	0.000201384	-0.130494	0.108	0.174	1	Phloem	Sevir.7G139500
Sevir.5G314500	0.000202765	-0.103429	0.181	0.271	1	Phloem	Sevir.5G314500
Zm00001d024178	0.000208569	-0.15501	0.434	0.538	1	Phloem	Sevir.6G103000
Zm00001d021506	0.000213984	-0.114511	0.049	0.101	1	Phloem	Sevir.2G327200
Zm00001d043335	0.000220768	0.213143	0.197	0.146	1	Phloem	Sevir.5G335100
Sevir.4G121600	0.000224436	-0.2115	0.16	0.231	1	Phloem	Sevir.4G121600
Sevir.7G300400	0.000227193	-0.132024	0.649	0.738	1	Phloem	Sevir.7G300400
Zm00001d049881	0.00022901	-0.14692	0.231	0.318	1	Phloem	Sevir.6G259800
Zm00001d042962	0.000230547	-0.124429	0.093	0.156	1	Phloem	Sevir.5G377400
Zm00001d028572	0.000239047	-0.148354	0.213	0.3	1	Phloem	Sevir.9G463400
Sevir.7G290900	0.000241927	-0.14006	0.361	0.469	1	Phloem	Sevir.7G290900
Sevir.7G305900	0.000246525	0.154123	0.781	0.768	1	Phloem	Sevir.7G305900
Zm00001d043018	0.000252045	-0.116254	0.112	0.182	1	Phloem	Sevir.5G371500
Sevir.3G220100	0.000260069	-0.199412	0.89	0.919	1	Phloem	Sevir.3G220100
Zm00001d010825	0.00026141	-0.123169	0.071	0.128	1	Phloem	Sevir.7G281300
Zm00001d022092	0.000262433	0.217813	0.191	0.141	1	Phloem	Sevir.2G391000
Sevir.9G510300	0.000276655	-0.192942	0.069	0.123	1	Phloem	Sevir.9G510300
Sevir.6G231600	0.000278268	-0.117129	0.29	0.389	1	Phloem	Sevir.6G231600
Zm00001d017095	0.000294407	-0.145965	0.089	0.149	1	Phloem	Sevir.1G222200
Sevir.9G430300	0.000296608	-0.138215	0.101	0.164	1	Phloem	Sevir.9G430300
Sevir.6G034200	0.000307961	-0.136674	0.258	0.35	1	Phloem	Sevir.6G034200
Sevir.9G350700	0.000309183	-0.123557	0.069	0.125	1	Phloem	Sevir.9G350700
Zm00001d021668	0.000312742	0.50424	0.444	0.405	1	Phloem	Sevir.2G348300
Sevir.9G322600	0.000322347	-0.12019	0.308	0.412	1	Phloem	Sevir.9G322600
Sevir.6G103700	0.000339742	-0.121173	0.268	0.363	1	Phloem	Sevir.6G103700
Zm00001d042842	0.000345841	-0.145537	0.164	0.239	1	Phloem	Sevir.5G389400
Sevir.9G234500	0.000375537	-0.102202	0.905	0.931	1	Phloem	Sevir.9G234500
Zm00001d007234	0.00037669	-0.103941	0.795	0.864	1	Phloem	Sevir.2G456100
Zm00001d048954	0.000376852	-0.149565	0.316	0.415	1	Phloem	Sevir.8G178400
Zm00001d015973	0.000377118	-0.131773	0.179	0.258	1	Phloem	Sevir.1G127200
Sevir.3G347300	0.000383873	-0.105788	0.284	0.377	1	Phloem	Sevir.3G347300
Sevir.2G369000	0.000384042	0.160341	0.584	0.548	1	Phloem	Sevir.2G369000
Zm00001d039264	0.000389363	-0.118812	0.087	0.147	1	Phloem	Sevir.5G003700
Zm00001d011717	0.000391909	-0.113002	0.15	0.224	1	Phloem	Sevir.5G297600
Zm00001d038724	0.000395923	-0.139087	0.162	0.235	1	Phloem	Sevir.3G181400
Sevir.5G260300	0.000407044	-0.119259	0.505	0.604	1	Phloem	Sevir.5G260300
Zm00001d043731	0.000407764	-0.153129	0.073	0.126	1	Phloem	Sevir.5G288500
Sevir.1G056600	0.00040829	-0.152292	0.209	0.292	1	Phloem	Sevir.1G056600
Sevir.9G309800	0.000411581	-0.184791	0.142	0.21	1	Phloem	Sevir.9G309800
Sevir.5G154500	0.000412856	0.197664	0.195	0.143	1	Phloem	Sevir.5G154500
Zm00001d029499	0.000420492	0.103645	0.12	0.077	1	Phloem	Sevir.9G370900
Sevir.8G126200	0.00042484	-0.123185	0.13	0.197	1	Phloem	Sevir.8G126200
Zm00001d038598	0.000426677	-0.220663	0.207	0.28	1	Phloem	Sevir.3G194800
Sevir.4G181200	0.000445726	-0.25344	0.118	0.179	1	Phloem	Sevir.4G181200
Sevir.2G444900	0.000446405	-0.107347	0.083	0.14	1	Phloem	Sevir.2G444900
Zm00001d016463	0.000458534	-0.112901	0.359	0.463	1	Phloem	Sevir.1G157300
Sevir.4G253700	0.000462719	-0.125055	0.714	0.777	1	Phloem	Sevir.4G253700
Sevir.9G116100	0.000475887	-0.109918	0.091	0.151	1	Phloem	Sevir.9G116100
Zm00001d046742	0.000490188	-0.136833	0.14	0.206	1	Phloem	Sevir.4G224900
Zm00001d027535	0.000503112	-0.108122	0.067	0.12	1	Phloem	Sevir.9G555000
Sevir.9G234700	0.000509553	-0.138321	0.907	0.935	1	Phloem	Sevir.9G234700
Zm00001d034701	0.000511321	-0.102649	0.103	0.166	1	Phloem	Sevir.9G028000
Zm00001d048416	0.000513692	-0.143575	0.077	0.131	1	Phloem	Sevir.9G540700
Sevir.9G089900	0.000515594	-0.130802	0.333	0.431	1	Phloem	Sevir.9G089900
Zm00001d038718	0.000519359	-0.104184	0.172	0.249	1	Phloem	Sevir.3G181600
Sevir.7G247400	0.000519552	0.258185	0.162	0.117	1	Phloem	Sevir.7G247400
Zm00001d032815	0.000525846	-0.101264	0.181	0.266	1	Phloem	Sevir.9G233900
Zm00001d046593	0.000534427	-0.107377	0.075	0.129	1	Phloem	Sevir.4G210600
Sevir.5G400900	0.000542781	0.139187	0.108	0.069	1	Phloem	Sevir.5G400900
Sevir.9G101900	0.000554401	-0.122743	0.112	0.174	1	Phloem	Sevir.9G101900
Sevir.4G237200	0.00055449	0.136264	0.108	0.069	1	Phloem	Sevir.4G237200
Sevir.3G328600	0.000564879	-0.158758	0.223	0.303	1	Phloem	Sevir.3G328600
Sevir.7G160500	0.000572374	0.129325	0.124	0.082	1	Phloem	Sevir.7G160500
Zm00001d014611	0.000581161	-0.115496	0.103	0.163	1	Phloem	Sevir.4G259300
Zm00001d038164	0.000582268	0.179944	0.103	0.065	1	Phloem	Sevir.3G252500
Zm00001d018194	0.000588073	-0.1081	0.28	0.374	1	Phloem	Sevir.1G339600
Sevir.7G295200	0.000591582	-0.124255	0.189	0.265	1	Phloem	Sevir.7G295200
Sevir.6G011700	0.000595798	-0.117051	0.436	0.53	1	Phloem	Sevir.6G011700
Sevir.7G004900	0.000599382	-0.218526	0.195	0.268	1	Phloem	Sevir.7G004900
Zm00001d043520	0.000614279	-0.136589	0.081	0.134	1	Phloem	Sevir.5G314600
Sevir.7G159600	0.000622302	-0.136642	0.134	0.201	1	Phloem	Sevir.7G159600
Sevir.4G297400	0.000629473	-0.107915	0.087	0.144	1	Phloem	Sevir.4G297400
Zm00001d046460	0.000641387	-0.130121	0.15	0.22	1	Phloem	Sevir.4G238300
Sevir.9G000100	0.000647692	-0.113987	0.154	0.228	1	Phloem	Sevir.9G000100
Zm00001d043650	0.000654386	-0.115034	0.136	0.202	1	Phloem	Sevir.5G300100
Zm00001d009445	0.00065736	0.186408	0.406	0.362	1	Phloem	Sevir.3G164000
Sevir.9G056400	0.000663636	0.200647	0.112	0.073	1	Phloem	Sevir.9G056400
Sevir.2G407200	0.000676536	0.174395	0.247	0.194	1	Phloem	Sevir.2G407200
Sevir.8G257200	0.000688464	-0.102145	0.126	0.194	1	Phloem	Sevir.8G257200
Sevir.5G385400	0.000696516	-0.114669	0.093	0.151	1	Phloem	Sevir.5G385400
Sevir.4G196200	0.000701471	-0.129253	0.438	0.535	1	Phloem	Sevir.4G196200
Sevir.7G322400	0.000704322	-0.100676	0.103	0.164	1	Phloem	Sevir.7G322400
Sevir.9G471600	0.000707332	-0.112468	0.3	0.397	1	Phloem	Sevir.9G471600
Sevir.1G245000	0.000707951	-0.14054	0.138	0.204	1	Phloem	Sevir.1G245000
Zm00001d037018	0.000709724	-0.136417	0.381	0.471	1	Phloem	Sevir.4G142400
Sevir.7G224300	0.000712782	-0.120714	0.136	0.204	1	Phloem	Sevir.7G224300
Zm00001d016588	0.000715209	-0.144411	0.15	0.217	1	Phloem	Sevir.1G174600
Zm00001d014039	0.00073049	-0.110925	0.101	0.159	1	Phloem	Sevir.9G223200
Zm00001d046004	0.000741158	-0.13373	0.122	0.187	1	Phloem	Sevir.4G159600
Zm00001d028375	0.000741266	-0.114396	0.254	0.344	1	Phloem	Sevir.9G477700
Zm00001d032536	0.000743102	-0.136642	0.233	0.312	1	Phloem	Sevir.9G201400
Zm00001d017802	0.000745753	-0.12082	0.148	0.215	1	Phloem	Sevir.1G297200
Sevir.2G315800	0.000746272	-0.10562	0.3	0.395	1	Phloem	Sevir.2G315800
Zm00001d048551	0.000751846	-0.1291	0.146	0.213	1	Phloem	Sevir.9G581700
Sevir.7G227000	0.000751947	-0.133449	0.108	0.168	1	Phloem	Sevir.7G227000
Zm00001d018284	0.000755961	-0.10802	0.095	0.153	1	Phloem	Sevir.1G347400
Zm00001d045218	0.00076417	-0.10165	0.108	0.171	1	Phloem	Sevir.4G060100
Zm00001d050201	0.000777972	-0.153618	0.491	0.584	1	Phloem	Sevir.6G012500
Zm00001d034319	0.000780581	-0.128424	0.203	0.28	1	Phloem	Sevir.9G067600
Sevir.1G353600	0.000785714	-0.194543	0.089	0.144	1	Phloem	Sevir.1G353600
Zm00001d020400	0.00081692	-0.152514	0.288	0.372	1	Phloem	Sevir.2G207000
Sevir.3G033700	0.000826045	-0.142923	0.692	0.771	1	Phloem	Sevir.3G033700
Sevir.5G241900	0.000886816	-0.181989	0.245	0.321	1	Phloem	Sevir.5G241900
Zm00001d003271.1	0.000901435	-0.112518	0.428	0.536	1	Phloem	Zm00001d003271.1
Zm00001d029599	0.000937213	0.2189	0.17	0.125	1	Phloem	Sevir.9G362100
Sevir.1G271800	0.000944001	0.684722	0.146	0.104	1	Phloem	Sevir.1G271800
Sevir.5G386600	0.000962872	-0.100587	0.075	0.127	1	Phloem	Sevir.5G386600
Zm00001d033112	0.000979467	-0.107108	0.081	0.133	1	Phloem	Sevir.9G176500
Zm00001d011903	0.000981356	-0.105472	0.089	0.145	1	Phloem	Sevir.5G452200
Zm00001d032947	0.000986755	-0.140052	0.245	0.325	1	Phloem	Sevir.9G266200
Zm00001d018529	0.00099713	-0.102655	0.085	0.138	1	Phloem	Sevir.1G382400
Zm00001d006502	0.00100505	-0.102638	0.079	0.131	1	Phloem	Sevir.2G344300
Zm00001d035034	0.00100602	-0.105457	0.065	0.114	1	Phloem	Sevir.6G008300
Zm00001d029747	0.00102827	0.193719	0.475	0.442	1	Phloem	Sevir.9G346700
Zm00001d032114	0.0010338	-0.118618	0.296	0.389	1	Phloem	Sevir.6G173000
Sevir.4G293700	0.00104759	-0.101259	0.536	0.637	1	Phloem	Sevir.4G293700
Zm00001d037333	0.00105632	-0.105999	0.154	0.225	1	Phloem	Sevir.4G115300
Sevir.2G416300	0.00110726	-0.281096	0.252	0.33	1	Phloem	Sevir.2G416300
Sevir.5G048600	0.00111393	-0.139152	0.201	0.274	1	Phloem	Sevir.5G048600
Zm00001d039532	0.00113463	-0.159101	0.12	0.178	1	Phloem	Sevir.5G130400
Sevir.3G042700	0.00114005	-0.117276	0.085	0.137	1	Phloem	Sevir.3G042700
Sevir.5G294800	0.00114456	-0.108015	0.207	0.286	1	Phloem	Sevir.5G294800
Zm00001d003659	0.00122632	-0.100302	0.097	0.152	1	Phloem	Sevir.7G108300
Sevir.5G432900	0.00123167	-0.104113	0.284	0.375	1	Phloem	Sevir.5G432900
Zm00001d008546	0.00126757	-0.108608	0.249	0.333	1	Phloem	Sevir.5G087600
Zm00001d024497	0.00128703	0.152869	0.101	0.066	1	Phloem	Sevir.6G046800
Sevir.1G264300	0.00129875	-0.191226	0.832	0.875	1	Phloem	Sevir.1G264300
Zm00001d020401	0.00132818	-0.199069	0.227	0.302	1	Phloem	Sevir.2G207100
Sevir.9G147300	0.00133982	-0.144485	0.227	0.3	1	Phloem	Sevir.9G147300
Sevir.9G335300	0.00135565	-0.185018	0.394	0.485	1	Phloem	Sevir.9G335300
Sevir.3G078600	0.00136708	-0.103602	0.093	0.147	1	Phloem	Sevir.3G078600
Sevir.9G081700	0.00138564	-0.124823	0.726	0.798	1	Phloem	Sevir.9G081700
Zm00001d037298	0.0014055	-0.103721	0.093	0.148	1	Phloem	Sevir.4G195600
Zm00001d048655	0.00140839	-0.131056	0.191	0.257	1	Phloem	Sevir.8G247400
Sevir.5G247800	0.00142172	-0.125435	0.233	0.309	1	Phloem	Sevir.5G247800
Sevir.1G103100	0.00145271	-0.160205	0.079	0.129	1	Phloem	Sevir.1G103100
Sevir.2G128000	0.00149972	-0.162361	0.722	0.804	1	Phloem	Sevir.2G128000
Sevir.3G250700	0.00151506	-0.115698	0.122	0.181	1	Phloem	Sevir.3G250700
Zm00001d024778	0.00151907	-0.313372	0.339	0.419	1	Phloem	Sevir.3G056200
Zm00001d038065	0.00154553	0.210519	0.333	0.283	1	Phloem	Sevir.3G266900
Sevir.3G017800	0.00158935	0.161399	0.148	0.107	1	Phloem	Sevir.3G017800
Zm00001d048987	0.00159189	-0.105435	0.067	0.114	1	Phloem	Sevir.8G083800
Zm00001d025984	0.00168825	-0.137853	0.195	0.268	1	Phloem	Sevir.7G196400
Zm00001d009024	0.00169598	-0.114229	0.217	0.29	1	Phloem	Sevir.5G003800
Zm00001d004463	0.00171271	0.155802	0.118	0.082	1	Phloem	Sevir.7G038400
Zm00001d002085	0.00171883	-0.117202	0.146	0.21	1	Phloem	Sevir.7G273600
Zm00001d035775	0.00173733	-0.110292	0.083	0.134	1	Phloem	Sevir.3G119200
Sevir.6G106400	0.00173823	-0.152347	0.095	0.147	1	Phloem	Sevir.6G106400
Sevir.9G552000	0.00177052	-0.100771	0.059	0.103	1	Phloem	Sevir.9G552000
Zm00001d028368.1	0.00177555	-0.116013	0.164	0.23	1	Phloem	Zm00001d028368.1
Sevir.5G237800	0.00181456	-0.111457	0.075	0.122	1	Phloem	Sevir.5G237800
Sevir.9G450400	0.001827	-0.109237	0.085	0.135	1	Phloem	Sevir.9G450400
Sevir.6G013600	0.00185587	0.179415	0.179	0.136	1	Phloem	Sevir.6G013600
Sevir.6G256500	0.00186385	-0.100957	0.089	0.14	1	Phloem	Sevir.6G256500
Sevir.1G039300	0.00188016	-0.124036	0.095	0.144	1	Phloem	Sevir.1G039300
Sevir.7G188300	0.00188843	-0.123125	0.097	0.15	1	Phloem	Sevir.7G188300
Zm00001d025846	0.00189081	-0.115557	0.27	0.357	1	Phloem	Sevir.7G173300
Sevir.1G099000	0.00190728	0.159671	0.105	0.07	1	Phloem	Sevir.1G099000
Sevir.2G156400	0.00191254	0.150715	0.11	0.076	1	Phloem	Sevir.2G156400
Zm00001d016274	0.00191914	-0.11926	0.178	0.243	1	Phloem	Sevir.1G028900
Zm00001d002105	0.00192291	-0.108886	0.371	0.456	1	Phloem	Sevir.7G270800
Sevir.9G529500	0.00192505	0.178323	0.156	0.114	1	Phloem	Sevir.9G529500
Sevir.1G145200	0.00194502	-0.10764	0.079	0.128	1	Phloem	Sevir.1G145200
Sevir.7G224400	0.00195158	-0.133165	0.574	0.671	1	Phloem	Sevir.7G224400
Zm00001d003164	0.0019629	-0.104099	0.17	0.235	1	Phloem	Sevir.7G161500
Sevir.1G380300	0.00196318	-0.101046	0.134	0.194	1	Phloem	Sevir.1G380300
Zm00001d015308	0.00203613	-0.100114	0.081	0.129	1	Phloem	Sevir.1G079300
Zm00001d033805	0.00211616	-0.103071	0.268	0.35	1	Phloem	Sevir.9G111900
Sevir.8G243400	0.00212092	-0.11441	0.207	0.277	1	Phloem	Sevir.8G243400
Sevir.4G080000	0.00214752	-0.100812	0.108	0.162	1	Phloem	Sevir.4G080000
Sevir.2G003800	0.00215059	-0.116175	0.229	0.303	1	Phloem	Sevir.2G003800
Sevir.5G154200	0.00216039	0.181272	0.122	0.086	1	Phloem	Sevir.5G154200
Zm00001d020442	0.00220103	-0.132207	0.112	0.167	1	Phloem	Sevir.2G211200
Sevir.9G024100	0.00221079	-0.164677	0.108	0.161	1	Phloem	Sevir.9G024100
Sevir.4G292400	0.00222164	-0.10716	0.596	0.689	1	Phloem	Sevir.4G292400
Sevir.3G387300	0.0022585	-0.10369	0.069	0.115	1	Phloem	Sevir.3G387300
Sevir.8G075900	0.00228474	-0.210186	0.108	0.16	1	Phloem	Sevir.8G075900
Sevir.1G184100	0.00231809	-0.125603	0.063	0.106	1	Phloem	Sevir.1G184100
Sevir.2G242600	0.00235045	0.111187	0.101	0.067	1	Phloem	Sevir.2G242600
Sevir.6G193700	0.00236716	0.145076	0.531	0.505	1	Phloem	Sevir.6G193700
Zm00001d033727	0.00242434	-0.101871	0.099	0.15	1	Phloem	Sevir.9G117900
Sevir.5G005900	0.00242781	-0.15917	0.083	0.13	1	Phloem	Sevir.5G005900
Sevir.2G202700	0.00246293	0.141118	0.103	0.069	1	Phloem	Sevir.2G202700
Sevir.5G310800	0.00246793	-0.182726	0.256	0.327	1	Phloem	Sevir.5G310800
Sevir.1G116100	0.00249331	-0.125775	0.566	0.649	1	Phloem	Sevir.1G116100
Sevir.3G226600	0.00250814	0.138798	0.126	0.09	1	Phloem	Sevir.3G226600
Sevir.4G180900	0.00253171	-0.236324	0.164	0.22	1	Phloem	Sevir.4G180900
Sevir.6G249600	0.00270471	-0.100757	0.071	0.116	1	Phloem	Sevir.6G249600
Sevir.2G058700	0.0027313	-0.111846	0.099	0.149	1	Phloem	Sevir.2G058700
Sevir.4G266700	0.00277456	0.143273	0.88	0.887	1	Phloem	Sevir.4G266700
Sevir.3G324700	0.0027835	-0.15274	0.408	0.496	1	Phloem	Sevir.3G324700
Zm00001d050224	0.00279622	-0.104458	0.075	0.12	1	Phloem	Sevir.6G093500
Zm00001d016708	0.00281444	-0.106614	0.26	0.34	1	Phloem	Sevir.1G184800
Sevir.7G268300	0.00286097	0.157665	0.219	0.171	1	Phloem	Sevir.7G268300
Zm00001d002601	0.00288701	0.147166	0.6	0.592	1	Phloem	Sevir.7G219100
Sevir.6G009700	0.00294332	0.142166	0.385	0.338	1	Phloem	Sevir.6G009700
Zm00001d019089	0.00295985	-0.111228	0.101	0.151	1	Phloem	Sevir.2G073800
Sevir.7G053200	0.00300779	-0.10693	0.221	0.293	1	Phloem	Sevir.7G053200
Sevir.7G174300	0.00301483	-0.107229	0.079	0.124	1	Phloem	Sevir.7G174300
Sevir.9G336200	0.00303084	-0.123664	0.16	0.222	1	Phloem	Sevir.9G336200
Sevir.1G145100	0.00307344	-0.116676	0.197	0.266	1	Phloem	Sevir.1G145100
Sevir.9G391300	0.00316822	-0.102798	0.359	0.46	1	Phloem	Sevir.9G391300
Zm00001d052209	0.00331478	-0.144488	0.178	0.246	1	Phloem	Sevir.1G332400
Zm00001d039079	0.00344934	-0.121102	0.42	0.509	1	Phloem	Sevir.3G140900
Sevir.9G522500	0.00355649	0.254875	0.174	0.132	1	Phloem	Sevir.9G522500
Sevir.2G286400	0.00364654	-0.101918	0.146	0.205	1	Phloem	Sevir.2G286400
Zm00001d011097	0.00371742	-0.130541	0.428	0.512	1	Phloem	Sevir.3G072500
Sevir.9G187300	0.0037325	-0.115602	0.148	0.208	1	Phloem	Sevir.9G187300
Sevir.7G216000	0.00384988	0.119919	0.118	0.083	1	Phloem	Sevir.7G216000
Sevir.8G221900	0.00386713	-0.110315	0.223	0.293	1	Phloem	Sevir.8G221900
Sevir.5G168700	0.00388785	-0.129406	0.586	0.669	1	Phloem	Sevir.5G168700
Sevir.3G133500	0.0038942	-0.105092	0.101	0.148	1	Phloem	Sevir.3G133500
Sevir.7G235400	0.00392382	-0.105047	0.116	0.168	1	Phloem	Sevir.7G235400
Sevir.1G001300	0.00396018	-0.109512	0.264	0.341	1	Phloem	Sevir.1G001300
Sevir.1G353500	0.00397043	-0.113747	0.11	0.161	1	Phloem	Sevir.1G353500
Sevir.4G268500	0.00403578	-0.100791	0.178	0.24	1	Phloem	Sevir.4G268500
Zm00001d009566	0.0041065	-0.125358	0.609	0.693	1	Phloem	Sevir.3G149000
Sevir.4G154400	0.00420783	-0.100212	0.158	0.216	1	Phloem	Sevir.4G154400
Zm00001d044446	0.004259	-0.101567	0.179	0.242	1	Phloem	Sevir.5G229300
Zm00001d050805	0.00432012	-0.174246	0.085	0.128	1	Phloem	Sevir.1G200000
Zm00001d012042	0.0044207	0.158142	0.556	0.553	1	Phloem	Sevir.5G434400
Sevir.5G266800	0.00442702	-0.143583	0.107	0.155	1	Phloem	Sevir.5G266800
Sevir.9G247300	0.0044787	-0.106817	0.412	0.497	1	Phloem	Sevir.9G247300
Sevir.J011100	0.00456385	-0.184779	0.26	0.321	1	Phloem	Sevir.J011100
Sevir.2G143100	0.00468856	-0.10004	0.375	0.462	1	Phloem	Sevir.2G143100
Sevir.4G224400	0.00471606	-0.102384	0.146	0.2	1	Phloem	Sevir.4G224400
Sevir.6G224200	0.00479871	-0.134052	0.621	0.69	1	Phloem	Sevir.6G224200
Sevir.7G204500	0.00499386	-0.199985	0.089	0.133	1	Phloem	Sevir.7G204500
Sevir.5G169300	0.00501723	0.162955	0.402	0.366	1	Phloem	Sevir.5G169300
Zm00001d029454	0.00502822	-0.102994	0.172	0.23	1	Phloem	Sevir.9G375700
Sevir.9G076300	0.00504187	0.251425	0.112	0.079	1	Phloem	Sevir.9G076300
Sevir.5G028400	0.00506452	-0.195311	0.3	0.363	1	Phloem	Sevir.5G028400
Sevir.2G042300	0.00512077	-0.120989	0.414	0.495	1	Phloem	Sevir.2G042300
Sevir.7G159900	0.00515741	-0.106092	0.099	0.145	1	Phloem	Sevir.7G159900
Sevir.9G351600	0.00528742	-0.13888	0.11	0.158	1	Phloem	Sevir.9G351600
Zm00001d033104	0.00537449	0.128233	0.122	0.088	1	Phloem	Sevir.9G177000
Zm00001d005356	0.00538878	0.136686	0.15	0.114	1	Phloem	Sevir.2G136800
Sevir.5G472300	0.00547011	-0.100108	0.061	0.101	1	Phloem	Sevir.5G472300
Sevir.8G027600	0.00547896	-0.138812	0.073	0.116	1	Phloem	Sevir.8G027600
Zm00001d047787	0.00564906	-0.128021	0.696	0.753	1	Phloem	Sevir.9G453900
Zm00001d032821	0.00576658	-0.146193	0.602	0.669	1	Phloem	Sevir.9G234600
Sevir.8G179000	0.00576704	-0.121588	0.355	0.432	1	Phloem	Sevir.8G179000
Zm00001d012378	0.00588799	-0.117463	0.118	0.167	1	Phloem	Sevir.5G388400
Sevir.6G165100	0.00614692	0.118058	0.105	0.073	1	Phloem	Sevir.6G165100
Sevir.9G351800	0.00647395	-0.101844	0.183	0.245	1	Phloem	Sevir.9G351800
Zm00001d049560	0.0065059	-0.114221	0.256	0.328	1	Phloem	Sevir.6G056700
Sevir.9G234400	0.00654743	-0.11741	0.901	0.926	1	Phloem	Sevir.9G234400
Sevir.4G243900	0.00686091	-0.106564	0.065	0.103	1	Phloem	Sevir.4G243900
Zm00001d002342	0.00722573	0.160923	0.148	0.113	1	Phloem	Sevir.7G246000
Zm00001d037252	0.00751548	0.15147	0.134	0.1	1	Phloem	Sevir.4G104700
Sevir.9G067900	0.00753498	0.150156	0.316	0.276	1	Phloem	Sevir.9G067900
Sevir.6G013800	0.00840556	0.218012	0.179	0.14	1	Phloem	Sevir.6G013800
Zm00001d050864	0.00841745	-0.254436	0.408	0.478	1	Phloem	Sevir.1G209300
Sevir.3G238300	0.00867466	0.11333	0.112	0.082	1	Phloem	Sevir.3G238300
Zm00001d019560.1	0.00870377	0.128797	0.189	0.15	1	Phloem	Zm00001d019560.1
Sevir.9G552600	0.00884709	0.191981	0.458	0.444	1	Phloem	Sevir.9G552600
Zm00001d046676	0.00930199	-0.100487	0.337	0.412	1	Phloem	Sevir.4G218200
Sevir.9G323200	0.00933102	-0.109845	0.107	0.152	1	Phloem	Sevir.9G323200
Zm00001d044744	0.00950873	0.151033	0.154	0.119	1	Phloem	Sevir.4G108900
Zm00001d017240	0.00976328	-0.110258	0.12	0.167	1	Phloem	Sevir.1G240900
Sevir.2G431400	0	1.18024	0.39	0.036	0	Young_Phloem	Sevir.2G431400
Sevir.7G323800.1	8.90727e-301	1.30572	0.449	0.066	5.02201e-296	Young_Phloem	Sevir.7G323800
Zm00001d038296	1.01226e-280	0.919366	0.249	0.018	5.70725e-276	Young_Phloem	Sevir.3G229900
Zm00001d043361	1.29138e-184	0.672277	0.202	0.019	7.28092e-180	Young_Phloem	Sevir.5G332000
Zm00001d032578	1.76475e-181	0.603719	0.181	0.015	9.94984e-177	Young_Phloem	Sevir.9G204900
Sevir.7G118900.1	7.15488e-180	0.611395	0.227	0.025	4.03399e-175	Young_Phloem	Sevir.7G118900
Zm00001d016155	3.59137e-171	0.804526	0.347	0.067	2.02485e-166	Young_Phloem	Sevir.1G019600
Zm00001d038065.1	3.21432e-135	0.893557	0.625	0.264	1.81226e-130	Young_Phloem	Sevir.3G266900
Zm00001d045097	5.12408e-117	0.509152	0.169	0.022	2.88901e-112	Young_Phloem	Sevir.4G045600
Zm00001d009494	3.45674e-115	0.891128	0.219	0.038	1.94894e-110	Young_Phloem	Sevir.3G157300
Zm00001d027500.1	2.25417e-114	1.04495	0.589	0.269	1.27093e-109	Young_Phloem	Sevir.9G558200
Zm00001d046134	2.86389e-108	0.396416	0.149	0.018	1.61469e-103	Young_Phloem	Sevir.4G138100
Zm00001d029752	3.98036e-108	0.722911	0.324	0.086	2.24417e-103	Young_Phloem	Sevir.9G346200
Sevir.3G017400	9.20384e-99	1.30946	0.507	0.226	5.18921e-94	Young_Phloem	Sevir.3G017400
Sevir.1G367900	1.66657e-95	0.470603	0.159	0.024	9.39627e-91	Young_Phloem	Sevir.1G367900
Zm00001d030577	5.44058e-92	0.430729	0.145	0.021	3.06745e-87	Young_Phloem	Sevir.6G133000
Sevir.9G149600	1.25393e-84	0.644178	0.146	0.023	7.06979e-80	Young_Phloem	Sevir.9G149600
Zm00001d028680	4.38043e-82	0.407373	0.161	0.028	2.46973e-77	Young_Phloem	Sevir.9G452300
Zm00001d015984.1	3.38043e-79	0.593535	0.221	0.053	1.90592e-74	Young_Phloem	Sevir.1G122700
Sevir.9G269300.1	1.97032e-76	0.691691	0.325	0.11	1.11089e-71	Young_Phloem	Sevir.9G269300
Zm00001d015421.1	6.87959e-62	0.442532	0.211	0.058	3.87878e-57	Young_Phloem	Sevir.1G067500
Zm00001d032287	2.83114e-61	0.427819	0.129	0.024	1.59623e-56	Young_Phloem	Sevir.6G143700
Zm00001d027625.1	5.24749e-60	0.488291	0.277	0.094	2.95859e-55	Young_Phloem	Sevir.9G548400
Sevir.1G251000	8.72238e-60	0.437604	0.194	0.051	4.91776e-55	Young_Phloem	Sevir.1G251000
Sevir.8G120500	3.07055e-59	0.543158	0.229	0.069	1.7312e-54	Young_Phloem	Sevir.8G120500
Sevir.7G184200	3.09133e-58	0.470889	0.223	0.066	1.74292e-53	Young_Phloem	Sevir.7G184200
Sevir.5G116300.1	4.59759e-58	0.484994	0.206	0.058	2.59217e-53	Young_Phloem	Sevir.5G116300
Zm00001d013796	6.90647e-57	0.49789	0.203	0.058	3.89393e-52	Young_Phloem	Sevir.9G177900
Zm00001d009702.1	9.80118e-56	0.622998	0.391	0.179	5.526e-51	Young_Phloem	Sevir.3G131500
Sevir.3G304200.1	4.99029e-52	0.3832	0.207	0.062	2.81357e-47	Young_Phloem	Sevir.3G304200
Zm00001d041965	1.6628e-51	0.430609	0.191	0.056	9.37501e-47	Young_Phloem	Sevir.5G473600
Sevir.1G147800	7.24372e-50	0.305126	0.126	0.027	4.08408e-45	Young_Phloem	Sevir.1G147800
Sevir.1G158700	3.46625e-47	0.268329	0.103	0.02	1.95431e-42	Young_Phloem	Sevir.1G158700
Sevir.1G271700	6.37175e-47	0.474798	0.39	0.186	3.59245e-42	Young_Phloem	Sevir.1G271700
Zm00001d003999.1	1.39184e-44	0.365284	0.198	0.064	7.84732e-40	Young_Phloem	Sevir.7G076900
Sevir.9G032600	1.82133e-43	0.344158	0.132	0.033	1.02688e-38	Young_Phloem	Sevir.9G032600
Zm00001d021965.1	8.95603e-42	0.394231	0.136	0.036	5.0495e-37	Young_Phloem	Sevir.2G382500
Sevir.6G031600.1	5.11287e-40	-0.552992	0.816	0.889	2.88269e-35	Young_Phloem	Sevir.6G031600
Sevir.3G039900.1	1.18535e-38	-0.259757	0.966	0.977	6.6831e-34	Young_Phloem	Sevir.3G039900
Sevir.9G479800	4.56847e-37	0.337701	0.157	0.049	2.57575e-32	Young_Phloem	Sevir.9G479800
Sevir.1G214500.1	4.74391e-37	0.356043	0.157	0.049	2.67467e-32	Young_Phloem	Sevir.1G214500
Zm00001d038972.1	5.25471e-37	0.414347	0.223	0.087	2.96266e-32	Young_Phloem	Sevir.3G153100
Zm00001d027652.1	1.9787e-36	-0.460632	0.829	0.903	1.11561e-31	Young_Phloem	Sevir.9G545800
Sevir.5G138800	6.01946e-35	0.310196	0.141	0.043	3.39383e-30	Young_Phloem	Sevir.5G138800
Sevir.1G177800	6.8332e-35	0.842692	0.383	0.214	3.85263e-30	Young_Phloem	Sevir.1G177800
Sevir.7G239700.1	6.05675e-33	0.383604	0.249	0.108	3.41486e-28	Young_Phloem	Sevir.7G239700
Sevir.6G209800.1	6.84505e-33	0.448651	0.685	0.526	3.85931e-28	Young_Phloem	Sevir.6G209800
Sevir.4G066700.1	5.61809e-31	0.520276	0.397	0.228	3.16753e-26	Young_Phloem	Sevir.4G066700
Sevir.6G165100.1	1.66722e-29	0.426859	0.175	0.068	9.39998e-25	Young_Phloem	Sevir.6G165100
Zm00001d009373.1	1.93665e-29	0.522325	0.232	0.106	1.0919e-24	Young_Phloem	Sevir.5G194100
Sevir.9G373100	7.1165e-29	0.518293	0.132	0.044	4.01235e-24	Young_Phloem	Sevir.9G373100
Zm00001d044584	3.18012e-28	0.230308	0.109	0.032	1.79298e-23	Young_Phloem	Sevir.5G191300
Zm00001d014613	3.85029e-28	0.39877	0.486	0.314	2.17083e-23	Young_Phloem	Sevir.4G259000
Zm00001d040056	4.71148e-28	0.295092	0.136	0.046	2.65638e-23	Young_Phloem	Sevir.5G081600
Sevir.3G057800	6.40319e-28	0.368041	0.235	0.108	3.61018e-23	Young_Phloem	Sevir.3G057800
Sevir.9G483700.1	7.49265e-28	0.377923	0.743	0.592	4.22443e-23	Young_Phloem	Sevir.9G483700
Sevir.7G101800	1.45582e-27	0.305805	0.194	0.08	8.20805e-23	Young_Phloem	Sevir.7G101800
Sevir.3G266800	4.71336e-27	0.317128	0.169	0.065	2.65744e-22	Young_Phloem	Sevir.3G266800
Sevir.1G251100	6.88168e-27	0.278224	0.137	0.048	3.87996e-22	Young_Phloem	Sevir.1G251100
Sevir.7G267200	9.50752e-27	0.271375	0.104	0.031	5.36043e-22	Young_Phloem	Sevir.7G267200
Sevir.9G543800	2.96565e-26	0.318418	0.117	0.038	1.67206e-21	Young_Phloem	Sevir.9G543800
Sevir.2G383000.1	8.54284e-26	0.268106	0.144	0.053	4.81654e-21	Young_Phloem	Sevir.2G383000
Sevir.2G261400.1	1.76916e-25	0.374608	0.7	0.574	9.9747e-21	Young_Phloem	Sevir.2G261400
Zm00001d047483.1	7.17579e-25	0.353436	0.203	0.091	4.04578e-20	Young_Phloem	Sevir.9G409200
Sevir.9G234700.1	2.75083e-24	-0.230852	0.924	0.934	1.55095e-19	Young_Phloem	Sevir.9G234700
Zm00001d041941	1.9634e-23	0.218739	0.105	0.034	1.10698e-18	Young_Phloem	Sevir.5G476700
Zm00001d018080	2.05462e-23	0.402832	0.352	0.208	1.15841e-18	Young_Phloem	Sevir.1G329400
Sevir.2G264800.1	1.43885e-22	-0.401642	0.676	0.767	8.11237e-18	Young_Phloem	Sevir.2G264800
Sevir.9G352000.1	1.68608e-22	-0.265905	0.872	0.928	9.50631e-18	Young_Phloem	Sevir.9G352000
Sevir.4G111500	1.9329e-22	0.251228	0.165	0.069	1.08979e-17	Young_Phloem	Sevir.4G111500
Sevir.3G288700	2.70977e-22	0.340837	0.461	0.308	1.5278e-17	Young_Phloem	Sevir.3G288700
Sevir.9G475500	7.5923e-22	0.248674	0.157	0.065	4.28061e-17	Young_Phloem	Sevir.9G475500
Sevir.5G336400	7.71812e-22	0.308381	0.15	0.062	4.35156e-17	Young_Phloem	Sevir.5G336400
Zm00001d043234.1	9.10379e-22	0.302738	0.241	0.122	5.13281e-17	Young_Phloem	Sevir.5G348800
Sevir.7G161900.1	3.1454e-21	0.323361	0.281	0.152	1.77341e-16	Young_Phloem	Sevir.7G161900
Zm00001d038476.1	3.33421e-21	0.337914	0.191	0.089	1.87986e-16	Young_Phloem	Sevir.3G209800
Zm00001d026010	1.14917e-20	0.262097	0.125	0.048	6.47913e-16	Young_Phloem	Sevir.7G223700
Zm00001d029599.1	1.53543e-20	0.331373	0.232	0.121	8.65691e-16	Young_Phloem	Sevir.9G362100
Sevir.6G231800	1.64547e-19	0.40236	0.282	0.166	9.2773e-15	Young_Phloem	Sevir.6G231800
Sevir.6G243800	1.75597e-19	0.268087	0.158	0.07	9.90033e-15	Young_Phloem	Sevir.6G243800
Zm00001d049166	2.11648e-19	0.235194	0.209	0.104	1.19329e-14	Young_Phloem	Sevir.8G131800
Sevir.9G234500.1	4.74398e-19	-0.193019	0.92	0.93	2.6747e-14	Young_Phloem	Sevir.9G234500
Sevir.8G182400	8.56427e-19	0.257606	0.148	0.064	4.82862e-14	Young_Phloem	Sevir.8G182400
Sevir.6G054800	9.92136e-19	0.270094	0.121	0.048	5.59376e-14	Young_Phloem	Sevir.6G054800
Zm00001d017728	1.19062e-18	0.27279	0.109	0.042	6.71283e-14	Young_Phloem	Sevir.1G291800
Zm00001d029696.1	1.92655e-18	-0.270313	0.659	0.759	1.08621e-13	Young_Phloem	Sevir.9G352700
Sevir.1G265400.1	2.08796e-18	0.21691	0.119	0.047	1.17721e-13	Young_Phloem	Sevir.1G265400
Sevir.6G233600.1	2.59271e-18	-0.410018	0.473	0.61	1.46179e-13	Young_Phloem	Sevir.6G233600
Sevir.5G054300	3.08332e-18	0.314075	0.269	0.152	1.73841e-13	Young_Phloem	Sevir.5G054300
Zm00001d052335.1	3.94839e-18	0.213355	0.144	0.062	2.22614e-13	Young_Phloem	Sevir.8G014000
Sevir.9G332700.1	4.3346e-18	-0.405213	0.254	0.405	2.44389e-13	Young_Phloem	Sevir.9G332700
Sevir.8G230200.1	4.51916e-18	-0.544128	0.518	0.647	2.54795e-13	Young_Phloem	Sevir.8G230200
Zm00001d023979	5.06197e-18	0.306813	0.191	0.096	2.85399e-13	Young_Phloem	Sevir.3G096100
Zm00001d008905	5.75885e-18	0.258273	0.148	0.066	3.2469e-13	Young_Phloem	Sevir.5G145000
Sevir.2G399500	2.02655e-17	0.340171	0.375	0.254	1.14259e-12	Young_Phloem	Sevir.2G399500
Sevir.4G112100	2.02732e-17	0.260954	0.132	0.057	1.14302e-12	Young_Phloem	Sevir.4G112100
Zm00001d016662	3.01096e-17	0.240465	0.105	0.041	1.69761e-12	Young_Phloem	Sevir.1G180200
Zm00001d033794	6.85205e-17	0.271122	0.119	0.049	3.86326e-12	Young_Phloem	Sevir.9G113200
Sevir.8G221000.1	7.3238e-17	-0.487669	0.336	0.469	4.12923e-12	Young_Phloem	Sevir.8G221000
Sevir.5G154500.1	1.34904e-16	0.297637	0.245	0.139	7.60601e-12	Young_Phloem	Sevir.5G154500
Zm00001d053394.1	3.13245e-16	-0.248677	0.881	0.905	1.7661e-11	Young_Phloem	Sevir.1G013400
Zm00001d021017.1	3.39497e-16	-0.33554	0.433	0.561	1.91412e-11	Young_Phloem	Sevir.2G273100
Zm00001d003349.1	5.3275e-16	0.235272	0.111	0.046	3.0037e-11	Young_Phloem	Sevir.7G140700
Sevir.9G230400	6.53273e-16	0.196704	0.13	0.058	3.68322e-11	Young_Phloem	Sevir.9G230400
Sevir.7G265400	7.56776e-16	0.291355	0.186	0.097	4.26678e-11	Young_Phloem	Sevir.7G265400
Sevir.5G048900	9.29297e-16	0.245292	0.116	0.05	5.23947e-11	Young_Phloem	Sevir.5G048900
Zm00001d053706.1	1.52374e-15	-0.285798	0.453	0.589	8.59098e-11	Young_Phloem	Sevir.1G054700
Sevir.2G412700.1	1.77449e-15	-0.330394	0.433	0.566	1.00047e-10	Young_Phloem	Sevir.2G412700
Zm00001d027855.1	4.88605e-15	-0.3503	0.331	0.463	2.7548e-10	Young_Phloem	Sevir.9G528400
Zm00001d019125	5.80569e-15	0.191603	0.126	0.057	3.27331e-10	Young_Phloem	Sevir.2G080200
Sevir.5G287600.1	9.16186e-15	0.244236	0.415	0.293	5.16555e-10	Young_Phloem	Sevir.5G287600
Sevir.5G033600.1	1.42951e-14	-0.308006	0.505	0.63	8.05973e-10	Young_Phloem	Sevir.5G033600
Zm00001d040379.1	1.53308e-14	-0.376906	0.418	0.533	8.64367e-10	Young_Phloem	Sevir.5G042100
Sevir.9G234400.1	1.61129e-14	-0.221008	0.914	0.925	9.08464e-10	Young_Phloem	Sevir.9G234400
Sevir.6G052800	3.12753e-14	0.248862	0.236	0.138	1.76333e-09	Young_Phloem	Sevir.6G052800
Sevir.5G069600.1	3.88999e-14	-0.38705	0.141	0.262	2.19321e-09	Young_Phloem	Sevir.5G069600
Zm00001d021336	5.08196e-14	0.231906	0.196	0.109	2.86526e-09	Young_Phloem	Sevir.2G323100
Sevir.5G274100	5.47598e-14	0.184794	0.109	0.047	3.08741e-09	Young_Phloem	Sevir.5G274100
Sevir.4G109700	5.54634e-14	0.256994	0.204	0.115	3.12708e-09	Young_Phloem	Sevir.4G109700
Sevir.7G078000	1.33461e-13	0.165138	0.117	0.053	7.52466e-09	Young_Phloem	Sevir.7G078000
Sevir.2G405600	2.82611e-13	0.211964	0.125	0.059	1.59339e-08	Young_Phloem	Sevir.2G405600
Zm00001d032876.1	4.04845e-13	-0.329208	0.165	0.285	2.28256e-08	Young_Phloem	Sevir.9G241300
Zm00001d017869.1	4.2166e-13	0.170237	0.107	0.047	2.37736e-08	Young_Phloem	Sevir.1G305400
Sevir.2G433100	5.12142e-13	0.292588	0.502	0.39	2.88751e-08	Young_Phloem	Sevir.2G433100
Sevir.1G346600.1	7.3829e-13	-0.284239	0.36	0.479	4.16255e-08	Young_Phloem	Sevir.1G346600
Sevir.4G253700.1	7.64353e-13	-0.259491	0.708	0.778	4.3095e-08	Young_Phloem	Sevir.4G253700
Zm00001d002095	8.17543e-13	0.211524	0.108	0.049	4.60939e-08	Young_Phloem	Sevir.7G271800
Sevir.2G242600.1	8.68453e-13	0.167452	0.132	0.064	4.89642e-08	Young_Phloem	Sevir.2G242600
Zm00001d027411	8.97888e-13	0.244427	0.179	0.1	5.06238e-08	Young_Phloem	Sevir.9G566300
Sevir.7G081400	9.37681e-13	0.185725	0.112	0.052	5.28674e-08	Young_Phloem	Sevir.7G081400
Zm00001d034356	9.80555e-13	-0.205398	0.95	0.966	5.52847e-08	Young_Phloem	Sevir.9G063900
Zm00001d010855	1.05478e-12	0.124874	0.335	0.224	5.94696e-08	Young_Phloem	Sevir.3G037500
Zm00001d026684.1	1.09651e-12	0.221043	0.123	0.059	6.18224e-08	Young_Phloem	Sevir.3G004800
Zm00001d032968	1.12612e-12	0.287391	0.27	0.176	6.34917e-08	Young_Phloem	Sevir.9G264600
Sevir.7G130800.1	1.36763e-12	-0.277837	0.103	0.21	7.71085e-08	Young_Phloem	Sevir.7G130800
Sevir.2G416700	1.80071e-12	-0.339493	0.75	0.823	1.01526e-07	Young_Phloem	Sevir.2G416700
Zm00001d012675	2.03344e-12	-0.207636	0.751	0.823	1.14647e-07	Young_Phloem	Sevir.5G332100
Sevir.2G124000.1	2.03723e-12	0.196336	0.113	0.052	1.14861e-07	Young_Phloem	Sevir.2G124000
Zm00001d024178.1	2.41374e-12	-0.266152	0.416	0.541	1.36089e-07	Young_Phloem	Sevir.6G103000
Sevir.9G309800.1	2.66752e-12	-0.339333	0.108	0.213	1.50398e-07	Young_Phloem	Sevir.9G309800
Sevir.1G357500	3.92956e-12	0.183494	0.115	0.054	2.21553e-07	Young_Phloem	Sevir.1G357500
Zm00001d032821.1	4.33835e-12	-0.255481	0.584	0.671	2.446e-07	Young_Phloem	Sevir.9G234600
Sevir.9G234300	4.51294e-12	-0.292336	0.436	0.548	2.54444e-07	Young_Phloem	Sevir.9G234300
Zm00001d003195.1	6.68602e-12	-0.276844	0.063	0.155	3.76965e-07	Young_Phloem	Sevir.7G157900
Zm00001d045680.1	9.03658e-12	-0.290535	0.35	0.464	5.09492e-07	Young_Phloem	Sevir.4G198700
Zm00001d031677.1	1.07255e-11	-0.359641	0.296	0.413	6.04717e-07	Young_Phloem	Sevir.6G235000
Sevir.9G182100.1	1.22621e-11	-0.249666	0.273	0.4	6.91348e-07	Young_Phloem	Sevir.9G182100
Sevir.9G540000.1	2.01049e-11	-0.351307	0.121	0.221	1.13353e-06	Young_Phloem	Sevir.9G540000
Sevir.5G048600.1	3.91907e-11	-0.261414	0.165	0.278	2.20961e-06	Young_Phloem	Sevir.5G048600
Sevir.4G237200.1	4.72793e-11	0.177879	0.129	0.067	2.66565e-06	Young_Phloem	Sevir.4G237200
Zm00001d022506.1	5.03629e-11	-0.241998	0.165	0.276	2.83951e-06	Young_Phloem	Sevir.2G434500
Sevir.2G004100.1	5.04392e-11	-0.300066	0.321	0.433	2.84381e-06	Young_Phloem	Sevir.2G004100
Sevir.5G376400	5.7697e-11	0.239901	0.155	0.087	3.25302e-06	Young_Phloem	Sevir.5G376400
Zm00001d032461.1	6.90309e-11	-0.274605	0.347	0.457	3.89203e-06	Young_Phloem	Sevir.9G193400
Zm00001d013276	7.10668e-11	0.185291	0.129	0.067	4.00682e-06	Young_Phloem	Sevir.9G091500
Zm00001d018627.1	7.66358e-11	-0.334423	0.237	0.35	4.3208e-06	Young_Phloem	Sevir.2G004300
Sevir.6G255800	7.73302e-11	0.226201	0.265	0.173	4.35996e-06	Young_Phloem	Sevir.6G255800
Zm00001d052842.1	8.61212e-11	0.260369	0.477	0.381	4.8556e-06	Young_Phloem	Zm00001d052842.1
Sevir.3G328600.1	9.24038e-11	-0.246132	0.188	0.307	5.20982e-06	Young_Phloem	Sevir.3G328600
Sevir.4G243900.1	1.30056e-10	-0.244831	0.033	0.106	7.33267e-06	Young_Phloem	Sevir.4G243900
Sevir.2G102400	1.32055e-10	0.260296	0.445	0.346	7.44537e-06	Young_Phloem	Sevir.2G102400
Sevir.6G233000	1.92261e-10	0.190057	0.187	0.111	1.08399e-05	Young_Phloem	Sevir.6G233000
Zm00001d028998	2.06473e-10	0.221933	0.63	0.548	1.16411e-05	Young_Phloem	Sevir.9G421700
Sevir.8G222900.1	2.14109e-10	-0.226826	0.642	0.722	1.20717e-05	Young_Phloem	Sevir.8G222900
Sevir.5G168700.1	2.57953e-10	-0.227371	0.59	0.671	1.45436e-05	Young_Phloem	Sevir.5G168700
Zm00001d037018.1	2.77749e-10	-0.234933	0.354	0.475	1.56597e-05	Young_Phloem	Sevir.4G142400
Zm00001d044857.1	3.09832e-10	-0.292707	0.171	0.273	1.74686e-05	Young_Phloem	Sevir.4G092100
Sevir.3G220100.1	3.13586e-10	-0.244075	0.903	0.919	1.76803e-05	Young_Phloem	Sevir.3G220100
Sevir.5G286200.1	4.95043e-10	-0.299678	0.295	0.406	2.7911e-05	Young_Phloem	Sevir.5G286200
Sevir.9G351700.1	5.0419e-10	-0.176629	0.738	0.801	2.84267e-05	Young_Phloem	Sevir.9G351700
Sevir.1G019500	6.38097e-10	0.229287	0.31	0.221	3.59766e-05	Young_Phloem	Sevir.1G019500
Zm00001d002690.1	6.52655e-10	-0.376972	0.308	0.41	3.67973e-05	Young_Phloem	Sevir.7G208600
Zm00001d020400.1	6.72451e-10	-0.293583	0.271	0.375	3.79135e-05	Young_Phloem	Sevir.2G207000
Sevir.2G407200.1	6.84136e-10	0.181029	0.282	0.191	3.85723e-05	Young_Phloem	Sevir.2G407200
Sevir.8G223100.1	8.03325e-10	-0.255631	0.145	0.242	4.52923e-05	Young_Phloem	Sevir.8G223100
Sevir.3G405400.1	1.1959e-09	0.20398	0.108	0.055	6.74259e-05	Young_Phloem	Sevir.3G405400
Sevir.5G241800.1	1.24282e-09	-0.327822	0.187	0.284	7.00712e-05	Young_Phloem	Sevir.5G241800
Zm00001d010911.1	1.65104e-09	-0.239406	0.14	0.237	9.30875e-05	Young_Phloem	Sevir.3G056100
Sevir.1G335300	1.7413e-09	0.161908	0.134	0.074	9.81763e-05	Young_Phloem	Sevir.1G335300
Zm00001d022228.1	1.74894e-09	-0.289263	0.365	0.457	9.86071e-05	Young_Phloem	Sevir.2G412400
Zm00001d016708.1	2.21603e-09	-0.32266	0.237	0.343	0.000124942	Young_Phloem	Sevir.1G184800
Sevir.4G277600.1	2.49198e-09	-0.237099	0.337	0.451	0.0001405	Young_Phloem	Sevir.4G277600
Sevir.9G476200	2.8785e-09	0.157961	0.25	0.165	0.000162293	Young_Phloem	Sevir.9G476200
Zm00001d016470.1	2.93572e-09	0.188487	0.117	0.063	0.000165519	Young_Phloem	Sevir.1G158500
Zm00001d002342.1	3.08626e-09	0.181509	0.182	0.111	0.000174006	Young_Phloem	Sevir.7G246000
Zm00001d050201.1	3.96423e-09	-0.236436	0.501	0.586	0.000223507	Young_Phloem	Sevir.6G012500
Zm00001d032405.1	4.6437e-09	-0.231923	0.444	0.537	0.000261816	Young_Phloem	Sevir.9G185300
Sevir.2G453200	5.24624e-09	0.185367	0.13	0.073	0.000295788	Young_Phloem	Sevir.2G453200
Sevir.2G409000.1	5.41024e-09	-0.284143	0.343	0.443	0.000305035	Young_Phloem	Sevir.2G409000
Sevir.5G028800.1	5.80912e-09	-0.39193	0.224	0.315	0.000327524	Young_Phloem	Sevir.5G028800
Zm00001d035616.1	6.66905e-09	0.243138	0.455	0.374	0.000376008	Young_Phloem	Sevir.3G063700
Sevir.4G083600	7.40671e-09	0.138904	0.111	0.058	0.000417597	Young_Phloem	Sevir.4G083600
Sevir.9G081700.1	8.06018e-09	-0.1752	0.744	0.798	0.000454441	Young_Phloem	Sevir.9G081700
Zm00001d046778	9.20066e-09	0.1391	0.12	0.065	0.000518742	Young_Phloem	Sevir.4G228300
Zm00001d003309	1.02975e-08	0.207488	0.25	0.172	0.000580581	Young_Phloem	Sevir.7G144900
Sevir.3G052900.1	1.18774e-08	0.19763	0.219	0.144	0.000669662	Young_Phloem	Sevir.3G052900
Sevir.1G323500	1.2037e-08	0.217089	0.448	0.354	0.000678656	Young_Phloem	Sevir.1G323500
Sevir.3G220400	1.29633e-08	-0.203323	0.914	0.922	0.000730883	Young_Phloem	Sevir.3G220400
Sevir.6G224200.1	1.37337e-08	-0.210636	0.614	0.692	0.00077432	Young_Phloem	Sevir.6G224200
Sevir.6G009700.1	1.38234e-08	0.207348	0.422	0.335	0.000779376	Young_Phloem	Sevir.6G009700
Sevir.4G127600.1	1.47658e-08	-0.29312	0.486	0.571	0.000832511	Young_Phloem	Sevir.4G127600
Sevir.2G305000	1.53751e-08	0.177863	0.123	0.069	0.000866862	Young_Phloem	Sevir.2G305000
Sevir.4G180900.1	1.83995e-08	-0.340807	0.137	0.223	0.00103738	Young_Phloem	Sevir.4G180900
Zm00001d039532.1	1.84524e-08	-0.241194	0.1	0.181	0.00104036	Young_Phloem	Sevir.5G130400
Sevir.5G124700.1	2.32783e-08	-0.29467	0.319	0.416	0.00131246	Young_Phloem	Sevir.5G124700
Sevir.7G194500	2.40942e-08	0.189965	0.14	0.083	0.00135845	Young_Phloem	Sevir.7G194500
Sevir.1G146200.1	2.45529e-08	-0.261357	0.074	0.145	0.00138432	Young_Phloem	Sevir.1G146200
Zm00001d010840.1	2.51953e-08	-0.26941	0.285	0.374	0.00142053	Young_Phloem	Sevir.7G277500
Sevir.6G106400.1	2.57837e-08	-0.263801	0.076	0.149	0.00145371	Young_Phloem	Sevir.6G106400
Sevir.9G241200	3.25394e-08	0.231858	0.358	0.278	0.0018346	Young_Phloem	Sevir.9G241200
Sevir.6G224100.1	3.41444e-08	-0.263464	0.275	0.373	0.00192509	Young_Phloem	Sevir.6G224100
Sevir.6G199100	3.49243e-08	0.176669	0.124	0.071	0.00196907	Young_Phloem	Sevir.6G199100
Sevir.5G260300.1	3.62904e-08	-0.182958	0.519	0.605	0.00204609	Young_Phloem	Sevir.5G260300
Sevir.4G198600	3.77377e-08	0.194521	0.542	0.465	0.00212769	Young_Phloem	Sevir.4G198600
Sevir.8G075900.1	3.86996e-08	-0.302773	0.088	0.162	0.00218192	Young_Phloem	Sevir.8G075900
Zm00001d050805.1	3.90056e-08	-0.27316	0.063	0.13	0.00219918	Young_Phloem	Sevir.1G200000
Sevir.8G203100	4.29089e-08	0.173257	0.105	0.058	0.00241925	Young_Phloem	Sevir.8G203100
Sevir.3G023400	4.56254e-08	-0.214252	0.311	0.412	0.00257241	Young_Phloem	Sevir.3G023400
Zm00001d020401.1	4.83846e-08	-0.313004	0.217	0.304	0.00272797	Young_Phloem	Sevir.2G207100
Zm00001d025590	5.03899e-08	-0.180148	0.133	0.22	0.00284103	Young_Phloem	Sevir.7G131600
Sevir.3G033700.1	5.54524e-08	-0.198501	0.717	0.771	0.00312646	Young_Phloem	Sevir.3G033700
Sevir.5G441400	5.91876e-08	-0.187459	0.12	0.204	0.00333706	Young_Phloem	Sevir.5G441400
Zm00001d015476	6.62198e-08	0.155637	0.119	0.067	0.00373354	Young_Phloem	Sevir.1G063700
Sevir.6G235100.1	7.30128e-08	-0.262982	0.312	0.403	0.00411654	Young_Phloem	Sevir.6G235100
Sevir.5G148700.1	9.5653e-08	-0.242194	0.094	0.165	0.00539301	Young_Phloem	Sevir.5G148700
Sevir.1G336500	1.0445e-07	0.1918	0.244	0.172	0.005889	Young_Phloem	Sevir.1G336500
Sevir.3G418200	1.16616e-07	0.181294	0.17	0.11	0.00657493	Young_Phloem	Sevir.3G418200
Zm00001d050864.1	1.17662e-07	-0.282247	0.382	0.481	0.00663392	Young_Phloem	Sevir.1G209300
Sevir.7G159600.1	1.18083e-07	-0.233181	0.124	0.203	0.00665765	Young_Phloem	Sevir.7G159600
Sevir.5G343800	1.2105e-07	0.190837	0.153	0.096	0.00682492	Young_Phloem	Sevir.5G343800
Sevir.9G351100.1	1.3009e-07	-0.233373	0.241	0.335	0.00733461	Young_Phloem	Sevir.9G351100
Zm00001d019670	1.32809e-07	0.151959	0.163	0.103	0.00748792	Young_Phloem	Sevir.2G150000
Sevir.1G004700.1	1.61244e-07	-0.225136	0.183	0.267	0.00909107	Young_Phloem	Sevir.1G004700
Sevir.2G419300.1	1.62669e-07	-0.345254	0.153	0.232	0.00917142	Young_Phloem	Sevir.2G419300
Zm00001d018399	1.66387e-07	0.179287	0.165	0.105	0.00938106	Young_Phloem	Sevir.1G360200
Sevir.9G540200.1	1.76751e-07	-0.23312	0.258	0.346	0.00996541	Young_Phloem	Sevir.9G540200
Sevir.5G425300	1.81214e-07	-0.109589	0.959	0.973	0.010217	Young_Phloem	Sevir.5G425300
Sevir.7G206100	1.94607e-07	-0.330389	0.347	0.438	0.0109721	Young_Phloem	Sevir.7G206100
Zm00001d002275.1	1.96034e-07	-0.195208	0.397	0.489	0.0110526	Young_Phloem	Sevir.7G252600
Zm00001d014989	2.11992e-07	-0.201407	0.058	0.12	0.0119523	Young_Phloem	Sevir.1G116000
Sevir.5G310800.1	2.20287e-07	-0.265102	0.24	0.329	0.01242	Young_Phloem	Sevir.5G310800
Zm00001d047761	2.20467e-07	0.194455	0.155	0.1	0.0124301	Young_Phloem	Sevir.9G449300
Zm00001d044555	2.20503e-07	0.158217	0.14	0.086	0.0124322	Young_Phloem	Sevir.5G192100
Sevir.9G533300	2.40493e-07	0.187592	0.271	0.199	0.0135593	Young_Phloem	Sevir.9G533300
Zm00001d042926	2.5811e-07	0.195803	0.258	0.186	0.0145525	Young_Phloem	Sevir.5G381000
Zm00001d003457.2	2.87939e-07	-0.218636	0.104	0.176	0.0162343	Young_Phloem	Sevir.7G129700
Zm00001d016364	3.09919e-07	0.168156	0.253	0.18	0.0174736	Young_Phloem	Sevir.1G034100
Sevir.4G121600.1	3.1559e-07	-0.266938	0.155	0.232	0.0177933	Young_Phloem	Sevir.4G121600
Sevir.4G181200.1	3.16553e-07	-0.321359	0.109	0.181	0.0178476	Young_Phloem	Sevir.4G181200
Sevir.7G160500.1	3.45969e-07	0.15037	0.133	0.081	0.0195061	Young_Phloem	Sevir.7G160500
Sevir.3G005800	3.48038e-07	0.13208	0.805	0.78	0.0196227	Young_Phloem	Sevir.3G005800
Zm00001d047618	4.12157e-07	-0.203498	0.534	0.606	0.0232378	Young_Phloem	Sevir.9G431200
Sevir.9G075800	4.30999e-07	-0.200156	0.232	0.32	0.0243002	Young_Phloem	Sevir.9G075800
Sevir.9G260500	4.34243e-07	0.203753	0.191	0.13	0.024483	Young_Phloem	Sevir.9G260500
Zm00001d038351.1	4.38359e-07	-0.145405	0.606	0.681	0.0247151	Young_Phloem	Sevir.3G226300
Sevir.1G001000.1	4.94762e-07	-0.188372	0.086	0.153	0.0278952	Young_Phloem	Sevir.1G001000
Sevir.8G037700.1	5.17492e-07	-0.238755	0.071	0.134	0.0291767	Young_Phloem	Sevir.8G037700
Sevir.7G189600.1	5.20276e-07	0.188785	0.246	0.178	0.0293337	Young_Phloem	Sevir.7G189600
Sevir.2G368400	5.53657e-07	0.159155	0.111	0.065	0.0312157	Young_Phloem	Sevir.2G368400
Sevir.9G447900	6.06025e-07	0.170829	0.557	0.491	0.0341683	Young_Phloem	Sevir.9G447900
Zm00001d032886	6.83292e-07	-0.228567	0.067	0.128	0.0385247	Young_Phloem	Sevir.9G242100
Sevir.7G270200	7.46809e-07	0.21536	0.282	0.212	0.0421059	Young_Phloem	Sevir.7G270200
Sevir.9G489700	7.86454e-07	-0.251537	0.165	0.241	0.0443411	Young_Phloem	Sevir.9G489700
Sevir.7G300400.1	8.61727e-07	-0.155322	0.696	0.737	0.0485851	Young_Phloem	Sevir.7G300400
Sevir.4G297400.1	8.91907e-07	-0.172578	0.082	0.146	0.0502866	Young_Phloem	Sevir.4G297400
Zm00001d035757.1	9.2147e-07	0.152643	0.107	0.063	0.0519534	Young_Phloem	Zm00001d035757.1
Zm00001d035775.1	9.54801e-07	-0.215774	0.075	0.135	0.0538326	Young_Phloem	Sevir.3G119200
Sevir.3G370100.1	9.68134e-07	-0.326475	0.113	0.18	0.0545843	Young_Phloem	Sevir.3G370100
Sevir.5G452000	1.01352e-06	-0.158634	0.061	0.12	0.0571431	Young_Phloem	Sevir.5G452000
Sevir.4G065800	1.21542e-06	0.243368	0.316	0.248	0.0685265	Young_Phloem	Sevir.4G065800
Sevir.4G025500	1.34622e-06	0.153659	0.126	0.079	0.0759015	Young_Phloem	Sevir.4G025500
Sevir.5G028500	1.4344e-06	-0.19309	0.05	0.105	0.0808732	Young_Phloem	Sevir.5G028500
Sevir.7G159300.1	1.44475e-06	-0.177443	0.141	0.217	0.0814564	Young_Phloem	Sevir.7G159300
Sevir.5G202100	1.49985e-06	0.183043	0.594	0.528	0.0845629	Young_Phloem	Sevir.5G202100
Zm00001d014611.1	1.56576e-06	-0.184612	0.099	0.164	0.0882789	Young_Phloem	Sevir.4G259300
Sevir.5G164300	1.6512e-06	-0.166827	0.14	0.214	0.0930965	Young_Phloem	Sevir.5G164300
Sevir.5G228700	1.66749e-06	-0.394817	0.206	0.285	0.0940148	Young_Phloem	Sevir.5G228700
Sevir.9G351800.1	1.67147e-06	-0.208856	0.17	0.247	0.0942392	Young_Phloem	Sevir.9G351800
Sevir.5G364100	1.74835e-06	0.199014	0.279	0.215	0.0985738	Young_Phloem	Sevir.5G364100
Zm00001d032823.1	1.84058e-06	-0.407267	0.291	0.365	0.103774	Young_Phloem	Sevir.9G235000
Zm00001d051392	1.87771e-06	-0.181239	0.182	0.258	0.105867	Young_Phloem	Sevir.1G268300
Zm00001d042179.1	1.91512e-06	-0.199384	0.208	0.288	0.107976	Young_Phloem	Sevir.5G451900
Sevir.8G115200	1.98459e-06	-0.242538	0.491	0.578	0.111893	Young_Phloem	Sevir.8G115200
Sevir.6G079000	2.26827e-06	-0.165797	0.188	0.272	0.127888	Young_Phloem	Sevir.6G079000
Zm00001d038310	2.42978e-06	0.139525	0.219	0.155	0.136994	Young_Phloem	Sevir.3G233000
Sevir.5G170800	2.61622e-06	-0.206324	0.303	0.386	0.147505	Young_Phloem	Sevir.5G170800
Sevir.2G136500.1	2.72325e-06	-0.178755	0.17	0.247	0.153539	Young_Phloem	Sevir.2G136500
Zm00001d024778.1	2.75469e-06	-0.41498	0.344	0.421	0.155312	Young_Phloem	Sevir.3G056200
Zm00001d029197	3.2472e-06	0.13844	0.161	0.107	0.18308	Young_Phloem	Sevir.9G404200
Zm00001d044812	3.30525e-06	0.177772	0.289	0.221	0.186353	Young_Phloem	Sevir.4G101000
Zm00001d043868.1	3.46172e-06	-0.206761	0.066	0.121	0.195175	Young_Phloem	Sevir.5G273500
Zm00001d046004.1	3.62611e-06	-0.176801	0.121	0.189	0.204444	Young_Phloem	Sevir.4G159600
Sevir.3G347400	3.70334e-06	0.148411	0.183	0.126	0.208798	Young_Phloem	Sevir.3G347400
Zm00001d049741	3.9083e-06	0.171393	0.171	0.117	0.220354	Young_Phloem	Sevir.6G216200
Sevir.1G306800	3.94404e-06	0.217647	0.232	0.172	0.222369	Young_Phloem	Sevir.1G306800
Sevir.5G069200	4.0385e-06	0.294074	0.267	0.21	0.227694	Young_Phloem	Sevir.5G069200
Zm00001d038023	4.8577e-06	-0.222066	0.094	0.154	0.273882	Young_Phloem	Sevir.3G289900
Zm00001d009566.1	5.01592e-06	-0.172068	0.634	0.693	0.282803	Young_Phloem	Sevir.3G149000
Sevir.7G057800	5.57822e-06	-0.202548	0.329	0.41	0.314506	Young_Phloem	Sevir.7G057800
Sevir.3G197600	5.89588e-06	0.155288	0.302	0.233	0.332415	Young_Phloem	Sevir.3G197600
Zm00001d017095.1	5.90741e-06	-0.187635	0.091	0.15	0.333066	Young_Phloem	Sevir.1G222200
Zm00001d014883.1	6.06398e-06	0.154091	0.379	0.306	0.341894	Young_Phloem	Sevir.4G301400
Zm00001d029747.1	6.1468e-06	0.182035	0.502	0.439	0.346563	Young_Phloem	Sevir.9G346700
Zm00001d027874	6.4305e-06	0.14565	0.154	0.103	0.362558	Young_Phloem	Sevir.9G525800
Zm00001d027925.1	6.50723e-06	-0.208908	0.244	0.322	0.366884	Young_Phloem	Sevir.9G521100
Sevir.7G259000.1	6.64918e-06	-0.161954	0.055	0.107	0.374887	Young_Phloem	Sevir.7G259000
Sevir.7G254200	6.68651e-06	0.1356	0.245	0.18	0.376992	Young_Phloem	Sevir.7G254200
Sevir.2G183300	7.05344e-06	-0.15703	0.095	0.156	0.39768	Young_Phloem	Sevir.2G183300
Zm00001d042096.1	7.39336e-06	-0.155264	0.448	0.526	0.416845	Young_Phloem	Sevir.5G459400
Sevir.9G095600	8.22128e-06	-0.152276	0.664	0.715	0.463524	Young_Phloem	Sevir.9G095600
Sevir.9G063500	9.19591e-06	0.157799	0.146	0.098	0.518475	Young_Phloem	Sevir.9G063500
Sevir.3G220200	9.30423e-06	-0.165537	0.823	0.859	0.524582	Young_Phloem	Sevir.3G220200
Sevir.6G068100.1	9.31752e-06	0.101923	0.128	0.082	0.525331	Young_Phloem	Sevir.6G068100
Zm00001d021850	9.59178e-06	0.160443	0.231	0.167	0.540794	Young_Phloem	Sevir.2G370600
Sevir.4G289100	1.01474e-05	0.179298	0.174	0.122	0.572119	Young_Phloem	Sevir.4G289100
Zm00001d003457.1.1	1.1054e-05	-0.146715	0.054	0.103	0.623235	Young_Phloem	Zm00001d003457.1
Zm00001d042936.1	1.18115e-05	-0.168605	0.58	0.633	0.665943	Young_Phloem	Sevir.5G379700
Zm00001d038487	1.18227e-05	0.156943	0.173	0.121	0.666575	Young_Phloem	Sevir.3G208000
Sevir.7G159800	1.264e-05	-0.125546	0.079	0.135	0.712658	Young_Phloem	Sevir.7G159800
Sevir.7G239000.1	1.34587e-05	-0.14804	0.125	0.19	0.758813	Young_Phloem	Sevir.7G239000
Sevir.7G269700	1.35649e-05	0.210924	0.275	0.216	0.7648	Young_Phloem	Sevir.7G269700
Sevir.2G286400.1	1.37108e-05	-0.143334	0.138	0.206	0.773031	Young_Phloem	Sevir.2G286400
Sevir.9G494500.1	1.43043e-05	-0.194047	0.182	0.251	0.80649	Young_Phloem	Sevir.9G494500
Sevir.8G109600	1.44065e-05	-0.15651	0.373	0.45	0.812255	Young_Phloem	Sevir.8G109600
Sevir.3G304700.1	1.47467e-05	-0.208042	0.082	0.135	0.831433	Young_Phloem	Sevir.3G304700
Zm00001d011434.1	1.48147e-05	-0.210742	0.17	0.242	0.835269	Young_Phloem	Sevir.5G244400
Sevir.1G246800	1.53316e-05	-0.278825	0.236	0.304	0.864408	Young_Phloem	Sevir.1G246800
Sevir.2G260900.1	1.62197e-05	-0.157328	0.107	0.167	0.914485	Young_Phloem	Sevir.2G260900
Sevir.1G334800	1.74679e-05	0.124866	0.136	0.09	0.984858	Young_Phloem	Sevir.1G334800
Zm00001d030868	1.81211e-05	-0.134538	0.061	0.111	1	Young_Phloem	Sevir.3G386600
Sevir.7G131200	1.84096e-05	0.143313	0.178	0.125	1	Young_Phloem	Sevir.7G131200
Sevir.8G179000.1	1.85511e-05	-0.173234	0.356	0.434	1	Young_Phloem	Sevir.8G179000
Sevir.1G218000	1.90582e-05	0.135708	0.126	0.083	1	Young_Phloem	Sevir.1G218000
Zm00001d041430	1.98923e-05	-0.180968	0.244	0.318	1	Young_Phloem	Sevir.3G397500
Zm00001d026415	2.01464e-05	0.150391	0.167	0.116	1	Young_Phloem	Sevir.7G269100
Zm00001d052170	2.06005e-05	-0.147027	0.09	0.146	1	Young_Phloem	Sevir.1G336900
Zm00001d046893	2.23326e-05	-0.13757	0.117	0.18	1	Young_Phloem	Sevir.4G158100
Sevir.7G004900.1	2.23449e-05	-0.250477	0.203	0.269	1	Young_Phloem	Sevir.7G004900
Zm00001d036360	2.23465e-05	-0.156814	0.075	0.127	1	Young_Phloem	Sevir.4G298800
Sevir.3G238300.1	2.28114e-05	0.12	0.124	0.08	1	Young_Phloem	Sevir.3G238300
Sevir.9G447300	2.32325e-05	0.113107	0.107	0.067	1	Young_Phloem	Sevir.9G447300
Sevir.2G384900	2.34923e-05	0.14987	0.105	0.066	1	Young_Phloem	Sevir.2G384900
Zm00001d052903	2.42452e-05	0.155352	0.296	0.234	1	Young_Phloem	Sevir.6G215300
Sevir.1G191100	2.48208e-05	0.122343	0.117	0.076	1	Young_Phloem	Sevir.1G191100
Zm00001d032950	2.51313e-05	-0.125579	0.577	0.644	1	Young_Phloem	Sevir.9G266500
Sevir.2G073300	2.53502e-05	0.166913	0.225	0.17	1	Young_Phloem	Sevir.2G073300
Zm00001d017119	2.83733e-05	-0.173948	0.132	0.193	1	Young_Phloem	Sevir.1G225300
Zm00001d028613	2.87024e-05	0.107082	0.104	0.065	1	Young_Phloem	Sevir.9G456800
Zm00001d018969	2.92921e-05	-0.13829	0.522	0.583	1	Young_Phloem	Sevir.2G060700
Sevir.4G103100	2.96141e-05	-0.142182	0.099	0.156	1	Young_Phloem	Sevir.4G103100
Zm00001d018799	2.96319e-05	-0.147504	0.057	0.104	1	Young_Phloem	Sevir.2G037000
Sevir.8G230100.1	3.05069e-05	-0.337008	0.323	0.388	1	Young_Phloem	Sevir.8G230100
Zm00001d005391.1	3.07275e-05	-0.14803	0.188	0.26	1	Young_Phloem	Sevir.2G134100
Zm00001d018452.1	3.20616e-05	0.117907	0.145	0.098	1	Young_Phloem	Zm00001d018452.1
Sevir.3G191000.1	3.36911e-05	-0.180903	0.183	0.247	1	Young_Phloem	Sevir.3G191000
Zm00001d002121	3.4314e-05	-0.103023	0.08	0.135	1	Young_Phloem	Sevir.7G270100
Zm00001d015468.1	3.50922e-05	-0.13667	0.083	0.136	1	Young_Phloem	Sevir.1G064400
Zm00001d025984.1	3.81338e-05	-0.190848	0.2	0.269	1	Young_Phloem	Sevir.7G196400
Sevir.7G236500	3.88001e-05	0.168608	0.123	0.083	1	Young_Phloem	Sevir.7G236500
Sevir.5G272300	4.24496e-05	0.134961	0.158	0.111	1	Young_Phloem	Sevir.5G272300
Sevir.8G221600	4.27494e-05	-0.131456	0.126	0.191	1	Young_Phloem	Sevir.8G221600
Sevir.6G223800	4.36959e-05	-0.289104	0.19	0.254	1	Young_Phloem	Sevir.6G223800
Zm00001d047110.1	4.56262e-05	-0.160171	0.066	0.113	1	Young_Phloem	Sevir.9G334800
Zm00001d043601	4.8602e-05	0.229741	0.314	0.259	1	Young_Phloem	Sevir.5G304400
Zm00001d033805.1	5.33741e-05	-0.155443	0.277	0.351	1	Young_Phloem	Sevir.9G111900
Sevir.2G379800	5.52094e-05	-0.139766	0.107	0.165	1	Young_Phloem	Sevir.2G379800
Zm00001d038718.1	5.58938e-05	-0.119268	0.179	0.25	1	Young_Phloem	Sevir.3G181600
Sevir.7G305900.1	5.6432e-05	0.10156	0.802	0.766	1	Young_Phloem	Sevir.7G305900
Sevir.5G277500	5.64651e-05	-0.130509	0.063	0.11	1	Young_Phloem	Sevir.5G277500
Zm00001d021739	5.71561e-05	0.132403	0.129	0.087	1	Young_Phloem	Sevir.2G359500
Sevir.9G350900	6.06935e-05	-0.167523	0.282	0.354	1	Young_Phloem	Sevir.9G350900
Sevir.1G280100	6.12358e-05	0.118906	0.113	0.074	1	Young_Phloem	Sevir.1G280100
Zm00001d019089.1	6.48887e-05	-0.149278	0.099	0.152	1	Young_Phloem	Sevir.2G073800
Sevir.3G145700	6.7058e-05	0.123514	0.481	0.416	1	Young_Phloem	Sevir.3G145700
Sevir.8G014900	6.75063e-05	0.161559	0.252	0.195	1	Young_Phloem	Sevir.8G014900
Sevir.7G165800	6.82888e-05	0.108654	0.101	0.065	1	Young_Phloem	Sevir.7G165800
Zm00001d016034.1	7.14465e-05	-0.600104	0.14	0.191	1	Young_Phloem	Sevir.1G008300
Zm00001d045218.1	7.31907e-05	-0.150552	0.116	0.172	1	Young_Phloem	Sevir.4G060100
Sevir.3G186400	7.32457e-05	0.110771	0.733	0.688	1	Young_Phloem	Sevir.3G186400
Sevir.7G260100.1	7.72042e-05	-0.370883	0.237	0.292	1	Young_Phloem	Sevir.7G260100
Sevir.2G336500	7.79282e-05	-0.120484	0.274	0.354	1	Young_Phloem	Sevir.2G336500
Zm00001d033983	8.19436e-05	-0.136188	0.294	0.364	1	Young_Phloem	Sevir.9G094900
Zm00001d043655	8.32049e-05	0.149196	0.141	0.099	1	Young_Phloem	Sevir.5G298700
Sevir.2G084400	8.33661e-05	0.156213	0.506	0.448	1	Young_Phloem	Sevir.2G084400
Sevir.9G369200	8.74167e-05	-0.146089	0.07	0.116	1	Young_Phloem	Sevir.9G369200
Sevir.9G270300	8.84341e-05	-0.169837	0.221	0.285	1	Young_Phloem	Sevir.9G270300
[truncated: 14,414 more rows]
