# Supplementary material for: Gene duplication and cellular divergence in crops
Source: Research Square preprint supplement (doi:10.21203/rs.3.rs-1739501/v1), 2022-06-17
Supplement: Supplementary file 4 [file 5624b9c73f2a4b1c7fa8022d.xlsx]

## Sheet: Analysis Dom vs Sub Root
Triplet Number	Sorghum	S Ka/Ks	M1	M1 Ka/Ks	M2	M2 Ka/Ks	annot	M1 dom	M2 dom	Co-expression	Sorghum not expressed	Final Score normalized	Neo ?		Behavior	# genes	% total gene	#Neo	% of neo per behavior	Dominant homeolog is neofunctionalized	The weaker duplicate is neofunctionalized	When M1 or M2 expressed in the same number of cell type but one is neofunctionilzed	M1 and M2 neofunctionilzed together	Total
1	SORBI-3006G274700	0.172749	Zm00001d001766	#N/A	Zm00001d026665	0.146205		2	0	14	0	-0.125	Not_Neo		Subfunctionilazed	935	0.185075	312	0.33369	0.45	0.112179	0.0416667	0.397436	1.00128											Zm00001d002449				-0.25	Not_Neo	Zm00001d002241	#N/A		Not_Neo	460		Dom	400	22
2	SORBI-3006G274300	0.0588148	Zm00001d001772	#N/A	Zm00001d026662	#N/A		0	16	0	8	-1	Not_Neo		Dominant	3514	0.695566	645	0.183552	0.79	0.0155039	0	0.196899	1.0024											Zm00001d002530				0	Not_Neo	Zm00001d002243	#N/A		M1	54		Sub	86
3	SORBI-3006G273800	0.122089	Zm00001d001774	#N/A	Zm00001d026657	#N/A		6	2	8	7	0.125	Not_Neo		Coexpressed	555	0.109857	81	0.145946	0	0	0.530864	0.469136	1											Zm00001d002654				-0.9375	Not_Neo	Zm00001d002244	#N/A		M2	30		co	78
4	SORBI-3006G273200	0.366017	Zm00001d001780	0.29886	Zm00001d026653	#N/A	Malectin-like domain	8	0	8	0	-0.5	Not_Neo																							Zm00001d002751				-1	Not_Neo	Zm00001d002530	#N/A		M1_M2	22			564
5	SORBI-3006G273000	0.16714	Zm00001d001784	0.100144	Zm00001d026652	0.202324		0	3	6	16	-0.333333	M1_M2																							Zm00001d002756				-0.75	Not_Neo	Zm00001d002625	Zm00001d026079			22
6	SORBI-3006G272200	0.0479825	Zm00001d001787	9.85756e-05	Zm00001d026647	#N/A		0	0	16	0	0	Not_Neo																							Zm00001d002757				0	Not_Neo	Zm00001d002639	#N/A			44
7	SORBI-3006G271800	0.211227	Zm00001d001788	0.606324	Zm00001d026645	0.657798		14	0	2	0	-0.875	Not_Neo																							Zm00001d002823				-0.5	Not_Neo	Zm00001d002650	#N/A
8	SORBI-3006G271200	0.294555	Zm00001d001790	0.156159	Zm00001d026641	0.321207		0	1	15	0	-0.0625	Not_Neo																							Zm00001d002827				-1	Not_Neo	Zm00001d002654	#N/A
9	SORBI-3006G271000	#N/A	Zm00001d001797	#N/A	Zm00001d026640	#N/A	Cyclophilin type peptidyl-prolyl cis-trans isomerase/CLD	16	0	0	0	-1	Not_Neo		Number of neofunctionalized genes expression per cell type and per subgenome																					Zm00001d002828				-1	M1	Zm00001d002673	#N/A
10	SORBI-3006G270900	0.194308	Zm00001d001798	0.161797	Zm00001d026639	0.106276		0	7	9	0	-0.4375	Not_Neo			Columella	Cortex_1	Endodermis	Cortex_3	Cortex_4	Trichoblast	Epidermis_2	Epidermis_3	G2_M	Young_Stele_1	Young_Stele_2	Stele	Pericycle	Xylem	Young Phloem	Phloem					Zm00001d002829				-0.5	Not_Neo	Zm00001d002757	#N/A
11	SORBI-3006G270500	#N/A	Zm00001d001800	#N/A	Zm00001d026636	#N/A		16	0	0	0	-1	Not_Neo		M1 Neo	256	215	181	204	201	207	222	261	269	201	218	217	203	201	216	225					Zm00001d002830				-0.833333	M2	Zm00001d002797	#N/A
12	SORBI-3006G269700	0.407435	Zm00001d001811	0.387616	Zm00001d026634	0.259422		2	1	13	0	0.015625	Not_Neo		M2 Neo	192	173	153	159	190	144	186	240	205	142	196	219	158	155	170	186					Zm00001d002982				-0.875	Not_Neo	Zm00001d002797	#N/A
13	SORBI-3006G268900	0.110499	Zm00001d001814	0.190588	Zm00001d026630	0.132736		0	0	16	0	0	Not_Neo																							Zm00001d003007				-0.0625	Not_Neo	Zm00001d002827	#N/A
14	SORBI-3006G268300	0.120857	Zm00001d001819	1.06086	Zm00001d026629	0.234802		0	11	5	2	-0.6875	Not_Neo																							Zm00001d003103				-0.9375	Not_Neo	Zm00001d002830	#N/A
15	SORBI-3006G267900	0.183175	Zm00001d001824	#N/A	Zm00001d026628	#N/A		16	0	0	4	-1	Not_Neo																							Zm00001d003106				-1	Not_Neo	Zm00001d002969	#N/A
16	SORBI-3006G267800	0.150157	Zm00001d001825	#N/A	Zm00001d026627	#N/A		7	0	9	0	-0.4375	Not_Neo																							Zm00001d003147				-0.3125	Not_Neo	Zm00001d003103	#N/A
17	SORBI-3006G267700	0.0926209	Zm00001d001826	0.072713	Zm00001d026625	0.206979		4	0	8	15	-0.333333	M1_M2																							Zm00001d003179				-0.5625	Not_Neo	Zm00001d003106	#N/A
18	SORBI-3006G267500	0.215415	Zm00001d001828	0.327261	Zm00001d026621	0.293004		1	0	15	0	-0.0625	Not_Neo																							Zm00001d003220				-0.5	Not_Neo	Zm00001d003124	#N/A
19	SORBI-3006G267400	994.275	Zm00001d001829	0.140306	Zm00001d026620	0.235533	Insertion domain in 60S ribosomal protein L10P	2	1	2	16	0.16	M1																							Zm00001d003222				-1	Not_Neo	Zm00001d003147	#N/A
20	SORBI-3006G267200	0.000102417	Zm00001d001831	0.0410754	Zm00001d026619	0.0149849		1	0	15	0	-0.0625	Not_Neo																							Zm00001d003223				-0.9375	Not_Neo	Zm00001d003179	#N/A
21	SORBI-3006G266300	0.235282	Zm00001d001839	0.219776	Zm00001d026611	0.197475		0	11	5	0	-0.6875	Not_Neo																							Zm00001d003224				-1	Not_Neo	Zm00001d003220	#N/A
22	SORBI-3006G266100	#N/A	Zm00001d001841	#N/A	Zm00001d026609	#N/A		0	2	14	0	-0.125	Not_Neo																							Zm00001d003226				-0.25	Not_Neo	Zm00001d003222	#N/A
23	SORBI-3006G265900	0.412256	Zm00001d001843	0.700808	Zm00001d026608	0.14193		1	0	15	0	-0.0625	Not_Neo																							Zm00001d003227				-1	Not_Neo	Zm00001d003245	#N/A
24	SORBI-3006G265600	0.0531507	Zm00001d001846	0.0926866	Zm00001d026607	0.0557122		0	0	16	0	0	Not_Neo																							Zm00001d003234				-0.5	Not_Neo	Zm00001d003248	#N/A
25	SORBI-3006G264900	#N/A	Zm00001d001850	#N/A	Zm00001d026603	#N/A		1	7	4	16	0.0277778	M2																							Zm00001d003237				-0.833333	M1	Zm00001d003363	#N/A
26	SORBI-3006G264500	3.26087	Zm00001d001855	0.115382	Zm00001d026600	0.16264		0	10	6	0	-0.625	Not_Neo																							Zm00001d003242				-0.6875	Not_Neo	Zm00001d003401	#N/A
27	SORBI-3006G264201	#N/A	Zm00001d001857	#N/A	Zm00001d026599	#N/A		15	0	0	11	-1	M1																							Zm00001d003245				0.015625	Not_Neo	Zm00001d003598	#N/A
28	SORBI-3006G263600	0.177529	Zm00001d001862	0.314435	Zm00001d026597	0.293157		15	0	0	1	-1	M1																							Zm00001d003246				0.0236686	M1	Zm00001d003598	#N/A
29	SORBI-3006G263300	943.8	Zm00001d001865	0.0501307	Zm00001d026594	0.0565318		6	0	10	0	-0.375	Not_Neo																							Zm00001d003247				-0.1875	Not_Neo	Zm00001d003611	Zm00001d025461
30	SORBI-3006G263200	0.271531	Zm00001d001866	0.216398	Zm00001d026593	0.487891		4	0	12	0	-0.25	Not_Neo																							Zm00001d003248				-0.3125	Not_Neo	Zm00001d003850	#N/A
31	SORBI-3006G262100	0.0918847	Zm00001d001879	0.153146	Zm00001d026590	0.351286		16	0	0	0	-1	Not_Neo																							Zm00001d003363				-0.727273	M1	Zm00001d003852	#N/A
32	SORBI-3006G261900	#N/A	Zm00001d001880	#N/A	Zm00001d026588	#N/A	Protein tyrosine kinase	4	0	12	0	-0.25	Not_Neo																							Zm00001d003400				-0.666667	M1	Zm00001d003852	#N/A
33	SORBI-3006G262300	#N/A	Zm00001d001880	#N/A	Zm00001d026589	#N/A	Protein tyrosine kinase	16	0	0	0	-1	Not_Neo																							Zm00001d003401				-0.8125	Not_Neo	Zm00001d003852	#N/A
34	SORBI-3006G261500	0.0461686	Zm00001d001883	0.103318	Zm00001d026586	0.106794		4	2	10	1	0.09375	Not_Neo																							Zm00001d003403				-1	M1	Zm00001d003877	#N/A
35	SORBI-3006G261600	0.0341558	Zm00001d001883	0.103318	Zm00001d026586	0.106794		4	2	10	0	0.09375	Not_Neo																							Zm00001d003534				-0.0666667	M2	Zm00001d004007	#N/A
36	SORBI-3006G261400	#N/A	Zm00001d001884	#N/A	Zm00001d026585	#N/A		0	0	16	0	0	Not_Neo																							Zm00001d003598				0.21875	Not_Neo	Zm00001d004022	#N/A
37	SORBI-3006G261100	0.1331	Zm00001d001895	0.346947	Zm00001d026582	0.495379		1	0	15	0	-0.0625	Not_Neo																							Zm00001d003600				0	Not_Neo	Zm00001d004023	Zm00001d025178
38	SORBI-3006G260400	#N/A	Zm00001d001899	#N/A	Zm00001d026578	#N/A		0	16	0	0	-1	Not_Neo																							Zm00001d003601				-0.625	Not_Neo	Zm00001d004036	Zm00001d025182
39	SORBI-3006G260300	0.130219	Zm00001d001900	0.136669	Zm00001d026577	0.0507028	Cyclin M transmembrane N-terminal domain	0	16	0	0	-1	Not_Neo																							Zm00001d003607				-0.0625	Not_Neo	Zm00001d014358	#N/A
40	SORBI-3006G260700	0.0915803	Zm00001d001900	0.136669	Zm00001d026577	0.0507028	Cyclin M transmembrane N-terminal domain	0	0	0	16	NA	M2																							Zm00001d003611				-0.9375	Not_Neo	Zm00001d014360	#N/A
41	SORBI-3006G259900	0.383159	Zm00001d001901	0.417555	Zm00001d026575	0.117925		13	0	3	0	-0.8125	Not_Neo																							Zm00001d003850				-1	Not_Neo	Zm00001d014513	#N/A
42	SORBI-3006G259000	#N/A	Zm00001d001907	#N/A	Zm00001d026563	#N/A		0	0	16	0	0	Not_Neo																							Zm00001d003852				-0.875	Not_Neo	Zm00001d014550	#N/A
43	SORBI-3006G258900	0.728663	Zm00001d001908	0.732711	Zm00001d026562	0.529873		9	0	7	12	-0.5625	Not_Neo																							Zm00001d004006				-0.8	M1	Zm00001d014584	#N/A
44	SORBI-3006G258600	0.468929	Zm00001d001910	0.728254	Zm00001d026560	0.438356	Protein tyrosine kinase	8	3	5	12	0.296875	Not_Neo																							Zm00001d004007				0.015625	Not_Neo	Zm00001d014587	#N/A
45	SORBI-3006G257700	0.19148	Zm00001d001915	0.176459	Zm00001d026554	0.0740069		0	16	0	1	-1	Not_Neo																							Zm00001d004009				-0.625	Not_Neo	Zm00001d014597	#N/A
46	SORBI-3006G257200	0.0508451	Zm00001d001928	0.215525	Zm00001d026548	0.090836		0	6	10	0	-0.375	Not_Neo																							Zm00001d004010				-0.3125	Not_Neo	Zm00001d014775	#N/A
47	SORBI-3006G257001	#N/A	Zm00001d001929	#N/A	Zm00001d026547	#N/A		0	0	16	0	0	Not_Neo																							Zm00001d014542				-1	Not_Neo	Zm00001d014814	#N/A
48	SORBI-3006G256600	0.312092	Zm00001d001932	0.141409	Zm00001d026543	0.228718		0	12	4	0	-0.75	Not_Neo																							Zm00001d014550				-0.0625	Not_Neo	Zm00001d014943	#N/A
49	SORBI-3006G256200	0.311867	Zm00001d001936	0.22089	Zm00001d026542	0.209444		1	9	6	9	0.015625	Not_Neo																							Zm00001d014568				-0.0625	Not_Neo	Zm00001d014943	#N/A
50	SORBI-3006G256100	0.24106	Zm00001d001937	0.203249	Zm00001d026541	0.643743		13	0	3	0	-0.8125	Not_Neo																							Zm00001d014569				-1	Not_Neo	Zm00001d014947	#N/A
51	SORBI-3006G255300	0.253186	Zm00001d001945	0.179483	Zm00001d026540	0.189436	Hsp20/alpha crystallin family	9	3	2	15	0.428571	Not_Neo																							Zm00001d014571				-0.923077	M2	Zm00001d014949	#N/A
52	SORBI-3006G254600	0.17132	Zm00001d001952	0.490424	Zm00001d026536	0.447972		11	0	5	0	-0.6875	Not_Neo																							Zm00001d014575				0	M1	Zm00001d014950	#N/A
53	SORBI-3006G254500	0.45261	Zm00001d001953	0.344903	Zm00001d026535	0.593842		0	16	0	0	-1	Not_Neo																							Zm00001d014583				-1	M1	Zm00001d014976	#N/A
54	SORBI-3006G254100	0.274311	Zm00001d001959	0.192476	Zm00001d026531	0.266041		15	0	1	0	-0.9375	Not_Neo																							Zm00001d014584				-1	M1	Zm00001d014976	#N/A
55	SORBI-3006G252600	0.14587	Zm00001d001963	0.163778	Zm00001d026530	0.00570255	Pollen proteins Ole e I like	10	2	1	11	0.284024	Not_Neo																							Zm00001d014585				-1	M1	Zm00001d014976	#N/A
56	SORBI-3006G253300	0.400337	Zm00001d001963	0.163778	Zm00001d026530	0.00570255	Pollen proteins Ole e I like	6	2	1	16	0.395062	M1																							Zm00001d014587				-0.9375	Not_Neo	Zm00001d015006	#N/A
57	SORBI-3006G253700	0.429098	Zm00001d001963	0.163778	Zm00001d026530	0.00570255	Pollen proteins Ole e I like	0	0	1	16	0	M1_M2																							Zm00001d014595				-0.6875	Not_Neo	Zm00001d015103	#N/A
58	SORBI-3006G252466	0.0285587	Zm00001d001964	0.116964	Zm00001d026530	0.00570255	Pollen proteins Ole e I like	14	0	1	0	-0.933333	Not_Neo																							Zm00001d014596				-0.875	Not_Neo	Zm00001d015125	#N/A
59	SORBI-3006G252200	9.05852e-05	Zm00001d001966	9.9458e-05	Zm00001d026517	0.0276634		0	0	16	0	0	Not_Neo																							Zm00001d014597				-1	Not_Neo	Zm00001d015248	#N/A
60	SORBI-3006G252100	0.387105	Zm00001d001967	0.102147	Zm00001d026516	0.148409		16	0	0	0	-1	Not_Neo																							Zm00001d014598				-0.5	Not_Neo	Zm00001d015383	#N/A
61	SORBI-3006G251800	0.000105278	Zm00001d001970	0.706457	Zm00001d026515	0.310673	Putative AtpZ or ATP-synthase-associated	0	9	7	0	-0.5625	Not_Neo																							Zm00001d014613				-0.25	Not_Neo	Zm00001d015410	#N/A
62	SORBI-3006G251500	0.265426	Zm00001d001974	0.33065	Zm00001d026514	0.234026		0	11	5	0	-0.6875	Not_Neo																							Zm00001d014617				-1	Not_Neo	Zm00001d015426	#N/A
63	SORBI-3006G251000	0.148026	Zm00001d001978	0.111016	Zm00001d026511	0.233565		0	1	15	0	-0.0625	Not_Neo																							Zm00001d014625				0.015625	Not_Neo	Zm00001d015433	#N/A
64	SORBI-3006G250500	0.609972	Zm00001d001982	0.128706	Zm00001d026510	0.409408		3	2	8	2	0.118343	Not_Neo																							Zm00001d014626				-0.1875	Not_Neo	Zm00001d015435	#N/A
65	SORBI-3006G249300	0.28335	Zm00001d001989	0.544055	Zm00001d026500	0.319506	Pollen proteins Ole e I like	3	4	2	13	0.54321	M2																							Zm00001d014813				0	Not_Neo	Zm00001d015568	#N/A
66	SORBI-3006G248900	0.353833	Zm00001d001994	0.230024	Zm00001d026495	0.279271		0	11	5	0	-0.6875	Not_Neo																							Zm00001d014814				-1	M1	Zm00001d015569	#N/A
67	SORBI-3006G247100	0.0566843	Zm00001d002006	0.0280924	Zm00001d026490	0.014202	Transmembrane amino acid transporter protein	5	0	11	0	-0.3125	Not_Neo																							Zm00001d014816				-0.8125	Not_Neo	Zm00001d015581	#N/A
68	SORBI-3006G246900	0.602407	Zm00001d002012	0.719522	Zm00001d026487	0.548168		0	8	8	0	-0.5	Not_Neo																							Zm00001d014817				-1	Not_Neo	Zm00001d015613	#N/A
69	SORBI-3006G246300	0.100145	Zm00001d002019	0.105593	Zm00001d026489	0.14455		2	0	9	16	-0.181818	M1_M2																							Zm00001d014943				-1	M2	Zm00001d015623	#N/A
70	SORBI-3006G246200	0.208566	Zm00001d002020	0.0652546	Zm00001d026489	0.14455	FHA domain	7	0	5	14	-0.583333	M1_M2																							Zm00001d014944				0.302222	Not_Neo	Zm00001d015628	#N/A
71	SORBI-3006G245100	0.178994	Zm00001d002022	0.148728	Zm00001d026479	0.174771		7	0	7	12	-0.5	M1																							Zm00001d014945				0	Not_Neo	Zm00001d015635	#N/A
72	SORBI-3006G245400	0.159315	Zm00001d002024	0.112909	Zm00001d026483	0.183835		0	0	16	0	0	Not_Neo																							Zm00001d014946				0	Not_Neo	Zm00001d015635	#N/A
73	SORBI-3006G244900	0.21176	Zm00001d002028	0.378592	Zm00001d026478	0.651323		16	0	0	0	-1	Not_Neo																							Zm00001d014947				-0.9375	Not_Neo	Zm00001d015639	#N/A
74	SORBI-3006G244800	0.355369	Zm00001d002029	0.570936	Zm00001d026477	0.61135		0	16	0	0	-1	Not_Neo																							Zm00001d014948				-0.9375	Not_Neo	Zm00001d015767	#N/A
75	SORBI-3006G244700	#N/A	Zm00001d002034	#N/A	Zm00001d026476	#N/A		10	0	6	0	-0.625	Not_Neo																							Zm00001d014949				-0.1875	Not_Neo	Zm00001d015778	#N/A
76	SORBI-3006G243400	0.175898	Zm00001d002051	0.124081	Zm00001d026472	0.210087		16	0	0	0	-1	Not_Neo																							Zm00001d014950				-0.625	Not_Neo	Zm00001d015780	#N/A
77	SORBI-3006G242500	#N/A	Zm00001d002056	#N/A	Zm00001d026469	#N/A		1	4	11	3	0.015625	Not_Neo																							Zm00001d014951				-0.1875	Not_Neo	Zm00001d015785	#N/A
78	SORBI-3006G242200	0.221148	Zm00001d002063	0.0958616	Zm00001d026471	0.139371		0	0	3	16	0	M1																							Zm00001d014972				-0.8125	Not_Neo	Zm00001d015788	#N/A
79	SORBI-3006G242900	0.118177	Zm00001d002063	0.0958616	Zm00001d026471	0.139371		12	0	3	5	-0.8	M1																							Zm00001d014976				0.16	M1	Zm00001d015798	#N/A
80	SORBI-3006G242100	0.0663015	Zm00001d002064	0.0848346	Zm00001d026460	#N/A	Pollen proteins Ole e I like	4	0	12	0	-0.25	Not_Neo																							Zm00001d014977				-0.8	M2	Zm00001d015825	#N/A
81	SORBI-3006G242000	0.116527	Zm00001d002065	0.10311	Zm00001d026458	0.169564		0	1	15	0	-0.0625	Not_Neo																							Zm00001d014983				-0.1875	Not_Neo	Zm00001d015837	#N/A
82	SORBI-3006G241600	0.0915225	Zm00001d002069	0.492149	Zm00001d026457	0.240377		10	0	6	0	-0.625	Not_Neo																							Zm00001d014984				-0.5625	Not_Neo	Zm00001d015839	#N/A
83	SORBI-3006G241350	0.085759	Zm00001d002071	0.47838	Zm00001d026457	0.240377		8	0	4	13	-0.666667	M1																							Zm00001d014986				-0.0625	Not_Neo	Zm00001d015842	#N/A
84	SORBI-3006G241400	0.0352817	Zm00001d002071	0.47838	Zm00001d026457	0.240377		4	0	4	15	-0.5	M1																							Zm00001d015004				0	M1_M2	Zm00001d016136	#N/A
85	SORBI-3006G240700	0.245017	Zm00001d002075	0.166381	Zm00001d026448	0.237816		16	0	0	0	-1	Not_Neo																							Zm00001d015006				0.015625	Not_Neo	Zm00001d016604	#N/A
86	SORBI-3006G240500	0.071867	Zm00001d002079	0.733033	Zm00001d026447	0.447232		1	6	9	0	0.015625	Not_Neo																							Zm00001d015100				-1	Not_Neo	Zm00001d016850	#N/A
87	SORBI-3006G240400	0.375186	Zm00001d002080	0.290806	Zm00001d026445	0.25413		11	1	4	0	0.015625	Not_Neo																							Zm00001d015101				-0.3125	Not_Neo	Zm00001d017176	#N/A
88	SORBI-3006G240200	0.298292	Zm00001d002083	0.341607	Zm00001d026444	0.349919		8	0	0	16	-1	M1																							Zm00001d015101				0	Not_Neo	Zm00001d017177	#N/A
89	SORBI-3006G239300	0.0898399	Zm00001d002087	0.741565	Zm00001d026442	0.11749		15	0	1	1	-0.9375	Not_Neo																							Zm00001d015102				-1	Not_Neo	Zm00001d017330	#N/A
90	SORBI-3006G239100	0.123889	Zm00001d002088	0.419152	Zm00001d026440	0.253562	Thaumatin family	6	2	3	15	0.264463	M2																							Zm00001d015103				-0.8	M1_M2	Zm00001d017486	#N/A
91	SORBI-3006G239000	0.175653	Zm00001d002089	0.317127	Zm00001d026439	0.308219		0	15	1	1	-0.9375	Not_Neo																							Zm00001d015114				-0.3125	Not_Neo	Zm00001d017491	#N/A
92	SORBI-3006G236900	0.0751409	Zm00001d002100	0.206795	Zm00001d026431	0.0824348	1,3-beta-glucan synthase component	0	4	0	16	-1	M2																							Zm00001d015115				-0.75	M1_M2	Zm00001d017516	#N/A
93	SORBI-3006G237300	0.0955385	Zm00001d002100	0.206795	Zm00001d026431	0.0824348	1,3-beta-glucan synthase component	0	15	0	7	-1	M2																							Zm00001d015245				-1	Not_Neo	Zm00001d017755	Zm00001d051553
94	SORBI-3006G237000	0.0823842	Zm00001d002103	0.277115	Zm00001d026429	0.493782		0	8	8	0	-0.5	Not_Neo																							Zm00001d015246				-0.5625	Not_Neo	Zm00001d017829	Zm00001d051627
95	SORBI-3006G236700	0.0172201	Zm00001d002119	0.0721418	Zm00001d026426	0.0606252		0	13	3	0	-0.8125	Not_Neo																							Zm00001d015248				0	Not_Neo	Zm00001d017830	Zm00001d051629
96	SORBI-3006G236500	0.152681	Zm00001d002122	0.265204	Zm00001d026425	0.101157		10	0	6	0	-0.625	Not_Neo																							Zm00001d015249				-0.8	M1	Zm00001d017831	Zm00001d051632
97	SORBI-3006G236400	0.177714	Zm00001d002123	0.309598	Zm00001d026424	0.322394		0	0	1	16	0	M2																							Zm00001d015289				-0.875	Not_Neo	Zm00001d017885	#N/A
98	SORBI-3006G236000	0.136856	Zm00001d002125	0.207815	Zm00001d026421	0.593361		16	0	0	0	-1	Not_Neo																							Zm00001d015290				0.611111	Not_Neo	Zm00001d018045	#N/A
99	SORBI-3006G235300	0.234244	Zm00001d002131	#N/A	Zm00001d026414	#N/A		12	0	0	16	-1	M1																							Zm00001d015291				-0.1875	Not_Neo	Zm00001d018350	#N/A
100	SORBI-3006G234800	1002.63	Zm00001d002132	0.191088	Zm00001d026406	1.76482		14	1	1	0	0.015625	Not_Neo																							Zm00001d015383				-0.75	Not_Neo	Zm00001d018477	#N/A
101	SORBI-3006G234850	#N/A	Zm00001d002132	0.191088	Zm00001d026412	#N/A		7	0	8	16	-0.466667	M1																							Zm00001d015385				0.0625	M1_M2	Zm00001d018483	#N/A
102	SORBI-3006G235100	#N/A	Zm00001d002132	0.191088	Zm00001d026412	#N/A		8	0	8	0	-0.5	Not_Neo																							Zm00001d015386				-0.0625	Not_Neo	Zm00001d018484	#N/A
103	SORBI-3006G234900	#N/A	Zm00001d002133	2.06858	Zm00001d026406	1.76482		4	7	2	9	0.591716	M1_M2																							Zm00001d015389				-0.9375	Not_Neo	Zm00001d018485	#N/A
104	SORBI-3006G235000	0.188202	Zm00001d002133	2.06858	Zm00001d026406	1.76482		0	3	2	16	-0.6	M1_M2																							Zm00001d015394				-0.125	Not_Neo	Zm00001d018911	#N/A
105	SORBI-3006G233300	0.165154	Zm00001d002141	0.410667	Zm00001d026397	0.28273		16	0	0	0	-1	Not_Neo																							Zm00001d015395				-0.5625	Not_Neo	Zm00001d018979	#N/A
106	SORBI-3006G233500	0.135558	Zm00001d002143	0.141293	Zm00001d026398	0.233686		5	6	0	9	0.958678	M2																							Zm00001d015410				-0.8125	Not_Neo	Zm00001d019515	#N/A
107	SORBI-3006G232800	0.419236	Zm00001d002145	0.344857	Zm00001d026396	0.364992		0	14	2	0	-0.875	Not_Neo																							Zm00001d015426				-0.533333	Not_Neo	Zm00001d019520	#N/A
108	SORBI-3006G232000	0.107454	Zm00001d002149	0.212266	Zm00001d026394	0.140611		1	2	13	0	0.015625	Not_Neo																							Zm00001d015430				-0.0625	Not_Neo	Zm00001d020004	#N/A
109	SORBI-3006G232100	0.615424	Zm00001d002150	0.617987	Zm00001d026395	0.704541		4	3	9	4	0.171875	Not_Neo																							Zm00001d015431				-1	M1	Zm00001d020569	#N/A
110	SORBI-3006G231700	9.42177e-05	Zm00001d002155	0.165209	Zm00001d026392	0.145069		16	0	0	0	-1	Not_Neo																							Zm00001d015433				-1	Not_Neo	Zm00001d020580	#N/A
111	SORBI-3006G231500	0.0132085	Zm00001d002156	0.0407863	Zm00001d026391	0.0485404		0	0	16	0	0	Not_Neo																							Zm00001d015434				0.09375	Not_Neo	Zm00001d020583	#N/A
112	SORBI-3006G231600	0.184428	Zm00001d002156	0.0407863	Zm00001d026391	0.0485404		0	0	16	16	0	Not_Neo																							Zm00001d015440				0.09375	Not_Neo	Zm00001d020583	#N/A
113	SORBI-3006G230700	0.275927	Zm00001d002161	0.244159	Zm00001d026390	0.00613644	HCO3- transporter family	0	2	1	16	-0.666667	M2																							Zm00001d015442				0	Not_Neo	Zm00001d020584	#N/A
114	SORBI-3006G225300	0.745942	Zm00001d002184	0.151768	Zm00001d026361	0.22691		0	3	13	0	-0.1875	Not_Neo																							Zm00001d015557				0.265625	Not_Neo	Zm00001d020948	#N/A
115	SORBI-3006G227900	0.0670344	Zm00001d002191	0.187508	Zm00001d026377	4.84263		16	0	0	1	-1	Not_Neo																							Zm00001d015558				0	Not_Neo	Zm00001d021051	#N/A
116	SORBI-3006G228300	0.234747	Zm00001d002200	#N/A	Zm00001d026379	0.243167		7	2	1	13	0.36	M2																							Zm00001d015559				0.171875	Not_Neo	Zm00001d021069	#N/A
117	SORBI-3006G222600	0.460436	Zm00001d002241	0.394587	Zm00001d026348	0.894684		4	0	12	9	-0.25	Not_Neo																							Zm00001d015560				0	Not_Neo	Zm00001d021196	#N/A
118	SORBI-3006G222500	0.511128	Zm00001d002243	0.506886	Zm00001d026347	0.450309		0	0	16	0	0	Not_Neo																							Zm00001d015566				-0.9375	Not_Neo	Zm00001d021282	#N/A
119	SORBI-3006G222400	0.179479	Zm00001d002244	0.107033	Zm00001d026346	0.173083		15	0	1	0	-0.9375	Not_Neo																							Zm00001d015568				-0.6875	Not_Neo	Zm00001d021283	#N/A
120	SORBI-3006G221300	0.15544	Zm00001d002252	0.188706	Zm00001d026344	0.134903		0	5	11	0	-0.3125	Not_Neo																							Zm00001d015569				-0.5625	Not_Neo	Zm00001d021291	#N/A
121	SORBI-3006G221200	#N/A	Zm00001d002253	#N/A	Zm00001d026343	#N/A		0	16	0	0	-1	Not_Neo																							Zm00001d015570				-0.1875	Not_Neo	Zm00001d021363	#N/A
122	SORBI-3006G221101	0.433856	Zm00001d002255	0.183973	Zm00001d026341	0.46772		0	15	1	0	-0.9375	Not_Neo																							Zm00001d015571				0.0204082	M1	Zm00001d021494	#N/A
123	SORBI-3006G221000	0.365837	Zm00001d002256	0.083094	Zm00001d026337	0.22614		1	0	15	0	-0.0625	Not_Neo																							Zm00001d015578				0	M1_M2	Zm00001d021497	#N/A
124	SORBI-3006G220900	9.79103e-05	Zm00001d002257	0.00010277	Zm00001d026335	9.6582e-05		16	0	0	0	-1	Not_Neo																							Zm00001d015579				-0.0625	Not_Neo	Zm00001d021498	#N/A
125	SORBI-3006G220200	0.112284	Zm00001d002266	0.0670206	Zm00001d026334	0.12516		14	0	2	0	-0.875	Not_Neo																							Zm00001d015581				-0.125	Not_Neo	Zm00001d021507	#N/A
126	SORBI-3006G220000	0.204367	Zm00001d002267	0.231928	Zm00001d026333	0.208727		0	1	15	0	-0.0625	Not_Neo																							Zm00001d015612				-0.25	Not_Neo	Zm00001d021508	#N/A
127	SORBI-3006G219600	0.418342	Zm00001d002272	0.189176	Zm00001d026331	0.258083		6	0	10	0	-0.375	Not_Neo																							Zm00001d015613				-0.375	Not_Neo	Zm00001d021512	#N/A
128	SORBI-3006G219100	0.44144	Zm00001d002278	0.27483	Zm00001d026329	0.592138		7	1	8	0	0.015625	Not_Neo																							Zm00001d015614				0	Not_Neo	Zm00001d021541	#N/A
129	SORBI-3006G218700	0.240334	Zm00001d002283	0.135913	Zm00001d026322	0.063114		9	0	7	0	-0.5625	Not_Neo																							Zm00001d015623				0	Not_Neo	Zm00001d021551	#N/A
130	SORBI-3006G218400	0.306243	Zm00001d002284	9.97252e-05	Zm00001d026321	0.139726		16	0	0	0	-1	Not_Neo																							Zm00001d015626				-0.6875	Not_Neo	Zm00001d021553	#N/A
131	SORBI-3006G218600	0.187918	Zm00001d002284	9.97252e-05	Zm00001d026321	0.139726		16	0	0	0	-1	Not_Neo																							Zm00001d015627				0	Not_Neo	Zm00001d021554	#N/A
132	SORBI-3006G218000	0.253707	Zm00001d002286	0.224569	Zm00001d026318	0.254748		0	13	3	9	-0.8125	Not_Neo																							Zm00001d015628				0	Not_Neo	Zm00001d021557	#N/A
133	SORBI-3006G217300	0.117269	Zm00001d002292	0.131876	Zm00001d026311	0.0753515		0	0	16	0	0	Not_Neo																							Zm00001d015635				0.213333	Not_Neo	Zm00001d021571	#N/A
134	SORBI-3006G215600	0.293854	Zm00001d002312	0.385272	Zm00001d026306	0.259764		4	4	8	0	0.25	Not_Neo																							Zm00001d015636				0.04	M1_M2	Zm00001d021571	#N/A
135	SORBI-3006G215400	0.221938	Zm00001d002313	0.370381	Zm00001d026306	0.259764		11	1	2	6	0.0204082	M1_M2																							Zm00001d015637				0.04	M1_M2	Zm00001d021571	#N/A
136	SORBI-3006G215100	0.12207	Zm00001d002315	0.395597	Zm00001d026302	0.344675		0	7	9	0	-0.4375	Not_Neo																							Zm00001d015638				0	M1	Zm00001d021573	#N/A
137	SORBI-3006G215000	0.21617	Zm00001d002316	0.307543	Zm00001d026300	0.276697	Alpha mannosidase middle domain	15	0	1	0	-0.9375	Not_Neo																							Zm00001d015639				0	M1	Zm00001d021573	#N/A
138	SORBI-3006G214600	0.350442	Zm00001d002318	0.326435	Zm00001d026297	0.294399		0	14	0	13	-1	M2																							Zm00001d015767				-1	Not_Neo	Zm00001d021574	#N/A
139	SORBI-3006G214400	0.0637663	Zm00001d002323	0.14529	Zm00001d026296	0.211358		0	14	2	0	-0.875	Not_Neo																							Zm00001d015772				-1	Not_Neo	Zm00001d021576	#N/A
140	SORBI-3006G214300	0.4509	Zm00001d002325	#N/A	Zm00001d026295	#N/A		16	0	0	0	-1	Not_Neo																							Zm00001d015778				0.641975	Not_Neo	Zm00001d021577	#N/A
141	SORBI-3006G214200	0.0662974	Zm00001d002326	0.0627213	Zm00001d026293	0.144317		8	0	8	0	-0.5	Not_Neo																							Zm00001d015780				0	Not_Neo	Zm00001d021609	#N/A
142	SORBI-3006G214000	#N/A	Zm00001d002330	#N/A	Zm00001d026291	#N/A	TatD related DNase	0	1	15	0	-0.0625	Not_Neo																							Zm00001d015783				-0.5625	Not_Neo	Zm00001d021610	#N/A
143	SORBI-3006G213700	0.132532	Zm00001d002332	0.123137	Zm00001d026290	0.172336	DTW domain	16	0	0	3	-1	Not_Neo																							Zm00001d015785				0	Not_Neo	Zm00001d021806	#N/A
144	SORBI-3006G213800	0.106881	Zm00001d002332	0.123137	Zm00001d026290	0.172336	DTW domain	16	0	0	0	-1	Not_Neo																							Zm00001d015788				-1	Not_Neo	Zm00001d021810	Zm00001d006606
145	SORBI-3006G213500	0.212453	Zm00001d002333	0.160788	Zm00001d026289	0.117576		11	0	1	15	-0.916667	M1																							Zm00001d015789				-0.0625	Not_Neo	Zm00001d021932	#N/A
146	SORBI-3006G213100	0.169259	Zm00001d002338	0.104527	Zm00001d026287	0.0107752		16	0	0	0	-1	Not_Neo																							Zm00001d015791				-0.9375	Not_Neo	Zm00001d021934	#N/A
147	SORBI-3006G213000	9.42433e-05	Zm00001d002339	9.93496e-05	Zm00001d026286	0.000101985		0	0	16	0	0	Not_Neo																							Zm00001d015795				-1	Not_Neo	Zm00001d021952	#N/A
148	SORBI-3006G212800	0.357647	Zm00001d002341	0.156122	Zm00001d026285	0.0468976		1	15	0	10	0.015625	Not_Neo																							Zm00001d015798				-0.9375	Not_Neo	Zm00001d021954	#N/A
149	SORBI-3006G212100	0.0810176	Zm00001d002344	#N/A	Zm00001d026284	#N/A		16	0	0	0	-1	Not_Neo																							Zm00001d015802				-1	Not_Neo	Zm00001d022085	#N/A
150	SORBI-3006G211600	0.239528	Zm00001d002348	0.288033	Zm00001d026281	0.485318		4	1	1	16	0.111111	M1_M2																							Zm00001d015804				-0.875	Not_Neo	Zm00001d022275	#N/A
151	SORBI-3006G211200	9.8103e-05	Zm00001d002352	0.104039	Zm00001d026278	0.0693466		0	16	0	0	-1	Not_Neo																							Zm00001d015810				0	Not_Neo	Zm00001d022481	#N/A
152	SORBI-3006G210800	0.0486839	Zm00001d002358	0.411346	Zm00001d026277	0.442979		16	0	0	0	-1	Not_Neo																							Zm00001d015815				-0.375	Not_Neo	Zm00001d022573	#N/A
153	SORBI-3006G210300	0.165678	Zm00001d002364	0.980439	Zm00001d026271	0.227813		0	15	1	0	-0.9375	Not_Neo																							Zm00001d015816				-0.916667	M1	Zm00001d022575	Zm00001d007216
154	SORBI-3006G209400	0.196774	Zm00001d002369	0.213122	Zm00001d026269	0.172895		0	5	11	0	-0.3125	Not_Neo																							Zm00001d015825				0	Not_Neo	Zm00001d022629	Zm00001d006235
155	SORBI-3006G209300	0.0564637	Zm00001d002370	0.166515	Zm00001d026268	0.131451	Helix-loop-helix DNA-binding domain	5	0	2	15	-0.714286	M1																							Zm00001d015829				0.0177778	Not_Neo	Zm00001d022647	Zm00001d006232
156	SORBI-3006G208900	0.0396953	Zm00001d002371	0.0702163	Zm00001d026267	0.0916242		0	0	16	0	0	Not_Neo																							Zm00001d015837				-1	Not_Neo	Zm00001d023560	#N/A
157	SORBI-3006G208500	0.0551335	Zm00001d002373	0.122776	Zm00001d026265	0.134084		0	7	9	0	-0.4375	Not_Neo																							Zm00001d015839				-0.25	Not_Neo	Zm00001d023867	#N/A
158	SORBI-3006G208300	0.0391011	Zm00001d002374	#N/A	Zm00001d026262	#N/A		1	2	13	0	0.015625	Not_Neo																							Zm00001d015842				-0.9375	Not_Neo	Zm00001d023904	#N/A
159	SORBI-3006G207900	0.157034	Zm00001d002382	0.300285	Zm00001d026261	0.160231		16	0	0	0	-1	Not_Neo																							Zm00001d015844				-0.875	Not_Neo	Zm00001d023912	#N/A
160	SORBI-3006G207600	0.258514	Zm00001d002386	0.544595	Zm00001d026260	0.223892		4	0	12	0	-0.25	Not_Neo																							Zm00001d015852				0.015625	Not_Neo	Zm00001d023914	#N/A
161	SORBI-3006G207500	0.549179	Zm00001d002387	0.701991	Zm00001d026259	1.13438		14	0	2	0	-0.875	Not_Neo																							Zm00001d015853				-0.4	M1_M2	Zm00001d024528	#N/A
162	SORBI-3006G207200	0.178661	Zm00001d002388	0.0788947	Zm00001d026257	0.200325		0	0	16	0	0	Not_Neo																							Zm00001d015868				-1	Not_Neo	Zm00001d024532	#N/A
163	SORBI-3006G207400	0.116401	Zm00001d002391	0.0663555	Zm00001d026258	0.0421502		11	0	5	0	-0.6875	Not_Neo																							Zm00001d016136				-0.875	Not_Neo	Zm00001d024661	#N/A
164	SORBI-3006G206500	0.124067	Zm00001d002395	0.0438331	Zm00001d026254	0.0480182		0	0	10	16	0	M2																							Zm00001d016137				-0.6875	Not_Neo	Zm00001d027329	#N/A
165	SORBI-3006G206800	0.108745	Zm00001d002396	0.177365	Zm00001d026253	0.153084		15	0	1	0	-0.9375	Not_Neo																							Zm00001d016394				0.0204082	Not_Neo	Zm00001d027645	#N/A
166	SORBI-3006G206000	0.0920201	Zm00001d002405	0.149571	Zm00001d026252	0.141371		0	15	1	0	-0.9375	Not_Neo																							Zm00001d016395				0.231111	Not_Neo	Zm00001d027864	#N/A
167	SORBI-3006G205700	0.0989003	Zm00001d002409	0.160892	Zm00001d026251	0.00231577		0	4	12	0	-0.25	Not_Neo																							Zm00001d016446				-0.875	Not_Neo	Zm00001d027868	#N/A
168	SORBI-3006G205600	0.0442318	Zm00001d002410	0.174551	Zm00001d026250	0.178658	Transcription factor TFIID (or TATA-binding protein, TBP)	16	0	0	4	-1	Not_Neo																							Zm00001d016452				-1	Not_Neo	Zm00001d027922	#N/A
169	SORBI-3006G205500	0.116952	Zm00001d002412	0.0987477	Zm00001d026251	0.00231577		0	11	0	15	-1	M2																							Zm00001d016453				-0.5625	Not_Neo	Zm00001d027962	#N/A
170	SORBI-3006G205100	0.0739553	Zm00001d002416	0.34624	Zm00001d026248	0.446221		14	0	2	7	-0.875	Not_Neo																							Zm00001d016456				-1	M1	Zm00001d028118	#N/A
171	SORBI-3006G204900	0.222285	Zm00001d002418	0.301524	Zm00001d026246	0.409953		0	0	16	0	0	Not_Neo																							Zm00001d016471				-0.875	Not_Neo	Zm00001d028130	#N/A
172	SORBI-3006G204300	0.101769	Zm00001d002424	0.376551	Zm00001d026245	0.262845		1	3	12	9	0.015625	Not_Neo																							Zm00001d016472				0.285714	Not_Neo	Zm00001d028162	#N/A
173	SORBI-3006G204200	0.610227	Zm00001d002425	0.503974	Zm00001d026244	0.217399		0	15	1	0	-0.9375	Not_Neo																							Zm00001d016473				-0.9375	Not_Neo	Zm00001d028167	#N/A
174	SORBI-3006G203400	0.086458	Zm00001d002429	0.22579	Zm00001d026240	0.157355	Alpha mannosidase middle domain	3	0	1	16	-0.75	M1_M2																							Zm00001d016474				0	M1_M2	Zm00001d028167	#N/A
175	SORBI-3006G203300	9.43931e-05	Zm00001d002431	0.355487	Zm00001d026239	0.0428638		0	16	0	0	-1	Not_Neo																							Zm00001d016475				0	Not_Neo	Zm00001d028227	#N/A
176	SORBI-3006G203200	0.151743	Zm00001d002432	0.168746	Zm00001d026237	#N/A		7	1	0	14	0.0625	M1																							Zm00001d016520				-0.866667	M1	Zm00001d028304	Zm00001d047995
177	SORBI-3006G201800	0.187994	Zm00001d002444	0.641058	Zm00001d026235	0.48755		0	9	4	0	-0.692308	Not_Neo																							Zm00001d016528				-0.3125	Not_Neo	Zm00001d028352	#N/A
178	SORBI-3006G201500	0.123306	Zm00001d002450	0.0160242	Zm00001d026224	#N/A	NTPase	16	0	0	0	-1	Not_Neo																							Zm00001d016593				-0.0625	Not_Neo	Zm00001d028412	#N/A
179	SORBI-3006G201400	0.0733999	Zm00001d002451	0.236126	Zm00001d026223	0.363715		16	0	0	0	-1	Not_Neo																							Zm00001d016595				0.0493827	M1	Zm00001d028413	Zm00001d047921
180	SORBI-3006G201000	0.0896719	Zm00001d002452	0.338673	Zm00001d026218	0.511649		14	0	2	1	-0.875	Not_Neo																							Zm00001d016602				0	Not_Neo	Zm00001d028481	#N/A
181	SORBI-3006G200600	0.241214	Zm00001d002456	0.265765	Zm00001d026212	0.0885218		0	3	13	0	-0.1875	Not_Neo																							Zm00001d016604				-0.3125	Not_Neo	Zm00001d028513	#N/A
182	SORBI-3006G200000	0.287908	Zm00001d002475	0.352497	Zm00001d026206	#N/A		10	0	6	0	-0.625	Not_Neo																							Zm00001d016607				-0.75	Not_Neo	Zm00001d028514	#N/A
183	SORBI-3006G199800	0.212436	Zm00001d002476	0.145749	Zm00001d026203	0.217648		2	4	5	10	0.198347	M1_M2																							Zm00001d016876				-1	Not_Neo	Zm00001d028711	Zm00001d047758
184	SORBI-3006G199000	0.466924	Zm00001d002479	0.301985	Zm00001d026200	0.335286	1,3-beta-glucan synthase component	8	3	2	8	0.449704	Not_Neo																							Zm00001d016878				-0.25	Not_Neo	Zm00001d028712	Zm00001d047755
185	SORBI-3006G199100	0.455148	Zm00001d002479	0.301985	Zm00001d026200	0.335286	1,3-beta-glucan synthase component	7	3	2	15	0.472222	M1																							Zm00001d016879				-1	Not_Neo	Zm00001d028813	#N/A
186	SORBI-3006G198600	0.200081	Zm00001d002483	0.231034	Zm00001d026195	0.188359		0	0	16	0	0	Not_Neo																							Zm00001d016882				-0.75	Not_Neo	Zm00001d028890	#N/A
187	SORBI-3006G198300	0.508866	Zm00001d002485	0.261596	Zm00001d026193	0.296111		0	0	16	0	0	Not_Neo																							Zm00001d016885				0	Not_Neo	Zm00001d028898	#N/A
188	SORBI-3006G197800	0.0831293	Zm00001d002489	0.148332	Zm00001d026047	0.212762		0	10	6	0	-0.625	Not_Neo																							Zm00001d016890				-1	Not_Neo	Zm00001d029105	#N/A
189	SORBI-3006G197400	0.357505	Zm00001d002492	#N/A	Zm00001d026046	#N/A		3	6	3	14	0.416667	Not_Neo																							Zm00001d016891				-0.875	Not_Neo	Zm00001d029107	#N/A
190	SORBI-3006G197500	0.705152	Zm00001d002492	#N/A	Zm00001d026046	#N/A		0	3	3	16	-0.5	M1_M2																							Zm00001d017019				-1	Not_Neo	Zm00001d029124	#N/A
191	SORBI-3006G197100	0.0376478	Zm00001d002495	0.103675	Zm00001d026035	0.0784524		13	0	3	0	-0.8125	Not_Neo																							Zm00001d017171				-0.8125	Not_Neo	Zm00001d029201	#N/A
192	SORBI-3006G196400	0.1462	Zm00001d002498	0.148659	Zm00001d026040	0.0673703		8	1	2	16	0.0330579	M1																							Zm00001d017174				-1	Not_Neo	Zm00001d030760	#N/A
193	SORBI-3006G194200	0.122037	Zm00001d002520	0.151259	Zm00001d026029	0.0887121	Ribosomal large subunit proteins 60S L5, and 50S L18	3	7	6	0	0.265625	Not_Neo																							Zm00001d017175				0.0625	M1_M2	Zm00001d030782	#N/A
194	SORBI-3006G194300	0.168293	Zm00001d002520	0.151259	Zm00001d026029	0.0887121	Ribosomal large subunit proteins 60S L5, and 50S L18	3	7	6	0	0.265625	Not_Neo																							Zm00001d017263				-0.875	Not_Neo	Zm00001d030985	#N/A
195	SORBI-3006G194100	1011.58	Zm00001d002521	0.130924	Zm00001d026028	0.164479		15	0	1	0	-0.9375	Not_Neo																							Zm00001d017330				-0.9375	Not_Neo	Zm00001d030990	#N/A
196	SORBI-3006G194000	0.222462	Zm00001d002522	0.151259	Zm00001d026028	0.164479		3	3	8	16	0.183673	M2																							Zm00001d017422				-0.1875	Not_Neo	Zm00001d031005	#N/A
197	SORBI-3006G193700	0.209148	Zm00001d002523	0.371434	Zm00001d026028	0.164479		2	0	0	16	-1	M1																							Zm00001d017516				NA	Not_Neo	Zm00001d031109	#N/A
198	SORBI-3006G193900	0.0585685	Zm00001d002523	0.371434	Zm00001d026029	0.0887121		16	0	0	0	-1	Not_Neo																							Zm00001d017518				-0.5625	Not_Neo	Zm00001d031420	#N/A
199	SORBI-3006G193600	0.950512	Zm00001d002530	0.0773764	Zm00001d026026	0.367538	Ubiquitin family	0	16	0	2	-1	Not_Neo																							Zm00001d017829				0.0177778	M2	Zm00001d031451	#N/A
200	SORBI-3006G193000	0.0471993	Zm00001d002535	0.436804	Zm00001d026021	0.385149		15	0	1	0	-0.9375	Not_Neo																							Zm00001d017830				0.373333	Not_Neo	Zm00001d031577	#N/A
201	SORBI-3006G192800	0.320403	Zm00001d002537	0.520865	Zm00001d026020	0.596996	Gibberellin regulated protein	13	0	3	0	-0.8125	Not_Neo																							Zm00001d017831				-0.1875	Not_Neo	Zm00001d031627	#N/A
202	SORBI-3006G192500	0.115809	Zm00001d002540	0.143726	Zm00001d026018	0.148383	Probable RNA and SrmB- binding site of polymerase A	0	7	9	0	-0.4375	Not_Neo																							Zm00001d017885				0.0177778	M1	Zm00001d031634	#N/A
203	SORBI-3006G192100	0.71147	Zm00001d002545	0.499905	Zm00001d026017	0.636205		9	2	5	13	0.171875	Not_Neo																							Zm00001d017886				-1	Not_Neo	Zm00001d031740	#N/A
204	SORBI-3006G191800	9.9345e-05	Zm00001d002546	0.000102332	Zm00001d026015	0.000100993		0	0	16	0	0	Not_Neo																							Zm00001d018045				-1	Not_Neo	Zm00001d032239	#N/A
205	SORBI-3006G191700	0.0176687	Zm00001d002548	0.0776368	Zm00001d026014	0.0574622		0	5	11	0	-0.3125	Not_Neo																							Zm00001d018318				-1	Not_Neo	Zm00001d032306	#N/A
206	SORBI-3006G191600	0.0979206	Zm00001d002549	0.0050277	Zm00001d026012	0.723116		12	0	4	1	-0.75	Not_Neo																							Zm00001d018350				-0.625	Not_Neo	Zm00001d032311	#N/A
207	SORBI-3006G191000	0.357606	Zm00001d002553	0.442392	Zm00001d026010	0.300627	Leucine rich repeat	0	6	6	14	-0.5	M1_M2																							Zm00001d018355				0.111111	M1_M2	Zm00001d032610	#N/A
208	SORBI-3006G191200	0.158216	Zm00001d002553	0.442392	Zm00001d026010	0.300627	Leucine rich repeat	1	9	6	1	0.015625	Not_Neo																							Zm00001d018477				-0.375	Not_Neo	Zm00001d032672	#N/A
209	SORBI-3006G190400	0.139708	Zm00001d002562	0.191214	Zm00001d026005	0.311863		10	0	1	16	-0.909091	M1																							Zm00001d018478				-0.8	M2	Zm00001d032696	#N/A
210	SORBI-3006G190100	0.0809288	Zm00001d002564	0.0550779	Zm00001d026003	0.060059		14	0	0	8	-1	M1																							Zm00001d018482				-0.5625	Not_Neo	Zm00001d032699	#N/A
211	SORBI-3006G189700	0.0585969	Zm00001d002568	0.179986	Zm00001d026002	0.275458		0	5	1	15	-0.833333	M2																							Zm00001d018483				-0.25	Not_Neo	Zm00001d032703	#N/A
212	SORBI-3006G188900	0.245736	Zm00001d002573	0.102487	Zm00001d026050	0.114789		14	0	2	0	-0.875	Not_Neo																							Zm00001d018484				0	Not_Neo	Zm00001d032708	#N/A
213	SORBI-3006G188700	0.153924	Zm00001d002576	0.334425	Zm00001d026053	0.275445		16	0	0	0	-1	Not_Neo																							Zm00001d018485				-1	Not_Neo	Zm00001d032822	#N/A
214	SORBI-3006G188600	0.0566569	Zm00001d002579	0.0849946	Zm00001d026055	0.0964454		6	1	9	1	0.015625	Not_Neo																							Zm00001d018738				-0.333333	M2	Zm00001d032948	#N/A
215	SORBI-3006G188200	0.382877	Zm00001d002589	0.106284	Zm00001d026056	0.216075		0	11	5	0	-0.6875	Not_Neo																							Zm00001d018890				-0.866667	M1	Zm00001d033044	#N/A
216	SORBI-3006G187900	0.055075	Zm00001d002592	0.138071	Zm00001d026060	0.171576	Protein of unknown function (DUF1218)	0	6	7	10	-0.461538	M1_M2																							Zm00001d019067				0	M1	Zm00001d033048	#N/A
217	SORBI-3006G187600	0.406331	Zm00001d002594	0.286536	Zm00001d026061	0.447619		1	11	1	16	0.0236686	M2																							Zm00001d019262				-0.25	Not_Neo	Zm00001d033049	#N/A
218	SORBI-3006G187000	0.124432	Zm00001d002599	0.0644238	Zm00001d026063	0.108962		6	0	3	16	-0.666667	M1																							Zm00001d019510				0	M2	Zm00001d033050	#N/A
219	SORBI-3006G186800	0.683722	Zm00001d002600	0.330608	Zm00001d026064	0.340665	Arabidopsis protein of unknown function	8	0	7	8	-0.533333	M1																							Zm00001d019515				-0.25	Not_Neo	Zm00001d033050	#N/A
220	SORBI-3006G186100	0.31508	Zm00001d002609	0.119948	Zm00001d026066	0.109667		10	2	2	15	0.244898	M1																							Zm00001d019518				0	M2	Zm00001d033050	#N/A
221	SORBI-3006G186200	0.844215	Zm00001d002609	0.119948	Zm00001d026066	0.109667		12	2	2	8	0.21875	Not_Neo																							Zm00001d019520				-0.125	Not_Neo	Zm00001d033054	#N/A
222	SORBI-3006G185900	0.122931	Zm00001d002610	0.135402	Zm00001d026067	0.115891	Protein tyrosine kinase	8	1	6	10	0.0177778	M2																							Zm00001d019525				-0.6875	Not_Neo	Zm00001d033130	#N/A
223	SORBI-3006G186000	0.0844796	Zm00001d002610	0.135402	Zm00001d026067	0.115891	Protein tyrosine kinase	6	2	6	14	0.163265	M1																							Zm00001d019994				-0.625	Not_Neo	Zm00001d033344	#N/A
224	SORBI-3006G184400	0.188257	Zm00001d002623	0.0704984	Zm00001d026076	0.103229		11	0	1	15	-0.916667	M1																							Zm00001d020001				0.015625	Not_Neo	Zm00001d033451	#N/A
225	SORBI-3006G184100	0.0640023	Zm00001d002625	0.12411	Zm00001d026079	0.129775		0	12	4	0	-0.75	Not_Neo																							Zm00001d020002				-0.5	Not_Neo	Zm00001d033549	#N/A
226	SORBI-3006G183900	0.161535	Zm00001d002629	#N/A	Zm00001d026083	#N/A		3	3	10	0	0.140625	Not_Neo																							Zm00001d020003				-1	Not_Neo	Zm00001d033602	#N/A
227	SORBI-3006G183600	0.0832224	Zm00001d002630	#N/A	Zm00001d026084	#N/A		0	15	1	0	-0.9375	Not_Neo																							Zm00001d020004				-0.9375	Not_Neo	Zm00001d033615	#N/A
228	SORBI-3006G183000	0.759745	Zm00001d002639	#N/A	Zm00001d026091	#N/A		0	0	16	0	0	Not_Neo																							Zm00001d020430				-1	Not_Neo	Zm00001d033623	#N/A
229	SORBI-3006G182300	0.21141	Zm00001d002642	#N/A	Zm00001d026096	0.360013		0	13	3	0	-0.8125	Not_Neo																							Zm00001d020431				-0.909091	M1	Zm00001d033624	#N/A
230	SORBI-3006G181800	0.453614	Zm00001d002644	0.334059	Zm00001d026103	0.543634		16	0	0	0	-1	Not_Neo																							Zm00001d020432				-0.9375	Not_Neo	Zm00001d033624	#N/A
231	SORBI-3006G181000	0.0765373	Zm00001d002650	0.109224	Zm00001d026111	0.211837	4-alpha-glucanotransferase	8	0	8	0	-0.5	Not_Neo																							Zm00001d020433				0.015625	Not_Neo	Zm00001d033674	#N/A
232	SORBI-3006G180900	0.107836	Zm00001d002654	0.0821096	Zm00001d026113	0.181644		16	0	0	0	-1	Not_Neo																							Zm00001d020435				-1	M2	Zm00001d033717	#N/A
233	SORBI-3006G179200	0.574712	Zm00001d002662	0.207769	Zm00001d026129	0.547826		0	6	10	0	-0.375	Not_Neo																							Zm00001d020436				0.015625	Not_Neo	Zm00001d033718	#N/A
234	SORBI-3006G178800	0.251996	Zm00001d002669	0.242046	Zm00001d026130	0.29734		15	0	1	6	-0.9375	Not_Neo																							Zm00001d020437				-1	M2	Zm00001d033951	#N/A
235	SORBI-3006G178500	0.183103	Zm00001d002673	0.0933349	Zm00001d026131	0.147908		14	0	0	7	-1	M1																							Zm00001d020438				-0.125	Not_Neo	Zm00001d033986	#N/A
236	SORBI-3006G174850	0.308638	Zm00001d002703	0.329772	Zm00001d026153	0.433908		1	0	15	3	-0.0625	Not_Neo																							Zm00001d020461				-1	Not_Neo	Zm00001d034062	#N/A
237	SORBI-3006G173900	9.58947e-05	Zm00001d002704	0.914078	Zm00001d026154	0.75208		16	0	0	0	-1	Not_Neo																							Zm00001d020563				-1	Not_Neo	Zm00001d034188	#N/A
238	SORBI-3006G172900	#N/A	Zm00001d002718	#N/A	Zm00001d026158	#N/A		4	1	11	0	0.015625	Not_Neo																							Zm00001d020569				1	M2	Zm00001d034379	#N/A
239	SORBI-3006G172800	1.05023	Zm00001d002720	0.383963	Zm00001d026159	0.74491	AMP-binding enzyme	0	0	1	16	0	M1_M2																							Zm00001d020573				0.015625	Not_Neo	Zm00001d034380	#N/A
240	SORBI-3006G172200	0.0652279	Zm00001d002725	0.205678	Zm00001d026165	0.230779		0	15	1	0	-0.9375	Not_Neo																							Zm00001d020577				-1	M2	Zm00001d034425	#N/A
241	SORBI-3006G170500	0.41762	Zm00001d002738	0.00280869	Zm00001d026178	0.00285868		2	7	2	15	0.297521	M2																							Zm00001d020578				-0.1875	Not_Neo	Zm00001d034590	#N/A
242	SORBI-3006G170600	0.0719203	Zm00001d002738	0.00280869	Zm00001d026177	0.00285868		0	16	0	0	-1	Not_Neo																							Zm00001d020580				-0.625	Not_Neo	Zm00001d034835	#N/A
243	SORBI-3006G170700	#N/A	Zm00001d002739	#N/A	Zm00001d026176	#N/A		0	1	15	0	-0.0625	Not_Neo																							Zm00001d020583				0	Not_Neo	Zm00001d034885	#N/A
244	SORBI-3006G171050	0.194002	Zm00001d002743	0.224046	Zm00001d026173	#N/A		5	1	1	16	0.0816327	M1_M2																							Zm00001d020584				-1	Not_Neo	Zm00001d035304	#N/A
245	SORBI-3006G170100	0.165553	Zm00001d002744	0.473847	Zm00001d026182	#N/A		1	2	4	16	0.0816327	M2																							Zm00001d020586				-0.5	Not_Neo	Zm00001d035323	#N/A
246	SORBI-3006G170000	0.161663	Zm00001d002747	0.392179	Zm00001d026182	#N/A		1	3	7	9	0.0330579	M2																							Zm00001d020590				-0.6875	Not_Neo	Zm00001d037503	#N/A
247	SORBI-3006G169900	0.151935	Zm00001d002748	0.150605	Zm00001d026184	#N/A		16	0	0	6	-1	Not_Neo																							Zm00001d020591				-0.125	Not_Neo	Zm00001d037596	#N/A
248	SORBI-3006G168800	0.0578374	Zm00001d002757	0.280553	Zm00001d026189	#N/A		0	8	8	0	-0.5	Not_Neo																							Zm00001d020592				-1	Not_Neo	Zm00001d038088	#N/A
249	SORBI-3006G168400	0.344787	Zm00001d002758	0.211417	Zm00001d026190	#N/A		0	5	11	0	-0.3125	Not_Neo																							Zm00001d020609				0	Not_Neo	Zm00001d038092	#N/A
250	SORBI-3006G167800	0.0507801	Zm00001d002762	0.25534	Zm00001d026191	#N/A		0	3	13	0	-0.1875	Not_Neo																							Zm00001d020980				-1	Not_Neo	Zm00001d038136	#N/A
251	SORBI-3006G165000	0.113117	Zm00001d002781	0.303315	Zm00001d025981	0.304769		16	0	0	0	-1	Not_Neo																							Zm00001d021263				-1	Not_Neo	Zm00001d038136	#N/A
252	SORBI-3006G165100	0.0534771	Zm00001d002782	0.147516	Zm00001d025982	0.0946507		14	0	2	0	-0.875	Not_Neo																							Zm00001d021266				-1	Not_Neo	Zm00001d038136	#N/A
253	SORBI-3006G165501	0.549735	Zm00001d002784	0.875068	Zm00001d025985	0.913711		0	2	2	16	-0.5	M2																							Zm00001d021290				-0.833333	M1	Zm00001d038203	Zm00001d010256
254	SORBI-3006G166100	0.459904	Zm00001d002790	0.404953	Zm00001d025988	0.515759	Glutathione S-transferase, C-terminal domain	3	2	11	0	0.078125	Not_Neo																							Zm00001d021291				-1	M1_M2	Zm00001d038263	#N/A
255	SORBI-3006G166400	0.14868	Zm00001d002796	1.75228	Zm00001d025991	0.102456		7	1	8	0	0.015625	Not_Neo																							Zm00001d021294				0.189349	M1_M2	Zm00001d038608	#N/A
256	SORBI-3006G164200	0.284219	Zm00001d002797	0.182077	Zm00001d025977	0.0337406		0	10	2	15	-0.833333	M2																							Zm00001d021295				-0.125	Not_Neo	Zm00001d038672	#N/A
257	SORBI-3006G164300	0.0900945	Zm00001d002797	0.182077	Zm00001d025977	0.0337406		0	14	2	0	-0.875	Not_Neo																							Zm00001d021296				-0.5625	Not_Neo	Zm00001d038732	#N/A
258	SORBI-3006G164100	0.150181	Zm00001d002798	0.177736	Zm00001d025967	0.13554		6	1	1	15	0.0625	M1																							Zm00001d021297				0	Not_Neo	Zm00001d038892	#N/A
259	SORBI-3006G163600	0.128375	Zm00001d002801	0.148557	Zm00001d025960	#N/A	Glycine cleavage H-protein	10	3	3	0	0.359375	Not_Neo																							Zm00001d021298				0.015625	Not_Neo	Zm00001d039488	#N/A
260	SORBI-3006G163401	0.145684	Zm00001d002802	0.147315	Zm00001d025959	0.00706387		14	0	2	5	-0.875	Not_Neo																							Zm00001d021450				-1	Not_Neo	Zm00001d039510	#N/A
261	SORBI-3006G163100	0.058244	Zm00001d002806	0.244224	Zm00001d025957	0.220904		3	4	9	10	0.171875	Not_Neo																							Zm00001d021494				-0.75	Not_Neo	Zm00001d039682	#N/A
262	SORBI-3006G163000	0.127386	Zm00001d002810	0.24782	Zm00001d025955	0.325501	Glutathione S-transferase, C-terminal domain	16	0	0	0	-1	Not_Neo																							Zm00001d021497				0	Not_Neo	Zm00001d039686	#N/A
263	SORBI-3006G162800	0.188419	Zm00001d002811	0.28176	Zm00001d025953	0.144671		1	0	15	0	-0.0625	Not_Neo																							Zm00001d021498				-0.9375	Not_Neo	Zm00001d039691	#N/A
264	SORBI-3006G162200	0.191796	Zm00001d002815	0.076023	Zm00001d025952	0.1668		0	0	3	16	0	M1_M2																							Zm00001d021506				-0.0625	Not_Neo	Zm00001d039867	#N/A
265	SORBI-3006G162000	0.230376	Zm00001d002817	0.477821	Zm00001d025951	0.353096		0	16	0	0	-1	Not_Neo																							Zm00001d021507				0	Not_Neo	Zm00001d039871	#N/A
266	SORBI-3006G161900	0.166917	Zm00001d002819	0.328631	Zm00001d025950	0.338359	Maf1 regulator	2	2	12	0	0.0625	Not_Neo																							Zm00001d021508				-1	Not_Neo	Zm00001d040163	#N/A
267	SORBI-3006G161500	0.182871	Zm00001d002822	0.152177	Zm00001d025948	0.0927039		14	0	2	3	-0.875	Not_Neo																							Zm00001d021512				-0.5	Not_Neo	Zm00001d040164	#N/A
268	SORBI-3006G161000	0.186308	Zm00001d002827	0.247569	Zm00001d025946	0.102607		0	1	15	0	-0.0625	Not_Neo																							Zm00001d021513				-0.4375	Not_Neo	Zm00001d040169	#N/A
269	SORBI-3006G160700	0.185215	Zm00001d002830	0.200863	Zm00001d025943	#N/A	Helix-loop-helix DNA-binding domain	0	15	1	2	-0.9375	Not_Neo																							Zm00001d021514				-0.933333	M1	Zm00001d040594	#N/A
270	SORBI-3006G159300	9.59222e-05	Zm00001d002842	0.289115	Zm00001d025932	0.680057		16	0	0	0	-1	Not_Neo																							Zm00001d021541				-0.25	Not_Neo	Zm00001d040596	#N/A
271	SORBI-3006G158600	0.134611	Zm00001d002847	0.279591	Zm00001d025922	0.255261		0	12	4	0	-0.75	Not_Neo																							Zm00001d021542				-1	Not_Neo	Zm00001d042056	#N/A
272	SORBI-3006G158700	0.26786	Zm00001d002847	0.279591	Zm00001d025923	0.467093		1	0	0	16	-1	M1																							Zm00001d021544				-1	M1	Zm00001d042056	#N/A
273	SORBI-3006G158800	0.254752	Zm00001d002847	0.279591	Zm00001d025924	0.140969		2	0	0	16	-1	M1																							Zm00001d021546				-1	M1	Zm00001d042056	#N/A
274	SORBI-3006G158400	0.166326	Zm00001d002848	0.248862	Zm00001d025922	0.255261		0	16	0	0	-1	Not_Neo																							Zm00001d021551				-1	Not_Neo	Zm00001d042302	#N/A
275	SORBI-3006G158000	#N/A	Zm00001d002849	#N/A	Zm00001d025918	#N/A		3	6	5	15	0.306122	Not_Neo																							Zm00001d021553				-1	Not_Neo	Zm00001d042303	Zm00001d011984
276	SORBI-3006G157500	1.00178	Zm00001d002856	0.425588	Zm00001d025916	0.260181		1	8	7	0	0.015625	Not_Neo																							Zm00001d021554				0.015625	Not_Neo	Zm00001d042305	Zm00001d011985
277	SORBI-3006G156300	0.361007	Zm00001d002865	0.449265	Zm00001d025911	0.306476		11	0	5	0	-0.6875	Not_Neo																							Zm00001d021557				0.140625	Not_Neo	Zm00001d042380	#N/A
278	SORBI-3006G155900	0.237361	Zm00001d002869	0.316081	Zm00001d025908	0.158362		7	0	9	2	-0.4375	Not_Neo																							Zm00001d021562				-1	Not_Neo	Zm00001d042453	#N/A
279	SORBI-3006G275800	0.289501	Zm00001d002880	0.0731998	Zm00001d026675	0.153668		0	0	16	0	0	Not_Neo																							Zm00001d021571				-1	Not_Neo	Zm00001d042585	#N/A
280	SORBI-3006G276200	0.228248	Zm00001d002882	0.136998	Zm00001d026678	0.0955404		14	0	2	0	-0.875	Not_Neo																							Zm00001d021572				-1	Not_Neo	Zm00001d042695	#N/A
281	SORBI-3006G276700	0.0795782	Zm00001d002889	0.0996544	Zm00001d026680	0.0377109	Hsp20/alpha crystallin family	10	0	6	0	-0.625	Not_Neo																							Zm00001d021573				-0.9375	Not_Neo	Zm00001d042918	#N/A
282	SORBI-3006G277550	0.00182469	Zm00001d002898	0.0301639	Zm00001d026683	0.00465051		15	0	1	7	-0.9375	Not_Neo																							Zm00001d021574				-0.0625	Not_Neo	Zm00001d042929	#N/A
283	SORBI-3006G279200	0.136799	Zm00001d002933	0.510944	Zm00001d026691	0.182348		1	4	11	0	0.015625	Not_Neo																							Zm00001d021576				0	Not_Neo	Zm00001d042930	#N/A
284	SORBI-3006G280000	0.107573	Zm00001d002936	0.165495	Zm00001d026696	0.402411		4	0	12	0	-0.25	Not_Neo																							Zm00001d021577				-1	M1	Zm00001d042958	#N/A
285	SORBI-3006G155000	0.115404	Zm00001d002954	#N/A	Zm00001d025905	#N/A		0	10	6	0	-0.625	Not_Neo																							Zm00001d021607				-1	Not_Neo	Zm00001d042968	#N/A
286	SORBI-3006G154800	0.541417	Zm00001d002956	0.359251	Zm00001d025903	0.256716		1	13	2	0	0.015625	Not_Neo																							Zm00001d021609				-0.9375	Not_Neo	Zm00001d042977	#N/A
287	SORBI-3006G154500	0.0532	Zm00001d002958	0.531848	Zm00001d025901	0.112889		0	16	0	0	-1	Not_Neo																							Zm00001d021610				-0.0625	Not_Neo	Zm00001d042985	#N/A
288	SORBI-3006G154400	0.166759	Zm00001d002959	0.347458	Zm00001d025900	0.134062	POT family	0	16	0	0	-1	Not_Neo																							Zm00001d021861				-0.666667	M1_M2	Zm00001d043090	#N/A
289	SORBI-3006G153900	0.264641	Zm00001d002962	0.29597	Zm00001d025894	0.220624		2	2	12	0	0.0625	Not_Neo																							Zm00001d021863				-0.5	Not_Neo	Zm00001d043095	#N/A
290	SORBI-3006G153400	#N/A	Zm00001d002967	#N/A	Zm00001d025892	#N/A		1	5	10	1	0.015625	Not_Neo																							Zm00001d021867				-1	Not_Neo	Zm00001d043249	#N/A
291	SORBI-3006G153200	0.0824093	Zm00001d002969	0.0281644	Zm00001d025891	0.0872725		16	0	0	0	-1	Not_Neo																							Zm00001d021932				0.109375	Not_Neo	Zm00001d043252	#N/A
292	SORBI-3006G152500	0.148299	Zm00001d002974	0.126488	Zm00001d025887	0.129266		0	1	1	16	-0.5	M2																							Zm00001d021952				0	Not_Neo	Zm00001d043269	#N/A
293	SORBI-3006G152600	0.16395	Zm00001d002974	0.126488	Zm00001d025887	0.129266		0	15	1	0	-0.9375	Not_Neo																							Zm00001d021954				-1	Not_Neo	Zm00001d043270	#N/A
294	SORBI-3006G151500	0.178948	Zm00001d002989	0.195729	Zm00001d025885	0.417844		4	1	2	14	0.0816327	Not_Neo																							Zm00001d022085				0	Not_Neo	Zm00001d043288	#N/A
295	SORBI-3006G151001	#N/A	Zm00001d002996	#N/A	Zm00001d025874	#N/A		13	0	3	3	-0.8125	Not_Neo																							Zm00001d022088				-0.25	Not_Neo	Zm00001d043301	#N/A
296	SORBI-3006G149700	0.108036	Zm00001d003009	0.395739	Zm00001d025872	0.474669		0	15	1	5	-0.9375	Not_Neo																							Zm00001d022168				-0.75	Not_Neo	Zm00001d043303	#N/A
297	SORBI-3006G149400	0.315818	Zm00001d003012	0.162284	Zm00001d025869	0.291322		12	0	1	13	-0.923077	M1																							Zm00001d022169				-0.1875	Not_Neo	Zm00001d043401	#N/A
298	SORBI-3006G149300	1.07484	Zm00001d003013	0.397735	Zm00001d025868	0.33257		2	5	6	14	0.16568	M2																							Zm00001d022172				0	Not_Neo	Zm00001d043407	#N/A
299	SORBI-3006G149200	0.0484976	Zm00001d003014	0.0297595	Zm00001d025866	0.0445098		0	16	0	0	-1	Not_Neo																							Zm00001d022174				-0.3125	Not_Neo	Zm00001d043420	#N/A
300	SORBI-3006G143100	0.0610073	Zm00001d003025	0.0857727	Zm00001d025831	0.0306358		0	14	2	6	-0.875	Not_Neo																							Zm00001d022396				0	Not_Neo	Zm00001d043462	#N/A
301	SORBI-3006G144800	0.166628	Zm00001d003041	0.288937	Zm00001d025842	0.257645		4	1	0	16	0.16	M1																							Zm00001d022400				0.015625	Not_Neo	Zm00001d043473	#N/A
302	SORBI-3006G146800	0.0492644	Zm00001d003049	0.163421	Zm00001d025853	0.479754		11	0	5	0	-0.6875	Not_Neo																							Zm00001d022630				-0.5	Not_Neo	Zm00001d043474	#N/A
303	SORBI-3006G147200	0.338304	Zm00001d003051	0.290024	Zm00001d025859	0.342542		15	0	0	6	-1	M1																							Zm00001d022631				0.015625	Not_Neo	Zm00001d043666	#N/A
304	SORBI-3006G147400	0.139044	Zm00001d003052	0.220515	Zm00001d025861	0.231022		0	1	3	15	-0.25	M1_M2																							Zm00001d022636				0.015625	Not_Neo	Zm00001d043686	#N/A
305	SORBI-3006G147600	0.170118	Zm00001d003058	0.363688	Zm00001d025862	0.294093		15	0	1	8	-0.9375	Not_Neo																							Zm00001d022637				0	Not_Neo	Zm00001d043700	#N/A
306	SORBI-3006G147700	0.235565	Zm00001d003059	0.166021	Zm00001d025862	0.294093		3	1	0	16	0.25	M1_M2																							Zm00001d022643				0	Not_Neo	Zm00001d043726	#N/A
307	SORBI-3006G148000	0.28775	Zm00001d003064	0.140164	Zm00001d025864	0.202271		0	4	12	0	-0.25	Not_Neo																							Zm00001d022647				-1	M1	Zm00001d043727	#N/A
308	SORBI-3006G141500	0.20355	Zm00001d003084	0.217987	Zm00001d025822	0.363786		16	0	0	0	-1	Not_Neo																							Zm00001d023560				-1	M2	Zm00001d043738	Zm00001d011656
309	SORBI-3006G140600	0.113521	Zm00001d003087	0.201843	Zm00001d025817	#N/A		0	0	16	0	0	Not_Neo																							Zm00001d023869				-0.9375	Not_Neo	Zm00001d043801	#N/A
310	SORBI-3006G140200	0.362815	Zm00001d003091	0.114103	Zm00001d025814	0.164817		9	0	3	10	-0.75	M1																							Zm00001d023873				0.015625	Not_Neo	Zm00001d043805	#N/A
311	SORBI-3006G139700	0.0638092	Zm00001d003103	0.21168	Zm00001d025812	0.278463		0	5	11	0	-0.3125	Not_Neo																							Zm00001d023904				0.015625	Not_Neo	Zm00001d043806	#N/A
312	SORBI-3006G139100	0.0693097	Zm00001d003106	0.0960053	Zm00001d025801	0.412		0	9	7	0	-0.5625	Not_Neo																							Zm00001d023906				-0.75	Not_Neo	Zm00001d043809	Zm00001d011617
313	SORBI-3006G138500	0.556409	Zm00001d003110	0.42509	Zm00001d025799	0.387819	Cyclin-dependent kinase inhibitor	0	16	0	6	-1	Not_Neo																							Zm00001d023907				-1	Not_Neo	Zm00001d043845	#N/A
314	SORBI-3006G138300	0.0995808	Zm00001d003114	0.535065	Zm00001d025798	0.350532		5	0	11	0	-0.3125	Not_Neo																							Zm00001d023910				-1	Not_Neo	Zm00001d044036	#N/A
315	SORBI-3006G137600	0.557141	Zm00001d003123	0.353177	Zm00001d025789	0.358487		9	0	7	0	-0.5625	Not_Neo																							Zm00001d023912				0	Not_Neo	Zm00001d044393	#N/A
316	SORBI-3006G137300	0.129687	Zm00001d003124	0.23073	Zm00001d025786	0.15547		0	8	8	0	-0.5	Not_Neo																							Zm00001d023914				-1	Not_Neo	Zm00001d044747	#N/A
317	SORBI-3006G137100	0.0187221	Zm00001d003127	0.0554321	Zm00001d025784	0.209743		13	0	3	0	-0.8125	Not_Neo																							Zm00001d023915				-1	Not_Neo	Zm00001d044766	#N/A
318	SORBI-3006G136400	0.138475	Zm00001d003147	0.215172	Zm00001d025777	0.322878		16	0	0	0	-1	Not_Neo																							Zm00001d024454				-1	M2	Zm00001d044864	#N/A
319	SORBI-3006G135600	0.266563	Zm00001d003157	0.12812	Zm00001d025773	0.196087		16	0	0	0	-1	Not_Neo																							Zm00001d024525				0.177778	Not_Neo	Zm00001d045124	#N/A
320	SORBI-3006G135300	0.805259	Zm00001d003160	0.297759	Zm00001d025771	0.134071		1	11	4	4	0.015625	Not_Neo																							Zm00001d024527				-0.9	Not_Neo	Zm00001d045427	#N/A
321	SORBI-3006G135100	0.0669022	Zm00001d003162	0.256249	Zm00001d025770	0.0867873	Protein tyrosine kinase	6	0	0	16	-1	M1																							Zm00001d024528				0.0625	Not_Neo	Zm00001d046896	#N/A
322	SORBI-3006G134400	0.634212	Zm00001d003167	0.143405	Zm00001d025763	0.108372		0	16	0	0	-1	Not_Neo																							Zm00001d024659				-1	Not_Neo	Zm00001d049092	#N/A
323	SORBI-3006G134200	9.96005e-05	Zm00001d003172	0.0209453	Zm00001d025762	0.119054		13	0	3	0	-0.8125	Not_Neo																							Zm00001d024660				-1	Not_Neo	Zm00001d049239	#N/A
324	SORBI-3006G134100	0.112687	Zm00001d003174	0.108157	Zm00001d025761	0.0777464		0	15	1	1	-0.9375	Not_Neo																							Zm00001d024661				-0.5	M2	Zm00001d049252	#N/A
325	SORBI-3006G134001	0.193678	Zm00001d003175	0.23521	Zm00001d025759	0.312794		3	12	0	0	0.48	Not_Neo																							Zm00001d027326				0	Not_Neo	Zm00001d052948	#N/A
326	SORBI-3006G133900	#N/A	Zm00001d003176	#N/A	Zm00001d025757	#N/A		0	4	12	0	-0.25	Not_Neo																							Zm00001d027329				0.015625	Not_Neo	Zm00001d053038	#N/A
327	SORBI-3006G133800	0.167418	Zm00001d003179	0.136636	Zm00001d025756	#N/A		15	0	1	1	-0.9375	Not_Neo																							Zm00001d027330				-0.1875	Not_Neo	#N/A	Zm00001d005019
328	SORBI-3006G133200	0.0900811	Zm00001d003183	0.318996	Zm00001d025754	0.148502		0	15	1	9	-0.9375	Not_Neo																							Zm00001d027423				-0.9375	Not_Neo	#N/A	Zm00001d005026
329	SORBI-3006G133300	0.203914	Zm00001d003183	0.318996	Zm00001d025754	0.148502		0	15	1	0	-0.9375	Not_Neo																							Zm00001d027739				-1	Not_Neo	#N/A	Zm00001d005027
330	SORBI-3006G133100	0.147832	Zm00001d003185	0.247415	Zm00001d025754	0.148502		11	0	5	0	-0.6875	Not_Neo																							Zm00001d027740				0.21875	Not_Neo	#N/A	Zm00001d005028
331	SORBI-3006G132900	0.165354	Zm00001d003186	0.125843	Zm00001d025754	0.148502		11	1	4	0	0.015625	Not_Neo																							Zm00001d027827				0	Not_Neo	#N/A	Zm00001d005100
332	SORBI-3006G133000	988.194	Zm00001d003186	0.125843	Zm00001d025754	0.148502		10	1	4	7	0.0177778	M1																							Zm00001d027832				-1	Not_Neo	#N/A	Zm00001d005238
333	SORBI-3006G132800	0.170297	Zm00001d003187	0.420663	Zm00001d025754	0.148502		8	2	6	0	0.15625	Not_Neo																							Zm00001d027833				-1	Not_Neo	#N/A	Zm00001d005338
334	SORBI-3006G132100	0.127664	Zm00001d003188	0.518802	Zm00001d025753	0.288378		1	3	3	16	0.0816327	M1_M2																							Zm00001d027835				-0.25	Not_Neo	#N/A	Zm00001d005350
335	SORBI-3006G132300	0.108595	Zm00001d003190	0.0901283	Zm00001d025753	0.288378	Domain of unknown function (DUF3527)	0	0	0	16	NA	M1																							Zm00001d027862				-0.1875	Not_Neo	#N/A	Zm00001d005368
336	SORBI-3006G132400	0.101416	Zm00001d003190	0.0901283	Zm00001d025753	0.288378	Domain of unknown function (DUF3527)	0	0	0	16	NA	M1																							Zm00001d027863				-0.875	Not_Neo	#N/A	Zm00001d005373
337	SORBI-3006G132500	0.0407505	Zm00001d003190	0.0901283	Zm00001d025753	0.288378	Domain of unknown function (DUF3527)	5	0	0	13	-1	M1																							Zm00001d027864				-1	M1	#N/A	Zm00001d005410
338	SORBI-3006G131900	0.204932	Zm00001d003193	0.163673	Zm00001d025752	0.0847301		0	14	0	9	-1	M2																							Zm00001d027866				-1	M1	#N/A	Zm00001d005410
339	SORBI-3006G131400	0.0897721	Zm00001d003200	0.170808	Zm00001d025751	0.160467		13	0	3	0	-0.8125	Not_Neo																							Zm00001d027868				-1	Not_Neo	#N/A	Zm00001d005410
340	SORBI-3006G131000	0.0998798	Zm00001d003207	0.130213	Zm00001d025750	0.0716952	TCP-1/cpn60 chaperonin family	0	0	16	0	0	Not_Neo																							Zm00001d027962				-1	M2	#N/A	Zm00001d005970
341	SORBI-3006G129000	0.0642962	Zm00001d003220	0.149195	Zm00001d025740	0.403305	Transferase family	16	0	0	0	-1	Not_Neo																							Zm00001d028118				-1	Not_Neo	#N/A	Zm00001d005978
342	SORBI-3006G128900	0.321887	Zm00001d003222	0.181984	Zm00001d025739	0.215949		0	4	12	0	-0.25	Not_Neo																							Zm00001d028120				-1	Not_Neo	#N/A	Zm00001d006008
343	SORBI-3006G128200	0.0994573	Zm00001d003228	0.0911858	Zm00001d025735	0.0885039		7	0	9	1	-0.4375	Not_Neo																							Zm00001d028122				-1	Not_Neo	#N/A	Zm00001d006008
344	SORBI-3006G127400	0.0842806	Zm00001d003245	0.1274	Zm00001d025726	0.0726324		0	16	0	0	-1	Not_Neo																							Zm00001d028162				0	M1	#N/A	Zm00001d006209
345	SORBI-3006G127000	0.153883	Zm00001d003248	0.411847	Zm00001d025724	0.359877		8	0	8	0	-0.5	Not_Neo																							Zm00001d028164				-1	Not_Neo	#N/A	Zm00001d006231
346	SORBI-3006G126700	0.0819597	Zm00001d003249	0.290223	Zm00001d025721	0.010318		0	9	7	0	-0.5625	Not_Neo																							Zm00001d028165				-0.4375	Not_Neo	#N/A	Zm00001d006307
347	SORBI-3006G126500	0.139691	Zm00001d003250	0.658583	Zm00001d025717	0.0194856		0	16	0	0	-1	Not_Neo																							Zm00001d028167				0	Not_Neo	#N/A	Zm00001d006320
348	SORBI-3006G126400	0.342066	Zm00001d003251	0.191134	Zm00001d025716	0.244573		0	0	16	0	0	Not_Neo																							Zm00001d028216				0.015625	Not_Neo	#N/A	Zm00001d006324
349	SORBI-3006G126200	0.349967	Zm00001d003254	0.498131	Zm00001d025715	0.498599		0	0	16	0	0	Not_Neo																							Zm00001d028220				-0.9375	Not_Neo	#N/A	Zm00001d006467
350	SORBI-3006G126100	0.0448128	Zm00001d003256	0.16392	Zm00001d025714	0.134411		0	2	14	0	-0.125	Not_Neo																							Zm00001d028221				-0.6875	Not_Neo	#N/A	Zm00001d006605
351	SORBI-3006G125900	0.0596031	Zm00001d003258	0.0634673	Zm00001d025713	0.0464149		3	0	13	0	-0.1875	Not_Neo																							Zm00001d028222				0	Not_Neo	#N/A	Zm00001d006704
352	SORBI-3006G125500	0.750664	Zm00001d003261	0.927931	Zm00001d025712	0.669553		0	0	16	0	0	Not_Neo																							Zm00001d028225				0.22449	Not_Neo	#N/A	Zm00001d006744
353	SORBI-3006G124400	0.0819125	Zm00001d003266	0.10786	Zm00001d025710	0.139908		0	4	12	0	-0.25	Not_Neo																							Zm00001d028226				0.444444	M2	#N/A	Zm00001d006841
354	SORBI-3006G124200	994.312	Zm00001d003269	0.179347	Zm00001d025709	0.11405		0	13	3	0	-0.8125	Not_Neo																							Zm00001d028227				-1	M1_M2	#N/A	Zm00001d007071
355	SORBI-3006G123000	0.187818	Zm00001d003272	0.184702	Zm00001d025699	0.23247		14	0	2	6	-0.875	Not_Neo																							Zm00001d028412				0	Not_Neo	#N/A	Zm00001d007075
356	SORBI-3006G121400	0.14986	Zm00001d003284	0.294762	Zm00001d025694	#N/A		0	10	6	0	-0.625	Not_Neo																							Zm00001d028413				-0.5625	Not_Neo	#N/A	Zm00001d007113
357	SORBI-3006G121100	0.103204	Zm00001d003288	0.131531	Zm00001d025692	0.224906		4	0	12	0	-0.25	Not_Neo																							Zm00001d028711				0	Not_Neo	#N/A	Zm00001d007202
358	SORBI-3006G120800	1.29258	Zm00001d003291	0.817751	Zm00001d025689	0.208717		2	0	14	0	-0.125	Not_Neo																							Zm00001d028712				NA	M1_M2	#N/A	Zm00001d007285
359	SORBI-3006G120400	0.586188	Zm00001d003293	0.318543	Zm00001d025684	0.272829		1	0	0	16	-1	M1																							Zm00001d028813				-0.3125	Not_Neo	#N/A	Zm00001d007420
360	SORBI-3006G116300	0.196209	Zm00001d003328	0.25877	Zm00001d025675	0.204335		3	5	8	0	0.203125	Not_Neo																							Zm00001d028842				-0.25	Not_Neo	#N/A	Zm00001d007638
361	SORBI-3006G116100	0.382909	Zm00001d003329	0.651636	Zm00001d025673	0.418899		3	0	13	0	-0.1875	Not_Neo																							Zm00001d028873				-1	Not_Neo	#N/A	Zm00001d008173
362	SORBI-3006G115700	0.39216	Zm00001d003331	0.565238	Zm00001d025669	0.348436		1	15	0	16	0.015625	Not_Neo																							Zm00001d028890				-1	Not_Neo	#N/A	Zm00001d008173
363	SORBI-3006G115600	0.360989	Zm00001d003333	0.319591	Zm00001d025668	0.538324		10	1	5	0	0.015625	Not_Neo																							Zm00001d028896				-0.375	Not_Neo	#N/A	Zm00001d008176
364	SORBI-3006G115466	0.304428	Zm00001d003334	0.36393	Zm00001d025667	0.840149		3	1	3	16	0.0816327	M1_M2																							Zm00001d028898				-0.1875	Not_Neo	#N/A	Zm00001d008293
365	SORBI-3006G114800	0.0228903	Zm00001d003347	0.046255	Zm00001d025660	0.0210673		0	1	15	0	-0.0625	Not_Neo																							Zm00001d028899				-0.1875	Not_Neo	#N/A	Zm00001d008293
366	SORBI-3006G114500	#N/A	Zm00001d003352	#N/A	Zm00001d025658	#N/A		0	1	15	0	-0.0625	Not_Neo																							Zm00001d029066				-0.6875	Not_Neo	#N/A	Zm00001d008306
367	SORBI-3006G114200	0.23202	Zm00001d003353	0.212872	Zm00001d025654	0.33052		3	4	0	16	0.897959	M1_M2																							Zm00001d029067				-0.6875	Not_Neo	#N/A	Zm00001d008306
368	SORBI-3006G113800	0.280818	Zm00001d003358	0.437383	Zm00001d025654	0.33052		11	2	2	8	0.231111	M1																							Zm00001d029071				-1	Not_Neo	#N/A	Zm00001d008308
369	SORBI-3006G113200	0.0677542	Zm00001d003363	0.8126	Zm00001d025654	0.33052		10	0	2	12	-0.833333	M1																							Zm00001d029072				-1	Not_Neo	#N/A	Zm00001d008369
370	SORBI-3006G112000	0.70957	Zm00001d003370	0.350104	Zm00001d025645	0.591105	Nodulin-like	8	4	4	0	0.4375	Not_Neo																							Zm00001d029104				0	Not_Neo	#N/A	Zm00001d008594
371	SORBI-3006G110300	0.268369	Zm00001d003382	0.325921	Zm00001d025639	0.432279		0	13	3	0	-0.8125	Not_Neo																							Zm00001d029105				0	Not_Neo	#N/A	Zm00001d008762
372	SORBI-3006G109700	0.734826	Zm00001d003393	#N/A	Zm00001d025628	#N/A		0	1	15	0	-0.0625	Not_Neo																							Zm00001d029106				-0.3125	Not_Neo	#N/A	Zm00001d008800
373	SORBI-3006G108832	0.313134	Zm00001d003398	0.443835	Zm00001d025622	1.03498		0	0	0	16	NA	M1_M2																							Zm00001d029107				-0.9375	Not_Neo	#N/A	Zm00001d008825
374	SORBI-3006G108700	0.140306	Zm00001d003399	0.0917279	Zm00001d025621	0.204952		16	0	0	2	-1	Not_Neo																							Zm00001d029111				-1	Not_Neo	#N/A	Zm00001d008839
375	SORBI-3006G108400	9.72684e-05	Zm00001d003401	0.0100209	Zm00001d025617	0.251392		11	0	5	0	-0.6875	Not_Neo																							Zm00001d029119				-0.6875	Not_Neo	#N/A	Zm00001d008890
376	SORBI-3006G107600	9.61908e-05	Zm00001d003411	9.99862e-05	Zm00001d025616	0.21484		0	14	2	9	-0.875	Not_Neo																							Zm00001d029122				0	Not_Neo	#N/A	Zm00001d008893
377	SORBI-3006G105500	0.115466	Zm00001d003431	0.0353326	Zm00001d025588	0.0364919		0	0	2	16	0	M1																							Zm00001d029123				-0.875	Not_Neo	#N/A	Zm00001d008907
378	SORBI-3006G105000	0.119755	Zm00001d003432	0.165442	Zm00001d025586	0.154233		16	0	0	2	-1	Not_Neo																							Zm00001d029124				-0.5	Not_Neo	#N/A	Zm00001d008916
379	SORBI-3006G105100	0.176214	Zm00001d003432	0.165442	Zm00001d025586	0.154233		0	0	0	16	NA	M1																							Zm00001d029125				-1	Not_Neo	#N/A	Zm00001d008919
380	SORBI-3006G105200	0.238181	Zm00001d003432	0.165442	Zm00001d025586	0.154233		16	0	0	1	-1	Not_Neo																							Zm00001d029127				-0.6	M1	#N/A	Zm00001d008922
381	SORBI-3006G104900	0.11044	Zm00001d003434	0.167709	Zm00001d025586	0.154233		16	0	0	0	-1	Not_Neo																							Zm00001d029197				-1	Not_Neo	#N/A	Zm00001d008924
382	SORBI-3006G104700	0.161203	Zm00001d003436	0.151183	Zm00001d025586	0.154233		4	0	0	16	-1	M1																							Zm00001d029198				0.0816327	M1	#N/A	Zm00001d008925
383	SORBI-3006G104600	0.115057	Zm00001d003438	0.241288	Zm00001d025581	0.301743		12	0	4	0	-0.75	Not_Neo																							Zm00001d029201				0.015625	Not_Neo	#N/A	Zm00001d008925
384	SORBI-3006G103000	0.302525	Zm00001d003463	0.186054	Zm00001d025576	#N/A		10	0	0	12	-1	M1																							Zm00001d029202				-1	Not_Neo	#N/A	Zm00001d009146
385	SORBI-3006G102900	0.104617	Zm00001d003464	0.0652632	Zm00001d025571	0.312097		0	0	16	0	0	Not_Neo																							Zm00001d029203				-1	M1	#N/A	Zm00001d009503
386	SORBI-3006G102500	0.0242258	Zm00001d003468	0.0536479	Zm00001d025572	0.084955		16	0	0	0	-1	Not_Neo																							Zm00001d029212				-1	Not_Neo	#N/A	Zm00001d009503
387	SORBI-3006G102000	#N/A	Zm00001d003470	#N/A	Zm00001d025574	#N/A	Myb-like DNA-binding domain	6	2	8	3	0.125	Not_Neo																							Zm00001d030116				0	Not_Neo	#N/A	Zm00001d009504
388	SORBI-3006G101900	0.0740615	Zm00001d003471	0.0854569	Zm00001d025572	0.084955		0	2	8	14	-0.2	M1_M2																							Zm00001d030121				-0.6875	Not_Neo	#N/A	Zm00001d009510
389	SORBI-3006G101700	0.0228688	Zm00001d003476	0.0214967	Zm00001d025570	0.428464	Lecithin:cholesterol acyltransferase	0	0	16	0	0	Not_Neo																							Zm00001d030123				-1	Not_Neo	#N/A	Zm00001d009570
390	SORBI-3006G100700	0.168246	Zm00001d003492	0.190723	Zm00001d025568	0.201927		0	13	3	0	-0.8125	Not_Neo																							Zm00001d030775				0.0177778	Not_Neo	#N/A	Zm00001d009658
391	SORBI-3006G100332	0.302478	Zm00001d003494	0.46851	Zm00001d025566	0.190646		9	2	1	11	0.305556	M1																							Zm00001d030782				0.0177778	M2	#N/A	Zm00001d010284
392	SORBI-3006G100400	0.789031	Zm00001d003494	0.46851	Zm00001d025566	0.190646		0	1	1	15	-0.5	M1_M2																							Zm00001d031065				0.015625	Not_Neo	#N/A	Zm00001d010416
393	SORBI-3006G098600	0.643126	Zm00001d003505	0.252565	Zm00001d025558	0.315574		9	0	3	8	-0.75	M1																							Zm00001d031068				-0.0625	Not_Neo	#N/A	Zm00001d011366
394	SORBI-3006G098100	0.174886	Zm00001d003509	0.21826	Zm00001d025548	0.256045		10	0	6	0	-0.625	Not_Neo																							Zm00001d031071				-1	Not_Neo	#N/A	Zm00001d011427
395	SORBI-3006G097900	0.200311	Zm00001d003510	0.180052	Zm00001d025547	0.143063	Lysine methyltransferase	2	0	10	15	-0.166667	M1_M2																							Zm00001d031072				-1	M1	#N/A	Zm00001d011446
396	SORBI-3006G097500	0.209759	Zm00001d003512	0.267252	Zm00001d025545	0.27303		1	3	11	4	0.0177778	M1																							Zm00001d031094				-0.375	Not_Neo	#N/A	Zm00001d011486
397	SORBI-3006G096900	0.184752	Zm00001d003518	0.333577	Zm00001d025538	0.355798		12	0	4	0	-0.75	Not_Neo																							Zm00001d031109				-0.9375	Not_Neo	#N/A	Zm00001d011487
398	SORBI-3006G096100	0.156827	Zm00001d003524	0.180345	Zm00001d025533	0.153154		16	0	0	0	-1	Not_Neo																							Zm00001d031289				-1	Not_Neo	#N/A	Zm00001d011490
399	SORBI-3006G096400	0.165997	Zm00001d003524	0.180345	Zm00001d025533	0.153154		9	0	0	10	-1	M1																							Zm00001d031290				-0.9375	Not_Neo	#N/A	Zm00001d011614
400	SORBI-3006G095800	0.322921	Zm00001d003525	0.411773	Zm00001d025528	0.310263		0	7	8	4	-0.466667	M2																							Zm00001d031291				-0.625	Not_Neo	#N/A	Zm00001d011615
401	SORBI-3006G096200	0.290646	Zm00001d003525	0.411773	Zm00001d025528	0.310263		0	1	8	16	-0.111111	M2																							Zm00001d031292				0	Not_Neo	#N/A	Zm00001d011656
402	SORBI-3006G096300	0.274152	Zm00001d003525	0.411773	Zm00001d025528	0.310263		0	7	8	11	-0.466667	M2																							Zm00001d031300				0.0204082	M1_M2	#N/A	Zm00001d011657
403	SORBI-3006G095600	0.0773142	Zm00001d003533	0.0345864	Zm00001d025524	0.0982181		16	0	0	0	-1	Not_Neo																							Zm00001d031416				-0.3125	Not_Neo	#N/A	Zm00001d011775
404	SORBI-3006G095000	1.01873	Zm00001d003543	0.385584	Zm00001d025520	0.443515		3	7	0	15	0.68	M2																							Zm00001d031418				-1	Not_Neo	#N/A	Zm00001d011845
405	SORBI-3006G094900	0.118576	Zm00001d003544	0.222841	Zm00001d025519	0.406444		0	2	2	16	-0.5	M2																							Zm00001d031420				-1	Not_Neo	#N/A	Zm00001d011845
406	SORBI-3006G094600	9.41987e-05	Zm00001d003546	0.112412	Zm00001d025517	0.32746		0	6	10	0	-0.375	Not_Neo																							Zm00001d031428				-1	M1	#N/A	Zm00001d011845
407	SORBI-3006G094500	0.219115	Zm00001d003549	0.238969	Zm00001d025514	0.257959		0	12	4	0	-0.75	Not_Neo																							Zm00001d031450				-0.25	Not_Neo	#N/A	Zm00001d011851
408	SORBI-3006G093900	1001.14	Zm00001d003552	0.0428055	Zm00001d025509	0.0727388		0	16	0	0	-1	Not_Neo																							Zm00001d031451				0.25	M1	#N/A	Zm00001d011853
409	SORBI-3006G093500	0.0542019	Zm00001d003554	0.0970375	Zm00001d025508	0.053526		1	1	0	16	1	M1_M2																							Zm00001d031539				-0.1875	Not_Neo	#N/A	Zm00001d011889
410	SORBI-3006G092100	0.0234882	Zm00001d003583	0.0744557	Zm00001d025483	0.118004		2	3	6	8	0.165289	M2																							Zm00001d031569				-0.75	M1	#N/A	Zm00001d011890
411	SORBI-3006G090300	0.226525	Zm00001d003598	0.180837	Zm00001d025472	#N/A		8	1	7	8	0.015625	Not_Neo																							Zm00001d031570				-0.866667	Not_Neo	#N/A	Zm00001d012171
412	SORBI-3006G090400	0.269832	Zm00001d003598	0.180837	Zm00001d025472	#N/A		5	1	7	14	0.0236686	M1																							Zm00001d031571				-1	Not_Neo	#N/A	Zm00001d012173
413	SORBI-3006G088200	0.306623	Zm00001d003611	0.383639	Zm00001d025461	0.406289		3	0	13	0	-0.1875	Not_Neo																							Zm00001d031577				-0.5	Not_Neo	#N/A	Zm00001d012337
414	SORBI-3006G088000	0.290731	Zm00001d003612	0.613422	Zm00001d025453	0.372507		0	16	0	0	-1	Not_Neo																							Zm00001d031580				-0.0625	Not_Neo	#N/A	Zm00001d013086
415	SORBI-3006G087100	0.258996	Zm00001d003616	0.185874	Zm00001d025450	0.547881	C-terminus of histone H2A	1	0	15	0	-0.0625	Not_Neo																							Zm00001d031634				0	Not_Neo	#N/A	Zm00001d013204
416	SORBI-3006G085601	0.0349765	Zm00001d003630	0.0550046	Zm00001d025445	0.173019	Exostosin family	7	0	9	0	-0.4375	Not_Neo																							Zm00001d031635				-0.230769	M1	#N/A	Zm00001d013361
417	SORBI-3006G084000	0.67479	Zm00001d003646	0.810782	Zm00001d025433	0.202336		0	16	0	0	-1	Not_Neo																							Zm00001d031705				-1	Not_Neo	#N/A	Zm00001d013732
418	SORBI-3006G083800	0.466549	Zm00001d003649	0.48555	Zm00001d025431	0.172536		0	11	5	0	-0.6875	Not_Neo																							Zm00001d031724				-0.5	Not_Neo	#N/A	Zm00001d013860
419	SORBI-3006G082500	0.362414	Zm00001d003663	0.261998	Zm00001d025420	0.582836	POT family	16	0	0	0	-1	Not_Neo																							Zm00001d031725				0	Not_Neo	#N/A	Zm00001d013914
420	SORBI-3006G082400	0.567536	Zm00001d003664	0.616252	Zm00001d025419	0.414791		7	0	9	0	-0.4375	Not_Neo																							Zm00001d031738				0	Not_Neo	#N/A	Zm00001d013914
421	SORBI-3006G081600	0.0793442	Zm00001d003669	0.190014	Zm00001d025414	0.143101		0	16	0	0	-1	Not_Neo																							Zm00001d031740				-0.8125	Not_Neo	#N/A	Zm00001d013947
422	SORBI-3006G081100	9.29901e-05	Zm00001d003672	0.0596298	Zm00001d025413	0.341856		0	1	15	0	-0.0625	Not_Neo																							Zm00001d031741				-1	M1	#N/A	Zm00001d014341
423	SORBI-3006G080900	0.117474	Zm00001d003674	0.552306	Zm00001d025412	0.241209		0	16	0	0	-1	Not_Neo																							Zm00001d032045				-1	Not_Neo	#N/A	Zm00001d014344
424	SORBI-3006G079900	0.196249	Zm00001d003685	0.227147	Zm00001d025407	0.163895		12	1	3	0	0.015625	Not_Neo																							Zm00001d032160				0.25	M1_M2	#N/A	Zm00001d025055
425	SORBI-3006G079300	#N/A	Zm00001d003707	#N/A	Zm00001d025402	#N/A		11	1	3	0	0.0177778	Not_Neo																							Zm00001d032298				0.0277778	M2	#N/A	Zm00001d025126
426	SORBI-3006G078400	1019.5	Zm00001d003712	0.0092702	Zm00001d025401	0.00572355		0	14	0	8	-1	M2																							Zm00001d032306				-1	Not_Neo	#N/A	Zm00001d025130
427	SORBI-3006G078500	0.231001	Zm00001d003712	0.0092702	Zm00001d025401	0.00572355		0	15	0	7	-1	M2																							Zm00001d032307				-0.5625	Not_Neo	#N/A	Zm00001d025236
428	SORBI-3006G077300	171.667	Zm00001d003713	0.156943	Zm00001d025398	0.0954255		0	16	0	0	-1	Not_Neo																							Zm00001d032308				-1	Not_Neo	#N/A	Zm00001d025237
429	SORBI-3006G076400	0.000105137	Zm00001d003725	0.000101197	Zm00001d025406	#N/A		0	0	16	0	0	Not_Neo																							Zm00001d032310				0.078125	Not_Neo	#N/A	Zm00001d025237
430	SORBI-3006G075600	0.264397	Zm00001d003742	0.366193	Zm00001d025375	0.358286		2	8	6	0	0.15625	Not_Neo																							Zm00001d032311				-0.666667	M1	#N/A	Zm00001d025337
431	SORBI-3006G075500	0.204299	Zm00001d003743	0.189854	Zm00001d025374	0.302644		7	0	1	16	-0.875	M1																							Zm00001d032664				-0.4375	Not_Neo	#N/A	Zm00001d025342
432	SORBI-3006G075200	0.157058	Zm00001d003749	0.142667	Zm00001d025373	0.555544		4	0	1	16	-0.8	M1																							Zm00001d032672				-0.375	Not_Neo	#N/A	Zm00001d025371
433	SORBI-3006G075000	0.0364283	Zm00001d003751	0.0507754	Zm00001d025371	0.0437989		0	6	10	1	-0.375	Not_Neo																							Zm00001d032696				0.015625	Not_Neo	#N/A	Zm00001d025668
434	SORBI-3006G074900	0.126093	Zm00001d003754	0.268841	Zm00001d025369	0.15989		0	15	0	13	-1	Not_Neo																							Zm00001d032699				0.015625	Not_Neo	#N/A	Zm00001d025669
435	SORBI-3006G074100	0.197521	Zm00001d003761	0.174477	Zm00001d025367	0.0159365		12	0	3	14	-0.8	Not_Neo																							Zm00001d032703				-0.1875	Not_Neo	#N/A	Zm00001d025673
436	SORBI-3006G073200	0.147496	Zm00001d003773	0.2494	Zm00001d025359	0.237408		0	14	2	0	-0.875	Not_Neo																							Zm00001d032704				0	Not_Neo	#N/A	Zm00001d025712
437	SORBI-3006G069000	0.357702	Zm00001d003797	0.118629	Zm00001d025352	0.296113		0	14	1	7	-0.933333	M2																							Zm00001d032708				0	Not_Neo	#N/A	Zm00001d025716
438	SORBI-3006G068200	0.0232675	Zm00001d003806	0.214276	Zm00001d025345	0.296109		2	7	0	13	0.444444	M2																							Zm00001d032710				-0.875	Not_Neo	#N/A	Zm00001d025982
439	SORBI-3006G067700	0.125698	Zm00001d003812	0.164915	Zm00001d025342	0.213468		0	7	9	0	-0.4375	Not_Neo																							Zm00001d032716				-0.5	M2	#N/A	Zm00001d025985
440	SORBI-3006G066600	0.154941	Zm00001d003822	0.0457106	Zm00001d025339	#N/A		0	16	0	0	-1	Not_Neo																							Zm00001d032718				-0.8125	Not_Neo	#N/A	Zm00001d026096
441	SORBI-3006G066300	0.0877403	Zm00001d003829	0.1209	Zm00001d025337	0.151386		2	0	1	16	-0.666667	M1																							Zm00001d032719				-1	Not_Neo	#N/A	Zm00001d035913
442	SORBI-3006G066200	0.0458102	Zm00001d003830	0.12857	Zm00001d025333	0.0893676	Citrate transporter	4	0	12	2	-0.25	Not_Neo																							Zm00001d032784				0.015625	Not_Neo	#N/A	Zm00001d036035
443	SORBI-3006G064800	0.403678	Zm00001d003848	0.154413	Zm00001d025326	0.224636		16	0	0	0	-1	Not_Neo																							Zm00001d032822				-0.5	Not_Neo	#N/A	Zm00001d036293
444	SORBI-3006G063500	0.132199	Zm00001d003850	0.203482	Zm00001d025319	0.128219	Signal peptidase, peptidase S26	5	0	11	0	-0.3125	Not_Neo																							Zm00001d032823				-1	Not_Neo	#N/A	Zm00001d036351
445	SORBI-3006G062900	0.232297	Zm00001d003852	0.181044	Zm00001d025310	0.128219	Clp protease	8	0	3	16	-0.727273	M1																							Zm00001d032825				-0.125	Not_Neo	#N/A	Zm00001d036428
446	SORBI-3006G063100	0.403572	Zm00001d003852	0.181044	Zm00001d025310	0.128219	Clp protease	6	0	3	16	-0.666667	M1																							Zm00001d032903				-0.9375	Not_Neo	#N/A	Zm00001d036485
447	SORBI-3006G063200	0.298084	Zm00001d003852	0.181044	Zm00001d025310	0.128219	Clp protease	13	0	3	0	-0.8125	Not_Neo																							Zm00001d032904				-0.714286	M2	#N/A	Zm00001d036558
448	SORBI-3006G062500	0.03622	Zm00001d003857	0.0752185	Zm00001d025305	0.085207		0	0	16	0	0	Not_Neo																							Zm00001d033130				-0.0625	Not_Neo	#N/A	Zm00001d036560
449	SORBI-3006G061300	0.115131	Zm00001d003861	0.03962	Zm00001d025303	0.138368		16	0	0	0	-1	Not_Neo																							Zm00001d033136				-1	M1	#N/A	Zm00001d036588
450	SORBI-3006G061100	0.328531	Zm00001d003864	0.471165	Zm00001d025300	0.457825		0	5	11	0	-0.3125	Not_Neo																							Zm00001d033138				-1	Not_Neo	#N/A	Zm00001d036593
451	SORBI-3006G059800	0.200018	Zm00001d003871	0.119539	Zm00001d025298	0.0731571		0	0	2	16	0	M1_M2																							Zm00001d033344				-0.9375	Not_Neo	#N/A	Zm00001d036597
452	SORBI-3006G059500	#N/A	Zm00001d003872	#N/A	Zm00001d025294	#N/A		0	5	11	1	-0.3125	Not_Neo																							Zm00001d033404				-0.75	Not_Neo	#N/A	Zm00001d036598
453	SORBI-3006G059100	0.108955	Zm00001d003877	0.192077	Zm00001d025287	0.0747895		8	0	0	16	-1	M1																							Zm00001d033405				-0.5	Not_Neo	#N/A	Zm00001d036742
454	SORBI-3006G058732	0.238657	Zm00001d003884	0.282846	Zm00001d025281	0.284181		0	12	0	14	-1	M2																							Zm00001d033545				-1	Not_Neo	#N/A	Zm00001d036777
455	SORBI-3006G058400	0.218521	Zm00001d003889	0.254095	Zm00001d025275	0.321918		16	0	0	1	-1	Not_Neo																							Zm00001d033549				-0.4375	Not_Neo	#N/A	Zm00001d036801
456	SORBI-3006G058300	0.237224	Zm00001d003890	0.68951	Zm00001d025274	0.286221	Protein kinase domain	0	2	14	0	-0.125	Not_Neo																							Zm00001d033551				-1	Not_Neo	#N/A	Zm00001d036902
457	SORBI-3006G058100	0.0247743	Zm00001d003894	0.538897	Zm00001d025273	0.0259525		0	10	6	0	-0.625	Not_Neo																							Zm00001d033602				-0.9375	Not_Neo	#N/A	Zm00001d036903
458	SORBI-3006G056200	#N/A	Zm00001d003904	#N/A	Zm00001d025271	#N/A		11	0	5	0	-0.6875	Not_Neo																							Zm00001d033605				0	Not_Neo	#N/A	Zm00001d036904
459	SORBI-3006G056000	0.0860748	Zm00001d003911	0.103337	Zm00001d025268	0.27691		16	0	0	0	-1	Not_Neo																							Zm00001d033645				0	Not_Neo	#N/A	Zm00001d036904
460	SORBI-3006G055800	#N/A	Zm00001d003913	#N/A	Zm00001d025267	#N/A		0	15	1	1	-0.9375	Not_Neo																							Zm00001d033648				0	Not_Neo	#N/A	Zm00001d036904
461	SORBI-3006G054500	0.119135	Zm00001d003928	0.143416	Zm00001d025252	#N/A		0	0	16	0	0	Not_Neo																							Zm00001d033738				0	Not_Neo	#N/A	Zm00001d036904
462	SORBI-3006G054400	0.421729	Zm00001d003929	0.391551	Zm00001d025251	0.535789		3	1	0	16	0.25	M1																							Zm00001d033860				0	Not_Neo	#N/A	Zm00001d036905
463	SORBI-3006G053800	0.13919	Zm00001d003930	0.500872	Zm00001d025247	0.81256	HR-like lesion-inducing	3	6	5	13	0.306122	M2																							Zm00001d033861				-0.9375	Not_Neo	#N/A	Zm00001d037004
464	SORBI-3006G053000	0.0368759	Zm00001d003945	0.11822	Zm00001d025241	0.106203		0	0	16	0	0	Not_Neo																							Zm00001d033985				0.297521	Not_Neo	#N/A	Zm00001d037073
465	SORBI-3006G052500	0.085659	Zm00001d003947	0.0313635	Zm00001d025240	0.0747999	DYW family of nucleic acid deaminases	0	16	0	0	-1	Not_Neo																							Zm00001d033986				0.297521	Not_Neo	#N/A	Zm00001d037073
466	SORBI-3006G052800	0.0873805	Zm00001d003947	0.0313635	Zm00001d025240	0.0747999	DYW family of nucleic acid deaminases	0	16	0	0	-1	Not_Neo																							Zm00001d033987				-1	Not_Neo	#N/A	Zm00001d037105
467	SORBI-3006G052300	0.15495	Zm00001d003948	0.123553	Zm00001d025238	0.255092		12	1	3	0	0.015625	Not_Neo																							Zm00001d033988				-1	Not_Neo	#N/A	Zm00001d037108
468	SORBI-3006G052200	0.311095	Zm00001d003949	0.310384	Zm00001d025237	0.284518		0	16	0	0	-1	Not_Neo																							Zm00001d033989				-0.75	M1	#N/A	Zm00001d037155
469	SORBI-3006G052100	0.421626	Zm00001d003950	0.184394	Zm00001d025237	0.284518		2	3	11	13	0.078125	Not_Neo																							Zm00001d034062				0.132231	M1_M2	#N/A	Zm00001d037158
470	SORBI-3006G051900	0.678536	Zm00001d003957	0.106435	Zm00001d025236	0.140865		9	0	7	0	-0.5625	Not_Neo																							Zm00001d034188				-0.933333	M1	#N/A	Zm00001d037165
471	SORBI-3006G051800	0.363336	Zm00001d003958	0.237836	Zm00001d025235	0.445249		16	0	0	4	-1	Not_Neo																							Zm00001d034201				0.015625	Not_Neo	#N/A	Zm00001d037233
472	SORBI-3006G050400	0.147983	Zm00001d003975	0.140232	Zm00001d025228	0.326812		6	0	10	3	-0.375	Not_Neo																							Zm00001d034376				-0.125	Not_Neo	#N/A	Zm00001d041497
473	SORBI-3006G045000	0.263466	Zm00001d003981	#N/A	Zm00001d025225	#N/A		5	1	8	16	0.0204082	M1_M2																							Zm00001d034379				-0.75	Not_Neo	#N/A	Zm00001d041592
474	SORBI-3006G045500	0.200913	Zm00001d003993	0.228678	Zm00001d025218	#N/A		9	1	6	9	0.015625	Not_Neo																							Zm00001d034380				-0.8125	Not_Neo	#N/A	Zm00001d041594
475	SORBI-3006G046600	0.371925	Zm00001d003996	0.354621	Zm00001d025208	0.172835		0	5	11	0	-0.3125	Not_Neo																							Zm00001d034425				0.015625	Not_Neo	#N/A	Zm00001d041595
476	SORBI-3006G047200	0.156034	Zm00001d004007	0.223185	Zm00001d025205	0.16354		0	1	14	16	-0.0666667	M2																							Zm00001d034608				-1	Not_Neo	#N/A	Zm00001d044713
477	SORBI-3006G048700	0.000105266	Zm00001d004019	0.074589	Zm00001d025170	0.0521632	Cytidylyltransferase-like	0	16	0	0	-1	Not_Neo																							Zm00001d034986				-0.9375	Not_Neo	#N/A	Zm00001d047260
478	SORBI-3006G049300	0.45006	Zm00001d004022	0.634214	Zm00001d025171	0.446516		12	2	2	0	0.21875	Not_Neo																							Zm00001d034990				0	Not_Neo	#N/A	Zm00001d047354
479	SORBI-3006G049700	0.103474	Zm00001d004023	0.297278	Zm00001d025178	0.320465		0	0	16	0	0	Not_Neo																							Zm00001d035048				-1	Not_Neo	#N/A	Zm00001d047397
480	SORBI-3006G050100	0.346319	Zm00001d004036	#N/A	Zm00001d025182	0.484746		0	10	6	2	-0.625	Not_Neo																							Zm00001d035052				0.361111	M1_M2	#N/A	Zm00001d047399
481	SORBI-3006G043700	#N/A	Zm00001d004042	#N/A	Zm00001d025201	#N/A		0	16	0	0	-1	Not_Neo																							Zm00001d035198				-0.0625	Not_Neo	#N/A	Zm00001d047464
482	SORBI-3006G041100	0.7676	Zm00001d004070	#N/A	Zm00001d025165	#N/A		0	2	14	15	-0.125	Not_Neo																							Zm00001d035456				0.09375	Not_Neo	#N/A	Zm00001d047466
483	SORBI-3006G039400	#N/A	Zm00001d004091	#N/A	Zm00001d025130	#N/A	PCI domain	16	0	0	0	-1	Not_Neo																							Zm00001d037499				-0.0625	Not_Neo	#N/A	Zm00001d047555
484	SORBI-3006G030100	0.183682	Zm00001d004125	#N/A	Zm00001d024998	#N/A		0	0	16	0	0	Not_Neo																							Zm00001d037503				0.333333	Not_Neo	#N/A	Zm00001d047560
485	SORBI-3006G032900	#N/A	Zm00001d004152	#N/A	Zm00001d025085	#N/A		16	0	0	0	-1	Not_Neo																							Zm00001d037565				0	Not_Neo	#N/A	Zm00001d047594
486	SORBI-3006G034000	0.418825	Zm00001d004169	0.194853	Zm00001d025098	#N/A		10	0	6	0	-0.625	Not_Neo																							Zm00001d037567				-0.5	Not_Neo	#N/A	Zm00001d047597
487	SORBI-3006G034500	0.0808951	Zm00001d004172	0.122732	Zm00001d025100	#N/A	Cellulose synthase	0	3	13	0	-0.1875	Not_Neo																							Zm00001d037569				-1	M1	#N/A	Zm00001d047744
488	SORBI-3006G037300	0.0321802	Zm00001d004198	0.195869	Zm00001d025126	#N/A		1	2	9	12	0.0277778	M2																							Zm00001d037573				0	Not_Neo	#N/A	Zm00001d047754
489	SORBI-3006G036300	0.0377532	Zm00001d004203	0.0494279	Zm00001d025099	#N/A		1	1	3	16	0.16	M2																							Zm00001d037574				-0.1875	Not_Neo	#N/A	Zm00001d047757
490	SORBI-3006G028100	0.0690733	Zm00001d004293	0.11288	Zm00001d025025	0.0857559		0	4	12	0	-0.25	Not_Neo																							Zm00001d037576				0.296875	Not_Neo	#N/A	Zm00001d047786
491	SORBI-3006G027200	0.290496	Zm00001d004300	0.264316	Zm00001d025027	#N/A	Heavy-metal-associated domain	0	1	15	0	-0.0625	Not_Neo																							Zm00001d037582				-0.9375	Not_Neo	#N/A	Zm00001d047888
492	SORBI-3006G025300	0.0883148	Zm00001d004335	#N/A	Zm00001d025031	0.148877		0	8	8	3	-0.5	Not_Neo																							Zm00001d037586				-1	M1	#N/A	Zm00001d047938
493	SORBI-3006G024700	0.252486	Zm00001d004339	#N/A	Zm00001d025034	0.662092		1	15	0	0	0.015625	Not_Neo																							Zm00001d037590				-1	Not_Neo	#N/A	Zm00001d047939
494	SORBI-3006G018400	0.177924	Zm00001d004357	#N/A	Zm00001d025055	#N/A		1	2	1	16	0.25	M1_M2																							Zm00001d037596				0	Not_Neo	#N/A	Zm00001d047977
495	SORBI-3006G021900	0.170584	Zm00001d004361	#N/A	Zm00001d025043	0.373924		0	0	3	16	0	M2																							Zm00001d037602				-0.0625	Not_Neo	#N/A	Zm00001d048154
496	SORBI-3006G022200	0.172121	Zm00001d004361	#N/A	Zm00001d025043	0.373924		0	3	3	16	-0.5	M2																							Zm00001d037737				-0.8125	Not_Neo	#N/A	Zm00001d048218
497	SORBI-3006G024000	0.187596	Zm00001d004366	#N/A	Zm00001d025037	0.136145		4	6	6	2	0.34375	Not_Neo																							Zm00001d037738				0.231405	M1_M2	#N/A	Zm00001d048220
498	SORBI-3006G018800	0.112748	Zm00001d004372	0.14162	Zm00001d025050	0.200792	Ribosomal protein L30p/L7e	0	8	8	0	-0.5	Not_Neo																							Zm00001d037894				-0.916667	M2	#N/A	Zm00001d048230
499	SORBI-3006G019300	0.217999	Zm00001d004383	0.440567	Zm00001d025048	0.0472665		0	0	16	0	0	Not_Neo																							Zm00001d037897				0.015625	Not_Neo	#N/A	Zm00001d048234
500	SORBI-3006G021700	0.105129	Zm00001d004396	0.245431	Zm00001d025044	0.524585		0	0	16	0	0	Not_Neo																							Zm00001d038087				-0.4375	Not_Neo	#N/A	Zm00001d048235
501	SORBI-3006G015900	0.147275	Zm00001d004437	0.102085	Zm00001d024872	0.0850281		1	7	1	12	0.0493827	Not_Neo																							Zm00001d038088				-0.1875	Not_Neo	#N/A	Zm00001d048236
502	SORBI-3006G015600	0.230242	Zm00001d004439	0.358981	Zm00001d024866	0.329588		3	2	6	16	0.165289	M1_M2																							Zm00001d038089				-0.4375	Not_Neo	#N/A	Zm00001d048270
503	SORBI-3006G009800	0.0593662	Zm00001d004496	#N/A	Zm00001d024879	0.348289		10	0	0	14	-1	M1																							Zm00001d038091				0	Not_Neo	#N/A	Zm00001d048424
504	SORBI-3006G009500	0.127423	Zm00001d004497	#N/A	Zm00001d024883	0.21539		0	15	1	0	-0.9375	Not_Neo																							Zm00001d038092				-0.571429	M2	#N/A	Zm00001d048430
505	SORBI-3006G008600	0.247726	Zm00001d004517	0.175191	Zm00001d024889	0.318109		0	7	9	0	-0.4375	Not_Neo																							Zm00001d038136				-0.230769	M2	#N/A	Zm00001d048432
506	SORBI-3006G002800	0.212356	Zm00001d004541	0.457185	Zm00001d024928	0.496169		14	0	2	0	-0.875	Not_Neo																							Zm00001d038139				-0.625	Not_Neo	#N/A	Zm00001d048460
507	SORBI-3006G002700	0.000110363	Zm00001d004543	0.599824	Zm00001d024933	0.114197		0	0	16	0	0	Not_Neo																							Zm00001d038146				-0.25	Not_Neo	#N/A	Zm00001d048481
508	SORBI-3006G002600	0.0703743	Zm00001d004545	#N/A	Zm00001d024934	#N/A		0	6	10	0	-0.375	Not_Neo																							Zm00001d038167				-0.6875	Not_Neo	#N/A	Zm00001d049457
509	SORBI-3006G002500	0.782014	Zm00001d004546	0.421458	Zm00001d024935	0.448227		14	0	2	0	-0.875	Not_Neo																							Zm00001d038263				0.015625	Not_Neo	#N/A	Zm00001d049459
510	SORBI-3006G002300	0.172944	Zm00001d004547	0.361177	Zm00001d024937	0.174039		0	15	1	10	-0.9375	Not_Neo																							Zm00001d038281				-1	Not_Neo	#N/A	Zm00001d049464
511	SORBI-3006G002201	0.151821	Zm00001d004551	0.950134	Zm00001d024938	0.364445		0	7	9	0	-0.4375	Not_Neo																							Zm00001d038282				-0.0625	Not_Neo	#N/A	Zm00001d049510
512	SORBI-3006G002000	0.2681	Zm00001d004552	0.459486	Zm00001d024939	0.366335		12	0	4	0	-0.75	Not_Neo																							Zm00001d038283				-0.3125	Not_Neo	#N/A	Zm00001d049746
513	SORBI-3006G002100	0.15891	Zm00001d004552	0.459486	Zm00001d024939	0.366335		12	0	4	0	-0.75	Not_Neo																							Zm00001d038494				-0.727273	M1	#N/A	Zm00001d049815
514	SORBI-3006G001200	#N/A	Zm00001d004553	#N/A	Zm00001d024940	#N/A	Microtubule associated protein (MAP65/ASE1 family)	1	0	15	3	-0.0625	Not_Neo																							Zm00001d038892				0.265625	Not_Neo	#N/A	Zm00001d049860
515	SORBI-3006G001100	0.306864	Zm00001d004554	0.144307	Zm00001d024941	0.166937		4	0	9	15	-0.307692	M1																							Zm00001d038894				-1	Not_Neo	#N/A	Zm00001d049873
516	SORBI-3006G000900	0.215108	Zm00001d004557	0.270208	Zm00001d024947	0.333738		0	8	6	14	-0.571429	M2																							Zm00001d039131				0	Not_Neo	#N/A	Zm00001d049886
517	SORBI-3006G000400	0.194465	Zm00001d004561	0.177789	Zm00001d024951	0.104191		0	0	16	0	0	Not_Neo																							Zm00001d039488				0.015625	Not_Neo	#N/A	Zm00001d049888
518	SORBI-3006G000100	#N/A	Zm00001d004564	#N/A	Zm00001d024952	#N/A		0	6	10	0	-0.375	Not_Neo																							Zm00001d039489				-0.4375	Not_Neo	#N/A	Zm00001d049894
519	SORBI-3010G230700	#N/A	Zm00001d014355	#N/A	Zm00001d036570	#N/A		16	0	0	0	-1	Not_Neo																							Zm00001d039510				-0.4375	Not_Neo	#N/A	Zm00001d049894
520	SORBI-3010G230600	0.213895	Zm00001d014358	0.405654	Zm00001d036571	0.611922		1	0	15	0	-0.0625	Not_Neo																							Zm00001d039512				-0.75	Not_Neo	#N/A	Zm00001d050018
521	SORBI-3010G230500	0.164135	Zm00001d014360	0.179355	Zm00001d036573	0.459814		0	15	1	1	-0.9375	Not_Neo																							Zm00001d039513				0.015625	Not_Neo	#N/A	Zm00001d050019
522	SORBI-3010G229300	0.0727786	Zm00001d014368	0.0437146	Zm00001d036588	0.282489		13	0	0	11	-1	M1																							Zm00001d039596				-0.8125	Not_Neo	#N/A	Zm00001d050020
523	SORBI-3010G229000	0.0905711	Zm00001d014377	#N/A	Zm00001d036593	0.286684		16	0	0	0	-1	Not_Neo																							Zm00001d039598				-0.5625	Not_Neo	#N/A	Zm00001d050251
524	SORBI-3010G228700	0.0379859	Zm00001d014378	#N/A	Zm00001d036594	0.224536		16	0	0	1	-1	Not_Neo																							Zm00001d039661				-0.3125	Not_Neo	#N/A	Zm00001d050253
525	SORBI-3010G228600	0.140077	Zm00001d014381	#N/A	Zm00001d036597	0.189681		0	15	1	0	-0.9375	Not_Neo																							Zm00001d039680				0	Not_Neo	#N/A	Zm00001d050393
526	SORBI-3010G228500	0.289164	Zm00001d014382	#N/A	Zm00001d036598	0.632096		12	0	4	0	-0.75	Not_Neo																							Zm00001d039682				-0.5	M1_M2	#N/A	Zm00001d050394
527	SORBI-3010G227200	0.0858533	Zm00001d014412	#N/A	Zm00001d036610	0.286451	Phosphorylase superfamily	4	1	10	15	0.0177778	M1																							Zm00001d039683				-0.8125	Not_Neo	#N/A	Zm00001d050544
528	SORBI-3010G231800	0.582104	Zm00001d014462	#N/A	Zm00001d036567	#N/A		0	6	0	16	-1	M2																							Zm00001d039685				-0.125	Not_Neo	#N/A	Zm00001d050551
529	SORBI-3010G233000	0.2757	Zm00001d014472	0.567126	Zm00001d036560	0.330943	Oxidoreductase molybdopterin binding domain	1	0	15	0	-0.0625	Not_Neo																							Zm00001d039686				-0.714286	M1	#N/A	Zm00001d050557
530	SORBI-3010G234800	0.512004	Zm00001d014495	0.423837	Zm00001d036558	0.408483		0	10	4	15	-0.714286	M2																							Zm00001d039687				-0.6875	Not_Neo	#N/A	Zm00001d050715
531	SORBI-3010G236500	0.510409	Zm00001d014513	0.549392	Zm00001d036550	0.315477	Exo70 exocyst complex subunit	16	0	0	0	-1	Not_Neo																							Zm00001d039691				0	Not_Neo	#N/A	Zm00001d050716
532	SORBI-3010G237000	0.361871	Zm00001d014519	0.566187	Zm00001d036547	0.396008		10	0	6	0	-0.625	Not_Neo																							Zm00001d039693				-0.6875	Not_Neo	#N/A	Zm00001d050723
533	SORBI-3010G238800	0.0585148	Zm00001d014525	0.121083	Zm00001d036543	0.11972		8	0	8	0	-0.5	Not_Neo																							Zm00001d039732				0	Not_Neo	#N/A	Zm00001d050737
534	SORBI-3010G237650	0.0443273	Zm00001d014550	0.0758092	Zm00001d036546	0.30564	Tim17/Tim22/Tim23/Pmp24 family	0	14	2	0	-0.875	Not_Neo																							Zm00001d039947				-0.416667	M2	#N/A	Zm00001d050741
535	SORBI-3010G242200	0.255485	Zm00001d014553	0.474245	Zm00001d036533	0.233342		0	16	0	0	-1	Not_Neo																							Zm00001d039994				-0.857143	M1	#N/A	Zm00001d050748
536	SORBI-3010G241500	0.366833	Zm00001d014557	0.453147	Zm00001d036534	0.311158		6	2	0	1	0.5	Not_Neo																							Zm00001d039997				-0.3125	Not_Neo	#N/A	Zm00001d050753
537	SORBI-3010G241000	#N/A	Zm00001d014564	#N/A	Zm00001d036535	#N/A		9	3	1	9	0.497041	Not_Neo																							Zm00001d040006				0	Not_Neo	#N/A	Zm00001d051067
538	SORBI-3010G240900	0.0814444	Zm00001d014565	#N/A	Zm00001d036536	#N/A		0	7	9	0	-0.4375	Not_Neo																							Zm00001d040028				-1	Not_Neo	#N/A	Zm00001d051069
539	SORBI-3010G243100	0.500913	Zm00001d014584	0.472253	Zm00001d036531	0.742171		8	0	2	16	-0.8	M1																							Zm00001d040035				0.203125	Not_Neo	#N/A	Zm00001d051080
540	SORBI-3010G243400	0.0490786	Zm00001d014587	0.0948235	Zm00001d036529	#N/A		7	1	8	0	0.015625	Not_Neo																							Zm00001d040163				-0.75	Not_Neo	#N/A	Zm00001d051119
541	SORBI-3010G243900	0.0650827	Zm00001d014594	0.251615	Zm00001d036524	0.159403		0	16	0	0	-1	Not_Neo																							Zm00001d040164				-0.8125	Not_Neo	#N/A	Zm00001d051239
542	SORBI-3010G244500	1020.88	Zm00001d014597	0.454924	Zm00001d036522	0.559967		0	10	6	0	-0.625	Not_Neo																							Zm00001d040169				-0.866667	M1	#N/A	Zm00001d051329
543	SORBI-3010G247800	#N/A	Zm00001d014640	#N/A	Zm00001d036507	#N/A	Prolyl oligopeptidase family	1	0	15	0	-0.0625	Not_Neo																							Zm00001d040583				-0.375	Not_Neo	#N/A	Zm00001d051507
544	SORBI-3010G248000	0.0573669	Zm00001d014641	#N/A	Zm00001d036506	#N/A		16	0	0	0	-1	Not_Neo																							Zm00001d040589				-0.666667	M2	#N/A	Zm00001d051527
545	SORBI-3010G249100	0.13593	Zm00001d014655	0.102472	Zm00001d036495	0.338811		11	0	5	0	-0.6875	Not_Neo																							Zm00001d042057				0.078125	Not_Neo	#N/A	Zm00001d051550
546	SORBI-3010G249200	0.139295	Zm00001d014656	0.326535	Zm00001d036494	0.359142		0	0	16	5	0	Not_Neo																							Zm00001d042059				-1	Not_Neo	#N/A	Zm00001d051552
547	SORBI-3010G250100	0.187933	Zm00001d014664	0.277367	Zm00001d036485	0.291778		15	0	1	1	-0.9375	Not_Neo																							Zm00001d042060				-0.625	Not_Neo	#N/A	Zm00001d051554
548	SORBI-3010G250400	0.0571408	Zm00001d014665	0.079968	Zm00001d036483	0.144755		16	0	0	0	-1	Not_Neo																							Zm00001d042135				0.015625	Not_Neo	#N/A	Zm00001d051561
549	SORBI-3010G250800	0.0485684	Zm00001d014668	0.169596	Zm00001d036482	0.108535		1	0	15	0	-0.0625	Not_Neo																							Zm00001d042302				-1	Not_Neo	#N/A	Zm00001d051562
550	SORBI-3010G251000	#N/A	Zm00001d014671	#N/A	Zm00001d036481	#N/A		0	14	2	0	-0.875	Not_Neo																							Zm00001d042303				-0.9375	Not_Neo	#N/A	Zm00001d051563
551	SORBI-3010G251100	0.00010562	Zm00001d014673	0.0420489	Zm00001d036480	0.0157293	Uracil phosphoribosyltransferase	0	0	16	0	0	Not_Neo																							Zm00001d042305				0.015625	Not_Neo	#N/A	Zm00001d051589
552	SORBI-3010G251200	0.168375	Zm00001d014674	0.253912	Zm00001d036477	0.19306		0	16	0	0	-1	Not_Neo																							Zm00001d042380				0.015625	Not_Neo	#N/A	Zm00001d051620
553	SORBI-3010G251600	9.17979e-05	Zm00001d014679	0.0293401	Zm00001d036467	0.110752		16	0	0	0	-1	Not_Neo																							Zm00001d042585				-0.1875	Not_Neo	#N/A	Zm00001d051685
554	SORBI-3010G252600	0.175251	Zm00001d014683	0.168352	Zm00001d036462	0.279062		0	0	0	16	NA	M2																							Zm00001d042624				-0.625	Not_Neo	#N/A	Zm00001d051804
555	SORBI-3010G257100	0.0797019	Zm00001d014726	0.137414	Zm00001d036448	0.138844		8	0	8	0	-0.5	Not_Neo																							Zm00001d042626				-0.1875	Not_Neo	#N/A	Zm00001d051900
556	SORBI-3010G257600	0.230903	Zm00001d014729	0.0793185	Zm00001d036443	0.0932491		0	0	16	16	0	Not_Neo																							Zm00001d042918				-0.4375	Not_Neo	#N/A	Zm00001d051901
557	SORBI-3010G257700	0.252643	Zm00001d014732	0.201163	Zm00001d036442	#N/A		3	0	0	16	-1	M1																							Zm00001d042920				-0.25	Not_Neo	#N/A	Zm00001d051902
558	SORBI-3010G258000	0.511983	Zm00001d014732	0.201163	Zm00001d036442	#N/A		16	0	0	0	-1	Not_Neo																							Zm00001d042921				-0.0625	Not_Neo	#N/A	Zm00001d052021
559	SORBI-3010G258100	0.000104051	Zm00001d014733	9.92429e-05	Zm00001d036441	0.0228403		9	0	7	0	-0.5625	Not_Neo																							Zm00001d042923				-0.0625	Not_Neo	#N/A	Zm00001d052093
560	SORBI-3010G258500	0.157674	Zm00001d014735	0.204297	Zm00001d036439	0.10234		16	0	0	0	-1	Not_Neo																							Zm00001d042926				-1	Not_Neo	#N/A	Zm00001d052198
561	SORBI-3010G258700	0.261152	Zm00001d014737	0.217926	Zm00001d036439	0.10234		10	0	4	14	-0.714286	M1																							Zm00001d042929				-0.5	Not_Neo	#N/A	Zm00001d052200
562	SORBI-3010G260500	0.0440741	Zm00001d014753	0.158537	Zm00001d036432	0.077566		8	0	8	0	-0.5	Not_Neo																							Zm00001d042930				0.35503	Not_Neo	#N/A	Zm00001d052223
563	SORBI-3010G261000	0.0865419	Zm00001d014757	0.132896	Zm00001d036431	0.123376		13	0	2	13	-0.866667	M1																							Zm00001d042931				-1	Not_Neo	#N/A	Zm00001d052225
564	SORBI-3010G261100	0.167483	Zm00001d014757	0.132896	Zm00001d036431	0.123376		14	0	2	0	-0.875	Not_Neo																							Zm00001d042955				-1	M2	#N/A	Zm00001d052227
565	SORBI-3010G261500	0.118987	Zm00001d014760	0.239359	Zm00001d036429	0.236788		9	0	7	0	-0.5625	Not_Neo																							Zm00001d042958				0	Not_Neo	#N/A	Zm00001d052229
566	SORBI-3010G261600	0.290594	Zm00001d014761	0.364067	Zm00001d036428	0.535262		2	0	14	0	-0.125	Not_Neo																							Zm00001d042968				0	Not_Neo	#N/A	Zm00001d052723
567	SORBI-3010G262100	#N/A	Zm00001d014764	#N/A	Zm00001d036422	#N/A		9	0	6	9	-0.6	M2																							Zm00001d042976				-0.75	Not_Neo	#N/A	Zm00001d052838
568	SORBI-3010G262200	0.411236	Zm00001d014765	0.120842	Zm00001d036418	0.166323		0	16	0	0	-1	Not_Neo																							Zm00001d042977				-0.5625	Not_Neo	#N/A	Zm00001d053382
569	SORBI-3010G264400	0.011374	Zm00001d014773	0.117755	Zm00001d036416	0.17154		13	0	3	0	-0.8125	Not_Neo																							Zm00001d042978				-0.933333	M2	#N/A	Zm00001d053695
570	SORBI-3010G265300	0.0893622	Zm00001d014775	0.104891	Zm00001d036410	0.211649	Nodulin-like	5	0	11	0	-0.3125	Not_Neo																							Zm00001d042980
571	SORBI-3010G266300	0.383498	Zm00001d014785	0.322863	Zm00001d036403	0.176233		0	0	16	0	0	Not_Neo																							Zm00001d042985
572	SORBI-3010G266900	0.19506	Zm00001d014789	0.428569	Zm00001d036402	0.41396		0	8	8	2	-0.5	Not_Neo																							Zm00001d042988
573	SORBI-3010G267400	0.064481	Zm00001d014792	0.148396	Zm00001d036401	0.0408986		0	12	4	0	-0.75	Not_Neo																							Zm00001d042993
574	SORBI-3010G267700	0.0784696	Zm00001d014793	0.0908883	Zm00001d036398	#N/A		1	0	1	16	-0.5	M1																							Zm00001d042996
575	SORBI-3010G267500	0.106666	Zm00001d014795	0.147868	Zm00001d036400	0.125372		15	0	1	0	-0.9375	Not_Neo																							Zm00001d042997
576	SORBI-3010G268300	0.126288	Zm00001d014797	0.0985319	Zm00001d036395	0.195905		2	0	14	0	-0.125	Not_Neo																							Zm00001d043011
577	SORBI-3010G269300	0.102091	Zm00001d014809	0.0730754	Zm00001d036387	0.193874		7	0	9	0	-0.4375	Not_Neo																							Zm00001d043013
578	SORBI-3010G269400	0.0267582	Zm00001d014811	0.230465	Zm00001d036387	0.193874		0	6	10	0	-0.375	Not_Neo																							Zm00001d043014
579	SORBI-3010G269700	0.474323	Zm00001d014814	0.189992	Zm00001d036382	0.00805319		16	0	0	0	-1	Not_Neo																							Zm00001d043015
580	SORBI-3010G273700	0.0568766	Zm00001d014843	0.768289	Zm00001d036364	0.191916		0	0	1	16	0	M1																							Zm00001d043090
581	SORBI-3010G275800	0.0864816	Zm00001d014867	0.125706	Zm00001d036351	0.0870733		0	16	0	0	-1	Not_Neo																							Zm00001d043249
582	SORBI-3010G278800	0.0539048	Zm00001d014897	0.13556	Zm00001d036331	0.373196		16	0	0	0	-1	Not_Neo																							Zm00001d043287
583	SORBI-3004G000400	0.309749	Zm00001d014912	0.412216	Zm00001d054106	0.168707		0	0	16	0	0	Not_Neo																							Zm00001d043288
584	SORBI-3004G003700	0.0753812	Zm00001d014938	0.209673	Zm00001d054080	0.100522		0	5	6	16	-0.454545	M1_M2																							Zm00001d043290
585	SORBI-3004G004200	0.377503	Zm00001d014943	0.54944	Zm00001d054076	0.451928		1	0	15	0	-0.0625	Not_Neo																							Zm00001d043295
586	SORBI-3004G004300	0.281917	Zm00001d014943	0.54944	Zm00001d054076	0.451928		1	0	15	0	-0.0625	Not_Neo																							Zm00001d043298
587	SORBI-3004G004800	0.0569635	Zm00001d014947	0.0299223	Zm00001d054075	0.0887395		16	0	0	0	-1	Not_Neo																							Zm00001d043301
588	SORBI-3004G005000	0.11098	Zm00001d014949	0.141453	Zm00001d054074	0.00513939		0	12	1	6	-0.923077	M2																							Zm00001d043303
589	SORBI-3004G005100	0.592391	Zm00001d014950	0.342563	Zm00001d054072	0.492067	Haloacid dehalogenase-like hydrolase	0	0	15	14	0	M1																							Zm00001d043401
590	SORBI-3004G005300	0.087246	Zm00001d014952	0.356676	Zm00001d054071	0.308313		3	9	4	9	0.328125	Not_Neo																							Zm00001d043461
591	SORBI-3004G006700	0.0173433	Zm00001d014961	0.123296	Zm00001d054069	0.0104452		1	0	15	0	-0.0625	Not_Neo																							Zm00001d043462
592	SORBI-3004G007600	#N/A	Zm00001d014965	#N/A	Zm00001d054066	#N/A		0	15	1	0	-0.9375	Not_Neo																							Zm00001d043463
593	SORBI-3004G008400	9.80108e-05	Zm00001d014969	9.69673e-05	Zm00001d054065	#N/A		15	0	1	0	-0.9375	Not_Neo																							Zm00001d043464
594	SORBI-3004G009200	0.0444169	Zm00001d014976	0.0608294	Zm00001d054060	0.0856252	Natural resistance-associated macrophage protein	11	0	0	12	-1	M1																							Zm00001d043465
595	SORBI-3004G009400	0.043307	Zm00001d014976	0.0608294	Zm00001d054060	0.0856252	Natural resistance-associated macrophage protein	3	0	0	15	-1	M1																							Zm00001d043470
596	SORBI-3004G009500	0.0486235	Zm00001d014976	0.0608294	Zm00001d054060	0.0856252	Natural resistance-associated macrophage protein	2	0	0	16	-1	M1																							Zm00001d043473
597	SORBI-3004G011000	0.264459	Zm00001d014988	0.407643	Zm00001d054047	0.172166		0	7	9	0	-0.4375	Not_Neo																							Zm00001d043474
598	SORBI-3004G011700	0.153135	Zm00001d014993	0.0265023	Zm00001d054043	0.0267198		2	0	14	0	-0.125	Not_Neo																							Zm00001d043663
599	SORBI-3004G012000	0.0733436	Zm00001d014994	0.398921	Zm00001d054039	0.125842		0	15	1	0	-0.9375	Not_Neo																							Zm00001d043665
600	SORBI-3004G012100	0.0795488	Zm00001d014995	0.20671	Zm00001d054038	0.172122		0	5	11	0	-0.3125	Not_Neo																							Zm00001d043666
601	SORBI-3004G013100	0.0487159	Zm00001d015006	0.211174	Zm00001d054017	#N/A		0	15	1	1	-0.9375	Not_Neo																							Zm00001d043726
602	SORBI-3004G013200	0.504769	Zm00001d015007	0.237584	Zm00001d054016	0.160693		0	0	10	16	0	M2																							Zm00001d043727
603	SORBI-3004G013300	0.21029	Zm00001d015007	0.237584	Zm00001d054016	0.160693		0	6	10	1	-0.375	Not_Neo																							Zm00001d043789
604	SORBI-3004G014000	0.0862007	Zm00001d015012	0.37908	Zm00001d054014	0.160251		3	2	11	0	0.078125	Not_Neo																							Zm00001d043795
605	SORBI-3004G017900	9.84494e-05	Zm00001d015036	8.91742e-05	Zm00001d053899	0.0304315		0	1	15	0	-0.0625	Not_Neo																							Zm00001d043937
606	SORBI-3004G018100	0.255611	Zm00001d015037	0.0957612	Zm00001d053901	0.329374		0	6	10	0	-0.375	Not_Neo																							Zm00001d044147
607	SORBI-3004G019600	9.84543e-05	Zm00001d015058	9.8442e-05	Zm00001d053919	0.446338		0	0	16	0	0	Not_Neo																							Zm00001d044385
608	SORBI-3004G020000	0.0681915	Zm00001d015061	0.168522	Zm00001d053923	0.0803499		0	14	2	0	-0.875	Not_Neo																							Zm00001d044386
609	SORBI-3004G023200	0.103003	Zm00001d015084	0.108496	Zm00001d053939	0.176115		16	0	0	0	-1	Not_Neo																							Zm00001d044747
610	SORBI-3004G023900	0.0750702	Zm00001d015088	0.129555	Zm00001d053960	0.384163	BRCT domain, a BRCA1 C-terminus domain	16	0	0	0	-1	Not_Neo																							Zm00001d044945
611	SORBI-3004G024200	0.181274	Zm00001d015091	0.164554	Zm00001d053952	0.153563		14	0	2	0	-0.875	Not_Neo																							Zm00001d045145
612	SORBI-3004G024600	0.190429	Zm00001d015095	#N/A	Zm00001d053953	#N/A		16	0	0	0	-1	Not_Neo																							Zm00001d045146
613	SORBI-3004G025400	0.571624	Zm00001d015103	0.513505	Zm00001d053957	0.102873		11	0	5	0	-0.6875	Not_Neo																							Zm00001d045147
614	SORBI-3004G026400	0.221801	Zm00001d015116	0.589429	Zm00001d053966	0.337274		0	15	1	0	-0.9375	Not_Neo																							Zm00001d045149
615	SORBI-3004G026700	0.311317	Zm00001d015118	0.448863	Zm00001d053967	0.144292		0	8	8	0	-0.5	Not_Neo																							Zm00001d045217
616	SORBI-3004G027500	#N/A	Zm00001d015120	#N/A	Zm00001d053968	#N/A	Myb-like DNA-binding domain	0	0	16	0	0	Not_Neo																							Zm00001d045417
617	SORBI-3004G028000	#N/A	Zm00001d015125	#N/A	Zm00001d053976	#N/A		0	14	2	0	-0.875	Not_Neo																							Zm00001d046695
618	SORBI-3004G028400	0.181119	Zm00001d015127	0.289095	Zm00001d053979	#N/A		0	16	0	0	-1	Not_Neo																							Zm00001d046700
619	SORBI-3004G030000	0.136234	Zm00001d015134	0.772448	Zm00001d053983	0.128114		9	0	7	0	-0.5625	Not_Neo																							Zm00001d046705
620	SORBI-3004G030100	0.307306	Zm00001d015135	0.1966	Zm00001d053984	0.423954		4	0	12	0	-0.25	Not_Neo																							Zm00001d046714
621	SORBI-3004G030400	0.412114	Zm00001d015141	0.441182	Zm00001d053985	0.630727		0	2	13	5	-0.133333	M1																							Zm00001d046896
622	SORBI-3004G030700	0.522163	Zm00001d015148	0.346443	Zm00001d053987	0.433657		0	0	16	1	0	Not_Neo																							Zm00001d046897
623	SORBI-3004G031100	0.106994	Zm00001d015153	0.0451978	Zm00001d053988	0.267825		0	15	0	14	-1	M2																							Zm00001d046898
624	SORBI-3004G031800	0.0567475	Zm00001d015174	0.381917	Zm00001d053994	0.182971		0	0	16	0	0	Not_Neo																							Zm00001d046900
625	SORBI-3004G032500	0.233265	Zm00001d015184	0.688438	Zm00001d053996	0.107687		0	15	1	1	-0.9375	Not_Neo																							Zm00001d046945
626	SORBI-3004G033000	0.0337303	Zm00001d015186	0.0487704	Zm00001d054000	0.121697	Adenylosuccinate synthetase	10	0	6	0	-0.625	Not_Neo																							Zm00001d048588
627	SORBI-3004G034900	0.129351	Zm00001d015209	0.235883	Zm00001d054003	0.260523		0	1	15	0	-0.0625	Not_Neo																							Zm00001d048908
628	SORBI-3004G036700	0.180164	Zm00001d015229	0.182555	Zm00001d054001	0.124695		0	16	0	0	-1	Not_Neo																							Zm00001d048970
629	SORBI-3004G036900	0.635071	Zm00001d015233	0.399068	Zm00001d053890	0.232287	Oleosin	0	12	4	0	-0.75	Not_Neo																							Zm00001d048975
630	SORBI-3004G037100	0.357913	Zm00001d015234	0.0813294	Zm00001d053889	0.129961		0	0	16	7	0	Not_Neo																							Zm00001d048978
631	SORBI-3004G037200	0.141667	Zm00001d015234	0.0813294	Zm00001d053889	0.129961		0	0	16	0	0	Not_Neo																							Zm00001d049059
632	SORBI-3004G039100	0.17007	Zm00001d015247	0.14577	Zm00001d053883	0.135153		3	3	10	0	0.140625	Not_Neo																							Zm00001d049071
633	SORBI-3004G039200	0.0153235	Zm00001d015248	0.0252575	Zm00001d053882	0.0416653		16	0	0	0	-1	Not_Neo																							Zm00001d049092
634	SORBI-3004G039600	9.60442e-05	Zm00001d015259	0.010989	Zm00001d053881	0.0256521		0	1	15	0	-0.0625	Not_Neo																							Zm00001d049239
635	SORBI-3004G042900	0.372474	Zm00001d015293	0.346019	Zm00001d053875	0.366667		0	0	16	0	0	Not_Neo																							Zm00001d049294
636	SORBI-3004G044500	0.28096	Zm00001d015298	0.289724	Zm00001d053867	0.302349		0	10	2	16	-0.833333	M2																							Zm00001d049295
637	SORBI-3004G044700	0.336915	Zm00001d015298	0.289724	Zm00001d053867	0.302349		0	1	2	16	-0.333333	M2																							Zm00001d052340
638	SORBI-3004G044800	0.318755	Zm00001d015298	0.289724	Zm00001d053867	0.302349		0	11	2	16	-0.846154	M2																							Zm00001d052386
639	SORBI-3004G045300	#N/A	Zm00001d015300	#N/A	Zm00001d053865	#N/A		16	0	0	0	-1	Not_Neo																							Zm00001d052625
640	SORBI-3004G045400	#N/A	Zm00001d015301	#N/A	Zm00001d053863	#N/A		0	16	0	0	-1	Not_Neo																							Zm00001d052627
641	SORBI-3004G047400	0.230075	Zm00001d015306	0.283319	Zm00001d053856	0.210666		3	2	11	1	0.078125	Not_Neo																							Zm00001d052628
642	SORBI-3004G049100	0.138421	Zm00001d015319	0.16884	Zm00001d053848	0.178505		0	2	14	2	-0.125	Not_Neo																							Zm00001d053038
643	SORBI-3004G049900	9.85797e-05	Zm00001d015327	0.000100454	Zm00001d053834	0.00947442		0	0	16	0	0	Not_Neo																							Zm00001d053042
644	SORBI-3004G050000	9.97492e-05	Zm00001d015327	0.000100454	Zm00001d053834	0.00947442		0	0	16	0	0	Not_Neo																							Zm00001d005100
645	SORBI-3004G050100	0.00550138	Zm00001d015327	0.000100454	Zm00001d053838	0.000100831		4	0	12	0	-0.25	Not_Neo																							Zm00001d005238
646	SORBI-3004G052200	0.0773097	Zm00001d015338	0.141272	Zm00001d053817	0.182046		7	0	0	16	-1	M1																							Zm00001d005239
647	SORBI-3004G053400	0.0397497	Zm00001d015354	0.745592	Zm00001d053815	0.164188		11	0	4	11	-0.733333	Not_Neo																							Zm00001d005338
648	SORBI-3004G054500	0.0573969	Zm00001d015366	0.0825857	Zm00001d053807	0.129857		7	0	0	16	-1	M1																							Zm00001d005343
649	SORBI-3004G054600	0.204047	Zm00001d015366	0.0825857	Zm00001d053807	0.129857		15	0	0	15	-1	M1																							Zm00001d005344
650	SORBI-3004G055700	0.127082	Zm00001d015378	0.134317	Zm00001d053800	0.124084	CBS domain	14	0	2	0	-0.875	Not_Neo																							Zm00001d005359
651	SORBI-3004G056400	0.210266	Zm00001d015383	0.136986	Zm00001d053798	0.273347		8	0	8	0	-0.5	Not_Neo																							Zm00001d005368
652	SORBI-3004G058000	0.292866	Zm00001d015397	0.287944	Zm00001d053781	0.610502		0	12	4	0	-0.75	Not_Neo																							Zm00001d005370
653	SORBI-3004G058500	0.559986	Zm00001d015401	0.166233	Zm00001d053778	0.118898		0	0	16	0	0	Not_Neo																							Zm00001d005372
654	SORBI-3004G058600	0.20604	Zm00001d015406	0.269495	Zm00001d053776	0.0788133		0	8	8	0	-0.5	Not_Neo																							Zm00001d005373
655	SORBI-3004G058900	0.165052	Zm00001d015410	0.64915	Zm00001d053775	0.381534	Myb/SANT-like DNA-binding domain	0	4	12	8	-0.25	Not_Neo																							Zm00001d005399
656	SORBI-3004G059200	0.118121	Zm00001d015414	0.0590219	Zm00001d053769	0.0897907		1	0	4	16	-0.2	M1_M2																							Zm00001d005402
657	SORBI-3004G060100	0.0252324	Zm00001d015426	0.0318669	Zm00001d053765	0.043543		0	16	0	0	-1	Not_Neo																							Zm00001d005410
658	SORBI-3004G060300	0.215937	Zm00001d015429	0.101097	Zm00001d053763	0.192038		3	0	13	0	-0.1875	Not_Neo																							Zm00001d005978
659	SORBI-3004G060600	0.147775	Zm00001d015433	1.15053	Zm00001d053762	0.421346		1	1	14	0	0.015625	Not_Neo																							Zm00001d005980
660	SORBI-3004G060900	0.405973	Zm00001d015435	0.232206	Zm00001d053761	0.403995		3	0	13	0	-0.1875	Not_Neo																							Zm00001d005981
661	SORBI-3004G062400	0.930797	Zm00001d015460	0.0807053	Zm00001d053754	9.95718e-05	Exostosin family	0	2	14	0	-0.125	Not_Neo																							Zm00001d006008
662	SORBI-3004G063100	0.224617	Zm00001d015464	0.156819	Zm00001d053753	0.256431		0	0	16	0	0	Not_Neo																							Zm00001d006098
663	SORBI-3004G063500	0.000100731	Zm00001d015473	0.000112431	Zm00001d053731	#N/A		16	0	0	0	-1	Not_Neo																							Zm00001d006207
664	SORBI-3004G063600	0.109033	Zm00001d015474	0.0796642	Zm00001d053732	0.0524036		0	0	16	0	0	Not_Neo																							Zm00001d006319
665	SORBI-3004G063750	0.380617	Zm00001d015475	0.229363	Zm00001d053734	0.339554		1	1	2	16	0.25	M1_M2																							Zm00001d006320
666	SORBI-3004G064800	0.319522	Zm00001d015491	0.141241	Zm00001d053739	0.0122754		0	11	0	15	-1	M2																							Zm00001d006321
667	SORBI-3004G065000	0.145985	Zm00001d015493	0.31163	Zm00001d053741	0.298464		0	15	1	0	-0.9375	Not_Neo																							Zm00001d006322
668	SORBI-3004G065300	0.0442463	Zm00001d015505	0.118889	Zm00001d053743	0.127735		3	0	13	0	-0.1875	Not_Neo																							Zm00001d006324
669	SORBI-3004G065900	0.0772318	Zm00001d015515	0.237687	Zm00001d053746	0.610855		0	0	15	12	0	M1																							Zm00001d006606
670	SORBI-3004G067000	0.136638	Zm00001d015546	0.244316	Zm00001d053748	0.25026		0	0	16	0	0	Not_Neo																							Zm00001d006744
671	SORBI-3004G067100	0.0309909	Zm00001d015549	0.000101544	Zm00001d053749	0.234622		0	3	13	0	-0.1875	Not_Neo																							Zm00001d007071
672	SORBI-3004G067200	981.278	Zm00001d015550	0.176648	Zm00001d053750	0.321078	Hsp70 protein	5	4	5	14	0.387755	M1_M2																							Zm00001d007075
673	SORBI-3004G067600	0.320442	Zm00001d015550	0.176648	Zm00001d053750	0.321078	Hsp70 protein	4	5	5	14	0.387755	M1																							Zm00001d007113
674	SORBI-3004G068200	0.137148	Zm00001d015568	0.394992	Zm00001d053728	0.239672		0	0	16	0	0	Not_Neo																							Zm00001d007117
675	SORBI-3004G068300	0.0898466	Zm00001d015569	0.0738827	Zm00001d053727	0.113753		14	0	0	13	-1	M1																							Zm00001d007213
676	SORBI-3004G069200	0.181991	Zm00001d015581	0.218896	Zm00001d053725	0.0737594		0	13	3	0	-0.8125	Not_Neo																							Zm00001d007216
677	SORBI-3004G069500	0.0416495	Zm00001d015586	0.133969	Zm00001d053724	0.048998		2	0	14	0	-0.125	Not_Neo																							Zm00001d007225
678	SORBI-3004G070100	0.0434686	Zm00001d015600	0.0802038	Zm00001d053719	0.166973		5	0	11	1	-0.3125	Not_Neo																							Zm00001d007226
679	SORBI-3004G070200	#N/A	Zm00001d015605	#N/A	Zm00001d053718	#N/A		0	15	0	5	-1	M2																							Zm00001d007228
680	SORBI-3004G070800	0.375834	Zm00001d015613	0.414044	Zm00001d053716	0.258247		16	0	0	0	-1	Not_Neo																							Zm00001d007379
681	SORBI-3004G071200	0.1002	Zm00001d015623	0.0823546	Zm00001d053715	0.0997164		0	10	0	13	-1	M2																							Zm00001d007418
682	SORBI-3004G072000	0.0929046	Zm00001d015628	0.0796778	Zm00001d053713	0.0393991		7	3	5	14	0.302222	Not_Neo																							Zm00001d007419
683	SORBI-3004G072200	9.17789e-05	Zm00001d015635	0.308111	Zm00001d053709	0.120586		0	0	16	0	0	Not_Neo																							Zm00001d007420
684	SORBI-3004G072800	0.274566	Zm00001d015635	0.308111	Zm00001d053709	0.120586		0	0	16	0	0	Not_Neo																							Zm00001d007636
685	SORBI-3004G073100	0.098555	Zm00001d015639	0.0778373	Zm00001d053707	0.0796462		15	0	1	0	-0.9375	Not_Neo																							Zm00001d007638
686	SORBI-3004G074200	0.165844	Zm00001d015656	0.255678	Zm00001d053705	0.275656		16	0	0	0	-1	Not_Neo																							Zm00001d007639
687	SORBI-3004G074700	0.431042	Zm00001d015664	0.331416	Zm00001d053703	0.334899		1	0	1	16	-0.5	M2																							Zm00001d007640
688	SORBI-3004G074900	0.199512	Zm00001d015665	0.1486	Zm00001d053702	0.177264		0	16	0	0	-1	Not_Neo																							Zm00001d007868
689	SORBI-3004G075100	#DIV/0!	Zm00001d015686	#N/A	Zm00001d053699	0.239708		0	0	7	16	0	M1_M2																							Zm00001d008173
690	SORBI-3004G086400	0.0497371	Zm00001d015721	#N/A	Zm00001d053617	0.0173085		2	11	3	2	0.203125	Not_Neo																							Zm00001d008287
691	SORBI-3004G086200	0.281427	Zm00001d015729	#N/A	Zm00001d053620	0.46269	Galactoside-binding lectin	2	0	14	0	-0.125	Not_Neo																							Zm00001d008288
692	SORBI-3004G086000	0.0430515	Zm00001d015737	#N/A	Zm00001d053622	0.297103		0	0	16	0	0	Not_Neo																							Zm00001d008289
693	SORBI-3004G084100	0.260597	Zm00001d015767	0.15742	Zm00001d053639	0.14101		15	0	1	0	-0.9375	Not_Neo																							Zm00001d008293
694	SORBI-3004G083700	0.422747	Zm00001d015776	0.141413	Zm00001d053641	0.139177		0	14	2	0	-0.875	Not_Neo																							Zm00001d008306
695	SORBI-3004G083300	0.120844	Zm00001d015778	0.156588	Zm00001d053642	0.222829		3	0	13	0	-0.1875	Not_Neo																							Zm00001d008308
696	SORBI-3004G083200	0.47961	Zm00001d015780	0.4267	Zm00001d053643	0.527657	Exostosin family	10	0	6	0	-0.625	Not_Neo																							Zm00001d008604
697	SORBI-3004G083000	0.341967	Zm00001d015785	0.137572	Zm00001d053648	0.173719		0	3	13	0	-0.1875	Not_Neo																							Zm00001d008748
698	SORBI-3004G082900	0.000103573	Zm00001d015788	0.0432437	Zm00001d053649	0.0112822		13	0	3	0	-0.8125	Not_Neo																							Zm00001d008825
699	SORBI-3004G081900	0.182093	Zm00001d015798	0.0962297	Zm00001d053655	0.00483536		4	1	0	16	0.16	M1																							Zm00001d008839
700	SORBI-3004G080000	0.0331868	Zm00001d015825	0.117626	Zm00001d053662	0.148206		0	8	2	16	-0.8	M2																							Zm00001d008853
701	SORBI-3004G079800	0.096219	Zm00001d015837	0.152135	Zm00001d053664	0.198469		3	0	13	0	-0.1875	Not_Neo																							Zm00001d008862
702	SORBI-3004G079200	0.0363069	Zm00001d015839	0.410218	Zm00001d053667	0.30195		9	0	7	0	-0.5625	Not_Neo																							Zm00001d008893
703	SORBI-3004G079100	0.0554329	Zm00001d015842	0.190094	Zm00001d053671	0.124165		0	1	15	0	-0.0625	Not_Neo																							Zm00001d008898
704	SORBI-3004G078700	0.23019	Zm00001d015851	0.205198	Zm00001d053674	0.251395		5	0	11	1	-0.3125	Not_Neo																							Zm00001d008916
705	SORBI-3004G078000	0.0222869	Zm00001d015856	0.121584	Zm00001d053685	0.0651184		16	0	0	0	-1	Not_Neo																							Zm00001d008919
706	SORBI-3004G077100	0.648872	Zm00001d015863	0.402249	Zm00001d053694	0.587059		16	0	0	0	-1	Not_Neo																							Zm00001d008922
707	SORBI-3004G076100	0.0918606	Zm00001d015884	#N/A	Zm00001d053695	0.128084		0	14	1	12	-0.933333	M2																							Zm00001d008923
708	SORBI-3004G128500	1021.59	Zm00001d015918	0.474967	Zm00001d053346	#N/A		16	0	0	0	-1	Not_Neo																							Zm00001d008924
709	SORBI-3004G130900	0.0159923	Zm00001d015952	0.170122	Zm00001d053289	#N/A		6	0	10	0	-0.375	Not_Neo																							Zm00001d008925
710	SORBI-3004G129600	0.454135	Zm00001d015965	0.329406	Zm00001d053298	#N/A		15	0	1	0	-0.9375	Not_Neo																							Zm00001d009503
711	SORBI-3004G124200	0.60014	Zm00001d015992	0.177444	Zm00001d053308	#N/A		0	12	4	0	-0.75	Not_Neo																							Zm00001d009504
712	SORBI-3004G123100	0.0141478	Zm00001d016001	0.154761	Zm00001d053307	#N/A		7	3	1	14	0.561983	M1_M2																							Zm00001d009506
713	SORBI-3004G117900	0.424951	Zm00001d016044	0.277243	Zm00001d053372	0.397559		0	1	15	0	-0.0625	Not_Neo																							Zm00001d010200
714	SORBI-3004G117800	0.000106212	Zm00001d016049	0.25006	Zm00001d053371	0.0386371		0	16	0	0	-1	Not_Neo																							Zm00001d010249
715	SORBI-3004G117600	0.147844	Zm00001d016052	0.277538	Zm00001d053369	0.248557		0	1	7	15	-0.125	M1_M2																							Zm00001d010256
716	SORBI-3004G117200	0.187091	Zm00001d016061	1.22278	Zm00001d053359	0.0180351		1	5	10	3	0.015625	Not_Neo																							Zm00001d010416
717	SORBI-3004G116800	0.0612651	Zm00001d016062	0.16618	Zm00001d053352	0.183425		8	3	1	7	0.527778	Not_Neo																							Zm00001d010702
718	SORBI-3004G116600	0.062898	Zm00001d016063	0.0967407	Zm00001d053354	0.25147		3	0	13	0	-0.1875	Not_Neo																							Zm00001d010751
719	SORBI-3004G116400	997	Zm00001d016066	0.1042	Zm00001d053358	0.209388		7	4	5	1	0.390625	Not_Neo																							Zm00001d011426
720	SORBI-3004G116100	0.0288739	Zm00001d016072	0.233024	Zm00001d053377	0.32938		0	5	11	5	-0.3125	Not_Neo																							Zm00001d011427
721	SORBI-3004G116000	0.244695	Zm00001d016075	0.131961	Zm00001d053378	0.210106		9	0	7	0	-0.5625	Not_Neo																							Zm00001d011445
722	SORBI-3004G115700	0.168778	Zm00001d016081	0.242891	Zm00001d053382	0.284149		9	0	7	3	-0.5625	Not_Neo																							Zm00001d011446
723	SORBI-3004G115350	#N/A	Zm00001d016084	#N/A	Zm00001d053379	#N/A		1	1	14	0	0.015625	Not_Neo																							Zm00001d011447
724	SORBI-3004G114500	#N/A	Zm00001d016103	#N/A	Zm00001d053393	#N/A		7	1	7	11	0.0177778	M2																							Zm00001d011486
725	SORBI-3004G113800	0.0233335	Zm00001d016105	0.107754	Zm00001d053396	0.0448928		8	0	8	0	-0.5	Not_Neo																							Zm00001d011487
726	SORBI-3004G113600	0.0487108	Zm00001d016106	0.215059	Zm00001d053399	0.246016		0	0	16	0	0	Not_Neo																							Zm00001d011490
727	SORBI-3004G112300	#N/A	Zm00001d016120	#N/A	Zm00001d053410	#N/A		6	1	2	16	0.0493827	M1_M2																							Zm00001d011510
728	SORBI-3004G111100	0.161757	Zm00001d016130	0.0534365	Zm00001d053425	0.240996		15	0	1	0	-0.9375	Not_Neo																							Zm00001d011637
729	SORBI-3004G111000	0.59054	Zm00001d016131	0.18849	Zm00001d053427	0.24659		0	8	8	0	-0.5	Not_Neo																							Zm00001d011845
730	SORBI-3004G110700	#N/A	Zm00001d016132	#N/A	Zm00001d053429	#N/A		0	15	1	0	-0.9375	Not_Neo																							Zm00001d011846
731	SORBI-3004G110400	0.289815	Zm00001d016136	0.097086	Zm00001d053433	0.481912		0	0	3	16	0	M1_M2																							Zm00001d011851
732	SORBI-3004G108300	0.240395	Zm00001d016149	0.0959341	Zm00001d053438	0.336995		0	0	16	15	0	Not_Neo																							Zm00001d011853
733	SORBI-3004G108400	0.0977092	Zm00001d016149	0.0959341	Zm00001d053438	0.336995		0	0	16	0	0	Not_Neo																							Zm00001d011877
734	SORBI-3004G107900	0.0259221	Zm00001d016154	0.204799	Zm00001d053442	0.338837		0	3	13	0	-0.1875	Not_Neo																							Zm00001d011889
735	SORBI-3004G107400	991.071	Zm00001d016163	0.634666	Zm00001d053447	0.449649		4	3	9	3	0.171875	Not_Neo																							Zm00001d011890
736	SORBI-3004G107300	0.0832561	Zm00001d016164	0.253565	Zm00001d053448	0.135037		2	1	13	0	0.015625	Not_Neo																							Zm00001d011891
737	SORBI-3004G107200	0.15289	Zm00001d016165	0.114852	Zm00001d053450	0.170224		0	1	15	0	-0.0625	Not_Neo																							Zm00001d011983
738	SORBI-3004G106900	0.0572585	Zm00001d016166	0.0418358	Zm00001d053453	0.0228559		16	0	0	0	-1	Not_Neo																							Zm00001d011984
739	SORBI-3004G105700	0.0753685	Zm00001d016177	0.148548	Zm00001d053554	0.0583727		0	3	2	16	-0.6	M1_M2																							Zm00001d011985
740	SORBI-3004G106100	0.163566	Zm00001d016177	0.148548	Zm00001d053554	0.0583727		1	5	2	15	0.0625	M1_M2																							Zm00001d012040
741	SORBI-3004G105500	#N/A	Zm00001d016181	#N/A	Zm00001d053552	#N/A		4	4	8	0	0.25	Not_Neo																							Zm00001d012041
742	SORBI-3004G105200	0.0735479	Zm00001d016182	0.139756	Zm00001d053554	0.0583727		16	0	0	0	-1	Not_Neo																							Zm00001d012042
743	SORBI-3004G105100	0.177061	Zm00001d016185	0.077011	Zm00001d053554	0.0583727		16	0	0	0	-1	Not_Neo																							Zm00001d012171
744	SORBI-3004G104900	0.039884	Zm00001d016188	0.132069	Zm00001d053548	0.103866		0	0	16	0	0	Not_Neo																							Zm00001d012173
745	SORBI-3004G103800	#N/A	Zm00001d016200	#N/A	Zm00001d053547	#N/A		0	0	16	0	0	Not_Neo																							Zm00001d013086
746	SORBI-3004G104100	#N/A	Zm00001d016200	#N/A	Zm00001d053547	#N/A		0	0	16	0	0	Not_Neo																							Zm00001d025055
747	SORBI-3004G104300	#N/A	Zm00001d016200	#N/A	Zm00001d053547	#N/A		0	0	16	0	0	Not_Neo																							Zm00001d025057
748	SORBI-3004G103000	0.204538	Zm00001d016225	0.129032	Zm00001d053544	0.117598		7	1	7	13	0.0177778	M1																							Zm00001d025178
749	SORBI-3004G102400	0.408766	Zm00001d016234	0.621659	Zm00001d053541	0.498706		2	5	9	10	0.109375	Not_Neo																							Zm00001d025180
750	SORBI-3004G097100	0.122362	Zm00001d016306	0.0570271	Zm00001d053562	0.0831551		6	0	10	2	-0.375	Not_Neo																							Zm00001d025182
751	SORBI-3004G097000	0.249942	Zm00001d016307	0.148403	Zm00001d053562	0.0831551		0	12	0	13	-1	M2																							Zm00001d025185
752	SORBI-3004G096900	0.066043	Zm00001d016308	#N/A	Zm00001d053563	#N/A		0	15	0	3	-1	M2																							Zm00001d025337
753	SORBI-3004G096500	0.132976	Zm00001d016326	#N/A	Zm00001d053564	0.335252		0	0	16	0	0	Not_Neo																							Zm00001d025338
754	SORBI-3004G096300	0.0299773	Zm00001d016332	#N/A	Zm00001d053566	0.127987		0	6	10	0	-0.375	Not_Neo																							Zm00001d025340
755	SORBI-3004G096100	0.115578	Zm00001d016342	0.122273	Zm00001d053568	0.304164		5	3	1	16	0.641975	M1																							Zm00001d025342
756	SORBI-3004G095300	0.0906007	Zm00001d016349	0.316459	Zm00001d053572	0.225272		0	0	16	0	0	Not_Neo																							Zm00001d025377
757	SORBI-3004G094200	0.0972517	Zm00001d016358	0.129361	Zm00001d053576	0.246982		2	0	14	0	-0.125	Not_Neo																							Zm00001d025379
758	SORBI-3004G093600	#N/A	Zm00001d016365	#N/A	Zm00001d053580	#N/A	Core-2/I-Branching enzyme	0	0	16	0	0	Not_Neo																							Zm00001d025380
759	SORBI-3004G092500	8.11853e-05	Zm00001d016378	0.0481589	Zm00001d053589	0.067698		1	0	15	0	-0.0625	Not_Neo																							Zm00001d025460
760	SORBI-3004G091200	0.284946	Zm00001d016381	0.466926	Zm00001d053595	0.108621		0	16	0	0	-1	Not_Neo																							Zm00001d025461
761	SORBI-3004G088450	0.10747	Zm00001d016402	0.0967264	Zm00001d053609	0.127703		0	0	16	0	0	Not_Neo																							Zm00001d025462
762	SORBI-3004G088501	0.133321	Zm00001d016402	0.0967264	Zm00001d053609	0.127703		0	0	16	0	0	Not_Neo																							Zm00001d025668
763	SORBI-3004G088400	0.22113	Zm00001d016406	0.316509	Zm00001d053610	0.272152	Domain of unknown function (DUF966)	1	0	15	0	-0.0625	Not_Neo																							Zm00001d025669
764	SORBI-3004G088200	0.511075	Zm00001d016407	0.427168	Zm00001d053611	0.373156		3	0	13	0	-0.1875	Not_Neo																							Zm00001d025672
765	SORBI-3004G087700	1047.75	Zm00001d016409	0.148689	Zm00001d053612	0.143683		0	10	0	15	-1	M2																							Zm00001d025673
766	SORBI-3004G087800	1020.78	Zm00001d016409	0.148689	Zm00001d053612	0.143683		0	15	0	12	-1	M2																							Zm00001d025674
767	SORBI-3004G087600	0.181141	Zm00001d016410	0.0660244	Zm00001d053613	0.324694		16	0	0	0	-1	Not_Neo																							Zm00001d025679
768	SORBI-3004G086600	0.0312554	Zm00001d016439	0.00741087	Zm00001d053616	0.00962462		0	0	16	0	0	Not_Neo																							Zm00001d025680
769	SORBI-3004G145701	0.171293	Zm00001d016491	0.0035124	Zm00001d053239	0.0129716		0	16	0	0	-1	Not_Neo																							Zm00001d025681
770	SORBI-3004G145801	0.000183419	Zm00001d016491	0.0035124	Zm00001d053239	0.0129716		0	16	0	0	-1	Not_Neo																							Zm00001d025696
771	SORBI-3004G146500	0.405812	Zm00001d016496	0.256532	Zm00001d053245	0.352053		16	0	0	0	-1	Not_Neo																							Zm00001d025711
772	SORBI-3004G149800	0.335172	Zm00001d016516	0.474686	Zm00001d053251	0.594512		0	16	0	0	-1	Not_Neo																							Zm00001d025712
773	SORBI-3004G152300	0.320942	Zm00001d016545	0.321606	Zm00001d050544	0.186748		13	0	3	6	-0.8125	Not_Neo																							Zm00001d025716
774	SORBI-3004G153200	0.0436481	Zm00001d016552	0.221095	Zm00001d050551	0.150256		0	2	14	0	-0.125	Not_Neo																							Zm00001d026094
775	SORBI-3004G154400	0.0907087	Zm00001d016561	0.0129555	Zm00001d050557	0.0292929		5	0	2	15	-0.714286	M1																							Zm00001d026095
776	SORBI-3004G155800	0.125943	Zm00001d016572	0.164585	Zm00001d050567	0.153497		16	0	0	0	-1	Not_Neo																							Zm00001d026096
777	SORBI-3004G157700	0.369346	Zm00001d016586	0.294665	Zm00001d050580	0.320295		16	0	0	0	-1	Not_Neo																							Zm00001d026097
778	SORBI-3004G157100	0.17323	Zm00001d016590	0.228349	Zm00001d050577	0.523137	Rad9	1	2	4	16	0.0816327	M1_M2																							Zm00001d036035
779	SORBI-3004G157000	0.075049	Zm00001d016591	0.0923184	Zm00001d050575	0.106577		8	0	8	0	-0.5	Not_Neo																							Zm00001d036073
780	SORBI-3004G158300	0.159068	Zm00001d016604	0.15399	Zm00001d050583	0.158977		13	1	2	9	0.015625	Not_Neo																							Zm00001d036159
781	SORBI-3004G158400	0.160579	Zm00001d016606	0.141951	Zm00001d050584	0.522889		16	0	0	0	-1	Not_Neo																							Zm00001d036293
782	SORBI-3004G160200	0.0542909	Zm00001d016634	0.116958	Zm00001d050604	#N/A		5	0	11	0	-0.3125	Not_Neo																							Zm00001d036351
783	SORBI-3004G160700	0.103986	Zm00001d016640	0.235056	Zm00001d050606	#N/A	Cation efflux family	0	5	11	0	-0.3125	Not_Neo																							Zm00001d036357
784	SORBI-3004G162500	0.611203	Zm00001d016665	0.226068	Zm00001d050637	#N/A		16	0	0	0	-1	Not_Neo																							Zm00001d036359
785	SORBI-3004G169700	#N/A	Zm00001d016718	#N/A	Zm00001d050671	#N/A		6	0	3	15	-0.666667	M1																							Zm00001d036360
786	SORBI-3004G169900	0.0940146	Zm00001d016719	0.0951668	Zm00001d050689	0.0893906		13	0	1	5	-0.928571	M1																							Zm00001d036361
787	SORBI-3004G170200	0.0827106	Zm00001d016720	0.0976795	Zm00001d050694	0.374865	Peptidyl-tRNA hydrolase	16	0	0	0	-1	Not_Neo																							Zm00001d036485
788	SORBI-3004G170400	0	Zm00001d016722	0.490449	Zm00001d050696	0.0927749		16	0	0	0	-1	Not_Neo																							Zm00001d036521
789	SORBI-3004G170500	#N/A	Zm00001d016723	#N/A	Zm00001d050697	#N/A		0	5	11	0	-0.3125	Not_Neo																							Zm00001d036557
790	SORBI-3004G168800	0.13387	Zm00001d016732	0.290895	Zm00001d050669	#N/A		9	0	7	0	-0.5625	Not_Neo																							Zm00001d036558
791	SORBI-3004G168500	0.121011	Zm00001d016736	0.135404	Zm00001d050666	#N/A		0	10	6	0	-0.625	Not_Neo																							Zm00001d036560
792	SORBI-3004G168300	0.803622	Zm00001d016737	0.17457	Zm00001d050664	#N/A		16	0	0	0	-1	Not_Neo																							Zm00001d036588
793	SORBI-3004G170700	0.587562	Zm00001d016755	0.26281	Zm00001d050698	0.548011		4	2	10	0	0.09375	Not_Neo																							Zm00001d036589
794	SORBI-3004G170800	0.439825	Zm00001d016756	1.30839	Zm00001d050700	1.26408	Patatin-like phospholipase	16	0	0	2	-1	Not_Neo																							Zm00001d036593
795	SORBI-3004G170900	0.393821	Zm00001d016758	0.334371	Zm00001d050705	0.218225		0	13	3	0	-0.8125	Not_Neo																							Zm00001d036597
796	SORBI-3004G171700	0.0980766	Zm00001d016764	0.0729275	Zm00001d050712	0.0784712		1	1	11	16	0.0236686	M1_M2																							Zm00001d036598
797	SORBI-3004G172500	0.453242	Zm00001d016766	0.88316	Zm00001d050715	0.394001		0	11	5	9	-0.6875	Not_Neo																							Zm00001d036652
798	SORBI-3004G172700	0.037454	Zm00001d016768	0.0235007	Zm00001d050716	0.0571594		0	0	16	0	0	Not_Neo																							Zm00001d036688
799	SORBI-3004G173500	0.0564328	Zm00001d016783	0.0923337	Zm00001d050723	0.0499357		11	0	5	0	-0.6875	Not_Neo																							Zm00001d036773
800	SORBI-3004G174400	0.207312	Zm00001d016793	0.328796	Zm00001d050730	0.424363	BTB/POZ domain	9	0	7	0	-0.5625	Not_Neo																							Zm00001d036797
801	SORBI-3004G176200	0.602958	Zm00001d016822	0.225206	Zm00001d050737	0.309525		0	0	16	0	0	Not_Neo																							Zm00001d036798
802	SORBI-3004G177300	0.316886	Zm00001d016825	0.183474	Zm00001d050741	0.282719		0	5	7	15	-0.416667	M2																							Zm00001d036801
803	SORBI-3004G177500	0.172489	Zm00001d016826	0.175134	Zm00001d050748	0.156752		12	0	2	13	-0.857143	M1																							Zm00001d036802
804	SORBI-3004G177600	0.281553	Zm00001d016827	0.404845	Zm00001d050753	0.462329		0	5	11	0	-0.3125	Not_Neo																							Zm00001d036880
805	SORBI-3004G177700	0.0661931	Zm00001d016832	0.382092	Zm00001d050755	0.136312		0	16	0	0	-1	Not_Neo																							Zm00001d037136
806	SORBI-3004G178100	9.28264e-05	Zm00001d016834	0.236629	Zm00001d050775	#N/A		15	0	0	0	-1	Not_Neo																							Zm00001d037155
807	SORBI-3004G178500	0.125776	Zm00001d016838	0.172959	Zm00001d050781	0.413569		15	0	1	0	-0.9375	Not_Neo																							Zm00001d037156
808	SORBI-3004G179600	0.228118	Zm00001d016850	9.92266e-05	Zm00001d050783	#N/A	GDP-mannose 4,6 dehydratase	16	0	0	0	-1	Not_Neo																							Zm00001d037158
809	SORBI-3004G179700	0.551623	Zm00001d016851	0.864211	Zm00001d050785	0.520005		0	14	0	14	-1	M2																							Zm00001d037159
810	SORBI-3004G181600	0.10141	Zm00001d016856	0.130546	Zm00001d050800	0.340734		4	0	12	0	-0.25	Not_Neo																							Zm00001d037160
811	SORBI-3004G181700	0.118549	Zm00001d016856	0.130546	Zm00001d050800	0.340734		4	0	12	0	-0.25	Not_Neo																							Zm00001d037163
812	SORBI-3004G182900	0.0631372	Zm00001d016861	0.126214	Zm00001d050816	0.215209		8	0	8	0	-0.5	Not_Neo																							Zm00001d037164
813	SORBI-3004G186500	#N/A	Zm00001d016895	#N/A	Zm00001d050837	#N/A		7	3	6	0	0.265625	Not_Neo																							Zm00001d037165
814	SORBI-3004G186900	0.199274	Zm00001d016897	0.714411	Zm00001d050838	0.25301		0	16	0	0	-1	Not_Neo																							Zm00001d037298
815	SORBI-3004G187900	0.278195	Zm00001d016902	0.307586	Zm00001d050844	0.312177		16	0	0	0	-1	Not_Neo																							Zm00001d037299
816	SORBI-3004G188100	0.120047	Zm00001d016909	0.215642	Zm00001d050848	0.237666		1	1	2	16	0.25	M1_M2																							Zm00001d037300
817	SORBI-3004G188400	0.0465703	Zm00001d016915	0.12665	Zm00001d050850	0.203947	Sugar (and other) transporter	7	1	8	1	0.015625	Not_Neo																							Zm00001d037303
818	SORBI-3004G188500	0.144541	Zm00001d016916	0.258404	Zm00001d050851	0.645882		5	0	11	0	-0.3125	Not_Neo																							Zm00001d041495
819	SORBI-3004G189900	0.0636185	Zm00001d016928	0.102167	Zm00001d050868	0.253159		4	0	12	0	-0.25	Not_Neo																							Zm00001d041496
820	SORBI-3004G190600	0.414703	Zm00001d016935	0.154875	Zm00001d050874	0.151543		0	1	15	0	-0.0625	Not_Neo																							Zm00001d041497
821	SORBI-3004G190500	0.116463	Zm00001d016938	0.135878	Zm00001d050873	0.125864		1	1	1	15	0.444444	M1																							Zm00001d041538
822	SORBI-3004G190700	0.0802614	Zm00001d016941	0.373044	Zm00001d050884	0.313305		8	0	8	0	-0.5	Not_Neo																							Zm00001d041539
823	SORBI-3004G191700	0.163709	Zm00001d016950	0.243292	Zm00001d050893	0.495188		13	1	2	1	0.015625	Not_Neo																							Zm00001d041592
824	SORBI-3004G191901	1005.78	Zm00001d016957	0.655514	Zm00001d050897	0.139068		4	0	12	0	-0.25	Not_Neo																							Zm00001d041593
825	SORBI-3004G192400	0.541907	Zm00001d016973	0.368994	Zm00001d050903	0.20853		0	12	3	0	-0.8	Not_Neo																							Zm00001d041594
826	SORBI-3004G192700	0.313441	Zm00001d016977	0.160123	Zm00001d050905	0.208293		1	0	15	0	-0.0625	Not_Neo																							Zm00001d041595
827	SORBI-3004G192900	0.372347	Zm00001d016980	0.464426	Zm00001d050907	0.722427	Acyl-CoA dehydrogenase, middle domain	6	0	10	1	-0.375	Not_Neo																							Zm00001d041781
828	SORBI-3004G193500	9.91461e-05	Zm00001d016992	0.10415	Zm00001d050908	0.0601118		14	1	0	0	0.0177778	Not_Neo																							Zm00001d044704
829	SORBI-3004G193700	0.154491	Zm00001d016993	0.151841	Zm00001d050910	0.225819	IQ calmodulin-binding motif	0	12	4	5	-0.75	Not_Neo																							Zm00001d044705
830	SORBI-3004G194100	0.125913	Zm00001d016999	0.675534	Zm00001d050913	0.0742185		5	0	11	0	-0.3125	Not_Neo																							Zm00001d044713
831	SORBI-3004G196300	0.0878693	Zm00001d017026	0.046911	Zm00001d050915	9.92477e-05		5	0	11	0	-0.3125	Not_Neo																							Zm00001d047260
832	SORBI-3004G197600	0.935236	Zm00001d017036	0.218091	Zm00001d050917	0.207728		0	1	15	0	-0.0625	Not_Neo																							Zm00001d047349
833	SORBI-3004G198400	0.0508644	Zm00001d017047	0.0618517	Zm00001d050920	0.0738044		11	0	5	0	-0.6875	Not_Neo																							Zm00001d047353
834	SORBI-3004G198500	0.188762	Zm00001d017049	0.188849	Zm00001d050923	0.0793588		0	10	6	0	-0.625	Not_Neo																							Zm00001d047354
835	SORBI-3004G198600	0.0352969	Zm00001d017050	0.411158	Zm00001d050925	0.215543	pre-mRNA processing factor 4 (PRP4) like	0	15	1	0	-0.9375	Not_Neo																							Zm00001d047396
836	SORBI-3004G199300	0.254299	Zm00001d017060	#N/A	Zm00001d050935	#N/A	SUZ domain	11	0	5	0	-0.6875	Not_Neo																							Zm00001d047397
837	SORBI-3004G199700	0.0113999	Zm00001d017067	0.0967139	Zm00001d050943	0.101947		0	3	13	0	-0.1875	Not_Neo																							Zm00001d047399
838	SORBI-3004G200000	0.000102119	Zm00001d017070	1028.75	Zm00001d050944	982.111	short chain dehydrogenase	3	0	13	0	-0.1875	Not_Neo																							Zm00001d047594
839	SORBI-3004G200800	#N/A	Zm00001d017077	#N/A	Zm00001d050955	#N/A		0	4	0	16	-1	M2																							Zm00001d047597
840	SORBI-3004G201100	#N/A	Zm00001d017077	#N/A	Zm00001d050955	#N/A		0	13	0	11	-1	M2																							Zm00001d047739
841	SORBI-3004G201300	0.0525086	Zm00001d017079	0.161675	Zm00001d050959	0.201158		16	0	0	0	-1	Not_Neo																							Zm00001d047774
842	SORBI-3004G201600	0.564605	Zm00001d017084	0.245214	Zm00001d050960	0.582801		8	0	4	16	-0.666667	M1																							Zm00001d047775
843	SORBI-3004G201700	0.0527836	Zm00001d017085	0.034404	Zm00001d050961	0.0401366		0	3	13	0	-0.1875	Not_Neo																							Zm00001d047776
844	SORBI-3004G201900	#N/A	Zm00001d017089	#N/A	Zm00001d050963	#N/A		16	0	0	0	-1	Not_Neo																							Zm00001d047977
845	SORBI-3004G202000	#N/A	Zm00001d017090	#N/A	Zm00001d050964	#N/A		2	0	14	0	-0.125	Not_Neo																							Zm00001d048153
846	SORBI-3004G202100	0.0602583	Zm00001d017091	0.347747	Zm00001d050965	0.106195		0	5	11	0	-0.3125	Not_Neo																							Zm00001d048154
847	SORBI-3004G202200	0.206806	Zm00001d017092	0.0730467	Zm00001d050969	0.0604621		14	0	2	0	-0.875	Not_Neo																							Zm00001d048234
848	SORBI-3004G202500	0.0649951	Zm00001d017096	0.19512	Zm00001d050970	0.477534	Aromatic amino acid lyase	0	0	16	0	0	Not_Neo																							Zm00001d048235
849	SORBI-3004G203100	0.163964	Zm00001d017100	0.169789	Zm00001d050978	0.185817	Multicopper oxidase	6	0	10	0	-0.375	Not_Neo																							Zm00001d048236
850	SORBI-3004G203500	0.161431	Zm00001d017106	0.0639287	Zm00001d050981	0.104192		16	0	0	0	-1	Not_Neo																							Zm00001d048270
851	SORBI-3004G203700	0.123883	Zm00001d017107	0.274601	Zm00001d050988	0.0960196		16	0	0	0	-1	Not_Neo																							Zm00001d048422
852	SORBI-3004G203900	0.123049	Zm00001d017111	0.104671	Zm00001d050992	0.0878381		0	0	16	0	0	Not_Neo																							Zm00001d048424
853	SORBI-3004G205000	0.0197139	Zm00001d017120	0.0602356	Zm00001d050993	0.143212	Terpene synthase, N-terminal domain	14	0	2	0	-0.875	Not_Neo																							Zm00001d048428
854	SORBI-3004G205100	0.0488013	Zm00001d017121	0.0454293	Zm00001d051001	0.0762227		0	0	16	0	0	Not_Neo																							Zm00001d048430
855	SORBI-3004G207900	0.0103308	Zm00001d017144	0.551494	Zm00001d051014	0.251797		0	0	16	0	0	Not_Neo																							Zm00001d048431
856	SORBI-3004G208000	0.254702	Zm00001d017145	0.0815473	Zm00001d051015	0.161479		0	10	6	0	-0.625	Not_Neo																							Zm00001d048432
857	SORBI-3004G208100	0.659164	Zm00001d017146	1.09736	Zm00001d051016	0.722722		0	5	11	0	-0.3125	Not_Neo																							Zm00001d049391
858	SORBI-3004G208400	0.164375	Zm00001d017147	0.103675	Zm00001d051018	0.0582695		16	0	0	0	-1	Not_Neo																							Zm00001d049416
859	SORBI-3004G208600	0.499128	Zm00001d017151	1.00892	Zm00001d051020	0.384774		0	0	16	0	0	Not_Neo																							Zm00001d049428
860	SORBI-3004G210000	0.324928	Zm00001d017168	0.368307	Zm00001d051043	#N/A		0	0	16	0	0	Not_Neo																							Zm00001d049432
861	SORBI-3004G211200	0.223362	Zm00001d017176	0.125258	Zm00001d051047	#N/A		5	0	11	0	-0.3125	Not_Neo																							Zm00001d049457
862	SORBI-3004G211400	0.13264	Zm00001d017177	0.234697	Zm00001d051052	0.408988		0	0	16	0	0	Not_Neo																							Zm00001d049459
863	SORBI-3004G211501	0.274627	Zm00001d017178	0.785692	Zm00001d051053	0.803914		0	9	1	16	-0.9	M2																							Zm00001d049464
864	SORBI-3004G212400	0.194593	Zm00001d017187	0.168925	Zm00001d051062	0.228016		0	8	8	0	-0.5	Not_Neo																							Zm00001d049510
865	SORBI-3004G212700	0.0346058	Zm00001d017193	0.01379	Zm00001d051065	0.119139		0	6	10	0	-0.375	Not_Neo																							Zm00001d049746
866	SORBI-3004G213000	0.430053	Zm00001d017197	0.273257	Zm00001d051067	0.561132		0	0	16	0	0	Not_Neo																							Zm00001d049748
867	SORBI-3004G213300	0.211663	Zm00001d017201	0.221145	Zm00001d051069	0.164045		0	16	0	4	-1	Not_Neo																							Zm00001d049750
868	SORBI-3004G214000	0.0879887	Zm00001d017204	0.0719675	Zm00001d051080	0.125254	F-box domain	3	5	8	3	0.203125	Not_Neo																							Zm00001d049753
869	SORBI-3004G214100	0.089456	Zm00001d017205	0.108719	Zm00001d051081	0.129202		4	0	12	0	-0.25	Not_Neo																							Zm00001d049756
870	SORBI-3004G214200	0.992655	Zm00001d017206	0.773028	Zm00001d051082	0.383653		1	0	15	0	-0.0625	Not_Neo																							Zm00001d049760
871	SORBI-3004G216400	#N/A	Zm00001d017239	#N/A	Zm00001d051112	#N/A		1	0	15	0	-0.0625	Not_Neo																							Zm00001d049805
872	SORBI-3004G215700	#N/A	Zm00001d017239	#N/A	Zm00001d051112	#N/A		1	0	15	0	-0.0625	Not_Neo																							Zm00001d049806
873	SORBI-3004G216700	0.250626	Zm00001d017241	0.355118	Zm00001d051114	0.232061		2	1	13	1	0.015625	Not_Neo																							Zm00001d049807
874	SORBI-3004G216800	0.16893	Zm00001d017242	9.95237e-05	Zm00001d051116	#N/A		0	0	16	0	0	Not_Neo																							Zm00001d049809
875	SORBI-3004G217450	0.277036	Zm00001d017247	0.155624	Zm00001d051119	0.414178		12	0	4	0	-0.75	Not_Neo																							Zm00001d049813
876	SORBI-3004G217700	0.0231512	Zm00001d017248	0.220903	Zm00001d051121	0.214424		0	16	0	0	-1	Not_Neo																							Zm00001d049815
877	SORBI-3004G218500	0.207847	Zm00001d017256	0.158652	Zm00001d051128	0.109551		2	10	2	2	0.244898	Not_Neo																							Zm00001d049817
878	SORBI-3004G218600	0.000106468	Zm00001d017258	0.439253	Zm00001d051129	#N/A		0	5	11	0	-0.3125	Not_Neo																							Zm00001d049821
879	SORBI-3004G219000	0.426148	Zm00001d017261	0.267544	Zm00001d051135	0.194491		0	0	16	0	0	Not_Neo																							Zm00001d049822
880	SORBI-3004G219800	0.15189	Zm00001d017268	0.114485	Zm00001d051149	0.201193		1	10	5	5	0.015625	Not_Neo																							Zm00001d049865
881	SORBI-3004G219900	0.130524	Zm00001d017270	0.115973	Zm00001d051156	0.128845		0	9	7	0	-0.5625	Not_Neo																							Zm00001d049873
882	SORBI-3004G220000	0.13744	Zm00001d017271	0.0603283	Zm00001d051157	0.1504		16	0	0	0	-1	Not_Neo																							Zm00001d049880
883	SORBI-3004G220300	0.0214345	Zm00001d017274	0.0310141	Zm00001d051161	0.0195852		16	0	0	0	-1	Not_Neo																							Zm00001d049881
884	SORBI-3004G220400	0.0264201	Zm00001d017275	0.028621	Zm00001d051163	0.0575656		11	0	5	0	-0.6875	Not_Neo																							Zm00001d049888
885	SORBI-3004G220600	0.019165	Zm00001d017279	0.030134	Zm00001d051166	0.0467267		15	0	1	4	-0.9375	Not_Neo																							Zm00001d049889
886	SORBI-3004G220700	0.022998	Zm00001d017279	0.030134	Zm00001d051166	0.0467267		0	0	1	16	0	M1																							Zm00001d049894
887	SORBI-3004G221400	0.2141	Zm00001d017284	#N/A	Zm00001d051172	#N/A		4	0	12	0	-0.25	Not_Neo																							Zm00001d049902
888	SORBI-3004G222000	0.0939423	Zm00001d017288	#N/A	Zm00001d051174	#N/A		1	8	7	0	0.015625	Not_Neo																							Zm00001d049903
889	SORBI-3004G222600	0.367721	Zm00001d017296	0.308835	Zm00001d051178	0.34708		0	16	0	0	-1	Not_Neo																							Zm00001d050017
890	SORBI-3004G222800	0.609693	Zm00001d017298	0.330458	Zm00001d051180	0.375257		6	1	9	0	0.015625	Not_Neo																							Zm00001d050018
891	SORBI-3004G223000	0.00376219	Zm00001d017303	0.341621	Zm00001d051183	0.155868		0	7	9	0	-0.4375	Not_Neo																							Zm00001d050019
892	SORBI-3004G224000	0.0894976	Zm00001d017323	0.213448	Zm00001d051193	0.0902712		0	16	0	5	-1	Not_Neo																							Zm00001d050020
893	SORBI-3004G224500	0.117234	Zm00001d017330	0.0269052	Zm00001d051203	0.0604077	Gelsolin repeat	0	16	0	0	-1	Not_Neo																							Zm00001d050021
894	SORBI-3004G224700	0.0383553	Zm00001d017333	0.110669	Zm00001d051206	0.2625		0	0	1	16	0	M1_M2																							Zm00001d050389
895	SORBI-3004G224800	0.000108328	Zm00001d017335	0.0349331	Zm00001d051207	0.199726		16	0	0	0	-1	Not_Neo																							Zm00001d050393
896	SORBI-3004G224900	9.88973e-05	Zm00001d017336	0.000100471	Zm00001d051211	9.84987e-05		0	16	0	0	-1	Not_Neo																							Zm00001d050394
897	SORBI-3004G225000	0.220157	Zm00001d017352	0.389453	Zm00001d051214	0.150284		16	0	0	0	-1	Not_Neo																							Zm00001d050544
898	SORBI-3004G225100	0.293914	Zm00001d017352	0.389453	Zm00001d051214	0.150284		16	0	0	0	-1	Not_Neo																							Zm00001d050550
899	SORBI-3004G225200	0.144975	Zm00001d017352	0.389453	Zm00001d051214	0.150284		16	0	0	0	-1	Not_Neo																							Zm00001d050551
900	SORBI-3004G225800	0.0652097	Zm00001d017353	0.0470771	Zm00001d051223	0.155947		0	10	3	9	-0.769231	M2																							Zm00001d050552
901	SORBI-3004G225900	0.153388	Zm00001d017353	0.0470771	Zm00001d051225	0.259183		11	1	4	0	0.015625	Not_Neo																							Zm00001d050557
902	SORBI-3004G226700	#N/A	Zm00001d017360	#N/A	Zm00001d051232	#N/A		13	0	3	0	-0.8125	Not_Neo																							Zm00001d050558
903	SORBI-3004G226900	0.758335	Zm00001d017361	1.2072	Zm00001d051234	0.603537		1	2	13	2	0.015625	Not_Neo																							Zm00001d050563
904	SORBI-3004G227400	0.242468	Zm00001d017366	0.284609	Zm00001d051239	0.370934		0	13	3	14	-0.8125	Not_Neo																							Zm00001d050565
905	SORBI-3004G227500	0.307447	Zm00001d017371	0.296866	Zm00001d051241	0.227187		1	0	15	0	-0.0625	Not_Neo																							Zm00001d050714
906	SORBI-3004G227600	0.113357	Zm00001d017373	0.577108	Zm00001d051242	0.343286		7	0	9	0	-0.4375	Not_Neo																							Zm00001d050715
907	SORBI-3004G228200	0.528427	Zm00001d017379	0.0295579	Zm00001d051250	0.298367	Protein phosphatase inhibitor 2 (IPP-2)	0	0	16	0	0	Not_Neo																							Zm00001d050716
908	SORBI-3004G304400	0.101858	Zm00001d017381	0.175721	Zm00001d051251	0.130317		7	0	5	16	-0.583333	M1																							Zm00001d050723
909	SORBI-3004G303600	0.125382	Zm00001d017383	0.227863	Zm00001d051267	0.261936		15	0	0	2	-1	M1																							Zm00001d050735
910	SORBI-3004G302800	0.156107	Zm00001d017390	0.215821	Zm00001d051288	0.370269		2	2	4	16	0.25	M1_M2																							Zm00001d050737
911	SORBI-3004G302600	#N/A	Zm00001d017392	#N/A	Zm00001d051291	#N/A		0	3	13	0	-0.1875	Not_Neo																							Zm00001d050741
912	SORBI-3004G302200	0.338253	Zm00001d017397	0.451262	Zm00001d051302	#N/A		3	4	9	0	0.171875	Not_Neo																							Zm00001d050747
913	SORBI-3004G301700	0.126494	Zm00001d017401	0.0604663	Zm00001d051306	#N/A		0	0	16	0	0	Not_Neo																							Zm00001d050748
914	SORBI-3004G301400	0.0932628	Zm00001d017403	0.403426	Zm00001d051307	#N/A		0	16	0	0	-1	Not_Neo																							Zm00001d050753
915	SORBI-3004G301000	0.0842744	Zm00001d017412	0.218387	Zm00001d051309	#N/A		1	9	6	0	0.015625	Not_Neo																							Zm00001d050768
916	SORBI-3004G300600	0.10803	Zm00001d017419	0.164663	Zm00001d051314	#N/A		10	0	6	0	-0.625	Not_Neo																							Zm00001d051067
917	SORBI-3004G300500	0.455539	Zm00001d017420	0.304612	Zm00001d051316	#N/A		1	5	10	5	0.015625	Not_Neo																							Zm00001d051069
918	SORBI-3004G300000	0.212858	Zm00001d017424	0.207336	Zm00001d051321	0.20363		1	2	13	0	0.015625	Not_Neo																							Zm00001d051075
919	SORBI-3004G298200	0.145974	Zm00001d017448	0.149748	Zm00001d051329	0.260907		13	0	2	9	-0.866667	M1																							Zm00001d051080
920	SORBI-3004G297900	0.515595	Zm00001d017455	0.242663	Zm00001d051333	0.205116		1	4	6	13	0.0330579	M1_M2																							Zm00001d051118
921	SORBI-3004G297700	0.000104126	Zm00001d017456	9.19731e-05	Zm00001d051336	0.0357972		0	0	16	0	0	Not_Neo																							Zm00001d051119
922	SORBI-3004G297300	0.232382	Zm00001d017460	0.733817	Zm00001d051337	0.403225	Serine aminopeptidase, S33	0	16	0	0	-1	Not_Neo																							Zm00001d051238
923	SORBI-3004G297200	0.0796116	Zm00001d017461	0.172126	Zm00001d051338	0.174695		11	0	4	8	-0.733333	M1																							Zm00001d051239
924	SORBI-3004G296900	0.162587	Zm00001d017466	0.414293	Zm00001d051340	0.161916	B3 DNA binding domain	1	1	5	16	0.0816327	M1_M2																							Zm00001d051418
925	SORBI-3004G296200	0.0384923	Zm00001d017473	0.142099	Zm00001d051343	0.127826		2	1	13	0	0.015625	Not_Neo																							Zm00001d051527
926	SORBI-3004G296100	0.265478	Zm00001d017474	0.374779	Zm00001d051344	0.457625		13	1	1	7	0.0177778	Not_Neo																							Zm00001d051550
927	SORBI-3004G295700	0.355982	Zm00001d017477	0.146884	Zm00001d051355	0.00464452		1	0	0	16	-1	M1_M2																							Zm00001d051552
928	SORBI-3004G295600	0.186538	Zm00001d017478	0.28468	Zm00001d051350	0.315186	B3 DNA binding domain	6	0	7	14	-0.461538	M2																							Zm00001d051553
929	SORBI-3004G295500	0.259753	Zm00001d017480	0.161467	Zm00001d051355	0.00464452		1	5	2	8	0.0625	Not_Neo																							Zm00001d051554
930	SORBI-3004G295300	0.139386	Zm00001d017482	0.434856	Zm00001d051360	0.66355	B3 DNA binding domain	16	0	0	2	-1	Not_Neo																							Zm00001d051556
931	SORBI-3004G295100	0.0219716	Zm00001d017485	0.0696526	Zm00001d051362	0.0395441		1	12	3	0	0.015625	Not_Neo																							Zm00001d051561
932	SORBI-3004G295000	0.154305	Zm00001d017486	993.829	Zm00001d051365	0.129427		0	8	2	15	-0.8	M1_M2																							Zm00001d051562
933	SORBI-3004G294900	1020.71	Zm00001d017491	0.00838381	Zm00001d051366	0.168841		0	5	11	0	-0.3125	Not_Neo																							Zm00001d051563
934	SORBI-3004G293700	0.29116	Zm00001d017501	0.159155	Zm00001d051374	0.0902215		16	0	0	0	-1	Not_Neo																							Zm00001d051565
935	SORBI-3004G293000	0.386552	Zm00001d017505	0.284908	Zm00001d051383	0.537992		16	0	0	7	-1	Not_Neo																							Zm00001d051620
936	SORBI-3004G292001	0.24536	Zm00001d017508	0.139511	Zm00001d051384	0.0307665		6	0	6	11	-0.5	M1																							Zm00001d051626
937	SORBI-3004G292600	0.180127	Zm00001d017508	0.139511	Zm00001d051384	0.0307665		5	0	6	13	-0.454545	M1																							Zm00001d051627
938	SORBI-3004G292700	1.67758	Zm00001d017508	0.139511	Zm00001d051384	0.0307665		10	0	6	2	-0.625	Not_Neo																							Zm00001d051628
939	SORBI-3004G292800	0.180127	Zm00001d017508	0.139511	Zm00001d051384	0.0307665		0	0	6	16	0	M1																							Zm00001d051629
940	SORBI-3004G292900	0.090944	Zm00001d017508	0.139511	Zm00001d051384	0.0307665		10	0	6	0	-0.625	Not_Neo																							Zm00001d051632
941	SORBI-3004G290800	0.14779	Zm00001d017513	0.661002	Zm00001d051387	0.305864		1	9	3	14	0.0236686	M2																							Zm00001d051637
942	SORBI-3004G291000	0.585386	Zm00001d017513	0.661002	Zm00001d051387	0.305864		1	12	3	1	0.015625	Not_Neo																							Zm00001d051685
943	SORBI-3004G290500	0.0583242	Zm00001d017516	1.03904	Zm00001d051388	0.0444148		0	3	1	16	-0.75	M1_M2																							Zm00001d051785
944	SORBI-3004G289800	0.725842	Zm00001d017523	0.824925	Zm00001d051394	0.941366		16	0	0	0	-1	Not_Neo																							Zm00001d051815
945	SORBI-3004G288600	0.162703	Zm00001d017525	0.299339	Zm00001d051404	0.1472		0	1	15	0	-0.0625	Not_Neo																							Zm00001d051823
946	SORBI-3004G288700	8.7858e-05	Zm00001d017526	0.061741	Zm00001d051403	0.0146932		14	0	2	0	-0.875	Not_Neo																							Zm00001d051824
947	SORBI-3004G287800	0.104276	Zm00001d017534	0.303767	Zm00001d051410	0.705673	Semialdehyde dehydrogenase, dimerisation domain	2	3	11	0	0.078125	Not_Neo																							Zm00001d051829
948	SORBI-3004G287700	0.22867	Zm00001d017535	0.204775	Zm00001d051411	0.138482		13	0	3	0	-0.8125	Not_Neo																							Zm00001d051830
949	SORBI-3004G287400	0.139204	Zm00001d017539	0.151064	Zm00001d051415	0.283628		16	0	0	0	-1	Not_Neo																							Zm00001d051832
950	SORBI-3004G287300	0.0663187	Zm00001d017540	0.0823997	Zm00001d051416	0.0799867		9	1	6	14	0.015625	Not_Neo																							Zm00001d051900
951	SORBI-3004G286600	0.086102	Zm00001d017547	0.241331	Zm00001d051420	0.145287		0	4	12	0	-0.25	Not_Neo																							Zm00001d051901
952	SORBI-3004G286500	0.845424	Zm00001d017550	0.328296	Zm00001d051421	0.261221		0	12	4	0	-0.75	Not_Neo																							Zm00001d051902
953	SORBI-3004G285900	0.185688	Zm00001d017555	0.124603	Zm00001d051427	0.0833438		0	0	16	0	0	Not_Neo																							Zm00001d051959
954	SORBI-3004G285700	0.325159	Zm00001d017558	0.131179	Zm00001d051429	0.0830196		13	0	3	5	-0.8125	Not_Neo																							Zm00001d051966
955	SORBI-3004G284800	0.295448	Zm00001d017568	0.2341	Zm00001d051431	0.295205		4	0	12	0	-0.25	Not_Neo																							Zm00001d052093
956	SORBI-3004G284400	0.076113	Zm00001d017575	0.110038	Zm00001d051439	0.273723		0	7	9	0	-0.4375	Not_Neo																							Zm00001d052098
957	SORBI-3004G283800	0.035248	Zm00001d017583	0.086586	Zm00001d051442	0.158249		0	16	0	0	-1	Not_Neo																							Zm00001d052146
958	SORBI-3004G283300	0.379023	Zm00001d017591	0.315643	Zm00001d051451	0.355817		10	1	3	14	0.0204082	M1																							Zm00001d052147
959	SORBI-3004G282100	9.14027e-05	Zm00001d017607	0.32181	Zm00001d051457	0.162286		0	16	0	1	-1	Not_Neo																							Zm00001d052194
960	SORBI-3004G281900	0.480452	Zm00001d017608	9.68469e-05	Zm00001d051458	0.0868189		4	0	12	6	-0.25	Not_Neo																							Zm00001d052198
961	SORBI-3004G281400	0.207053	Zm00001d017612	0.312172	Zm00001d051460	0.277445	Condensin II non structural maintenance of chromosomes subunit	2	8	5	12	0.177778	M1																							Zm00001d052200
962	SORBI-3004G280900	0.308893	Zm00001d017615	0.264714	Zm00001d051468	0.192271		1	11	4	5	0.015625	Not_Neo																							Zm00001d052223
963	SORBI-3004G279700	0.140084	Zm00001d017622	0.219485	Zm00001d051475	0.203842		16	0	0	0	-1	Not_Neo																							Zm00001d052224
964	SORBI-3004G279800	972.182	Zm00001d017625	0.672182	Zm00001d051474	0.330707		1	7	8	1	0.015625	Not_Neo																							Zm00001d052225
965	SORBI-3004G279400	0.421971	Zm00001d017641	0.541484	Zm00001d051479	0.31344		0	3	3	16	-0.5	M1_M2																							Zm00001d052227
966	SORBI-3004G279300	0.334222	Zm00001d017642	0.572855	Zm00001d051480	0.603787	Lateral organ boundaries (LOB) domain	7	3	4	11	0.346939	M1																							Zm00001d052229
967	SORBI-3004G279000	0.0597763	Zm00001d017645	0.0860412	Zm00001d051501	0.563995		2	0	1	16	-0.666667	M1																							Zm00001d052230
968	SORBI-3004G278400	0.594106	Zm00001d017646	0.506797	Zm00001d051496	0.0201778		0	11	5	0	-0.6875	Not_Neo																							Zm00001d052721
969	SORBI-3004G278300	0.0668878	Zm00001d017647	0.131374	Zm00001d051495	0.126169		11	1	0	13	0.0277778	M1																							Zm00001d052723
970	SORBI-3004G278100	0.211784	Zm00001d017648	0.345504	Zm00001d051492	0.00618783		1	1	4	16	0.111111	M1_M2																							Zm00001d052838
971	SORBI-3004G278200	0.312489	Zm00001d017648	0.345504	Zm00001d051492	0.00618783		5	5	4	0	0.510204	Not_Neo																							Zm00001d053382
972	SORBI-3004G278000	0.105087	Zm00001d017649	0.282394	Zm00001d051484	#N/A		16	0	0	0	-1	Not_Neo																							Zm00001d053599
973	SORBI-3004G276700	0.12608	Zm00001d017657	0.284254	Zm00001d051505	0.227804		14	0	2	6	-0.875	Not_Neo																							Zm00001d000458
974	SORBI-3004G276400	0.197042	Zm00001d017660	0.175955	Zm00001d051507	0.421287		0	6	10	0	-0.375	Not_Neo																							Zm00001d002192
975	SORBI-3004G275500	0.127307	Zm00001d017677	0.3854	Zm00001d051509	0.302788		11	1	4	1	0.015625	Not_Neo																							Zm00001d002194
976	SORBI-3004G275200	0.0317583	Zm00001d017682	0.151556	Zm00001d051511	0.239128		1	6	9	0	0.015625	Not_Neo																							Zm00001d002241
977	SORBI-3004G274900	0.617947	Zm00001d017686	0.473956	Zm00001d051513	0.389934		0	12	4	0	-0.75	Not_Neo																							Zm00001d002243
978	SORBI-3004G273400	0.133219	Zm00001d017698	0.11709	Zm00001d051525	0.0747871		1	9	6	4	0.015625	Not_Neo																							Zm00001d002244
979	SORBI-3004G273500	0.127028	Zm00001d017698	0.11709	Zm00001d051525	0.0747871		1	8	6	15	0.0177778	M2																							Zm00001d002625
980	SORBI-3004G273200	0.0873321	Zm00001d017699	0.104278	Zm00001d051526	0.159609		16	0	0	0	-1	Not_Neo																							Zm00001d002639
981	SORBI-3004G273000	0.466588	Zm00001d017702	0.270516	Zm00001d051527	0.261164		0	2	1	16	-0.666667	M2																							Zm00001d002650
982	SORBI-3004G272900	0.324364	Zm00001d017703	0.680189	Zm00001d051528	0.845794		0	12	4	2	-0.75	Not_Neo																							Zm00001d002673
983	SORBI-3004G272400	0.128435	Zm00001d017707	0.287686	Zm00001d051535	0.104454		16	0	0	0	-1	Not_Neo																							Zm00001d002675
984	SORBI-3004G271800	0.35728	Zm00001d017712	0.325146	Zm00001d051550	0.37571	PHD-zinc-finger like domain	2	3	11	4	0.078125	Not_Neo																							Zm00001d002682
985	SORBI-3004G271700	8.98372e-05	Zm00001d017717	0.079641	Zm00001d051546	0.251386		14	0	1	12	-0.933333	M1																							Zm00001d002690
986	SORBI-3004G271500	0.385705	Zm00001d017718	0.675931	Zm00001d051544	0.612446		0	15	1	0	-0.9375	Not_Neo																							Zm00001d002705
987	SORBI-3004G271400	0.151559	Zm00001d017719	0.0574713	Zm00001d051543	0.00959734		0	0	16	0	0	Not_Neo																							Zm00001d002714
988	SORBI-3004G271300	0.349629	Zm00001d017720	0.146332	Zm00001d051542	0.322805		0	16	0	0	-1	Not_Neo																							Zm00001d002734
989	SORBI-3004G269700	0.179018	Zm00001d017748	0.153354	Zm00001d051552	0.0947311		0	16	0	0	-1	Not_Neo																							Zm00001d002797
990	SORBI-3004G269100	0.0757127	Zm00001d017755	0.112233	Zm00001d051553	0.191138		16	0	0	0	-1	Not_Neo																							Zm00001d002828
991	SORBI-3004G268700	0.0509455	Zm00001d017762	0.0934704	Zm00001d051554	0.122754		10	0	6	0	-0.625	Not_Neo																							Zm00001d002969
992	SORBI-3004G268300	1.31461	Zm00001d017767	0.485803	Zm00001d051561	0.354309		10	1	5	3	0.015625	Not_Neo																							Zm00001d002971
993	SORBI-3004G268200	0.52714	Zm00001d017768	0.293138	Zm00001d051562	0.664308		16	0	0	0	-1	Not_Neo																							Zm00001d003109
994	SORBI-3004G268100	0.172089	Zm00001d017769	0.291524	Zm00001d051563	0.294734		15	0	1	0	-0.9375	Not_Neo																							Zm00001d003124
995	SORBI-3004G268000	0.0889331	Zm00001d017770	0.138837	Zm00001d051564	#N/A	PPR repeat	8	1	7	0	0.015625	Not_Neo																							Zm00001d003125
996	SORBI-3004G267600	0.0874007	Zm00001d017773	0.0583746	Zm00001d051568	0.0988437		0	1	15	0	-0.0625	Not_Neo																							Zm00001d003220
997	SORBI-3004G267400	0.129765	Zm00001d017778	0.118482	Zm00001d051569	0.361589		1	1	8	15	0.04	M1_M2																							Zm00001d003223
998	SORBI-3004G266900	0.201989	Zm00001d017783	0.185183	Zm00001d051572	0.173311		5	0	11	0	-0.3125	Not_Neo																							Zm00001d003224
999	SORBI-3004G266800	0.237921	Zm00001d017784	0.410984	Zm00001d051573	0.366714		1	1	0	16	1	M1_M2																							Zm00001d003395
1000	SORBI-3004G266200	0.0523443	Zm00001d017788	0.0871162	Zm00001d051577	0.151215		2	1	11	6	0.0204082	M2																							Zm00001d003534
1001	SORBI-3004G266100	0.292338	Zm00001d017789	0.3859	Zm00001d051585	0.219106		10	2	3	15	0.213333	Not_Neo																							Zm00001d003540
1002	SORBI-3004G265900	0.130454	Zm00001d017790	0.255967	Zm00001d051586	0.310424		0	5	11	0	-0.3125	Not_Neo																							Zm00001d003600
1003	SORBI-3004G265600	0.0834008	Zm00001d017793	0.36494	Zm00001d051589	0.0764092		1	4	11	0	0.015625	Not_Neo																							Zm00001d003807
1004	SORBI-3004G265500	0.275861	Zm00001d017798	0.428447	Zm00001d051590	0.356323		16	0	0	0	-1	Not_Neo																							Zm00001d003877
1005	SORBI-3004G265132	0.0716615	Zm00001d017800	0.381555	Zm00001d051592	0.361931	Protein tyrosine kinase	2	0	3	16	-0.4	M1_M2																							Zm00001d004015
1006	SORBI-3004G263700	0.247976	Zm00001d017807	0.26651	Zm00001d051606	0.224341		0	16	0	1	-1	Not_Neo																							Zm00001d004020
1007	SORBI-3004G263500	0.906202	Zm00001d017809	0.159655	Zm00001d051607	0.52586		16	0	0	0	-1	Not_Neo																							Zm00001d004021
1008	SORBI-3004G262500	0.147791	Zm00001d017821	0.337766	Zm00001d051615	0.169932		0	5	11	0	-0.3125	Not_Neo																							Zm00001d004022
1009	SORBI-3004G262200	0.0365184	Zm00001d017825	0.0579757	Zm00001d051620	0.118602	Lateral organ boundaries (LOB) domain	3	1	12	0	0.015625	Not_Neo																							Zm00001d004023
1010	SORBI-3004G262000	0.0379868	Zm00001d017829	0.561264	Zm00001d051627	0.481998		0	9	7	0	-0.5625	Not_Neo																							Zm00001d004025
1011	SORBI-3004G261800	0.0526439	Zm00001d017830	0.0825888	Zm00001d051629	0.0724521	Chaperonin 10 Kd subunit	0	0	16	0	0	Not_Neo																							Zm00001d004036
1012	SORBI-3004G261700	0.133422	Zm00001d017831	0.636141	Zm00001d051632	0.396117		0	12	3	5	-0.8	M1																							Zm00001d004048
1013	SORBI-3004G261600	0.169082	Zm00001d017832	0.227034	Zm00001d051633	0.44853		7	1	8	0	0.015625	Not_Neo																							Zm00001d004051
1014	SORBI-3004G261500	0.273574	Zm00001d017833	0.0834359	Zm00001d051634	0.107371		3	0	13	0	-0.1875	Not_Neo																							Zm00001d004055
1015	SORBI-3004G260600	1008	Zm00001d017840	0.0036106	Zm00001d051636	0.0935727		0	16	0	11	-1	Not_Neo																							Zm00001d004099
1016	SORBI-3004G260800	0.00139697	Zm00001d017840	0.0036106	Zm00001d051636	0.0935727		0	16	0	0	-1	Not_Neo																							Zm00001d004102
1017	SORBI-3004G260400	0.0573175	Zm00001d017845	0.240621	Zm00001d051642	0.0197856		16	0	0	0	-1	Not_Neo																							Zm00001d004133
1018	SORBI-3004G260100	0.158011	Zm00001d017848	0.172794	Zm00001d051644	0.363187		0	0	16	0	0	Not_Neo																							Zm00001d004165
1019	SORBI-3004G259700	0.020252	Zm00001d017850	0.0187702	Zm00001d051662	0.107861	Protein kinase domain	16	0	0	0	-1	Not_Neo																							Zm00001d004187
1020	SORBI-3004G259432	#N/A	Zm00001d017851	#N/A	Zm00001d051658	#N/A		5	7	4	0	0.515625	Not_Neo																							Zm00001d004190
1021	SORBI-3004G259366	1.05622	Zm00001d017852	0.93932	Zm00001d051653	0.604		16	0	0	4	-1	Not_Neo																							Zm00001d004193
1022	SORBI-3004G259200	0.0829121	Zm00001d017857	0.0327833	Zm00001d051685	0.0364372		3	0	13	0	-0.1875	Not_Neo																							Zm00001d004305
1023	SORBI-3004G259101	0.229687	Zm00001d017859	0.23161	Zm00001d051687	0.46297		13	0	3	0	-0.8125	Not_Neo																							Zm00001d004465
1024	SORBI-3004G259000	0.286906	Zm00001d017860	0.123361	Zm00001d051688	0.132266	GDP-fucose protein O-fucosyltransferase	2	0	14	0	-0.125	Not_Neo																							Zm00001d004691
1025	SORBI-3004G258800	0.328744	Zm00001d017861	0.298349	Zm00001d051689	0.177552		5	0	7	16	-0.416667	M1																							Zm00001d004818
1026	SORBI-3004G258700	0.627881	Zm00001d017862	0.605988	Zm00001d051690	0.629577		0	10	6	2	-0.625	Not_Neo																							Zm00001d005019
1027	SORBI-3004G258400	0.314518	Zm00001d017864	0.0952589	Zm00001d051692	0.186442		3	0	1	16	-0.75	M1_M2																							Zm00001d005023
1028	SORBI-3004G257400	0.248286	Zm00001d017872	0.118503	Zm00001d051671	0.0812321		15	0	1	0	-0.9375	Not_Neo																							Zm00001d005026
1029	SORBI-3004G257300	0.419264	Zm00001d017874	0.328853	Zm00001d051672	#N/A		0	16	0	0	-1	Not_Neo																							Zm00001d005027
1030	SORBI-3004G257200	0.123608	Zm00001d017876	0.218924	Zm00001d051674	0.299409		9	0	7	0	-0.5625	Not_Neo																							Zm00001d005028
1031	SORBI-3004G257000	0.0366909	Zm00001d017877	0.0663405	Zm00001d051675	0.0635446		3	1	12	0	0.015625	Not_Neo																							Zm00001d005349
1032	SORBI-3004G257100	0.150999	Zm00001d017877	0.0663405	Zm00001d051675	0.0635446		3	1	12	0	0.015625	Not_Neo																							Zm00001d005350
1033	SORBI-3004G256700	0.188449	Zm00001d017881	0.0818358	Zm00001d051676	0.143245		16	0	0	0	-1	Not_Neo																							Zm00001d005359
1034	SORBI-3004G255400	0.697674	Zm00001d017882	0.0545002	Zm00001d051677	0.178851		0	0	13	16	0	M1_M2																							Zm00001d005970
1035	SORBI-3004G256600	0.071455	Zm00001d017882	0.0545002	Zm00001d051677	0.178851		2	1	13	0	0.015625	Not_Neo																							Zm00001d005980
1036	SORBI-3004G256500	0.203799	Zm00001d017883	0.281373	Zm00001d051678	0.399511		7	0	9	0	-0.4375	Not_Neo																							Zm00001d005981
1037	SORBI-3004G256200	0.16967	Zm00001d017885	0.178274	Zm00001d051684	0.525987		14	0	2	3	-0.875	Not_Neo																							Zm00001d006118
1038	SORBI-3004G256000	0.210285	Zm00001d017887	0.00991892	Zm00001d051652	0.253783		8	0	8	0	-0.5	Not_Neo																							Zm00001d006124
1039	SORBI-3004G254700	0.589039	Zm00001d017896	0.126623	Zm00001d051696	0.339359		2	0	1	16	-0.666667	M1_M2																							Zm00001d006209
1040	SORBI-3004G255100	0.788891	Zm00001d017896	0.126623	Zm00001d051670	#N/A		0	4	1	16	-0.8	M2																							Zm00001d006227
1041	SORBI-3004G254000	0.128574	Zm00001d017900	0.162502	Zm00001d051700	0.225301		1	3	1	16	0.16	M1_M2																							Zm00001d006231
1042	SORBI-3004G253900	0.241612	Zm00001d017905	0.284095	Zm00001d051702	0.223119		0	0	16	0	0	Not_Neo																							Zm00001d006232
1043	SORBI-3004G252200	0.171013	Zm00001d017913	0.0866373	Zm00001d051741	#N/A		14	0	2	1	-0.875	Not_Neo																							Zm00001d006235
1044	SORBI-3004G252100	0.0804461	Zm00001d017914	#N/A	Zm00001d051741	#N/A		16	0	0	0	-1	Not_Neo																							Zm00001d006307
1045	SORBI-3004G251300	0.0903524	Zm00001d017920	#N/A	Zm00001d051749	#N/A	Pyroglutamyl peptidase	16	0	0	0	-1	Not_Neo																							Zm00001d006319
1046	SORBI-3004G250700	0.297346	Zm00001d017925	0.169884	Zm00001d051756	0.205723		16	0	0	0	-1	Not_Neo																							Zm00001d006320
1047	SORBI-3004G250600	0.0550758	Zm00001d017926	0.135274	Zm00001d051759	0.142629		1	1	14	0	0.015625	Not_Neo																							Zm00001d006321
1048	SORBI-3004G250500	0.0358258	Zm00001d017927	0.39517	Zm00001d051760	0.183179		4	0	12	0	-0.25	Not_Neo																							Zm00001d006467
1049	SORBI-3004G249400	0.0400339	Zm00001d017941	#N/A	Zm00001d051787	#N/A		0	0	2	16	0	M2																							Zm00001d006605
1050	SORBI-3004G248300	0.0903474	Zm00001d017947	0.0691436	Zm00001d051789	0.212203		15	0	0	11	-1	M1																							Zm00001d006606
1051	SORBI-3004G247600	9.80977e-05	Zm00001d017951	0.0268736	Zm00001d051799	0.147473		16	0	0	0	-1	Not_Neo																							Zm00001d006704
1052	SORBI-3004G247400	0.709496	Zm00001d017953	0.209996	Zm00001d051800	0.185748	Coatomer (COPI) alpha subunit C-terminus	7	1	8	0	0.015625	Not_Neo																							Zm00001d006839
1053	SORBI-3004G247200	9.83794e-05	Zm00001d017956	0.0188639	Zm00001d051803	0.0369183		3	0	13	0	-0.1875	Not_Neo																							Zm00001d006841
1054	SORBI-3004G247000	0.0772539	Zm00001d017958	0.0172711	Zm00001d051804	0.0379802		10	0	6	0	-0.625	Not_Neo																							Zm00001d007047
1055	SORBI-3004G246900	0.0397258	Zm00001d017959	0.142352	Zm00001d051806	0.124131		12	0	4	0	-0.75	Not_Neo																							Zm00001d007065
1056	SORBI-3004G246700	0.155879	Zm00001d017960	0.265597	Zm00001d051808	0.69446	Peroxidase	16	0	0	0	-1	Not_Neo																							Zm00001d007190
1057	SORBI-3004G245800	1.18306	Zm00001d017969	0.1928	Zm00001d051810	0.671373	Gibberellin regulated protein	11	0	0	10	-1	M1																							Zm00001d007200
1058	SORBI-3004G245000	0.364456	Zm00001d017977	0.20567	Zm00001d051812	0.21108		15	0	1	0	-0.9375	Not_Neo																							Zm00001d007201
1059	SORBI-3004G244600	0.0819947	Zm00001d017978	0.0937519	Zm00001d051814	0.147635		16	0	0	0	-1	Not_Neo																							Zm00001d007202
1060	SORBI-3004G244100	0.105312	Zm00001d017984	0.0819715	Zm00001d052292	0.067857		13	0	0	12	-1	M1																							Zm00001d007206
1061	SORBI-3004G244000	0.0395147	Zm00001d017985	0.0614323	Zm00001d052289	0.108647		16	0	0	0	-1	Not_Neo																							Zm00001d007285
1062	SORBI-3004G243900	0.508697	Zm00001d017986	0.348313	Zm00001d052288	0.273621		1	15	0	0	0.015625	Not_Neo																							Zm00001d007761
1063	SORBI-3004G242300	0.504827	Zm00001d017998	0.126339	Zm00001d052277	0.12621		8	0	8	0	-0.5	Not_Neo																							Zm00001d007762
1064	SORBI-3004G242000	0.208915	Zm00001d018004	0.215362	Zm00001d052273	0.101977		15	0	1	0	-0.9375	Not_Neo																							Zm00001d008173
1065	SORBI-3004G242100	0.120658	Zm00001d018004	0.215362	Zm00001d052276	#N/A		10	0	6	0	-0.625	Not_Neo																							Zm00001d008174
1066	SORBI-3004G241900	0.0603035	Zm00001d018005	0.0792367	Zm00001d052271	0.368908		14	0	2	0	-0.875	Not_Neo																							Zm00001d008176
1067	SORBI-3004G240900	0.027288	Zm00001d018024	0.053356	Zm00001d052269	0.176939		16	0	0	0	-1	Not_Neo																							Zm00001d008369
1068	SORBI-3004G239500	0.0559887	Zm00001d018028	0.0641748	Zm00001d052268	0.310301		3	10	2	7	0.408889	Not_Neo																							Zm00001d008370
1069	SORBI-3004G238801	0.0436173	Zm00001d018031	0.051014	Zm00001d052264	#N/A		0	4	12	0	-0.25	Not_Neo																							Zm00001d008553
1070	SORBI-3004G238600	0.249844	Zm00001d018033	0.326681	Zm00001d052263	#N/A		4	3	8	13	0.195556	M2																							Zm00001d008594
1071	SORBI-3004G238100	0.0658538	Zm00001d018037	0.0592822	Zm00001d052261	#N/A		4	3	7	9	0.22449	M1																							Zm00001d008762
1072	SORBI-3004G237700	0.222161	Zm00001d018040	0.405172	Zm00001d052259	#N/A	Cytochrome P450	0	0	16	0	0	Not_Neo																							Zm00001d008795
1073	SORBI-3004G237600	0.327806	Zm00001d018041	0.0812154	Zm00001d052258	#N/A		7	1	8	1	0.015625	Not_Neo																							Zm00001d008800
1074	SORBI-3004G237300	0.0556487	Zm00001d018045	0.147242	Zm00001d052256	#N/A		4	6	2	4	0.611111	Not_Neo																							Zm00001d008881
1075	SORBI-3004G237000	#DIV/0!	Zm00001d018056	0.0185359	Zm00001d052254	0.0810427		14	0	2	0	-0.875	Not_Neo																							Zm00001d008883
1076	SORBI-3004G236500	0.103395	Zm00001d018058	0.255393	Zm00001d052252	0.263317		0	10	5	8	-0.666667	M2																							Zm00001d008890
1077	SORBI-3004G236200	0.0365431	Zm00001d018060	0.425137	Zm00001d052245	0.559626		16	0	0	0	-1	Not_Neo																							Zm00001d008907
1078	SORBI-3004G236300	0.119296	Zm00001d018061	0.440535	Zm00001d052247	0.153748		0	12	4	0	-0.75	Not_Neo																							Zm00001d008923
1079	SORBI-3004G235900	0.192181	Zm00001d018064	0.122075	Zm00001d052243	0.116538		1	0	5	16	-0.166667	M1_M2																							Zm00001d009146
1080	SORBI-3004G236000	0.076258	Zm00001d018064	0.122075	Zm00001d052243	0.116538		5	2	5	13	0.194444	M2																							Zm00001d009147
1081	SORBI-3004G236100	0.0860537	Zm00001d018064	0.122075	Zm00001d052243	0.116538		1	0	5	15	-0.166667	M1_M2																							Zm00001d009150
1082	SORBI-3004G235200	0.150112	Zm00001d018069	0.23621	Zm00001d052242	0.0639146		14	0	1	8	-0.933333	Not_Neo																							Zm00001d009510
1083	SORBI-3004G234900	0.0637683	Zm00001d018072	0.221183	Zm00001d052239	0.147089		0	15	1	0	-0.9375	Not_Neo																							Zm00001d009570
1084	SORBI-3004G234500	0.228634	Zm00001d018074	0.32407	Zm00001d052237	0.427305		0	3	13	1	-0.1875	Not_Neo																							Zm00001d009603
1085	SORBI-3004G234300	0.10575	Zm00001d018076	0.20801	Zm00001d052234	0.175112		5	0	11	0	-0.3125	Not_Neo																							Zm00001d009652
1086	SORBI-3004G234000	0.368043	Zm00001d018078	0.146237	Zm00001d052232	0.157475		0	2	10	16	-0.166667	M2																							Zm00001d009653
1087	SORBI-3004G233200	0.150817	Zm00001d018081	0.109494	Zm00001d052229	0.556475		0	0	16	0	0	Not_Neo																							Zm00001d009657
1088	SORBI-3004G232900	0.0540891	Zm00001d018082	0.0826618	Zm00001d052227	0.11471		0	12	0	11	-1	M2																							Zm00001d009658
1089	SORBI-3004G232800	0.169815	Zm00001d018085	0.324802	Zm00001d052225	0.337814		0	16	0	0	-1	Not_Neo																							Zm00001d010284
1090	SORBI-3004G232600	0.101979	Zm00001d018087	0.364165	Zm00001d052223	0.152316		6	3	4	6	0.35503	Not_Neo																							Zm00001d010480
1091	SORBI-3004G232500	0.168305	Zm00001d018088	0.204399	Zm00001d052221	0.149992		3	7	6	3	0.265625	Not_Neo																							Zm00001d010487
1092	SORBI-3004G232400	0.142855	Zm00001d018089	0.276349	Zm00001d052220	0.348659	ADP-ribosylation factor family	1	1	3	16	0.16	M1_M2																							Zm00001d010536
1093	SORBI-3004G231800	0.286789	Zm00001d018096	1.37546	Zm00001d052216	0.386742		1	0	15	0	-0.0625	Not_Neo																							Zm00001d010673
1094	SORBI-3004G231400	0.451923	Zm00001d018099	0.189877	Zm00001d052215	0.262234		1	3	12	0	0.015625	Not_Neo																							Zm00001d010675
1095	SORBI-3004G230900	0.237232	Zm00001d018103	0.330622	Zm00001d052212	1.04459		16	0	0	0	-1	Not_Neo																							Zm00001d010751
1096	SORBI-3004G229700	0.0257935	Zm00001d018104	0.255031	Zm00001d052208	0.227554		0	4	5	16	-0.444444	M2																							Zm00001d010958
1097	SORBI-3004G229300	0.074293	Zm00001d018105	0.39893	Zm00001d052206	0.0835067		0	8	8	11	-0.5	Not_Neo																							Zm00001d011073
1098	SORBI-3004G229400	0.116661	Zm00001d018105	0.39893	Zm00001d052206	0.0835067		0	8	8	3	-0.5	Not_Neo																							Zm00001d011088
1099	SORBI-3004G229500	0.10957	Zm00001d018105	0.39893	Zm00001d052206	0.0835067		0	8	8	7	-0.5	Not_Neo																							Zm00001d011366
1100	SORBI-3004G229200	0.0767758	Zm00001d018107	0.141579	Zm00001d052205	0.167405		14	0	2	0	-0.875	Not_Neo																							Zm00001d011463
1101	SORBI-3004G229100	0.0676237	Zm00001d018111	0.0893179	Zm00001d052200	0.155634	Helix-loop-helix DNA-binding domain	8	0	8	0	-0.5	Not_Neo																							Zm00001d011465
1102	SORBI-3004G229000	0.131906	Zm00001d018112	0.0389586	Zm00001d052198	0.0790454		16	0	0	0	-1	Not_Neo																							Zm00001d011466
1103	SORBI-3004G228800	0.0521913	Zm00001d018113	0.148423	Zm00001d052193	0.289484		4	0	12	0	-0.25	Not_Neo																							Zm00001d011467
1104	SORBI-3004G228700	0.161919	Zm00001d018117	0.402229	Zm00001d052190	0.298471		5	0	11	0	-0.3125	Not_Neo																							Zm00001d011614
1105	SORBI-3004G228500	0.0847519	Zm00001d018118	0.182682	Zm00001d052191	0.19308		3	5	3	8	0.429752	M2																							Zm00001d011615
1106	SORBI-3004G228400	0.147041	Zm00001d018119	0.154621	Zm00001d052192	0.377505		0	4	12	1	-0.25	Not_Neo																							Zm00001d011617
1107	SORBI-3004G305000	0.327374	Zm00001d018122	0.255589	Zm00001d052189	0.211863		2	4	8	15	0.122449	M2																							Zm00001d011656
1108	SORBI-3004G305400	0.137435	Zm00001d018126	0.13358	Zm00001d052188	0.0856119		0	1	15	0	-0.0625	Not_Neo																							Zm00001d011657
1109	SORBI-3004G305600	9.53774e-05	Zm00001d018127	0.341171	Zm00001d052186	0.0563925		0	13	3	0	-0.8125	Not_Neo																							Zm00001d011775
1110	SORBI-3004G305700	0.243784	Zm00001d018128	0.107987	Zm00001d052185	0.142878		0	8	8	0	-0.5	Not_Neo																							Zm00001d011776
1111	SORBI-3004G305800	0.278029	Zm00001d018130	0.517552	Zm00001d052184	0.309777	DnaJ C terminal domain	2	5	9	1	0.109375	Not_Neo																							Zm00001d012336
1112	SORBI-3004G306500	0.0910894	Zm00001d018142	0.116763	Zm00001d052180	0.485454		0	13	0	1	-1	Not_Neo																							Zm00001d012337
1113	SORBI-3004G307700	0.218591	Zm00001d018149	0.207081	Zm00001d052174	0.279923		5	1	10	0	0.015625	Not_Neo																							Zm00001d012366
1114	SORBI-3004G307800	0.355029	Zm00001d018150	0.152864	Zm00001d052173	0.247991	Triosephosphate isomerase	3	8	3	16	0.387755	M2																							Zm00001d012368
1115	SORBI-3004G308900	1002.86	Zm00001d018158	0.264153	Zm00001d052167	0.69171		1	0	15	0	-0.0625	Not_Neo																							Zm00001d012888
1116	SORBI-3004G309300	0.0418112	Zm00001d018161	0.130111	Zm00001d052165	0.0693933		2	6	8	1	0.125	Not_Neo																							Zm00001d012890
1117	SORBI-3004G309500	0.0388761	Zm00001d018177	0.165138	Zm00001d052162	0.233119		16	0	0	0	-1	Not_Neo																							Zm00001d012891
1118	SORBI-3004G309800	0.225737	Zm00001d018179	0.318463	Zm00001d052157	0.249937		0	0	16	0	0	Not_Neo																							Zm00001d013040
1119	SORBI-3004G310300	0.158733	Zm00001d018187	0.0943551	Zm00001d052155	0.0693836		16	0	0	0	-1	Not_Neo																							Zm00001d013204
1120	SORBI-3004G310400	0.205219	Zm00001d018190	0.423579	Zm00001d052154	0.264806		0	2	2	16	-0.5	M2																							Zm00001d013348
1121	SORBI-3004G310600	0.145532	Zm00001d018191	0.166092	Zm00001d052152	0.142296		2	0	2	16	-0.5	M1_M2																							Zm00001d013358
1122	SORBI-3004G311400	0.332061	Zm00001d018199	0.304202	Zm00001d052149	0.493001		4	0	12	0	-0.25	Not_Neo																							Zm00001d013359
1123	SORBI-3004G312300	0.278732	Zm00001d018204	0.179204	Zm00001d052144	0.372599		13	0	3	0	-0.8125	Not_Neo																							Zm00001d013360
1124	SORBI-3004G312500	0.0627829	Zm00001d018206	0.0311917	Zm00001d052139	0.0719248		5	0	0	16	-1	M1																							Zm00001d013361
1125	SORBI-3004G312600	0.08651	Zm00001d018207	0.114464	Zm00001d052138	0.21498		2	0	14	0	-0.125	Not_Neo																							Zm00001d013724
1126	SORBI-3004G312800	0.118926	Zm00001d018209	0.370481	Zm00001d052137	0.613819		0	0	2	16	0	M2																							Zm00001d013730
1127	SORBI-3004G313100	0.015576	Zm00001d018211	0.0959998	Zm00001d052136	0.188117		6	3	7	2	0.234375	Not_Neo																							Zm00001d013732
1128	SORBI-3004G313900	0.0721336	Zm00001d018225	0.0687948	Zm00001d052133	0.11175		0	14	1	14	-0.933333	M2																							Zm00001d013753
1129	SORBI-3004G314900	0.500212	Zm00001d018235	0.386157	Zm00001d052125	0.501747		0	6	10	0	-0.375	Not_Neo																							Zm00001d013860
1130	SORBI-3004G315000	0.441339	Zm00001d018237	0.502876	Zm00001d052124	0.313579		0	9	0	16	-1	M2																							Zm00001d013911
1131	SORBI-3004G315100	0.135327	Zm00001d018238	0.0843997	Zm00001d052123	0.435715		5	4	6	8	0.337778	M1																							Zm00001d013914
1132	SORBI-3004G315700	0.112704	Zm00001d018246	0.200949	Zm00001d052120	0.310846	KNOX2 domain	16	0	0	0	-1	Not_Neo																							Zm00001d013947
1133	SORBI-3004G315800	0.137931	Zm00001d018247	0.227234	Zm00001d052118	0.284808		0	7	0	16	-1	M2																							Zm00001d013971
1134	SORBI-3004G317000	0.0704732	Zm00001d018260	0.00610652	Zm00001d052112	0.18068		0	9	7	0	-0.5625	Not_Neo																							Zm00001d014341
1135	SORBI-3004G318100	0.106226	Zm00001d018277	0.151757	Zm00001d052108	0.138048		0	16	0	0	-1	Not_Neo																							Zm00001d014344
1136	SORBI-3004G318200	0.154283	Zm00001d018278	0.192528	Zm00001d052107	0.640284		11	0	5	0	-0.6875	Not_Neo																							Zm00001d014352
1137	SORBI-3004G318400	0.354895	Zm00001d018280	0.526445	Zm00001d052106	1.2037		13	0	3	1	-0.8125	Not_Neo																							Zm00001d014358
1138	SORBI-3004G318600	0.163605	Zm00001d018281	0.125041	Zm00001d052104	0.0720655		3	4	6	14	0.260355	M1_M2																							Zm00001d014360
1139	SORBI-3004G318700	0.192175	Zm00001d018281	0.125041	Zm00001d052104	0.0720655		0	0	6	16	0	M1_M2																							Zm00001d014361
1140	SORBI-3004G319000	0.073486	Zm00001d018282	0.0931263	Zm00001d052104	0.0720655		0	11	5	0	-0.6875	Not_Neo																							Zm00001d014391
1141	SORBI-3004G319700	0.0824666	Zm00001d018288	#N/A	Zm00001d052102	#N/A		10	0	0	13	-1	M1																							Zm00001d014513
1142	SORBI-3004G320800	0.185021	Zm00001d018297	0.281677	Zm00001d052093	0.416849		1	0	15	0	-0.0625	Not_Neo																							Zm00001d014550
1143	SORBI-3004G321300	0.638322	Zm00001d018305	0.398495	Zm00001d052087	0.303167		0	16	0	0	-1	Not_Neo																							Zm00001d014554
1144	SORBI-3004G321900	0.00010543	Zm00001d018309	0.000102539	Zm00001d052078	0.000101079		0	0	16	0	0	Not_Neo																							Zm00001d014562
1145	SORBI-3004G322400	0.105683	Zm00001d018316	0.266698	Zm00001d052070	0.229486	WRC	0	5	11	0	-0.3125	Not_Neo																							Zm00001d014563
1146	SORBI-3004G322800	0.199201	Zm00001d018320	0.136834	Zm00001d052069	0.152575	RNA recognition motif. (a.k.a. RRM, RBD, or RNP domain)	0	13	0	2	-1	Not_Neo																							Zm00001d014626
1147	SORBI-3004G323300	0.13838	Zm00001d018324	0.192254	Zm00001d052068	0.265114		1	7	8	0	0.015625	Not_Neo																							Zm00001d014762
1148	SORBI-3004G323600	0.0236798	Zm00001d018326	0.0247997	Zm00001d052066	#N/A		7	0	9	0	-0.4375	Not_Neo																							Zm00001d014763
1149	SORBI-3004G324000	0.172095	Zm00001d018332	0.186354	Zm00001d052064	#N/A		2	1	1	16	0.25	M1_M2																							Zm00001d014774
1150	SORBI-3004G325100	0.272618	Zm00001d018336	0.12164	Zm00001d052063	0.317452		16	0	0	0	-1	Not_Neo																							Zm00001d014775
1151	SORBI-3004G325300	0.229972	Zm00001d018340	0.370789	Zm00001d052063	0.317452		13	2	1	4	0.234375	Not_Neo																							Zm00001d014906
1152	SORBI-3004G325600	0.000107912	Zm00001d018341	0.0642777	Zm00001d052062	0.771091		0	13	3	0	-0.8125	Not_Neo																							Zm00001d014909
1153	SORBI-3004G325900	0.0357421	Zm00001d018342	0.0524339	Zm00001d052060	0.0544038		0	0	16	0	0	Not_Neo																							Zm00001d014911
1154	SORBI-3004G326000	0.0901036	Zm00001d018343	0.180634	Zm00001d052059	0.236471		15	0	1	1	-0.9375	Not_Neo																							Zm00001d015125
1155	SORBI-3004G326100	#N/A	Zm00001d018344	#N/A	Zm00001d052058	#N/A		2	1	5	16	0.0625	M1_M2																							Zm00001d015434
1156	SORBI-3004G326600	#N/A	Zm00001d018349	#N/A	Zm00001d052056	#N/A		0	16	0	0	-1	Not_Neo																							Zm00001d015435
1157	SORBI-3004G326900	0.00859664	Zm00001d018350	0.0308385	Zm00001d052053	0.0123006	KH domain	0	3	13	0	-0.1875	Not_Neo																							Zm00001d016428
1158	SORBI-3004G327500	2.54666	Zm00001d018361	0.644466	Zm00001d052050	0.203927		0	16	0	0	-1	Not_Neo																							Zm00001d016604
1159	SORBI-3004G328300	0.483152	Zm00001d018365	0.472774	Zm00001d052043	0.135784		16	0	0	0	-1	Not_Neo																							Zm00001d016660
1160	SORBI-3004G329700	0.515698	Zm00001d018372	0.390317	Zm00001d052035	0.328144		0	3	4	16	-0.428571	M1_M2																							Zm00001d016714
1161	SORBI-3004G330100	0.361384	Zm00001d018372	0.390317	Zm00001d052035	0.328144		1	1	4	16	0.111111	M1_M2																							Zm00001d016844
1162	SORBI-3004G330300	0.175071	Zm00001d018372	0.390317	Zm00001d052035	0.328144		0	1	4	16	-0.2	M1_M2																							Zm00001d016850
1163	SORBI-3004G329800	0.0722137	Zm00001d018374	0.251396	Zm00001d052038	0.317283		4	3	8	2	0.195556	M1																							Zm00001d017176
1164	SORBI-3004G331100	0.17404	Zm00001d018382	0.239184	Zm00001d052028	0.260201		2	0	14	0	-0.125	Not_Neo																							Zm00001d017177
1165	SORBI-3004G331400	9.91064e-05	Zm00001d018383	0.00010212	Zm00001d052025	0.000101279		0	0	16	0	0	Not_Neo																							Zm00001d017486
1166	SORBI-3004G331600	0.0771077	Zm00001d018384	0.0181769	Zm00001d052021	0.0488061		1	0	15	0	-0.0625	Not_Neo																							Zm00001d017491
1167	SORBI-3004G332300	0.174402	Zm00001d018391	0.307985	Zm00001d052019	0.35808		16	0	0	0	-1	Not_Neo																							Zm00001d017755
1168	SORBI-3004G332900	0.245278	Zm00001d018394	0.176421	Zm00001d052018	0.0665262		16	0	0	2	-1	Not_Neo																							Zm00001d017812
1169	SORBI-3004G333200	0.793128	Zm00001d018400	0.342767	Zm00001d052016	0.284968		0	16	0	0	-1	Not_Neo																							Zm00001d017814
1170	SORBI-3004G333300	0.232992	Zm00001d018400	0.342767	Zm00001d052015	0.294062		2	6	8	15	0.125	Not_Neo																							Zm00001d018019
1171	SORBI-3004G333600	0.265254	Zm00001d018404	0.0978099	Zm00001d052011	0.421636		6	2	8	0	0.125	Not_Neo																							Zm00001d018134
1172	SORBI-3004G335600	9.96165e-05	Zm00001d018410	9.9669e-05	Zm00001d052003	0.0434398	GWT1	0	0	16	0	0	Not_Neo																							Zm00001d018141
1173	SORBI-3004G336000	0.181056	Zm00001d018413	0.2799	Zm00001d052001	0.232925		16	0	0	0	-1	Not_Neo																							Zm00001d018477
1174	SORBI-3004G336600	0.0183177	Zm00001d018415	0.0124611	Zm00001d051995	0.0143875		0	0	16	0	0	Not_Neo																							Zm00001d018781
1175	SORBI-3004G337200	0.101807	Zm00001d018418	0.208017	Zm00001d051987	0.323058		16	0	0	0	-1	Not_Neo																							Zm00001d018862
1176	SORBI-3004G337300	0.214755	Zm00001d018419	0.134255	Zm00001d051986	0.706888		3	0	13	1	-0.1875	Not_Neo																							Zm00001d018911
1177	SORBI-3004G337500	0.050931	Zm00001d018421	0.105181	Zm00001d051981	0.0908696		0	0	16	0	0	Not_Neo																							Zm00001d018912
1178	SORBI-3004G337925	0.0743912	Zm00001d018428	0.0714383	Zm00001d051977	0.0485138		0	7	9	0	-0.4375	Not_Neo																							Zm00001d018977
1179	SORBI-3004G338100	0.656855	Zm00001d018430	1.0056	Zm00001d051976	0.359006	Putative S-adenosyl-L-methionine-dependent methyltransferase	13	1	2	0	0.015625	Not_Neo																							Zm00001d018979
1180	SORBI-3004G338300	1.00855	Zm00001d018432	0.300415	Zm00001d051967	0.411268		0	16	0	0	-1	Not_Neo																							Zm00001d019354
1181	SORBI-3004G339200	0.0606994	Zm00001d018440	0.0834551	Zm00001d051951	0.044959	Putative S-adenosyl-L-methionine-dependent methyltransferase	1	0	15	0	-0.0625	Not_Neo																							Zm00001d020292
1182	SORBI-3004G339500	0.305698	Zm00001d018441	0.226658	Zm00001d051950	0.355978	Radical SAM ThiC family	14	0	2	0	-0.875	Not_Neo																							Zm00001d020297
1183	SORBI-3004G339600	0.0922319	Zm00001d018443	0.11041	Zm00001d051948	0.0776987		0	0	16	0	0	Not_Neo																							Zm00001d020573
1184	SORBI-3004G339700	0.235122	Zm00001d018444	0.400388	Zm00001d051946	0.313284		0	6	10	0	-0.375	Not_Neo																							Zm00001d020578
1185	SORBI-3004G339800	0.0126077	Zm00001d018445	0.00654347	Zm00001d051945	0.146331		16	0	0	8	-1	Not_Neo																							Zm00001d020580
1186	SORBI-3004G340100	0.0831783	Zm00001d018447	0.594929	Zm00001d051939	0.297604		0	8	7	15	-0.533333	M2																							Zm00001d020583
1187	SORBI-3004G340500	0.296823	Zm00001d018451	0.189424	Zm00001d051936	0.187251		4	4	7	9	0.284444	M2																							Zm00001d020948
1188	SORBI-3004G343700	0.303585	Zm00001d018472	0.0393234	Zm00001d051925	0.229177		9	0	6	10	-0.6	M1																							Zm00001d021051
1189	SORBI-3004G344400	0.343306	Zm00001d018477	0.354512	Zm00001d051917	0.301148		12	0	4	0	-0.75	Not_Neo																							Zm00001d021053
1190	SORBI-3004G345300	0.153423	Zm00001d018483	0.320691	Zm00001d051914	0.186301		1	4	3	16	0.0625	M1_M2																							Zm00001d021069
1191	SORBI-3004G345400	0.300363	Zm00001d018484	0.191337	Zm00001d051913	0.146011		1	0	15	0	-0.0625	Not_Neo																							Zm00001d021193
1192	SORBI-3004G345500	0.159196	Zm00001d018485	0.0395963	Zm00001d051912	0.0577692		0	15	1	0	-0.9375	Not_Neo																							Zm00001d021195
1193	SORBI-3004G346100	0.179576	Zm00001d018489	0.230678	Zm00001d051906	0.280066		4	0	12	4	-0.25	Not_Neo																							Zm00001d021196
1194	SORBI-3004G347400	9.74576e-05	Zm00001d018496	0.061541	Zm00001d051902	0.25405		0	4	12	0	-0.25	Not_Neo																							Zm00001d021261
1195	SORBI-3004G347500	0.250846	Zm00001d018497	0.32311	Zm00001d051901	0.12621		7	0	9	0	-0.4375	Not_Neo																							Zm00001d021263
1196	SORBI-3004G347900	0.223738	Zm00001d018499	0.086833	Zm00001d051900	0.28406	Homeobox KN domain	0	3	13	0	-0.1875	Not_Neo																							Zm00001d021282
1197	SORBI-3004G348200	0.113992	Zm00001d018502	0.11153	Zm00001d051899	0.0517385		0	4	2	16	-0.666667	M2																							Zm00001d021283
1198	SORBI-3004G348300	0.174336	Zm00001d018503	0.119787	Zm00001d051898	0.197566		5	6	5	0	0.453125	Not_Neo																							Zm00001d021294
1199	SORBI-3004G349000	0.15541	Zm00001d018506	0.291835	Zm00001d051890	#N/A	Retinal pigment epithelial membrane protein	6	0	10	0	-0.375	Not_Neo																							Zm00001d021295
1200	SORBI-3004G350100	0.195465	Zm00001d018512	0.133593	Zm00001d051882	0.622387		16	0	0	0	-1	Not_Neo																							Zm00001d021297
1201	SORBI-3004G350200	0.0376444	Zm00001d018514	0.0981951	Zm00001d051881	0.0690628		0	13	3	0	-0.8125	Not_Neo																							Zm00001d021298
1202	SORBI-3004G352100	0.284947	Zm00001d018515	0.35369	Zm00001d051861	0.636121		0	12	4	0	-0.75	Not_Neo																							Zm00001d021363
1203	SORBI-3004G353300	#N/A	Zm00001d018524	#N/A	Zm00001d051856	#N/A		0	13	3	0	-0.8125	Not_Neo																							Zm00001d021430
1204	SORBI-3004G356900	0.0366087	Zm00001d018542	#N/A	Zm00001d051840	#N/A	Dual specificity phosphatase, catalytic domain	7	0	9	0	-0.4375	Not_Neo																							Zm00001d021541
1205	SORBI-3004G357800	0.0334594	Zm00001d018554	0.378907	Zm00001d051836	0.0883177		0	16	0	0	-1	Not_Neo																							Zm00001d021544
1206	SORBI-3002G006600	0.224133	Zm00001d018639	#N/A	Zm00001d007937	#N/A		16	0	0	0	-1	Not_Neo																							Zm00001d021546
1207	SORBI-3002G008900	0.245353	Zm00001d018657	0.33772	Zm00001d007943	0.312696		0	0	16	0	0	Not_Neo																							Zm00001d021551
1208	SORBI-3002G009800	0.274287	Zm00001d018664	0.276494	Zm00001d007947	0.263242		0	6	10	0	-0.375	Not_Neo																							Zm00001d021553
1209	SORBI-3002G010300	0.0734441	Zm00001d018669	0.121714	Zm00001d007951	0.208801		4	0	12	0	-0.25	Not_Neo																							Zm00001d021554
1210	SORBI-3002G014400	0.0113678	Zm00001d018694	0.0478936	Zm00001d007960	0.259765	PPPDE putative peptidase domain	0	0	16	0	0	Not_Neo																							Zm00001d021557
1211	SORBI-3002G016300	0.0801101	Zm00001d018698	0.00678882	Zm00001d007962	0.0719253		3	3	10	0	0.140625	Not_Neo																							Zm00001d021566
1212	SORBI-3002G014800	0.0796372	Zm00001d018699	0.288949	Zm00001d007961	0.111991		1	6	9	0	0.015625	Not_Neo																							Zm00001d021569
1213	SORBI-3002G019000	0.259453	Zm00001d018716	0.199332	Zm00001d007973	0.151095		2	9	1	14	0.305556	M1_M2																							Zm00001d021570
1214	SORBI-3002G019100	0.200438	Zm00001d018716	0.199332	Zm00001d007973	0.151095		3	6	1	15	0.6	M1_M2																							Zm00001d021576
1215	SORBI-3002G019200	#N/A	Zm00001d018716	0.199332	Zm00001d007973	0.151095		0	4	1	16	-0.8	M1_M2																							Zm00001d021577
1216	SORBI-3002G020200	0.267943	Zm00001d018717	0.608781	Zm00001d007974	0.341418		6	3	0	15	0.740741	Not_Neo																							Zm00001d021744
1217	SORBI-3002G022400	0.259333	Zm00001d018730	0.300141	Zm00001d007839	0.320831	Serine carboxypeptidase	16	0	0	0	-1	Not_Neo																							Zm00001d021806
1218	SORBI-3002G026200	0.033086	Zm00001d018749	0.14797	Zm00001d007845	0.090259		14	0	2	0	-0.875	Not_Neo																							Zm00001d021810
1219	SORBI-3002G029300	0.119466	Zm00001d018772	1.05199	Zm00001d007849	0.17011		0	16	0	0	-1	Not_Neo																							Zm00001d021863
1220	SORBI-3002G037400	0.0941495	Zm00001d018819	0.0505434	Zm00001d007876	0.0664621		9	0	0	15	-1	M1																							Zm00001d021864
1221	SORBI-3002G039000	0.121311	Zm00001d018826	0.0814373	Zm00001d007884	0.144159		0	16	0	0	-1	Not_Neo																							Zm00001d021901
1222	SORBI-3002G039100	0.113109	Zm00001d018827	0.195872	Zm00001d007885	0.165315		8	3	4	3	0.337778	Not_Neo																							Zm00001d021902
1223	SORBI-3002G040500	0.128645	Zm00001d018839	0.178438	Zm00001d007918	0.125472		2	0	0	16	-1	M1_M2																							Zm00001d021912
1224	SORBI-3002G040900	0.289659	Zm00001d018844	0.583496	Zm00001d007911	0.379519		8	1	5	9	0.0204082	M1																							Zm00001d021920
1225	SORBI-3002G041533	1009.54	Zm00001d018848	0.00422406	Zm00001d007909	0.0438307		12	3	1	0	0.421875	Not_Neo																							Zm00001d021934
1226	SORBI-3002G042600	0.0156616	Zm00001d018859	0.0690249	Zm00001d007904	0.0505913		2	0	14	0	-0.125	Not_Neo																							Zm00001d022088
1227	SORBI-3002G043300	0.41705	Zm00001d018867	0.0600779	Zm00001d007902	0.298022		0	0	16	0	0	Not_Neo																							Zm00001d022089
1228	SORBI-3002G043400	0.284189	Zm00001d018868	0.9837	Zm00001d007901	1.06123		0	16	0	0	-1	Not_Neo																							Zm00001d022104
1229	SORBI-3002G044000	0.0574236	Zm00001d018873	0.0484949	Zm00001d007900	0.0256262		16	0	0	0	-1	Not_Neo																							Zm00001d022148
1230	SORBI-3002G045100	0.0914444	Zm00001d018882	0.0226488	Zm00001d007898	0.0620697		3	1	12	0	0.015625	Not_Neo																							Zm00001d022275
1231	SORBI-3002G045300	9.84769e-05	Zm00001d018884	0.0309813	Zm00001d007897	0.0383847		0	0	16	0	0	Not_Neo																							Zm00001d022276
1232	SORBI-3002G047000	0.227774	Zm00001d018896	0.259591	Zm00001d007890	0.267123		16	0	0	0	-1	Not_Neo																							Zm00001d022478
1233	SORBI-3002G047700	0.215038	Zm00001d018904	0.189582	Zm00001d007889	0.127216		0	0	16	0	0	Not_Neo																							Zm00001d022481
1234	SORBI-3002G048700	0.155585	Zm00001d018907	0.150755	Zm00001d007837	0.179652		1	1	14	0	0.015625	Not_Neo																							Zm00001d022485
1235	SORBI-3002G048800	0.108675	Zm00001d018908	0.111583	Zm00001d007836	0.139559		5	1	10	0	0.015625	Not_Neo																							Zm00001d022487
1236	SORBI-3002G049000	0.241401	Zm00001d018911	0.185183	Zm00001d007835	0.192583		2	0	14	0	-0.125	Not_Neo																							Zm00001d022573
1237	SORBI-3002G050900	0.0694068	Zm00001d018931	0.0998733	Zm00001d007830	0.0493306	Tetratricopeptide repeat	0	16	0	0	-1	Not_Neo																							Zm00001d022574
1238	SORBI-3002G052000	0.0647537	Zm00001d018940	0.16966	Zm00001d007827	0.175237		0	16	0	5	-1	Not_Neo																							Zm00001d022575
1239	SORBI-3002G052700	0.478435	Zm00001d018944	0.313276	Zm00001d007826	0.488463		8	0	8	0	-0.5	Not_Neo																							Zm00001d022576
1240	SORBI-3002G053000	0.68744	Zm00001d018947	0.352316	Zm00001d007825	0.61189		1	11	4	7	0.015625	Not_Neo																							Zm00001d022584
1241	SORBI-3002G054000	0.0254771	Zm00001d018957	0.0640201	Zm00001d007824	0.0207879		0	0	16	0	0	Not_Neo																							Zm00001d022588
1242	SORBI-3002G054300	#N/A	Zm00001d018959	#N/A	Zm00001d007823	#N/A		0	7	9	0	-0.4375	Not_Neo																							Zm00001d022590
1243	SORBI-3002G055400	0.344902	Zm00001d018962	0.194235	Zm00001d007820	0.139687	SURF1 family	8	3	3	9	0.387755	M1																							Zm00001d022619
1244	SORBI-3002G056200	9.71244e-05	Zm00001d018979	0.0205168	Zm00001d007819	9.87774e-05		0	9	7	0	-0.5625	Not_Neo																							Zm00001d022629
1245	SORBI-3002G056900	0.322137	Zm00001d018986	1.07345	Zm00001d007802	0.473721		16	0	0	0	-1	Not_Neo																							Zm00001d022630
1246	SORBI-3002G057900	0.189707	Zm00001d019034	0.165799	Zm00001d007800	0.131977	Glycosyl hydrolases family 43	16	0	0	0	-1	Not_Neo																							Zm00001d022631
1247	SORBI-3002G058700	#N/A	Zm00001d019041	#N/A	Zm00001d007799	#N/A		16	0	0	0	-1	Not_Neo																							Zm00001d022636
1248	SORBI-3002G061600	0.102577	Zm00001d019049	0.11391	Zm00001d007785	0.100037		3	0	9	14	-0.25	M2																							Zm00001d022637
1249	SORBI-3002G067000	0.0758428	Zm00001d019078	0.0793785	Zm00001d007773	0.00168821		16	0	0	1	-1	Not_Neo																							Zm00001d022647
1250	SORBI-3002G067300	0.125432	Zm00001d019078	0.0793785	Zm00001d007773	0.00168821		16	0	0	0	-1	Not_Neo																							Zm00001d023863
1251	SORBI-3002G067100	0.0724152	Zm00001d019079	0.104438	Zm00001d007772	0.204896		0	4	12	0	-0.25	Not_Neo																							Zm00001d023867
1252	SORBI-3002G067600	0.0497455	Zm00001d019079	0.104438	Zm00001d007772	0.204896		0	4	12	0	-0.25	Not_Neo																							Zm00001d024532
1253	SORBI-3002G067800	0.217642	Zm00001d019087	0.59649	Zm00001d007770	0.201194	PPR repeat	0	13	3	0	-0.8125	Not_Neo																							Zm00001d024708
1254	SORBI-3002G068100	0.528066	Zm00001d019090	0.284509	Zm00001d007769	0.397106		9	0	7	0	-0.5625	Not_Neo																							Zm00001d024710
1255	SORBI-3002G068300	9.47261e-05	Zm00001d019091	0.169445	Zm00001d007767	0.000102426		4	0	12	0	-0.25	Not_Neo																							Zm00001d024715
1256	SORBI-3002G068900	0	Zm00001d019093	0.0549995	Zm00001d007763	0.0718009		0	7	9	0	-0.4375	Not_Neo																							Zm00001d024778
1257	SORBI-3002G070300	0.103021	Zm00001d019104	0.129741	Zm00001d007760	0.0857177	Telomere recombination	0	1	15	0	-0.0625	Not_Neo																							Zm00001d024995
1258	SORBI-3002G070600	0.0611577	Zm00001d019106	0.0474789	Zm00001d007758	0.0318445		0	0	16	0	0	Not_Neo																							Zm00001d024996
1259	SORBI-3002G074000	0.192194	Zm00001d019145	0.0769594	Zm00001d005252	0.115674		13	0	3	0	-0.8125	Not_Neo																							Zm00001d025055
1260	SORBI-3002G075500	0.0508222	Zm00001d019149	0.00545218	Zm00001d005250	0.0268327		0	2	14	0	-0.125	Not_Neo																							Zm00001d025057
1261	SORBI-3002G075900	0.045898	Zm00001d019164	#N/A	Zm00001d005248	#N/A		0	0	16	0	0	Not_Neo																							Zm00001d025062
1262	SORBI-3002G076100	0.359152	Zm00001d019166	0.182624	Zm00001d005244	0.241341		0	2	14	0	-0.125	Not_Neo																							Zm00001d025063
1263	SORBI-3002G076500	0.457206	Zm00001d019169	0.250595	Zm00001d005240	0.339089		1	1	14	0	0.015625	Not_Neo																							Zm00001d025106
1264	SORBI-3002G077900	0.0230185	Zm00001d019182	0.264641	Zm00001d005238	0.097836		0	16	0	0	-1	Not_Neo																							Zm00001d025107
1265	SORBI-3002G078400	9.84909e-05	Zm00001d019191	9.46365e-05	Zm00001d005231	#N/A		15	0	1	0	-0.9375	Not_Neo																							Zm00001d025108
1266	SORBI-3002G078500	#N/A	Zm00001d019192	#N/A	Zm00001d005230	#N/A	Kelch motif	1	3	2	6	0.111111	Not_Neo																							Zm00001d025111
1267	SORBI-3002G079000	0.258235	Zm00001d019194	0.220923	Zm00001d005229	0.177203		2	3	11	0	0.078125	Not_Neo																							Zm00001d025126
1268	SORBI-3002G080100	0.0362442	Zm00001d019207	0.04815	Zm00001d005208	0.0553517		9	0	7	0	-0.5625	Not_Neo																							Zm00001d025128
1269	SORBI-3002G081100	0.0816951	Zm00001d019215	0.0462152	Zm00001d005205	0.159641		0	7	9	0	-0.4375	Not_Neo																							Zm00001d025130
1270	SORBI-3002G081300	#N/A	Zm00001d019216	#N/A	Zm00001d005203	#N/A		8	0	0	16	-1	M1																							Zm00001d025134
1271	SORBI-3002G081600	0.0367284	Zm00001d019219	0.0226674	Zm00001d005200	0.000101981		16	0	0	0	-1	Not_Neo																							Zm00001d025234
1272	SORBI-3002G083800	0.0922174	Zm00001d019233	0.0654047	Zm00001d005182	0.0709591		3	0	13	0	-0.1875	Not_Neo																							Zm00001d025236
1273	SORBI-3002G083900	0.648632	Zm00001d019234	0.286152	Zm00001d005179	0.274034		0	16	0	0	-1	Not_Neo																							Zm00001d025237
1274	SORBI-3002G084500	0.150999	Zm00001d019241	0.000106233	Zm00001d005178	0.43828		3	0	13	0	-0.1875	Not_Neo																							Zm00001d025239
1275	SORBI-3002G085700	0.13649	Zm00001d019254	#N/A	Zm00001d005456	0.266132		4	4	8	0	0.25	Not_Neo																							Zm00001d025371
1276	SORBI-3002G085300	0.222069	Zm00001d019254	#N/A	Zm00001d005456	0.266132		4	4	8	13	0.25	Not_Neo																							Zm00001d025980
1277	SORBI-3002G090200	0.0913499	Zm00001d019279	0.0538684	Zm00001d005459	0.17439		1	1	14	0	0.015625	Not_Neo																							Zm00001d025982
1278	SORBI-3002G090300	0.267635	Zm00001d019280	0.13613	Zm00001d005459	0.17439		0	6	10	0	-0.375	Not_Neo																							Zm00001d025984
1279	SORBI-3002G090500	#N/A	Zm00001d019283	#N/A	Zm00001d005460	#N/A	MFS/sugar transport protein	13	0	3	0	-0.8125	Not_Neo																							Zm00001d025985
1280	SORBI-3002G090700	0.162598	Zm00001d019287	#N/A	Zm00001d005461	0.271959		16	0	0	0	-1	Not_Neo																							Zm00001d026023
1281	SORBI-3002G090800	9.45767e-05	Zm00001d019288	0.890626	Zm00001d005462	0.612912		1	0	15	0	-0.0625	Not_Neo																							Zm00001d026037
1282	SORBI-3002G092200	0.167282	Zm00001d019298	0.20891	Zm00001d005468	0.132571		0	16	0	0	-1	Not_Neo																							Zm00001d026038
1283	SORBI-3002G092600	0.124995	Zm00001d019303	0.0422212	Zm00001d005470	0.143988		0	8	8	4	-0.5	Not_Neo																							Zm00001d026039
1284	SORBI-3002G092500	0.0438119	Zm00001d019304	0.0813589	Zm00001d005470	0.143988		0	0	1	16	0	M2																							Zm00001d026079
1285	SORBI-3002G092700	0.0494705	Zm00001d019304	0.0813589	Zm00001d005470	0.143988		0	14	1	8	-0.933333	M2																							Zm00001d026214
1286	SORBI-3002G092801	0.18521	Zm00001d019304	0.0813589	Zm00001d005470	0.143988		0	15	1	2	-0.9375	Not_Neo																							Zm00001d026465
1287	SORBI-3002G093600	#N/A	Zm00001d019312	#N/A	Zm00001d005472	#N/A		1	0	0	16	-1	M1																							Zm00001d027477
1288	SORBI-3002G093700	#N/A	Zm00001d019312	#N/A	Zm00001d005472	#N/A		16	0	0	0	-1	Not_Neo																							Zm00001d027645
1289	SORBI-3002G093800	#N/A	Zm00001d019312	#N/A	Zm00001d005472	#N/A		1	0	0	16	-1	M1																							Zm00001d027656
1290	SORBI-3002G093900	0.384423	Zm00001d019314	0.383241	Zm00001d005473	0.292056		2	2	12	2	0.0625	Not_Neo																							Zm00001d027853
1291	SORBI-3002G094600	0.0495981	Zm00001d019317	0.0489606	Zm00001d005478	0.149631		9	0	7	0	-0.5625	Not_Neo																							Zm00001d027892
1292	SORBI-3002G095400	0.0765186	Zm00001d019327	0.0721733	Zm00001d005479	0.131108		4	10	2	7	0.53125	Not_Neo																							Zm00001d027922
1293	SORBI-3002G095600	0.168603	Zm00001d019327	0.0721733	Zm00001d005479	0.131108		1	6	2	16	0.0493827	M1_M2																							Zm00001d028120
1294	SORBI-3002G105200	0.207947	Zm00001d019363	0.277556	Zm00001d005501	0.363445		3	3	10	0	0.140625	Not_Neo																							Zm00001d028130
1295	SORBI-3002G113100	0.651356	Zm00001d019457	0.19408	Zm00001d005158	0.149377		2	9	0	12	0.363636	M2																							Zm00001d028165
1296	SORBI-3002G113800	0.0418967	Zm00001d019467	0.116393	Zm00001d005159	0.120032		0	12	4	0	-0.75	Not_Neo																							Zm00001d028303
1297	SORBI-3002G117700	0.249683	Zm00001d019497	0.433242	Zm00001d005453	0.123638		0	16	0	0	-1	Not_Neo																							Zm00001d028304
1298	SORBI-3002G117900	0.259529	Zm00001d019497	0.433242	Zm00001d005453	0.123638		0	6	0	15	-1	M2																							Zm00001d028349
1299	SORBI-3002G118700	0.0197536	Zm00001d019507	0.0837658	Zm00001d005451	0.101387		2	6	8	0	0.125	Not_Neo																							Zm00001d028352
1300	SORBI-3002G119400	0.112192	Zm00001d019515	0.0505834	Zm00001d005450	0.163986	Glutaredoxin	13	0	3	0	-0.8125	Not_Neo																							Zm00001d028354
1301	SORBI-3002G119600	0.299286	Zm00001d019520	0.247508	Zm00001d005445	0.174245	COQ9	8	0	7	0	-0.533333	Not_Neo																							Zm00001d028355
1302	SORBI-3002G119700	0.0669245	Zm00001d019522	0.157992	Zm00001d005442	0.144054		0	1	15	5	-0.0625	Not_Neo																							Zm00001d028356
1303	SORBI-3002G120300	0.080194	Zm00001d019527	0.0753486	Zm00001d005439	0.0970076		14	0	1	6	-0.933333	Not_Neo																							Zm00001d028412
1304	SORBI-3002G120400	0.00278697	Zm00001d019527	0.0753486	Zm00001d005439	0.0970076		6	0	1	12	-0.857143	M1																							Zm00001d028481
1305	SORBI-3002G123200	0.000101308	Zm00001d019553	0.562242	Zm00001d005423	#N/A		16	0	0	0	-1	Not_Neo																							Zm00001d028513
1306	SORBI-3002G124700	9.92821e-05	Zm00001d019563	0.0281386	Zm00001d005421	0.0462409		15	0	1	0	-0.9375	Not_Neo																							Zm00001d028514
1307	SORBI-3002G125000	0.0379887	Zm00001d019565	0.0131786	Zm00001d005410	0.0582581		5	0	0	16	-1	M1																							Zm00001d028515
1308	SORBI-3002G125200	0.0308619	Zm00001d019565	0.0131786	Zm00001d005410	0.0582581		2	0	0	16	-1	M1																							Zm00001d030667
1309	SORBI-3002G125700	0.0184101	Zm00001d019565	0.0131786	Zm00001d005410	0.0582581		16	0	0	0	-1	Not_Neo																							Zm00001d030670
1310	SORBI-3002G125900	0.0855407	Zm00001d019576	0.0253089	Zm00001d005396	0.0453282		1	4	11	0	0.015625	Not_Neo																							Zm00001d030672
1311	SORBI-3002G127100	0.416686	Zm00001d019579	0.214461	Zm00001d005406	0.141928		10	0	6	0	-0.625	Not_Neo																							Zm00001d030759
1312	SORBI-3002G128200	0.0667855	Zm00001d019595	0.0458136	Zm00001d005395	0.468582		16	0	0	0	-1	Not_Neo																							Zm00001d030760
1313	SORBI-3002G128800	0.0819302	Zm00001d019597	0.0276752	Zm00001d005394	0.0170935		16	0	0	0	-1	Not_Neo																							Zm00001d030985
1314	SORBI-3002G129000	0.104695	Zm00001d019600	0.405653	Zm00001d005393	0.469364	GGL domain	0	2	14	0	-0.125	Not_Neo																							Zm00001d030990
1315	SORBI-3002G130900	0.220724	Zm00001d019637	#N/A	Zm00001d005373	#N/A		0	14	2	0	-0.875	Not_Neo																							Zm00001d031002
1316	SORBI-3002G131900	0.153008	Zm00001d019650	0.186926	Zm00001d005368	0.214266	ATP-dependent protease La (LON) substrate-binding domain	0	3	13	2	-0.1875	Not_Neo																							Zm00001d031005
1317	SORBI-3002G144800	0.208914	Zm00001d019696	#N/A	Zm00001d005293	#N/A		0	12	4	10	-0.75	Not_Neo																							Zm00001d031627
1318	SORBI-3002G142500	0.339942	Zm00001d019700	0.361019	Zm00001d005297	0.572715	Early Flowering 4 domain	11	0	5	0	-0.6875	Not_Neo																							Zm00001d031677
1319	SORBI-3002G142200	0.111327	Zm00001d019701	0.236345	Zm00001d005298	0.194786		0	16	0	1	-1	Not_Neo																							Zm00001d032239
1320	SORBI-3002G141300	0.127214	Zm00001d019712	0.161109	Zm00001d005300	0.44913	Cytochrome P450	2	4	1	6	0.489796	Not_Neo																							Zm00001d032307
1321	SORBI-3002G141000	0.122036	Zm00001d019718	0.269472	Zm00001d005302	0.370667		1	0	15	0	-0.0625	Not_Neo																							Zm00001d032308
1322	SORBI-3002G139600	0.0096347	Zm00001d019733	1.14674	Zm00001d005308	0.188639		0	0	16	0	0	Not_Neo																							Zm00001d032310
1323	SORBI-3002G139400	0.132241	Zm00001d019734	0.146073	Zm00001d005309	#N/A		14	0	0	3	-1	M1																							Zm00001d032311
1324	SORBI-3002G139300	0.0913942	Zm00001d019744	0.0894392	Zm00001d005309	#N/A		2	4	0	16	0.666667	Not_Neo																							Zm00001d032610
1325	SORBI-3002G138700	0.0898694	Zm00001d019750	#N/A	Zm00001d005315	0.100854		0	13	3	0	-0.8125	Not_Neo																							Zm00001d032781
1326	SORBI-3002G138100	0.198918	Zm00001d019759	0.130192	Zm00001d005317	0.156644		0	7	8	13	-0.466667	M2																							Zm00001d032948
1327	SORBI-3002G133300	0.525971	Zm00001d019856	#N/A	Zm00001d005350	#N/A	PPR repeat	4	0	12	0	-0.25	Not_Neo																							Zm00001d032950
1328	SORBI-3002G134600	0.251481	Zm00001d019875	#N/A	Zm00001d005338	0.194727		0	16	0	0	-1	Not_Neo																							Zm00001d033044
1329	SORBI-3002G157000	#N/A	Zm00001d019968	#N/A	Zm00001d005516	#N/A		0	10	6	0	-0.625	Not_Neo																							Zm00001d033048
1330	SORBI-3002G156100	0.221548	Zm00001d019980	0.51195	Zm00001d005520	0.278836		2	7	7	14	0.140625	Not_Neo																							Zm00001d033049
1331	SORBI-3002G155500	9.39522e-05	Zm00001d019981	0.0650156	Zm00001d005532	0.0567666		3	0	13	0	-0.1875	Not_Neo																							Zm00001d033050
1332	SORBI-3002G155100	0.0981344	Zm00001d019988	0.266181	Zm00001d005535	0.306493		16	0	0	0	-1	Not_Neo																							Zm00001d033053
1333	SORBI-3002G159900	0.229095	Zm00001d020004	0.195194	Zm00001d005542	0.328623		0	1	15	0	-0.0625	Not_Neo																							Zm00001d033054
1334	SORBI-3002G161700	0.159772	Zm00001d020019	0.130106	Zm00001d005547	0.313619		0	3	13	0	-0.1875	Not_Neo																							Zm00001d033056
1335	SORBI-3002G162400	0.195272	Zm00001d020023	0.0852118	Zm00001d005554	0.10782		4	2	10	8	0.09375	Not_Neo																							Zm00001d033058
1336	SORBI-3002G162800	0.130388	Zm00001d020025	#N/A	Zm00001d005578	0.362312		2	3	6	9	0.165289	M1_M2																							Zm00001d033451
1337	SORBI-3002G164800	0.272132	Zm00001d020038	0.301553	Zm00001d005563	0.343749		8	0	8	3	-0.5	Not_Neo																							Zm00001d033612
1338	SORBI-3002G165140	0.212286	Zm00001d020040	0.204333	Zm00001d005579	0.13981	Glycosyl transferase family 8	5	1	10	0	0.015625	Not_Neo																							Zm00001d033615
1339	SORBI-3002G165800	0.233871	Zm00001d020046	0.284327	Zm00001d005584	0.13754		4	0	12	6	-0.25	Not_Neo																							Zm00001d033623
1340	SORBI-3002G166300	0.132847	Zm00001d020051	0.259838	Zm00001d005586	0.285463		15	0	1	0	-0.9375	Not_Neo																							Zm00001d033624
1341	SORBI-3002G169300	0.0438075	Zm00001d020071	0.0374837	Zm00001d005594	#N/A		0	2	4	16	-0.333333	M2																							Zm00001d033649
1342	SORBI-3002G170100	0.112861	Zm00001d020093	#N/A	Zm00001d005598	#N/A		11	0	5	3	-0.6875	Not_Neo																							Zm00001d033668
1343	SORBI-3002G172000	0.200879	Zm00001d020100	#N/A	Zm00001d005609	0.0611543	Cytochrome P450	0	16	0	2	-1	Not_Neo																							Zm00001d033674
1344	SORBI-3002G174200	0.342062	Zm00001d020136	0.254977	Zm00001d005622	0.258393		14	0	0	8	-1	M1																							Zm00001d033714
1345	SORBI-3002G174300	0.0959331	Zm00001d020137	0.220412	Zm00001d005622	0.258393		16	0	0	0	-1	Not_Neo																							Zm00001d033717
1346	SORBI-3002G175400	0.066321	Zm00001d020147	0.0360964	Zm00001d005624	0.0302387		0	12	4	0	-0.75	Not_Neo																							Zm00001d033718
1347	SORBI-3002G176000	0.239231	Zm00001d020170	0.319889	Zm00001d005629	0.180381	X8 domain	2	0	0	15	-1	M1																							Zm00001d033860
1348	SORBI-3002G176100	0.157225	Zm00001d020170	0.319889	Zm00001d005629	0.180381	X8 domain	16	0	0	0	-1	Not_Neo																							Zm00001d033945
1349	SORBI-3002G176200	0.32458	Zm00001d020170	0.319889	Zm00001d005629	0.180381	X8 domain	16	0	0	0	-1	Not_Neo																							Zm00001d033951
1350	SORBI-3002G176900	0.569328	Zm00001d020175	0.249544	Zm00001d005636	0.287308		0	0	16	16	0	Not_Neo																							Zm00001d034199
1351	SORBI-3002G177000	0.350553	Zm00001d020175	0.249544	Zm00001d005636	0.287308		0	0	16	0	0	Not_Neo																							Zm00001d034453
1352	SORBI-3002G177400	0.174369	Zm00001d020178	0.172828	Zm00001d005638	0.188996		0	1	15	0	-0.0625	Not_Neo																							Zm00001d034590
1353	SORBI-3002G179150	0.130075	Zm00001d020195	0.219013	Zm00001d005641	#N/A		5	4	7	0	0.296875	Not_Neo																							Zm00001d034835
1354	SORBI-3002G179300	#N/A	Zm00001d020201	#N/A	Zm00001d005642	#N/A		0	0	16	0	0	Not_Neo																							Zm00001d034884
1355	SORBI-3002G179500	0.0219649	Zm00001d020205	0.261138	Zm00001d005645	0.229709		5	0	11	0	-0.3125	Not_Neo																							Zm00001d034885
1356	SORBI-3002G180000	0.102394	Zm00001d020213	0.0432763	Zm00001d005647	0.107568		2	0	14	0	-0.125	Not_Neo																							Zm00001d034887
1357	SORBI-3002G180300	0.195674	Zm00001d020219	0.249031	Zm00001d005649	0.112209		0	0	16	0	0	Not_Neo																							Zm00001d034990
1358	SORBI-3002G180900	0.467047	Zm00001d020228	1.17589	Zm00001d005650	0.701645	AP2 domain	3	1	12	0	0.015625	Not_Neo																							Zm00001d035303
1359	SORBI-3002G181300	0.56977	Zm00001d020233	#N/A	Zm00001d005653	#N/A		3	1	12	0	0.015625	Not_Neo																							Zm00001d035304
1360	SORBI-3002G182800	0.209451	Zm00001d020250	0.212336	Zm00001d005654	0.24612	Histidine biosynthesis protein	0	8	0	11	-1	M2																							Zm00001d035323
1361	SORBI-3002G182900	0.336611	Zm00001d020250	0.212336	Zm00001d005654	0.24612	Histidine biosynthesis protein	0	6	0	15	-1	M2																							Zm00001d035333
1362	SORBI-3002G183100	0.278764	Zm00001d020251	0.200718	Zm00001d005654	0.24612		2	1	11	12	0.0204082	M1_M2																							Zm00001d035336
1363	SORBI-3002G183200	0.169401	Zm00001d020251	0.200718	Zm00001d005654	0.24612		3	2	11	3	0.078125	Not_Neo																							Zm00001d035589
1364	SORBI-3002G183400	0.000113633	Zm00001d020257	0.0570533	Zm00001d005656	0.107286		14	0	0	9	-1	M1																							Zm00001d035907
1365	SORBI-3002G183900	0.138673	Zm00001d020264	0.225715	Zm00001d005657	0.241944		1	0	0	16	-1	M1_M2																							Zm00001d035913
1366	SORBI-3002G184600	0.130762	Zm00001d020272	0.0246496	Zm00001d005658	0.139308		9	0	2	12	-0.818182	M1																							Zm00001d035933
1367	SORBI-3002G184800	0.346917	Zm00001d020273	0.327483	Zm00001d005661	0.342274		6	6	3	5	0.64	Not_Neo																							Zm00001d036343
1368	SORBI-3002G184900	0.224693	Zm00001d020274	0.836357	Zm00001d005662	0.427532		0	16	0	0	-1	Not_Neo																							Zm00001d036348
1369	SORBI-3002G185200	0.222478	Zm00001d020275	0.330207	Zm00001d005664	#N/A		10	0	6	5	-0.625	Not_Neo																							Zm00001d036428
1370	SORBI-3002G186200	0.145427	Zm00001d020296	0.039826	Zm00001d005671	0.39624		6	0	10	0	-0.375	Not_Neo																							Zm00001d036565
1371	SORBI-3002G186900	0.0443842	Zm00001d020309	0.603573	Zm00001d005674	0.144757		16	0	0	0	-1	Not_Neo																							Zm00001d036597
1372	SORBI-3002G187700	0.0371388	Zm00001d020315	0.151312	Zm00001d005684	0.0686228		13	0	3	0	-0.8125	Not_Neo																							Zm00001d036598
1373	SORBI-3002G188200	0.145823	Zm00001d020323	0.2811	Zm00001d005685	0.371396		13	0	3	2	-0.8125	Not_Neo																							Zm00001d036692
1374	SORBI-3002G188900	#N/A	Zm00001d020337	#N/A	Zm00001d005690	#N/A	CCAAT-binding transcription factor (CBF-B/NF-YA) subunit B	2	0	2	16	-0.5	M1																							Zm00001d036716
1375	SORBI-3002G190900	0.747219	Zm00001d020354	0.692354	Zm00001d005695	0.161041		0	16	0	0	-1	Not_Neo																							Zm00001d036720
1376	SORBI-3002G191000	0.185501	Zm00001d020355	0.371085	Zm00001d005696	0.264678		0	5	11	0	-0.3125	Not_Neo																							Zm00001d036742
1377	SORBI-3002G192101	0.0991389	Zm00001d020358	0.1295	Zm00001d005699	0.188546		1	1	14	0	0.015625	Not_Neo																							Zm00001d036777
1378	SORBI-3002G192500	0.0278394	Zm00001d020361	0.0587461	Zm00001d005705	#N/A		8	3	5	0	0.296875	Not_Neo																							Zm00001d036815
1379	SORBI-3002G192900	0.00937331	Zm00001d020363	0.201084	Zm00001d005707	0.1695		0	0	16	0	0	Not_Neo																							Zm00001d036816
1380	SORBI-3002G194100	0.242892	Zm00001d020381	0.173479	Zm00001d005713	0.142463		0	0	16	0	0	Not_Neo																							Zm00001d036897
1381	SORBI-3002G194600	0.10237	Zm00001d020395	0.0496753	Zm00001d005715	9.8462e-05		16	0	0	0	-1	Not_Neo																							Zm00001d036902
1382	SORBI-3002G196200	0.199856	Zm00001d020409	0.409881	Zm00001d005726	0.248758		0	15	1	0	-0.9375	Not_Neo																							Zm00001d036903
1383	SORBI-3002G196350	15.3	Zm00001d020411	0.228571	Zm00001d005727	0.223132		0	4	12	0	-0.25	Not_Neo																							Zm00001d036904
1384	SORBI-3002G197000	0.0646232	Zm00001d020418	0.095014	Zm00001d005729	#N/A		2	0	1	16	-0.666667	M1																							Zm00001d036905
1385	SORBI-3002G197100	0.379967	Zm00001d020419	0.202971	Zm00001d005732	0.337154		0	0	16	0	0	Not_Neo																							Zm00001d036970
1386	SORBI-3002G197400	0.148022	Zm00001d020425	997.926	Zm00001d005733	0.0134091		6	2	5	11	0.189349	M1_M2																							Zm00001d037004
1387	SORBI-3002G197600	0.0384614	Zm00001d020429	0.0765129	Zm00001d005735	0.0924149		15	0	0	7	-1	M1																							Zm00001d037059
1388	SORBI-3002G200700	0.480067	Zm00001d020454	0.222128	Zm00001d005764	0.318387		3	6	6	11	0.266667	Not_Neo																							Zm00001d037060
1389	SORBI-3002G201000	0.0421424	Zm00001d020457	0.388918	Zm00001d005760	0.142752		4	1	1	15	0.111111	M1_M2																							Zm00001d037066
1390	SORBI-3002G202100	0.113986	Zm00001d020470	#N/A	Zm00001d005752	#N/A	N-terminal domain of argonaute	3	0	13	6	-0.1875	Not_Neo																							Zm00001d037067
1391	SORBI-3002G202000	1.09496	Zm00001d020476	#N/A	Zm00001d005754	0.777685		0	14	2	0	-0.875	Not_Neo																							Zm00001d037073
1392	SORBI-3002G202300	0.0838366	Zm00001d020485	0.0247689	Zm00001d005751	0.177146		0	0	16	0	0	Not_Neo																							Zm00001d037091
1393	SORBI-3002G202600	0.0906054	Zm00001d020490	0.190739	Zm00001d005750	0.156611	Sec23-binding domain of Sec16	10	1	0	16	0.0330579	Not_Neo																							Zm00001d037103
1394	SORBI-3002G202700	0.276107	Zm00001d020492	0.317695	Zm00001d005749	0.226936		15	0	0	4	-1	M1																							Zm00001d037105
1395	SORBI-3002G203000	0.055496	Zm00001d020496	0.0973271	Zm00001d005748	0.103748		16	0	0	3	-1	Not_Neo																							Zm00001d037108
1396	SORBI-3002G203900	0.128198	Zm00001d020505	0.376455	Zm00001d005767	#N/A		0	15	0	3	-1	Not_Neo																							Zm00001d037136
1397	SORBI-3002G204300	0.160773	Zm00001d020512	0.119382	Zm00001d005769	0.125472		14	0	2	0	-0.875	Not_Neo																							Zm00001d037233
1398	SORBI-3002G204600	0.583766	Zm00001d020519	0.835296	Zm00001d005772	0.665529		1	0	15	0	-0.0625	Not_Neo																							Zm00001d037239
1399	SORBI-3002G205500	0.0110023	Zm00001d020531	0.0509014	Zm00001d005775	0.0175728		1	2	1	15	0.25	M1																							Zm00001d037328
1400	SORBI-3002G205900	0.238016	Zm00001d020533	0.30876	Zm00001d005776	0.189896		0	0	0	16	NA	M2																							Zm00001d037370
1401	SORBI-3002G209200	9.78495e-05	Zm00001d020568	0.88869	Zm00001d005783	0.22441		1	7	8	4	0.015625	Not_Neo																							Zm00001d037574
1402	SORBI-3002G209300	0.0483496	Zm00001d020569	0.242096	Zm00001d005784	0.396124		3	0	0	16	-1	M1																							Zm00001d037695
1403	SORBI-3002G210200	#N/A	Zm00001d020580	#N/A	Zm00001d005789	#N/A		16	0	0	0	-1	Not_Neo																							Zm00001d037711
1404	SORBI-3002G210300	0.0912785	Zm00001d020583	0.11489	Zm00001d005790	0.201639		2	4	10	10	0.09375	Not_Neo																							Zm00001d037884
1405	SORBI-3002G210401	0.122823	Zm00001d020583	0.11489	Zm00001d005790	0.201639		2	4	10	13	0.09375	Not_Neo																							Zm00001d037971
1406	SORBI-3002G210500	0.000100982	Zm00001d020584	0.000101079	Zm00001d005791	0.000100366		0	0	16	0	0	Not_Neo																							Zm00001d037974
1407	SORBI-3002G211800	0.0314571	Zm00001d020593	0.0577928	Zm00001d005794	0.106833		1	4	11	0	0.015625	Not_Neo																							Zm00001d037975
1408	SORBI-3002G212000	0.566164	Zm00001d020595	0.28347	Zm00001d005798	0.276186		1	7	8	0	0.015625	Not_Neo																							Zm00001d038079
1409	SORBI-3002G213500	0	Zm00001d020605	0.032434	Zm00001d005802	0.0818999		0	4	0	16	-1	M2																							Zm00001d038080
1410	SORBI-3002G213600	0.734537	Zm00001d020606	0.390812	Zm00001d005803	0.44226		16	0	0	0	-1	Not_Neo																							Zm00001d038082
1411	SORBI-3002G214400	0.871876	Zm00001d020612	0.34905	Zm00001d005808	0.818509		1	1	14	0	0.015625	Not_Neo																							Zm00001d038084
1412	SORBI-3002G214800	2.00461	Zm00001d020614	0.217279	Zm00001d005813	0.446736		16	0	0	0	-1	Not_Neo																							Zm00001d038146
1413	SORBI-3002G215100	0.274176	Zm00001d020617	0.190881	Zm00001d005816	0.217452		10	0	6	3	-0.625	Not_Neo																							Zm00001d038203
1414	SORBI-3002G215200	0.27466	Zm00001d020618	0.186778	Zm00001d005817	0.203292		0	4	12	0	-0.25	Not_Neo																							Zm00001d038229
1415	SORBI-3002G215800	0.208687	Zm00001d020623	0.139067	Zm00001d005819	#N/A		16	0	0	0	-1	Not_Neo																							Zm00001d038262
1416	SORBI-3002G216200	0.11873	Zm00001d020628	0.0973676	Zm00001d005823	0.0843907		1	0	4	16	-0.2	M1																							Zm00001d038266
1417	SORBI-3002G216400	0.0287502	Zm00001d020628	0.0973676	Zm00001d005823	0.0843907		0	0	4	16	0	M1																							Zm00001d038607
1418	SORBI-3002G216500	0.017803	Zm00001d020628	0.0973676	Zm00001d005823	0.0843907		1	0	4	16	-0.2	M1																							Zm00001d038608
1419	SORBI-3002G216600	0.258592	Zm00001d020629	0.239419	Zm00001d005824	0.213335		1	6	9	9	0.015625	Not_Neo																							Zm00001d038609
1420	SORBI-3002G217200	0.658652	Zm00001d020636	0.107102	Zm00001d005828	0.12682		16	0	0	0	-1	Not_Neo																							Zm00001d038671
1421	SORBI-3002G217400	0.219218	Zm00001d020639	0.0971037	Zm00001d005826	#N/A		5	0	11	0	-0.3125	Not_Neo																							Zm00001d038672
1422	SORBI-3002G218300	0.273298	Zm00001d020646	0.229867	Zm00001d005830	0.156885	YGGT family	11	2	2	4	0.231111	Not_Neo																							Zm00001d038732
1423	SORBI-3002G218500	0.0984985	Zm00001d020647	0.0862559	Zm00001d005831	0.102122		0	14	2	0	-0.875	Not_Neo																							Zm00001d038996
1424	SORBI-3002G218600	0.0715256	Zm00001d020650	0.180808	Zm00001d005833	0.171083	C2H2-type zinc finger	0	16	0	0	-1	Not_Neo																							Zm00001d039001
1425	SORBI-3002G220300	0.189896	Zm00001d020670	0.171893	Zm00001d005875	0.293666		12	1	1	8	0.0204082	Not_Neo																							Zm00001d039002
1426	SORBI-3002G220700	0.137239	Zm00001d020675	0.302185	Zm00001d005874	0.33896		1	2	4	16	0.0816327	M1_M2																							Zm00001d039123
1427	SORBI-3002G221400	0.170622	Zm00001d020683	0.345923	Zm00001d005871	0.25326		4	3	9	1	0.171875	Not_Neo																							Zm00001d039634
1428	SORBI-3002G222200	0.184946	Zm00001d020687	0.0685662	Zm00001d005866	0.148589		5	0	11	0	-0.3125	Not_Neo																							Zm00001d039827
1429	SORBI-3002G222300	0.332333	Zm00001d020688	0.189347	Zm00001d005865	0.198748		16	0	0	0	-1	Not_Neo																							Zm00001d039866
1430	SORBI-3002G223300	0.39415	Zm00001d020695	0.307053	Zm00001d005856	0.160514		0	16	0	1	-1	Not_Neo																							Zm00001d039867
1431	SORBI-3002G223600	0.0243786	Zm00001d020697	#N/A	Zm00001d005849	#N/A		0	13	3	0	-0.8125	Not_Neo																							Zm00001d039871
1432	SORBI-3002G224200	0.0896797	Zm00001d020704	#N/A	Zm00001d005843	#N/A		0	15	0	14	-1	M2																							Zm00001d040594
1433	SORBI-3002G225000	0.112056	Zm00001d020708	#N/A	Zm00001d005881	#N/A		1	0	15	0	-0.0625	Not_Neo																							Zm00001d040596
1434	SORBI-3002G225100	0.308196	Zm00001d020711	#N/A	Zm00001d005884	#N/A		0	1	0	16	-1	M2																							Zm00001d040597
1435	SORBI-3002G225200	0.061252	Zm00001d020713	0.134335	Zm00001d005885	0.0633371		0	15	1	1	-0.9375	Not_Neo																							Zm00001d041769
1436	SORBI-3002G225300	0.115652	Zm00001d020714	0.199904	Zm00001d005888	0.312608		1	3	12	6	0.015625	Not_Neo																							Zm00001d042056
1437	SORBI-3002G225400	0.178811	Zm00001d020717	0.1677	Zm00001d005889	0.182907		1	0	1	16	-0.5	M1_M2																							Zm00001d042064
1438	SORBI-3002G226500	0.0568889	Zm00001d020723	0.205783	Zm00001d005897	0.0931404		1	12	1	2	0.0204082	Not_Neo																							Zm00001d042066
1439	SORBI-3002G227300	3.85183	Zm00001d020731	0.179657	Zm00001d005901	0.287622		0	3	1	15	-0.75	M1_M2																							Zm00001d042453
1440	SORBI-3002G227700	0.392862	Zm00001d020732	0.210008	Zm00001d005905	0.00433825		1	0	3	16	-0.25	M1																							Zm00001d042455
1441	SORBI-3002G227900	0.0678504	Zm00001d020736	0.100586	Zm00001d005905	0.00433825		15	1	0	0	0.015625	Not_Neo																							Zm00001d042461
1442	SORBI-3002G228400	0.132056	Zm00001d020741	0.073844	Zm00001d005905	0.00433825		7	4	1	11	0.694444	M1																							Zm00001d042691
1443	SORBI-3002G228900	0.123351	Zm00001d020748	0.091444	Zm00001d005912	0.160185		16	0	0	0	-1	Not_Neo																							Zm00001d042694
1444	SORBI-3002G229700	0.231506	Zm00001d020755	0.256855	Zm00001d005917	0.362942		0	14	2	0	-0.875	Not_Neo																							Zm00001d042695
1445	SORBI-3002G230000	0.263855	Zm00001d020763	0.126783	Zm00001d005919	0.107782		0	0	5	16	0	M1_M2																							Zm00001d042930
1446	SORBI-3002G230100	0.367476	Zm00001d020764	0.327108	Zm00001d005920	0.437875	Lipoxygenase	0	0	16	0	0	Not_Neo																							Zm00001d042931
1447	SORBI-3002G230500	0.175667	Zm00001d020770	0.667269	Zm00001d005924	#N/A		0	13	3	4	-0.8125	Not_Neo																							Zm00001d042955
1448	SORBI-3002G230600	0.214993	Zm00001d020771	0.211409	Zm00001d005925	0.295267		3	0	13	0	-0.1875	Not_Neo																							Zm00001d042980
1449	SORBI-3002G230900	0.158921	Zm00001d020772	0.234746	Zm00001d005928	0.254745		0	16	0	0	-1	Not_Neo																							Zm00001d042985
1450	SORBI-3002G232800	0.456971	Zm00001d020789	0.12763	Zm00001d005936	0.0774354		3	2	11	1	0.078125	Not_Neo																							Zm00001d043090
1451	SORBI-3002G232900	0.494087	Zm00001d020790	0.227952	Zm00001d005939	0.387433	Peroxidase	5	3	8	5	0.203125	Not_Neo																							Zm00001d043095
1452	SORBI-3002G233000	0.365928	Zm00001d020791	0.125656	Zm00001d005940	0.30062	Protein of unknown function (DUF1677)	0	3	10	16	-0.230769	M2																							Zm00001d043174
1453	SORBI-3002G233600	0.429639	Zm00001d020799	0.134857	Zm00001d005949	0.325225		16	0	0	0	-1	Not_Neo																							Zm00001d043252
1454	SORBI-3002G233800	0.0487457	Zm00001d020804	0.11034	Zm00001d005951	0.150677		9	0	7	1	-0.5625	Not_Neo																							Zm00001d043263
1455	SORBI-3002G233900	0.19673	Zm00001d020807	0.132198	Zm00001d005957	0.606251		16	0	0	0	-1	Not_Neo																							Zm00001d043267
1456	SORBI-3002G235500	0.119459	Zm00001d020823	0.244519	Zm00001d005962	0.211629		2	3	4	16	0.246914	M1_M2																							Zm00001d043269
1457	SORBI-3002G235700	0.121633	Zm00001d020826	0.0586635	Zm00001d005964	0.239769		11	0	5	0	-0.6875	Not_Neo																							Zm00001d043270
1458	SORBI-3002G235900	0.17767	Zm00001d020828	0.161152	Zm00001d005966	0.150126		4	7	5	0	0.390625	Not_Neo																							Zm00001d043288
1459	SORBI-3002G236600	0.233407	Zm00001d020837	0.229057	Zm00001d005970	0.245458		0	9	0	13	-1	M2																							Zm00001d043407
1460	SORBI-3002G237000	0.374709	Zm00001d020840	0.186048	Zm00001d005971	0.165334		16	0	0	0	-1	Not_Neo																							Zm00001d043410
1461	SORBI-3002G238500	0.0593452	Zm00001d020858	0.0732753	Zm00001d005976	0.118499		0	7	9	0	-0.4375	Not_Neo																							Zm00001d043420
1462	SORBI-3002G239200	0.312045	Zm00001d020861	0.0598431	Zm00001d005978	0.126864		0	16	0	0	-1	Not_Neo																							Zm00001d043461
1463	SORBI-3002G239700	0.142438	Zm00001d020862	0.104452	Zm00001d005986	0.0981677		1	0	15	0	-0.0625	Not_Neo																							Zm00001d043468
1464	SORBI-3002G241000	0.188375	Zm00001d020871	0.238599	Zm00001d005984	0.434919		4	0	5	16	-0.444444	M1_M2																							Zm00001d043665
1465	SORBI-3002G241400	9.95087e-05	Zm00001d020872	0.0695837	Zm00001d005989	0.110118		2	1	13	0	0.015625	Not_Neo																							Zm00001d043686
1466	SORBI-3002G241500	8.91524e-05	Zm00001d020874	0.0556898	Zm00001d005993	0.697923		16	0	0	0	-1	Not_Neo																							Zm00001d043691
1467	SORBI-3002G242000	0.135456	Zm00001d020877	0.097311	Zm00001d005996	0.535868		0	3	0	16	-1	M2																							Zm00001d043692
1468	SORBI-3002G242200	0.283552	Zm00001d020879	0.504825	Zm00001d005997	0.426293		0	9	7	0	-0.5625	Not_Neo																							Zm00001d043700
1469	SORBI-3002G242500	0.2135	Zm00001d020881	0.672858	Zm00001d006001	0.463147		0	15	1	0	-0.9375	Not_Neo																							Zm00001d043738
1470	SORBI-3002G243200	#N/A	Zm00001d020898	#N/A	Zm00001d006008	#N/A		0	16	0	0	-1	Not_Neo																							Zm00001d043801
1471	SORBI-3002G243500	#N/A	Zm00001d020898	#N/A	Zm00001d006008	#N/A		0	16	0	0	-1	Not_Neo																							Zm00001d043805
1472	SORBI-3002G244300	0.0594655	Zm00001d020903	0.121648	Zm00001d006009	0.216018		16	0	0	0	-1	Not_Neo																							Zm00001d043806
1473	SORBI-3002G245800	0.117961	Zm00001d020926	0.120031	Zm00001d006016	0.131426		0	15	1	0	-0.9375	Not_Neo																							Zm00001d043808
1474	SORBI-3002G246600	0.175384	Zm00001d020932	0.194573	Zm00001d006022	0.338335		5	0	11	0	-0.3125	Not_Neo																							Zm00001d043809
1475	SORBI-3002G247100	0.154094	Zm00001d020937	0.11924	Zm00001d006025	0.131302		0	13	1	13	-0.928571	M2																							Zm00001d043845
1476	SORBI-3002G247800	0.178337	Zm00001d020941	0.379723	Zm00001d006028	0.257433		10	0	6	5	-0.625	Not_Neo																							Zm00001d044036
1477	SORBI-3002G248400	0.369011	Zm00001d020946	0.337671	Zm00001d006030	0.414877	Protein of unknown function (DUF1997)	0	3	13	12	-0.1875	Not_Neo																							Zm00001d044352
1478	SORBI-3002G248700	0.247928	Zm00001d020948	0.152919	Zm00001d006031	0.310867		7	3	6	0	0.265625	Not_Neo																							Zm00001d044393
1479	SORBI-3002G249000	0.378164	Zm00001d020951	0.440817	Zm00001d006034	0.311495		0	16	0	0	-1	Not_Neo																							Zm00001d044752
1480	SORBI-3002G250100	0.437014	Zm00001d020961	0.467058	Zm00001d006037	0.266619		1	0	1	16	-0.5	M1																							Zm00001d044766
1481	SORBI-3002G250400	0.0946575	Zm00001d020963	0.0929728	Zm00001d006040	0.139029	Plant protein of unknown function (DUF936)	8	0	8	0	-0.5	Not_Neo																							Zm00001d044768
1482	SORBI-3002G250550	0.473943	Zm00001d020965	0.822098	Zm00001d006041	0.61708		15	0	1	0	-0.9375	Not_Neo																							Zm00001d044769
1483	SORBI-3002G252100	0.361484	Zm00001d020975	0.248616	Zm00001d006046	0.39303		0	5	11	0	-0.3125	Not_Neo																							Zm00001d044812
1484	SORBI-3002G253900	0.177226	Zm00001d020986	0.229483	Zm00001d006057	0.196187		0	16	0	0	-1	Not_Neo																							Zm00001d044864
1485	SORBI-3002G254200	0.10476	Zm00001d021006	0.167683	Zm00001d006059	0.144428		6	0	10	0	-0.375	Not_Neo																							Zm00001d045102
1486	SORBI-3002G254300	993.381	Zm00001d021010	0.00777382	Zm00001d006060	0.280452	XYPPX repeat (two copies)	15	1	0	0	0.015625	Not_Neo																							Zm00001d045108
1487	SORBI-3002G255100	0	Zm00001d021018	0.00997068	Zm00001d006064	0.00793242		14	0	2	0	-0.875	Not_Neo																							Zm00001d045109
1488	SORBI-3002G255200	0.169612	Zm00001d021019	0.193982	Zm00001d006065	0.222568		16	0	0	0	-1	Not_Neo																							Zm00001d045124
1489	SORBI-3002G255300	0.0242928	Zm00001d021020	9.79816e-05	Zm00001d006064	0.00793242	2Fe-2S iron-sulfur cluster binding domain	0	0	16	0	0	Not_Neo																							Zm00001d045427
1490	SORBI-3002G255500	0.619415	Zm00001d021023	1.07499	Zm00001d006066	1.05271		15	0	1	0	-0.9375	Not_Neo																							Zm00001d046073
1491	SORBI-3002G255700	0.242595	Zm00001d021025	0.1254	Zm00001d006069	0.159816		0	0	1	16	0	M1_M2																							Zm00001d047207
1492	SORBI-3002G256000	0.36504	Zm00001d021025	0.1254	Zm00001d006069	0.159816		11	4	1	5	0.578125	Not_Neo																							Zm00001d047208
1493	SORBI-3002G256300	0.878599	Zm00001d021032	0.200641	Zm00001d006070	1.00935		1	1	14	0	0.015625	Not_Neo																							Zm00001d047255
1494	SORBI-3002G256400	0.772802	Zm00001d021035	#N/A	Zm00001d006071	#N/A		0	10	0	16	-1	M2																							Zm00001d047464
1495	SORBI-3002G256601	0.208289	Zm00001d021038	#N/A	Zm00001d006078	#N/A		13	0	3	6	-0.8125	Not_Neo																							Zm00001d047465
1496	SORBI-3002G256800	0.0211083	Zm00001d021046	0.167718	Zm00001d006080	0.610902	SacI homology domain	16	0	0	0	-1	Not_Neo																							Zm00001d047466
1497	SORBI-3002G256900	0.421437	Zm00001d021046	0.167718	Zm00001d006080	0.610902	SacI homology domain	16	0	0	0	-1	Not_Neo																							Zm00001d047468
1498	SORBI-3002G257400	0.0341001	Zm00001d021051	0.526665	Zm00001d006085	0.090119		0	0	16	0	0	Not_Neo																							Zm00001d047469
1499	SORBI-3002G257750	1.06026	Zm00001d021054	0.810697	Zm00001d006090	0.706393		0	9	1	15	-0.9	M2																							Zm00001d047555
1500	SORBI-3002G257900	0.106581	Zm00001d021056	0.271936	Zm00001d006091	0.264244		3	2	3	16	0.3125	M1_M2																							Zm00001d047560
1501	SORBI-3002G258000	0.0501771	Zm00001d021057	0.260349	Zm00001d006094	0.0426683		8	0	0	15	-1	M1																							Zm00001d047744
1502	SORBI-3002G258100	0.176637	Zm00001d021058	0.0995597	Zm00001d006096	0.21561		0	16	0	0	-1	Not_Neo																							Zm00001d047754
1503	SORBI-3002G258600	0.714831	Zm00001d021060	0.450674	Zm00001d006099	0.537755	Aspartic acid proteinase inhibitor	9	2	2	14	0.260355	M1_M2																							Zm00001d047755
1504	SORBI-3002G258800	0.37121	Zm00001d021061	0.0360338	Zm00001d006100	0.0217553		0	0	16	0	0	Not_Neo																							Zm00001d047757
1505	SORBI-3002G259000	0.0848204	Zm00001d021061	0.0360338	Zm00001d006100	0.0217553		0	0	16	0	0	Not_Neo																							Zm00001d047758
1506	SORBI-3002G259400	0.149915	Zm00001d021065	0.187468	Zm00001d006102	0.312332		0	0	16	0	0	Not_Neo																							Zm00001d047759
1507	SORBI-3002G259600	0.519894	Zm00001d021069	0.344855	Zm00001d006106	0.408499		4	3	9	7	0.171875	Not_Neo																							Zm00001d047761
1508	SORBI-3002G259700	0.000105417	Zm00001d021070	0.00010929	Zm00001d006107	0.0759832	Thymidine kinase	0	0	16	0	0	Not_Neo																							Zm00001d047786
1509	SORBI-3002G259800	0.0930615	Zm00001d021071	0.25095	Zm00001d006108	0.37649		2	0	14	0	-0.125	Not_Neo																							Zm00001d047787
1510	SORBI-3002G261900	0.210188	Zm00001d021123	0.178569	Zm00001d006112	0.16716		13	0	3	0	-0.8125	Not_Neo																							Zm00001d047788
1511	SORBI-3002G262100	#N/A	Zm00001d021127	#N/A	Zm00001d006113	#N/A		0	0	16	0	0	Not_Neo																							Zm00001d047885
1512	SORBI-3002G263100	0.0632151	Zm00001d021141	0.34899	Zm00001d006119	#N/A		0	0	16	0	0	Not_Neo																							Zm00001d047886
1513	SORBI-3002G263800	0.157954	Zm00001d021147	0.11038	Zm00001d006125	0.0262596		2	0	14	0	-0.125	Not_Neo																							Zm00001d047887
1514	SORBI-3002G265200	0.213238	Zm00001d021173	0.209252	Zm00001d006132	0.30763		1	7	6	8	0.0204082	M1_M2																							Zm00001d047888
1515	SORBI-3002G264600	0.132918	Zm00001d021180	0.260966	Zm00001d006131	0.727483		1	0	15	0	-0.0625	Not_Neo																							Zm00001d047921
1516	SORBI-3002G264500	0.218166	Zm00001d021181	0.220009	Zm00001d006130	0.18887		0	8	8	0	-0.5	Not_Neo																							Zm00001d047937
1517	SORBI-3002G264100	0.0995658	Zm00001d021189	0.242608	Zm00001d006127	0.281275		0	16	0	0	-1	Not_Neo																							Zm00001d047938
1518	SORBI-3002G267800	0.200369	Zm00001d021192	0.757734	Zm00001d006158	0.282163		4	10	2	2	0.53125	Not_Neo																							Zm00001d047939
1519	SORBI-3002G268100	0.164615	Zm00001d021196	0.134755	Zm00001d006160	0.15528	AP2 domain	0	0	16	0	0	Not_Neo																							Zm00001d047995
1520	SORBI-3002G268200	0.119187	Zm00001d021197	0.0715919	Zm00001d006161	0.188824		5	0	0	16	-1	M1																							Zm00001d048218
1521	SORBI-3002G268400	#N/A	Zm00001d021199	#N/A	Zm00001d006162	#N/A		1	12	3	0	0.015625	Not_Neo																							Zm00001d048220
1522	SORBI-3002G268700	0.0285274	Zm00001d021201	#N/A	Zm00001d006166	#N/A		0	0	16	0	0	Not_Neo																							Zm00001d048230
1523	SORBI-3002G268800	0.136641	Zm00001d021203	#N/A	Zm00001d006167	#N/A		0	15	1	0	-0.9375	Not_Neo																							Zm00001d048434
1524	SORBI-3002G268900	0.218576	Zm00001d021204	0.220069	Zm00001d006168	0.251398		1	1	14	1	0.015625	Not_Neo																							Zm00001d048460
1525	SORBI-3002G269100	0.614142	Zm00001d021205	0.188447	Zm00001d006169	0.153258		0	0	0	16	NA	M1																							Zm00001d048480
1526	SORBI-3002G269032	0.293091	Zm00001d021207	0.194072	Zm00001d006169	0.153258		0	1	1	16	-0.5	M2																							Zm00001d048481
1527	SORBI-3002G269300	0.0933269	Zm00001d021207	0.194072	Zm00001d006170	0.216472		0	9	0	16	-1	M2																							Zm00001d048667
1528	SORBI-3002G269500	0.138076	Zm00001d021207	0.194072	Zm00001d006170	0.216472		0	0	0	16	NA	M2																							Zm00001d049252
1529	SORBI-3002G269400	0.0561023	Zm00001d021208	0.320324	Zm00001d006170	0.216472		7	0	5	15	-0.583333	M1																							Zm00001d049324
1530	SORBI-3002G270500	0.337333	Zm00001d021227	0.32971	Zm00001d006176	#N/A		16	0	0	0	-1	Not_Neo																							Zm00001d049399
1531	SORBI-3002G270700	0.23909	Zm00001d021231	0.141463	Zm00001d006179	#N/A		10	0	0	15	-1	M1																							Zm00001d049525
1532	SORBI-3002G272600	0.0699939	Zm00001d021240	0.178442	Zm00001d006192	0.144734	Hydantoinase B/oxoprolinase	1	1	14	0	0.015625	Not_Neo																							Zm00001d049556
1533	SORBI-3002G272400	0.373478	Zm00001d021241	0.524127	Zm00001d006184	#N/A		16	0	0	3	-1	Not_Neo																							Zm00001d049815
1534	SORBI-3002G271300	0.0691836	Zm00001d021248	0.0972949	Zm00001d006180	#N/A	AP2 domain	15	0	1	0	-0.9375	Not_Neo																							Zm00001d049822
1535	SORBI-3002G272800	9.9276e-05	Zm00001d021267	0.0692759	Zm00001d006194	0.215028		4	0	12	0	-0.25	Not_Neo																							Zm00001d049860
1536	SORBI-3002G272900	0.0336193	Zm00001d021268	0.117108	Zm00001d006195	0.30254		2	0	14	0	-0.125	Not_Neo																							Zm00001d049880
1537	SORBI-3002G273100	0.0472899	Zm00001d021269	0.352364	Zm00001d006196	0.0514924		16	0	0	0	-1	Not_Neo																							Zm00001d049886
1538	SORBI-3002G273300	0.150778	Zm00001d021278	0.173672	Zm00001d006198	0.151911		0	16	0	0	-1	Not_Neo																							Zm00001d049889
1539	SORBI-3002G273900	0.15677	Zm00001d021282	0.458376	Zm00001d006204	0.372057		15	0	1	0	-0.9375	Not_Neo																							Zm00001d049894
1540	SORBI-3002G274000	0.169347	Zm00001d021283	0.220146	Zm00001d006205	0.142324		11	0	5	1	-0.6875	Not_Neo																							Zm00001d049903
1541	SORBI-3002G274500	1020.47	Zm00001d021285	0.18709	Zm00001d006209	0.167234		0	0	2	16	0	M1																							Zm00001d050016
1542	SORBI-3002G274700	0.209073	Zm00001d021287	0.278983	Zm00001d006210	0.498248		16	0	0	0	-1	Not_Neo																							Zm00001d050017
1543	SORBI-3002G274800	0.255107	Zm00001d021288	0.240709	Zm00001d006211	0.118337		0	14	1	10	-0.933333	M2																							Zm00001d050018
1544	SORBI-3002G275100	0.286215	Zm00001d021291	0.370281	Zm00001d006212	0.428927		0	9	7	1	-0.5625	Not_Neo																							Zm00001d050020
1545	SORBI-3002G276000	0.000102832	Zm00001d021300	0.0490717	Zm00001d006213	0.192255	60Kd inner membrane protein	0	5	11	0	-0.3125	Not_Neo																							Zm00001d050251
1546	SORBI-3002G276100	0.060122	Zm00001d021301	0.220333	Zm00001d006214	987.733		16	0	0	0	-1	Not_Neo																							Zm00001d050253
1547	SORBI-3002G276400	0.297785	Zm00001d021303	0.260955	Zm00001d006217	0.159952		14	0	2	2	-0.875	Not_Neo																							Zm00001d050645
1548	SORBI-3002G276800	0.0252806	Zm00001d021306	0.0518579	Zm00001d006219	0.111193		12	0	4	0	-0.75	Not_Neo																							Zm00001d050645
1549	SORBI-3002G276900	0.0607829	Zm00001d021309	0.182734	Zm00001d006220	0.499458		0	0	16	0	0	Not_Neo																							Zm00001d051329
1550	SORBI-3002G277100	0.265725	Zm00001d021310	0.291889	Zm00001d006221	0.231051	Alpha/beta hydrolase family	0	2	14	0	-0.125	Not_Neo																							Zm00001d051507
1551	SORBI-3002G277300	0.0719817	Zm00001d021314	0.399491	Zm00001d006226	0.258154		16	0	0	0	-1	Not_Neo																							Zm00001d051589
1552	SORBI-3002G277900	0.0810399	Zm00001d021318	0.130115	Zm00001d006231	0.155184		16	0	0	1	-1	Not_Neo																							Zm00001d051609
1553	SORBI-3002G299800	0.136213	Zm00001d021341	0.146411	Zm00001d006358	0.139877		0	16	0	0	-1	Not_Neo																							Zm00001d051611
1554	SORBI-3002G299600	0.65075	Zm00001d021342	0.319535	Zm00001d006355	0.490515		7	0	9	0	-0.4375	Not_Neo																							Zm00001d051620
1555	SORBI-3002G299200	0.312541	Zm00001d021345	0.525606	Zm00001d006351	0.266514		0	3	1	16	-0.75	M1_M2																							Zm00001d051627
1556	SORBI-3002G299000	0.254171	Zm00001d021347	0.216979	Zm00001d006350	0.433424	Glycosyl transferase family 8	3	0	13	0	-0.1875	Not_Neo																							Zm00001d051804
1557	SORBI-3002G297800	0.168133	Zm00001d021362	0.335423	Zm00001d006348	0.214614		2	0	14	0	-0.125	Not_Neo																							Zm00001d051966
1558	SORBI-3002G297700	0.193863	Zm00001d021363	0.130988	Zm00001d006347	0.58997		3	0	13	0	-0.1875	Not_Neo																							Zm00001d052020
1559	SORBI-3002G296200	0	Zm00001d021375	0.00195091	Zm00001d006336	0.00010247		3	0	13	0	-0.1875	Not_Neo																							Zm00001d052021
1560	SORBI-3002G294700	0.220838	Zm00001d021389	0.349924	Zm00001d006331	0.167584		9	0	7	0	-0.5625	Not_Neo																							Zm00001d052076
1561	SORBI-3002G294200	0.199896	Zm00001d021392	0.0789561	Zm00001d006328	0.162517		16	0	0	0	-1	Not_Neo																							Zm00001d052197
1562	SORBI-3002G293800	0.0478767	Zm00001d021395	0.368842	Zm00001d006324	0.27653		2	1	13	0	0.015625	Not_Neo																							Zm00001d052545
1563	SORBI-3002G293200	0.0694069	Zm00001d021401	0.089614	Zm00001d006320	0.0599687	Weak chloroplast movement under blue light	0	0	16	0	0	Not_Neo																							Zm00001d052551
1564	SORBI-3002G292900	0.22159	Zm00001d021404	0.306921	Zm00001d006317	0.417137		0	3	13	0	-0.1875	Not_Neo																							Zm00001d052813
1565	SORBI-3002G291500	#N/A	Zm00001d021418	#N/A	Zm00001d006312	#N/A		15	0	1	0	-0.9375	Not_Neo																							Zm00001d052948
1566	SORBI-3002G291400	0.990705	Zm00001d021419	0.381461	Zm00001d006311	0.185012		0	16	0	0	-1	Not_Neo																							Zm00001d053059
1567	SORBI-3002G291300	9.74412e-05	Zm00001d021420	0.14594	Zm00001d006310	0.38512		5	0	11	0	-0.3125	Not_Neo																							Zm00001d053080
1568	SORBI-3002G291200	0.236011	Zm00001d021421	0.137552	Zm00001d006309	#N/A		16	0	0	0	-1	Not_Neo																							Zm00001d053112
1569	SORBI-3002G290300	#N/A	Zm00001d021426	#N/A	Zm00001d006307	#N/A		7	0	9	0	-0.4375	Not_Neo																							Zm00001d053208
1570	SORBI-3002G289800	0.305653	Zm00001d021433	0.0644773	Zm00001d006306	0.061577		16	0	0	0	-1	Not_Neo																							Zm00001d053695
1571	SORBI-3002G288000	0.349836	Zm00001d021438	0.401815	Zm00001d006295	0.542141		0	0	16	1	0	Not_Neo
1572	SORBI-3002G287500	0.0212774	Zm00001d021441	0.0705952	Zm00001d006294	0.26576		0	13	3	3	-0.8125	Not_Neo
1573	SORBI-3002G287400	0.178962	Zm00001d021442	0.204788	Zm00001d006293	0.330203		16	0	0	0	-1	Not_Neo
1574	SORBI-3002G286900	#N/A	Zm00001d021445	#N/A	Zm00001d006287	#N/A		13	0	3	0	-0.8125	Not_Neo
1575	SORBI-3002G286200	0.287008	Zm00001d021452	0.143208	Zm00001d006286	0.154949		5	0	11	1	-0.3125	Not_Neo
1576	SORBI-3002G285200	0.262162	Zm00001d021456	0.163065	Zm00001d006274	0.245487		0	0	0	16	NA	M2
1577	SORBI-3002G285300	0.102009	Zm00001d021456	0.163065	Zm00001d006274	0.245487		0	6	0	16	-1	M2
1578	SORBI-3002G285450	0.236285	Zm00001d021456	0.163065	Zm00001d006274	0.245487		0	1	0	16	-1	M2
1579	SORBI-3002G285700	0.211523	Zm00001d021456	0.163065	Zm00001d006274	0.245487		0	6	0	15	-1	M2
1580	SORBI-3002G284901	0.201766	Zm00001d021457	0.405849	Zm00001d006282	0.14196		0	0	2	16	0	M1_M2
1581	SORBI-3002G284200	0.38966	Zm00001d021462	0.205905	Zm00001d006270	0.136563	Protein tyrosine kinase	0	15	0	2	-1	M2
1582	SORBI-3002G284400	0.386194	Zm00001d021462	0.205905	Zm00001d006270	0.136563	Protein tyrosine kinase	0	11	0	14	-1	M2
1583	SORBI-3002G284100	0.110146	Zm00001d021464	0.140675	Zm00001d006269	0.0821401		12	0	4	0	-0.75	Not_Neo
1584	SORBI-3002G283300	0.251944	Zm00001d021473	0.121228	Zm00001d006267	0.176306		7	1	8	0	0.015625	Not_Neo
1585	SORBI-3002G303300	0.244414	Zm00001d021494	0.0611689	Zm00001d006371	0.0950719		6	1	7	9	0.0204082	M1
1586	SORBI-3002G303500	9.84428e-05	Zm00001d021497	0.0746477	Zm00001d006372	0.0806731		0	0	2	16	0	M1_M2
1587	SORBI-3002G303600	0.177419	Zm00001d021498	0.264158	Zm00001d006373	0.285541		1	0	15	0	-0.0625	Not_Neo
1588	SORBI-3002G304100	0.146564	Zm00001d021507	0.0521912	Zm00001d006377	0.0625725		0	2	14	0	-0.125	Not_Neo
1589	SORBI-3002G304900	0.0412272	Zm00001d021508	0.015025	Zm00001d006388	0.000102436		0	4	12	0	-0.25	Not_Neo
1590	SORBI-3002G305000	0.256647	Zm00001d021512	0.513057	Zm00001d006389	0.327423		6	0	10	0	-0.375	Not_Neo
1591	SORBI-3002G306100	0.0907778	Zm00001d021517	0.37267	Zm00001d006402	0.462035		0	6	10	0	-0.375	Not_Neo
1592	SORBI-3002G306300	0.148702	Zm00001d021519	0.0722517	Zm00001d006408	0.175611		1	2	13	0	0.015625	Not_Neo
1593	SORBI-3002G306400	0.0934305	Zm00001d021520	0.379694	Zm00001d006409	0.32507	KH domain	15	0	1	0	-0.9375	Not_Neo
1594	SORBI-3002G306600	0.000107591	Zm00001d021522	0.174281	Zm00001d006410	0.116766	Transferase family	0	0	16	0	0	Not_Neo
1595	SORBI-3002G306700	0.2675	Zm00001d021524	0.620767	Zm00001d006415	0.427514		3	1	12	0	0.015625	Not_Neo
1596	SORBI-3002G307800	0.336976	Zm00001d021532	0.281692	Zm00001d006417	0.459685		6	1	9	12	0.015625	Not_Neo
1597	SORBI-3002G308000	0.265438	Zm00001d021534	0.270785	Zm00001d006419	0.655051		14	0	1	2	-0.933333	M1
1598	SORBI-3002G308300	9.82765e-05	Zm00001d021536	0.567851	Zm00001d006421	0.638554		10	0	6	0	-0.625	Not_Neo
1599	SORBI-3002G308700	0.254655	Zm00001d021541	0.360318	Zm00001d006428	1.07983		0	0	16	0	0	Not_Neo
1600	SORBI-3002G309500	9.4043e-05	Zm00001d021551	0.0451742	Zm00001d006433	9.58957e-05		0	0	16	0	0	Not_Neo
1601	SORBI-3002G309600	0.0658082	Zm00001d021553	0.140412	Zm00001d006438	0.144468		0	11	5	0	-0.6875	Not_Neo
1602	SORBI-3002G309700	0.335219	Zm00001d021554	0.0944419	Zm00001d006439	0.131851		0	0	16	0	0	Not_Neo
1603	SORBI-3002G309800	0.0818365	Zm00001d021557	0.0849374	Zm00001d006440	0.16467	Pyridoxal-dependent decarboxylase conserved domain	0	0	16	0	0	Not_Neo
1604	SORBI-3002G311501	0.213763	Zm00001d021571	0.0851777	Zm00001d006449	0.121952		10	2	3	1	0.213333	Not_Neo
1605	SORBI-3002G311601	0.254193	Zm00001d021571	0.0851777	Zm00001d006449	0.121952		6	1	3	13	0.04	M1_M2
1606	SORBI-3002G311700	0.127409	Zm00001d021571	0.0851777	Zm00001d006449	0.121952		6	1	3	16	0.04	M1_M2
1607	SORBI-3002G312200	0.22106	Zm00001d021573	0.451325	Zm00001d006451	0.219152		0	0	3	16	0	M1
1608	SORBI-3002G312300	0.123555	Zm00001d021573	0.451325	Zm00001d006451	0.219152		0	0	3	16	0	M1
1609	SORBI-3002G312400	0.316191	Zm00001d021574	0.0907729	Zm00001d006453	0.327577		16	0	0	0	-1	Not_Neo
1610	SORBI-3002G311300	0.249335	Zm00001d021576	0.0806643	Zm00001d006450	0.137206	Uroporphyrinogen-III synthase HemD	16	0	0	7	-1	Not_Neo
1611	SORBI-3002G311400	0.124002	Zm00001d021577	0.0563257	Zm00001d006450	0.137206	Uroporphyrinogen-III synthase HemD	5	3	1	16	0.641975	Not_Neo
1612	SORBI-3002G312700	0.196776	Zm00001d021579	0.207168	Zm00001d006454	0.250348		12	1	3	5	0.015625	Not_Neo
1613	SORBI-3002G312800	0.247136	Zm00001d021580	0.441468	Zm00001d006455	0.255067	Ulp1 protease family, C-terminal catalytic domain	0	5	11	0	-0.3125	Not_Neo
1614	SORBI-3002G313000	0.44908	Zm00001d021583	0.230135	Zm00001d006456	0.555261		0	0	16	0	0	Not_Neo
1615	SORBI-3002G313500	0.813225	Zm00001d021587	0.155504	Zm00001d006460	0.517721	DEAD/DEAH box helicase	15	0	1	0	-0.9375	Not_Neo
1616	SORBI-3002G313800	0.230857	Zm00001d021591	0.151214	Zm00001d006463	0.222932		0	14	2	0	-0.875	Not_Neo
1617	SORBI-3002G314200	0.0349148	Zm00001d021595	0.0445139	Zm00001d006466	#N/A		1	10	3	2	0.0204082	Not_Neo
1618	SORBI-3002G314300	0.0711317	Zm00001d021596	0.076846	Zm00001d006467	0.0852355		15	0	1	0	-0.9375	Not_Neo
1619	SORBI-3002G315200	0.305029	Zm00001d021609	0.435501	Zm00001d006472	0.853633		0	0	16	0	0	Not_Neo
1620	SORBI-3002G315400	0.607788	Zm00001d021610	0.608359	Zm00001d006473	0.508758	Glutathione S-transferase, C-terminal domain	0	9	7	0	-0.5625	Not_Neo
1621	SORBI-3002G317300	0.213502	Zm00001d021623	0.000101614	Zm00001d006479	0.116034		2	0	14	0	-0.125	Not_Neo
1622	SORBI-3002G318000	0.04238	Zm00001d021627	0.144493	Zm00001d006489	0.149747		0	5	11	0	-0.3125	Not_Neo
1623	SORBI-3002G318300	0.0448323	Zm00001d021629	0.00367534	Zm00001d006494	0.129515		16	0	0	0	-1	Not_Neo
1624	SORBI-3002G318501	0.915928	Zm00001d021632	0.302427	Zm00001d006495	0.365496		11	0	4	8	-0.733333	M1
1625	SORBI-3002G318600	0.340121	Zm00001d021633	0.441568	Zm00001d006496	0.24462		0	1	15	0	-0.0625	Not_Neo
1626	SORBI-3002G319200	0.577519	Zm00001d021635	0.491058	Zm00001d006499	0.51804		0	0	16	0	0	Not_Neo
1627	SORBI-3002G320200	0.138034	Zm00001d021639	0.118109	Zm00001d006503	0.0895958		4	7	1	16	0.694444	Not_Neo
1628	SORBI-3002G320600	0.209359	Zm00001d021641	0.391404	Zm00001d006504	0.322605		0	5	11	0	-0.3125	Not_Neo
1629	SORBI-3002G320900	0.0656886	Zm00001d021646	0.141811	Zm00001d006507	0.297939		0	0	16	0	0	Not_Neo
1630	SORBI-3002G321500	0.0415666	Zm00001d021649	0.293574	Zm00001d006509	0.337278		0	5	11	0	-0.3125	Not_Neo
1631	SORBI-3002G321800	#N/A	Zm00001d021652	#N/A	Zm00001d006510	#N/A	Modifier of rudimentary (Mod(r)) protein	0	0	16	16	0	Not_Neo
1632	SORBI-3002G322000	0.109824	Zm00001d021653	0.0275758	Zm00001d006511	0.0166095		12	0	0	11	-1	M1
1633	SORBI-3002G323000	0.159049	Zm00001d021659	0.0797075	Zm00001d006517	0.139455		8	0	7	12	-0.533333	M1
1634	SORBI-3002G324400	0.562725	Zm00001d021672	0.691201	Zm00001d006520	0.253231	Type II intron maturase	2	0	3	16	-0.4	M1
1635	SORBI-3002G324500	0.4301	Zm00001d021672	0.691201	Zm00001d006520	0.253231	Type II intron maturase	1	0	3	16	-0.25	M1
1636	SORBI-3002G324700	1.13406	Zm00001d021672	0.691201	Zm00001d006520	0.253231	Type II intron maturase	13	0	3	7	-0.8125	Not_Neo
1637	SORBI-3002G324801	0.46906	Zm00001d021673	#N/A	Zm00001d006521	#N/A		15	0	1	0	-0.9375	Not_Neo
1638	SORBI-3002G325200	0.127863	Zm00001d021674	0.0958038	Zm00001d006524	0.140365		13	0	0	14	-1	M1
1639	SORBI-3002G326000	0.106432	Zm00001d021677	0.132973	Zm00001d006525	0.0545091		9	0	0	11	-1	M1
1640	SORBI-3002G326100	0.248581	Zm00001d021677	0.132973	Zm00001d006526	0.205679		12	0	0	9	-1	M1
1641	SORBI-3002G326200	0.0250026	Zm00001d021679	999.088	Zm00001d006527	0.298771		4	0	0	16	-1	M1_M2
1642	SORBI-3002G327800	0.22218	Zm00001d021689	0.151212	Zm00001d006535	0.171869		0	0	0	16	NA	M1
1643	SORBI-3002G328400	0.15812	Zm00001d021689	0.151212	Zm00001d006535	0.171869		14	0	0	6	-1	M1
1644	SORBI-3002G328900	0.130776	Zm00001d021689	0.151212	Zm00001d006535	0.171869		1	0	0	15	-1	M1
1645	SORBI-3002G327900	0.166744	Zm00001d021690	0.11693	Zm00001d006538	0.322968	Glutathione S-transferase, N-terminal domain	0	0	6	16	0	M1_M2
1646	SORBI-3002G328200	0.297996	Zm00001d021690	0.11693	Zm00001d006538	0.322968	Glutathione S-transferase, N-terminal domain	9	0	6	14	-0.6	M2
1647	SORBI-3002G328300	0.209721	Zm00001d021690	0.11693	Zm00001d006538	0.322968	Glutathione S-transferase, N-terminal domain	9	1	6	0	0.015625	Not_Neo
1648	SORBI-3002G328600	0.19287	Zm00001d021697	0.0695408	Zm00001d006538	0.322968		0	0	0	16	NA	M2
1649	SORBI-3002G329600	0.293776	Zm00001d021703	0.163254	Zm00001d006540	0.177923	CutA1 divalent ion tolerance protein	5	2	6	14	0.16568	M1_M2
1650	SORBI-3002G329700	0.000102747	Zm00001d021704	0.41583	Zm00001d006541	0.259853		16	0	0	0	-1	Not_Neo
1651	SORBI-3002G329900	0	Zm00001d021706	0.000100423	Zm00001d006547	0.000100445		0	0	16	0	0	Not_Neo
1652	SORBI-3002G330000	9.85047e-05	Zm00001d021707	9.95098e-05	Zm00001d006548	0.0103478		0	7	9	0	-0.4375	Not_Neo
1653	SORBI-3002G330800	0.102157	Zm00001d021714	0.133017	Zm00001d006553	0.126317		0	9	7	4	-0.5625	Not_Neo
1654	SORBI-3002G332100	0.0644666	Zm00001d021718	0.235412	Zm00001d006561	0.254327		16	0	0	0	-1	Not_Neo
1655	SORBI-3002G332750	0.0310298	Zm00001d021721	0.062616	Zm00001d006565	0.257085		9	0	7	0	-0.5625	Not_Neo
1656	SORBI-3002G334500	0.0960885	Zm00001d021732	0.22697	Zm00001d006571	0.208584		0	0	0	16	NA	M2
1657	SORBI-3002G334000	0.242346	Zm00001d021736	0.138736	Zm00001d006571	0.208584		16	0	0	1	-1	Not_Neo
1658	SORBI-3002G334100	0.0800638	Zm00001d021736	0.138736	Zm00001d006571	0.208584		16	0	0	0	-1	Not_Neo
1659	SORBI-3002G334200	0.2247	Zm00001d021736	0.138736	Zm00001d006571	0.208584		16	0	0	0	-1	Not_Neo
1660	SORBI-3002G335600	0.359385	Zm00001d021741	0.346754	Zm00001d006573	0.300313		0	0	16	0	0	Not_Neo
1661	SORBI-3002G336000	0.388262	Zm00001d021746	0.147438	Zm00001d006574	0.396106		5	5	6	2	0.390625	Not_Neo
1662	SORBI-3002G337300	0.182048	Zm00001d021754	0.434714	Zm00001d006580	0.317847		0	1	15	0	-0.0625	Not_Neo
1663	SORBI-3002G337800	0.105997	Zm00001d021761	0.34995	Zm00001d006585	0.448062		7	0	1	15	-0.875	M1
1664	SORBI-3002G338000	0.0912678	Zm00001d021763	0.0752936	Zm00001d006587	#N/A		7	3	1	12	0.561983	Not_Neo
1665	SORBI-3002G338100	0.425508	Zm00001d021764	0.239194	Zm00001d006588	#N/A		1	0	15	0	-0.0625	Not_Neo
1666	SORBI-3002G338700	1042.86	Zm00001d021777	0.218402	Zm00001d006590	#N/A		7	0	9	0	-0.4375	Not_Neo
1667	SORBI-3002G339000	0.115098	Zm00001d021779	0.420144	Zm00001d006591	#N/A		0	7	9	0	-0.4375	Not_Neo
1668	SORBI-3002G339200	0.000101082	Zm00001d021784	0.0163455	Zm00001d006592	#N/A		15	0	0	15	-1	M1
1669	SORBI-3002G339300	0.224229	Zm00001d021785	0.374818	Zm00001d006593	#N/A		5	0	11	0	-0.3125	Not_Neo
1670	SORBI-3002G339500	0.39777	Zm00001d021787	0.494638	Zm00001d006595	#N/A		7	0	9	0	-0.4375	Not_Neo
1671	SORBI-3002G339666	0.98373	Zm00001d021787	0.494638	Zm00001d006595	#N/A		2	0	9	16	-0.181818	M1
1672	SORBI-3002G339732	0.821857	Zm00001d021787	0.494638	Zm00001d006595	#N/A		6	0	9	16	-0.4	M1
1673	SORBI-3002G339600	#N/A	Zm00001d021788	#N/A	Zm00001d006596	#N/A		16	0	0	0	-1	Not_Neo
1674	SORBI-3002G339800	0.262751	Zm00001d021790	0.330051	Zm00001d006597	#N/A	Heavy-metal-associated domain	8	1	7	0	0.015625	Not_Neo
1675	SORBI-3002G339900	0.319189	Zm00001d021791	0.343814	Zm00001d006601	#N/A		2	0	14	0	-0.125	Not_Neo
1676	SORBI-3002G340100	0.177282	Zm00001d021802	0.244433	Zm00001d006602	#N/A		16	0	0	0	-1	Not_Neo
1677	SORBI-3002G340350	0.941217	Zm00001d021803	0.219426	Zm00001d006603	#N/A		15	0	1	0	-0.9375	Not_Neo
1678	SORBI-3002G340700	0.0204289	Zm00001d021805	0.0875154	Zm00001d006605	0.229534		11	0	5	0	-0.6875	Not_Neo
1679	SORBI-3002G340900	0.0598721	Zm00001d021806	0.219831	Zm00001d006607	0.25224		0	0	16	0	0	Not_Neo
1680	SORBI-3002G341100	0.505591	Zm00001d021810	1.04166	Zm00001d006606	0.165212		16	0	0	2	-1	Not_Neo
1681	SORBI-3002G341300	0.149723	Zm00001d021812	0.292686	Zm00001d006608	0.3085		0	13	3	4	-0.8125	Not_Neo
1682	SORBI-3002G341800	0.0142493	Zm00001d021815	0.071818	Zm00001d006613	0.0133888		0	0	16	0	0	Not_Neo
1683	SORBI-3002G342000	0.0370811	Zm00001d021817	0.0866601	Zm00001d006614	0.105734		7	0	9	0	-0.4375	Not_Neo
1684	SORBI-3002G343300	0.225722	Zm00001d021831	0.228664	Zm00001d006619	0.0978666		3	10	3	0	0.359375	Not_Neo
1685	SORBI-3002G343400	0.248622	Zm00001d021834	0.180774	Zm00001d006620	0.140729	GRAM domain	9	0	7	0	-0.5625	Not_Neo
1686	SORBI-3002G343500	0.0790843	Zm00001d021835	0.195715	Zm00001d006621	0.12383		10	0	6	0	-0.625	Not_Neo
1687	SORBI-3002G343600	0.116952	Zm00001d021836	0.0937506	Zm00001d006623	0.121237		0	16	0	0	-1	Not_Neo
1688	SORBI-3002G344600	0.6225	Zm00001d021838	0.619848	Zm00001d006625	0.595271		0	8	8	0	-0.5	Not_Neo
1689	SORBI-3002G344700	0.192803	Zm00001d021839	0.308202	Zm00001d006626	0.258594		16	0	0	1	-1	Not_Neo
1690	SORBI-3002G346200	0.161004	Zm00001d021858	#N/A	Zm00001d006628	#N/A		0	15	1	1	-0.9375	Not_Neo
1691	SORBI-3002G347500	0.146249	Zm00001d021870	0.243549	Zm00001d006639	0.14259		0	0	7	15	0	M2
1692	SORBI-3002G348000	0.250803	Zm00001d021875	0.178437	Zm00001d006644	0.210198		7	0	9	0	-0.4375	Not_Neo
1693	SORBI-3002G348400	0.38472	Zm00001d021877	0.211967	Zm00001d006645	0.371787		0	16	0	0	-1	Not_Neo
1694	SORBI-3002G349300	9.99467e-05	Zm00001d021882	0	Zm00001d006650	7.04473e-05	Late embryogenesis abundant protein	15	0	1	0	-0.9375	Not_Neo
1695	SORBI-3002G350400	9.47393e-05	Zm00001d021891	9.67016e-05	Zm00001d006651	0.0221488		9	0	7	0	-0.5625	Not_Neo
1696	SORBI-3002G350500	0.329669	Zm00001d021892	0.137002	Zm00001d006653	0.114012		4	5	5	15	0.387755	M2
1697	SORBI-3002G351700	0.309252	Zm00001d021903	0.122659	Zm00001d006658	0.324253		9	0	7	2	-0.5625	Not_Neo
1698	SORBI-3002G352100	0.000100128	Zm00001d021906	0.0454656	Zm00001d006663	0.0447153		0	2	0	16	-1	M2
1699	SORBI-3002G352200	0.0253873	Zm00001d021908	0.0992489	Zm00001d006667	0.344446		0	0	16	0	0	Not_Neo
1700	SORBI-3002G352700	0.0986953	Zm00001d021913	0.384069	Zm00001d006670	0.183524	Ring finger domain	1	0	15	0	-0.0625	Not_Neo
1701	SORBI-3002G352800	0.358681	Zm00001d021915	0.585912	Zm00001d006673	0.234865		11	0	0	13	-1	M1
1702	SORBI-3002G353200	0.0561167	Zm00001d021927	0.09648	Zm00001d006677	0.166373		0	1	15	0	-0.0625	Not_Neo
1703	SORBI-3002G353300	0.0786606	Zm00001d021929	0.0935781	Zm00001d006678	0.0302993		0	15	1	1	-0.9375	Not_Neo
1704	SORBI-3002G353400	0.0687595	Zm00001d021930	0.0599463	Zm00001d006679	0.0617113	Glutamine amidotransferases class-II	16	0	0	0	-1	Not_Neo
1705	SORBI-3002G353500	0.00639297	Zm00001d021931	0.0706501	Zm00001d006680	0.0499563	Helix-loop-helix DNA-binding domain	0	16	0	0	-1	Not_Neo
1706	SORBI-3002G353700	0.221272	Zm00001d021932	0.284991	Zm00001d006682	0.290138		1	0	15	0	-0.0625	Not_Neo
1707	SORBI-3002G353800	0.6096	Zm00001d021934	0.323088	Zm00001d006687	0.21045		15	0	1	0	-0.9375	Not_Neo
1708	SORBI-3002G353900	0.0517142	Zm00001d021935	0.0359406	Zm00001d006688	0.0799464		15	0	1	0	-0.9375	Not_Neo
1709	SORBI-3002G354000	0.101293	Zm00001d021936	0.108591	Zm00001d006688	0.0799464		12	0	3	5	-0.8	M1
1710	SORBI-3002G354100	0.0761115	Zm00001d021938	0.161268	Zm00001d006688	0.0799464		1	0	6	16	-0.142857	M1_M2
1711	SORBI-3002G354200	0.040836	Zm00001d021942	0.0604424	Zm00001d006688	0.0799464		0	9	0	15	-1	M2
1712	SORBI-3002G354900	0.169732	Zm00001d021946	0.103751	Zm00001d006701	0.107558		9	0	7	0	-0.5625	Not_Neo
1713	SORBI-3002G355000	0.162625	Zm00001d021947	0.284832	Zm00001d006702	0.297449		0	3	13	0	-0.1875	Not_Neo
1714	SORBI-3002G355300	0.12904	Zm00001d021950	0.137563	Zm00001d006704	0.1683	Protein of unknown function, DUF604	0	0	16	0	0	Not_Neo
1715	SORBI-3002G355400	0.0154241	Zm00001d021951	0.0491008	Zm00001d006705	0.183251		16	0	0	0	-1	Not_Neo
1716	SORBI-3002G355500	0.0368767	Zm00001d021952	0.184003	Zm00001d006708	0.162343		16	0	0	0	-1	Not_Neo
1717	SORBI-3002G355800	0.0212855	Zm00001d021954	0.0586326	Zm00001d006710	0.152798		15	0	1	0	-0.9375	Not_Neo
1718	SORBI-3002G356101	0.000105048	Zm00001d021955	#N/A	Zm00001d006711	#N/A		2	0	14	0	-0.125	Not_Neo
1719	SORBI-3002G356400	#DIV/0!	Zm00001d021958	0.0488704	Zm00001d006714	0.499445		3	0	13	0	-0.1875	Not_Neo
1720	SORBI-3002G356500	0.321821	Zm00001d021959	0.190248	Zm00001d006715	0.445616		16	0	0	5	-1	Not_Neo
1721	SORBI-3002G357100	0.0239497	Zm00001d021966	#N/A	Zm00001d006717	#N/A		12	0	4	0	-0.75	Not_Neo
1722	SORBI-3002G357600	0.0477018	Zm00001d021971	0.0998835	Zm00001d006720	0.187777		16	0	0	3	-1	Not_Neo
1723	SORBI-3002G357800	0.0248827	Zm00001d021973	0.116883	Zm00001d006721	0.142919		8	2	2	0	0.277778	Not_Neo
1724	SORBI-3002G357900	0.154547	Zm00001d021974	0.0763924	Zm00001d006722	0.111469		13	0	3	0	-0.8125	Not_Neo
1725	SORBI-3002G358600	0.0132606	Zm00001d021978	0.0360704	Zm00001d006726	0.108077		16	0	0	0	-1	Not_Neo
1726	SORBI-3002G358800	0.115541	Zm00001d021979	0.137295	Zm00001d006731	0.56876		1	2	13	0	0.015625	Not_Neo
1727	SORBI-3002G359400	#N/A	Zm00001d021993	#N/A	Zm00001d006737	#N/A		0	14	2	0	-0.875	Not_Neo
1728	SORBI-3002G359700	0.235239	Zm00001d021995	#N/A	Zm00001d006739	#N/A		16	0	0	2	-1	Not_Neo
1729	SORBI-3002G359800	0.0227302	Zm00001d021998	0.0996715	Zm00001d006744	0.0466467		4	3	7	14	0.22449	Not_Neo
1730	SORBI-3002G360000	0.108315	Zm00001d022001	0.216354	Zm00001d006746	0.195153		0	0	0	16	NA	M1_M2
1731	SORBI-3002G360500	0.0430585	Zm00001d022006	0.0864068	Zm00001d006749	0.168689		2	5	9	0	0.109375	Not_Neo
1732	SORBI-3002G361300	0.20818	Zm00001d022010	0.331226	Zm00001d006751	0.21233	Putative S-adenosyl-L-methionine-dependent methyltransferase	1	1	14	0	0.015625	Not_Neo
1733	SORBI-3002G361400	0.252745	Zm00001d022016	0.383966	Zm00001d006752	0.286718		16	0	0	0	-1	Not_Neo
1734	SORBI-3002G361500	0.094453	Zm00001d022017	0.0705448	Zm00001d006753	0.119664		0	14	2	0	-0.875	Not_Neo
1735	SORBI-3002G361900	0.461214	Zm00001d022025	0.164229	Zm00001d006756	0.312423		0	12	4	0	-0.75	Not_Neo
1736	SORBI-3002G362700	0.113941	Zm00001d022038	0.252587	Zm00001d006757	0.282331		3	0	13	0	-0.1875	Not_Neo
1737	SORBI-3002G362800	0.151837	Zm00001d022040	0.257301	Zm00001d006758	0.338957	CAAD domains of cyanobacterial aminoacyl-tRNA synthetase	0	16	0	0	-1	Not_Neo
1738	SORBI-3002G362900	0.153051	Zm00001d022041	0.196849	Zm00001d006759	0.282896		3	0	13	0	-0.1875	Not_Neo
1739	SORBI-3002G363100	0.0908913	Zm00001d022042	0.0508348	Zm00001d006760	0.0368434	Zinc-binding dehydrogenase	0	0	16	0	0	Not_Neo
1740	SORBI-3002G364900	0.472542	Zm00001d022049	0.426001	Zm00001d006769	0.173563		0	0	16	0	0	Not_Neo
1741	SORBI-3002G365100	0.258603	Zm00001d022050	0.187979	Zm00001d006771	0.0944096	Peroxidase	0	8	8	0	-0.5	Not_Neo
1742	SORBI-3002G367300	0.336466	Zm00001d022072	0.471302	Zm00001d006828	0.233286		0	12	4	0	-0.75	Not_Neo
1743	SORBI-3002G367400	0.101556	Zm00001d022073	0.0948951	Zm00001d006825	0.105956		1	3	12	1	0.015625	Not_Neo
1744	SORBI-3002G368400	0.0265376	Zm00001d022083	0.036831	Zm00001d006821	0.0684474		16	0	0	0	-1	Not_Neo
1745	SORBI-3002G368600	0.079237	Zm00001d022085	0.0341964	Zm00001d006820	0.318017		16	0	0	0	-1	Not_Neo
1746	SORBI-3002G369800	0.043125	Zm00001d022099	0.13373	Zm00001d006813	0.225515		4	2	1	16	0.489796	M1
1747	SORBI-3002G370100	0.0429733	Zm00001d022102	0.158654	Zm00001d006810	0.343485		2	0	14	0	-0.125	Not_Neo
1748	SORBI-3002G370600	0.199488	Zm00001d022107	0.0745451	Zm00001d006833	0.208827		15	1	0	10	0.015625	Not_Neo
1749	SORBI-3002G370700	0.0888431	Zm00001d022108	0.123445	Zm00001d006834	0.186512		0	5	11	0	-0.3125	Not_Neo
1750	SORBI-3002G370800	0.44206	Zm00001d022109	0.419524	Zm00001d006835	0.411101		0	14	0	16	-1	M2
1751	SORBI-3002G371100	0.00876235	Zm00001d022111	0.0300527	Zm00001d006838	#N/A		16	0	0	0	-1	Not_Neo
1752	SORBI-3002G372200	0.118116	Zm00001d022120	0.0766086	Zm00001d006841	0.156306	Protein of unknown function (DUF1084)	2	7	0	16	0.444444	M2
1753	SORBI-3002G372500	0.226663	Zm00001d022125	0.210588	Zm00001d006845	0.315467		7	0	0	12	-1	M1
1754	SORBI-3002G373600	0.196898	Zm00001d022132	0.413716	Zm00001d006855	0.64461		16	0	0	0	-1	Not_Neo
1755	SORBI-3002G374100	0.114496	Zm00001d022139	0.69317	Zm00001d006860	0.267153	Leucine rich repeat	13	0	3	0	-0.8125	Not_Neo
1756	SORBI-3002G374400	0.234877	Zm00001d022143	0.330962	Zm00001d006864	0.440273		0	0	16	0	0	Not_Neo
1757	SORBI-3002G374600	0.0479375	Zm00001d022144	0.0786095	Zm00001d006866	0.0474269		0	5	11	0	-0.3125	Not_Neo
1758	SORBI-3002G375701	0.110435	Zm00001d022151	0.201924	Zm00001d006874	0.239612		2	3	7	16	0.138889	M1_M2
1759	SORBI-3002G375800	0.18691	Zm00001d022152	0.12788	Zm00001d006875	0.152254		16	0	0	0	-1	Not_Neo
1760	SORBI-3002G376000	0.113897	Zm00001d022154	#N/A	Zm00001d006879	#N/A		2	3	9	10	0.102041	M1_M2
1761	SORBI-3002G377100	0.0909876	Zm00001d022163	0.406382	Zm00001d006883	0.212822		2	5	9	0	0.109375	Not_Neo
1762	SORBI-3002G377300	0.125079	Zm00001d022166	0.0617846	Zm00001d006885	0.16184		0	11	5	0	-0.6875	Not_Neo
1763	SORBI-3002G379500	0.0565804	Zm00001d022180	0.0662803	Zm00001d006899	0.0252992	EF-hand domain pair	0	0	16	0	0	Not_Neo
1764	SORBI-3002G379600	0.0123686	Zm00001d022181	0.0937256	Zm00001d006900	0.110409	Mitochondrial carrier protein	0	7	9	0	-0.4375	Not_Neo
1765	SORBI-3002G380500	0.242684	Zm00001d022189	0.159716	Zm00001d006906	0.292532		2	0	14	0	-0.125	Not_Neo
1766	SORBI-3002G380700	0.0547996	Zm00001d022190	0.109693	Zm00001d006910	0.0449974	Mitochondrial carrier protein	0	1	15	0	-0.0625	Not_Neo
1767	SORBI-3002G381400	0.222148	Zm00001d022192	0.0970975	Zm00001d006913	0.175114		0	4	0	16	-1	M2
1768	SORBI-3002G381500	0.0872008	Zm00001d022192	0.0970975	Zm00001d006913	0.175114		0	4	0	16	-1	M2
1769	SORBI-3002G382100	0.486031	Zm00001d022195	0.446053	Zm00001d006915	0.227629		10	2	4	0	0.1875	Not_Neo
1770	SORBI-3002G382600	0.412681	Zm00001d022199	0.409622	Zm00001d006916	0.303384		0	3	13	0	-0.1875	Not_Neo
1771	SORBI-3002G383100	0.229261	Zm00001d022201	0.163289	Zm00001d006917	0.1444		0	3	13	0	-0.1875	Not_Neo
1772	SORBI-3002G383300	0.0150411	Zm00001d022202	0.0564681	Zm00001d006918	0.0295183		0	0	16	0	0	Not_Neo
1773	SORBI-3002G384200	4.14372	Zm00001d022212	0.685613	Zm00001d006921	0.63674		0	6	10	0	-0.375	Not_Neo
1774	SORBI-3002G386200	#N/A	Zm00001d022234	#N/A	Zm00001d007015	#N/A		16	0	0	0	-1	Not_Neo
1775	SORBI-3002G386400	0.153607	Zm00001d022237	0.12849	Zm00001d007012	0.142185		6	0	10	0	-0.375	Not_Neo
1776	SORBI-3002G386700	0.113108	Zm00001d022238	0.0312497	Zm00001d006951	0.0784395		0	6	10	0	-0.375	Not_Neo
1777	SORBI-3002G387900	0.284755	Zm00001d022249	0.259088	Zm00001d006950	0.425839	Pumilio-family RNA binding repeat	0	15	1	1	-0.9375	Not_Neo
1778	SORBI-3002G388800	0.0858798	Zm00001d022262	0.114559	Zm00001d006947	0.0811889		0	16	0	3	-1	Not_Neo
1779	SORBI-3002G388900	0.0762727	Zm00001d022262	0.114559	Zm00001d006947	0.0811889		0	16	0	0	-1	Not_Neo
1780	SORBI-3002G389000	0.0748535	Zm00001d022262	0.114559	Zm00001d006947	0.0811889		0	16	0	1	-1	Not_Neo
1781	SORBI-3002G389100	0.0773965	Zm00001d022262	0.114559	Zm00001d006948	0.0688963		0	16	0	5	-1	Not_Neo
1782	SORBI-3002G389600	0.108177	Zm00001d022266	0.122173	Zm00001d006945	0.10884		2	12	2	3	0.21875	Not_Neo
1783	SORBI-3002G390100	0.258105	Zm00001d022272	0.112757	Zm00001d006944	0.109308		0	1	15	8	-0.0625	Not_Neo
1784	SORBI-3002G390400	0.229975	Zm00001d022273	0.173768	Zm00001d006941	0.488837		16	0	0	0	-1	Not_Neo
1785	SORBI-3002G390600	0.141453	Zm00001d022275	0.0904259	Zm00001d006939	0.097689		14	0	2	0	-0.875	Not_Neo
1786	SORBI-3002G392100	0.147898	Zm00001d022280	0.039466	Zm00001d006933	0.00415816	Mlo family	0	16	0	1	-1	Not_Neo
1787	SORBI-3002G391300	0.140256	Zm00001d022284	0.119275	Zm00001d006933	0.00415816		0	16	0	1	-1	Not_Neo
1788	SORBI-3002G391400	0.106141	Zm00001d022284	0.119275	Zm00001d006937	0.42306		5	1	0	13	0.111111	Not_Neo
1789	SORBI-3002G391700	0.191675	Zm00001d022290	0.267626	Zm00001d006937	0.42306	ADP-ribosylation factor family	2	0	0	16	-1	M1
1790	SORBI-3002G391900	0.404785	Zm00001d022290	0.267626	Zm00001d006937	0.42306	ADP-ribosylation factor family	7	0	0	15	-1	M1
1791	SORBI-3002G392000	0.181513	Zm00001d022290	0.267626	Zm00001d006933	0.00415816	ADP-ribosylation factor family	4	9	3	0	0.484375	Not_Neo
1792	SORBI-3002G392600	0.0765423	Zm00001d022296	#N/A	Zm00001d006930	#N/A		0	16	0	0	-1	Not_Neo
1793	SORBI-3002G393200	0.0491858	Zm00001d022305	0.0187168	Zm00001d007029	0.0438809		4	1	11	0	0.015625	Not_Neo
1794	SORBI-3002G393400	0.000103568	Zm00001d022307	0.000106359	Zm00001d007031	0.991022		0	0	16	0	0	Not_Neo
1795	SORBI-3002G394400	0.194119	Zm00001d022314	0.210018	Zm00001d007037	0.133675		0	16	0	0	-1	Not_Neo
1796	SORBI-3002G394600	#N/A	Zm00001d022316	#N/A	Zm00001d007038	#N/A		16	0	0	0	-1	Not_Neo
1797	SORBI-3002G394800	#N/A	Zm00001d022322	#N/A	Zm00001d007039	#N/A		0	0	16	0	0	Not_Neo
1798	SORBI-3002G396000	0.0488869	Zm00001d022335	0.0692477	Zm00001d007043	0.267136		0	3	13	0	-0.1875	Not_Neo
1799	SORBI-3002G396700	0.0443035	Zm00001d022341	0.077255	Zm00001d007048	0.111788		15	0	1	0	-0.9375	Not_Neo
1800	SORBI-3002G397600	0.294853	Zm00001d022347	0.261642	Zm00001d007050	0.110712	Nucleotidyltransferase domain	9	0	7	2	-0.5625	Not_Neo
1801	SORBI-3002G398500	0.0374782	Zm00001d022350	0.537228	Zm00001d007058	0.0855718	Gamma-thionin family	0	16	0	0	-1	Not_Neo
1802	SORBI-3002G398901	999.483	Zm00001d022354	0.239808	Zm00001d007059	0.373953		0	16	0	0	-1	Not_Neo
1803	SORBI-3002G399500	0.08029	Zm00001d022364	0.200135	Zm00001d007062	0.428121		2	0	14	0	-0.125	Not_Neo
1804	SORBI-3002G400000	0.0424613	Zm00001d022366	0.103951	Zm00001d007068	0.123378		0	9	7	0	-0.5625	Not_Neo
1805	SORBI-3002G400700	0.447824	Zm00001d022368	0.226413	Zm00001d007071	0.263347		4	0	0	16	-1	M1_M2
1806	SORBI-3002G401000	0.155483	Zm00001d022371	0.231957	Zm00001d007072	0.144624		16	0	0	1	-1	Not_Neo
1807	SORBI-3002G401200	0.16838	Zm00001d022374	0.157273	Zm00001d007073	0.10277		9	0	7	0	-0.5625	Not_Neo
1808	SORBI-3002G401500	0.231972	Zm00001d022378	0.275881	Zm00001d007075	0.158		0	0	16	0	0	Not_Neo
1809	SORBI-3002G401600	0.151502	Zm00001d022380	0.157719	Zm00001d007076	0.138266	Phosphate-induced protein 1 conserved region	15	0	1	3	-0.9375	Not_Neo
1810	SORBI-3002G402000	1.48456	Zm00001d022384	0.531185	Zm00001d007080	0.10031	Histidine kinase-, DNA gyrase B-, and HSP90-like ATPase	0	10	6	0	-0.625	Not_Neo
1811	SORBI-3002G402600	0.232817	Zm00001d022387	0.367501	Zm00001d007081	0.526857		2	1	13	0	0.015625	Not_Neo
1812	SORBI-3002G403100	0.125777	Zm00001d022391	0.310205	Zm00001d007082	0.170404		7	2	7	9	0.140625	Not_Neo
1813	SORBI-3002G403600	0.0865842	Zm00001d022395	0.170986	Zm00001d007085	0.355793		0	15	1	7	-0.9375	Not_Neo
1814	SORBI-3002G404700	0.0966248	Zm00001d022405	0.167755	Zm00001d007089	0.187441		0	0	16	0	0	Not_Neo
1815	SORBI-3002G405400	0.0668142	Zm00001d022407	0.293997	Zm00001d007095	0.172052		0	13	3	0	-0.8125	Not_Neo
1816	SORBI-3002G405500	0.424424	Zm00001d022414	0.306385	Zm00001d007096	0.374008		0	4	12	0	-0.25	Not_Neo
1817	SORBI-3002G405600	0.0645062	Zm00001d022416	0.251145	Zm00001d007097	0.277816		15	0	1	0	-0.9375	Not_Neo
1818	SORBI-3002G420600	0.123649	Zm00001d022425	0.151753	Zm00001d007186	0.117485		0	4	12	0	-0.25	Not_Neo
1819	SORBI-3002G420100	0.502027	Zm00001d022428	0.465127	Zm00001d007184	0.495638		6	1	9	0	0.015625	Not_Neo
1820	SORBI-3002G419800	0.251572	Zm00001d022429	0.291694	Zm00001d007183	0.221104		12	0	4	0	-0.75	Not_Neo
1821	SORBI-3002G419700	0.283328	Zm00001d022430	0.106478	Zm00001d007181	0.0831379		7	5	2	0	0.673469	Not_Neo
1822	SORBI-3002G419100	0.0958343	Zm00001d022433	0.105451	Zm00001d007179	0.0774962		0	9	7	0	-0.5625	Not_Neo
1823	SORBI-3002G418900	0.414661	Zm00001d022435	0.336513	Zm00001d007175	0.316135		0	12	2	3	-0.857143	M2
1824	SORBI-3002G418400	9.75599e-05	Zm00001d022438	0.0287634	Zm00001d007174	0.221841		16	0	0	0	-1	Not_Neo
1825	SORBI-3002G418200	0.210437	Zm00001d022440	0.202623	Zm00001d007173	0.284815	Protein tyrosine kinase	14	0	2	0	-0.875	Not_Neo
1826	SORBI-3002G418100	0.101836	Zm00001d022442	0.0844932	Zm00001d007172	#N/A		0	1	15	0	-0.0625	Not_Neo
1827	SORBI-3002G414700	0.0274886	Zm00001d022463	0.067133	Zm00001d007154	0.00176165		13	0	3	0	-0.8125	Not_Neo
1828	SORBI-3002G413500	0.231391	Zm00001d022465	0.27388	Zm00001d007146	0.184986		0	0	16	0	0	Not_Neo
1829	SORBI-3002G413400	0.000103985	Zm00001d022466	0.0226321	Zm00001d007145	0.0243652		0	0	16	0	0	Not_Neo
1830	SORBI-3002G412700	0.106131	Zm00001d022469	0.212275	Zm00001d007133	0.221839		16	0	0	0	-1	Not_Neo
1831	SORBI-3002G412800	0.165623	Zm00001d022469	0.212275	Zm00001d007135	#N/A		16	0	0	0	-1	Not_Neo
1832	SORBI-3002G412400	0.105004	Zm00001d022474	0.197484	Zm00001d007130	0.358835	tRNA synthetases class I (I, L, M and V)	13	0	3	1	-0.8125	Not_Neo
1833	SORBI-3002G412100	1142.33	Zm00001d022477	0.00981522	Zm00001d007123	0.21401		0	0	0	16	NA	M1_M2
1834	SORBI-3002G411600	0.337402	Zm00001d022481	0.434937	Zm00001d007121	0.470083		0	0	16	0	0	Not_Neo
1835	SORBI-3002G409800	0.0592097	Zm00001d022490	0.100521	Zm00001d007113	0.0816478		9	0	7	0	-0.5625	Not_Neo
1836	SORBI-3002G408800	0.138253	Zm00001d022499	0.145868	Zm00001d007111	0.133426		0	0	16	0	0	Not_Neo
1837	SORBI-3002G408500	0.161084	Zm00001d022500	0.485371	Zm00001d007107	0.360291	Chitinase class I	5	2	2	16	0.345679	M1_M2
1838	SORBI-3002G420800	0.0661518	Zm00001d022516	0.00929153	Zm00001d007187	0.00126719		2	0	3	16	-0.4	M1_M2
1839	SORBI-3002G420900	0.0362359	Zm00001d022516	0.00929153	Zm00001d007187	0.00126719		5	7	3	0	0.586667	Not_Neo
1840	SORBI-3002G422300	0.209636	Zm00001d022530	0.184971	Zm00001d007188	0.171144		11	1	4	4	0.015625	Not_Neo
1841	SORBI-3002G423800	#N/A	Zm00001d022541	#N/A	Zm00001d007193	#N/A		0	3	13	0	-0.1875	Not_Neo
1842	SORBI-3002G424350	0.0532291	Zm00001d022546	0.139309	Zm00001d007196	0.375303		16	0	0	0	-1	Not_Neo
1843	SORBI-3002G426400	0.264705	Zm00001d022560	0.18852	Zm00001d007202	0.301047		0	0	16	0	0	Not_Neo
1844	SORBI-3002G426800	#N/A	Zm00001d022562	#N/A	Zm00001d007204	#N/A		0	12	4	7	-0.75	Not_Neo
1845	SORBI-3002G426900	0.142968	Zm00001d022563	0.146238	Zm00001d007205	0.241792		1	12	2	0	0.0177778	Not_Neo
1846	SORBI-3002G427300	0.0825821	Zm00001d022565	0.149598	Zm00001d007207	0.0907288		1	1	14	0	0.015625	Not_Neo
1847	SORBI-3002G428200	0.0171167	Zm00001d022573	0.0222878	Zm00001d007215	0.0139752		0	6	10	0	-0.375	Not_Neo
1848	SORBI-3002G428600	0.0981495	Zm00001d022575	0.10905	Zm00001d007216	0.173455		11	0	1	16	-0.916667	M1
1849	SORBI-3002G430200	0.034979	Zm00001d022585	0.233291	Zm00001d007227	0.502151		16	0	0	0	-1	Not_Neo
1850	SORBI-3002G430900	0.293089	Zm00001d022587	0.481165	Zm00001d007232	0.447275		6	7	3	1	0.640625	Not_Neo
1851	SORBI-3002G282500	0.288663	Zm00001d022594	0.142721	Zm00001d006257	0.253459		16	0	0	0	-1	Not_Neo
1852	SORBI-3002G282300	0.229321	Zm00001d022596	0.225069	Zm00001d006256	0.318994		0	16	0	3	-1	Not_Neo
1853	SORBI-3002G281300	0.113498	Zm00001d022604	0.0885933	Zm00001d006249	#N/A		13	0	3	0	-0.8125	Not_Neo
1854	SORBI-3002G281200	997.884	Zm00001d022605	0.186455	Zm00001d006247	0.124596		0	16	0	0	-1	Not_Neo
1855	SORBI-3002G280900	0.435326	Zm00001d022611	#N/A	Zm00001d006246	#N/A		0	5	11	0	-0.3125	Not_Neo
1856	SORBI-3002G279900	0.432186	Zm00001d022621	0.144982	Zm00001d006243	0.1984		13	0	0	12	-1	M1
1857	SORBI-3002G279700	0.138502	Zm00001d022622	0.27891	Zm00001d006242	0.18804		3	0	13	0	-0.1875	Not_Neo
1858	SORBI-3002G279500	0.0622635	Zm00001d022625	0.161376	Zm00001d006238	0.275251		0	16	0	0	-1	Not_Neo
1859	SORBI-3002G279300	0.0921739	Zm00001d022627	0.141531	Zm00001d006237	0.178453		0	0	16	0	0	Not_Neo
1860	SORBI-3002G279100	0.0546031	Zm00001d022628	0.0605056	Zm00001d006236	0.170929		0	8	8	0	-0.5	Not_Neo
1861	SORBI-3002G279000	0.000106133	Zm00001d022629	0.0194516	Zm00001d006235	0.0268607		0	0	16	0	0	Not_Neo
1862	SORBI-3002G278100	0.0851894	Zm00001d022647	0.0960428	Zm00001d006232	0.0875401		1	8	6	0	0.0177778	Not_Neo
1863	SORBI-3008G011000	#N/A	Zm00001d023239	#N/A	Zm00001d044630	#N/A	2OG-Fe(II) oxygenase superfamily	16	0	0	0	-1	Not_Neo
1864	SORBI-3008G013300	#N/A	Zm00001d023252	#N/A	Zm00001d044635	#N/A		16	0	0	0	-1	Not_Neo
1865	SORBI-3008G013800	#N/A	Zm00001d023253	#N/A	Zm00001d044639	#N/A		1	9	0	14	0.04	M2
1866	SORBI-3008G018900	#N/A	Zm00001d023272	#N/A	Zm00001d044657	#N/A		15	0	1	6	-0.9375	Not_Neo
1867	SORBI-3008G019800	#N/A	Zm00001d023280	#N/A	Zm00001d044660	#N/A	Dof domain, zinc finger	2	1	13	9	0.015625	Not_Neo
1868	SORBI-3008G019900	#N/A	Zm00001d023280	#N/A	Zm00001d044660	#N/A	Dof domain, zinc finger	2	1	13	1	0.015625	Not_Neo
1869	SORBI-3008G020000	#N/A	Zm00001d023280	#N/A	Zm00001d044660	#N/A	Dof domain, zinc finger	2	1	13	5	0.015625	Not_Neo
1870	SORBI-3008G021000	0.136634	Zm00001d023291	0.142417	Zm00001d044663	0.1068		0	0	16	0	0	Not_Neo
1871	SORBI-3008G021100	0.0166379	Zm00001d023293	0.0268024	Zm00001d044664	0.0213514		0	2	14	0	-0.125	Not_Neo
1872	SORBI-3008G022200	0.175571	Zm00001d023299	0.158408	Zm00001d044667	0.140003		0	16	0	1	-1	Not_Neo
1873	SORBI-3008G025700	#N/A	Zm00001d023309	#N/A	Zm00001d044673	#N/A		16	0	0	0	-1	Not_Neo
1874	SORBI-3008G030600	1.05787	Zm00001d023345	0.126652	Zm00001d044685	0.206906		9	1	0	0	0.04	Not_Neo
1875	SORBI-3008G032100	0.131288	Zm00001d023366	0.36647	Zm00001d044691	0.164329		0	16	0	0	-1	Not_Neo
1876	SORBI-3008G032200	#N/A	Zm00001d023367	#N/A	Zm00001d044692	#N/A		0	1	15	0	-0.0625	Not_Neo
1877	SORBI-3008G032600	#N/A	Zm00001d023371	#N/A	Zm00001d044694	#N/A		0	0	16	0	0	Not_Neo
1878	SORBI-3008G033400	0.380208	Zm00001d023378	0.203469	Zm00001d044695	0.157508		4	1	11	1	0.015625	Not_Neo
1879	SORBI-3008G036000	0.0896701	Zm00001d023400	#N/A	Zm00001d044703	0.0781062	Pollen allergen	0	14	2	2	-0.875	Not_Neo
1880	SORBI-3008G037700	0.505983	Zm00001d023422	0.487753	Zm00001d044707	0.805165		16	0	0	12	-1	Not_Neo
1881	SORBI-3008G037800	0.596101	Zm00001d023423	0.175445	Zm00001d044713	0.0706186		16	0	0	0	-1	Not_Neo
1882	SORBI-3008G046600	0.0687116	Zm00001d023507	0.214621	Zm00001d041920	0.178364	Dynamin family	0	13	3	0	-0.8125	Not_Neo
1883	SORBI-3008G046800	0.281493	Zm00001d023510	0.348463	Zm00001d041918	0.183849	Holliday junction resolvase	10	0	6	0	-0.625	Not_Neo
1884	SORBI-3008G047800	0.113971	Zm00001d023520	0.148183	Zm00001d041911	0.0229142		3	0	13	0	-0.1875	Not_Neo
1885	SORBI-3008G047700	0.366919	Zm00001d023521	0.400896	Zm00001d041912	0.231581		10	0	6	0	-0.625	Not_Neo
1886	SORBI-3008G047600	0.0406632	Zm00001d023522	0.0543824	Zm00001d041913	0.0951554		1	7	8	11	0.015625	Not_Neo
1887	SORBI-3008G051400	0.229593	Zm00001d023539	0.479518	Zm00001d041883	0.178841		0	7	9	0	-0.4375	Not_Neo
1888	SORBI-3008G051800	0.0877729	Zm00001d023542	9.48817e-05	Zm00001d041882	0.0175111		0	13	3	0	-0.8125	Not_Neo
1889	SORBI-3008G051900	0.0708484	Zm00001d023542	9.48817e-05	Zm00001d041882	0.0175111		0	13	3	0	-0.8125	Not_Neo
1890	SORBI-3008G052300	0.257732	Zm00001d023544	0.448071	Zm00001d041877	#N/A		7	0	9	0	-0.4375	Not_Neo
1891	SORBI-3008G053300	0.10646	Zm00001d023560	0.107755	Zm00001d041871	0.0646329		0	16	0	0	-1	Not_Neo
1892	SORBI-3008G055000	0.216206	Zm00001d023569	#N/A	Zm00001d041856	#N/A		0	13	0	2	-1	Not_Neo
1893	SORBI-3008G055900	0.0683744	Zm00001d023576	0.0713562	Zm00001d041852	0.0558965		0	0	16	0	0	Not_Neo
1894	SORBI-3008G056100	#N/A	Zm00001d023577	#N/A	Zm00001d041850	#N/A	linker histone H1 and H5 family	3	0	13	0	-0.1875	Not_Neo
1895	SORBI-3008G059900	0.260137	Zm00001d023606	0.0954119	Zm00001d041839	0.191432		6	0	10	0	-0.375	Not_Neo
1896	SORBI-3008G089100	0.0998504	Zm00001d023634	0.151233	Zm00001d041098	#N/A		0	15	1	0	-0.9375	Not_Neo
1897	SORBI-3008G098900	0.0169097	Zm00001d023640	0.12151	Zm00001d041035	#N/A		0	10	6	0	-0.625	Not_Neo
1898	SORBI-3008G094600	0.0927577	Zm00001d023671	0.112568	Zm00001d041065	0.126902		1	15	0	0	0.015625	Not_Neo
1899	SORBI-3008G094400	0.0316795	Zm00001d023673	0.108057	Zm00001d041067	0.0790129		1	0	0	16	-1	M1_M2
1900	SORBI-3008G094000	0.0261414	Zm00001d023677	0.0815819	Zm00001d041067	0.0790129		1	0	0	16	-1	M1_M2
1901	SORBI-3008G094300	0.0959673	Zm00001d023677	0.0815819	Zm00001d041067	0.0790129		1	0	0	16	-1	M1_M2
1902	SORBI-3008G062700	0.413117	Zm00001d023700	0.267079	Zm00001d041796	0.400489		1	1	0	16	1	M1_M2
1903	SORBI-3008G063000	0.161546	Zm00001d023706	0.105945	Zm00001d041803	0.156305		7	0	9	0	-0.4375	Not_Neo
1904	SORBI-3008G063100	0.0380737	Zm00001d023707	0.224524	Zm00001d041804	0.000100402		2	0	1	16	-0.666667	M1_M2
1905	SORBI-3008G063300	0.217005	Zm00001d023710	0.34895	Zm00001d041816	0.483721	Protein kinase domain	2	3	11	1	0.078125	Not_Neo
1906	SORBI-3008G104500	0.0619532	Zm00001d023720	#N/A	Zm00001d041748	0.00240783		0	16	0	0	-1	Not_Neo
1907	SORBI-3008G105500	0.0606715	Zm00001d023720	#N/A	Zm00001d041748	0.00240783		0	8	0	15	-1	M2
1908	SORBI-3008G106100	0.0894506	Zm00001d023720	#N/A	Zm00001d041748	0.00240783		0	16	0	2	-1	Not_Neo
1909	SORBI-3008G103800	0.0448174	Zm00001d023733	0.256166	Zm00001d041751	0.516632		16	0	0	0	-1	Not_Neo
1910	SORBI-3008G103900	0.203959	Zm00001d023734	0.408664	Zm00001d041750	0.311998	BAH domain	0	0	16	0	0	Not_Neo
1911	SORBI-3008G099100	#N/A	Zm00001d023785	#N/A	Zm00001d040991	#N/A		6	2	8	0	0.125	Not_Neo
1912	SORBI-3008G086200	0.606231	Zm00001d023797	0.408712	Zm00001d041136	0.507738		9	0	7	0	-0.5625	Not_Neo
1913	SORBI-3008G088200	0.000108616	Zm00001d023802	0.0719397	Zm00001d041119	#N/A		0	0	16	0	0	Not_Neo
1914	SORBI-3008G125200	0.45726	Zm00001d023815	0.207121	Zm00001d041624	0.238269		15	0	1	0	-0.9375	Not_Neo
1915	SORBI-3008G125100	#N/A	Zm00001d023817	#N/A	Zm00001d041625	#N/A		3	1	12	1	0.015625	Not_Neo
1916	SORBI-3008G125000	#N/A	Zm00001d023820	#N/A	Zm00001d041626	#N/A	Nucleoside diphosphate kinase	0	3	13	0	-0.1875	Not_Neo
1917	SORBI-3008G124500	0.118607	Zm00001d023825	0.208493	Zm00001d041635	0.132785		0	12	4	0	-0.75	Not_Neo
1918	SORBI-3008G123500	0.222752	Zm00001d023838	0.425086	Zm00001d041647	#N/A		0	0	16	0	0	Not_Neo
1919	SORBI-3008G118900	0.759995	Zm00001d023853	0.272958	Zm00001d041690	0.754082		3	1	12	0	0.015625	Not_Neo
1920	SORBI-3008G119400	0.168855	Zm00001d023856	0.0784873	Zm00001d041685	0.0914258		16	0	0	0	-1	Not_Neo
1921	SORBI-3008G118200	0.0730184	Zm00001d023867	0.150344	Zm00001d041693	0.178802		0	4	12	0	-0.25	Not_Neo
1922	SORBI-3008G117100	0.134843	Zm00001d023877	0.844876	Zm00001d041696	0.121818		7	0	9	0	-0.4375	Not_Neo
1923	SORBI-3008G116600	0.131166	Zm00001d023880	0.213265	Zm00001d041697	0.0965049	Protein kinase domain	0	4	12	0	-0.25	Not_Neo
1924	SORBI-3008G116500	0.244568	Zm00001d023885	0.221985	Zm00001d041698	0.157805		16	0	0	0	-1	Not_Neo
1925	SORBI-3008G116400	0.259011	Zm00001d023887	0.128441	Zm00001d041701	0.000101111		0	14	2	0	-0.875	Not_Neo
1926	SORBI-3008G116000	0.331894	Zm00001d023892	0.124851	Zm00001d041700	0.481639	UDP-glucoronosyl and UDP-glucosyl transferase	7	0	7	16	-0.5	M1
1927	SORBI-3008G116100	0.300713	Zm00001d023892	0.124851	Zm00001d041700	0.481639	UDP-glucoronosyl and UDP-glucosyl transferase	4	0	7	16	-0.363636	M1
1928	SORBI-3008G115000	0.14986	Zm00001d023897	0.172774	Zm00001d041715	0.222101		8	0	8	4	-0.5	Not_Neo
1929	SORBI-3008G113700	0.448889	Zm00001d023904	0.284004	Zm00001d041711	0.413001		15	0	1	6	-0.9375	Not_Neo
1930	SORBI-3008G113300	0.460081	Zm00001d023912	0.441414	Zm00001d041707	0.509162		0	14	2	2	-0.875	Not_Neo
1931	SORBI-3008G113100	0.149277	Zm00001d023914	0.193439	Zm00001d041708	0.216493		2	1	13	0	0.015625	Not_Neo
1932	SORBI-3008G112800	#N/A	Zm00001d023919	#N/A	Zm00001d041703	#N/A		0	5	11	0	-0.3125	Not_Neo
1933	SORBI-3008G112500	0.0933818	Zm00001d023927	0.0843042	Zm00001d041702	0.209571		4	2	2	16	0.375	M1_M2
1934	SORBI-3008G072200	0.0822608	Zm00001d023943	0.0593296	Zm00001d041785	0.0593213		0	0	16	0	0	Not_Neo
1935	SORBI-3008G072600	0.0729854	Zm00001d023950	0.112126	Zm00001d041782	0.0974032	Glycosyl hydrolase family 14	4	1	10	15	0.0177778	M2
1936	SORBI-3008G073600	0.100319	Zm00001d023962	0.0957499	Zm00001d041767	0.248764		0	0	16	0	0	Not_Neo
1937	SORBI-3008G074300	0.135073	Zm00001d023968	0.196815	Zm00001d041772	0.314402		3	5	8	0	0.203125	Not_Neo
1938	SORBI-3008G074400	0.18005	Zm00001d023968	0.196815	Zm00001d041772	0.314402		3	5	8	0	0.203125	Not_Neo
1939	SORBI-3008G080100	#N/A	Zm00001d024000	#N/A	Zm00001d041173	#N/A		0	2	0	16	-1	M2
1940	SORBI-3008G080700	0.198656	Zm00001d024003	0.131434	Zm00001d041165	0.211088		5	0	1	16	-0.833333	M1
1941	SORBI-3008G079800	#N/A	Zm00001d024037	#N/A	Zm00001d041173	#N/A		0	16	0	0	-1	Not_Neo
1942	SORBI-3008G083200	0.110664	Zm00001d024041	0.495385	Zm00001d041142	0.365624		0	0	16	0	0	Not_Neo
1943	SORBI-3008G084100	0.0792264	Zm00001d024051	0.198009	Zm00001d041112	#N/A		0	15	1	0	-0.9375	Not_Neo
1944	SORBI-3008G084600	0.111891	Zm00001d024051	0.198009	Zm00001d041112	#N/A		0	15	1	0	-0.9375	Not_Neo
1945	SORBI-3007G094400	0.079644	Zm00001d024066	0.0986349	Zm00001d050182	0.0552176		0	13	3	0	-0.8125	Not_Neo
1946	SORBI-3007G095400	0	Zm00001d024082	0.281175	Zm00001d050172	#N/A		0	5	11	0	-0.3125	Not_Neo
1947	SORBI-3007G096000	0.464864	Zm00001d024088	0.450745	Zm00001d050174	0.440418		0	2	14	0	-0.125	Not_Neo
1948	SORBI-3007G097800	0.316216	Zm00001d024105	#N/A	Zm00001d050168	#N/A		1	4	8	13	0.0236686	M2
1949	SORBI-3007G099200	#N/A	Zm00001d024126	#N/A	Zm00001d050163	#N/A		1	0	15	0	-0.0625	Not_Neo
1950	SORBI-3007G092200	0.225705	Zm00001d024203	0.185124	Zm00001d050187	0.569087		6	0	10	0	-0.375	Not_Neo
1951	SORBI-3007G062100	0.0976481	Zm00001d024213	#N/A	Zm00001d049464	#N/A		16	0	0	0	-1	Not_Neo
1952	SORBI-3007G062500	0.367979	Zm00001d024222	0.4273	Zm00001d049459	0.476877		1	2	13	0	0.015625	Not_Neo
1953	SORBI-3007G062800	0.157431	Zm00001d024225	0.0998655	Zm00001d049457	0.348043		11	0	5	0	-0.6875	Not_Neo
1954	SORBI-3007G068900	0.000104386	Zm00001d024239	0.0260862	Zm00001d049405	0.0133687		0	0	16	0	0	Not_Neo
1955	SORBI-3007G069600	0.11847	Zm00001d024251	0.28291	Zm00001d049400	0.0690884	F-box domain	0	16	0	0	-1	Not_Neo
1956	SORBI-3007G075400	1.00895	Zm00001d024306	0.682156	Zm00001d049376	0.449377		0	16	0	0	-1	Not_Neo
1957	SORBI-3007G075800	0.473713	Zm00001d024310	0.302705	Zm00001d049372	0.185722	VQ motif	0	6	10	2	-0.375	Not_Neo
1958	SORBI-3007G075900	0.179498	Zm00001d024311	0.187503	Zm00001d049371	0.318575		0	2	14	0	-0.125	Not_Neo
1959	SORBI-3007G076200	0.432013	Zm00001d024318	0.312841	Zm00001d049370	0.532047		4	0	12	0	-0.25	Not_Neo
1960	SORBI-3007G076800	0.156707	Zm00001d024321	0.369213	Zm00001d049369	0.233278		0	16	0	0	-1	Not_Neo
1961	SORBI-3007G077001	0.419726	Zm00001d024324	0.183318	Zm00001d049364	0.176567		0	0	16	0	0	Not_Neo
1962	SORBI-3007G077100	0.125837	Zm00001d024324	0.183318	Zm00001d049364	0.176567		0	0	16	0	0	Not_Neo
1963	SORBI-3007G077200	0.125705	Zm00001d024324	0.183318	Zm00001d049364	0.176567		0	0	16	0	0	Not_Neo
1964	SORBI-3007G077300	0.43577	Zm00001d024324	0.183318	Zm00001d049364	0.176567		0	0	16	0	0	Not_Neo
1965	SORBI-3007G078300	0.271178	Zm00001d024338	0.207817	Zm00001d049361	0.0120401		0	1	14	11	-0.0666667	M2
1966	SORBI-3007G078500	0.104706	Zm00001d024338	0.207817	Zm00001d049361	0.0120401		0	2	14	0	-0.125	Not_Neo
1967	SORBI-3007G078600	0.166386	Zm00001d024339	0.42051	Zm00001d049360	0.412551		0	0	16	0	0	Not_Neo
1968	SORBI-3007G079300	0.0696803	Zm00001d024342	0.783192	Zm00001d049357	0.131667		11	0	5	0	-0.6875	Not_Neo
1969	SORBI-3007G084100	0.252906	Zm00001d024357	0.110165	Zm00001d050190	#N/A		1	10	5	0	0.015625	Not_Neo
1970	SORBI-3007G084200	0.12659	Zm00001d024364	0.122292	Zm00001d050191	#N/A		0	0	16	0	0	Not_Neo
1971	SORBI-3007G085001	0.0330633	Zm00001d024373	0.0238143	Zm00001d050193	#N/A		0	16	0	0	-1	Not_Neo
1972	SORBI-3007G085000	0.0499922	Zm00001d024373	0.0238143	Zm00001d050193	#N/A		0	16	0	0	-1	Not_Neo
1973	SORBI-3007G085300	0.162441	Zm00001d024376	0.163069	Zm00001d050195	#N/A		0	16	0	0	-1	Not_Neo
1974	SORBI-3007G087000	0.0841247	Zm00001d024408	0.149594	Zm00001d050208	0.0886572		1	0	15	0	-0.0625	Not_Neo
1975	SORBI-3007G059900	0.179996	Zm00001d024425	0.343256	Zm00001d049479	0.344885		16	0	0	0	-1	Not_Neo
1976	SORBI-3007G059600	0.197678	Zm00001d024430	0.0551599	Zm00001d049480	0.105191	Protein of unknown function (DUF295)	11	0	5	0	-0.6875	Not_Neo
1977	SORBI-3007G056500	0.164612	Zm00001d024466	0.372235	Zm00001d049487	0.35684		0	7	9	0	-0.4375	Not_Neo
1978	SORBI-3007G053500	0.101756	Zm00001d024510	0.0504185	Zm00001d049496	0.271032		0	10	6	0	-0.625	Not_Neo
1979	SORBI-3007G053300	9.91054e-05	Zm00001d024511	0.0141379	Zm00001d049500	0.0136956		0	0	16	0	0	Not_Neo
1980	SORBI-3007G051200	0.187463	Zm00001d024528	0.0337667	Zm00001d049505	0.0335395		0	2	3	16	-0.4	M1_M2
1981	SORBI-3007G050600	0.0335382	Zm00001d024531	0.0374047	Zm00001d049510	0.0575127		1	0	15	0	-0.0625	Not_Neo
1982	SORBI-3007G050500	0.146578	Zm00001d024532	0.191471	Zm00001d049511	0.149107		16	0	0	0	-1	Not_Neo
1983	SORBI-3007G050300	0.0558161	Zm00001d024534	0.121093	Zm00001d049516	0.241123		16	0	0	0	-1	Not_Neo
1984	SORBI-3007G050200	0.0719449	Zm00001d024537	0.174869	Zm00001d049521	#N/A		1	0	15	0	-0.0625	Not_Neo
1985	SORBI-3007G048700	0.0884922	Zm00001d024540	0.202047	Zm00001d049533	0.682295		16	0	0	0	-1	Not_Neo
1986	SORBI-3007G047700	0.366911	Zm00001d024543	0.899985	Zm00001d049540	0.386396		0	11	5	0	-0.6875	Not_Neo
1987	SORBI-3007G047400	0.218092	Zm00001d024546	0.88054	Zm00001d049543	0.416944		6	0	10	0	-0.375	Not_Neo
1988	SORBI-3007G046200	0.112727	Zm00001d024567	0.365813	Zm00001d049548	0.242774		1	0	15	0	-0.0625	Not_Neo
1989	SORBI-3007G045700	0.5	Zm00001d024571	0.0325605	Zm00001d049552	0.0686832		0	0	16	0	0	Not_Neo
1990	SORBI-3007G045500	0.282867	Zm00001d024572	0.0767885	Zm00001d049554	0.062537		0	12	4	1	-0.75	Not_Neo
1991	SORBI-3007G043600	0.000112262	Zm00001d024593	0.0123434	Zm00001d049557	9.88236e-05		0	16	0	0	-1	Not_Neo
1992	SORBI-3007G042300	0.133323	Zm00001d024602	0.116848	Zm00001d049571	0.135047		9	0	7	0	-0.5625	Not_Neo
1993	SORBI-3007G039400	0.124653	Zm00001d024624	0.0656688	Zm00001d049579	0.0969524		16	0	0	0	-1	Not_Neo
1994	SORBI-3007G039200	0.10478	Zm00001d024627	0.294229	Zm00001d049581	0.306725		0	16	0	0	-1	Not_Neo
1995	SORBI-3007G035600	0.0880203	Zm00001d024661	0.0474563	Zm00001d049598	0.0632586		0	14	2	0	-0.875	Not_Neo
1996	SORBI-3007G035300	0.0306516	Zm00001d024664	0.0390382	Zm00001d049601	0.0653151		0	0	2	16	0	M1_M2
1997	SORBI-3007G035000	0.0877154	Zm00001d024665	0.012381	Zm00001d049601	0.0653151		2	0	4	16	-0.333333	M1_M2
1998	SORBI-3007G035500	0.0348893	Zm00001d024665	0.012381	Zm00001d049601	0.0653151		5	2	4	9	0.231405	M1_M2
1999	SORBI-3007G034200	#N/A	Zm00001d024677	#N/A	Zm00001d049605	#N/A		0	16	0	0	-1	Not_Neo
[truncated: 3,053 more rows]
[truncated: 2 more columns]

## Sheet: Analysis Dom vs Sub Inflores.
Triplet Number	M1 Id	M2 Id	M1 dom	M2 dom	Co-expression	Cells Not expressed	Final Score normalized	dominant allele		Behavior	Number of homeolog pair in Roots	Number of homeolog pair in Shoot conserving their behavior	% conserved		If Dom in root what behavior in shoot ?	Number of homeolog pair	Percent of total dominant in root		If Sub in root what behavior in shoot ?	Number of homeolog pair	Percent of total Sub in root		If M1 dom in root what is it is in shoot ?	Number of homeolog pair	Percent of total M1 dom in root		If M2 dom in root what is it is in shoot ?	Number of homeolog pair	Percent of total M2 dom in root
1	Zm00001d001766	Zm00001d026665	19	0	0	0	-1	M1		Dominant	2986	2154	0.721366		Dominant	2154	0.721366		Dominant	410	0.519645		M1 Dom	1509	0.732169		M1 Dom	383	0.239825
2	Zm00001d001772	Zm00001d026662	0	19	0	0	-1	M2		Subfunctionalized	789	378	0.479087		Subfunctionalized	769	0.257535		Subfunctionalized	378	0.479087		M2 Dom	479	0.232411		M2 Dom	1154	0.722605
3	Zm00001d001774	Zm00001d026657	19	0	0	0	-1	M1		Co-expressed	475	58	0.122105		Co-expressed	63	0.0210985		Co-expressed	1	0.00126743		Co expression	73	0.0354197		Co expression	60	0.0375704
4	Zm00001d001780	Zm00001d026653	7	0	12	0	-0.368421	M1		NotExpressed/analysed	802	802
5	Zm00001d001784	Zm00001d026652	0	19	0	0	-1	M2		different behavior than in root	0	1660
6	Zm00001d001787	Zm00001d026647	11	0	8	0	-0.578947	M1
7	Zm00001d001788	Zm00001d026645	1	4	14	0	0.0110803	M2
8	Zm00001d001790	Zm00001d026641	0	0	0	19	NotExpressed	equal
9	Zm00001d001797	Zm00001d026640	19	0	0	0	-1	M1
10	Zm00001d001798	Zm00001d026639	0	19	0	0	-1	M2
11	Zm00001d001800	Zm00001d026636	19	0	0	0	-1	M1
12	Zm00001d001811	Zm00001d026634	16	0	3	0	-0.842105	M1
13	Zm00001d001814	Zm00001d026630	0	1	18	0	-0.0526316	M2
14	Zm00001d001819	Zm00001d026629	1	4	14	0	0.0110803	M2
15	Zm00001d001824	Zm00001d026628	16	0	0	3	-1	M1
16	Zm00001d001825	Zm00001d026627	9	0	10	0	-0.473684	M1
17	Zm00001d001826	Zm00001d026625	1	13	1	4	0.0177778	M2
18	Zm00001d001828	Zm00001d026621	1	6	12	0	0.0110803	M2
19	Zm00001d001829	Zm00001d026620	4	6	4	5	0.44898	M2
20	Zm00001d001831	Zm00001d026619	5	0	14	0	-0.263158	M1
21	Zm00001d001839	Zm00001d026611	0	17	2	0	-0.894737	M2
22	Zm00001d001841	Zm00001d026609	0	2	17	0	-0.105263	M2
23	Zm00001d001843	Zm00001d026608	9	1	9	0	0.0110803	M1
24	Zm00001d001846	Zm00001d026607	6	0	13	0	-0.315789	M1
25	Zm00001d001850	Zm00001d026603	12	0	0	7	-1	M1
26	Zm00001d001855	Zm00001d026600	3	5	11	0	0.144044	M2
27	Zm00001d001857	Zm00001d026599	16	0	0	3	-1	M1
28	Zm00001d001862	Zm00001d026597	19	0	0	0	-1	M1
29	Zm00001d001865	Zm00001d026594	0	0	0	19	NotExpressed	equal
30	Zm00001d001866	Zm00001d026593	10	1	8	0	0.0110803	M1
31	Zm00001d001879	Zm00001d026590	0	0	0	19	NotExpressed	equal
32	Zm00001d001880	Zm00001d026588	0	0	19	0	0	equal
33	Zm00001d001880	Zm00001d026589	18	0	1	0	-0.947368	M1
34	Zm00001d001883	Zm00001d026586	15	0	4	0	-0.789474	M1
35	Zm00001d001883	Zm00001d026586	15	0	4	0	-0.789474	M1
36	Zm00001d001884	Zm00001d026585	1	1	17	0	0.0110803	equal
37	Zm00001d001895	Zm00001d026582	16	0	3	0	-0.842105	M1
38	Zm00001d001899	Zm00001d026578	0	19	0	0	-1	M2
39	Zm00001d001900	Zm00001d026577	2	3	14	0	0.0554017	M2
40	Zm00001d001900	Zm00001d026577	2	3	14	0	0.0554017	M2
41	Zm00001d001901	Zm00001d026575	1	0	18	0	-0.0526316	M1
42	Zm00001d001907	Zm00001d026563	0	1	18	0	-0.0526316	M2
43	Zm00001d001908	Zm00001d026562	1	1	17	0	0.0110803	equal
44	Zm00001d001910	Zm00001d026560	4	6	5	4	0.391111	M2
45	Zm00001d001915	Zm00001d026554	2	11	6	0	0.144044	M2
46	Zm00001d001928	Zm00001d026548	0	3	16	0	-0.157895	M2
47	Zm00001d001929	Zm00001d026547	6	0	13	0	-0.315789	M1
48	Zm00001d001932	Zm00001d026543	19	0	0	0	-1	M1
49	Zm00001d001936	Zm00001d026542	0	0	0	19	NotExpressed	equal
50	Zm00001d001937	Zm00001d026541	2	2	15	0	0.0443213	equal
51	Zm00001d001945	Zm00001d026540	0	0	0	19	NotExpressed	equal
52	Zm00001d001952	Zm00001d026536	0	4	15	0	-0.210526	M2
53	Zm00001d001953	Zm00001d026535	0	19	0	0	-1	M2
54	Zm00001d001959	Zm00001d026531	4	0	15	0	-0.210526	M1
55	Zm00001d001963	Zm00001d026530	0	9	1	9	-0.9	M2
56	Zm00001d001963	Zm00001d026530	0	9	1	9	-0.9	M2
57	Zm00001d001963	Zm00001d026530	0	9	1	9	-0.9	M2
58	Zm00001d001964	Zm00001d026530	15	1	0	3	0.015625	M1
59	Zm00001d001966	Zm00001d026517	3	0	16	0	-0.157895	M1
60	Zm00001d001967	Zm00001d026516	18	0	1	0	-0.947368	M1
61	Zm00001d001970	Zm00001d026515	19	0	0	0	-1	M1
62	Zm00001d001974	Zm00001d026514	0	19	0	0	-1	M2
63	Zm00001d001978	Zm00001d026511	0	0	19	0	0	equal
64	Zm00001d001982	Zm00001d026510	2	2	1	14	0.64	equal
65	Zm00001d001989	Zm00001d026500	11	4	4	0	0.409972	M1
66	Zm00001d001994	Zm00001d026495	2	4	13	0	0.066482	M2
67	Zm00001d002006	Zm00001d026490	0	0	0	19	NotExpressed	equal
68	Zm00001d002012	Zm00001d026487	0	8	11	0	-0.421053	M2
69	Zm00001d002019	Zm00001d026489	4	0	0	15	-1	M1
70	Zm00001d002020	Zm00001d026489	4	0	0	15	-1	M1
71	Zm00001d002022	Zm00001d026479	0	19	0	0	-1	M2
72	Zm00001d002024	Zm00001d026483	1	1	17	0	0.0110803	equal
73	Zm00001d002028	Zm00001d026478	18	0	1	0	-0.947368	M1
74	Zm00001d002029	Zm00001d026477	0	0	0	19	NotExpressed	equal
75	Zm00001d002034	Zm00001d026476	5	0	14	0	-0.263158	M1
76	Zm00001d002051	Zm00001d026472	5	1	13	0	0.0110803	M1
77	Zm00001d002056	Zm00001d026469	0	14	5	0	-0.736842	M2
78	Zm00001d002063	Zm00001d026471	16	1	1	1	0.0123457	M1
79	Zm00001d002063	Zm00001d026471	16	1	1	1	0.0123457	M1
80	Zm00001d002064	Zm00001d026460	4	9	5	1	0.382716	M2
81	Zm00001d002065	Zm00001d026458	0	0	0	19	NotExpressed	equal
82	Zm00001d002069	Zm00001d026457	19	0	0	0	-1	M1
83	Zm00001d002071	Zm00001d026457	15	0	1	3	-0.9375	M1
84	Zm00001d002071	Zm00001d026457	15	0	1	3	-0.9375	M1
85	Zm00001d002075	Zm00001d026448	0	0	0	19	NotExpressed	equal
86	Zm00001d002079	Zm00001d026447	0	0	0	19	NotExpressed	equal
87	Zm00001d002080	Zm00001d026445	17	0	2	0	-0.894737	M1
88	Zm00001d002083	Zm00001d026444	13	1	4	1	0.0123457	M1
89	Zm00001d002087	Zm00001d026442	17	0	2	0	-0.894737	M1
90	Zm00001d002088	Zm00001d026440	19	0	0	0	-1	M1
91	Zm00001d002089	Zm00001d026439	1	17	1	0	0.0110803	M2
92	Zm00001d002100	Zm00001d026431	11	2	3	3	0.203125	M1
93	Zm00001d002100	Zm00001d026431	11	2	3	3	0.203125	M1
94	Zm00001d002103	Zm00001d026429	1	3	15	0	0.0110803	M2
95	Zm00001d002119	Zm00001d026426	1	13	5	0	0.0110803	M2
96	Zm00001d002122	Zm00001d026425	8	2	9	0	0.110803	M1
97	Zm00001d002123	Zm00001d026424	0	11	0	8	-1	M2
98	Zm00001d002125	Zm00001d026421	0	19	0	0	-1	M2
99	Zm00001d002131	Zm00001d026414	4	8	7	0	0.310249	M2
100	Zm00001d002132	Zm00001d026406	18	0	1	0	-0.947368	M1
101	Zm00001d002132	Zm00001d026412	0	18	1	0	-0.947368	M2
102	Zm00001d002132	Zm00001d026412	0	18	1	0	-0.947368	M2
103	Zm00001d002133	Zm00001d026406	1	3	1	14	0.16	M2
104	Zm00001d002133	Zm00001d026406	1	3	1	14	0.16	M2
105	Zm00001d002141	Zm00001d026397	19	0	0	0	-1	M1
106	Zm00001d002143	Zm00001d026398	0	0	0	19	NotExpressed	equal
107	Zm00001d002145	Zm00001d026396	0	13	6	0	-0.684211	M2
108	Zm00001d002149	Zm00001d026394	0	7	12	0	-0.368421	M2
109	Zm00001d002150	Zm00001d026395	16	0	0	3	-1	M1
110	Zm00001d002155	Zm00001d026392	19	0	0	0	-1	M1
111	Zm00001d002156	Zm00001d026391	19	0	0	0	-1	M1
112	Zm00001d002156	Zm00001d026391	19	0	0	0	-1	M1
113	Zm00001d002161	Zm00001d026390	18	0	1	0	-0.947368	M1
114	Zm00001d002184	Zm00001d026361	0	19	0	0	-1	M2
115	Zm00001d002191	Zm00001d026377	0	14	2	3	-0.875	M2
116	Zm00001d002200	Zm00001d026379	1	9	2	7	0.0277778	M2
117	Zm00001d002241	Zm00001d026348	0	2	17	0	-0.105263	M2
118	Zm00001d002243	Zm00001d026347	2	0	17	0	-0.105263	M1
119	Zm00001d002244	Zm00001d026346	19	0	0	0	-1	M1
120	Zm00001d002252	Zm00001d026344	0	12	7	0	-0.631579	M2
121	Zm00001d002253	Zm00001d026343	0	19	0	0	-1	M2
122	Zm00001d002255	Zm00001d026341	2	8	8	1	0.123457	M2
123	Zm00001d002256	Zm00001d026337	2	0	17	0	-0.105263	M1
124	Zm00001d002257	Zm00001d026335	0	0	0	19	NotExpressed	equal
125	Zm00001d002266	Zm00001d026334	16	0	3	0	-0.842105	M1
126	Zm00001d002267	Zm00001d026333	0	8	11	0	-0.421053	M2
127	Zm00001d002272	Zm00001d026331	9	0	10	0	-0.473684	M1
128	Zm00001d002278	Zm00001d026329	19	0	0	0	-1	M1
129	Zm00001d002283	Zm00001d026322	12	1	6	0	0.0110803	M1
130	Zm00001d002284	Zm00001d026321	18	0	1	0	-0.947368	M1
131	Zm00001d002284	Zm00001d026321	18	0	1	0	-0.947368	M1
132	Zm00001d002286	Zm00001d026318	2	14	3	0	0.177285	M2
133	Zm00001d002292	Zm00001d026311	4	0	15	0	-0.210526	M1
134	Zm00001d002312	Zm00001d026306	11	2	5	1	0.160494	M1
135	Zm00001d002313	Zm00001d026306	16	0	3	0	-0.842105	M1
136	Zm00001d002315	Zm00001d026302	4	1	14	0	0.0110803	M1
137	Zm00001d002316	Zm00001d026300	0	0	0	19	NotExpressed	equal
138	Zm00001d002318	Zm00001d026297	0	19	0	0	-1	M2
139	Zm00001d002323	Zm00001d026296	1	7	11	0	0.0110803	M2
140	Zm00001d002325	Zm00001d026295	19	0	0	0	-1	M1
141	Zm00001d002326	Zm00001d026293	0	17	0	2	-1	M2
142	Zm00001d002330	Zm00001d026291	0	0	0	19	NotExpressed	equal
143	Zm00001d002332	Zm00001d026290	0	19	0	0	-1	M2
144	Zm00001d002332	Zm00001d026290	0	19	0	0	-1	M2
145	Zm00001d002333	Zm00001d026289	0	14	4	1	-0.777778	M2
146	Zm00001d002338	Zm00001d026287	10	1	8	0	0.0110803	M1
147	Zm00001d002339	Zm00001d026286	0	0	0	19	NotExpressed	equal
148	Zm00001d002341	Zm00001d026285	0	13	5	1	-0.722222	M2
149	Zm00001d002344	Zm00001d026284	16	0	3	0	-0.842105	M1
150	Zm00001d002348	Zm00001d026281	6	3	2	8	0.495868	M1
151	Zm00001d002352	Zm00001d026278	0	13	6	0	-0.684211	M2
152	Zm00001d002358	Zm00001d026277	0	0	0	19	NotExpressed	equal
153	Zm00001d002364	Zm00001d026271	0	0	0	19	NotExpressed	equal
154	Zm00001d002369	Zm00001d026269	2	4	13	0	0.066482	M2
155	Zm00001d002370	Zm00001d026268	4	0	0	15	-1	M1
156	Zm00001d002371	Zm00001d026267	19	0	0	0	-1	M1
157	Zm00001d002373	Zm00001d026265	0	3	16	0	-0.157895	M2
158	Zm00001d002374	Zm00001d026262	2	13	3	1	0.185185	M2
159	Zm00001d002382	Zm00001d026261	14	1	4	0	0.0110803	M1
160	Zm00001d002386	Zm00001d026260	2	0	17	0	-0.105263	M1
161	Zm00001d002387	Zm00001d026259	0	2	17	0	-0.105263	M2
162	Zm00001d002388	Zm00001d026257	1	0	18	0	-0.0526316	M1
163	Zm00001d002391	Zm00001d026258	0	1	18	0	-0.0526316	M2
164	Zm00001d002395	Zm00001d026254	0	15	4	0	-0.789474	M2
165	Zm00001d002396	Zm00001d026253	19	0	0	0	-1	M1
166	Zm00001d002405	Zm00001d026252	0	0	0	19	NotExpressed	equal
167	Zm00001d002409	Zm00001d026251	5	0	0	14	-1	M1
168	Zm00001d002410	Zm00001d026250	19	0	0	0	-1	M1
169	Zm00001d002412	Zm00001d026251	9	0	0	10	-1	M1
170	Zm00001d002416	Zm00001d026248	13	1	0	5	0.0204082	M1
171	Zm00001d002418	Zm00001d026246	0	3	16	0	-0.157895	M2
172	Zm00001d002424	Zm00001d026245	0	0	0	19	NotExpressed	equal
173	Zm00001d002425	Zm00001d026244	0	18	0	1	-1	M2
174	Zm00001d002429	Zm00001d026240	0	0	0	19	NotExpressed	equal
175	Zm00001d002431	Zm00001d026239	0	19	0	0	-1	M2
176	Zm00001d002432	Zm00001d026237	8	5	6	0	0.409972	M1
177	Zm00001d002444	Zm00001d026235	13	2	2	2	0.207612	M1
178	Zm00001d002450	Zm00001d026224	19	0	0	0	-1	M1
179	Zm00001d002451	Zm00001d026223	19	0	0	0	-1	M1
180	Zm00001d002452	Zm00001d026218	0	0	0	19	NotExpressed	equal
181	Zm00001d002456	Zm00001d026212	0	3	16	0	-0.157895	M2
182	Zm00001d002475	Zm00001d026206	1	4	14	0	0.0110803	M2
183	Zm00001d002476	Zm00001d026203	0	0	0	19	NotExpressed	equal
184	Zm00001d002479	Zm00001d026200	0	13	0	6	-1	M2
185	Zm00001d002479	Zm00001d026200	0	13	0	6	-1	M2
186	Zm00001d002483	Zm00001d026195	1	2	16	0	0.0110803	M2
187	Zm00001d002485	Zm00001d026193	0	9	10	0	-0.473684	M2
188	Zm00001d002489	Zm00001d026047	0	0	0	19	NotExpressed	equal
189	Zm00001d002492	Zm00001d026046	11	0	0	8	-1	M1
190	Zm00001d002492	Zm00001d026046	11	0	0	8	-1	M1
191	Zm00001d002495	Zm00001d026035	0	0	0	19	NotExpressed	equal
192	Zm00001d002498	Zm00001d026040	11	0	1	7	-0.916667	M1
193	Zm00001d002520	Zm00001d026029	1	10	8	0	0.0110803	M2
194	Zm00001d002520	Zm00001d026029	1	10	8	0	0.0110803	M2
195	Zm00001d002521	Zm00001d026028	6	1	12	0	0.0110803	M1
196	Zm00001d002522	Zm00001d026028	1	6	12	0	0.0110803	M2
197	Zm00001d002523	Zm00001d026028	19	0	0	0	-1	M1
198	Zm00001d002523	Zm00001d026029	19	0	0	0	-1	M1
199	Zm00001d002530	Zm00001d026026	1	12	6	0	0.0110803	M2
200	Zm00001d002535	Zm00001d026021	17	0	2	0	-0.894737	M1
201	Zm00001d002537	Zm00001d026020	19	0	0	0	-1	M1
202	Zm00001d002540	Zm00001d026018	0	0	0	19	NotExpressed	equal
203	Zm00001d002545	Zm00001d026017	0	0	0	19	NotExpressed	equal
204	Zm00001d002546	Zm00001d026015	0	0	0	19	NotExpressed	equal
205	Zm00001d002548	Zm00001d026014	1	0	18	0	-0.0526316	M1
206	Zm00001d002549	Zm00001d026012	5	0	14	0	-0.263158	M1
207	Zm00001d002553	Zm00001d026010	10	3	6	0	0.254848	M1
208	Zm00001d002553	Zm00001d026010	10	3	6	0	0.254848	M1
209	Zm00001d002562	Zm00001d026005	0	0	0	19	NotExpressed	equal
210	Zm00001d002564	Zm00001d026003	19	0	0	0	-1	M1
211	Zm00001d002568	Zm00001d026002	2	8	3	6	0.236686	M2
212	Zm00001d002573	Zm00001d026050	0	0	0	19	NotExpressed	equal
213	Zm00001d002576	Zm00001d026053	12	1	6	0	0.0110803	M1
214	Zm00001d002579	Zm00001d026055	19	0	0	0	-1	M1
215	Zm00001d002589	Zm00001d026056	0	0	0	19	NotExpressed	equal
216	Zm00001d002592	Zm00001d026060	0	0	0	19	NotExpressed	equal
217	Zm00001d002594	Zm00001d026061	0	0	0	19	NotExpressed	equal
218	Zm00001d002599	Zm00001d026063	14	0	4	1	-0.777778	M1
219	Zm00001d002600	Zm00001d026064	0	6	13	0	-0.315789	M2
220	Zm00001d002609	Zm00001d026066	16	0	2	1	-0.888889	M1
221	Zm00001d002609	Zm00001d026066	16	0	2	1	-0.888889	M1
222	Zm00001d002610	Zm00001d026067	1	16	0	2	0.0138408	M2
223	Zm00001d002610	Zm00001d026067	1	16	0	2	0.0138408	M2
224	Zm00001d002623	Zm00001d026076	19	0	0	0	-1	M1
225	Zm00001d002625	Zm00001d026079	5	2	12	0	0.0775623	M1
226	Zm00001d002629	Zm00001d026083	17	0	0	2	-1	M1
227	Zm00001d002630	Zm00001d026084	7	2	10	0	0.099723	M1
228	Zm00001d002639	Zm00001d026091	4	0	15	0	-0.210526	M1
229	Zm00001d002642	Zm00001d026096	19	0	0	0	-1	M1
230	Zm00001d002644	Zm00001d026103	19	0	0	0	-1	M1
231	Zm00001d002650	Zm00001d026111	0	0	0	19	NotExpressed	equal
232	Zm00001d002654	Zm00001d026113	0	0	0	19	NotExpressed	equal
233	Zm00001d002662	Zm00001d026129	0	19	0	0	-1	M2
234	Zm00001d002669	Zm00001d026130	3	6	10	0	0.166205	M2
235	Zm00001d002673	Zm00001d026131	17	0	2	0	-0.894737	M1
236	Zm00001d002703	Zm00001d026153	11	0	8	0	-0.578947	M1
237	Zm00001d002704	Zm00001d026154	19	0	0	0	-1	M1
238	Zm00001d002718	Zm00001d026158	0	0	0	19	NotExpressed	equal
239	Zm00001d002720	Zm00001d026159	0	0	0	19	NotExpressed	equal
240	Zm00001d002725	Zm00001d026165	1	6	12	0	0.0110803	M2
241	Zm00001d002738	Zm00001d026178	9	1	0	9	0.04	M1
242	Zm00001d002738	Zm00001d026177	9	0	0	10	-1	M1
243	Zm00001d002739	Zm00001d026176	0	3	16	0	-0.157895	M2
244	Zm00001d002743	Zm00001d026173	1	16	2	0	0.0110803	M2
245	Zm00001d002744	Zm00001d026182	0	18	0	1	-1	M2
246	Zm00001d002747	Zm00001d026182	0	18	0	1	-1	M2
247	Zm00001d002748	Zm00001d026184	8	0	0	11	-1	M1
248	Zm00001d002757	Zm00001d026189	6	0	13	0	-0.315789	M1
249	Zm00001d002758	Zm00001d026190	1	2	16	0	0.0110803	M2
250	Zm00001d002762	Zm00001d026191	0	0	0	19	NotExpressed	equal
251	Zm00001d002781	Zm00001d025981	0	19	0	0	-1	M2
252	Zm00001d002782	Zm00001d025982	19	0	0	0	-1	M1
253	Zm00001d002784	Zm00001d025985	1	11	7	0	0.0110803	M2
254	Zm00001d002790	Zm00001d025988	0	0	0	19	NotExpressed	equal
255	Zm00001d002796	Zm00001d025991	1	13	5	0	0.0110803	M2
256	Zm00001d002797	Zm00001d025977	16	0	2	1	-0.888889	M1
257	Zm00001d002797	Zm00001d025977	16	0	2	1	-0.888889	M1
258	Zm00001d002798	Zm00001d025967	18	0	1	0	-0.947368	M1
259	Zm00001d002801	Zm00001d025960	0	12	0	7	-1	M2
260	Zm00001d002802	Zm00001d025959	14	0	0	5	-1	M1
261	Zm00001d002806	Zm00001d025957	0	0	0	19	NotExpressed	equal
262	Zm00001d002810	Zm00001d025955	19	0	0	0	-1	M1
263	Zm00001d002811	Zm00001d025953	0	0	0	19	NotExpressed	equal
264	Zm00001d002815	Zm00001d025952	9	5	5	0	0.454294	M1
265	Zm00001d002817	Zm00001d025951	17	0	0	2	-1	M1
266	Zm00001d002819	Zm00001d025950	0	0	0	19	NotExpressed	equal
267	Zm00001d002822	Zm00001d025948	17	0	2	0	-0.894737	M1
268	Zm00001d002827	Zm00001d025946	1	4	14	0	0.0110803	M2
269	Zm00001d002830	Zm00001d025943	0	15	0	4	-1	M2
270	Zm00001d002842	Zm00001d025932	19	0	0	0	-1	M1
271	Zm00001d002847	Zm00001d025922	19	0	0	0	-1	M1
272	Zm00001d002847	Zm00001d025923	19	0	0	0	-1	M1
273	Zm00001d002847	Zm00001d025924	16	2	1	0	0.199446	M1
274	Zm00001d002848	Zm00001d025922	10	1	4	4	0.0177778	M1
275	Zm00001d002849	Zm00001d025918	9	0	0	10	-1	M1
276	Zm00001d002856	Zm00001d025916	6	3	10	0	0.166205	M1
277	Zm00001d002865	Zm00001d025911	9	2	8	0	0.121884	M1
278	Zm00001d002869	Zm00001d025908	9	2	8	0	0.121884	M1
279	Zm00001d002880	Zm00001d026675	0	19	0	0	-1	M2
280	Zm00001d002882	Zm00001d026678	15	0	4	0	-0.789474	M1
281	Zm00001d002889	Zm00001d026680	0	0	19	0	0	equal
282	Zm00001d002898	Zm00001d026683	0	14	0	5	-1	M2
283	Zm00001d002933	Zm00001d026691	0	17	2	0	-0.894737	M2
284	Zm00001d002936	Zm00001d026696	2	1	16	0	0.0110803	M1
285	Zm00001d002954	Zm00001d025905	9	1	9	0	0.0110803	M1
286	Zm00001d002956	Zm00001d025903	1	6	12	0	0.0110803	M2
287	Zm00001d002958	Zm00001d025901	0	19	0	0	-1	M2
288	Zm00001d002959	Zm00001d025900	0	19	0	0	-1	M2
289	Zm00001d002962	Zm00001d025894	2	0	17	0	-0.105263	M1
290	Zm00001d002967	Zm00001d025892	3	0	16	0	-0.157895	M1
291	Zm00001d002969	Zm00001d025891	14	0	5	0	-0.736842	M1
292	Zm00001d002974	Zm00001d025887	0	16	0	3	-1	M2
293	Zm00001d002974	Zm00001d025887	0	16	0	3	-1	M2
294	Zm00001d002989	Zm00001d025885	0	0	0	19	NotExpressed	equal
295	Zm00001d002996	Zm00001d025874	4	5	8	2	0.262976	M2
296	Zm00001d003009	Zm00001d025872	0	18	1	0	-0.947368	M2
297	Zm00001d003012	Zm00001d025869	12	1	1	5	0.0204082	M1
298	Zm00001d003013	Zm00001d025868	0	14	1	4	-0.933333	M2
299	Zm00001d003014	Zm00001d025866	0	17	2	0	-0.894737	M2
300	Zm00001d003025	Zm00001d025831	0	0	0	19	NotExpressed	equal
301	Zm00001d003041	Zm00001d025842	19	0	0	0	-1	M1
302	Zm00001d003049	Zm00001d025853	8	0	11	0	-0.421053	M1
303	Zm00001d003051	Zm00001d025859	1	0	0	18	-1	M1
304	Zm00001d003052	Zm00001d025861	0	0	0	19	NotExpressed	equal
305	Zm00001d003058	Zm00001d025862	3	6	9	1	0.185185	M2
306	Zm00001d003059	Zm00001d025862	6	7	6	0	0.454294	M2
307	Zm00001d003064	Zm00001d025864	0	0	0	19	NotExpressed	equal
308	Zm00001d003084	Zm00001d025822	19	0	0	0	-1	M1
309	Zm00001d003087	Zm00001d025817	1	0	18	0	-0.0526316	M1
310	Zm00001d003091	Zm00001d025814	9	2	0	8	0.363636	M1
311	Zm00001d003103	Zm00001d025812	4	1	14	0	0.0110803	M1
312	Zm00001d003106	Zm00001d025801	0	10	9	0	-0.526316	M2
313	Zm00001d003110	Zm00001d025799	0	14	5	0	-0.736842	M2
314	Zm00001d003114	Zm00001d025798	14	0	5	0	-0.736842	M1
315	Zm00001d003123	Zm00001d025789	1	1	17	0	0.0110803	equal
316	Zm00001d003124	Zm00001d025786	0	11	8	0	-0.578947	M2
317	Zm00001d003127	Zm00001d025784	19	0	0	0	-1	M1
318	Zm00001d003147	Zm00001d025777	0	0	19	0	0	equal
319	Zm00001d003157	Zm00001d025773	0	0	0	19	NotExpressed	equal
320	Zm00001d003160	Zm00001d025771	5	2	3	9	0.28	M1
321	Zm00001d003162	Zm00001d025770	0	0	0	19	NotExpressed	equal
322	Zm00001d003167	Zm00001d025763	0	19	0	0	-1	M2
323	Zm00001d003172	Zm00001d025762	0	0	19	0	0	equal
324	Zm00001d003174	Zm00001d025761	0	13	6	0	-0.684211	M2
325	Zm00001d003175	Zm00001d025759	14	1	2	2	0.0138408	M1
326	Zm00001d003176	Zm00001d025757	0	0	0	19	NotExpressed	equal
327	Zm00001d003179	Zm00001d025756	19	0	0	0	-1	M1
328	Zm00001d003183	Zm00001d025754	10	1	0	8	0.0330579	M1
329	Zm00001d003183	Zm00001d025754	10	1	0	8	0.0330579	M1
330	Zm00001d003185	Zm00001d025754	19	0	0	0	-1	M1
331	Zm00001d003186	Zm00001d025754	19	0	0	0	-1	M1
332	Zm00001d003186	Zm00001d025754	19	0	0	0	-1	M1
333	Zm00001d003187	Zm00001d025754	17	1	0	1	0.0123457	M1
334	Zm00001d003188	Zm00001d025753	0	0	0	19	NotExpressed	equal
335	Zm00001d003190	Zm00001d025753	0	0	0	19	NotExpressed	equal
336	Zm00001d003190	Zm00001d025753	0	0	0	19	NotExpressed	equal
337	Zm00001d003190	Zm00001d025753	0	0	0	19	NotExpressed	equal
338	Zm00001d003193	Zm00001d025752	3	8	8	0	0.210526	M2
339	Zm00001d003200	Zm00001d025751	19	0	0	0	-1	M1
340	Zm00001d003207	Zm00001d025750	1	0	18	0	-0.0526316	M1
341	Zm00001d003220	Zm00001d025740	18	0	1	0	-0.947368	M1
342	Zm00001d003222	Zm00001d025739	0	19	0	0	-1	M2
343	Zm00001d003228	Zm00001d025735	19	0	0	0	-1	M1
344	Zm00001d003245	Zm00001d025726	0	19	0	0	-1	M2
345	Zm00001d003248	Zm00001d025724	16	0	3	0	-0.842105	M1
346	Zm00001d003249	Zm00001d025721	0	3	16	0	-0.157895	M2
347	Zm00001d003250	Zm00001d025717	0	11	8	0	-0.578947	M2
348	Zm00001d003251	Zm00001d025716	1	3	15	0	0.0110803	M2
349	Zm00001d003254	Zm00001d025715	0	13	6	0	-0.684211	M2
350	Zm00001d003256	Zm00001d025714	0	1	18	0	-0.0526316	M2
351	Zm00001d003258	Zm00001d025713	0	0	0	19	NotExpressed	equal
352	Zm00001d003261	Zm00001d025712	1	2	16	0	0.0110803	M2
353	Zm00001d003266	Zm00001d025710	2	3	14	0	0.0554017	M2
354	Zm00001d003269	Zm00001d025709	10	3	2	4	0.408889	M1
355	Zm00001d003272	Zm00001d025699	19	0	0	0	-1	M1
356	Zm00001d003284	Zm00001d025694	0	19	0	0	-1	M2
357	Zm00001d003288	Zm00001d025692	13	0	6	0	-0.684211	M1
358	Zm00001d003291	Zm00001d025689	0	0	0	19	NotExpressed	equal
359	Zm00001d003293	Zm00001d025684	0	0	0	19	NotExpressed	equal
360	Zm00001d003328	Zm00001d025675	2	6	11	0	0.0886427	M2
361	Zm00001d003329	Zm00001d025673	0	3	16	0	-0.157895	M2
362	Zm00001d003331	Zm00001d025669	0	0	0	19	NotExpressed	equal
363	Zm00001d003333	Zm00001d025668	19	0	0	0	-1	M1
364	Zm00001d003334	Zm00001d025667	9	2	8	0	0.121884	M1
365	Zm00001d003347	Zm00001d025660	0	0	0	19	NotExpressed	equal
366	Zm00001d003352	Zm00001d025658	0	10	9	0	-0.526316	M2
367	Zm00001d003353	Zm00001d025654	10	1	1	7	0.0277778	M1
368	Zm00001d003358	Zm00001d025654	17	0	0	2	-1	M1
369	Zm00001d003363	Zm00001d025654	3	2	0	14	0.8	M1
370	Zm00001d003370	Zm00001d025645	0	0	0	19	NotExpressed	equal
371	Zm00001d003382	Zm00001d025639	0	17	2	0	-0.894737	M2
372	Zm00001d003393	Zm00001d025628	1	0	18	0	-0.0526316	M1
373	Zm00001d003398	Zm00001d025622	0	5	0	14	-1	M2
374	Zm00001d003399	Zm00001d025621	19	0	0	0	-1	M1
375	Zm00001d003401	Zm00001d025617	0	0	0	19	NotExpressed	equal
376	Zm00001d003411	Zm00001d025616	0	19	0	0	-1	M2
377	Zm00001d003431	Zm00001d025588	15	0	0	4	-1	M1
378	Zm00001d003432	Zm00001d025586	3	10	6	0	0.254848	M2
379	Zm00001d003432	Zm00001d025586	3	10	6	0	0.254848	M2
380	Zm00001d003432	Zm00001d025586	3	10	6	0	0.254848	M2
381	Zm00001d003434	Zm00001d025586	0	18	0	1	-1	M2
382	Zm00001d003436	Zm00001d025586	0	18	0	1	-1	M2
383	Zm00001d003438	Zm00001d025581	8	1	10	0	0.0110803	M1
384	Zm00001d003463	Zm00001d025576	5	6	2	6	0.686391	M2
385	Zm00001d003464	Zm00001d025571	0	3	16	0	-0.157895	M2
386	Zm00001d003468	Zm00001d025572	19	0	0	0	-1	M1
387	Zm00001d003470	Zm00001d025574	7	1	11	0	0.0110803	M1
388	Zm00001d003471	Zm00001d025572	3	12	2	2	0.373702	M2
389	Zm00001d003476	Zm00001d025570	4	0	15	0	-0.210526	M1
390	Zm00001d003492	Zm00001d025568	3	6	10	0	0.166205	M2
391	Zm00001d003494	Zm00001d025566	8	1	0	10	0.0493827	M1
392	Zm00001d003494	Zm00001d025566	8	1	0	10	0.0493827	M1
393	Zm00001d003505	Zm00001d025558	17	0	2	0	-0.894737	M1
394	Zm00001d003509	Zm00001d025548	7	0	12	0	-0.368421	M1
395	Zm00001d003510	Zm00001d025547	16	0	1	2	-0.941176	M1
396	Zm00001d003512	Zm00001d025545	19	0	0	0	-1	M1
397	Zm00001d003518	Zm00001d025538	17	0	2	0	-0.894737	M1
398	Zm00001d003524	Zm00001d025533	0	15	1	3	-0.9375	M2
399	Zm00001d003524	Zm00001d025533	0	15	1	3	-0.9375	M2
400	Zm00001d003525	Zm00001d025528	2	6	11	0	0.0886427	M2
401	Zm00001d003525	Zm00001d025528	2	6	11	0	0.0886427	M2
402	Zm00001d003525	Zm00001d025528	2	6	11	0	0.0886427	M2
403	Zm00001d003533	Zm00001d025524	0	0	0	19	NotExpressed	equal
404	Zm00001d003543	Zm00001d025520	1	5	7	6	0.0236686	M2
405	Zm00001d003544	Zm00001d025519	0	0	0	19	NotExpressed	equal
406	Zm00001d003546	Zm00001d025517	0	0	19	0	0	equal
407	Zm00001d003549	Zm00001d025514	0	0	0	19	NotExpressed	equal
408	Zm00001d003552	Zm00001d025509	0	19	0	0	-1	M2
409	Zm00001d003554	Zm00001d025508	1	18	0	0	0.0110803	M2
410	Zm00001d003583	Zm00001d025483	0	0	0	19	NotExpressed	equal
411	Zm00001d003598	Zm00001d025472	5	0	14	0	-0.263158	M1
412	Zm00001d003598	Zm00001d025472	5	0	14	0	-0.263158	M1
413	Zm00001d003611	Zm00001d025461	0	0	19	0	0	equal
414	Zm00001d003612	Zm00001d025453	0	17	0	2	-1	M2
415	Zm00001d003616	Zm00001d025450	3	0	16	0	-0.157895	M1
416	Zm00001d003630	Zm00001d025445	0	8	11	0	-0.421053	M2
417	Zm00001d003646	Zm00001d025433	0	18	1	0	-0.947368	M2
418	Zm00001d003649	Zm00001d025431	2	9	8	0	0.121884	M2
419	Zm00001d003663	Zm00001d025420	19	0	0	0	-1	M1
420	Zm00001d003664	Zm00001d025419	14	0	5	0	-0.736842	M1
421	Zm00001d003669	Zm00001d025414	4	3	12	0	0.121884	M1
422	Zm00001d003672	Zm00001d025413	0	0	19	0	0	equal
423	Zm00001d003674	Zm00001d025412	1	13	3	2	0.0138408	M2
424	Zm00001d003685	Zm00001d025407	12	0	7	0	-0.631579	M1
425	Zm00001d003707	Zm00001d025402	0	0	0	19	NotExpressed	equal
426	Zm00001d003712	Zm00001d025401	0	0	0	19	NotExpressed	equal
427	Zm00001d003712	Zm00001d025401	0	0	0	19	NotExpressed	equal
428	Zm00001d003713	Zm00001d025398	0	7	12	0	-0.368421	M2
429	Zm00001d003725	Zm00001d025406	0	0	0	19	NotExpressed	equal
430	Zm00001d003742	Zm00001d025375	19	0	0	0	-1	M1
431	Zm00001d003743	Zm00001d025374	17	0	0	2	-1	M1
432	Zm00001d003749	Zm00001d025373	3	10	4	2	0.318339	M2
433	Zm00001d003751	Zm00001d025371	15	2	2	0	0.188366	M1
434	Zm00001d003754	Zm00001d025369	0	13	3	3	-0.8125	M2
435	Zm00001d003761	Zm00001d025367	16	0	0	3	-1	M1
436	Zm00001d003773	Zm00001d025359	0	0	19	0	0	equal
437	Zm00001d003797	Zm00001d025352	0	19	0	0	-1	M2
438	Zm00001d003806	Zm00001d025345	11	0	7	1	-0.611111	M1
439	Zm00001d003812	Zm00001d025342	0	7	12	0	-0.368421	M2
440	Zm00001d003822	Zm00001d025339	0	0	0	19	NotExpressed	equal
441	Zm00001d003829	Zm00001d025337	15	1	3	0	0.0110803	M1
442	Zm00001d003830	Zm00001d025333	0	13	0	6	-1	M2
443	Zm00001d003848	Zm00001d025326	9	2	6	2	0.152249	M1
444	Zm00001d003850	Zm00001d025319	15	0	4	0	-0.789474	M1
445	Zm00001d003852	Zm00001d025310	1	9	9	0	0.0110803	M2
446	Zm00001d003852	Zm00001d025310	1	9	9	0	0.0110803	M2
447	Zm00001d003852	Zm00001d025310	1	9	9	0	0.0110803	M2
448	Zm00001d003857	Zm00001d025305	0	0	0	19	NotExpressed	equal
449	Zm00001d003861	Zm00001d025303	17	1	1	0	0.0110803	M1
450	Zm00001d003864	Zm00001d025300	0	10	9	0	-0.526316	M2
451	Zm00001d003871	Zm00001d025298	0	0	0	19	NotExpressed	equal
452	Zm00001d003872	Zm00001d025294	0	7	12	0	-0.368421	M2
453	Zm00001d003877	Zm00001d025287	10	0	0	9	-1	M1
454	Zm00001d003884	Zm00001d025281	0	0	0	19	NotExpressed	equal
455	Zm00001d003889	Zm00001d025275	7	2	8	2	0.124567	M1
456	Zm00001d003890	Zm00001d025274	0	13	6	0	-0.684211	M2
457	Zm00001d003894	Zm00001d025273	0	9	10	0	-0.473684	M2
458	Zm00001d003904	Zm00001d025271	19	0	0	0	-1	M1
459	Zm00001d003911	Zm00001d025268	18	0	1	0	-0.947368	M1
460	Zm00001d003913	Zm00001d025267	0	0	0	19	NotExpressed	equal
461	Zm00001d003928	Zm00001d025252	5	0	14	0	-0.263158	M1
462	Zm00001d003929	Zm00001d025251	12	0	0	7	-1	M1
463	Zm00001d003930	Zm00001d025247	10	2	6	1	0.148148	M1
464	Zm00001d003945	Zm00001d025241	0	17	0	2	-1	M2
465	Zm00001d003947	Zm00001d025240	19	0	0	0	-1	M1
466	Zm00001d003947	Zm00001d025240	19	0	0	0	-1	M1
467	Zm00001d003948	Zm00001d025238	5	4	7	3	0.296875	M1
468	Zm00001d003949	Zm00001d025237	0	15	4	0	-0.789474	M2
469	Zm00001d003950	Zm00001d025237	2	2	15	0	0.0443213	equal
470	Zm00001d003957	Zm00001d025236	7	0	12	0	-0.368421	M1
471	Zm00001d003958	Zm00001d025235	0	0	0	19	NotExpressed	equal
472	Zm00001d003975	Zm00001d025228	1	4	14	0	0.0110803	M2
473	Zm00001d003981	Zm00001d025225	1	12	5	1	0.0123457	M2
474	Zm00001d003993	Zm00001d025218	17	0	2	0	-0.894737	M1
475	Zm00001d003996	Zm00001d025208	1	16	2	0	0.0110803	M2
476	Zm00001d004007	Zm00001d025205	0	0	0	19	NotExpressed	equal
477	Zm00001d004019	Zm00001d025170	0	0	0	19	NotExpressed	equal
478	Zm00001d004022	Zm00001d025171	0	11	8	0	-0.578947	M2
479	Zm00001d004023	Zm00001d025178	3	0	16	0	-0.157895	M1
480	Zm00001d004036	Zm00001d025182	1	5	13	0	0.0110803	M2
481	Zm00001d004042	Zm00001d025201	19	0	0	0	-1	M1
482	Zm00001d004070	Zm00001d025165	0	4	15	0	-0.210526	M2
483	Zm00001d004091	Zm00001d025130	19	0	0	0	-1	M1
484	Zm00001d004125	Zm00001d024998	0	0	0	19	NotExpressed	equal
485	Zm00001d004152	Zm00001d025085	19	0	0	0	-1	M1
486	Zm00001d004169	Zm00001d025098	1	0	18	0	-0.0526316	M1
487	Zm00001d004172	Zm00001d025100	0	17	2	0	-0.894737	M2
488	Zm00001d004198	Zm00001d025126	7	1	11	0	0.0110803	M1
489	Zm00001d004203	Zm00001d025099	0	9	3	7	-0.75	M2
490	Zm00001d004293	Zm00001d025025	2	1	16	0	0.0110803	M1
491	Zm00001d004300	Zm00001d025027	0	4	15	0	-0.210526	M2
492	Zm00001d004335	Zm00001d025031	3	13	1	2	0.401384	M2
493	Zm00001d004339	Zm00001d025034	0	15	4	0	-0.789474	M2
494	Zm00001d004357	Zm00001d025055	0	0	0	19	NotExpressed	equal
495	Zm00001d004361	Zm00001d025043	13	2	4	0	0.166205	M1
496	Zm00001d004361	Zm00001d025043	13	2	4	0	0.166205	M1
497	Zm00001d004366	Zm00001d025037	3	9	6	1	0.259259	M2
498	Zm00001d004372	Zm00001d025050	0	0	0	19	NotExpressed	equal
499	Zm00001d004383	Zm00001d025048	0	19	0	0	-1	M2
500	Zm00001d004396	Zm00001d025044	2	3	14	0	0.0554017	M2
501	Zm00001d004437	Zm00001d024872	2	0	1	16	-0.666667	M1
502	Zm00001d004439	Zm00001d024866	6	1	0	12	0.0816327	M1
503	Zm00001d004496	Zm00001d024879	0	0	0	19	NotExpressed	equal
504	Zm00001d004497	Zm00001d024883	1	13	0	5	0.0204082	M2
505	Zm00001d004517	Zm00001d024889	0	1	18	0	-0.0526316	M2
506	Zm00001d004541	Zm00001d024928	0	17	0	2	-1	M2
507	Zm00001d004543	Zm00001d024933	0	1	18	0	-0.0526316	M2
508	Zm00001d004545	Zm00001d024934	0	17	2	0	-0.894737	M2
509	Zm00001d004546	Zm00001d024935	5	1	13	0	0.0110803	M1
510	Zm00001d004547	Zm00001d024937	0	18	1	0	-0.947368	M2
511	Zm00001d004551	Zm00001d024938	0	8	11	0	-0.421053	M2
512	Zm00001d004552	Zm00001d024939	11	0	8	0	-0.578947	M1
513	Zm00001d004552	Zm00001d024939	11	0	8	0	-0.578947	M1
514	Zm00001d004553	Zm00001d024940	0	9	10	0	-0.473684	M2
515	Zm00001d004554	Zm00001d024941	6	1	11	1	0.0123457	M1
516	Zm00001d004557	Zm00001d024947	8	1	8	2	0.0138408	M1
517	Zm00001d004561	Zm00001d024951	0	0	0	19	NotExpressed	equal
518	Zm00001d004564	Zm00001d024952	18	0	0	1	-1	M1
519	Zm00001d014355	Zm00001d036570	19	0	0	0	-1	M1
520	Zm00001d014358	Zm00001d036571	2	0	17	0	-0.105263	M1
521	Zm00001d014360	Zm00001d036573	0	12	7	0	-0.631579	M2
522	Zm00001d014368	Zm00001d036588	8	2	1	8	0.330579	M1
523	Zm00001d014377	Zm00001d036593	0	0	0	19	NotExpressed	equal
524	Zm00001d014378	Zm00001d036594	18	0	1	0	-0.947368	M1
525	Zm00001d014381	Zm00001d036597	0	10	9	0	-0.526316	M2
526	Zm00001d014382	Zm00001d036598	15	0	4	0	-0.789474	M1
527	Zm00001d014412	Zm00001d036610	14	0	5	0	-0.736842	M1
528	Zm00001d014462	Zm00001d036567	0	19	0	0	-1	M2
529	Zm00001d014472	Zm00001d036560	0	0	19	0	0	equal
530	Zm00001d014495	Zm00001d036558	1	13	5	0	0.0110803	M2
531	Zm00001d014513	Zm00001d036550	13	0	6	0	-0.684211	M1
532	Zm00001d014519	Zm00001d036547	19	0	0	0	-1	M1
533	Zm00001d014525	Zm00001d036543	0	14	5	0	-0.736842	M2
534	Zm00001d014550	Zm00001d036546	0	18	1	0	-0.947368	M2
535	Zm00001d014553	Zm00001d036533	0	17	2	0	-0.894737	M2
536	Zm00001d014557	Zm00001d036534	0	3	0	16	-1	M2
537	Zm00001d014564	Zm00001d036535	0	0	0	19	NotExpressed	equal
538	Zm00001d014565	Zm00001d036536	19	0	0	0	-1	M1
539	Zm00001d014584	Zm00001d036531	1	4	14	0	0.0110803	M2
540	Zm00001d014587	Zm00001d036529	10	1	8	0	0.0110803	M1
541	Zm00001d014594	Zm00001d036524	0	9	10	0	-0.473684	M2
542	Zm00001d014597	Zm00001d036522	0	7	0	12	-1	M2
543	Zm00001d014640	Zm00001d036507	18	0	1	0	-0.947368	M1
544	Zm00001d014641	Zm00001d036506	19	0	0	0	-1	M1
545	Zm00001d014655	Zm00001d036495	1	1	17	0	0.0110803	equal
546	Zm00001d014656	Zm00001d036494	0	0	0	19	NotExpressed	equal
547	Zm00001d014664	Zm00001d036485	8	0	11	0	-0.421053	M1
548	Zm00001d014665	Zm00001d036483	14	0	5	0	-0.736842	M1
549	Zm00001d014668	Zm00001d036482	0	0	19	0	0	equal
550	Zm00001d014671	Zm00001d036481	0	18	1	0	-0.947368	M2
551	Zm00001d014673	Zm00001d036480	0	0	0	19	NotExpressed	equal
552	Zm00001d014674	Zm00001d036477	0	19	0	0	-1	M2
553	Zm00001d014679	Zm00001d036467	0	9	0	10	-1	M2
554	Zm00001d014683	Zm00001d036462	1	16	2	0	0.0110803	M2
555	Zm00001d014726	Zm00001d036448	18	0	1	0	-0.947368	M1
556	Zm00001d014729	Zm00001d036443	1	6	12	0	0.0110803	M2
557	Zm00001d014732	Zm00001d036442	0	0	19	0	0	equal
558	Zm00001d014732	Zm00001d036442	0	0	19	0	0	equal
559	Zm00001d014733	Zm00001d036441	7	0	12	0	-0.368421	M1
560	Zm00001d014735	Zm00001d036439	17	0	2	0	-0.894737	M1
561	Zm00001d014737	Zm00001d036439	8	1	10	0	0.0110803	M1
562	Zm00001d014753	Zm00001d036432	12	0	7	0	-0.631579	M1
563	Zm00001d014757	Zm00001d036431	15	0	4	0	-0.789474	M1
564	Zm00001d014757	Zm00001d036431	15	0	4	0	-0.789474	M1
565	Zm00001d014760	Zm00001d036429	6	1	12	0	0.0110803	M1
566	Zm00001d014761	Zm00001d036428	4	1	14	0	0.0110803	M1
567	Zm00001d014764	Zm00001d036422	2	1	16	0	0.0110803	M1
568	Zm00001d014765	Zm00001d036418	0	0	0	19	NotExpressed	equal
569	Zm00001d014773	Zm00001d036416	0	0	0	19	NotExpressed	equal
570	Zm00001d014775	Zm00001d036410	6	0	13	0	-0.315789	M1
571	Zm00001d014785	Zm00001d036403	0	19	0	0	-1	M2
572	Zm00001d014789	Zm00001d036402	3	3	13	0	0.099723	equal
573	Zm00001d014792	Zm00001d036401	0	7	12	0	-0.368421	M2
574	Zm00001d014793	Zm00001d036398	0	4	0	15	-1	M2
575	Zm00001d014795	Zm00001d036400	0	0	0	19	NotExpressed	equal
576	Zm00001d014797	Zm00001d036395	0	7	12	0	-0.368421	M2
577	Zm00001d014809	Zm00001d036387	13	0	6	0	-0.684211	M1
578	Zm00001d014811	Zm00001d036387	1	4	14	0	0.0110803	M2
579	Zm00001d014814	Zm00001d036382	0	19	0	0	-1	M2
580	Zm00001d014843	Zm00001d036364	0	0	0	19	NotExpressed	equal
581	Zm00001d014867	Zm00001d036351	0	12	7	0	-0.631579	M2
582	Zm00001d014897	Zm00001d036331	19	0	0	0	-1	M1
583	Zm00001d014912	Zm00001d054106	0	0	0	19	NotExpressed	equal
584	Zm00001d014938	Zm00001d054080	0	0	0	19	NotExpressed	equal
585	Zm00001d014943	Zm00001d054076	3	2	14	0	0.0554017	M1
586	Zm00001d014943	Zm00001d054076	3	2	14	0	0.0554017	M1
587	Zm00001d014947	Zm00001d054075	0	13	0	6	-1	M2
588	Zm00001d014949	Zm00001d054074	4	8	7	0	0.310249	M2
589	Zm00001d014950	Zm00001d054072	0	3	16	0	-0.157895	M2
590	Zm00001d014952	Zm00001d054071	5	2	11	1	0.0864198	M1
591	Zm00001d014961	Zm00001d054069	5	0	14	0	-0.263158	M1
592	Zm00001d014965	Zm00001d054066	0	18	1	0	-0.947368	M2
593	Zm00001d014969	Zm00001d054065	2	0	17	0	-0.105263	M1
594	Zm00001d014976	Zm00001d054060	0	3	0	16	-1	M2
595	Zm00001d014976	Zm00001d054060	0	3	0	16	-1	M2
596	Zm00001d014976	Zm00001d054060	0	3	0	16	-1	M2
597	Zm00001d014988	Zm00001d054047	1	2	16	0	0.0110803	M2
598	Zm00001d014993	Zm00001d054043	0	0	0	19	NotExpressed	equal
599	Zm00001d014994	Zm00001d054039	4	1	14	0	0.0110803	M1
600	Zm00001d014995	Zm00001d054038	0	0	0	19	NotExpressed	equal
601	Zm00001d015006	Zm00001d054017	0	16	3	0	-0.842105	M2
602	Zm00001d015007	Zm00001d054016	1	8	10	0	0.0110803	M2
603	Zm00001d015007	Zm00001d054016	1	8	10	0	0.0110803	M2
604	Zm00001d015012	Zm00001d054014	6	0	13	0	-0.315789	M1
605	Zm00001d015036	Zm00001d053899	0	0	0	19	NotExpressed	equal
606	Zm00001d015037	Zm00001d053901	4	3	12	0	0.121884	M1
607	Zm00001d015058	Zm00001d053919	0	6	13	0	-0.315789	M2
608	Zm00001d015061	Zm00001d053923	0	18	1	0	-0.947368	M2
609	Zm00001d015084	Zm00001d053939	19	0	0	0	-1	M1
610	Zm00001d015088	Zm00001d053960	14	0	5	0	-0.736842	M1
611	Zm00001d015091	Zm00001d053952	17	0	2	0	-0.894737	M1
612	Zm00001d015095	Zm00001d053953	19	0	0	0	-1	M1
613	Zm00001d015103	Zm00001d053957	0	14	5	0	-0.736842	M2
614	Zm00001d015116	Zm00001d053966	1	0	18	0	-0.0526316	M1
615	Zm00001d015118	Zm00001d053967	0	0	0	19	NotExpressed	equal
616	Zm00001d015120	Zm00001d053968	4	0	15	0	-0.210526	M1
617	Zm00001d015125	Zm00001d053976	2	3	14	0	0.0554017	M2
618	Zm00001d015127	Zm00001d053979	0	10	9	0	-0.526316	M2
619	Zm00001d015134	Zm00001d053983	17	0	2	0	-0.894737	M1
620	Zm00001d015135	Zm00001d053984	1	3	15	0	0.0110803	M2
621	Zm00001d015141	Zm00001d053985	2	3	14	0	0.0554017	M2
622	Zm00001d015148	Zm00001d053987	7	0	12	0	-0.368421	M1
623	Zm00001d015153	Zm00001d053988	0	0	0	19	NotExpressed	equal
624	Zm00001d015174	Zm00001d053994	1	6	12	0	0.0110803	M2
625	Zm00001d015184	Zm00001d053996	1	3	15	0	0.0110803	M2
626	Zm00001d015186	Zm00001d054000	17	0	2	0	-0.894737	M1
627	Zm00001d015209	Zm00001d054003	4	1	14	0	0.0110803	M1
628	Zm00001d015229	Zm00001d054001	0	19	0	0	-1	M2
629	Zm00001d015233	Zm00001d053890	0	0	0	19	NotExpressed	equal
630	Zm00001d015234	Zm00001d053889	19	0	0	0	-1	M1
631	Zm00001d015234	Zm00001d053889	19	0	0	0	-1	M1
632	Zm00001d015247	Zm00001d053883	9	1	9	0	0.0110803	M1
633	Zm00001d015248	Zm00001d053882	19	0	0	0	-1	M1
634	Zm00001d015259	Zm00001d053881	0	18	1	0	-0.947368	M2
635	Zm00001d015293	Zm00001d053875	0	0	19	0	0	equal
636	Zm00001d015298	Zm00001d053867	1	7	0	11	0.0625	M2
637	Zm00001d015298	Zm00001d053867	1	7	0	11	0.0625	M2
638	Zm00001d015298	Zm00001d053867	1	7	0	11	0.0625	M2
639	Zm00001d015300	Zm00001d053865	19	0	0	0	-1	M1
640	Zm00001d015301	Zm00001d053863	0	19	0	0	-1	M2
641	Zm00001d015306	Zm00001d053856	18	0	1	0	-0.947368	M1
642	Zm00001d015319	Zm00001d053848	2	0	17	0	-0.105263	M1
643	Zm00001d015327	Zm00001d053834	0	19	0	0	-1	M2
644	Zm00001d015327	Zm00001d053834	0	19	0	0	-1	M2
645	Zm00001d015327	Zm00001d053838	0	0	0	19	NotExpressed	equal
646	Zm00001d015338	Zm00001d053817	19	0	0	0	-1	M1
647	Zm00001d015354	Zm00001d053815	19	0	0	0	-1	M1
648	Zm00001d015366	Zm00001d053807	0	17	0	2	-1	M2
649	Zm00001d015366	Zm00001d053807	0	17	0	2	-1	M2
650	Zm00001d015378	Zm00001d053800	1	0	18	0	-0.0526316	M1
651	Zm00001d015383	Zm00001d053798	19	0	0	0	-1	M1
652	Zm00001d015397	Zm00001d053781	3	6	10	0	0.166205	M2
653	Zm00001d015401	Zm00001d053778	9	0	10	0	-0.473684	M1
654	Zm00001d015406	Zm00001d053776	1	17	1	0	0.0110803	M2
655	Zm00001d015410	Zm00001d053775	0	0	0	19	NotExpressed	equal
656	Zm00001d015414	Zm00001d053769	5	1	2	11	0.0625	M1
657	Zm00001d015426	Zm00001d053765	11	0	0	8	-1	M1
658	Zm00001d015429	Zm00001d053763	0	0	19	0	0	equal
659	Zm00001d015433	Zm00001d053762	2	0	17	0	-0.105263	M1
660	Zm00001d015435	Zm00001d053761	3	1	15	0	0.0110803	M1
661	Zm00001d015460	Zm00001d053754	0	0	19	0	0	equal
662	Zm00001d015464	Zm00001d053753	19	0	0	0	-1	M1
663	Zm00001d015473	Zm00001d053731	6	0	13	0	-0.315789	M1
664	Zm00001d015474	Zm00001d053732	1	5	13	0	0.0110803	M2
665	Zm00001d015475	Zm00001d053734	1	14	2	2	0.0138408	M2
666	Zm00001d015491	Zm00001d053739	0	19	0	0	-1	M2
667	Zm00001d015493	Zm00001d053741	0	0	0	19	NotExpressed	equal
668	Zm00001d015505	Zm00001d053743	18	0	1	0	-0.947368	M1
669	Zm00001d015515	Zm00001d053746	0	19	0	0	-1	M2
670	Zm00001d015546	Zm00001d053748	15	1	3	0	0.0110803	M1
671	Zm00001d015549	Zm00001d053749	0	0	0	19	NotExpressed	equal
672	Zm00001d015550	Zm00001d053750	3	4	2	10	0.54321	M2
673	Zm00001d015550	Zm00001d053750	3	4	2	10	0.54321	M2
674	Zm00001d015568	Zm00001d053728	0	0	19	0	0	equal
675	Zm00001d015569	Zm00001d053727	19	0	0	0	-1	M1
676	Zm00001d015581	Zm00001d053725	3	4	12	0	0.121884	M2
677	Zm00001d015586	Zm00001d053724	3	0	16	0	-0.157895	M1
678	Zm00001d015600	Zm00001d053719	7	0	12	0	-0.368421	M1
679	Zm00001d015605	Zm00001d053718	0	19	0	0	-1	M2
680	Zm00001d015613	Zm00001d053716	19	0	0	0	-1	M1
681	Zm00001d015623	Zm00001d053715	0	18	1	0	-0.947368	M2
682	Zm00001d015628	Zm00001d053713	1	18	0	0	0.0110803	M2
683	Zm00001d015635	Zm00001d053709	5	0	14	0	-0.263158	M1
684	Zm00001d015635	Zm00001d053709	5	0	14	0	-0.263158	M1
685	Zm00001d015639	Zm00001d053707	0	0	0	19	NotExpressed	equal
686	Zm00001d015656	Zm00001d053705	19	0	0	0	-1	M1
687	Zm00001d015664	Zm00001d053703	0	0	0	19	NotExpressed	equal
688	Zm00001d015665	Zm00001d053702	0	19	0	0	-1	M2
689	Zm00001d015686	Zm00001d053699	5	5	7	2	0.346021	equal
690	Zm00001d015721	Zm00001d053617	11	0	0	8	-1	M1
691	Zm00001d015729	Zm00001d053620	3	0	16	0	-0.157895	M1
692	Zm00001d015737	Zm00001d053622	4	0	15	0	-0.210526	M1
693	Zm00001d015767	Zm00001d053639	19	0	0	0	-1	M1
694	Zm00001d015776	Zm00001d053641	0	7	12	0	-0.368421	M2
695	Zm00001d015778	Zm00001d053642	13	0	6	0	-0.684211	M1
696	Zm00001d015780	Zm00001d053643	9	0	10	0	-0.473684	M1
697	Zm00001d015785	Zm00001d053648	0	18	1	0	-0.947368	M2
698	Zm00001d015788	Zm00001d053649	0	19	0	0	-1	M2
699	Zm00001d015798	Zm00001d053655	9	0	1	9	-0.9	M1
700	Zm00001d015825	Zm00001d053662	0	3	0	16	-1	M2
701	Zm00001d015837	Zm00001d053664	6	1	12	0	0.0110803	M1
702	Zm00001d015839	Zm00001d053667	4	3	12	0	0.121884	M1
703	Zm00001d015842	Zm00001d053671	0	1	18	0	-0.0526316	M2
704	Zm00001d015851	Zm00001d053674	4	0	15	0	-0.210526	M1
705	Zm00001d015856	Zm00001d053685	0	19	0	0	-1	M2
706	Zm00001d015863	Zm00001d053694	19	0	0	0	-1	M1
707	Zm00001d015884	Zm00001d053695	0	19	0	0	-1	M2
708	Zm00001d015918	Zm00001d053346	18	0	1	0	-0.947368	M1
709	Zm00001d015952	Zm00001d053289	17	0	2	0	-0.894737	M1
710	Zm00001d015965	Zm00001d053298	19	0	0	0	-1	M1
711	Zm00001d015992	Zm00001d053308	0	16	3	0	-0.842105	M2
712	Zm00001d016001	Zm00001d053307	8	1	0	10	0.0493827	M1
713	Zm00001d016044	Zm00001d053372	1	4	14	0	0.0110803	M2
714	Zm00001d016049	Zm00001d053371	0	19	0	0	-1	M2
715	Zm00001d016052	Zm00001d053369	0	0	0	19	NotExpressed	equal
716	Zm00001d016061	Zm00001d053359	0	17	2	0	-0.894737	M2
717	Zm00001d016062	Zm00001d053352	4	5	4	6	0.449704	M2
718	Zm00001d016063	Zm00001d053354	0	7	12	0	-0.368421	M2
719	Zm00001d016066	Zm00001d053358	4	1	14	0	0.0110803	M1
720	Zm00001d016072	Zm00001d053377	1	7	11	0	0.0110803	M2
721	Zm00001d016075	Zm00001d053378	10	1	8	0	0.0110803	M1
722	Zm00001d016081	Zm00001d053382	2	5	12	0	0.0775623	M2
723	Zm00001d016084	Zm00001d053379	5	0	14	0	-0.263158	M1
724	Zm00001d016103	Zm00001d053393	7	4	3	5	0.510204	M1
725	Zm00001d016105	Zm00001d053396	2	4	13	0	0.066482	M2
726	Zm00001d016106	Zm00001d053399	0	2	17	0	-0.105263	M2
727	Zm00001d016120	Zm00001d053410	12	0	0	7	-1	M1
728	Zm00001d016130	Zm00001d053425	18	0	1	0	-0.947368	M1
729	Zm00001d016131	Zm00001d053427	18	0	1	0	-0.947368	M1
730	Zm00001d016132	Zm00001d053429	0	4	0	15	-1	M2
731	Zm00001d016136	Zm00001d053433	0	15	0	4	-1	M2
732	Zm00001d016149	Zm00001d053438	5	0	14	0	-0.263158	M1
733	Zm00001d016149	Zm00001d053438	5	0	14	0	-0.263158	M1
734	Zm00001d016154	Zm00001d053442	0	0	0	19	NotExpressed	equal
735	Zm00001d016163	Zm00001d053447	1	7	10	1	0.0123457	M2
736	Zm00001d016164	Zm00001d053448	0	12	7	0	-0.631579	M2
737	Zm00001d016165	Zm00001d053450	0	4	15	0	-0.210526	M2
738	Zm00001d016166	Zm00001d053453	0	0	0	19	NotExpressed	equal
739	Zm00001d016177	Zm00001d053554	0	3	0	16	-1	M2
740	Zm00001d016177	Zm00001d053554	0	3	0	16	-1	M2
741	Zm00001d016181	Zm00001d053552	8	0	11	0	-0.421053	M1
742	Zm00001d016182	Zm00001d053554	19	0	0	0	-1	M1
743	Zm00001d016185	Zm00001d053554	14	1	0	4	0.0177778	M1
744	Zm00001d016188	Zm00001d053548	2	0	17	0	-0.105263	M1
745	Zm00001d016200	Zm00001d053547	2	0	17	0	-0.105263	M1
746	Zm00001d016200	Zm00001d053547	2	0	17	0	-0.105263	M1
747	Zm00001d016200	Zm00001d053547	2	0	17	0	-0.105263	M1
748	Zm00001d016225	Zm00001d053544	8	3	8	0	0.210526	M1
749	Zm00001d016234	Zm00001d053541	2	11	6	0	0.144044	M2
750	Zm00001d016306	Zm00001d053562	19	0	0	0	-1	M1
751	Zm00001d016307	Zm00001d053562	0	15	2	2	-0.882353	M2
752	Zm00001d016308	Zm00001d053563	0	19	0	0	-1	M2
753	Zm00001d016326	Zm00001d053564	0	5	14	0	-0.263158	M2
754	Zm00001d016332	Zm00001d053566	3	8	8	0	0.210526	M2
755	Zm00001d016342	Zm00001d053568	11	0	4	4	-0.733333	M1
756	Zm00001d016349	Zm00001d053572	0	9	10	0	-0.473684	M2
757	Zm00001d016358	Zm00001d053576	6	0	13	0	-0.315789	M1
758	Zm00001d016365	Zm00001d053580	0	19	0	0	-1	M2
759	Zm00001d016378	Zm00001d053589	0	1	18	0	-0.0526316	M2
760	Zm00001d016381	Zm00001d053595	5	0	0	14	-1	M1
761	Zm00001d016402	Zm00001d053609	1	1	17	0	0.0110803	equal
762	Zm00001d016402	Zm00001d053609	1	1	17	0	0.0110803	equal
763	Zm00001d016406	Zm00001d053610	0	14	5	0	-0.736842	M2
764	Zm00001d016407	Zm00001d053611	0	6	13	0	-0.315789	M2
765	Zm00001d016409	Zm00001d053612	0	17	0	2	-1	M2
766	Zm00001d016409	Zm00001d053612	0	17	0	2	-1	M2
767	Zm00001d016410	Zm00001d053613	18	0	1	0	-0.947368	M1
768	Zm00001d016439	Zm00001d053616	5	0	14	0	-0.263158	M1
769	Zm00001d016491	Zm00001d053239	19	0	0	0	-1	M1
770	Zm00001d016491	Zm00001d053239	19	0	0	0	-1	M1
771	Zm00001d016496	Zm00001d053245	19	0	0	0	-1	M1
772	Zm00001d016516	Zm00001d053251	0	18	1	0	-0.947368	M2
773	Zm00001d016545	Zm00001d050544	2	8	9	0	0.110803	M2
774	Zm00001d016552	Zm00001d050551	0	11	8	0	-0.578947	M2
775	Zm00001d016561	Zm00001d050557	10	1	2	6	0.0236686	M1
776	Zm00001d016572	Zm00001d050567	0	0	0	19	NotExpressed	equal
777	Zm00001d016586	Zm00001d050580	11	2	5	1	0.160494	M1
778	Zm00001d016590	Zm00001d050577	0	0	0	19	NotExpressed	equal
779	Zm00001d016591	Zm00001d050575	3	0	16	0	-0.157895	M1
780	Zm00001d016604	Zm00001d050583	11	2	6	0	0.144044	M1
781	Zm00001d016606	Zm00001d050584	18	0	1	0	-0.947368	M1
782	Zm00001d016634	Zm00001d050604	5	0	14	0	-0.263158	M1
783	Zm00001d016640	Zm00001d050606	0	8	11	0	-0.421053	M2
784	Zm00001d016665	Zm00001d050637	18	0	1	0	-0.947368	M1
785	Zm00001d016718	Zm00001d050671	15	1	1	2	0.0138408	M1
786	Zm00001d016719	Zm00001d050689	19	0	0	0	-1	M1
787	Zm00001d016720	Zm00001d050694	19	0	0	0	-1	M1
788	Zm00001d016722	Zm00001d050696	16	0	3	0	-0.842105	M1
789	Zm00001d016723	Zm00001d050697	19	0	0	0	-1	M1
790	Zm00001d016732	Zm00001d050669	0	19	0	0	-1	M2
791	Zm00001d016736	Zm00001d050666	0	7	12	0	-0.368421	M2
792	Zm00001d016737	Zm00001d050664	0	0	0	19	NotExpressed	equal
793	Zm00001d016755	Zm00001d050698	2	7	9	1	0.111111	M2
794	Zm00001d016756	Zm00001d050700	19	0	0	0	-1	M1
795	Zm00001d016758	Zm00001d050705	11	0	8	0	-0.578947	M1
796	Zm00001d016764	Zm00001d050712	4	7	3	5	0.510204	M2
797	Zm00001d016766	Zm00001d050715	1	14	3	1	0.0123457	M2
798	Zm00001d016768	Zm00001d050716	11	0	8	0	-0.578947	M1
799	Zm00001d016783	Zm00001d050723	0	0	0	19	NotExpressed	equal
800	Zm00001d016793	Zm00001d050730	0	0	0	19	NotExpressed	equal
801	Zm00001d016822	Zm00001d050737	0	2	17	0	-0.105263	M2
802	Zm00001d016825	Zm00001d050741	0	2	17	0	-0.105263	M2
803	Zm00001d016826	Zm00001d050748	1	15	3	0	0.0110803	M2
804	Zm00001d016827	Zm00001d050753	0	0	0	19	NotExpressed	equal
805	Zm00001d016832	Zm00001d050755	0	14	5	0	-0.736842	M2
806	Zm00001d016834	Zm00001d050775	17	0	0	2	-1	M1
807	Zm00001d016838	Zm00001d050781	0	0	0	19	NotExpressed	equal
808	Zm00001d016850	Zm00001d050783	0	8	0	11	-1	M2
809	Zm00001d016851	Zm00001d050785	0	19	0	0	-1	M2
810	Zm00001d016856	Zm00001d050800	0	19	0	0	-1	M2
811	Zm00001d016856	Zm00001d050800	0	19	0	0	-1	M2
812	Zm00001d016861	Zm00001d050816	0	0	0	19	NotExpressed	equal
813	Zm00001d016895	Zm00001d050837	2	10	6	1	0.148148	M2
814	Zm00001d016897	Zm00001d050838	1	9	9	0	0.0110803	M2
815	Zm00001d016902	Zm00001d050844	19	0	0	0	-1	M1
816	Zm00001d016909	Zm00001d050848	0	7	0	12	-1	M2
817	Zm00001d016915	Zm00001d050850	9	2	7	1	0.135802	M1
818	Zm00001d016916	Zm00001d050851	3	0	16	0	-0.157895	M1
819	Zm00001d016928	Zm00001d050868	0	0	0	19	NotExpressed	equal
820	Zm00001d016935	Zm00001d050874	0	19	0	0	-1	M2
821	Zm00001d016938	Zm00001d050873	0	0	0	19	NotExpressed	equal
822	Zm00001d016941	Zm00001d050884	10	0	9	0	-0.526316	M1
823	Zm00001d016950	Zm00001d050893	0	0	0	19	NotExpressed	equal
824	Zm00001d016957	Zm00001d050897	0	0	0	19	NotExpressed	equal
825	Zm00001d016973	Zm00001d050903	0	12	7	0	-0.631579	M2
826	Zm00001d016977	Zm00001d050905	10	0	9	0	-0.526316	M1
827	Zm00001d016980	Zm00001d050907	7	1	11	0	0.0110803	M1
828	Zm00001d016992	Zm00001d050908	10	2	1	6	0.284024	M1
829	Zm00001d016993	Zm00001d050910	3	2	14	0	0.0554017	M1
830	Zm00001d016999	Zm00001d050913	13	1	5	0	0.0110803	M1
831	Zm00001d017026	Zm00001d050915	19	0	0	0	-1	M1
832	Zm00001d017036	Zm00001d050917	10	1	8	0	0.0110803	M1
833	Zm00001d017047	Zm00001d050920	19	0	0	0	-1	M1
834	Zm00001d017049	Zm00001d050923	0	19	0	0	-1	M2
835	Zm00001d017050	Zm00001d050925	0	6	13	0	-0.315789	M2
836	Zm00001d017060	Zm00001d050935	6	0	13	0	-0.315789	M1
837	Zm00001d017067	Zm00001d050943	0	4	15	0	-0.210526	M2
838	Zm00001d017070	Zm00001d050944	0	0	19	0	0	equal
839	Zm00001d017077	Zm00001d050955	0	10	0	9	-1	M2
840	Zm00001d017077	Zm00001d050955	0	10	0	9	-1	M2
841	Zm00001d017079	Zm00001d050959	19	0	0	0	-1	M1
842	Zm00001d017084	Zm00001d050960	0	0	0	19	NotExpressed	equal
843	Zm00001d017085	Zm00001d050961	1	2	16	0	0.0110803	M2
844	Zm00001d017089	Zm00001d050963	16	1	1	1	0.0123457	M1
845	Zm00001d017090	Zm00001d050964	0	1	18	0	-0.0526316	M2
846	Zm00001d017091	Zm00001d050965	2	0	17	0	-0.105263	M1
847	Zm00001d017092	Zm00001d050969	17	0	2	0	-0.894737	M1
848	Zm00001d017096	Zm00001d050970	13	0	6	0	-0.684211	M1
849	Zm00001d017100	Zm00001d050978	6	0	13	0	-0.315789	M1
850	Zm00001d017106	Zm00001d050981	19	0	0	0	-1	M1
851	Zm00001d017107	Zm00001d050988	5	8	6	0	0.409972	M2
852	Zm00001d017111	Zm00001d050992	0	0	0	19	NotExpressed	equal
853	Zm00001d017120	Zm00001d050993	10	0	9	0	-0.526316	M1
854	Zm00001d017121	Zm00001d051001	0	0	0	19	NotExpressed	equal
855	Zm00001d017144	Zm00001d051014	12	0	7	0	-0.631579	M1
856	Zm00001d017145	Zm00001d051015	0	14	5	0	-0.736842	M2
857	Zm00001d017146	Zm00001d051016	1	0	18	0	-0.0526316	M1
858	Zm00001d017147	Zm00001d051018	0	0	0	19	NotExpressed	equal
859	Zm00001d017151	Zm00001d051020	2	0	17	0	-0.105263	M1
860	Zm00001d017168	Zm00001d051043	0	19	0	0	-1	M2
861	Zm00001d017176	Zm00001d051047	0	18	0	1	-1	M2
862	Zm00001d017177	Zm00001d051052	1	0	18	0	-0.0526316	M1
863	Zm00001d017178	Zm00001d051053	3	5	11	0	0.144044	M2
864	Zm00001d017187	Zm00001d051062	2	0	17	0	-0.105263	M1
865	Zm00001d017193	Zm00001d051065	0	9	10	0	-0.473684	M2
866	Zm00001d017197	Zm00001d051067	16	0	3	0	-0.842105	M1
867	Zm00001d017201	Zm00001d051069	2	6	11	0	0.0886427	M2
868	Zm00001d017204	Zm00001d051080	14	0	5	0	-0.736842	M1
869	Zm00001d017205	Zm00001d051081	1	1	17	0	0.0110803	equal
870	Zm00001d017206	Zm00001d051082	1	3	15	0	0.0110803	M2
871	Zm00001d017239	Zm00001d051112	9	0	10	0	-0.473684	M1
872	Zm00001d017239	Zm00001d051112	9	0	10	0	-0.473684	M1
873	Zm00001d017241	Zm00001d051114	2	5	11	1	0.0864198	M2
874	Zm00001d017242	Zm00001d051116	18	0	1	0	-0.947368	M1
875	Zm00001d017247	Zm00001d051119	3	6	10	0	0.166205	M2
876	Zm00001d017248	Zm00001d051121	1	18	0	0	0.0110803	M2
877	Zm00001d017256	Zm00001d051128	6	3	9	1	0.185185	M1
878	Zm00001d017258	Zm00001d051129	1	0	18	0	-0.0526316	M1
879	Zm00001d017261	Zm00001d051135	0	4	15	0	-0.210526	M2
880	Zm00001d017268	Zm00001d051149	0	0	0	19	NotExpressed	equal
881	Zm00001d017270	Zm00001d051156	0	0	0	19	NotExpressed	equal
882	Zm00001d017271	Zm00001d051157	19	0	0	0	-1	M1
883	Zm00001d017274	Zm00001d051161	0	0	0	19	NotExpressed	equal
884	Zm00001d017275	Zm00001d051163	19	0	0	0	-1	M1
885	Zm00001d017279	Zm00001d051166	0	1	0	18	-1	M2
886	Zm00001d017279	Zm00001d051166	0	1	0	18	-1	M2
887	Zm00001d017284	Zm00001d051172	18	0	0	1	-1	M1
888	Zm00001d017288	Zm00001d051174	0	0	0	19	NotExpressed	equal
889	Zm00001d017296	Zm00001d051178	0	5	14	0	-0.263158	M2
890	Zm00001d017298	Zm00001d051180	1	15	3	0	0.0110803	M2
891	Zm00001d017303	Zm00001d051183	0	15	4	0	-0.789474	M2
892	Zm00001d017323	Zm00001d051193	0	19	0	0	-1	M2
893	Zm00001d017330	Zm00001d051203	0	12	7	0	-0.631579	M2
894	Zm00001d017333	Zm00001d051206	9	1	4	5	0.0204082	M1
895	Zm00001d017335	Zm00001d051207	18	0	1	0	-0.947368	M1
896	Zm00001d017336	Zm00001d051211	0	19	0	0	-1	M2
897	Zm00001d017352	Zm00001d051214	0	0	0	19	NotExpressed	equal
898	Zm00001d017352	Zm00001d051214	0	0	0	19	NotExpressed	equal
899	Zm00001d017352	Zm00001d051214	0	0	0	19	NotExpressed	equal
900	Zm00001d017353	Zm00001d051223	9	4	6	0	0.34349	M1
901	Zm00001d017353	Zm00001d051225	14	2	2	1	0.197531	M1
902	Zm00001d017360	Zm00001d051232	19	0	0	0	-1	M1
903	Zm00001d017361	Zm00001d051234	0	17	2	0	-0.894737	M2
904	Zm00001d017366	Zm00001d051239	0	0	0	19	NotExpressed	equal
905	Zm00001d017371	Zm00001d051241	4	3	12	0	0.121884	M1
906	Zm00001d017373	Zm00001d051242	12	1	6	0	0.0110803	M1
907	Zm00001d017379	Zm00001d051250	5	1	13	0	0.0110803	M1
908	Zm00001d017381	Zm00001d051251	5	2	12	0	0.0775623	M1
909	Zm00001d017383	Zm00001d051267	0	0	0	19	NotExpressed	equal
910	Zm00001d017390	Zm00001d051288	13	3	3	0	0.32133	M1
911	Zm00001d017392	Zm00001d051291	1	8	10	0	0.0110803	M2
912	Zm00001d017397	Zm00001d051302	0	19	0	0	-1	M2
913	Zm00001d017401	Zm00001d051306	0	14	5	0	-0.736842	M2
914	Zm00001d017403	Zm00001d051307	0	0	0	19	NotExpressed	equal
915	Zm00001d017412	Zm00001d051309	0	19	0	0	-1	M2
916	Zm00001d017419	Zm00001d051314	19	0	0	0	-1	M1
917	Zm00001d017420	Zm00001d051316	0	0	0	19	NotExpressed	equal
918	Zm00001d017424	Zm00001d051321	1	0	18	0	-0.0526316	M1
919	Zm00001d017448	Zm00001d051329	0	10	9	0	-0.526316	M2
920	Zm00001d017455	Zm00001d051333	3	8	3	5	0.387755	M2
921	Zm00001d017456	Zm00001d051336	0	19	0	0	-1	M2
922	Zm00001d017460	Zm00001d051337	0	18	1	0	-0.947368	M2
923	Zm00001d017461	Zm00001d051338	14	1	4	0	0.0110803	M1
924	Zm00001d017466	Zm00001d051340	0	9	0	10	-1	M2
925	Zm00001d017473	Zm00001d051343	8	0	11	0	-0.421053	M1
926	Zm00001d017474	Zm00001d051344	8	3	8	0	0.210526	M1
927	Zm00001d017477	Zm00001d051355	0	0	0	19	NotExpressed	equal
928	Zm00001d017478	Zm00001d051350	0	0	0	19	NotExpressed	equal
929	Zm00001d017480	Zm00001d051355	0	0	0	19	NotExpressed	equal
930	Zm00001d017482	Zm00001d051360	12	0	7	0	-0.631579	M1
931	Zm00001d017485	Zm00001d051362	0	0	0	19	NotExpressed	equal
932	Zm00001d017486	Zm00001d051365	0	8	0	11	-1	M2
933	Zm00001d017491	Zm00001d051366	1	5	13	0	0.0110803	M2
934	Zm00001d017501	Zm00001d051374	19	0	0	0	-1	M1
935	Zm00001d017505	Zm00001d051383	15	0	4	0	-0.789474	M1
936	Zm00001d017508	Zm00001d051384	0	0	0	19	NotExpressed	equal
937	Zm00001d017508	Zm00001d051384	0	0	0	19	NotExpressed	equal
938	Zm00001d017508	Zm00001d051384	0	0	0	19	NotExpressed	equal
939	Zm00001d017508	Zm00001d051384	0	0	0	19	NotExpressed	equal
940	Zm00001d017508	Zm00001d051384	0	0	0	19	NotExpressed	equal
941	Zm00001d017513	Zm00001d051387	0	0	0	19	NotExpressed	equal
942	Zm00001d017513	Zm00001d051387	0	0	0	19	NotExpressed	equal
943	Zm00001d017516	Zm00001d051388	1	7	2	9	0.04	M2
944	Zm00001d017523	Zm00001d051394	19	0	0	0	-1	M1
945	Zm00001d017525	Zm00001d051404	8	0	11	0	-0.421053	M1
946	Zm00001d017526	Zm00001d051403	0	0	0	19	NotExpressed	equal
947	Zm00001d017534	Zm00001d051410	4	9	4	2	0.429066	M2
948	Zm00001d017535	Zm00001d051411	1	11	3	4	0.0177778	M2
949	Zm00001d017539	Zm00001d051415	19	0	0	0	-1	M1
950	Zm00001d017540	Zm00001d051416	0	16	0	3	-1	M2
951	Zm00001d017547	Zm00001d051420	0	19	0	0	-1	M2
952	Zm00001d017550	Zm00001d051421	0	18	1	0	-0.947368	M2
953	Zm00001d017555	Zm00001d051427	0	0	0	19	NotExpressed	equal
954	Zm00001d017558	Zm00001d051429	14	0	5	0	-0.736842	M1
955	Zm00001d017568	Zm00001d051431	2	1	16	0	0.0110803	M1
956	Zm00001d017575	Zm00001d051439	0	0	0	19	NotExpressed	equal
957	Zm00001d017583	Zm00001d051442	0	19	0	0	-1	M2
958	Zm00001d017591	Zm00001d051451	0	0	0	19	NotExpressed	equal
959	Zm00001d017607	Zm00001d051457	0	19	0	0	-1	M2
960	Zm00001d017608	Zm00001d051458	0	0	0	19	NotExpressed	equal
961	Zm00001d017612	Zm00001d051460	1	4	14	0	0.0110803	M2
962	Zm00001d017615	Zm00001d051468	16	0	3	0	-0.842105	M1
963	Zm00001d017622	Zm00001d051475	19	0	0	0	-1	M1
964	Zm00001d017625	Zm00001d051474	13	1	5	0	0.0110803	M1
965	Zm00001d017641	Zm00001d051479	1	16	2	0	0.0110803	M2
966	Zm00001d017642	Zm00001d051480	0	0	0	19	NotExpressed	equal
967	Zm00001d017645	Zm00001d051501	19	0	0	0	-1	M1
968	Zm00001d017646	Zm00001d051496	0	19	0	0	-1	M2
969	Zm00001d017647	Zm00001d051495	7	0	0	12	-1	M1
970	Zm00001d017648	Zm00001d051492	11	0	0	8	-1	M1
971	Zm00001d017648	Zm00001d051492	11	0	0	8	-1	M1
972	Zm00001d017649	Zm00001d051484	16	0	3	0	-0.842105	M1
973	Zm00001d017657	Zm00001d051505	2	12	4	1	0.17284	M2
974	Zm00001d017660	Zm00001d051507	1	4	14	0	0.0110803	M2
975	Zm00001d017677	Zm00001d051509	0	0	0	19	NotExpressed	equal
976	Zm00001d017682	Zm00001d051511	0	0	0	19	NotExpressed	equal
977	Zm00001d017686	Zm00001d051513	3	9	7	0	0.232687	M2
978	Zm00001d017698	Zm00001d051525	3	5	11	0	0.144044	M2
979	Zm00001d017698	Zm00001d051525	3	5	11	0	0.144044	M2
980	Zm00001d017699	Zm00001d051526	19	0	0	0	-1	M1
981	Zm00001d017702	Zm00001d051527	0	0	0	19	NotExpressed	equal
982	Zm00001d017703	Zm00001d051528	0	1	18	0	-0.0526316	M2
983	Zm00001d017707	Zm00001d051535	13	0	5	1	-0.722222	M1
984	Zm00001d017712	Zm00001d051550	0	0	0	19	NotExpressed	equal
985	Zm00001d017717	Zm00001d051546	3	5	11	0	0.144044	M2
986	Zm00001d017718	Zm00001d051544	2	12	5	0	0.155125	M2
987	Zm00001d017719	Zm00001d051543	0	8	11	0	-0.421053	M2
988	Zm00001d017720	Zm00001d051542	0	12	7	0	-0.631579	M2
989	Zm00001d017748	Zm00001d051552	0	19	0	0	-1	M2
990	Zm00001d017755	Zm00001d051553	17	0	2	0	-0.894737	M1
991	Zm00001d017762	Zm00001d051554	0	0	0	19	NotExpressed	equal
992	Zm00001d017767	Zm00001d051561	0	6	11	2	-0.352941	M2
993	Zm00001d017768	Zm00001d051562	19	0	0	0	-1	M1
994	Zm00001d017769	Zm00001d051563	18	0	1	0	-0.947368	M1
995	Zm00001d017770	Zm00001d051564	2	5	12	0	0.0775623	M2
996	Zm00001d017773	Zm00001d051568	0	0	0	19	NotExpressed	equal
997	Zm00001d017778	Zm00001d051569	0	0	0	19	NotExpressed	equal
998	Zm00001d017783	Zm00001d051572	15	0	4	0	-0.789474	M1
999	Zm00001d017784	Zm00001d051573	0	0	0	19	NotExpressed	equal
1000	Zm00001d017788	Zm00001d051577	0	0	0	19	NotExpressed	equal
1001	Zm00001d017789	Zm00001d051585	10	1	8	0	0.0110803	M1
1002	Zm00001d017790	Zm00001d051586	0	16	3	0	-0.842105	M2
1003	Zm00001d017793	Zm00001d051589	9	0	10	0	-0.473684	M1
1004	Zm00001d017798	Zm00001d051590	19	0	0	0	-1	M1
1005	Zm00001d017800	Zm00001d051592	6	2	3	8	0.264463	M1
1006	Zm00001d017807	Zm00001d051606	3	12	1	3	0.421875	M2
1007	Zm00001d017809	Zm00001d051607	19	0	0	0	-1	M1
1008	Zm00001d017821	Zm00001d051615	2	10	6	1	0.148148	M2
1009	Zm00001d017825	Zm00001d051620	0	8	2	9	-0.8	M2
1010	Zm00001d017829	Zm00001d051627	9	0	10	0	-0.473684	M1
1011	Zm00001d017830	Zm00001d051629	3	2	14	0	0.0554017	M1
1012	Zm00001d017831	Zm00001d051632	0	0	0	19	NotExpressed	equal
1013	Zm00001d017832	Zm00001d051633	0	10	9	0	-0.526316	M2
1014	Zm00001d017833	Zm00001d051634	16	0	3	0	-0.842105	M1
1015	Zm00001d017840	Zm00001d051636	0	18	1	0	-0.947368	M2
1016	Zm00001d017840	Zm00001d051636	0	18	1	0	-0.947368	M2
1017	Zm00001d017845	Zm00001d051642	19	0	0	0	-1	M1
1018	Zm00001d017848	Zm00001d051644	19	0	0	0	-1	M1
1019	Zm00001d017850	Zm00001d051662	19	0	0	0	-1	M1
1020	Zm00001d017851	Zm00001d051658	14	1	3	1	0.0123457	M1
1021	Zm00001d017852	Zm00001d051653	18	0	1	0	-0.947368	M1
1022	Zm00001d017857	Zm00001d051685	0	0	0	19	NotExpressed	equal
1023	Zm00001d017859	Zm00001d051687	4	0	15	0	-0.210526	M1
1024	Zm00001d017860	Zm00001d051688	7	2	10	0	0.099723	M1
1025	Zm00001d017861	Zm00001d051689	0	7	12	0	-0.368421	M2
1026	Zm00001d017862	Zm00001d051690	0	19	0	0	-1	M2
1027	Zm00001d017864	Zm00001d051692	9	0	0	10	-1	M1
1028	Zm00001d017872	Zm00001d051671	18	0	1	0	-0.947368	M1
1029	Zm00001d017874	Zm00001d051672	0	2	17	0	-0.105263	M2
1030	Zm00001d017876	Zm00001d051674	1	5	13	0	0.0110803	M2
1031	Zm00001d017877	Zm00001d051675	13	0	6	0	-0.684211	M1
1032	Zm00001d017877	Zm00001d051675	13	0	6	0	-0.684211	M1
1033	Zm00001d017881	Zm00001d051676	0	1	18	0	-0.0526316	M2
1034	Zm00001d017882	Zm00001d051677	14	0	5	0	-0.736842	M1
1035	Zm00001d017882	Zm00001d051677	14	0	5	0	-0.736842	M1
1036	Zm00001d017883	Zm00001d051678	15	0	4	0	-0.789474	M1
1037	Zm00001d017885	Zm00001d051684	0	0	0	19	NotExpressed	equal
1038	Zm00001d017887	Zm00001d051652	10	0	9	0	-0.526316	M1
1039	Zm00001d017896	Zm00001d051696	5	0	0	14	-1	M1
1040	Zm00001d017896	Zm00001d051670	0	18	0	1	-1	M2
1041	Zm00001d017900	Zm00001d051700	0	0	0	19	NotExpressed	equal
1042	Zm00001d017905	Zm00001d051702	0	0	0	19	NotExpressed	equal
1043	Zm00001d017913	Zm00001d051741	15	3	1	0	0.365651	M1
1044	Zm00001d017914	Zm00001d051741	19	0	0	0	-1	M1
1045	Zm00001d017920	Zm00001d051749	19	0	0	0	-1	M1
1046	Zm00001d017925	Zm00001d051756	1	4	14	0	0.0110803	M2
1047	Zm00001d017926	Zm00001d051759	12	0	7	0	-0.631579	M1
1048	Zm00001d017927	Zm00001d051760	0	1	18	0	-0.0526316	M2
1049	Zm00001d017941	Zm00001d051787	15	1	3	0	0.0110803	M1
1050	Zm00001d017947	Zm00001d051789	3	6	10	0	0.166205	M2
1051	Zm00001d017951	Zm00001d051799	18	1	0	0	0.0110803	M1
1052	Zm00001d017953	Zm00001d051800	12	0	7	0	-0.631579	M1
1053	Zm00001d017956	Zm00001d051803	4	0	15	0	-0.210526	M1
1054	Zm00001d017958	Zm00001d051804	0	0	0	19	NotExpressed	equal
1055	Zm00001d017959	Zm00001d051806	19	0	0	0	-1	M1
1056	Zm00001d017960	Zm00001d051808	19	0	0	0	-1	M1
1057	Zm00001d017969	Zm00001d051810	7	0	0	12	-1	M1
1058	Zm00001d017977	Zm00001d051812	0	17	0	2	-1	M2
1059	Zm00001d017978	Zm00001d051814	19	0	0	0	-1	M1
1060	Zm00001d017984	Zm00001d052292	19	0	0	0	-1	M1
1061	Zm00001d017985	Zm00001d052289	19	0	0	0	-1	M1
1062	Zm00001d017986	Zm00001d052288	0	0	0	19	NotExpressed	equal
1063	Zm00001d017998	Zm00001d052277	0	8	10	1	-0.444444	M2
1064	Zm00001d018004	Zm00001d052273	0	0	0	19	NotExpressed	equal
1065	Zm00001d018004	Zm00001d052276	0	19	0	0	-1	M2
1066	Zm00001d018005	Zm00001d052271	7	0	12	0	-0.368421	M1
1067	Zm00001d018024	Zm00001d052269	0	0	0	19	NotExpressed	equal
1068	Zm00001d018028	Zm00001d052268	19	0	0	0	-1	M1
1069	Zm00001d018031	Zm00001d052264	0	19	0	0	-1	M2
1070	Zm00001d018033	Zm00001d052263	2	10	7	0	0.132964	M2
1071	Zm00001d018037	Zm00001d052261	0	16	0	3	-1	M2
1072	Zm00001d018040	Zm00001d052259	1	0	18	0	-0.0526316	M1
1073	Zm00001d018041	Zm00001d052258	1	0	18	0	-0.0526316	M1
1074	Zm00001d018045	Zm00001d052256	0	9	0	10	-1	M2
1075	Zm00001d018056	Zm00001d052254	0	0	0	19	NotExpressed	equal
1076	Zm00001d018058	Zm00001d052252	0	18	1	0	-0.947368	M2
1077	Zm00001d018060	Zm00001d052245	19	0	0	0	-1	M1
1078	Zm00001d018061	Zm00001d052247	3	0	16	0	-0.157895	M1
1079	Zm00001d018064	Zm00001d052243	0	9	0	10	-1	M2
1080	Zm00001d018064	Zm00001d052243	0	9	0	10	-1	M2
1081	Zm00001d018064	Zm00001d052243	0	9	0	10	-1	M2
1082	Zm00001d018069	Zm00001d052242	0	13	0	6	-1	M2
1083	Zm00001d018072	Zm00001d052239	0	4	15	0	-0.210526	M2
1084	Zm00001d018074	Zm00001d052237	1	1	17	0	0.0110803	equal
1085	Zm00001d018076	Zm00001d052234	18	0	1	0	-0.947368	M1
1086	Zm00001d018078	Zm00001d052232	3	0	1	15	-0.75	M1
1087	Zm00001d018081	Zm00001d052229	0	0	0	19	NotExpressed	equal
1088	Zm00001d018082	Zm00001d052227	0	0	0	19	NotExpressed	equal
1089	Zm00001d018085	Zm00001d052225	0	19	0	0	-1	M2
1090	Zm00001d018087	Zm00001d052223	1	1	1	16	0.444444	equal
1091	Zm00001d018088	Zm00001d052221	11	4	1	3	0.578125	M1
1092	Zm00001d018089	Zm00001d052220	16	0	1	2	-0.941176	M1
1093	Zm00001d018096	Zm00001d052216	19	0	0	0	-1	M1
1094	Zm00001d018099	Zm00001d052215	0	0	0	19	NotExpressed	equal
1095	Zm00001d018103	Zm00001d052212	19	0	0	0	-1	M1
1096	Zm00001d018104	Zm00001d052208	0	16	3	0	-0.842105	M2
1097	Zm00001d018105	Zm00001d052206	0	19	0	0	-1	M2
1098	Zm00001d018105	Zm00001d052206	0	19	0	0	-1	M2
1099	Zm00001d018105	Zm00001d052206	0	19	0	0	-1	M2
1100	Zm00001d018107	Zm00001d052205	14	0	5	0	-0.736842	M1
1101	Zm00001d018111	Zm00001d052200	15	0	4	0	-0.789474	M1
1102	Zm00001d018112	Zm00001d052198	19	0	0	0	-1	M1
1103	Zm00001d018113	Zm00001d052193	8	0	11	0	-0.421053	M1
1104	Zm00001d018117	Zm00001d052190	18	0	0	1	-1	M1
1105	Zm00001d018118	Zm00001d052191	8	5	2	4	0.657778	M1
1106	Zm00001d018119	Zm00001d052192	0	0	0	19	NotExpressed	equal
1107	Zm00001d018122	Zm00001d052189	5	6	8	0	0.32133	M2
1108	Zm00001d018126	Zm00001d052188	8	0	11	0	-0.421053	M1
1109	Zm00001d018127	Zm00001d052186	0	19	0	0	-1	M2
1110	Zm00001d018128	Zm00001d052185	0	7	12	0	-0.368421	M2
1111	Zm00001d018130	Zm00001d052184	13	3	3	0	0.32133	M1
1112	Zm00001d018142	Zm00001d052180	0	0	0	19	NotExpressed	equal
1113	Zm00001d018149	Zm00001d052174	0	0	0	19	NotExpressed	equal
1114	Zm00001d018150	Zm00001d052173	5	3	1	10	0.641975	M1
1115	Zm00001d018158	Zm00001d052167	0	0	0	19	NotExpressed	equal
1116	Zm00001d018161	Zm00001d052165	11	0	0	8	-1	M1
1117	Zm00001d018177	Zm00001d052162	19	0	0	0	-1	M1
1118	Zm00001d018179	Zm00001d052157	0	1	18	0	-0.0526316	M2
1119	Zm00001d018187	Zm00001d052155	19	0	0	0	-1	M1
1120	Zm00001d018190	Zm00001d052154	0	17	1	1	-0.944444	M2
1121	Zm00001d018191	Zm00001d052152	0	0	0	19	NotExpressed	equal
1122	Zm00001d018199	Zm00001d052149	3	0	16	0	-0.157895	M1
1123	Zm00001d018204	Zm00001d052144	10	0	9	0	-0.526316	M1
1124	Zm00001d018206	Zm00001d052139	11	0	4	4	-0.733333	M1
1125	Zm00001d018207	Zm00001d052138	11	0	8	0	-0.578947	M1
1126	Zm00001d018209	Zm00001d052137	0	19	0	0	-1	M2
1127	Zm00001d018211	Zm00001d052136	0	0	0	19	NotExpressed	equal
1128	Zm00001d018225	Zm00001d052133	0	0	0	19	NotExpressed	equal
1129	Zm00001d018235	Zm00001d052125	10	1	8	0	0.0110803	M1
1130	Zm00001d018237	Zm00001d052124	0	9	0	10	-1	M2
1131	Zm00001d018238	Zm00001d052123	8	8	2	1	0.790123	equal
1132	Zm00001d018246	Zm00001d052120	19	0	0	0	-1	M1
1133	Zm00001d018247	Zm00001d052118	3	5	1	10	0.641975	M2
1134	Zm00001d018260	Zm00001d052112	0	0	0	19	NotExpressed	equal
1135	Zm00001d018277	Zm00001d052108	18	0	1	0	-0.947368	M1
1136	Zm00001d018278	Zm00001d052107	18	0	1	0	-0.947368	M1
1137	Zm00001d018280	Zm00001d052106	12	0	7	0	-0.631579	M1
1138	Zm00001d018281	Zm00001d052104	5	0	0	14	-1	M1
1139	Zm00001d018281	Zm00001d052104	5	0	0	14	-1	M1
1140	Zm00001d018282	Zm00001d052104	18	0	0	1	-1	M1
1141	Zm00001d018288	Zm00001d052102	17	0	0	2	-1	M1
1142	Zm00001d018297	Zm00001d052093	11	0	8	0	-0.578947	M1
1143	Zm00001d018305	Zm00001d052087	0	0	0	19	NotExpressed	equal
1144	Zm00001d018309	Zm00001d052078	0	19	0	0	-1	M2
1145	Zm00001d018316	Zm00001d052070	2	3	14	0	0.0554017	M2
1146	Zm00001d018320	Zm00001d052069	0	0	0	19	NotExpressed	equal
1147	Zm00001d018324	Zm00001d052068	9	4	4	2	0.429066	M1
1148	Zm00001d018326	Zm00001d052066	0	1	18	0	-0.0526316	M2
1149	Zm00001d018332	Zm00001d052064	11	1	3	4	0.0177778	M1
1150	Zm00001d018336	Zm00001d052063	3	3	10	3	0.140625	equal
1151	Zm00001d018340	Zm00001d052063	0	15	0	4	-1	M2
1152	Zm00001d018341	Zm00001d052062	0	18	1	0	-0.947368	M2
1153	Zm00001d018342	Zm00001d052060	0	0	0	19	NotExpressed	equal
1154	Zm00001d018343	Zm00001d052059	10	2	0	7	0.333333	M1
1155	Zm00001d018344	Zm00001d052058	9	2	8	0	0.121884	M1
1156	Zm00001d018349	Zm00001d052056	0	19	0	0	-1	M2
1157	Zm00001d018350	Zm00001d052053	3	1	15	0	0.0110803	M1
1158	Zm00001d018361	Zm00001d052050	0	19	0	0	-1	M2
1159	Zm00001d018365	Zm00001d052043	9	1	9	0	0.0110803	M1
1160	Zm00001d018372	Zm00001d052035	2	8	1	8	0.330579	M2
1161	Zm00001d018372	Zm00001d052035	2	8	1	8	0.330579	M2
1162	Zm00001d018372	Zm00001d052035	2	8	1	8	0.330579	M2
1163	Zm00001d018374	Zm00001d052038	19	0	0	0	-1	M1
1164	Zm00001d018382	Zm00001d052028	0	19	0	0	-1	M2
1165	Zm00001d018383	Zm00001d052025	0	19	0	0	-1	M2
1166	Zm00001d018384	Zm00001d052021	0	18	0	1	-1	M2
1167	Zm00001d018391	Zm00001d052019	19	0	0	0	-1	M1
1168	Zm00001d018394	Zm00001d052018	0	0	0	19	NotExpressed	equal
1169	Zm00001d018400	Zm00001d052016	1	14	3	1	0.0123457	M2
1170	Zm00001d018400	Zm00001d052015	0	17	2	0	-0.894737	M2
1171	Zm00001d018404	Zm00001d052011	12	2	5	0	0.155125	M1
1172	Zm00001d018410	Zm00001d052003	13	0	6	0	-0.684211	M1
1173	Zm00001d018413	Zm00001d052001	17	0	2	0	-0.894737	M1
1174	Zm00001d018415	Zm00001d051995	0	0	0	19	NotExpressed	equal
1175	Zm00001d018418	Zm00001d051987	19	0	0	0	-1	M1
1176	Zm00001d018419	Zm00001d051986	12	0	7	0	-0.631579	M1
1177	Zm00001d018421	Zm00001d051981	0	0	0	19	NotExpressed	equal
1178	Zm00001d018428	Zm00001d051977	0	15	4	0	-0.789474	M2
1179	Zm00001d018430	Zm00001d051976	17	0	0	2	-1	M1
1180	Zm00001d018432	Zm00001d051967	0	9	10	0	-0.473684	M2
1181	Zm00001d018440	Zm00001d051951	0	2	17	0	-0.105263	M2
1182	Zm00001d018441	Zm00001d051950	14	1	4	0	0.0110803	M1
1183	Zm00001d018443	Zm00001d051948	0	1	18	0	-0.0526316	M2
1184	Zm00001d018444	Zm00001d051946	4	4	11	0	0.177285	equal
1185	Zm00001d018445	Zm00001d051945	0	0	0	19	NotExpressed	equal
1186	Zm00001d018447	Zm00001d051939	0	18	1	0	-0.947368	M2
1187	Zm00001d018451	Zm00001d051936	11	1	6	1	0.0123457	M1
1188	Zm00001d018472	Zm00001d051925	1	3	15	0	0.0110803	M2
1189	Zm00001d018477	Zm00001d051917	15	0	4	0	-0.789474	M1
1190	Zm00001d018483	Zm00001d051914	5	0	0	14	-1	M1
1191	Zm00001d018484	Zm00001d051913	0	2	17	0	-0.105263	M2
1192	Zm00001d018485	Zm00001d051912	6	4	9	0	0.243767	M1
1193	Zm00001d018489	Zm00001d051906	17	0	2	0	-0.894737	M1
1194	Zm00001d018496	Zm00001d051902	4	3	12	0	0.121884	M1
1195	Zm00001d018497	Zm00001d051901	0	8	11	0	-0.421053	M2
1196	Zm00001d018499	Zm00001d051900	2	3	14	0	0.0554017	M2
1197	Zm00001d018502	Zm00001d051899	3	9	4	3	0.328125	M2
1198	Zm00001d018503	Zm00001d051898	11	0	0	8	-1	M1
1199	Zm00001d018506	Zm00001d051890	0	14	5	0	-0.736842	M2
1200	Zm00001d018512	Zm00001d051882	19	0	0	0	-1	M1
1201	Zm00001d018514	Zm00001d051881	0	18	1	0	-0.947368	M2
1202	Zm00001d018515	Zm00001d051861	0	0	19	0	0	equal
1203	Zm00001d018524	Zm00001d051856	0	16	3	0	-0.842105	M2
1204	Zm00001d018542	Zm00001d051840	17	0	2	0	-0.894737	M1
1205	Zm00001d018554	Zm00001d051836	0	19	0	0	-1	M2
1206	Zm00001d018639	Zm00001d007937	18	0	0	1	-1	M1
1207	Zm00001d018657	Zm00001d007943	9	0	10	0	-0.473684	M1
1208	Zm00001d018664	Zm00001d007947	0	19	0	0	-1	M2
1209	Zm00001d018669	Zm00001d007951	0	0	0	19	NotExpressed	equal
1210	Zm00001d018694	Zm00001d007960	0	0	19	0	0	equal
1211	Zm00001d018698	Zm00001d007962	17	0	0	2	-1	M1
1212	Zm00001d018699	Zm00001d007961	0	9	10	0	-0.473684	M2
1213	Zm00001d018716	Zm00001d007973	3	4	1	11	0.6875	M2
1214	Zm00001d018716	Zm00001d007973	3	4	1	11	0.6875	M2
1215	Zm00001d018716	Zm00001d007973	3	4	1	11	0.6875	M2
1216	Zm00001d018717	Zm00001d007974	8	1	2	8	0.0330579	M1
1217	Zm00001d018730	Zm00001d007839	10	0	9	0	-0.526316	M1
1218	Zm00001d018749	Zm00001d007845	16	0	3	0	-0.842105	M1
1219	Zm00001d018772	Zm00001d007849	0	19	0	0	-1	M2
1220	Zm00001d018819	Zm00001d007876	0	0	0	19	NotExpressed	equal
1221	Zm00001d018826	Zm00001d007884	0	19	0	0	-1	M2
1222	Zm00001d018827	Zm00001d007885	0	18	0	1	-1	M2
1223	Zm00001d018839	Zm00001d007918	0	0	0	19	NotExpressed	equal
1224	Zm00001d018844	Zm00001d007911	0	13	0	6	-1	M2
1225	Zm00001d018848	Zm00001d007909	14	4	0	1	0.567901	M1
1226	Zm00001d018859	Zm00001d007904	9	0	10	0	-0.473684	M1
1227	Zm00001d018867	Zm00001d007902	6	0	13	0	-0.315789	M1
1228	Zm00001d018868	Zm00001d007901	0	19	0	0	-1	M2
1229	Zm00001d018873	Zm00001d007900	17	0	2	0	-0.894737	M1
1230	Zm00001d018882	Zm00001d007898	0	12	7	0	-0.631579	M2
1231	Zm00001d018884	Zm00001d007897	2	0	17	0	-0.105263	M1
1232	Zm00001d018896	Zm00001d007890	19	0	0	0	-1	M1
1233	Zm00001d018904	Zm00001d007889	0	0	19	0	0	equal
1234	Zm00001d018907	Zm00001d007837	0	6	13	0	-0.315789	M2
1235	Zm00001d018908	Zm00001d007836	4	3	12	0	0.121884	M1
1236	Zm00001d018911	Zm00001d007835	9	0	10	0	-0.473684	M1
1237	Zm00001d018931	Zm00001d007830	0	16	1	2	-0.941176	M2
1238	Zm00001d018940	Zm00001d007827	0	0	0	19	NotExpressed	equal
1239	Zm00001d018944	Zm00001d007826	12	0	7	0	-0.631579	M1
1240	Zm00001d018947	Zm00001d007825	0	18	1	0	-0.947368	M2
1241	Zm00001d018957	Zm00001d007824	0	0	19	0	0	equal
1242	Zm00001d018959	Zm00001d007823	1	7	11	0	0.0110803	M2
1243	Zm00001d018962	Zm00001d007820	0	12	4	3	-0.75	M2
1244	Zm00001d018979	Zm00001d007819	0	3	16	0	-0.157895	M2
1245	Zm00001d018986	Zm00001d007802	3	1	15	0	0.0110803	M1
1246	Zm00001d019034	Zm00001d007800	0	19	0	0	-1	M2
1247	Zm00001d019041	Zm00001d007799	19	0	0	0	-1	M1
1248	Zm00001d019049	Zm00001d007785	1	14	1	3	0.015625	M2
1249	Zm00001d019078	Zm00001d007773	3	7	0	9	0.68	M2
1250	Zm00001d019078	Zm00001d007773	3	7	0	9	0.68	M2
1251	Zm00001d019079	Zm00001d007772	2	3	14	0	0.0554017	M2
1252	Zm00001d019079	Zm00001d007772	2	3	14	0	0.0554017	M2
1253	Zm00001d019087	Zm00001d007770	0	19	0	0	-1	M2
1254	Zm00001d019090	Zm00001d007769	1	0	18	0	-0.0526316	M1
1255	Zm00001d019091	Zm00001d007767	0	0	19	0	0	equal
1256	Zm00001d019093	Zm00001d007763	0	15	4	0	-0.789474	M2
1257	Zm00001d019104	Zm00001d007760	1	0	18	0	-0.0526316	M1
1258	Zm00001d019106	Zm00001d007758	0	1	18	0	-0.0526316	M2
1259	Zm00001d019145	Zm00001d005252	11	0	8	0	-0.578947	M1
1260	Zm00001d019149	Zm00001d005250	0	0	0	19	NotExpressed	equal
1261	Zm00001d019164	Zm00001d005248	0	0	19	0	0	equal
1262	Zm00001d019166	Zm00001d005244	0	0	0	19	NotExpressed	equal
1263	Zm00001d019169	Zm00001d005240	0	0	0	19	NotExpressed	equal
1264	Zm00001d019182	Zm00001d005238	0	1	18	0	-0.0526316	M2
1265	Zm00001d019191	Zm00001d005231	15	0	4	0	-0.789474	M1
1266	Zm00001d019192	Zm00001d005230	5	0	0	14	-1	M1
1267	Zm00001d019194	Zm00001d005229	0	2	17	0	-0.105263	M2
1268	Zm00001d019207	Zm00001d005208	0	0	0	19	NotExpressed	equal
1269	Zm00001d019215	Zm00001d005205	0	1	18	0	-0.0526316	M2
1270	Zm00001d019216	Zm00001d005203	0	19	0	0	-1	M2
1271	Zm00001d019219	Zm00001d005200	0	19	0	0	-1	M2
1272	Zm00001d019233	Zm00001d005182	3	2	14	0	0.0554017	M1
1273	Zm00001d019234	Zm00001d005179	0	19	0	0	-1	M2
1274	Zm00001d019241	Zm00001d005178	15	0	4	0	-0.789474	M1
1275	Zm00001d019254	Zm00001d005456	0	16	0	3	-1	M2
1276	Zm00001d019254	Zm00001d005456	0	16	0	3	-1	M2
1277	Zm00001d019279	Zm00001d005459	0	0	0	19	NotExpressed	equal
1278	Zm00001d019280	Zm00001d005459	19	0	0	0	-1	M1
1279	Zm00001d019283	Zm00001d005460	0	19	0	0	-1	M2
1280	Zm00001d019287	Zm00001d005461	19	0	0	0	-1	M1
1281	Zm00001d019288	Zm00001d005462	0	2	17	0	-0.105263	M2
1282	Zm00001d019298	Zm00001d005468	0	10	9	0	-0.526316	M2
1283	Zm00001d019303	Zm00001d005470	0	19	0	0	-1	M2
1284	Zm00001d019304	Zm00001d005470	0	19	0	0	-1	M2
1285	Zm00001d019304	Zm00001d005470	0	19	0	0	-1	M2
1286	Zm00001d019304	Zm00001d005470	0	19	0	0	-1	M2
1287	Zm00001d019312	Zm00001d005472	0	19	0	0	-1	M2
1288	Zm00001d019312	Zm00001d005472	0	19	0	0	-1	M2
1289	Zm00001d019312	Zm00001d005472	0	19	0	0	-1	M2
1290	Zm00001d019314	Zm00001d005473	3	0	16	0	-0.157895	M1
1291	Zm00001d019317	Zm00001d005478	0	19	0	0	-1	M2
1292	Zm00001d019327	Zm00001d005479	0	16	0	3	-1	M2
1293	Zm00001d019327	Zm00001d005479	0	16	0	3	-1	M2
1294	Zm00001d019363	Zm00001d005501	0	7	12	0	-0.368421	M2
1295	Zm00001d019457	Zm00001d005158	0	0	0	19	NotExpressed	equal
1296	Zm00001d019467	Zm00001d005159	0	3	16	0	-0.157895	M2
1297	Zm00001d019497	Zm00001d005453	0	19	0	0	-1	M2
1298	Zm00001d019497	Zm00001d005453	0	19	0	0	-1	M2
1299	Zm00001d019507	Zm00001d005451	0	19	0	0	-1	M2
1300	Zm00001d019515	Zm00001d005450	1	0	18	0	-0.0526316	M1
1301	Zm00001d019520	Zm00001d005445	7	3	8	1	0.209877	M1
1302	Zm00001d019522	Zm00001d005442	4	0	15	0	-0.210526	M1
1303	Zm00001d019527	Zm00001d005439	0	0	0	19	NotExpressed	equal
1304	Zm00001d019527	Zm00001d005439	0	0	0	19	NotExpressed	equal
1305	Zm00001d019553	Zm00001d005423	19	0	0	0	-1	M1
1306	Zm00001d019563	Zm00001d005421	0	0	0	19	NotExpressed	equal
1307	Zm00001d019565	Zm00001d005410	0	1	0	18	-1	M2
1308	Zm00001d019565	Zm00001d005410	0	1	0	18	-1	M2
1309	Zm00001d019565	Zm00001d005410	0	1	0	18	-1	M2
1310	Zm00001d019576	Zm00001d005396	0	11	8	0	-0.578947	M2
1311	Zm00001d019579	Zm00001d005406	0	0	19	0	0	equal
1312	Zm00001d019595	Zm00001d005395	2	0	17	0	-0.105263	M1
1313	Zm00001d019597	Zm00001d005394	2	0	17	0	-0.105263	M1
1314	Zm00001d019600	Zm00001d005393	2	0	17	0	-0.105263	M1
1315	Zm00001d019637	Zm00001d005373	0	13	6	0	-0.684211	M2
1316	Zm00001d019650	Zm00001d005368	1	0	18	0	-0.0526316	M1
1317	Zm00001d019696	Zm00001d005293	0	0	0	19	NotExpressed	equal
1318	Zm00001d019700	Zm00001d005297	13	0	6	0	-0.684211	M1
1319	Zm00001d019701	Zm00001d005298	3	13	2	1	0.358025	M2
1320	Zm00001d019712	Zm00001d005300	0	0	0	19	NotExpressed	equal
1321	Zm00001d019718	Zm00001d005302	7	1	11	0	0.0110803	M1
1322	Zm00001d019733	Zm00001d005308	0	13	6	0	-0.684211	M2
1323	Zm00001d019734	Zm00001d005309	0	4	0	15	-1	M2
1324	Zm00001d019744	Zm00001d005309	0	4	0	15	-1	M2
1325	Zm00001d019750	Zm00001d005315	0	12	7	0	-0.631579	M2
1326	Zm00001d019759	Zm00001d005317	2	1	16	0	0.0110803	M1
1327	Zm00001d019856	Zm00001d005350	0	8	11	0	-0.421053	M2
1328	Zm00001d019875	Zm00001d005338	0	19	0	0	-1	M2
1329	Zm00001d019968	Zm00001d005516	0	18	1	0	-0.947368	M2
1330	Zm00001d019980	Zm00001d005520	1	4	13	1	0.0123457	M2
1331	Zm00001d019981	Zm00001d005532	2	0	17	0	-0.105263	M1
1332	Zm00001d019988	Zm00001d005535	19	0	0	0	-1	M1
1333	Zm00001d020004	Zm00001d005542	1	0	18	0	-0.0526316	M1
1334	Zm00001d020019	Zm00001d005547	0	19	0	0	-1	M2
1335	Zm00001d020023	Zm00001d005554	6	3	9	1	0.185185	M1
1336	Zm00001d020025	Zm00001d005578	0	0	0	19	NotExpressed	equal
1337	Zm00001d020038	Zm00001d005563	0	0	0	19	NotExpressed	equal
1338	Zm00001d020040	Zm00001d005579	0	18	1	0	-0.947368	M2
1339	Zm00001d020046	Zm00001d005584	0	0	0	19	NotExpressed	equal
1340	Zm00001d020051	Zm00001d005586	13	0	6	0	-0.684211	M1
1341	Zm00001d020071	Zm00001d005594	2	9	0	8	0.363636	M2
1342	Zm00001d020093	Zm00001d005598	15	0	4	0	-0.789474	M1
1343	Zm00001d020100	Zm00001d005609	0	0	0	19	NotExpressed	equal
1344	Zm00001d020136	Zm00001d005622	0	0	0	19	NotExpressed	equal
1345	Zm00001d020137	Zm00001d005622	0	0	0	19	NotExpressed	equal
1346	Zm00001d020147	Zm00001d005624	3	5	11	0	0.144044	M2
1347	Zm00001d020170	Zm00001d005629	19	0	0	0	-1	M1
1348	Zm00001d020170	Zm00001d005629	19	0	0	0	-1	M1
1349	Zm00001d020170	Zm00001d005629	19	0	0	0	-1	M1
1350	Zm00001d020175	Zm00001d005636	1	2	16	0	0.0110803	M2
1351	Zm00001d020175	Zm00001d005636	1	2	16	0	0.0110803	M2
1352	Zm00001d020178	Zm00001d005638	2	1	16	0	0.0110803	M1
1353	Zm00001d020195	Zm00001d005641	0	19	0	0	-1	M2
1354	Zm00001d020201	Zm00001d005642	0	0	19	0	0	equal
1355	Zm00001d020205	Zm00001d005645	0	6	13	0	-0.315789	M2
1356	Zm00001d020213	Zm00001d005647	5	0	14	0	-0.263158	M1
1357	Zm00001d020219	Zm00001d005649	0	0	0	19	NotExpressed	equal
1358	Zm00001d020228	Zm00001d005650	19	0	0	0	-1	M1
1359	Zm00001d020233	Zm00001d005653	0	3	16	0	-0.157895	M2
1360	Zm00001d020250	Zm00001d005654	1	17	1	0	0.0110803	M2
1361	Zm00001d020250	Zm00001d005654	1	17	1	0	0.0110803	M2
1362	Zm00001d020251	Zm00001d005654	0	15	4	0	-0.789474	M2
1363	Zm00001d020251	Zm00001d005654	0	15	4	0	-0.789474	M2
1364	Zm00001d020257	Zm00001d005656	17	0	0	2	-1	M1
1365	Zm00001d020264	Zm00001d005657	16	0	2	1	-0.888889	M1
1366	Zm00001d020272	Zm00001d005658	0	0	0	19	NotExpressed	equal
1367	Zm00001d020273	Zm00001d005661	1	9	3	6	0.0236686	M2
1368	Zm00001d020274	Zm00001d005662	0	19	0	0	-1	M2
1369	Zm00001d020275	Zm00001d005664	1	5	13	0	0.0110803	M2
1370	Zm00001d020296	Zm00001d005671	4	1	14	0	0.0110803	M1
1371	Zm00001d020309	Zm00001d005674	6	4	9	0	0.243767	M1
1372	Zm00001d020315	Zm00001d005684	16	0	3	0	-0.842105	M1
1373	Zm00001d020323	Zm00001d005685	12	4	1	2	0.553633	M1
1374	Zm00001d020337	Zm00001d005690	17	0	0	2	-1	M1
1375	Zm00001d020354	Zm00001d005695	0	15	4	0	-0.789474	M2
1376	Zm00001d020355	Zm00001d005696	1	12	6	0	0.0110803	M2
1377	Zm00001d020358	Zm00001d005699	2	0	17	0	-0.105263	M1
1378	Zm00001d020361	Zm00001d005705	0	19	0	0	-1	M2
1379	Zm00001d020363	Zm00001d005707	3	0	16	0	-0.157895	M1
1380	Zm00001d020381	Zm00001d005713	2	0	17	0	-0.105263	M1
1381	Zm00001d020395	Zm00001d005715	4	4	0	11	1	equal
1382	Zm00001d020409	Zm00001d005726	0	0	0	19	NotExpressed	equal
1383	Zm00001d020411	Zm00001d005727	3	0	16	0	-0.157895	M1
1384	Zm00001d020418	Zm00001d005729	9	0	0	10	-1	M1
1385	Zm00001d020419	Zm00001d005732	0	4	15	0	-0.210526	M2
1386	Zm00001d020425	Zm00001d005733	0	13	6	0	-0.684211	M2
1387	Zm00001d020429	Zm00001d005735	18	0	1	0	-0.947368	M1
1388	Zm00001d020454	Zm00001d005764	6	7	6	0	0.454294	M2
1389	Zm00001d020457	Zm00001d005760	0	0	0	19	NotExpressed	equal
1390	Zm00001d020470	Zm00001d005752	19	0	0	0	-1	M1
1391	Zm00001d020476	Zm00001d005754	0	5	14	0	-0.263158	M2
1392	Zm00001d020485	Zm00001d005751	5	1	13	0	0.0110803	M1
1393	Zm00001d020490	Zm00001d005750	0	2	0	17	-1	M2
1394	Zm00001d020492	Zm00001d005749	0	0	0	19	NotExpressed	equal
1395	Zm00001d020496	Zm00001d005748	19	0	0	0	-1	M1
1396	Zm00001d020505	Zm00001d005767	12	1	1	5	0.0204082	M1
1397	Zm00001d020512	Zm00001d005769	8	0	11	0	-0.421053	M1
1398	Zm00001d020519	Zm00001d005772	0	1	18	0	-0.0526316	M2
1399	Zm00001d020531	Zm00001d005775	0	6	0	13	-1	M2
1400	Zm00001d020533	Zm00001d005776	4	10	2	3	0.53125	M2
1401	Zm00001d020568	Zm00001d005783	0	18	1	0	-0.947368	M2
1402	Zm00001d020569	Zm00001d005784	0	0	0	19	NotExpressed	equal
1403	Zm00001d020580	Zm00001d005789	0	0	0	19	NotExpressed	equal
1404	Zm00001d020583	Zm00001d005790	10	0	9	0	-0.526316	M1
1405	Zm00001d020583	Zm00001d005790	10	0	9	0	-0.526316	M1
1406	Zm00001d020584	Zm00001d005791	0	0	0	19	NotExpressed	equal
1407	Zm00001d020593	Zm00001d005794	0	0	0	19	NotExpressed	equal
1408	Zm00001d020595	Zm00001d005798	0	0	0	19	NotExpressed	equal
1409	Zm00001d020605	Zm00001d005802	3	13	1	2	0.401384	M2
1410	Zm00001d020606	Zm00001d005803	14	0	0	5	-1	M1
1411	Zm00001d020612	Zm00001d005808	0	2	17	0	-0.105263	M2
1412	Zm00001d020614	Zm00001d005813	0	0	0	19	NotExpressed	equal
1413	Zm00001d020617	Zm00001d005816	8	2	7	2	0.138408	M1
1414	Zm00001d020618	Zm00001d005817	2	0	17	0	-0.105263	M1
1415	Zm00001d020623	Zm00001d005819	5	5	9	0	0.277008	equal
1416	Zm00001d020628	Zm00001d005823	1	16	1	1	0.0123457	M2
1417	Zm00001d020628	Zm00001d005823	1	16	1	1	0.0123457	M2
1418	Zm00001d020628	Zm00001d005823	1	16	1	1	0.0123457	M2
1419	Zm00001d020629	Zm00001d005824	0	3	16	0	-0.157895	M2
1420	Zm00001d020636	Zm00001d005828	0	18	0	1	-1	M2
1421	Zm00001d020639	Zm00001d005826	16	0	3	0	-0.842105	M1
1422	Zm00001d020646	Zm00001d005830	9	0	0	10	-1	M1
1423	Zm00001d020647	Zm00001d005831	0	7	12	0	-0.368421	M2
1424	Zm00001d020650	Zm00001d005833	0	14	5	0	-0.736842	M2
1425	Zm00001d020670	Zm00001d005875	0	0	0	19	NotExpressed	equal
1426	Zm00001d020675	Zm00001d005874	15	2	2	0	0.188366	M1
1427	Zm00001d020683	Zm00001d005871	7	4	7	1	0.308642	M1
1428	Zm00001d020687	Zm00001d005866	0	19	0	0	-1	M2
1429	Zm00001d020688	Zm00001d005865	0	0	0	19	NotExpressed	equal
1430	Zm00001d020695	Zm00001d005856	0	18	1	0	-0.947368	M2
1431	Zm00001d020697	Zm00001d005849	0	13	6	0	-0.684211	M2
1432	Zm00001d020704	Zm00001d005843	17	0	0	2	-1	M1
1433	Zm00001d020708	Zm00001d005881	14	0	5	0	-0.736842	M1
1434	Zm00001d020711	Zm00001d005884	19	0	0	0	-1	M1
1435	Zm00001d020713	Zm00001d005885	2	11	6	0	0.144044	M2
1436	Zm00001d020714	Zm00001d005888	0	0	0	19	NotExpressed	equal
1437	Zm00001d020717	Zm00001d005889	0	0	0	19	NotExpressed	equal
1438	Zm00001d020723	Zm00001d005897	0	19	0	0	-1	M2
1439	Zm00001d020731	Zm00001d005901	2	11	5	1	0.160494	M2
1440	Zm00001d020732	Zm00001d005905	1	14	3	1	0.0123457	M2
1441	Zm00001d020736	Zm00001d005905	16	0	3	0	-0.842105	M1
1442	Zm00001d020741	Zm00001d005905	0	18	0	1	-1	M2
1443	Zm00001d020748	Zm00001d005912	6	6	7	0	0.398892	equal
1444	Zm00001d020755	Zm00001d005917	1	17	0	1	0.0123457	M2
1445	Zm00001d020763	Zm00001d005919	0	0	0	19	NotExpressed	equal
1446	Zm00001d020764	Zm00001d005920	0	0	0	19	NotExpressed	equal
1447	Zm00001d020770	Zm00001d005924	0	0	19	0	0	equal
1448	Zm00001d020771	Zm00001d005925	0	0	19	0	0	equal
1449	Zm00001d020772	Zm00001d005928	0	19	0	0	-1	M2
1450	Zm00001d020789	Zm00001d005936	0	19	0	0	-1	M2
1451	Zm00001d020790	Zm00001d005939	0	0	0	19	NotExpressed	equal
1452	Zm00001d020791	Zm00001d005940	2	12	5	0	0.155125	M2
1453	Zm00001d020799	Zm00001d005949	0	2	0	17	-1	M2
1454	Zm00001d020804	Zm00001d005951	0	0	0	19	NotExpressed	equal
1455	Zm00001d020807	Zm00001d005957	19	0	0	0	-1	M1
1456	Zm00001d020823	Zm00001d005962	0	0	0	19	NotExpressed	equal
1457	Zm00001d020826	Zm00001d005964	0	0	0	19	NotExpressed	equal
1458	Zm00001d020828	Zm00001d005966	2	8	8	1	0.123457	M2
1459	Zm00001d020837	Zm00001d005970	0	0	0	19	NotExpressed	equal
1460	Zm00001d020840	Zm00001d005971	14	0	5	0	-0.736842	M1
1461	Zm00001d020858	Zm00001d005976	1	2	16	0	0.0110803	M2
1462	Zm00001d020861	Zm00001d005978	0	0	0	19	NotExpressed	equal
1463	Zm00001d020862	Zm00001d005986	1	7	0	11	0.0625	M2
1464	Zm00001d020871	Zm00001d005984	10	2	6	1	0.148148	M1
1465	Zm00001d020872	Zm00001d005989	18	0	1	0	-0.947368	M1
1466	Zm00001d020874	Zm00001d005993	0	0	0	19	NotExpressed	equal
1467	Zm00001d020877	Zm00001d005996	10	2	1	6	0.284024	M1
1468	Zm00001d020879	Zm00001d005997	0	10	9	0	-0.526316	M2
1469	Zm00001d020881	Zm00001d006001	0	0	0	19	NotExpressed	equal
1470	Zm00001d020898	Zm00001d006008	0	14	5	0	-0.736842	M2
1471	Zm00001d020898	Zm00001d006008	0	14	5	0	-0.736842	M2
1472	Zm00001d020903	Zm00001d006009	13	0	0	6	-1	M1
1473	Zm00001d020926	Zm00001d006016	0	0	19	0	0	equal
1474	Zm00001d020932	Zm00001d006022	0	0	0	19	NotExpressed	equal
1475	Zm00001d020937	Zm00001d006025	1	10	5	3	0.015625	M2
1476	Zm00001d020941	Zm00001d006028	0	0	0	19	NotExpressed	equal
1477	Zm00001d020946	Zm00001d006030	16	0	3	0	-0.842105	M1
1478	Zm00001d020948	Zm00001d006031	4	2	12	1	0.0740741	M1
1479	Zm00001d020951	Zm00001d006034	2	14	2	1	0.197531	M2
1480	Zm00001d020961	Zm00001d006037	4	1	0	14	0.16	M1
1481	Zm00001d020963	Zm00001d006040	16	0	3	0	-0.842105	M1
1482	Zm00001d020965	Zm00001d006041	18	0	1	0	-0.947368	M1
1483	Zm00001d020975	Zm00001d006046	0	0	0	19	NotExpressed	equal
1484	Zm00001d020986	Zm00001d006057	3	2	14	0	0.0554017	M1
1485	Zm00001d021006	Zm00001d006059	19	0	0	0	-1	M1
1486	Zm00001d021010	Zm00001d006060	8	1	2	8	0.0330579	M1
1487	Zm00001d021018	Zm00001d006064	18	0	1	0	-0.947368	M1
1488	Zm00001d021019	Zm00001d006065	0	0	0	19	NotExpressed	equal
1489	Zm00001d021020	Zm00001d006064	0	0	19	0	0	equal
1490	Zm00001d021023	Zm00001d006066	18	0	1	0	-0.947368	M1
1491	Zm00001d021025	Zm00001d006069	10	1	1	7	0.0277778	M1
1492	Zm00001d021025	Zm00001d006069	10	1	1	7	0.0277778	M1
1493	Zm00001d021032	Zm00001d006070	0	0	19	0	0	equal
1494	Zm00001d021035	Zm00001d006071	0	19	0	0	-1	M2
1495	Zm00001d021038	Zm00001d006078	9	1	6	3	0.015625	M1
1496	Zm00001d021046	Zm00001d006080	19	0	0	0	-1	M1
1497	Zm00001d021046	Zm00001d006080	19	0	0	0	-1	M1
1498	Zm00001d021051	Zm00001d006085	0	0	19	0	0	equal
1499	Zm00001d021054	Zm00001d006090	0	18	1	0	-0.947368	M2
1500	Zm00001d021056	Zm00001d006091	18	0	0	1	-1	M1
1501	Zm00001d021057	Zm00001d006094	0	0	0	19	NotExpressed	equal
1502	Zm00001d021058	Zm00001d006096	0	19	0	0	-1	M2
1503	Zm00001d021060	Zm00001d006099	13	1	5	0	0.0110803	M1
1504	Zm00001d021061	Zm00001d006100	19	0	0	0	-1	M1
1505	Zm00001d021061	Zm00001d006100	19	0	0	0	-1	M1
1506	Zm00001d021065	Zm00001d006102	0	12	7	0	-0.631579	M2
1507	Zm00001d021069	Zm00001d006106	0	0	0	19	NotExpressed	equal
1508	Zm00001d021070	Zm00001d006107	0	0	0	19	NotExpressed	equal
1509	Zm00001d021071	Zm00001d006108	1	1	17	0	0.0110803	equal
1510	Zm00001d021123	Zm00001d006112	19	0	0	0	-1	M1
1511	Zm00001d021127	Zm00001d006113	2	1	16	0	0.0110803	M1
1512	Zm00001d021141	Zm00001d006119	0	0	19	0	0	equal
1513	Zm00001d021147	Zm00001d006125	8	0	11	0	-0.421053	M1
1514	Zm00001d021173	Zm00001d006132	1	4	14	0	0.0110803	M2
1515	Zm00001d021180	Zm00001d006131	1	1	17	0	0.0110803	equal
1516	Zm00001d021181	Zm00001d006130	6	3	10	0	0.166205	M1
1517	Zm00001d021189	Zm00001d006127	0	0	0	19	NotExpressed	equal
1518	Zm00001d021192	Zm00001d006158	9	0	10	0	-0.473684	M1
1519	Zm00001d021196	Zm00001d006160	0	4	15	0	-0.210526	M2
1520	Zm00001d021197	Zm00001d006161	18	0	0	1	-1	M1
1521	Zm00001d021199	Zm00001d006162	3	4	12	0	0.121884	M2
1522	Zm00001d021201	Zm00001d006166	2	0	17	0	-0.105263	M1
1523	Zm00001d021203	Zm00001d006167	1	10	8	0	0.0110803	M2
1524	Zm00001d021204	Zm00001d006168	1	8	10	0	0.0110803	M2
1525	Zm00001d021205	Zm00001d006169	0	0	0	19	NotExpressed	equal
1526	Zm00001d021207	Zm00001d006169	0	0	0	19	NotExpressed	equal
1527	Zm00001d021207	Zm00001d006170	0	0	0	19	NotExpressed	equal
1528	Zm00001d021207	Zm00001d006170	0	0	0	19	NotExpressed	equal
1529	Zm00001d021208	Zm00001d006170	0	0	0	19	NotExpressed	equal
1530	Zm00001d021227	Zm00001d006176	18	0	1	0	-0.947368	M1
1531	Zm00001d021231	Zm00001d006179	15	1	3	0	0.0110803	M1
1532	Zm00001d021240	Zm00001d006192	1	0	18	0	-0.0526316	M1
1533	Zm00001d021241	Zm00001d006184	7	5	7	0	0.365651	M1
1534	Zm00001d021248	Zm00001d006180	9	5	2	3	0.640625	M1
1535	Zm00001d021267	Zm00001d006194	1	0	18	0	-0.0526316	M1
1536	Zm00001d021268	Zm00001d006195	0	0	0	19	NotExpressed	equal
1537	Zm00001d021269	Zm00001d006196	15	0	4	0	-0.789474	M1
1538	Zm00001d021278	Zm00001d006198	0	19	0	0	-1	M2
1539	Zm00001d021282	Zm00001d006204	3	0	16	0	-0.157895	M1
1540	Zm00001d021283	Zm00001d006205	16	0	3	0	-0.842105	M1
1541	Zm00001d021285	Zm00001d006209	0	0	0	19	NotExpressed	equal
1542	Zm00001d021287	Zm00001d006210	17	0	2	0	-0.894737	M1
1543	Zm00001d021288	Zm00001d006211	0	17	2	0	-0.894737	M2
1544	Zm00001d021291	Zm00001d006212	1	3	15	0	0.0110803	M2
1545	Zm00001d021300	Zm00001d006213	0	18	1	0	-0.947368	M2
1546	Zm00001d021301	Zm00001d006214	0	19	0	0	-1	M2
1547	Zm00001d021303	Zm00001d006217	17	0	2	0	-0.894737	M1
1548	Zm00001d021306	Zm00001d006219	12	0	7	0	-0.631579	M1
1549	Zm00001d021309	Zm00001d006220	0	5	14	0	-0.263158	M2
1550	Zm00001d021310	Zm00001d006221	18	0	0	1	-1	M1
1551	Zm00001d021314	Zm00001d006226	19	0	0	0	-1	M1
1552	Zm00001d021318	Zm00001d006231	15	1	3	0	0.0110803	M1
1553	Zm00001d021341	Zm00001d006358	0	19	0	0	-1	M2
1554	Zm00001d021342	Zm00001d006355	17	0	2	0	-0.894737	M1
1555	Zm00001d021345	Zm00001d006351	6	0	0	13	-1	M1
1556	Zm00001d021347	Zm00001d006350	1	2	16	0	0.0110803	M2
1557	Zm00001d021362	Zm00001d006348	0	0	0	19	NotExpressed	equal
1558	Zm00001d021363	Zm00001d006347	0	12	7	0	-0.631579	M2
1559	Zm00001d021375	Zm00001d006336	17	0	2	0	-0.894737	M1
1560	Zm00001d021389	Zm00001d006331	2	1	16	0	0.0110803	M1
1561	Zm00001d021392	Zm00001d006328	7	0	12	0	-0.368421	M1
1562	Zm00001d021395	Zm00001d006324	19	0	0	0	-1	M1
1563	Zm00001d021401	Zm00001d006320	3	0	16	0	-0.157895	M1
1564	Zm00001d021404	Zm00001d006317	1	3	15	0	0.0110803	M2
1565	Zm00001d021418	Zm00001d006312	19	0	0	0	-1	M1
1566	Zm00001d021419	Zm00001d006311	0	18	0	1	-1	M2
1567	Zm00001d021420	Zm00001d006310	12	0	7	0	-0.631579	M1
1568	Zm00001d021421	Zm00001d006309	19	0	0	0	-1	M1
1569	Zm00001d021426	Zm00001d006307	8	0	11	0	-0.421053	M1
1570	Zm00001d021433	Zm00001d006306	0	0	0	19	NotExpressed	equal
1571	Zm00001d021438	Zm00001d006295	0	7	12	0	-0.368421	M2
1572	Zm00001d021441	Zm00001d006294	0	18	1	0	-0.947368	M2
1573	Zm00001d021442	Zm00001d006293	0	0	0	19	NotExpressed	equal
1574	Zm00001d021445	Zm00001d006287	2	0	17	0	-0.105263	M1
1575	Zm00001d021452	Zm00001d006286	15	1	3	0	0.0110803	M1
1576	Zm00001d021456	Zm00001d006274	2	17	0	0	0.210526	M2
1577	Zm00001d021456	Zm00001d006274	2	17	0	0	0.210526	M2
1578	Zm00001d021456	Zm00001d006274	2	17	0	0	0.210526	M2
1579	Zm00001d021456	Zm00001d006274	2	17	0	0	0.210526	M2
1580	Zm00001d021457	Zm00001d006282	17	1	1	0	0.0110803	M1
1581	Zm00001d021462	Zm00001d006270	0	19	0	0	-1	M2
1582	Zm00001d021462	Zm00001d006270	0	19	0	0	-1	M2
1583	Zm00001d021464	Zm00001d006269	5	0	14	0	-0.263158	M1
1584	Zm00001d021473	Zm00001d006267	2	2	15	0	0.0443213	equal
1585	Zm00001d021494	Zm00001d006371	10	5	4	0	0.498615	M1
1586	Zm00001d021497	Zm00001d006372	0	0	0	19	NotExpressed	equal
1587	Zm00001d021498	Zm00001d006373	0	2	17	0	-0.105263	M2
1588	Zm00001d021507	Zm00001d006377	0	2	17	0	-0.105263	M2
1589	Zm00001d021508	Zm00001d006388	0	19	0	0	-1	M2
1590	Zm00001d021512	Zm00001d006389	6	0	13	0	-0.315789	M1
1591	Zm00001d021517	Zm00001d006402	2	3	14	0	0.0554017	M2
1592	Zm00001d021519	Zm00001d006408	0	1	18	0	-0.0526316	M2
1593	Zm00001d021520	Zm00001d006409	15	0	4	0	-0.789474	M1
1594	Zm00001d021522	Zm00001d006410	0	0	19	0	0	equal
1595	Zm00001d021524	Zm00001d006415	10	1	8	0	0.0110803	M1
1596	Zm00001d021532	Zm00001d006417	8	3	7	1	0.234568	M1
1597	Zm00001d021534	Zm00001d006419	16	0	3	0	-0.842105	M1
1598	Zm00001d021536	Zm00001d006421	2	0	17	0	-0.105263	M1
1599	Zm00001d021541	Zm00001d006428	0	0	0	19	NotExpressed	equal
1600	Zm00001d021551	Zm00001d006433	0	0	19	0	0	equal
1601	Zm00001d021553	Zm00001d006438	0	13	6	0	-0.684211	M2
1602	Zm00001d021554	Zm00001d006439	19	0	0	0	-1	M1
1603	Zm00001d021557	Zm00001d006440	0	0	19	0	0	equal
1604	Zm00001d021571	Zm00001d006449	0	17	1	1	-0.944444	M2
1605	Zm00001d021571	Zm00001d006449	0	17	1	1	-0.944444	M2
1606	Zm00001d021571	Zm00001d006449	0	17	1	1	-0.944444	M2
1607	Zm00001d021573	Zm00001d006451	0	0	0	19	NotExpressed	equal
1608	Zm00001d021573	Zm00001d006451	0	0	0	19	NotExpressed	equal
1609	Zm00001d021574	Zm00001d006453	19	0	0	0	-1	M1
1610	Zm00001d021576	Zm00001d006450	15	1	2	1	0.0123457	M1
1611	Zm00001d021577	Zm00001d006450	3	7	5	4	0.302222	M2
1612	Zm00001d021579	Zm00001d006454	17	0	2	0	-0.894737	M1
1613	Zm00001d021580	Zm00001d006455	0	17	2	0	-0.894737	M2
1614	Zm00001d021583	Zm00001d006456	6	1	12	0	0.0110803	M1
1615	Zm00001d021587	Zm00001d006460	19	0	0	0	-1	M1
1616	Zm00001d021591	Zm00001d006463	0	0	0	19	NotExpressed	equal
1617	Zm00001d021595	Zm00001d006466	13	0	6	0	-0.684211	M1
1618	Zm00001d021596	Zm00001d006467	0	0	0	19	NotExpressed	equal
1619	Zm00001d021609	Zm00001d006472	2	1	16	0	0.0110803	M1
1620	Zm00001d021610	Zm00001d006473	0	16	3	0	-0.842105	M2
1621	Zm00001d021623	Zm00001d006479	19	0	0	0	-1	M1
1622	Zm00001d021627	Zm00001d006489	0	19	0	0	-1	M2
1623	Zm00001d021629	Zm00001d006494	7	1	11	0	0.0110803	M1
1624	Zm00001d021632	Zm00001d006495	6	7	2	4	0.728889	M2
1625	Zm00001d021633	Zm00001d006496	0	15	4	0	-0.789474	M2
1626	Zm00001d021635	Zm00001d006499	10	0	9	0	-0.526316	M1
1627	Zm00001d021639	Zm00001d006503	0	9	0	10	-1	M2
1628	Zm00001d021641	Zm00001d006504	0	6	13	0	-0.315789	M2
1629	Zm00001d021646	Zm00001d006507	1	4	14	0	0.0110803	M2
1630	Zm00001d021649	Zm00001d006509	1	13	5	0	0.0110803	M2
1631	Zm00001d021652	Zm00001d006510	0	19	0	0	-1	M2
1632	Zm00001d021653	Zm00001d006511	0	18	1	0	-0.947368	M2
1633	Zm00001d021659	Zm00001d006517	10	2	7	0	0.132964	M1
1634	Zm00001d021672	Zm00001d006520	18	0	0	1	-1	M1
1635	Zm00001d021672	Zm00001d006520	18	0	0	1	-1	M1
1636	Zm00001d021672	Zm00001d006520	18	0	0	1	-1	M1
1637	Zm00001d021673	Zm00001d006521	11	6	2	0	0.6759	M1
1638	Zm00001d021674	Zm00001d006524	15	0	1	3	-0.9375	M1
1639	Zm00001d021677	Zm00001d006525	19	0	0	0	-1	M1
1640	Zm00001d021677	Zm00001d006526	19	0	0	0	-1	M1
1641	Zm00001d021679	Zm00001d006527	0	13	6	0	-0.684211	M2
1642	Zm00001d021689	Zm00001d006535	18	0	0	1	-1	M1
1643	Zm00001d021689	Zm00001d006535	18	0	0	1	-1	M1
1644	Zm00001d021689	Zm00001d006535	18	0	0	1	-1	M1
1645	Zm00001d021690	Zm00001d006538	18	0	1	0	-0.947368	M1
1646	Zm00001d021690	Zm00001d006538	18	0	1	0	-0.947368	M1
1647	Zm00001d021690	Zm00001d006538	18	0	1	0	-0.947368	M1
1648	Zm00001d021697	Zm00001d006538	1	10	4	4	0.0177778	M2
1649	Zm00001d021703	Zm00001d006540	0	16	0	3	-1	M2
1650	Zm00001d021704	Zm00001d006541	16	0	3	0	-0.842105	M1
1651	Zm00001d021706	Zm00001d006547	19	0	0	0	-1	M1
1652	Zm00001d021707	Zm00001d006548	0	0	19	0	0	equal
1653	Zm00001d021714	Zm00001d006553	4	6	9	0	0.243767	M2
1654	Zm00001d021718	Zm00001d006561	19	0	0	0	-1	M1
1655	Zm00001d021721	Zm00001d006565	19	0	0	0	-1	M1
1656	Zm00001d021732	Zm00001d006571	7	2	1	9	0.36	M1
1657	Zm00001d021736	Zm00001d006571	4	3	0	12	0.897959	M1
1658	Zm00001d021736	Zm00001d006571	4	3	0	12	0.897959	M1
1659	Zm00001d021736	Zm00001d006571	4	3	0	12	0.897959	M1
1660	Zm00001d021741	Zm00001d006573	0	0	19	0	0	equal
1661	Zm00001d021746	Zm00001d006574	10	4	4	1	0.419753	M1
1662	Zm00001d021754	Zm00001d006580	0	1	18	0	-0.0526316	M2
1663	Zm00001d021761	Zm00001d006585	0	0	0	19	NotExpressed	equal
1664	Zm00001d021763	Zm00001d006587	0	8	0	11	-1	M2
1665	Zm00001d021764	Zm00001d006588	1	0	18	0	-0.0526316	M1
1666	Zm00001d021777	Zm00001d006590	11	4	3	1	0.45679	M1
1667	Zm00001d021779	Zm00001d006591	0	19	0	0	-1	M2
1668	Zm00001d021784	Zm00001d006592	19	0	0	0	-1	M1
1669	Zm00001d021785	Zm00001d006593	6	1	12	0	0.0110803	M1
1670	Zm00001d021787	Zm00001d006595	13	1	5	0	0.0110803	M1
1671	Zm00001d021787	Zm00001d006595	13	1	5	0	0.0110803	M1
1672	Zm00001d021787	Zm00001d006595	13	1	5	0	0.0110803	M1
1673	Zm00001d021788	Zm00001d006596	19	0	0	0	-1	M1
1674	Zm00001d021790	Zm00001d006597	0	19	0	0	-1	M2
1675	Zm00001d021791	Zm00001d006601	1	0	18	0	-0.0526316	M1
1676	Zm00001d021802	Zm00001d006602	19	0	0	0	-1	M1
1677	Zm00001d021803	Zm00001d006603	12	1	5	1	0.0123457	M1
1678	Zm00001d021805	Zm00001d006605	1	0	18	0	-0.0526316	M1
1679	Zm00001d021806	Zm00001d006607	1	0	18	0	-0.0526316	M1
1680	Zm00001d021810	Zm00001d006606	19	0	0	0	-1	M1
1681	Zm00001d021812	Zm00001d006608	0	16	3	0	-0.842105	M2
1682	Zm00001d021815	Zm00001d006613	0	19	0	0	-1	M2
1683	Zm00001d021817	Zm00001d006614	9	0	10	0	-0.473684	M1
1684	Zm00001d021831	Zm00001d006619	0	0	0	19	NotExpressed	equal
1685	Zm00001d021834	Zm00001d006620	2	0	17	0	-0.105263	M1
1686	Zm00001d021835	Zm00001d006621	15	0	4	0	-0.789474	M1
1687	Zm00001d021836	Zm00001d006623	3	9	7	0	0.232687	M2
1688	Zm00001d021838	Zm00001d006625	5	2	12	0	0.0775623	M1
1689	Zm00001d021839	Zm00001d006626	15	1	3	0	0.0110803	M1
1690	Zm00001d021858	Zm00001d006628	0	19	0	0	-1	M2
1691	Zm00001d021870	Zm00001d006639	8	4	4	3	0.4375	M1
1692	Zm00001d021875	Zm00001d006644	19	0	0	0	-1	M1
1693	Zm00001d021877	Zm00001d006645	0	19	0	0	-1	M2
1694	Zm00001d021882	Zm00001d006650	19	0	0	0	-1	M1
1695	Zm00001d021891	Zm00001d006651	0	0	0	19	NotExpressed	equal
1696	Zm00001d021892	Zm00001d006653	0	0	0	19	NotExpressed	equal
1697	Zm00001d021903	Zm00001d006658	2	3	14	0	0.0554017	M2
1698	Zm00001d021906	Zm00001d006663	10	0	0	9	-1	M1
1699	Zm00001d021908	Zm00001d006667	0	0	19	0	0	equal
1700	Zm00001d021913	Zm00001d006670	0	6	13	0	-0.315789	M2
1701	Zm00001d021915	Zm00001d006673	4	5	8	2	0.262976	M2
1702	Zm00001d021927	Zm00001d006677	0	0	0	19	NotExpressed	equal
1703	Zm00001d021929	Zm00001d006678	0	0	0	19	NotExpressed	equal
1704	Zm00001d021930	Zm00001d006679	19	0	0	0	-1	M1
1705	Zm00001d021931	Zm00001d006680	0	19	0	0	-1	M2
1706	Zm00001d021932	Zm00001d006682	1	3	15	0	0.0110803	M2
1707	Zm00001d021934	Zm00001d006687	0	0	0	19	NotExpressed	equal
1708	Zm00001d021935	Zm00001d006688	0	11	2	6	-0.846154	M2
1709	Zm00001d021936	Zm00001d006688	16	0	2	1	-0.888889	M1
1710	Zm00001d021938	Zm00001d006688	19	0	0	0	-1	M1
1711	Zm00001d021942	Zm00001d006688	2	6	6	5	0.163265	M2
1712	Zm00001d021946	Zm00001d006701	0	0	0	19	NotExpressed	equal
1713	Zm00001d021947	Zm00001d006702	0	0	0	19	NotExpressed	equal
1714	Zm00001d021950	Zm00001d006704	9	0	10	0	-0.473684	M1
1715	Zm00001d021951	Zm00001d006705	16	0	3	0	-0.842105	M1
1716	Zm00001d021952	Zm00001d006708	15	0	4	0	-0.789474	M1
1717	Zm00001d021954	Zm00001d006710	8	0	11	0	-0.421053	M1
1718	Zm00001d021955	Zm00001d006711	19	0	0	0	-1	M1
1719	Zm00001d021958	Zm00001d006714	13	0	6	0	-0.684211	M1
1720	Zm00001d021959	Zm00001d006715	11	0	7	1	-0.611111	M1
1721	Zm00001d021966	Zm00001d006717	5	0	14	0	-0.263158	M1
1722	Zm00001d021971	Zm00001d006720	19	0	0	0	-1	M1
1723	Zm00001d021973	Zm00001d006721	0	0	0	19	NotExpressed	equal
1724	Zm00001d021974	Zm00001d006722	17	0	2	0	-0.894737	M1
1725	Zm00001d021978	Zm00001d006726	19	0	0	0	-1	M1
1726	Zm00001d021979	Zm00001d006731	3	3	13	0	0.099723	equal
1727	Zm00001d021993	Zm00001d006737	0	0	19	0	0	equal
1728	Zm00001d021995	Zm00001d006739	19	0	0	0	-1	M1
1729	Zm00001d021998	Zm00001d006744	0	0	0	19	NotExpressed	equal
1730	Zm00001d022001	Zm00001d006746	12	2	5	0	0.155125	M1
1731	Zm00001d022006	Zm00001d006749	8	1	10	0	0.0110803	M1
1732	Zm00001d022010	Zm00001d006751	0	3	16	0	-0.157895	M2
1733	Zm00001d022016	Zm00001d006752	19	0	0	0	-1	M1
1734	Zm00001d022017	Zm00001d006753	0	2	17	0	-0.105263	M2
1735	Zm00001d022025	Zm00001d006756	0	17	2	0	-0.894737	M2
1736	Zm00001d022038	Zm00001d006757	5	0	14	0	-0.263158	M1
1737	Zm00001d022040	Zm00001d006758	1	15	1	2	0.0138408	M2
1738	Zm00001d022041	Zm00001d006759	13	0	6	0	-0.684211	M1
1739	Zm00001d022042	Zm00001d006760	0	0	0	19	NotExpressed	equal
1740	Zm00001d022049	Zm00001d006769	0	1	18	0	-0.0526316	M2
1741	Zm00001d022050	Zm00001d006771	0	5	14	0	-0.263158	M2
1742	Zm00001d022072	Zm00001d006828	0	19	0	0	-1	M2
1743	Zm00001d022073	Zm00001d006825	1	14	4	0	0.0110803	M2
1744	Zm00001d022083	Zm00001d006821	19	0	0	0	-1	M1
1745	Zm00001d022085	Zm00001d006820	19	0	0	0	-1	M1
1746	Zm00001d022099	Zm00001d006813	0	0	0	19	NotExpressed	equal
1747	Zm00001d022102	Zm00001d006810	19	0	0	0	-1	M1
1748	Zm00001d022107	Zm00001d006833	6	2	0	11	0.5	M1
1749	Zm00001d022108	Zm00001d006834	1	1	17	0	0.0110803	equal
1750	Zm00001d022109	Zm00001d006835	0	0	0	19	NotExpressed	equal
1751	Zm00001d022111	Zm00001d006838	19	0	0	0	-1	M1
1752	Zm00001d022120	Zm00001d006841	5	0	0	14	-1	M1
1753	Zm00001d022125	Zm00001d006845	10	1	8	0	0.0110803	M1
1754	Zm00001d022132	Zm00001d006855	19	0	0	0	-1	M1
1755	Zm00001d022139	Zm00001d006860	0	0	0	19	NotExpressed	equal
1756	Zm00001d022143	Zm00001d006864	0	19	0	0	-1	M2
1757	Zm00001d022144	Zm00001d006866	1	4	14	0	0.0110803	M2
1758	Zm00001d022151	Zm00001d006874	7	2	10	0	0.099723	M1
1759	Zm00001d022152	Zm00001d006875	0	0	0	19	NotExpressed	equal
1760	Zm00001d022154	Zm00001d006879	19	0	0	0	-1	M1
1761	Zm00001d022163	Zm00001d006883	5	11	3	0	0.542936	M2
1762	Zm00001d022166	Zm00001d006885	8	1	10	0	0.0110803	M1
1763	Zm00001d022180	Zm00001d006899	0	19	0	0	-1	M2
1764	Zm00001d022181	Zm00001d006900	1	14	4	0	0.0110803	M2
1765	Zm00001d022189	Zm00001d006906	11	0	8	0	-0.578947	M1
1766	Zm00001d022190	Zm00001d006910	1	6	12	0	0.0110803	M2
1767	Zm00001d022192	Zm00001d006913	0	0	0	19	NotExpressed	equal
1768	Zm00001d022192	Zm00001d006913	0	0	0	19	NotExpressed	equal
1769	Zm00001d022195	Zm00001d006915	8	3	0	8	0.628099	M1
1770	Zm00001d022199	Zm00001d006916	2	3	14	0	0.0554017	M2
1771	Zm00001d022201	Zm00001d006917	4	3	12	0	0.121884	M1
1772	Zm00001d022202	Zm00001d006918	0	19	0	0	-1	M2
1773	Zm00001d022212	Zm00001d006921	1	4	14	0	0.0110803	M2
1774	Zm00001d022234	Zm00001d007015	19	0	0	0	-1	M1
1775	Zm00001d022237	Zm00001d007012	0	19	0	0	-1	M2
1776	Zm00001d022238	Zm00001d006951	0	8	11	0	-0.421053	M2
1777	Zm00001d022249	Zm00001d006950	0	14	1	4	-0.933333	M2
1778	Zm00001d022262	Zm00001d006947	0	19	0	0	-1	M2
1779	Zm00001d022262	Zm00001d006947	0	19	0	0	-1	M2
1780	Zm00001d022262	Zm00001d006947	0	19	0	0	-1	M2
1781	Zm00001d022262	Zm00001d006948	0	19	0	0	-1	M2
1782	Zm00001d022266	Zm00001d006945	0	0	0	19	NotExpressed	equal
1783	Zm00001d022272	Zm00001d006944	8	2	9	0	0.110803	M1
1784	Zm00001d022273	Zm00001d006941	19	0	0	0	-1	M1
1785	Zm00001d022275	Zm00001d006939	18	0	1	0	-0.947368	M1
1786	Zm00001d022280	Zm00001d006933	0	0	0	19	NotExpressed	equal
1787	Zm00001d022284	Zm00001d006933	0	0	0	19	NotExpressed	equal
1788	Zm00001d022284	Zm00001d006937	0	8	0	11	-1	M2
1789	Zm00001d022290	Zm00001d006937	0	8	0	11	-1	M2
1790	Zm00001d022290	Zm00001d006937	0	8	0	11	-1	M2
1791	Zm00001d022290	Zm00001d006933	0	0	0	19	NotExpressed	equal
1792	Zm00001d022296	Zm00001d006930	0	19	0	0	-1	M2
1793	Zm00001d022305	Zm00001d007029	0	2	17	0	-0.105263	M2
1794	Zm00001d022307	Zm00001d007031	5	0	14	0	-0.263158	M1
1795	Zm00001d022314	Zm00001d007037	0	16	3	0	-0.842105	M2
1796	Zm00001d022316	Zm00001d007038	15	0	4	0	-0.789474	M1
1797	Zm00001d022322	Zm00001d007039	0	10	9	0	-0.526316	M2
1798	Zm00001d022335	Zm00001d007043	0	0	19	0	0	equal
1799	Zm00001d022341	Zm00001d007048	9	0	10	0	-0.473684	M1
1800	Zm00001d022347	Zm00001d007050	4	1	13	1	0.0123457	M1
1801	Zm00001d022350	Zm00001d007058	0	19	0	0	-1	M2
1802	Zm00001d022354	Zm00001d007059	0	11	8	0	-0.578947	M2
1803	Zm00001d022364	Zm00001d007062	12	0	7	0	-0.631579	M1
1804	Zm00001d022366	Zm00001d007068	0	0	0	19	NotExpressed	equal
1805	Zm00001d022368	Zm00001d007071	15	0	0	4	-1	M1
1806	Zm00001d022371	Zm00001d007072	14	1	3	1	0.0123457	M1
1807	Zm00001d022374	Zm00001d007073	11	3	0	5	0.510204	M1
1808	Zm00001d022378	Zm00001d007075	0	4	15	0	-0.210526	M2
1809	Zm00001d022380	Zm00001d007076	14	1	0	4	0.0177778	M1
1810	Zm00001d022384	Zm00001d007080	0	14	5	0	-0.736842	M2
1811	Zm00001d022387	Zm00001d007081	1	4	14	0	0.0110803	M2
1812	Zm00001d022391	Zm00001d007082	3	5	11	0	0.144044	M2
1813	Zm00001d022395	Zm00001d007085	0	14	5	0	-0.736842	M2
1814	Zm00001d022405	Zm00001d007089	4	1	14	0	0.0110803	M1
1815	Zm00001d022407	Zm00001d007095	0	13	6	0	-0.684211	M2
1816	Zm00001d022414	Zm00001d007096	0	3	16	0	-0.157895	M2
1817	Zm00001d022416	Zm00001d007097	19	0	0	0	-1	M1
1818	Zm00001d022425	Zm00001d007186	0	12	7	0	-0.631579	M2
1819	Zm00001d022428	Zm00001d007184	1	3	15	0	0.0110803	M2
1820	Zm00001d022429	Zm00001d007183	10	0	9	0	-0.526316	M1
1821	Zm00001d022430	Zm00001d007181	1	15	3	0	0.0110803	M2
1822	Zm00001d022433	Zm00001d007179	1	9	9	0	0.0110803	M2
1823	Zm00001d022435	Zm00001d007175	0	7	12	0	-0.368421	M2
1824	Zm00001d022438	Zm00001d007174	19	0	0	0	-1	M1
1825	Zm00001d022440	Zm00001d007173	0	0	0	19	NotExpressed	equal
1826	Zm00001d022442	Zm00001d007172	0	19	0	0	-1	M2
1827	Zm00001d022463	Zm00001d007154	19	0	0	0	-1	M1
1828	Zm00001d022465	Zm00001d007146	4	1	14	0	0.0110803	M1
1829	Zm00001d022466	Zm00001d007145	0	4	15	0	-0.210526	M2
1830	Zm00001d022469	Zm00001d007133	18	0	1	0	-0.947368	M1
1831	Zm00001d022469	Zm00001d007135	19	0	0	0	-1	M1
1832	Zm00001d022474	Zm00001d007130	17	0	2	0	-0.894737	M1
1833	Zm00001d022477	Zm00001d007123	0	1	0	18	-1	M2
1834	Zm00001d022481	Zm00001d007121	1	2	16	0	0.0110803	M2
1835	Zm00001d022490	Zm00001d007113	0	0	19	0	0	equal
1836	Zm00001d022499	Zm00001d007111	4	0	15	0	-0.210526	M1
1837	Zm00001d022500	Zm00001d007107	10	3	3	3	0.359375	M1
1838	Zm00001d022516	Zm00001d007187	0	16	0	3	-1	M2
1839	Zm00001d022516	Zm00001d007187	0	16	0	3	-1	M2
1840	Zm00001d022530	Zm00001d007188	0	0	0	19	NotExpressed	equal
1841	Zm00001d022541	Zm00001d007193	0	12	7	0	-0.631579	M2
1842	Zm00001d022546	Zm00001d007196	19	0	0	0	-1	M1
1843	Zm00001d022560	Zm00001d007202	0	19	0	0	-1	M2
1844	Zm00001d022562	Zm00001d007204	0	10	9	0	-0.526316	M2
1845	Zm00001d022563	Zm00001d007205	0	14	2	3	-0.875	M2
1846	Zm00001d022565	Zm00001d007207	1	1	17	0	0.0110803	equal
1847	Zm00001d022573	Zm00001d007215	0	0	19	0	0	equal
1848	Zm00001d022575	Zm00001d007216	19	0	0	0	-1	M1
1849	Zm00001d022585	Zm00001d007227	19	0	0	0	-1	M1
1850	Zm00001d022587	Zm00001d007232	0	9	10	0	-0.473684	M2
1851	Zm00001d022594	Zm00001d006257	0	0	0	19	NotExpressed	equal
1852	Zm00001d022596	Zm00001d006256	0	19	0	0	-1	M2
1853	Zm00001d022604	Zm00001d006249	18	0	1	0	-0.947368	M1
1854	Zm00001d022605	Zm00001d006247	0	17	2	0	-0.894737	M2
1855	Zm00001d022611	Zm00001d006246	2	1	16	0	0.0110803	M1
1856	Zm00001d022621	Zm00001d006243	19	0	0	0	-1	M1
1857	Zm00001d022622	Zm00001d006242	11	0	8	0	-0.578947	M1
1858	Zm00001d022625	Zm00001d006238	0	19	0	0	-1	M2
1859	Zm00001d022627	Zm00001d006237	1	3	15	0	0.0110803	M2
1860	Zm00001d022628	Zm00001d006236	0	0	0	19	NotExpressed	equal
1861	Zm00001d022629	Zm00001d006235	0	0	19	0	0	equal
1862	Zm00001d022647	Zm00001d006232	3	11	3	2	0.346021	M2
1863	Zm00001d023239	Zm00001d044630	0	19	0	0	-1	M2
1864	Zm00001d023252	Zm00001d044635	0	3	16	0	-0.157895	M2
1865	Zm00001d023253	Zm00001d044639	2	11	0	6	0.307692	M2
1866	Zm00001d023272	Zm00001d044657	11	0	8	0	-0.578947	M1
1867	Zm00001d023280	Zm00001d044660	0	0	0	19	NotExpressed	equal
1868	Zm00001d023280	Zm00001d044660	0	0	0	19	NotExpressed	equal
1869	Zm00001d023280	Zm00001d044660	0	0	0	19	NotExpressed	equal
1870	Zm00001d023291	Zm00001d044663	2	0	17	0	-0.105263	M1
1871	Zm00001d023293	Zm00001d044664	0	19	0	0	-1	M2
1872	Zm00001d023299	Zm00001d044667	19	0	0	0	-1	M1
1873	Zm00001d023309	Zm00001d044673	19	0	0	0	-1	M1
1874	Zm00001d023345	Zm00001d044685	15	0	0	4	-1	M1
1875	Zm00001d023366	Zm00001d044691	0	18	1	0	-0.947368	M2
1876	Zm00001d023367	Zm00001d044692	1	2	16	0	0.0110803	M2
1877	Zm00001d023371	Zm00001d044694	1	2	16	0	0.0110803	M2
1878	Zm00001d023378	Zm00001d044695	1	4	14	0	0.0110803	M2
1879	Zm00001d023400	Zm00001d044703	0	16	3	0	-0.842105	M2
1880	Zm00001d023422	Zm00001d044707	9	0	0	10	-1	M1
1881	Zm00001d023423	Zm00001d044713	19	0	0	0	-1	M1
1882	Zm00001d023507	Zm00001d041920	0	0	0	19	NotExpressed	equal
1883	Zm00001d023510	Zm00001d041918	1	1	17	0	0.0110803	equal
1884	Zm00001d023520	Zm00001d041911	2	0	17	0	-0.105263	M1
1885	Zm00001d023521	Zm00001d041912	15	0	4	0	-0.789474	M1
1886	Zm00001d023522	Zm00001d041913	2	12	5	0	0.155125	M2
1887	Zm00001d023539	Zm00001d041883	0	0	0	19	NotExpressed	equal
1888	Zm00001d023542	Zm00001d041882	0	0	0	19	NotExpressed	equal
1889	Zm00001d023542	Zm00001d041882	0	0	0	19	NotExpressed	equal
1890	Zm00001d023544	Zm00001d041877	11	1	7	0	0.0110803	M1
[truncated: 3,162 more rows]
